# Supplementary material for: Genome-wide identification and functional analysis of Dof transcription factor family in Camelina sativa
Source: PubMed Central journal article supplement (PMC9730592; doi:10.1186/s12864-022-09056-9), 2022-12-08
Supplement: 12864_2022_9056_MOESM2_ESM.pdf [file 12864_2022_9056_MOESM2_ESM.pdf]

**Fig. S1** Details of 10 Motifs of CsDofs.

| Domain   | E-value   | Sites | Width | Consensus sequence                                                                   |
|----------|-----------|-------|-------|--------------------------------------------------------------------------------------|
| Motif 1  | 2.9e-4978 | 103   | 50    |    |
| Motif 2  | 1.6e-185  | 10    | 33    |    |
| Motif 3  | 8.5e-246  | 10    | 50    |    |
| Motif 4  | 2.9e-219  | 9     | 41    |    |
| Motif 5  | 3.2e-214  | 7     | 50    |    |
| Motif 6  | 1.7e-161  | 21    | 21    |    |
| Motif 7  | 2.9e-161  | 45    | 11    |     |
| Motif 8  | 4.9e-184  | 15    | 29    |   |
| Motif 9  | 1.1e-154  | 60    | 21    |  |
| Motif 10 | 2.1e-144  | 18    | 21    |  |
