# Supplementary material for: Genome-wide identification and functional analysis of Dof transcription factor family in Camelina sativa
Source: PubMed Central journal article supplement (PMC9730592; doi:10.1186/s12864-022-09056-9), 2022-12-08
Supplement: 12864_2022_9056_MOESM4_ESM.pdf [file 12864_2022_9056_MOESM4_ESM.pdf]

Table S2 Duplication gene pair of *CsDof*

| Duplication gene pair |              | Ka    | Ks    | Ka/Ks | Divergence time (MYA) | Duplication gene pair |              | Ka    | Ks    | Ka/Ks | Divergence time (MYA) |
|-----------------------|--------------|-------|-------|-------|-----------------------|-----------------------|--------------|-------|-------|-------|-----------------------|
| Csa04g051210          | Csa05g016230 | 0.003 | 0.125 | 0.022 | 7.60                  | Csa01g024360          | Csa15g031650 | 0.013 | 0.054 | 0.246 | 3.28                  |
| Csa14g036700          | Csa03g032300 | 0.003 | 0.093 | 0.027 | 5.66                  | Csa11g094130          | Csa04g026300 | 0.195 | 0.786 | 0.249 | 47.81                 |
| Csa04g051210          | Csa06g040340 | 0.004 | 0.09  | 0.045 | 5.47                  | Csa06g019350          | Csa09g039660 | 0.024 | 0.095 | 0.249 | 5.78                  |
| Csa17g041880          | Csa03g032300 | 0.008 | 0.121 | 0.063 | 7.36                  | Csa11g099290          | Csa18g035890 | 0.017 | 0.069 | 0.252 | 4.20                  |
| Csa11g099790          | Csa02g071140 | 0.008 | 0.098 | 0.079 | 5.96                  | Csa16g016240          | Csa07g015680 | 0.011 | 0.043 | 0.265 | 2.62                  |
| Csa05g016230          | Csa06g040340 | 0.007 | 0.085 | 0.08  | 5.17                  | Csa04g038300          | Csa09g059550 | 0.018 | 0.066 | 0.271 | 4.01                  |
| Csa04g038300          | Csa06g026770 | 0.006 | 0.075 | 0.083 | 4.56                  | Csa05g038090          | Csa07g016040 | 0.011 | 0.039 | 0.272 | 2.37                  |
| Csa04g030380          | Csa09g047820 | 0.012 | 0.144 | 0.086 | 8.76                  | Csa06g026770          | Csa09g059550 | 0.018 | 0.066 | 0.272 | 4.01                  |
| Csa10g018980          | Csa11g020730 | 0.006 | 0.071 | 0.087 | 4.32                  | Csa17g027260          | Csa03g025140 | 0.017 | 0.062 | 0.275 | 3.77                  |
| Csa11g094710          | Csa18g034230 | 0.006 | 0.053 | 0.109 | 3.22                  | Csa11g003480          | Csa12g003340 | 0.029 | 0.1   | 0.286 | 6.08                  |
| Csa05g035600          | Csa07g015680 | 0.006 | 0.058 | 0.111 | 3.53                  | Csa10g046910          | Csa11g055680 | 0.014 | 0.049 | 0.29  | 2.98                  |
| Csa11g102460          | Csa02g073390 | 0.007 | 0.062 | 0.112 | 3.77                  | Csa18g040580          | Csa06g024450 | 0.28  | 0.963 | 0.291 | 58.58                 |
| Csa17g073130          | Csa03g051350 | 0.002 | 0.018 | 0.114 | 1.09                  | Csa11g103980          | Csa09g053360 | 0.269 | 0.914 | 0.294 | 55.60                 |
| Csa11g020730          | Csa12g030340 | 0.009 | 0.075 | 0.114 | 4.56                  | Csa10g003120          | Csa12g003340 | 0.034 | 0.114 | 0.298 | 6.93                  |
| Csa11g094130          | Csa02g067130 | 0.012 | 0.098 | 0.12  | 5.96                  | Csa18g033540          | Csa02g067130 | 0.036 | 0.114 | 0.315 | 6.93                  |
| Csa18g039010          | Csa02g073390 | 0.007 | 0.057 | 0.121 | 3.47                  | Csa10g003120          | Csa11g003480 | 0.019 | 0.059 | 0.32  | 3.59                  |
| Csa10g046910          | Csa12g081790 | 0.013 | 0.11  | 0.121 | 6.69                  | Csa05g086300          | Csa07g036310 | 0.027 | 0.08  | 0.331 | 4.87                  |
| Csa20g002520          | Csa08g062200 | 0.002 | 0.018 | 0.124 | 1.09                  | Csa03g028730          | Csa07g036310 | 0.285 | 0.834 | 0.342 | 50.73                 |
| Csa18g035890          | Csa02g070560 | 0.012 | 0.092 | 0.126 | 5.60                  | Csa11g025410          | Csa12g037460 | 0.041 | 0.117 | 0.348 | 7.12                  |
| Csa11g055680          | Csa12g081790 | 0.016 | 0.112 | 0.141 | 6.81                  | Csa10g022390          | Csa12g037460 | 0.039 | 0.109 | 0.357 | 6.63                  |
| Csa06g021150          | Csa09g047820 | 0.019 | 0.136 | 0.141 | 8.27                  | Csa14g031920          | Csa07g036310 | 0.306 | 0.853 | 0.359 | 51.89                 |
| Csa16g016640          | Csa07g016040 | 0.006 | 0.041 | 0.142 | 2.49                  | Csa02g002370          | Csa08g053300 | 0.018 | 0.051 | 0.36  | 3.10                  |
| Csa15g031650          | Csa19g029310 | 0.002 | 0.015 | 0.147 | 0.91                  | Csa17g034060          | Csa07g036310 | 0.282 | 0.781 | 0.361 | 47.51                 |
| Csa18g036390          | Csa02g071140 | 0.013 | 0.085 | 0.15  | 5.17                  | Csa01g024360          | Csa19g029310 | 0.011 | 0.03  | 0.365 | 1.82                  |
| Csa13g056100          | Csa08g053300 | 0.007 | 0.048 | 0.151 | 2.92                  | Csa06g024450          | Csa09g053360 | 0.018 | 0.049 | 0.37  | 2.98                  |
| Csa14g009010          | Csa03g011080 | 0.004 | 0.026 | 0.152 | 1.58                  | Csa11g094130          | Csa18g033540 | 0.042 | 0.11  | 0.384 | 6.69                  |
| Csa04g065700          | Csa05g094020 | 0.177 | 1.16  | 0.153 | 70.56                 | Csa04g041620          | Csa09g067350 | 0.024 | 0.056 | 0.42  | 3.41                  |
| Csa14g051530          | Csa03g051350 | 0.013 | 0.084 | 0.153 | 5.11                  | Csa18g034230          | Csa02g067810 | 0.024 | 0.055 | 0.431 | 3.35                  |
| Csa14g026580          | Csa03g025140 | 0.02  | 0.129 | 0.155 | 7.85                  | Csa17g090650          | Csa03g058660 | 0.025 | 0.05  | 0.496 | 3.04                  |
| Csa04g065700          | Csa05g002560 | 0.014 | 0.079 | 0.171 | 4.81                  | Csa04g026300          | Csa06g019350 | 0.009 | 0.018 | 0.502 | 1.09                  |
| Csa04g030380          | Csa06g021150 | 0.019 | 0.103 | 0.185 | 6.27                  | Csa11g094710          | Csa02g067810 | 0.023 | 0.041 | 0.556 | 2.49                  |
| Csa13g002360          | Csa08g062200 | 0.003 | 0.018 | 0.186 | 1.09                  | Csa10g022390          | Csa11g025410 | 0.03  | 0.049 | 0.621 | 2.98                  |
| Csa05g094020          | Csa07g002770 | 0.007 | 0.037 | 0.195 | 2.25                  | Csa04g036060          | Csa06g024450 | 0.027 | 0.044 | 0.628 | 2.68                  |
| Csa04g041620          | Csa06g029980 | 0.017 | 0.088 | 0.197 | 5.35                  | Csa07g066190          | Csa09g099480 | 0.066 | 0.1   | 0.661 | 6.08                  |
| Csa04g026300          | Csa09g039660 | 0.018 | 0.089 | 0.205 | 5.41                  | Csa04g036060          | Csa09g053360 | 0.022 | 0.032 | 0.671 | 1.95                  |

| Duplication gene pair |              | Ka    | Ks    | Ka/Ks | Divergence time (MYA) | Duplication gene pair |              | Ka    | Ks    | Ka/Ks | Divergence time (MYA) |
|-----------------------|--------------|-------|-------|-------|-----------------------|-----------------------|--------------|-------|-------|-------|-----------------------|
| Csa06g029980          | Csa09g067350 | 0.013 | 0.065 | 0.209 | 3.95                  | Csa16g031000          | Csa07g036310 | 0.111 | 0.163 | 0.683 | 9.91                  |
| Csa17g011020          | Csa03g011080 | 0.007 | 0.03  | 0.216 | 1.82                  | Csa10g022470          | Csa11g025480 | 0.042 | 0.06  | 0.693 | 3.65                  |
| Csa11g099290          | Csa02g070560 | 0.017 | 0.08  | 0.217 | 4.87                  | Csa14g059960          | Csa03g058660 | 0.027 | 0.035 | 0.767 | 2.13                  |
| Csa16g003010          | Csa07g002770 | 0.006 | 0.027 | 0.223 | 1.64                  | Csa16g007040          | Csa07g007240 | 0.017 | 0.021 | 0.789 | 1.28                  |
| Csa10g018980          | Csa12g030340 | 0.005 | 0.021 | 0.23  | 1.28                  | Csa11g025480          | Csa12g037530 | 0.035 | 0.044 | 0.792 | 2.68                  |
| Csa11g094130          | Csa06g019350 | 0.202 | 0.83  | 0.243 | 50.49                 | Csa10g022470          | Csa12g037530 | 0.03  | 0.028 | 1.061 | 1.70                  |
