# Supplementary material for: Genome-wide identification and functional analysis of Dof transcription factor family in Camelina sativa
Source: PubMed Central journal article supplement (PMC9730592; doi:10.1186/s12864-022-09056-9), 2022-12-08
Supplement: 12864_2022_9056_MOESM5_ESM.pdf [file 12864_2022_9056_MOESM5_ESM.pdf]

**Table S3. All gene pairs of *C. sativa* and *A. thaliana***

| <i>C. sativa</i> | <i>A. thaliana</i> |
|------------------|--------------------|
| Csa14g009010     | AT1G07640          |
| Csa17g011020     | AT1G07640          |
| Csa03g011080     | AT1G07640          |
| Csa14g026580     | AT1G21340          |
| Csa17g027260     | AT1G21340          |
| Csa03g025140     | AT1G21340          |
| Csa14g031920     | AT1G26790          |
| Csa17g034060     | AT1G26790          |
| Csa03g028730     | AT1G26790          |
| Csa14g036700     | AT1G29160          |
| Csa17g041880     | AT1G29160          |
| Csa03g032300     | AT1G29160          |
| Csa03g058660     | AT1G51700          |
| Csa09g099480     | AT1G64620          |
| Csa16g031000     | AT1G69570          |
| Csa05g086300     | AT1G69570          |
| Csa07g036310     | AT1G69570          |
| Csa05g038090     | AT2G28510          |
| Csa07g016040     | AT2G28510          |
| Csa16g016240     | AT2G28810          |
| Csa05g035600     | AT2G28810          |
| Csa07g015680     | AT2G28810          |
| Csa16g007040     | AT2G34140          |
| Csa07g007240     | AT2G34140          |
| Csa04g051210     | AT2G37590          |
| Csa05g016230     | AT2G37590          |
| Csa06g040340     | AT2G37590          |
| Csa04g065700     | AT2G46590          |
| Csa05g002560     | AT2G46590          |
| Csa01g024360     | AT3G21270          |
| Csa15g031650     | AT3G21270          |
| Csa19g029310     | AT3G21270          |
| Csa04g026300     | AT3G45610          |
| Csa06g019350     | AT3G45610          |
| Csa09g039660     | AT3G45610          |
| Csa04g030380     | AT3G47500          |
| Csa06g021150     | AT3G47500          |
| Csa09g047820     | AT3G47500          |
| Csa04g036060     | AT3G50410          |
| Csa06g024450     | AT3G50410          |
| Csa09g053360     | AT3G50410          |
| Csa04g038300     | AT3G52440          |
| Csa06g026770     | AT3G52440          |
| Csa09g059550     | AT3G52440          |
| Csa04g041620     | AT3G55370          |
| Csa06g029980     | AT3G55370          |
| Csa09g067350     | AT3G55370          |
| Csa16g003010     | AT3G61850          |
| Csa05g094020     | AT3G61850          |
| Csa07g002770     | AT3G61850          |
| Csa13g056100     | AT4G00940          |

| <i>C. sativa</i> | <i>A. thaliana</i> |
|------------------|--------------------|
| Csa02g002370     | AT4G00940          |
| Csa08g053300     | AT4G00940          |
| Csa10g022390     | AT4G21080          |
| Csa11g025480     | AT4G21080          |
| Csa12g037400     | AT4G21080          |
| Csa10g018980     | AT4G24060          |
| Csa11g020730     | AT4G24060          |
| Csa12g030340     | AT4G24060          |
| Csa11g003480     | AT4G38000          |
| Csa12g003340     | AT4G38000          |
| Csa13g002360     | AT5G02460          |
| Csa20g002520     | AT5G02460          |
| Csa08g062200     | AT5G02460          |
| Csa10g046910     | AT5G39660          |
| Csa11g055680     | AT5G39660          |
| Csa12g081790     | AT5G39660          |
| Csa11g094130     | AT5G60200          |
| Csa18g033540     | AT5G60200          |
| Csa02g067130     | AT5G60200          |
| Csa11g094710     | AT5G60850          |
| Csa18g034230     | AT5G60850          |
| Csa02g067810     | AT5G60850          |
| Csa11g099290     | AT5G62430          |
| Csa18g035890     | AT5G62430          |
| Csa02g070560     | AT5G62430          |
| Csa11g099790     | AT5G62940          |
| Csa18g036390     | AT5G62940          |
| Csa02g071140     | AT5G62940          |
| Csa11g102460     | AT5G65590          |
| Csa18g039010     | AT5G65590          |
| Csa11g103980     | AT5G66940          |
| Csa18g040580     | AT5G66940          |
| Csa02g075810     | AT5G66940          |
