# Supplementary material for: Genome-wide identification and functional analysis of Dof transcription factor family in Camelina sativa
Source: PubMed Central journal article supplement (PMC9730592; doi:10.1186/s12864-022-09056-9), 2022-12-08
Supplement: 12864_2022_9056_MOESM6_ESM.pdf [file 12864_2022_9056_MOESM6_ESM.pdf]

**Table S4. All accession numbers of sequences used in this article.**

| <b>Species</b>     | <b>Gene name</b> | <b>Gene ID</b> |
|--------------------|------------------|----------------|
| <i>A. thaliana</i> | <i>AtDof1.1</i>  | At1g07640      |
|                    | <i>AtDof1.2</i>  | At1g21340      |
|                    | <i>AtDof1.3</i>  | At1g26790      |
|                    | <i>AtDof1.4</i>  | At1g28310      |
|                    | <i>AtDof1.5</i>  | At1g29160      |
|                    | <i>AtDof1.6</i>  | At1g47650      |
|                    | <i>AtDof1.7</i>  | At1g51700      |
|                    | <i>AtDof1.8</i>  | At1g64620      |
|                    | <i>AtDof1.10</i> | At1g69570      |
|                    | <i>AtDof2.1</i>  | At2g28510      |
|                    | <i>AtDof2.2</i>  | At2g28810      |
|                    | <i>AtDof2.3</i>  | At2g34140      |
|                    | <i>AtDof2.4</i>  | At2g37590      |
|                    | <i>AtDof2.5</i>  | At2g46590      |
|                    | <i>AtDof3.1</i>  | At3g21270      |
|                    | <i>AtDof3.2</i>  | At3g45610      |
|                    | <i>AtDof3.3</i>  | At3g47500      |
|                    | <i>AtDof3.4</i>  | At3g50410      |
|                    | <i>AtDof3.5</i>  | At3g52440      |
|                    | <i>AtDof3.6</i>  | At3g55370      |
|                    | <i>AtDof3.7</i>  | At3g61850      |
|                    | <i>AtDof4.1</i>  | At4g00940      |
|                    | <i>AtDof4.2</i>  | At4g21030      |
|                    | <i>AtDof4.3</i>  | At4g21040      |
|                    | <i>AtDof4.4</i>  | At4g21050      |
|                    | <i>AtDof4.5</i>  | At4g21080      |
|                    | <i>AtDof4.6</i>  | At4g24060      |
|                    | <i>AtDof4.7</i>  | At4g38000      |
|                    | <i>AtDof5.1</i>  | At5g02460      |
|                    | <i>AtDof5.2</i>  | At5g39660      |
|                    | <i>AtDof5.3</i>  | At5g60200      |
|                    | <i>AtDof5.4</i>  | At5g60850      |
| <i>AtDof5.5</i>    | At5g62430        |                |
| <i>AtDof5.6</i>    | At5g62940        |                |
| <i>AtDof5.7</i>    | At5g65590        |                |
| <i>AtDof5.8</i>    | At5g66940        |                |
| <b>Species</b>     | <b>Gene ID</b>   |                |
| <i>B. napus</i>    |                  | BnaA01g00130D  |
|                    |                  | BnaA01g21270D  |
|                    |                  | BnaA01g25190D  |
|                    |                  | BnaA02g06470D  |

| <b>Species</b>  | <b>Gene ID</b> |
|-----------------|----------------|
|                 | BnaA03g17300D  |
|                 | BnaA03g21490D  |
|                 | BnaA03g36180D  |
|                 | BnaA03g39760D  |
|                 | BnaA03g41790D  |
|                 | BnaA04g16440D  |
|                 | BnaA04g16710D  |
|                 | BnaA04g19980D  |
|                 | BnaA04g27160D  |
|                 | BnaA05g15330D  |
|                 | BnaA06g15080D  |
|                 | BnaA06g24490D  |
|                 | BnaA07g08180D  |
|                 | BnaA07g08490D  |
|                 | BnaA07g12230D  |
|                 | BnaA07g24230D  |
|                 | BnaA08g01830D  |
|                 | BnaA08g03730D  |
|                 | BnaA08g09880D  |
|                 | BnaA08g09890D  |
|                 | BnaA08g09900D  |
| <i>B. napus</i> | BnaA08g09920D  |
|                 | BnaA08g15120D  |
|                 | BnaA08g19870D  |
|                 | BnaA08g29080D  |
|                 | BnaA09g05460D  |
|                 | BnaA09g06280D  |
|                 | BnaA09g07670D  |
|                 | BnaA09g29270D  |
|                 | BnaA09g34950D  |
|                 | BnaA09g49290D  |
|                 | BnaA10g13030D  |
|                 | BnaA10g27100D  |
|                 | BnaC01g01040D  |
|                 | BnaC01g12440D  |
|                 | BnaC02g41820D  |
|                 | BnaC02g43890D  |
|                 | BnaC03g20790D  |
|                 | BnaC03g25870D  |
|                 | BnaC03g42040D  |
|                 | BnaC03g58500D  |
|                 | BnaC03g58930D  |

| <b>Species</b>  | <b>Gene ID</b> |
|-----------------|----------------|
| <i>B. napus</i> | BnaC03g62060D  |
|                 | BnaC03g63990D  |
|                 | BnaC03g64440D  |
|                 | BnaC03g64450D  |
|                 | BnaC03g64460D  |
|                 | BnaC04g00830D  |
|                 | BnaC04g31720D  |
|                 | BnaC04g44370D  |
|                 | BnaC04g45310D  |
|                 | BnaC04g50910D  |
|                 | BnaC05g05320D  |
|                 | BnaC05g16580D  |
|                 | BnaC05g22130D  |
|                 | BnaC06g01120D  |
|                 | BnaC06g08980D  |
|                 | BnaC06g12530D  |
|                 | BnaC07g14530D  |
|                 | BnaC07g16430D  |
|                 | BnaC07g31770D  |
|                 | BnaC07g32880D  |
|                 | BnaC07g36540D  |
|                 | BnaC08g21910D  |
|                 | BnaC09g05040D  |
|                 | BnaC09g07610D  |
|                 | BnaC09g12040D  |
