# Supplementary material for: Genome-wide identification and functional analysis of Dof transcription factor family in Camelina sativa
Source: PubMed Central journal article supplement (PMC9730592; doi:10.1186/s12864-022-09056-9), 2022-12-08
Supplement: 12864_2022_9056_MOESM7_ESM.pdf [file 12864_2022_9056_MOESM7_ESM.pdf]

**Table S5. All gene pairs of *C. sativa* and *B. napus*.**

| <i>C. sativa</i> | <i>B. napus</i> |
|------------------|-----------------|
| Csa01g024360     | BnaA01g25190D   |
| Csa01g024360     | BnaA03g36180D   |
| Csa01g024360     | BnaC03g42040D   |
| Csa10g003120     | BnaA01g00130D   |
| Csa10g003120     | BnaC01g01040D   |
| Csa10g022470     | BnaC03g64440D   |
| Csa10g022470     | BnaC03g63990D   |
| Csa10g046910     | BnaC04g31720D   |
| Csa10g022470     | BnaC07g36540D   |
| Csa11g003480     | BnaA01g00130D   |
| Csa11g094130     | BnaA02g06470D   |
| Csa11g094710     | BnaA03g39760D   |
| Csa11g103980     | BnaA07g12230D   |
| Csa11g103980     | BnaA09g07670D   |
| Csa11g094130     | BnaA10g13030D   |
| Csa11g003480     | BnaC01g01040D   |
| Csa11g102460     | BnaC02g43890D   |
| Csa11g025480     | BnaC03g64440D   |
| Csa11g055680     | BnaC04g31720D   |
| Csa11g103980     | BnaC07g16430D   |
| Csa11g025480     | BnaC07g36540D   |
| Csa11g103980     | BnaC09g07610D   |
| Csa12g003340     | BnaA01g00130D   |
| Csa12g003340     | BnaC01g01040D   |
| Csa12g037400     | BnaC03g64440D   |
| Csa12g081790     | BnaC04g31720D   |
| Csa12g037400     | BnaC07g36540D   |
| Csa14g059960     | BnaA05g15330D   |
| Csa14g026580     | BnaA06g15080D   |
| Csa14g036700     | BnaA07g08180D   |
| Csa14g031920     | BnaA08g19870D   |
| Csa14g051530     | BnaA08g03730D   |
| Csa14g009010     | BnaA08g29080D   |
| Csa14g059960     | BnaA08g01830D   |
| Csa14g031920     | BnaA09g29270D   |
| Csa14g036700     | BnaC03g58930D   |
| Csa14g026580     | BnaC05g16580D   |
| Csa14g009010     | BnaC05g05320D   |
| Csa14g036700     | BnaC05g22130D   |
| Csa14g059960     | BnaC06g08980D   |
| Csa14g026580     | BnaC07g14530D   |
| Csa15g031650     | BnaA01g25190D   |
| Csa15g031650     | BnaA03g36180D   |
| Csa15g031650     | BnaC03g42040D   |
| Csa16g007040     | BnaA04g19980D   |
| Csa16g016240     | BnaA04g16710D   |
| Csa16g016640     | BnaA04g16440D   |
| Csa16g031000     | BnaA07g24230D   |
| Csa16g007040     | BnaC04g44370D   |

| <i>C. sativa</i> | <i>B. napus</i> |
|------------------|-----------------|
| Csa17g090650     | BnaA05g15330D   |
| Csa17g027260     | BnaA06g15080D   |
| Csa17g041880     | BnaA07g08180D   |
| Csa17g034060     | BnaA08g19870D   |
| Csa17g073130     | BnaA08g03730D   |
| Csa17g011020     | BnaA08g29080D   |
| Csa17g034060     | BnaA09g29270D   |
| Csa17g041880     | BnaC03g58930D   |
| Csa17g011020     | BnaC05g05320D   |
| Csa17g041880     | BnaC05g22130D   |
| Csa17g027260     | BnaC05g16580D   |
| Csa17g090650     | BnaC06g08980D   |
| Csa17g027260     | BnaC07g14530D   |
| Csa18g033540     | BnaA02g06470D   |
| Csa18g034230     | BnaA03g39760D   |
| Csa18g040580     | BnaA07g12230D   |
| Csa18g040580     | BnaA09g07670D   |
| Csa18g033540     | BnaA10g13030D   |
| Csa18g039010     | BnaC02g43890D   |
| Csa18g040580     | BnaC07g16430D   |
| Csa18g040580     | BnaC09g07610D   |
| Csa19g029310     | BnaA01g25190D   |
| Csa19g029310     | BnaA03g36180D   |
| Csa19g029310     | BnaC03g42040D   |
| Csa02g067130     | BnaA02g06470D   |
| Csa02g067810     | BnaA03g39760D   |
| Csa02g075810     | BnaA07g12230D   |
| Csa02g075810     | BnaA09g07670D   |
| Csa02g067130     | BnaA10g13030D   |
| Csa02g075810     | BnaC07g16430D   |
| Csa02g075810     | BnaC09g07610D   |
| Csa03g058660     | BnaA05g15330D   |
| Csa03g025140     | BnaA06g15080D   |
| Csa03g032300     | BnaA07g08180D   |
| Csa03g051350     | BnaA08g03730D   |
| Csa03g028730     | BnaA08g19870D   |
| Csa03g011080     | BnaA08g29080D   |
| Csa03g028730     | BnaA09g29270D   |
| Csa03g032300     | BnaC03g58930D   |
| Csa03g011080     | BnaC05g05320D   |
| Csa03g025140     | BnaC05g16580D   |
| Csa03g032300     | BnaC05g22130D   |
| Csa03g058660     | BnaC06g08980D   |
| Csa03g025140     | BnaC07g14530D   |
| Csa04g036060     | BnaA01g21270D   |
| Csa04g065700     | BnaA03g21490D   |
| Csa04g041620     | BnaA09g34950D   |
| Csa04g065700     | BnaC03g25870D   |
| Csa04g065700     | BnaC04g50910D   |
| Csa04g065700     | BnaC04g00830D   |
| Csa05g002560     | BnaA03g21490D   |

---

| <i>C. sativa</i> | <i>B. napus</i> |
|------------------|-----------------|
| Csa05g035600     | BnaA04g16710D   |
| Csa05g086300     | BnaA07g24230D   |
| Csa05g002560     | BnaC03g25870D   |
| Csa05g002560     | BnaC04g50910D   |
| Csa05g002560     | BnaC04g00830D   |
| Csa06g024450     | BnaA01g21270D   |
| Csa06g029980     | BnaA09g34950D   |
| Csa06g024450     | BnaC08g21910D   |
| Csa07g007240     | BnaA04g19980D   |
| Csa07g015680     | BnaA04g16710D   |
| Csa07g036310     | BnaA07g24230D   |
| Csa07g007240     | BnaC04g44370D   |
| Csa09g053360     | BnaA01g21270D   |
| Csa09g067350     | BnaA09g34950D   |
| Csa09g099480     | BnaC09g12040D   |

---
