# Supplementary material for: Genome-wide identification and functional analysis of Dof transcription factor family in Camelina sativa
Source: PubMed Central journal article supplement (PMC9730592; doi:10.1186/s12864-022-09056-9), 2022-12-08
Supplement: 12864_2022_9056_MOESM8_ESM.pdf [file 12864_2022_9056_MOESM8_ESM.pdf]

**Table S6. Details of the cis-elements identified in *CsDof* gene family.**

| Name          | Cis-element     | Start position | Stop position | Function                                                            |
|---------------|-----------------|----------------|---------------|---------------------------------------------------------------------|
| <i>CsDof1</i> | ABRE            | 1737           | 1742          | abscisic acid responsiveness                                        |
| <i>CsDof1</i> | TC-rich repeats | 510            | 519           | cis-acting element involved in defense and stress responsiveness    |
| <i>CsDof1</i> | LTR             | 1042           | 1048          | cis-acting element involved in low-temperature responsiveness       |
| <i>CsDof1</i> | TCA-element     | 1200           | 1209          | cis-acting element involved in salicylic acid responsiveness        |
| <i>CsDof1</i> | ARE             | 30             | 36            | cis-acting regulatory element essential for the anaerobic induction |
| <i>CsDof1</i> | ARE             | 1127           | 1133          | cis-acting regulatory element essential for the anaerobic induction |
| <i>CsDof1</i> | ARE             | 1145           | 1151          | cis-acting regulatory element essential for the anaerobic induction |
| <i>CsDof1</i> | AuxRR-core      | 82             | 89            | cis-acting regulatory element involved in auxin responsiveness      |
| <i>CsDof1</i> | G-Box           | 1737           | 1743          | cis-acting regulatory element involved in light responsiveness      |
| <i>CsDof1</i> | G-box           | 1178           | 1184          | cis-acting regulatory element involved in light responsiveness      |
| <i>CsDof1</i> | G-box           | 1737           | 1745          | cis-acting regulatory element involved in light responsiveness      |
| <i>CsDof1</i> | CGTCA-motif     | 365            | 370           | cis-acting regulatory element involved in the MeJA-responsiveness   |
| <i>CsDof1</i> | TGACG-motif     | 365            | 370           | cis-acting regulatory element involved in the MeJA-responsiveness   |
| <i>CsDof1</i> | CAAT-box        | 72             | 77            | common cis-acting element in promoter and enhancer regions          |
| <i>CsDof1</i> | CAAT-box        | 121            | 126           | common cis-acting element in promoter and enhancer regions          |
| <i>CsDof1</i> | CAAT-box        | 443            | 448           | common cis-acting element in promoter and enhancer regions          |
| <i>CsDof1</i> | CAAT-box        | 667            | 672           | common cis-acting element in promoter and enhancer regions          |
| <i>CsDof1</i> | CAAT-box        | 733            | 738           | common cis-acting element in promoter and enhancer regions          |
| <i>CsDof1</i> | CAAT-box        | 764            | 769           | common cis-acting element in promoter and enhancer regions          |
| <i>CsDof1</i> | CAAT-box        | 797            | 802           | common cis-acting element in promoter and enhancer regions          |
| <i>CsDof1</i> | CAAT-box        | 803            | 808           | common cis-acting element in promoter and enhancer regions          |
| <i>CsDof1</i> | CAAT-box        | 922            | 927           | common cis-acting element in promoter and enhancer regions          |
| <i>CsDof1</i> | CAAT-box        | 1064           | 1069          | common cis-acting element in promoter and enhancer regions          |
| <i>CsDof1</i> | CAAT-box        | 1218           | 1223          | common cis-acting element in promoter and enhancer regions          |
| <i>CsDof1</i> | CAAT-box        | 1244           | 1249          | common cis-acting element in promoter and enhancer regions          |
| <i>CsDof1</i> | CAAT-box        | 1409           | 1414          | common cis-acting element in promoter and enhancer regions          |
| <i>CsDof1</i> | CAAT-box        | 1594           | 1599          | common cis-acting element in promoter and enhancer regions          |
| <i>CsDof1</i> | CAAT-box        | 1674           | 1679          | common cis-acting element in promoter and enhancer regions          |
| <i>CsDof1</i> | CAAT-box        | 1898           | 1903          | common cis-acting element in promoter and enhancer regions          |
| <i>CsDof1</i> | CAAT-box        | 1956           | 1961          | common cis-acting element in promoter and enhancer regions          |
| <i>CsDof1</i> | TATA-box        | 92             | 98            | core promoter element around -30 of transcription start             |
| <i>CsDof1</i> | TATA-box        | 93             | 99            | core promoter element around -30 of transcription start             |
| <i>CsDof1</i> | TATA-box        | 94             | 98            | core promoter element around -30 of transcription start             |
| <i>CsDof1</i> | TATA-box        | 259            | 263           | core promoter element around -30 of transcription start             |
| <i>CsDof1</i> | TATA-box        | 291            | 297           | core promoter element around -30 of transcription start             |
| <i>CsDof1</i> | TATA-box        | 292            | 298           | core promoter element around -30 of transcription start             |
| <i>CsDof1</i> | TATA-box        | 293            | 299           | core promoter element around -30 of transcription start             |
| <i>CsDof1</i> | TATA-box        | 294            | 298           | core promoter element around -30 of transcription start             |
| <i>CsDof1</i> | TATA-box        | 302            | 306           | core promoter element around -30 of transcription start             |
| <i>CsDof1</i> | TATA-box        | 307            | 311           | core promoter element around -30 of transcription start             |
| <i>CsDof1</i> | TATA-box        | 322            | 328           | core promoter element around -30 of transcription start             |
| <i>CsDof1</i> | TATA-box        | 323            | 328           | core promoter element around -30 of transcription start             |
| <i>CsDof1</i> | TATA-box        | 324            | 328           | core promoter element around -30 of transcription start             |
| <i>CsDof1</i> | TATA-box        | 327            | 333           | core promoter element around -30 of transcription start             |
| <i>CsDof1</i> | TATA-box        | 328            | 333           | core promoter element around -30 of transcription start             |
| <i>CsDof1</i> | TATA-box        | 329            | 333           | core promoter element around -30 of transcription start             |
| <i>CsDof1</i> | TATA-box        | 355            | 361           | core promoter element around -30 of transcription start             |
| <i>CsDof1</i> | TATA-box        | 356            | 362           | core promoter element around -30 of transcription start             |
| <i>CsDof1</i> | TATA-box        | 357            | 363           | core promoter element around -30 of transcription start             |
| <i>CsDof1</i> | TATA-box        | 358            | 362           | core promoter element around -30 of transcription start             |

| Name          | Cis-element     | Start position | Stop position | Function                                                            |
|---------------|-----------------|----------------|---------------|---------------------------------------------------------------------|
| <i>CsDof1</i> | TATA-box        | 492            | 499           | core promoter element around -30 of transcription start             |
| <i>CsDof1</i> | TATA-box        | 493            | 499           | core promoter element around -30 of transcription start             |
| <i>CsDof1</i> | TATA-box        | 494            | 499           | core promoter element around -30 of transcription start             |
| <i>CsDof1</i> | TATA-box        | 495            | 499           | core promoter element around -30 of transcription start             |
| <i>CsDof1</i> | TATA-box        | 621            | 627           | core promoter element around -30 of transcription start             |
| <i>CsDof1</i> | TATA-box        | 622            | 626           | core promoter element around -30 of transcription start             |
| <i>CsDof1</i> | TATA-box        | 749            | 755           | core promoter element around -30 of transcription start             |
| <i>CsDof1</i> | TATA-box        | 751            | 755           | core promoter element around -30 of transcription start             |
| <i>CsDof1</i> | TATA-box        | 821            | 825           | core promoter element around -30 of transcription start             |
| <i>CsDof1</i> | TATA-box        | 829            | 835           | core promoter element around -30 of transcription start             |
| <i>CsDof1</i> | TATA-box        | 830            | 835           | core promoter element around -30 of transcription start             |
| <i>CsDof1</i> | TATA-box        | 831            | 835           | core promoter element around -30 of transcription start             |
| <i>CsDof1</i> | TATA-box        | 1157           | 1165          | core promoter element around -30 of transcription start             |
| <i>CsDof1</i> | TATA-box        | 1158           | 1165          | core promoter element around -30 of transcription start             |
| <i>CsDof1</i> | TATA-box        | 1159           | 1165          | core promoter element around -30 of transcription start             |
| <i>CsDof1</i> | TATA-box        | 1160           | 1165          | core promoter element around -30 of transcription start             |
| <i>CsDof1</i> | TATA-box        | 1161           | 1165          | core promoter element around -30 of transcription start             |
| <i>CsDof1</i> | TATA-box        | 1231           | 1237          | core promoter element around -30 of transcription start             |
| <i>CsDof1</i> | TATA-box        | 1232           | 1237          | core promoter element around -30 of transcription start             |
| <i>CsDof1</i> | TATA-box        | 1233           | 1237          | core promoter element around -30 of transcription start             |
| <i>CsDof1</i> | TATA-box        | 1302           | 1306          | core promoter element around -30 of transcription start             |
| <i>CsDof1</i> | TATA-box        | 1337           | 1344          | core promoter element around -30 of transcription start             |
| <i>CsDof1</i> | TATA-box        | 1370           | 1376          | core promoter element around -30 of transcription start             |
| <i>CsDof1</i> | TATA-box        | 1371           | 1377          | core promoter element around -30 of transcription start             |
| <i>CsDof1</i> | TATA-box        | 1372           | 1376          | core promoter element around -30 of transcription start             |
| <i>CsDof1</i> | TATA-box        | 1537           | 1543          | core promoter element around -30 of transcription start             |
| <i>CsDof1</i> | TATA-box        | 1538           | 1543          | core promoter element around -30 of transcription start             |
| <i>CsDof1</i> | TATA-box        | 1539           | 1543          | core promoter element around -30 of transcription start             |
| <i>CsDof1</i> | TATA-box        | 1604           | 1612          | core promoter element around -30 of transcription start             |
| <i>CsDof1</i> | TATA-box        | 1652           | 1658          | core promoter element around -30 of transcription start             |
| <i>CsDof1</i> | TATA-box        | 1653           | 1658          | core promoter element around -30 of transcription start             |
| <i>CsDof1</i> | TATA-box        | 1654           | 1658          | core promoter element around -30 of transcription start             |
| <i>CsDof1</i> | TATA-box        | 1822           | 1826          | core promoter element around -30 of transcription start             |
| <i>CsDof1</i> | TATA-box        | 1841           | 1847          | core promoter element around -30 of transcription start             |
| <i>CsDof1</i> | TATA-box        | 1842           | 1848          | core promoter element around -30 of transcription start             |
| <i>CsDof1</i> | TATA-box        | 1843           | 1849          | core promoter element around -30 of transcription start             |
| <i>CsDof1</i> | TATA-box        | 1844           | 1850          | core promoter element around -30 of transcription start             |
| <i>CsDof1</i> | TATA-box        | 1846           | 1850          | core promoter element around -30 of transcription start             |
| <i>CsDof1</i> | TATA-box        | 1868           | 1872          | core promoter element around -30 of transcription start             |
| <i>CsDof1</i> | TATA-box        | 1900           | 1908          | core promoter element around -30 of transcription start             |
| <i>CsDof1</i> | TATA-box        | 1934           | 1938          | core promoter element around -30 of transcription start             |
| <i>CsDof1</i> | Sp1             | 1732           | 1738          | light responsive element                                            |
| <i>CsDof1</i> | GT1-motif       | 559            | 565           | light responsive element                                            |
| <i>CsDof1</i> | GT1-motif       | 1457           | 1464          | light responsive element                                            |
| <i>CsDof1</i> | MRE             | 612            | 619           | MYB binding site involved in light responsiveness                   |
| <i>CsDof2</i> | ABRE            | 799            | 804           | abscisic acid responsiveness                                        |
| <i>CsDof2</i> | TGA-element     | 456            | 462           | auxin-responsive element                                            |
| <i>CsDof2</i> | TGA-element     | 1807           | 1813          | auxin-responsive element                                            |
| <i>CsDof2</i> | AT-rich element | 1259           | 1269          | binding site of AT-rich DNA binding protein (ATBP-1)                |
| <i>CsDof2</i> | TCA-element     | 661            | 670           | cis-acting element involved in salicylic acid responsiveness        |
| <i>CsDof2</i> | ARE             | 690            | 696           | cis-acting regulatory element essential for the anaerobic induction |

| Name          | Cis-element | Start position | Stop position | Function                                                            |
|---------------|-------------|----------------|---------------|---------------------------------------------------------------------|
| <i>CsDof2</i> | ARE         | 1112           | 1118          | cis-acting regulatory element essential for the anaerobic induction |
| <i>CsDof2</i> | ARE         | 1316           | 1322          | cis-acting regulatory element essential for the anaerobic induction |
| <i>CsDof2</i> | G-box       | 798            | 804           | cis-acting regulatory element involved in light responsiveness      |
| <i>CsDof2</i> | CGTCA-motif | 874            | 879           | cis-acting regulatory element involved in the MeJA-responsiveness   |
| <i>CsDof2</i> | CGTCA-motif | 898            | 903           | cis-acting regulatory element involved in the MeJA-responsiveness   |
| <i>CsDof2</i> | TGACG-motif | 874            | 879           | cis-acting regulatory element involved in the MeJA-responsiveness   |
| <i>CsDof2</i> | TGACG-motif | 898            | 903           | cis-acting regulatory element involved in the MeJA-responsiveness   |
| <i>CsDof2</i> | CAAT-box    | 26             | 31            | common cis-acting element in promoter and enhancer regions          |
| <i>CsDof2</i> | CAAT-box    | 78             | 83            | common cis-acting element in promoter and enhancer regions          |
| <i>CsDof2</i> | CAAT-box    | 717            | 722           | common cis-acting element in promoter and enhancer regions          |
| <i>CsDof2</i> | CAAT-box    | 720            | 725           | common cis-acting element in promoter and enhancer regions          |
| <i>CsDof2</i> | CAAT-box    | 769            | 774           | common cis-acting element in promoter and enhancer regions          |
| <i>CsDof2</i> | CAAT-box    | 1030           | 1035          | common cis-acting element in promoter and enhancer regions          |
| <i>CsDof2</i> | CAAT-box    | 1048           | 1053          | common cis-acting element in promoter and enhancer regions          |
| <i>CsDof2</i> | CAAT-box    | 1253           | 1258          | common cis-acting element in promoter and enhancer regions          |
| <i>CsDof2</i> | CAAT-box    | 1289           | 1294          | common cis-acting element in promoter and enhancer regions          |
| <i>CsDof2</i> | CAAT-box    | 1346           | 1351          | common cis-acting element in promoter and enhancer regions          |
| <i>CsDof2</i> | CAAT-box    | 1377           | 1382          | common cis-acting element in promoter and enhancer regions          |
| <i>CsDof2</i> | CAAT-box    | 1429           | 1434          | common cis-acting element in promoter and enhancer regions          |
| <i>CsDof2</i> | TATA-box    | 139            | 145           | core promoter element around -30 of transcription start             |
| <i>CsDof2</i> | TATA-box    | 140            | 144           | core promoter element around -30 of transcription start             |
| <i>CsDof2</i> | TATA-box    | 165            | 174           | core promoter element around -30 of transcription start             |
| <i>CsDof2</i> | TATA-box    | 166            | 173           | core promoter element around -30 of transcription start             |
| <i>CsDof2</i> | TATA-box    | 167            | 173           | core promoter element around -30 of transcription start             |
| <i>CsDof2</i> | TATA-box    | 168            | 175           | core promoter element around -30 of transcription start             |
| <i>CsDof2</i> | TATA-box    | 169            | 175           | core promoter element around -30 of transcription start             |
| <i>CsDof2</i> | TATA-box    | 171            | 175           | core promoter element around -30 of transcription start             |
| <i>CsDof2</i> | TATA-box    | 177            | 186           | core promoter element around -30 of transcription start             |
| <i>CsDof2</i> | TATA-box    | 178            | 184           | core promoter element around -30 of transcription start             |
| <i>CsDof2</i> | TATA-box    | 179            | 186           | core promoter element around -30 of transcription start             |
| <i>CsDof2</i> | TATA-box    | 180            | 186           | core promoter element around -30 of transcription start             |
| <i>CsDof2</i> | TATA-box    | 181            | 187           | core promoter element around -30 of transcription start             |
| <i>CsDof2</i> | TATA-box    | 182            | 186           | core promoter element around -30 of transcription start             |
| <i>CsDof2</i> | TATA-box    | 304            | 311           | core promoter element around -30 of transcription start             |
| <i>CsDof2</i> | TATA-box    | 330            | 336           | core promoter element around -30 of transcription start             |
| <i>CsDof2</i> | TATA-box    | 331            | 335           | core promoter element around -30 of transcription start             |
| <i>CsDof2</i> | TATA-box    | 336            | 344           | core promoter element around -30 of transcription start             |
| <i>CsDof2</i> | TATA-box    | 414            | 418           | core promoter element around -30 of transcription start             |
| <i>CsDof2</i> | TATA-box    | 532            | 539           | core promoter element around -30 of transcription start             |
| <i>CsDof2</i> | TATA-box    | 533            | 539           | core promoter element around -30 of transcription start             |
| <i>CsDof2</i> | TATA-box    | 534            | 540           | core promoter element around -30 of transcription start             |
| <i>CsDof2</i> | TATA-box    | 535            | 539           | core promoter element around -30 of transcription start             |
| <i>CsDof2</i> | TATA-box    | 644            | 651           | core promoter element around -30 of transcription start             |
| <i>CsDof2</i> | TATA-box    | 645            | 651           | core promoter element around -30 of transcription start             |
| <i>CsDof2</i> | TATA-box    | 646            | 653           | core promoter element around -30 of transcription start             |
| <i>CsDof2</i> | TATA-box    | 647            | 653           | core promoter element around -30 of transcription start             |
| <i>CsDof2</i> | TATA-box    | 648            | 654           | core promoter element around -30 of transcription start             |
| <i>CsDof2</i> | TATA-box    | 649            | 653           | core promoter element around -30 of transcription start             |
| <i>CsDof2</i> | TATA-box    | 729            | 735           | core promoter element around -30 of transcription start             |
| <i>CsDof2</i> | TATA-box    | 731            | 735           | core promoter element around -30 of transcription start             |
| <i>CsDof2</i> | TATA-box    | 774            | 780           | core promoter element around -30 of transcription start             |

| Name          | Cis-element | Start position | Stop position | Function                                                            |
|---------------|-------------|----------------|---------------|---------------------------------------------------------------------|
| <i>CsDof2</i> | TATA-box    | 775            | 780           | core promoter element around -30 of transcription start             |
| <i>CsDof2</i> | TATA-box    | 776            | 780           | core promoter element around -30 of transcription start             |
| <i>CsDof2</i> | TATA-box    | 959            | 965           | core promoter element around -30 of transcription start             |
| <i>CsDof2</i> | TATA-box    | 960            | 967           | core promoter element around -30 of transcription start             |
| <i>CsDof2</i> | TATA-box    | 961            | 967           | core promoter element around -30 of transcription start             |
| <i>CsDof2</i> | TATA-box    | 962            | 968           | core promoter element around -30 of transcription start             |
| <i>CsDof2</i> | TATA-box    | 963            | 967           | core promoter element around -30 of transcription start             |
| <i>CsDof2</i> | TATA-box    | 1162           | 1166          | core promoter element around -30 of transcription start             |
| <i>CsDof2</i> | TATA-box    | 1490           | 1496          | core promoter element around -30 of transcription start             |
| <i>CsDof2</i> | TATA-box    | 1491           | 1495          | core promoter element around -30 of transcription start             |
| <i>CsDof2</i> | TATA-box    | 1516           | 1525          | core promoter element around -30 of transcription start             |
| <i>CsDof2</i> | TATA-box    | 1517           | 1524          | core promoter element around -30 of transcription start             |
| <i>CsDof2</i> | TATA-box    | 1518           | 1524          | core promoter element around -30 of transcription start             |
| <i>CsDof2</i> | TATA-box    | 1519           | 1526          | core promoter element around -30 of transcription start             |
| <i>CsDof2</i> | TATA-box    | 1520           | 1526          | core promoter element around -30 of transcription start             |
| <i>CsDof2</i> | TATA-box    | 1522           | 1526          | core promoter element around -30 of transcription start             |
| <i>CsDof2</i> | TATA-box    | 1528           | 1537          | core promoter element around -30 of transcription start             |
| <i>CsDof2</i> | TATA-box    | 1529           | 1535          | core promoter element around -30 of transcription start             |
| <i>CsDof2</i> | TATA-box    | 1530           | 1537          | core promoter element around -30 of transcription start             |
| <i>CsDof2</i> | TATA-box    | 1531           | 1537          | core promoter element around -30 of transcription start             |
| <i>CsDof2</i> | TATA-box    | 1532           | 1538          | core promoter element around -30 of transcription start             |
| <i>CsDof2</i> | TATA-box    | 1533           | 1537          | core promoter element around -30 of transcription start             |
| <i>CsDof2</i> | TATA-box    | 1655           | 1662          | core promoter element around -30 of transcription start             |
| <i>CsDof2</i> | TATA-box    | 1681           | 1687          | core promoter element around -30 of transcription start             |
| <i>CsDof2</i> | TATA-box    | 1682           | 1686          | core promoter element around -30 of transcription start             |
| <i>CsDof2</i> | TATA-box    | 1687           | 1695          | core promoter element around -30 of transcription start             |
| <i>CsDof2</i> | TATA-box    | 1765           | 1769          | core promoter element around -30 of transcription start             |
| <i>CsDof2</i> | TATA-box    | 1883           | 1890          | core promoter element around -30 of transcription start             |
| <i>CsDof2</i> | TATA-box    | 1884           | 1890          | core promoter element around -30 of transcription start             |
| <i>CsDof2</i> | TATA-box    | 1885           | 1891          | core promoter element around -30 of transcription start             |
| <i>CsDof2</i> | TATA-box    | 1886           | 1890          | core promoter element around -30 of transcription start             |
| <i>CsDof2</i> | GT1-motif   | 44             | 50            | light responsive element                                            |
| <i>CsDof2</i> | GT1-motif   | 1238           | 1244          | light responsive element                                            |
| <i>CsDof2</i> | GT1-motif   | 1395           | 1401          | light responsive element                                            |
| <i>CsDof2</i> | Sp1         | 842            | 848           | light responsive element                                            |
| <i>CsDof2</i> | MRE         | 913            | 920           | MYB binding site involved in light responsiveness                   |
| <i>CsDof3</i> | TGA-element | 1773           | 1779          | auxin-responsive element                                            |
| <i>CsDof3</i> | TATC-box    | 463            | 470           | cis-acting element involved in gibberellin-responsiveness           |
| <i>CsDof3</i> | ARE         | 591            | 597           | cis-acting regulatory element essential for the anaerobic induction |
| <i>CsDof3</i> | ARE         | 1140           | 1146          | cis-acting regulatory element essential for the anaerobic induction |
| <i>CsDof3</i> | ARE         | 1207           | 1213          | cis-acting regulatory element essential for the anaerobic induction |
| <i>CsDof3</i> | ARE         | 1543           | 1549          | cis-acting regulatory element essential for the anaerobic induction |
| <i>CsDof3</i> | circadian   | 1614           | 1623          | cis-acting regulatory element involved in circadian control         |
| <i>CsDof3</i> | CAAT-box    | 25             | 30            | common cis-acting element in promoter and enhancer regions          |
| <i>CsDof3</i> | CAAT-box    | 38             | 43            | common cis-acting element in promoter and enhancer regions          |
| <i>CsDof3</i> | CAAT-box    | 44             | 49            | common cis-acting element in promoter and enhancer regions          |
| <i>CsDof3</i> | CAAT-box    | 229            | 234           | common cis-acting element in promoter and enhancer regions          |
| <i>CsDof3</i> | CAAT-box    | 315            | 320           | common cis-acting element in promoter and enhancer regions          |
| <i>CsDof3</i> | CAAT-box    | 481            | 489           | common cis-acting element in promoter and enhancer regions          |
| <i>CsDof3</i> | CAAT-box    | 483            | 488           | common cis-acting element in promoter and enhancer regions          |
| <i>CsDof3</i> | CAAT-box    | 537            | 542           | common cis-acting element in promoter and enhancer regions          |

| Name          | Cis-element | Start position | Stop position | Function                                                   |
|---------------|-------------|----------------|---------------|------------------------------------------------------------|
| <i>CsDof3</i> | CAAT-box    | 588            | 593           | common cis-acting element in promoter and enhancer regions |
| <i>CsDof3</i> | CAAT-box    | 982            | 987           | common cis-acting element in promoter and enhancer regions |
| <i>CsDof3</i> | CAAT-box    | 1021           | 1026          | common cis-acting element in promoter and enhancer regions |
| <i>CsDof3</i> | CAAT-box    | 1489           | 1494          | common cis-acting element in promoter and enhancer regions |
| <i>CsDof3</i> | CAAT-box    | 1627           | 1632          | common cis-acting element in promoter and enhancer regions |
| <i>CsDof3</i> | CAAT-box    | 1732           | 1737          | common cis-acting element in promoter and enhancer regions |
| <i>CsDof3</i> | CAAT-box    | 1857           | 1862          | common cis-acting element in promoter and enhancer regions |
| <i>CsDof3</i> | CAAT-box    | 1878           | 1883          | common cis-acting element in promoter and enhancer regions |
| <i>CsDof3</i> | TATA-box    | 134            | 138           | core promoter element around -30 of transcription start    |
| <i>CsDof3</i> | TATA-box    | 237            | 243           | core promoter element around -30 of transcription start    |
| <i>CsDof3</i> | TATA-box    | 238            | 243           | core promoter element around -30 of transcription start    |
| <i>CsDof3</i> | TATA-box    | 239            | 243           | core promoter element around -30 of transcription start    |
| <i>CsDof3</i> | TATA-box    | 284            | 296           | core promoter element around -30 of transcription start    |
| <i>CsDof3</i> | TATA-box    | 292            | 298           | core promoter element around -30 of transcription start    |
| <i>CsDof3</i> | TATA-box    | 293            | 297           | core promoter element around -30 of transcription start    |
| <i>CsDof3</i> | TATA-box    | 321            | 328           | core promoter element around -30 of transcription start    |
| <i>CsDof3</i> | TATA-box    | 322            | 328           | core promoter element around -30 of transcription start    |
| <i>CsDof3</i> | TATA-box    | 323            | 328           | core promoter element around -30 of transcription start    |
| <i>CsDof3</i> | TATA-box    | 324            | 328           | core promoter element around -30 of transcription start    |
| <i>CsDof3</i> | TATA-box    | 326            | 334           | core promoter element around -30 of transcription start    |
| <i>CsDof3</i> | TATA-box    | 333            | 339           | core promoter element around -30 of transcription start    |
| <i>CsDof3</i> | TATA-box    | 334            | 339           | core promoter element around -30 of transcription start    |
| <i>CsDof3</i> | TATA-box    | 335            | 339           | core promoter element around -30 of transcription start    |
| <i>CsDof3</i> | TATA-box    | 350            | 354           | core promoter element around -30 of transcription start    |
| <i>CsDof3</i> | TATA-box    | 403            | 410           | core promoter element around -30 of transcription start    |
| <i>CsDof3</i> | TATA-box    | 424            | 430           | core promoter element around -30 of transcription start    |
| <i>CsDof3</i> | TATA-box    | 425            | 429           | core promoter element around -30 of transcription start    |
| <i>CsDof3</i> | TATA-box    | 495            | 501           | core promoter element around -30 of transcription start    |
| <i>CsDof3</i> | TATA-box    | 496            | 501           | core promoter element around -30 of transcription start    |
| <i>CsDof3</i> | TATA-box    | 497            | 501           | core promoter element around -30 of transcription start    |
| <i>CsDof3</i> | TATA-box    | 508            | 512           | core promoter element around -30 of transcription start    |
| <i>CsDof3</i> | TATA-box    | 614            | 622           | core promoter element around -30 of transcription start    |
| <i>CsDof3</i> | TATA-box    | 644            | 652           | core promoter element around -30 of transcription start    |
| <i>CsDof3</i> | TATA-box    | 679            | 685           | core promoter element around -30 of transcription start    |
| <i>CsDof3</i> | TATA-box    | 680            | 685           | core promoter element around -30 of transcription start    |
| <i>CsDof3</i> | TATA-box    | 681            | 685           | core promoter element around -30 of transcription start    |
| <i>CsDof3</i> | TATA-box    | 720            | 726           | core promoter element around -30 of transcription start    |
| <i>CsDof3</i> | TATA-box    | 721            | 725           | core promoter element around -30 of transcription start    |
| <i>CsDof3</i> | TATA-box    | 752            | 759           | core promoter element around -30 of transcription start    |
| <i>CsDof3</i> | TATA-box    | 753            | 759           | core promoter element around -30 of transcription start    |
| <i>CsDof3</i> | TATA-box    | 755            | 759           | core promoter element around -30 of transcription start    |
| <i>CsDof3</i> | TATA-box    | 778            | 787           | core promoter element around -30 of transcription start    |
| <i>CsDof3</i> | TATA-box    | 779            | 786           | core promoter element around -30 of transcription start    |
| <i>CsDof3</i> | TATA-box    | 780            | 786           | core promoter element around -30 of transcription start    |
| <i>CsDof3</i> | TATA-box    | 781            | 788           | core promoter element around -30 of transcription start    |
| <i>CsDof3</i> | TATA-box    | 782            | 788           | core promoter element around -30 of transcription start    |
| <i>CsDof3</i> | TATA-box    | 783            | 789           | core promoter element around -30 of transcription start    |
| <i>CsDof3</i> | TATA-box    | 784            | 788           | core promoter element around -30 of transcription start    |
| <i>CsDof3</i> | TATA-box    | 918            | 924           | core promoter element around -30 of transcription start    |
| <i>CsDof3</i> | TATA-box    | 919            | 924           | core promoter element around -30 of transcription start    |
| <i>CsDof3</i> | TATA-box    | 920            | 924           | core promoter element around -30 of transcription start    |

| Name          | Cis-element      | Start position | Stop position | Function                                                              |
|---------------|------------------|----------------|---------------|-----------------------------------------------------------------------|
| <i>CsDof3</i> | TATA-box         | 931            | 937           | core promoter element around -30 of transcription start               |
| <i>CsDof3</i> | TATA-box         | 932            | 939           | core promoter element around -30 of transcription start               |
| <i>CsDof3</i> | TATA-box         | 933            | 939           | core promoter element around -30 of transcription start               |
| <i>CsDof3</i> | TATA-box         | 935            | 939           | core promoter element around -30 of transcription start               |
| <i>CsDof3</i> | TATA-box         | 955            | 962           | core promoter element around -30 of transcription start               |
| <i>CsDof3</i> | TATA-box         | 956            | 962           | core promoter element around -30 of transcription start               |
| <i>CsDof3</i> | TATA-box         | 957            | 962           | core promoter element around -30 of transcription start               |
| <i>CsDof3</i> | TATA-box         | 958            | 962           | core promoter element around -30 of transcription start               |
| <i>CsDof3</i> | TATA-box         | 962            | 968           | core promoter element around -30 of transcription start               |
| <i>CsDof3</i> | TATA-box         | 963            | 968           | core promoter element around -30 of transcription start               |
| <i>CsDof3</i> | TATA-box         | 964            | 968           | core promoter element around -30 of transcription start               |
| <i>CsDof3</i> | TATA-box         | 996            | 1004          | core promoter element around -30 of transcription start               |
| <i>CsDof3</i> | TATA-box         | 998            | 1006          | core promoter element around -30 of transcription start               |
| <i>CsDof3</i> | TATA-box         | 1012           | 1017          | core promoter element around -30 of transcription start               |
| <i>CsDof3</i> | TATA-box         | 1013           | 1017          | core promoter element around -30 of transcription start               |
| <i>CsDof3</i> | TATA-box         | 1034           | 1038          | core promoter element around -30 of transcription start               |
| <i>CsDof3</i> | TATA-box         | 1063           | 1068          | core promoter element around -30 of transcription start               |
| <i>CsDof3</i> | TATA-box         | 1064           | 1068          | core promoter element around -30 of transcription start               |
| <i>CsDof3</i> | TATA-box         | 1246           | 1258          | core promoter element around -30 of transcription start               |
| <i>CsDof3</i> | TATA-box         | 1255           | 1259          | core promoter element around -30 of transcription start               |
| <i>CsDof3</i> | TATA-box         | 1288           | 1294          | core promoter element around -30 of transcription start               |
| <i>CsDof3</i> | TATA-box         | 1289           | 1293          | core promoter element around -30 of transcription start               |
| <i>CsDof3</i> | TATA-box         | 1316           | 1322          | core promoter element around -30 of transcription start               |
| <i>CsDof3</i> | TATA-box         | 1317           | 1322          | core promoter element around -30 of transcription start               |
| <i>CsDof3</i> | TATA-box         | 1318           | 1322          | core promoter element around -30 of transcription start               |
| <i>CsDof3</i> | TATA-box         | 1637           | 1645          | core promoter element around -30 of transcription start               |
| <i>CsDof3</i> | TATA-box         | 1787           | 1791          | core promoter element around -30 of transcription start               |
| <i>CsDof3</i> | TATA-box         | 1889           | 1898          | core promoter element around -30 of transcription start               |
| <i>CsDof3</i> | TATA-box         | 1890           | 1897          | core promoter element around -30 of transcription start               |
| <i>CsDof3</i> | TATA-box         | 1891           | 1897          | core promoter element around -30 of transcription start               |
| <i>CsDof3</i> | TATA-box         | 1892           | 1897          | core promoter element around -30 of transcription start               |
| <i>CsDof3</i> | TATA-box         | 1893           | 1897          | core promoter element around -30 of transcription start               |
| <i>CsDof3</i> | TATA-box         | 1971           | 1977          | core promoter element around -30 of transcription start               |
| <i>CsDof3</i> | TATA-box         | 1972           | 1977          | core promoter element around -30 of transcription start               |
| <i>CsDof3</i> | TATA-box         | 1973           | 1977          | core promoter element around -30 of transcription start               |
| <i>CsDof3</i> | TATA-box         | 1992           | 1997          | core promoter element around -30 of transcription start               |
| <i>CsDof3</i> | TATA-box         | 1993           | 1997          | core promoter element around -30 of transcription start               |
| <i>CsDof3</i> | AT-rich sequence | 1845           | 1854          | element for maximal elicitor-mediated activation (2copies)            |
| <i>CsDof3</i> | GT1-motif        | 629            | 636           | light responsive element                                              |
| <i>CsDof3</i> | GT1-motif        | 974            | 980           | light responsive element                                              |
| <i>CsDof4</i> | ABRE             | 1700           | 1705          | abscisic acid responsiveness                                          |
| <i>CsDof4</i> | TGA-element      | 1204           | 1210          | auxin-responsive element                                              |
| <i>CsDof4</i> | LTR              | 327            | 333           | cis-acting element involved in low-temperature responsiveness         |
| <i>CsDof4</i> | LTR              | 1293           | 1299          | cis-acting element involved in low-temperature responsiveness         |
| <i>CsDof4</i> | Unnamed_1        | 360            | 371           | cis-acting element involved in phytochrome down-regulation expression |
| <i>CsDof4</i> | ARE              | 96             | 102           | cis-acting regulatory element essential for the anaerobic induction   |
| <i>CsDof4</i> | ARE              | 861            | 867           | cis-acting regulatory element essential for the anaerobic induction   |
| <i>CsDof4</i> | AuxRR-core       | 998            | 1005          | cis-acting regulatory element involved in auxin responsiveness        |
| <i>CsDof4</i> | G-Box            | 1700           | 1706          | cis-acting regulatory element involved in light responsiveness        |
| <i>CsDof4</i> | G-box            | 185            | 191           | cis-acting regulatory element involved in light responsiveness        |
| <i>CsDof4</i> | CAT-box          | 1268           | 1274          | cis-acting regulatory element related to meristem expression          |

| Name          | Cis-element | Start position | Stop position | Function                                                   |
|---------------|-------------|----------------|---------------|------------------------------------------------------------|
| <i>CsDof4</i> | CAAT-box    | 297            | 302           | common cis-acting element in promoter and enhancer regions |
| <i>CsDof4</i> | CAAT-box    | 344            | 349           | common cis-acting element in promoter and enhancer regions |
| <i>CsDof4</i> | CAAT-box    | 431            | 436           | common cis-acting element in promoter and enhancer regions |
| <i>CsDof4</i> | CAAT-box    | 437            | 442           | common cis-acting element in promoter and enhancer regions |
| <i>CsDof4</i> | CAAT-box    | 671            | 676           | common cis-acting element in promoter and enhancer regions |
| <i>CsDof4</i> | CAAT-box    | 749            | 754           | common cis-acting element in promoter and enhancer regions |
| <i>CsDof4</i> | CAAT-box    | 789            | 794           | common cis-acting element in promoter and enhancer regions |
| <i>CsDof4</i> | CAAT-box    | 868            | 873           | common cis-acting element in promoter and enhancer regions |
| <i>CsDof4</i> | CAAT-box    | 1066           | 1071          | common cis-acting element in promoter and enhancer regions |
| <i>CsDof4</i> | CAAT-box    | 1197           | 1202          | common cis-acting element in promoter and enhancer regions |
| <i>CsDof4</i> | CAAT-box    | 1260           | 1265          | common cis-acting element in promoter and enhancer regions |
| <i>CsDof4</i> | CAAT-box    | 1416           | 1421          | common cis-acting element in promoter and enhancer regions |
| <i>CsDof4</i> | CAAT-box    | 1429           | 1434          | common cis-acting element in promoter and enhancer regions |
| <i>CsDof4</i> | CAAT-box    | 1695           | 1700          | common cis-acting element in promoter and enhancer regions |
| <i>CsDof4</i> | CAAT-box    | 1710           | 1715          | common cis-acting element in promoter and enhancer regions |
| <i>CsDof4</i> | TATA-box    | 15             | 19            | core promoter element around -30 of transcription start    |
| <i>CsDof4</i> | TATA-box    | 31             | 38            | core promoter element around -30 of transcription start    |
| <i>CsDof4</i> | TATA-box    | 86             | 93            | core promoter element around -30 of transcription start    |
| <i>CsDof4</i> | TATA-box    | 209            | 213           | core promoter element around -30 of transcription start    |
| <i>CsDof4</i> | TATA-box    | 214            | 218           | core promoter element around -30 of transcription start    |
| <i>CsDof4</i> | TATA-box    | 251            | 255           | core promoter element around -30 of transcription start    |
| <i>CsDof4</i> | TATA-box    | 256            | 260           | core promoter element around -30 of transcription start    |
| <i>CsDof4</i> | TATA-box    | 410            | 416           | core promoter element around -30 of transcription start    |
| <i>CsDof4</i> | TATA-box    | 412            | 416           | core promoter element around -30 of transcription start    |
| <i>CsDof4</i> | TATA-box    | 487            | 493           | core promoter element around -30 of transcription start    |
| <i>CsDof4</i> | TATA-box    | 488            | 494           | core promoter element around -30 of transcription start    |
| <i>CsDof4</i> | TATA-box    | 489            | 495           | core promoter element around -30 of transcription start    |
| <i>CsDof4</i> | TATA-box    | 490            | 496           | core promoter element around -30 of transcription start    |
| <i>CsDof4</i> | TATA-box    | 491            | 497           | core promoter element around -30 of transcription start    |
| <i>CsDof4</i> | TATA-box    | 492            | 496           | core promoter element around -30 of transcription start    |
| <i>CsDof4</i> | TATA-box    | 540            | 546           | core promoter element around -30 of transcription start    |
| <i>CsDof4</i> | TATA-box    | 541            | 545           | core promoter element around -30 of transcription start    |
| <i>CsDof4</i> | TATA-box    | 804            | 810           | core promoter element around -30 of transcription start    |
| <i>CsDof4</i> | TATA-box    | 805            | 811           | core promoter element around -30 of transcription start    |
| <i>CsDof4</i> | TATA-box    | 806            | 812           | core promoter element around -30 of transcription start    |
| <i>CsDof4</i> | TATA-box    | 807            | 813           | core promoter element around -30 of transcription start    |
| <i>CsDof4</i> | TATA-box    | 808            | 814           | core promoter element around -30 of transcription start    |
| <i>CsDof4</i> | TATA-box    | 809            | 815           | core promoter element around -30 of transcription start    |
| <i>CsDof4</i> | TATA-box    | 810            | 816           | core promoter element around -30 of transcription start    |
| <i>CsDof4</i> | TATA-box    | 811            | 817           | core promoter element around -30 of transcription start    |
| <i>CsDof4</i> | TATA-box    | 812            | 816           | core promoter element around -30 of transcription start    |
| <i>CsDof4</i> | TATA-box    | 877            | 883           | core promoter element around -30 of transcription start    |
| <i>CsDof4</i> | TATA-box    | 878            | 882           | core promoter element around -30 of transcription start    |
| <i>CsDof4</i> | TATA-box    | 953            | 957           | core promoter element around -30 of transcription start    |
| <i>CsDof4</i> | TATA-box    | 1177           | 1181          | core promoter element around -30 of transcription start    |
| <i>CsDof4</i> | TATA-box    | 1224           | 1233          | core promoter element around -30 of transcription start    |
| <i>CsDof4</i> | TATA-box    | 1225           | 1232          | core promoter element around -30 of transcription start    |
| <i>CsDof4</i> | TATA-box    | 1226           | 1232          | core promoter element around -30 of transcription start    |
| <i>CsDof4</i> | TATA-box    | 1227           | 1234          | core promoter element around -30 of transcription start    |
| <i>CsDof4</i> | TATA-box    | 1228           | 1234          | core promoter element around -30 of transcription start    |
| <i>CsDof4</i> | TATA-box    | 1229           | 1235          | core promoter element around -30 of transcription start    |

| Name          | Cis-element      | Start position | Stop position | Function                                                             |
|---------------|------------------|----------------|---------------|----------------------------------------------------------------------|
| <i>CsDof4</i> | TATA-box         | 1230           | 1236          | core promoter element around -30 of transcription start              |
| <i>CsDof4</i> | TATA-box         | 1231           | 1237          | core promoter element around -30 of transcription start              |
| <i>CsDof4</i> | TATA-box         | 1232           | 1236          | core promoter element around -30 of transcription start              |
| <i>CsDof4</i> | TATA-box         | 1301           | 1305          | core promoter element around -30 of transcription start              |
| <i>CsDof4</i> | TATA-box         | 1306           | 1311          | core promoter element around -30 of transcription start              |
| <i>CsDof4</i> | TATA-box         | 1307           | 1311          | core promoter element around -30 of transcription start              |
| <i>CsDof4</i> | TATA-box         | 1346           | 1352          | core promoter element around -30 of transcription start              |
| <i>CsDof4</i> | TATA-box         | 1347           | 1351          | core promoter element around -30 of transcription start              |
| <i>CsDof4</i> | TATA-box         | 1397           | 1403          | core promoter element around -30 of transcription start              |
| <i>CsDof4</i> | TATA-box         | 1398           | 1403          | core promoter element around -30 of transcription start              |
| <i>CsDof4</i> | TATA-box         | 1399           | 1403          | core promoter element around -30 of transcription start              |
| <i>CsDof4</i> | TATA-box         | 1412           | 1416          | core promoter element around -30 of transcription start              |
| <i>CsDof4</i> | TATA-box         | 1443           | 1451          | core promoter element around -30 of transcription start              |
| <i>CsDof4</i> | TATA-box         | 1568           | 1574          | core promoter element around -30 of transcription start              |
| <i>CsDof4</i> | TATA-box         | 1569           | 1574          | core promoter element around -30 of transcription start              |
| <i>CsDof4</i> | TATA-box         | 1570           | 1574          | core promoter element around -30 of transcription start              |
| <i>CsDof4</i> | TATA-box         | 1657           | 1663          | core promoter element around -30 of transcription start              |
| <i>CsDof4</i> | TATA-box         | 1658           | 1665          | core promoter element around -30 of transcription start              |
| <i>CsDof4</i> | TATA-box         | 1659           | 1665          | core promoter element around -30 of transcription start              |
| <i>CsDof4</i> | TATA-box         | 1660           | 1666          | core promoter element around -30 of transcription start              |
| <i>CsDof4</i> | TATA-box         | 1661           | 1665          | core promoter element around -30 of transcription start              |
| <i>CsDof4</i> | TATA-box         | 1838           | 1844          | core promoter element around -30 of transcription start              |
| <i>CsDof4</i> | TATA-box         | 1840           | 1846          | core promoter element around -30 of transcription start              |
| <i>CsDof4</i> | TATA-box         | 1841           | 1847          | core promoter element around -30 of transcription start              |
| <i>CsDof4</i> | TATA-box         | 1842           | 1848          | core promoter element around -30 of transcription start              |
| <i>CsDof4</i> | TATA-box         | 1844           | 1848          | core promoter element around -30 of transcription start              |
| <i>CsDof4</i> | TATA-box         | 1942           | 1948          | core promoter element around -30 of transcription start              |
| <i>CsDof4</i> | TATA-box         | 1943           | 1947          | core promoter element around -30 of transcription start              |
| <i>CsDof4</i> | AT-rich sequence | 566            | 575           | element for maximal elicitor-mediated activation (2copies)           |
| <i>CsDof4</i> | P-box            | 1864           | 1871          | gibberellin-responsive element                                       |
| <i>CsDof4</i> | GT1-motif        | 622            | 628           | light responsive element                                             |
| <i>CsDof4</i> | GT1-motif        | 1246           | 1252          | light responsive element                                             |
| <i>CsDof4</i> | MBS              | 592            | 598           | MYB binding site involved in drought-inducibility                    |
| <i>CsDof4</i> | CCAAT-box        | 1057           | 1063          | MYBHv1 binding site                                                  |
| <i>CsDof5</i> | ABRE             | 1220           | 1225          | abscisic acid responsiveness                                         |
| <i>CsDof5</i> | ABRE             | 1593           | 1599          | abscisic acid responsiveness                                         |
| <i>CsDof5</i> | ABRE             | 1594           | 1599          | abscisic acid responsiveness                                         |
| <i>CsDof5</i> | TGA-element      | 485            | 491           | auxin-responsive element                                             |
| <i>CsDof5</i> | LTR              | 1766           | 1772          | cis-acting element involved in low-temperature responsiveness        |
| <i>CsDof5</i> | ARE              | 31             | 37            | cis-acting regulatory element essential for the anaerobic induction  |
| <i>CsDof5</i> | ARE              | 408            | 414           | cis-acting regulatory element essential for the anaerobic induction  |
| <i>CsDof5</i> | ARE              | 986            | 992           | cis-acting regulatory element essential for the anaerobic induction  |
| <i>CsDof5</i> | G-Box            | 1220           | 1226          | cis-acting regulatory element involved in light responsiveness       |
| <i>CsDof5</i> | G-Box            | 1593           | 1599          | cis-acting regulatory element involved in light responsiveness       |
| <i>CsDof5</i> | G-box            | 1593           | 1599          | cis-acting regulatory element involved in light responsiveness       |
| <i>CsDof5</i> | TGACG-motif      | 1569           | 1574          | cis-acting regulatory element involved in the MeJA-responsiveness    |
| <i>CsDof5</i> | TGACG-motif      | 1748           | 1753          | cis-acting regulatory element involved in the MeJA-responsiveness    |
| <i>CsDof5</i> | CGTCA-motif      | 1569           | 1574          | cis-acting regulatory element involved in the MeJA-responsiveness    |
| <i>CsDof5</i> | CGTCA-motif      | 1748           | 1753          | cis-acting regulatory element involved in the MeJA-responsiveness    |
| <i>CsDof5</i> | O2-site          | 1313           | 1322          | cis-acting regulatory element involved in zein metabolism regulation |
| <i>CsDof5</i> | CAAT-box         | 235            | 240           | common cis-acting element in promoter and enhancer regions           |



| <b>Name</b>   | <b>Cis-element</b> | <b>Start position</b> | <b>Stop position</b> | <b>Function</b>                                            |
|---------------|--------------------|-----------------------|----------------------|------------------------------------------------------------|
| <i>CsDof5</i> | CAAT-box           | 333                   | 338                  | common cis-acting element in promoter and enhancer regions |
| <i>CsDof5</i> | CAAT-box           | 609                   | 614                  | common cis-acting element in promoter and enhancer regions |
| <i>CsDof5</i> | CAAT-box           | 617                   | 622                  | common cis-acting element in promoter and enhancer regions |
| <i>CsDof5</i> | CAAT-box           | 703                   | 708                  | common cis-acting element in promoter and enhancer regions |
| <i>CsDof5</i> | CAAT-box           | 780                   | 785                  | common cis-acting element in promoter and enhancer regions |
| <i>CsDof5</i> | CAAT-box           | 841                   | 846                  | common cis-acting element in promoter and enhancer regions |
| <i>CsDof5</i> | CAAT-box           | 1004                  | 1009                 | common cis-acting element in promoter and enhancer regions |
| <i>CsDof5</i> | CAAT-box           | 1554                  | 1559                 | common cis-acting element in promoter and enhancer regions |
| <i>CsDof5</i> | CAAT-box           | 1573                  | 1578                 | common cis-acting element in promoter and enhancer regions |
| <i>CsDof5</i> | CAAT-box           | 1636                  | 1641                 | common cis-acting element in promoter and enhancer regions |
| <i>CsDof5</i> | CAAT-box           | 1752                  | 1757                 | common cis-acting element in promoter and enhancer regions |
| <i>CsDof5</i> | CAAT-box           | 1784                  | 1789                 | common cis-acting element in promoter and enhancer regions |
| <i>CsDof5</i> | TATA-box           | 36                    | 44                   | core promoter element around -30 of transcription start    |
| <i>CsDof5</i> | TATA-box           | 40                    | 46                   | core promoter element around -30 of transcription start    |
| <i>CsDof5</i> | TATA-box           | 42                    | 46                   | core promoter element around -30 of transcription start    |
| <i>CsDof5</i> | TATA-box           | 75                    | 81                   | core promoter element around -30 of transcription start    |
| <i>CsDof5</i> | TATA-box           | 76                    | 81                   | core promoter element around -30 of transcription start    |
| <i>CsDof5</i> | TATA-box           | 77                    | 81                   | core promoter element around -30 of transcription start    |
| <i>CsDof5</i> | TATA-box           | 141                   | 145                  | core promoter element around -30 of transcription start    |
| <i>CsDof5</i> | TATA-box           | 227                   | 231                  | core promoter element around -30 of transcription start    |
| <i>CsDof5</i> | TATA-box           | 288                   | 292                  | core promoter element around -30 of transcription start    |
| <i>CsDof5</i> | TATA-box           | 531                   | 537                  | core promoter element around -30 of transcription start    |
| <i>CsDof5</i> | TATA-box           | 532                   | 537                  | core promoter element around -30 of transcription start    |
| <i>CsDof5</i> | TATA-box           | 533                   | 537                  | core promoter element around -30 of transcription start    |
| <i>CsDof5</i> | TATA-box           | 707                   | 711                  | core promoter element around -30 of transcription start    |
| <i>CsDof5</i> | TATA-box           | 1204                  | 1208                 | core promoter element around -30 of transcription start    |
| <i>CsDof5</i> | TATA-box           | 1254                  | 1258                 | core promoter element around -30 of transcription start    |
| <i>CsDof5</i> | TATA-box           | 1347                  | 1356                 | core promoter element around -30 of transcription start    |
| <i>CsDof5</i> | TATA-box           | 1639                  | 1645                 | core promoter element around -30 of transcription start    |
| <i>CsDof5</i> | TATA-box           | 1640                  | 1644                 | core promoter element around -30 of transcription start    |
| <i>CsDof5</i> | TATA-box           | 1773                  | 1779                 | core promoter element around -30 of transcription start    |
| <i>CsDof5</i> | TATA-box           | 1775                  | 1781                 | core promoter element around -30 of transcription start    |
| <i>CsDof5</i> | TATA-box           | 1776                  | 1782                 | core promoter element around -30 of transcription start    |
| <i>CsDof5</i> | TATA-box           | 1777                  | 1781                 | core promoter element around -30 of transcription start    |
| <i>CsDof5</i> | TATA-box           | 1901                  | 1909                 | core promoter element around -30 of transcription start    |
| <i>CsDof5</i> | TATA-box           | 1915                  | 1924                 | core promoter element around -30 of transcription start    |
| <i>CsDof5</i> | TATA-box           | 1916                  | 1923                 | core promoter element around -30 of transcription start    |
| <i>CsDof5</i> | TATA-box           | 1917                  | 1923                 | core promoter element around -30 of transcription start    |
| <i>CsDof5</i> | TATA-box           | 1918                  | 1925                 | core promoter element around -30 of transcription start    |
| <i>CsDof5</i> | TATA-box           | 1919                  | 1925                 | core promoter element around -30 of transcription start    |
| <i>CsDof5</i> | TATA-box           | 1921                  | 1925                 | core promoter element around -30 of transcription start    |
| <i>CsDof5</i> | TATA-box           | 1927                  | 1933                 | core promoter element around -30 of transcription start    |
| <i>CsDof5</i> | TATA-box           | 1928                  | 1934                 | core promoter element around -30 of transcription start    |
| <i>CsDof5</i> | TATA-box           | 1929                  | 1935                 | core promoter element around -30 of transcription start    |
| <i>CsDof5</i> | TATA-box           | 1930                  | 1936                 | core promoter element around -30 of transcription start    |
| <i>CsDof5</i> | TATA-box           | 1931                  | 1937                 | core promoter element around -30 of transcription start    |
| <i>CsDof5</i> | TATA-box           | 1932                  | 1938                 | core promoter element around -30 of transcription start    |
| <i>CsDof5</i> | TATA-box           | 1933                  | 1939                 | core promoter element around -30 of transcription start    |
| <i>CsDof5</i> | TATA-box           | 1934                  | 1940                 | core promoter element around -30 of transcription start    |
| <i>CsDof5</i> | TATA-box           | 1935                  | 1941                 | core promoter element around -30 of transcription start    |
| <i>CsDof5</i> | TATA-box           | 1936                  | 1942                 | core promoter element around -30 of transcription start    |

| Name          | Cis-element     | Start position | Stop position | Function                                                             |
|---------------|-----------------|----------------|---------------|----------------------------------------------------------------------|
| <i>CsDof5</i> | TATA-box        | 1937           | 1943          | core promoter element around -30 of transcription start              |
| <i>CsDof5</i> | TATA-box        | 1938           | 1944          | core promoter element around -30 of transcription start              |
| <i>CsDof5</i> | TATA-box        | 1939           | 1945          | core promoter element around -30 of transcription start              |
| <i>CsDof5</i> | TATA-box        | 1940           | 1946          | core promoter element around -30 of transcription start              |
| <i>CsDof5</i> | TATA-box        | 1941           | 1947          | core promoter element around -30 of transcription start              |
| <i>CsDof5</i> | TATA-box        | 1942           | 1948          | core promoter element around -30 of transcription start              |
| <i>CsDof5</i> | TATA-box        | 1943           | 1949          | core promoter element around -30 of transcription start              |
| <i>CsDof5</i> | TATA-box        | 1944           | 1950          | core promoter element around -30 of transcription start              |
| <i>CsDof5</i> | TATA-box        | 1945           | 1951          | core promoter element around -30 of transcription start              |
| <i>CsDof5</i> | TATA-box        | 1946           | 1952          | core promoter element around -30 of transcription start              |
| <i>CsDof5</i> | TATA-box        | 1947           | 1953          | core promoter element around -30 of transcription start              |
| <i>CsDof5</i> | TATA-box        | 1948           | 1954          | core promoter element around -30 of transcription start              |
| <i>CsDof5</i> | TATA-box        | 1949           | 1955          | core promoter element around -30 of transcription start              |
| <i>CsDof5</i> | TATA-box        | 1950           | 1956          | core promoter element around -30 of transcription start              |
| <i>CsDof5</i> | TATA-box        | 1951           | 1957          | core promoter element around -30 of transcription start              |
| <i>CsDof5</i> | TATA-box        | 1952           | 1958          | core promoter element around -30 of transcription start              |
| <i>CsDof5</i> | TATA-box        | 1954           | 1958          | core promoter element around -30 of transcription start              |
| <i>CsDof5</i> | TATA-box        | 1989           | 1998          | core promoter element around -30 of transcription start              |
| <i>CsDof5</i> | TATA-box        | 1990           | 1997          | core promoter element around -30 of transcription start              |
| <i>CsDof5</i> | TATA-box        | 1991           | 1997          | core promoter element around -30 of transcription start              |
| <i>CsDof5</i> | TATA-box        | 1992           | 1997          | core promoter element around -30 of transcription start              |
| <i>CsDof5</i> | TATA-box        | 1993           | 1997          | core promoter element around -30 of transcription start              |
| <i>CsDof5</i> | GARE-motif      | 1415           | 1422          | gibberellin-responsive element                                       |
| <i>CsDof5</i> | MRE             | 340            | 347           | MYB binding site involved in light responsiveness                    |
| <i>CsDof6</i> | ABRE            | 879            | 884           | abscisic acid responsiveness                                         |
| <i>CsDof6</i> | ABRE            | 1025           | 1030          | abscisic acid responsiveness                                         |
| <i>CsDof6</i> | ABRE            | 1353           | 1358          | abscisic acid responsiveness                                         |
| <i>CsDof6</i> | TC-rich repeats | 739            | 748           | cis-acting element involved in defense and stress responsiveness     |
| <i>CsDof6</i> | TCA-element     | 527            | 536           | cis-acting element involved in salicylic acid responsiveness         |
| <i>CsDof6</i> | ARE             | 171            | 177           | cis-acting regulatory element essential for the anaerobic induction  |
| <i>CsDof6</i> | ARE             | 626            | 632           | cis-acting regulatory element essential for the anaerobic induction  |
| <i>CsDof6</i> | ARE             | 1284           | 1290          | cis-acting regulatory element essential for the anaerobic induction  |
| <i>CsDof6</i> | ARE             | 1507           | 1513          | cis-acting regulatory element essential for the anaerobic induction  |
| <i>CsDof6</i> | ARE             | 1878           | 1884          | cis-acting regulatory element essential for the anaerobic induction  |
| <i>CsDof6</i> | G-box           | 878            | 884           | cis-acting regulatory element involved in light responsiveness       |
| <i>CsDof6</i> | G-box           | 1025           | 1031          | cis-acting regulatory element involved in light responsiveness       |
| <i>CsDof6</i> | G-box           | 1353           | 1359          | cis-acting regulatory element involved in light responsiveness       |
| <i>CsDof6</i> | CGTCA-motif     | 474            | 479           | cis-acting regulatory element involved in the MeJA-responsiveness    |
| <i>CsDof6</i> | CGTCA-motif     | 877            | 882           | cis-acting regulatory element involved in the MeJA-responsiveness    |
| <i>CsDof6</i> | TGACG-motif     | 474            | 479           | cis-acting regulatory element involved in the MeJA-responsiveness    |
| <i>CsDof6</i> | TGACG-motif     | 877            | 882           | cis-acting regulatory element involved in the MeJA-responsiveness    |
| <i>CsDof6</i> | O2-site         | 535            | 544           | cis-acting regulatory element involved in zein metabolism regulation |
| <i>CsDof6</i> | O2-site         | 875            | 884           | cis-acting regulatory element involved in zein metabolism regulation |
| <i>CsDof6</i> | O2-site         | 1817           | 1826          | cis-acting regulatory element involved in zein metabolism regulation |
| <i>CsDof6</i> | CAAT-box        | 30             | 35            | common cis-acting element in promoter and enhancer regions           |
| <i>CsDof6</i> | CAAT-box        | 169            | 174           | common cis-acting element in promoter and enhancer regions           |
| <i>CsDof6</i> | CAAT-box        | 257            | 262           | common cis-acting element in promoter and enhancer regions           |
| <i>CsDof6</i> | CAAT-box        | 283            | 288           | common cis-acting element in promoter and enhancer regions           |
| <i>CsDof6</i> | CAAT-box        | 310            | 315           | common cis-acting element in promoter and enhancer regions           |
| <i>CsDof6</i> | CAAT-box        | 382            | 387           | common cis-acting element in promoter and enhancer regions           |
| <i>CsDof6</i> | CAAT-box        | 492            | 497           | common cis-acting element in promoter and enhancer regions           |

| Name          | Cis-element | Start position | Stop position | Function                                                   |
|---------------|-------------|----------------|---------------|------------------------------------------------------------|
| <i>CsDof6</i> | CAAT-box    | 603            | 612           | common cis-acting element in promoter and enhancer regions |
| <i>CsDof6</i> | CAAT-box    | 605            | 610           | common cis-acting element in promoter and enhancer regions |
| <i>CsDof6</i> | CAAT-box    | 1137           | 1142          | common cis-acting element in promoter and enhancer regions |
| <i>CsDof6</i> | CAAT-box    | 1267           | 1272          | common cis-acting element in promoter and enhancer regions |
| <i>CsDof6</i> | CAAT-box    | 1309           | 1314          | common cis-acting element in promoter and enhancer regions |
| <i>CsDof6</i> | CAAT-box    | 1338           | 1343          | common cis-acting element in promoter and enhancer regions |
| <i>CsDof6</i> | CAAT-box    | 1451           | 1456          | common cis-acting element in promoter and enhancer regions |
| <i>CsDof6</i> | CAAT-box    | 1458           | 1463          | common cis-acting element in promoter and enhancer regions |
| <i>CsDof6</i> | CAAT-box    | 1510           | 1515          | common cis-acting element in promoter and enhancer regions |
| <i>CsDof6</i> | CAAT-box    | 1653           | 1658          | common cis-acting element in promoter and enhancer regions |
| <i>CsDof6</i> | CAAT-box    | 1680           | 1685          | common cis-acting element in promoter and enhancer regions |
| <i>CsDof6</i> | CAAT-box    | 1861           | 1866          | common cis-acting element in promoter and enhancer regions |
| <i>CsDof6</i> | CAAT-box    | 1892           | 1897          | common cis-acting element in promoter and enhancer regions |
| <i>CsDof6</i> | CAAT-box    | 1978           | 1983          | common cis-acting element in promoter and enhancer regions |
| <i>CsDof6</i> | TATA-box    | 128            | 133           | core promoter element around -30 of transcription start    |
| <i>CsDof6</i> | TATA-box    | 129            | 133           | core promoter element around -30 of transcription start    |
| <i>CsDof6</i> | TATA-box    | 191            | 198           | core promoter element around -30 of transcription start    |
| <i>CsDof6</i> | TATA-box    | 192            | 198           | core promoter element around -30 of transcription start    |
| <i>CsDof6</i> | TATA-box    | 193            | 198           | core promoter element around -30 of transcription start    |
| <i>CsDof6</i> | TATA-box    | 194            | 198           | core promoter element around -30 of transcription start    |
| <i>CsDof6</i> | TATA-box    | 210            | 214           | core promoter element around -30 of transcription start    |
| <i>CsDof6</i> | TATA-box    | 226            | 232           | core promoter element around -30 of transcription start    |
| <i>CsDof6</i> | TATA-box    | 227            | 233           | core promoter element around -30 of transcription start    |
| <i>CsDof6</i> | TATA-box    | 228            | 232           | core promoter element around -30 of transcription start    |
| <i>CsDof6</i> | TATA-box    | 266            | 270           | core promoter element around -30 of transcription start    |
| <i>CsDof6</i> | TATA-box    | 272            | 278           | core promoter element around -30 of transcription start    |
| <i>CsDof6</i> | TATA-box    | 273            | 279           | core promoter element around -30 of transcription start    |
| <i>CsDof6</i> | TATA-box    | 274            | 278           | core promoter element around -30 of transcription start    |
| <i>CsDof6</i> | TATA-box    | 464            | 470           | core promoter element around -30 of transcription start    |
| <i>CsDof6</i> | TATA-box    | 465            | 469           | core promoter element around -30 of transcription start    |
| <i>CsDof6</i> | TATA-box    | 629            | 635           | core promoter element around -30 of transcription start    |
| <i>CsDof6</i> | TATA-box    | 630            | 635           | core promoter element around -30 of transcription start    |
| <i>CsDof6</i> | TATA-box    | 631            | 635           | core promoter element around -30 of transcription start    |
| <i>CsDof6</i> | TATA-box    | 984            | 989           | core promoter element around -30 of transcription start    |
| <i>CsDof6</i> | TATA-box    | 985            | 989           | core promoter element around -30 of transcription start    |
| <i>CsDof6</i> | TATA-box    | 1084           | 1092          | core promoter element around -30 of transcription start    |
| <i>CsDof6</i> | TATA-box    | 1176           | 1180          | core promoter element around -30 of transcription start    |
| <i>CsDof6</i> | TATA-box    | 1264           | 1268          | core promoter element around -30 of transcription start    |
| <i>CsDof6</i> | TATA-box    | 1481           | 1485          | core promoter element around -30 of transcription start    |
| <i>CsDof6</i> | TATA-box    | 1502           | 1507          | core promoter element around -30 of transcription start    |
| <i>CsDof6</i> | TATA-box    | 1503           | 1507          | core promoter element around -30 of transcription start    |
| <i>CsDof6</i> | TATA-box    | 1516           | 1521          | core promoter element around -30 of transcription start    |
| <i>CsDof6</i> | TATA-box    | 1517           | 1521          | core promoter element around -30 of transcription start    |
| <i>CsDof6</i> | TATA-box    | 1523           | 1529          | core promoter element around -30 of transcription start    |
| <i>CsDof6</i> | TATA-box    | 1524           | 1528          | core promoter element around -30 of transcription start    |
| <i>CsDof6</i> | TATA-box    | 1538           | 1544          | core promoter element around -30 of transcription start    |
| <i>CsDof6</i> | TATA-box    | 1539           | 1544          | core promoter element around -30 of transcription start    |
| <i>CsDof6</i> | TATA-box    | 1540           | 1544          | core promoter element around -30 of transcription start    |
| <i>CsDof6</i> | TATA-box    | 1724           | 1730          | core promoter element around -30 of transcription start    |
| <i>CsDof6</i> | TATA-box    | 1725           | 1730          | core promoter element around -30 of transcription start    |
| <i>CsDof6</i> | TATA-box    | 1726           | 1730          | core promoter element around -30 of transcription start    |

| Name          | Cis-element | Start position | Stop position | Function                                                             |
|---------------|-------------|----------------|---------------|----------------------------------------------------------------------|
| <i>CsDof6</i> | TATA-box    | 1733           | 1737          | core promoter element around -30 of transcription start              |
| <i>CsDof6</i> | GARE-motif  | 327            | 334           | gibberellin-responsive element                                       |
| <i>CsDof6</i> | MBS         | 3              | 9             | MYB binding site involved in drought-inducibility                    |
| <i>CsDof6</i> | MBS         | 552            | 558           | MYB binding site involved in drought-inducibility                    |
| <i>CsDof8</i> | ABRE        | 77             | 82            | abscisic acid responsiveness                                         |
| <i>CsDof8</i> | TCA-element | 638            | 647           | cis-acting element involved in salicylic acid responsiveness         |
| <i>CsDof8</i> | TCA-element | 1191           | 1200          | cis-acting element involved in salicylic acid responsiveness         |
| <i>CsDof8</i> | ARE         | 1087           | 1093          | cis-acting regulatory element essential for the anaerobic induction  |
| <i>CsDof8</i> | G-box       | 77             | 83            | cis-acting regulatory element involved in light responsiveness       |
| <i>CsDof8</i> | TGACG-motif | 931            | 936           | cis-acting regulatory element involved in the MeJA-responsiveness    |
| <i>CsDof8</i> | TGACG-motif | 1621           | 1626          | cis-acting regulatory element involved in the MeJA-responsiveness    |
| <i>CsDof8</i> | CGTCA-motif | 931            | 936           | cis-acting regulatory element involved in the MeJA-responsiveness    |
| <i>CsDof8</i> | CGTCA-motif | 1621           | 1626          | cis-acting regulatory element involved in the MeJA-responsiveness    |
| <i>CsDof8</i> | O2-site     | 1985           | 1994          | cis-acting regulatory element involved in zein metabolism regulation |
| <i>CsDof8</i> | CAT-box     | 1327           | 1333          | cis-acting regulatory element related to meristem expression         |
| <i>CsDof8</i> | CAAT-box    | 48             | 53            | common cis-acting element in promoter and enhancer regions           |
| <i>CsDof8</i> | CAAT-box    | 127            | 132           | common cis-acting element in promoter and enhancer regions           |
| <i>CsDof8</i> | CAAT-box    | 133            | 138           | common cis-acting element in promoter and enhancer regions           |
| <i>CsDof8</i> | CAAT-box    | 349            | 354           | common cis-acting element in promoter and enhancer regions           |
| <i>CsDof8</i> | CAAT-box    | 674            | 679           | common cis-acting element in promoter and enhancer regions           |
| <i>CsDof8</i> | CAAT-box    | 694            | 699           | common cis-acting element in promoter and enhancer regions           |
| <i>CsDof8</i> | CAAT-box    | 731            | 736           | common cis-acting element in promoter and enhancer regions           |
| <i>CsDof8</i> | CAAT-box    | 860            | 865           | common cis-acting element in promoter and enhancer regions           |
| <i>CsDof8</i> | CAAT-box    | 867            | 872           | common cis-acting element in promoter and enhancer regions           |
| <i>CsDof8</i> | CAAT-box    | 912            | 917           | common cis-acting element in promoter and enhancer regions           |
| <i>CsDof8</i> | CAAT-box    | 936            | 941           | common cis-acting element in promoter and enhancer regions           |
| <i>CsDof8</i> | CAAT-box    | 1077           | 1082          | common cis-acting element in promoter and enhancer regions           |
| <i>CsDof8</i> | CAAT-box    | 1162           | 1167          | common cis-acting element in promoter and enhancer regions           |
| <i>CsDof8</i> | CAAT-box    | 1266           | 1271          | common cis-acting element in promoter and enhancer regions           |
| <i>CsDof8</i> | CAAT-box    | 1582           | 1587          | common cis-acting element in promoter and enhancer regions           |
| <i>CsDof8</i> | TATA-box    | 28             | 35            | core promoter element around -30 of transcription start              |
| <i>CsDof8</i> | TATA-box    | 217            | 223           | core promoter element around -30 of transcription start              |
| <i>CsDof8</i> | TATA-box    | 218            | 224           | core promoter element around -30 of transcription start              |
| <i>CsDof8</i> | TATA-box    | 219            | 225           | core promoter element around -30 of transcription start              |
| <i>CsDof8</i> | TATA-box    | 220            | 224           | core promoter element around -30 of transcription start              |
| <i>CsDof8</i> | TATA-box    | 288            | 292           | core promoter element around -30 of transcription start              |
| <i>CsDof8</i> | TATA-box    | 306            | 312           | core promoter element around -30 of transcription start              |
| <i>CsDof8</i> | TATA-box    | 307            | 312           | core promoter element around -30 of transcription start              |
| <i>CsDof8</i> | TATA-box    | 308            | 312           | core promoter element around -30 of transcription start              |
| <i>CsDof8</i> | TATA-box    | 322            | 328           | core promoter element around -30 of transcription start              |
| <i>CsDof8</i> | TATA-box    | 323            | 330           | core promoter element around -30 of transcription start              |
| <i>CsDof8</i> | TATA-box    | 324            | 330           | core promoter element around -30 of transcription start              |
| <i>CsDof8</i> | TATA-box    | 326            | 330           | core promoter element around -30 of transcription start              |
| <i>CsDof8</i> | TATA-box    | 356            | 362           | core promoter element around -30 of transcription start              |
| <i>CsDof8</i> | TATA-box    | 357            | 364           | core promoter element around -30 of transcription start              |
| <i>CsDof8</i> | TATA-box    | 358            | 364           | core promoter element around -30 of transcription start              |
| <i>CsDof8</i> | TATA-box    | 360            | 364           | core promoter element around -30 of transcription start              |
| <i>CsDof8</i> | TATA-box    | 380            | 386           | core promoter element around -30 of transcription start              |
| <i>CsDof8</i> | TATA-box    | 381            | 386           | core promoter element around -30 of transcription start              |
| <i>CsDof8</i> | TATA-box    | 382            | 386           | core promoter element around -30 of transcription start              |
| <i>CsDof8</i> | TATA-box    | 451            | 459           | core promoter element around -30 of transcription start              |



| Name          | Cis-element | Start position | Stop position | Function                                                             |
|---------------|-------------|----------------|---------------|----------------------------------------------------------------------|
| <i>CsDof8</i> | TATA-box    | 1718           | 1722          | core promoter element around -30 of transcription start              |
| <i>CsDof8</i> | TATA-box    | 1738           | 1746          | core promoter element around -30 of transcription start              |
| <i>CsDof8</i> | TATA-box    | 1743           | 1749          | core promoter element around -30 of transcription start              |
| <i>CsDof8</i> | TATA-box    | 1744           | 1750          | core promoter element around -30 of transcription start              |
| <i>CsDof8</i> | TATA-box    | 1745           | 1751          | core promoter element around -30 of transcription start              |
| <i>CsDof8</i> | TATA-box    | 1746           | 1750          | core promoter element around -30 of transcription start              |
| <i>CsDof8</i> | TATA-box    | 1789           | 1795          | core promoter element around -30 of transcription start              |
| <i>CsDof8</i> | TATA-box    | 1790           | 1796          | core promoter element around -30 of transcription start              |
| <i>CsDof8</i> | TATA-box    | 1791           | 1797          | core promoter element around -30 of transcription start              |
| <i>CsDof8</i> | TATA-box    | 1792           | 1798          | core promoter element around -30 of transcription start              |
| <i>CsDof8</i> | TATA-box    | 1793           | 1797          | core promoter element around -30 of transcription start              |
| <i>CsDof8</i> | TATA-box    | 1804           | 1808          | core promoter element around -30 of transcription start              |
| <i>CsDof8</i> | TATA-box    | 1809           | 1815          | core promoter element around -30 of transcription start              |
| <i>CsDof8</i> | TATA-box    | 1810           | 1814          | core promoter element around -30 of transcription start              |
| <i>CsDof8</i> | TATA-box    | 1821           | 1827          | core promoter element around -30 of transcription start              |
| <i>CsDof8</i> | TATA-box    | 1822           | 1828          | core promoter element around -30 of transcription start              |
| <i>CsDof8</i> | TATA-box    | 1823           | 1829          | core promoter element around -30 of transcription start              |
| <i>CsDof8</i> | TATA-box    | 1824           | 1828          | core promoter element around -30 of transcription start              |
| <i>CsDof8</i> | TATA-box    | 1846           | 1852          | core promoter element around -30 of transcription start              |
| <i>CsDof8</i> | TATA-box    | 1847           | 1853          | core promoter element around -30 of transcription start              |
| <i>CsDof8</i> | TATA-box    | 1848           | 1852          | core promoter element around -30 of transcription start              |
| <i>CsDof8</i> | TATA-box    | 1858           | 1862          | core promoter element around -30 of transcription start              |
| <i>CsDof8</i> | GARE-motif  | 1569           | 1576          | gibberellin-responsive element                                       |
| <i>CsDof8</i> | GT1-motif   | 199            | 205           | light responsive element                                             |
| <i>CsDof8</i> | MBS         | 295            | 301           | MYB binding site involved in drought-inducibility                    |
| <i>CsDof8</i> | MBS         | 1291           | 1297          | MYB binding site involved in drought-inducibility                    |
| <i>CsDof8</i> | MBSI        | 1227           | 1237.5        | MYB binding site involved in flavonoid biosynthetic genes regulation |
| <i>CsDof8</i> | MRE         | 223            | 230           | MYB binding site involved in light responsiveness                    |
| <i>CsDof9</i> | ABRE        | 1038           | 1043          | abscisic acid responsiveness                                         |
| <i>CsDof9</i> | ABRE        | 1414           | 1419          | abscisic acid responsiveness                                         |
| <i>CsDof9</i> | ABRE        | 1648           | 1653          | abscisic acid responsiveness                                         |
| <i>CsDof9</i> | TATC-box    | 467            | 474           | cis-acting element involved in gibberellin-responsiveness            |
| <i>CsDof9</i> | TCA-element | 1442           | 1451          | cis-acting element involved in salicylic acid responsiveness         |
| <i>CsDof9</i> | A-box       | 380            | 386           | cis-acting regulatory element                                        |
| <i>CsDof9</i> | A-box       | 532            | 538           | cis-acting regulatory element                                        |
| <i>CsDof9</i> | AuxRR-core  | 329            | 336           | cis-acting regulatory element involved in auxin responsiveness       |
| <i>CsDof9</i> | AuxRR-core  | 1181           | 1188          | cis-acting regulatory element involved in auxin responsiveness       |
| <i>CsDof9</i> | G-box       | 1035           | 1044          | cis-acting regulatory element involved in light responsiveness       |
| <i>CsDof9</i> | G-box       | 1038           | 1044          | cis-acting regulatory element involved in light responsiveness       |
| <i>CsDof9</i> | G-box       | 1414           | 1420          | cis-acting regulatory element involved in light responsiveness       |
| <i>CsDof9</i> | G-Box       | 1647           | 1653          | cis-acting regulatory element involved in light responsiveness       |
| <i>CsDof9</i> | CGTCA-motif | 388            | 393           | cis-acting regulatory element involved in the MeJA-responsiveness    |
| <i>CsDof9</i> | CGTCA-motif | 1570           | 1575          | cis-acting regulatory element involved in the MeJA-responsiveness    |
| <i>CsDof9</i> | TGACG-motif | 388            | 393           | cis-acting regulatory element involved in the MeJA-responsiveness    |
| <i>CsDof9</i> | TGACG-motif | 1570           | 1575          | cis-acting regulatory element involved in the MeJA-responsiveness    |
| <i>CsDof9</i> | CAAT-box    | 265            | 270           | common cis-acting element in promoter and enhancer regions           |
| <i>CsDof9</i> | CAAT-box    | 306            | 311           | common cis-acting element in promoter and enhancer regions           |
| <i>CsDof9</i> | CAAT-box    | 314            | 319           | common cis-acting element in promoter and enhancer regions           |
| <i>CsDof9</i> | CAAT-box    | 495            | 500           | common cis-acting element in promoter and enhancer regions           |
| <i>CsDof9</i> | CAAT-box    | 601            | 606           | common cis-acting element in promoter and enhancer regions           |
| <i>CsDof9</i> | CAAT-box    | 637            | 646           | common cis-acting element in promoter and enhancer regions           |

| Name           | Cis-element | Start position | Stop position | Function                                                   |
|----------------|-------------|----------------|---------------|------------------------------------------------------------|
| <i>CsDof9</i>  | CAAT-box    | 639            | 644           | common cis-acting element in promoter and enhancer regions |
| <i>CsDof9</i>  | CAAT-box    | 754            | 762           | common cis-acting element in promoter and enhancer regions |
| <i>CsDof9</i>  | CAAT-box    | 755            | 760           | common cis-acting element in promoter and enhancer regions |
| <i>CsDof9</i>  | CAAT-box    | 791            | 796           | common cis-acting element in promoter and enhancer regions |
| <i>CsDof9</i>  | CAAT-box    | 832            | 837           | common cis-acting element in promoter and enhancer regions |
| <i>CsDof9</i>  | CAAT-box    | 1368           | 1373          | common cis-acting element in promoter and enhancer regions |
| <i>CsDof9</i>  | CAAT-box    | 1599           | 1604          | common cis-acting element in promoter and enhancer regions |
| <i>CsDof9</i>  | CAAT-box    | 1656           | 1661          | common cis-acting element in promoter and enhancer regions |
| <i>CsDof9</i>  | TATA-box    | 3              | 8             | core promoter element around -30 of transcription start    |
| <i>CsDof9</i>  | TATA-box    | 4              | 8             | core promoter element around -30 of transcription start    |
| <i>CsDof9</i>  | TATA-box    | 76             | 82            | core promoter element around -30 of transcription start    |
| <i>CsDof9</i>  | TATA-box    | 77             | 81            | core promoter element around -30 of transcription start    |
| <i>CsDof9</i>  | TATA-box    | 160            | 166           | core promoter element around -30 of transcription start    |
| <i>CsDof9</i>  | TATA-box    | 161            | 166           | core promoter element around -30 of transcription start    |
| <i>CsDof9</i>  | TATA-box    | 162            | 166           | core promoter element around -30 of transcription start    |
| <i>CsDof9</i>  | TATA-box    | 259            | 266           | core promoter element around -30 of transcription start    |
| <i>CsDof9</i>  | TATA-box    | 671            | 675           | core promoter element around -30 of transcription start    |
| <i>CsDof9</i>  | TATA-box    | 816            | 820           | core promoter element around -30 of transcription start    |
| <i>CsDof9</i>  | TATA-box    | 937            | 946           | core promoter element around -30 of transcription start    |
| <i>CsDof9</i>  | TATA-box    | 938            | 945           | core promoter element around -30 of transcription start    |
| <i>CsDof9</i>  | TATA-box    | 939            | 945           | core promoter element around -30 of transcription start    |
| <i>CsDof9</i>  | TATA-box    | 940            | 945           | core promoter element around -30 of transcription start    |
| <i>CsDof9</i>  | TATA-box    | 941            | 945           | core promoter element around -30 of transcription start    |
| <i>CsDof9</i>  | TATA-box    | 984            | 990           | core promoter element around -30 of transcription start    |
| <i>CsDof9</i>  | TATA-box    | 985            | 989           | core promoter element around -30 of transcription start    |
| <i>CsDof9</i>  | TATA-box    | 1008           | 1015          | core promoter element around -30 of transcription start    |
| <i>CsDof9</i>  | TATA-box    | 1082           | 1089          | core promoter element around -30 of transcription start    |
| <i>CsDof9</i>  | TATA-box    | 1083           | 1089          | core promoter element around -30 of transcription start    |
| <i>CsDof9</i>  | TATA-box    | 1084           | 1089          | core promoter element around -30 of transcription start    |
| <i>CsDof9</i>  | TATA-box    | 1085           | 1089          | core promoter element around -30 of transcription start    |
| <i>CsDof9</i>  | TATA-box    | 1136           | 1140          | core promoter element around -30 of transcription start    |
| <i>CsDof9</i>  | TATA-box    | 1186           | 1192          | core promoter element around -30 of transcription start    |
| <i>CsDof9</i>  | TATA-box    | 1187           | 1191          | core promoter element around -30 of transcription start    |
| <i>CsDof9</i>  | TATA-box    | 1273           | 1279          | core promoter element around -30 of transcription start    |
| <i>CsDof9</i>  | TATA-box    | 1274           | 1279          | core promoter element around -30 of transcription start    |
| <i>CsDof9</i>  | TATA-box    | 1275           | 1279          | core promoter element around -30 of transcription start    |
| <i>CsDof9</i>  | TATA-box    | 1308           | 1312          | core promoter element around -30 of transcription start    |
| <i>CsDof9</i>  | TATA-box    | 1320           | 1326          | core promoter element around -30 of transcription start    |
| <i>CsDof9</i>  | TATA-box    | 1321           | 1326          | core promoter element around -30 of transcription start    |
| <i>CsDof9</i>  | TATA-box    | 1322           | 1326          | core promoter element around -30 of transcription start    |
| <i>CsDof9</i>  | TATA-box    | 1454           | 1462          | core promoter element around -30 of transcription start    |
| <i>CsDof9</i>  | TATA-box    | 1630           | 1635          | core promoter element around -30 of transcription start    |
| <i>CsDof9</i>  | TATA-box    | 1631           | 1635          | core promoter element around -30 of transcription start    |
| <i>CsDof9</i>  | TATA-box    | 1747           | 1751          | core promoter element around -30 of transcription start    |
| <i>CsDof9</i>  | GARE-motif  | 521            | 528           | gibberellin-responsive element                             |
| <i>CsDof9</i>  | P-box       | 1419           | 1426          | gibberellin-responsive element                             |
| <i>CsDof10</i> | ABRE        | 179            | 184           | abscisic acid responsiveness                               |
| <i>CsDof10</i> | ABRE        | 1061           | 1070          | abscisic acid responsiveness                               |
| <i>CsDof10</i> | ABRE        | 1063           | 1068          | abscisic acid responsiveness                               |
| <i>CsDof10</i> | ABRE        | 1068           | 1073          | abscisic acid responsiveness                               |
| <i>CsDof10</i> | TGA-element | 771            | 777           | auxin-responsive element                                   |

| Name           | Cis-element | Start position | Stop position | Function                                                            |
|----------------|-------------|----------------|---------------|---------------------------------------------------------------------|
| <i>CsDof10</i> | LTR         | 454            | 460           | cis-acting element involved in low-temperature responsiveness       |
| <i>CsDof10</i> | LTR         | 1710           | 1716          | cis-acting element involved in low-temperature responsiveness       |
| <i>CsDof10</i> | TCA-element | 996            | 1006          | cis-acting element involved in salicylic acid responsiveness        |
| <i>CsDof10</i> | ARE         | 285            | 291           | cis-acting regulatory element essential for the anaerobic induction |
| <i>CsDof10</i> | ARE         | 1288           | 1294          | cis-acting regulatory element essential for the anaerobic induction |
| <i>CsDof10</i> | ARE         | 1338           | 1344          | cis-acting regulatory element essential for the anaerobic induction |
| <i>CsDof10</i> | circadian   | 433            | 442           | cis-acting regulatory element involved in circadian control         |
| <i>CsDof10</i> | circadian   | 1041           | 1050          | cis-acting regulatory element involved in circadian control         |
| <i>CsDof10</i> | G-box       | 178            | 184           | cis-acting regulatory element involved in light responsiveness      |
| <i>CsDof10</i> | G-box       | 573            | 582           | cis-acting regulatory element involved in light responsiveness      |
| <i>CsDof10</i> | G-box       | 1063           | 1069          | cis-acting regulatory element involved in light responsiveness      |
| <i>CsDof10</i> | G-box       | 1067           | 1073          | cis-acting regulatory element involved in light responsiveness      |
| <i>CsDof10</i> | RY-element  | 321            | 329           | cis-acting regulatory element involved in seed-specific regulation  |
| <i>CsDof10</i> | CAAT-box    | 189            | 194           | common cis-acting element in promoter and enhancer regions          |
| <i>CsDof10</i> | CAAT-box    | 236            | 241           | common cis-acting element in promoter and enhancer regions          |
| <i>CsDof10</i> | CAAT-box    | 388            | 393           | common cis-acting element in promoter and enhancer regions          |
| <i>CsDof10</i> | CAAT-box    | 609            | 614           | common cis-acting element in promoter and enhancer regions          |
| <i>CsDof10</i> | CAAT-box    | 822            | 827           | common cis-acting element in promoter and enhancer regions          |
| <i>CsDof10</i> | CAAT-box    | 975            | 980           | common cis-acting element in promoter and enhancer regions          |
| <i>CsDof10</i> | CAAT-box    | 982            | 987           | common cis-acting element in promoter and enhancer regions          |
| <i>CsDof10</i> | CAAT-box    | 1028           | 1033          | common cis-acting element in promoter and enhancer regions          |
| <i>CsDof10</i> | CAAT-box    | 1156           | 1161          | common cis-acting element in promoter and enhancer regions          |
| <i>CsDof10</i> | CAAT-box    | 1281           | 1286          | common cis-acting element in promoter and enhancer regions          |
| <i>CsDof10</i> | CAAT-box    | 1631           | 1636          | common cis-acting element in promoter and enhancer regions          |
| <i>CsDof10</i> | CAAT-box    | 1776           | 1781          | common cis-acting element in promoter and enhancer regions          |
| <i>CsDof10</i> | CAAT-box    | 1909           | 1914          | common cis-acting element in promoter and enhancer regions          |
| <i>CsDof10</i> | TATA-box    | 1              | 5             | core promoter element around -30 of transcription start             |
| <i>CsDof10</i> | TATA-box    | 24             | 28            | core promoter element around -30 of transcription start             |
| <i>CsDof10</i> | TATA-box    | 57             | 64            | core promoter element around -30 of transcription start             |
| <i>CsDof10</i> | TATA-box    | 58             | 64            | core promoter element around -30 of transcription start             |
| <i>CsDof10</i> | TATA-box    | 59             | 64            | core promoter element around -30 of transcription start             |
| <i>CsDof10</i> | TATA-box    | 60             | 64            | core promoter element around -30 of transcription start             |
| <i>CsDof10</i> | TATA-box    | 107            | 115           | core promoter element around -30 of transcription start             |
| <i>CsDof10</i> | TATA-box    | 108            | 115           | core promoter element around -30 of transcription start             |
| <i>CsDof10</i> | TATA-box    | 109            | 115           | core promoter element around -30 of transcription start             |
| <i>CsDof10</i> | TATA-box    | 110            | 115           | core promoter element around -30 of transcription start             |
| <i>CsDof10</i> | TATA-box    | 111            | 115           | core promoter element around -30 of transcription start             |
| <i>CsDof10</i> | TATA-box    | 124            | 130           | core promoter element around -30 of transcription start             |
| <i>CsDof10</i> | TATA-box    | 126            | 130           | core promoter element around -30 of transcription start             |
| <i>CsDof10</i> | TATA-box    | 138            | 142           | core promoter element around -30 of transcription start             |
| <i>CsDof10</i> | TATA-box    | 294            | 300           | core promoter element around -30 of transcription start             |
| <i>CsDof10</i> | TATA-box    | 295            | 301           | core promoter element around -30 of transcription start             |
| <i>CsDof10</i> | TATA-box    | 296            | 300           | core promoter element around -30 of transcription start             |
| <i>CsDof10</i> | TATA-box    | 412            | 417           | core promoter element around -30 of transcription start             |
| <i>CsDof10</i> | TATA-box    | 413            | 417           | core promoter element around -30 of transcription start             |
| <i>CsDof10</i> | TATA-box    | 473            | 480           | core promoter element around -30 of transcription start             |
| <i>CsDof10</i> | TATA-box    | 474            | 480           | core promoter element around -30 of transcription start             |
| <i>CsDof10</i> | TATA-box    | 475            | 480           | core promoter element around -30 of transcription start             |
| <i>CsDof10</i> | TATA-box    | 476            | 480           | core promoter element around -30 of transcription start             |
| <i>CsDof10</i> | TATA-box    | 753            | 757           | core promoter element around -30 of transcription start             |
| <i>CsDof10</i> | TATA-box    | 835            | 842           | core promoter element around -30 of transcription start             |





| Name           | Cis-element        | Start position | Stop position | Function                                                          |
|----------------|--------------------|----------------|---------------|-------------------------------------------------------------------|
| <i>CsDof10</i> | TATA-box           | 1690           | 1694          | core promoter element around -30 of transcription start           |
| <i>CsDof10</i> | 3-AF1 binding site | 1551           | 1561          | light responsive element                                          |
| <i>CsDof10</i> | 3-AF1 binding site | 1857           | 1867          | light responsive element                                          |
| <i>CsDof11</i> | ABRE               | 741            | 747           | abscisic acid responsiveness                                      |
| <i>CsDof11</i> | ABRE               | 742            | 747           | abscisic acid responsiveness                                      |
| <i>CsDof11</i> | ABRE               | 1796           | 1801          | abscisic acid responsiveness                                      |
| <i>CsDof11</i> | TC-rich repeats    | 636            | 645           | cis-acting element involved in defense and stress responsiveness  |
| <i>CsDof11</i> | ACE                | 631            | 640           | cis-acting element involved in light responsiveness               |
| <i>CsDof11</i> | LTR                | 404            | 410           | cis-acting element involved in low-temperature responsiveness     |
| <i>CsDof11</i> | TCA-element        | 1551           | 1560          | cis-acting element involved in salicylic acid responsiveness      |
| <i>CsDof11</i> | G-Box              | 741            | 747           | cis-acting regulatory element involved in light responsiveness    |
| <i>CsDof11</i> | G-Box              | 1796           | 1802          | cis-acting regulatory element involved in light responsiveness    |
| <i>CsDof11</i> | G-box              | 741            | 747           | cis-acting regulatory element involved in light responsiveness    |
| <i>CsDof11</i> | G-box              | 1796           | 1804          | cis-acting regulatory element involved in light responsiveness    |
| <i>CsDof11</i> | CGTCA-motif        | 777            | 782           | cis-acting regulatory element involved in the MeJA-responsiveness |
| <i>CsDof11</i> | CGTCA-motif        | 905            | 910           | cis-acting regulatory element involved in the MeJA-responsiveness |
| <i>CsDof11</i> | TGACG-motif        | 777            | 782           | cis-acting regulatory element involved in the MeJA-responsiveness |
| <i>CsDof11</i> | TGACG-motif        | 905            | 910           | cis-acting regulatory element involved in the MeJA-responsiveness |
| <i>CsDof11</i> | CAAT-box           | 91             | 96            | common cis-acting element in promoter and enhancer regions        |
| <i>CsDof11</i> | CAAT-box           | 360            | 365           | common cis-acting element in promoter and enhancer regions        |
| <i>CsDof11</i> | CAAT-box           | 399            | 404           | common cis-acting element in promoter and enhancer regions        |
| <i>CsDof11</i> | CAAT-box           | 505            | 510           | common cis-acting element in promoter and enhancer regions        |
| <i>CsDof11</i> | CAAT-box           | 546            | 551           | common cis-acting element in promoter and enhancer regions        |
| <i>CsDof11</i> | CAAT-box           | 687            | 692           | common cis-acting element in promoter and enhancer regions        |
| <i>CsDof11</i> | CAAT-box           | 848            | 853           | common cis-acting element in promoter and enhancer regions        |
| <i>CsDof11</i> | CAAT-box           | 866            | 871           | common cis-acting element in promoter and enhancer regions        |
| <i>CsDof11</i> | CAAT-box           | 931            | 936           | common cis-acting element in promoter and enhancer regions        |
| <i>CsDof11</i> | CAAT-box           | 1046           | 1051          | common cis-acting element in promoter and enhancer regions        |
| <i>CsDof11</i> | CAAT-box           | 1171           | 1176          | common cis-acting element in promoter and enhancer regions        |
| <i>CsDof11</i> | CAAT-box           | 1454           | 1459          | common cis-acting element in promoter and enhancer regions        |
| <i>CsDof11</i> | CAAT-box           | 1563           | 1568          | common cis-acting element in promoter and enhancer regions        |
| <i>CsDof11</i> | CAAT-box           | 1590           | 1595          | common cis-acting element in promoter and enhancer regions        |
| <i>CsDof11</i> | CAAT-box           | 1697           | 1702          | common cis-acting element in promoter and enhancer regions        |
| <i>CsDof11</i> | CAAT-box           | 1733           | 1738          | common cis-acting element in promoter and enhancer regions        |
| <i>CsDof11</i> | CAAT-box           | 1954           | 1959          | common cis-acting element in promoter and enhancer regions        |
| <i>CsDof11</i> | TATA-box           | 20             | 27            | core promoter element around -30 of transcription start           |
| <i>CsDof11</i> | TATA-box           | 21             | 27            | core promoter element around -30 of transcription start           |
| <i>CsDof11</i> | TATA-box           | 22             | 27            | core promoter element around -30 of transcription start           |
| <i>CsDof11</i> | TATA-box           | 23             | 27            | core promoter element around -30 of transcription start           |
| <i>CsDof11</i> | TATA-box           | 256            | 262           | core promoter element around -30 of transcription start           |
| <i>CsDof11</i> | TATA-box           | 257            | 262           | core promoter element around -30 of transcription start           |
| <i>CsDof11</i> | TATA-box           | 258            | 262           | core promoter element around -30 of transcription start           |
| <i>CsDof11</i> | TATA-box           | 297            | 304           | core promoter element around -30 of transcription start           |
| <i>CsDof11</i> | TATA-box           | 298            | 304           | core promoter element around -30 of transcription start           |
| <i>CsDof11</i> | TATA-box           | 299            | 305           | core promoter element around -30 of transcription start           |
| <i>CsDof11</i> | TATA-box           | 300            | 304           | core promoter element around -30 of transcription start           |
| <i>CsDof11</i> | TATA-box           | 312            | 318           | core promoter element around -30 of transcription start           |
| <i>CsDof11</i> | TATA-box           | 313            | 318           | core promoter element around -30 of transcription start           |
| <i>CsDof11</i> | TATA-box           | 314            | 318           | core promoter element around -30 of transcription start           |
| <i>CsDof11</i> | TATA-box           | 329            | 336           | core promoter element around -30 of transcription start           |
| <i>CsDof11</i> | TATA-box           | 330            | 336           | core promoter element around -30 of transcription start           |

| Name           | Cis-element | Start position | Stop position | Function                                                             |
|----------------|-------------|----------------|---------------|----------------------------------------------------------------------|
| <i>CsDof11</i> | TATA-box    | 331            | 336           | core promoter element around -30 of transcription start              |
| <i>CsDof11</i> | TATA-box    | 332            | 336           | core promoter element around -30 of transcription start              |
| <i>CsDof11</i> | TATA-box    | 447            | 454           | core promoter element around -30 of transcription start              |
| <i>CsDof11</i> | TATA-box    | 600            | 605           | core promoter element around -30 of transcription start              |
| <i>CsDof11</i> | TATA-box    | 601            | 605           | core promoter element around -30 of transcription start              |
| <i>CsDof11</i> | TATA-box    | 799            | 803           | core promoter element around -30 of transcription start              |
| <i>CsDof11</i> | TATA-box    | 934            | 940           | core promoter element around -30 of transcription start              |
| <i>CsDof11</i> | TATA-box    | 935            | 941           | core promoter element around -30 of transcription start              |
| <i>CsDof11</i> | TATA-box    | 937            | 941           | core promoter element around -30 of transcription start              |
| <i>CsDof11</i> | TATA-box    | 961            | 967           | core promoter element around -30 of transcription start              |
| <i>CsDof11</i> | TATA-box    | 962            | 969           | core promoter element around -30 of transcription start              |
| <i>CsDof11</i> | TATA-box    | 963            | 969           | core promoter element around -30 of transcription start              |
| <i>CsDof11</i> | TATA-box    | 964            | 970           | core promoter element around -30 of transcription start              |
| <i>CsDof11</i> | TATA-box    | 965            | 969           | core promoter element around -30 of transcription start              |
| <i>CsDof11</i> | TATA-box    | 975            | 979           | core promoter element around -30 of transcription start              |
| <i>CsDof11</i> | TATA-box    | 998            | 1004          | core promoter element around -30 of transcription start              |
| <i>CsDof11</i> | TATA-box    | 1000           | 1006          | core promoter element around -30 of transcription start              |
| <i>CsDof11</i> | TATA-box    | 1001           | 1007          | core promoter element around -30 of transcription start              |
| <i>CsDof11</i> | TATA-box    | 1002           | 1006          | core promoter element around -30 of transcription start              |
| <i>CsDof11</i> | TATA-box    | 1021           | 1025          | core promoter element around -30 of transcription start              |
| <i>CsDof11</i> | TATA-box    | 1268           | 1274          | core promoter element around -30 of transcription start              |
| <i>CsDof11</i> | TATA-box    | 1269           | 1273          | core promoter element around -30 of transcription start              |
| <i>CsDof11</i> | TATA-box    | 1312           | 1318          | core promoter element around -30 of transcription start              |
| <i>CsDof11</i> | TATA-box    | 1313           | 1318          | core promoter element around -30 of transcription start              |
| <i>CsDof11</i> | TATA-box    | 1314           | 1318          | core promoter element around -30 of transcription start              |
| <i>CsDof11</i> | TATA-box    | 1502           | 1507          | core promoter element around -30 of transcription start              |
| <i>CsDof11</i> | TATA-box    | 1503           | 1507          | core promoter element around -30 of transcription start              |
| <i>CsDof11</i> | TATA-box    | 1515           | 1523          | core promoter element around -30 of transcription start              |
| <i>CsDof11</i> | TATA-box    | 1703           | 1709          | core promoter element around -30 of transcription start              |
| <i>CsDof11</i> | TATA-box    | 1704           | 1711          | core promoter element around -30 of transcription start              |
| <i>CsDof11</i> | TATA-box    | 1705           | 1711          | core promoter element around -30 of transcription start              |
| <i>CsDof11</i> | TATA-box    | 1706           | 1712          | core promoter element around -30 of transcription start              |
| <i>CsDof11</i> | TATA-box    | 1707           | 1711          | core promoter element around -30 of transcription start              |
| <i>CsDof11</i> | TATA-box    | 1888           | 1894          | core promoter element around -30 of transcription start              |
| <i>CsDof11</i> | TATA-box    | 1889           | 1895          | core promoter element around -30 of transcription start              |
| <i>CsDof11</i> | TATA-box    | 1890           | 1896          | core promoter element around -30 of transcription start              |
| <i>CsDof11</i> | TATA-box    | 1891           | 1895          | core promoter element around -30 of transcription start              |
| <i>CsDof11</i> | TATA-box    | 1916           | 1920          | core promoter element around -30 of transcription start              |
| <i>CsDof11</i> | Sp1         | 1791           | 1797          | light responsive element                                             |
| <i>CsDof11</i> | MBSI        | 1657           | 1667.5        | MYB binding site involved in flavonoid biosynthetic genes regulation |
| <i>CsDof12</i> | ABRE        | 112            | 117           | abscisic acid responsiveness                                         |
| <i>CsDof12</i> | ABRE        | 214            | 219           | abscisic acid responsiveness                                         |
| <i>CsDof12</i> | ABRE        | 396            | 401           | abscisic acid responsiveness                                         |
| <i>CsDof12</i> | ABRE        | 1685           | 1690          | abscisic acid responsiveness                                         |
| <i>CsDof12</i> | ABRE        | 1829           | 1834          | abscisic acid responsiveness                                         |
| <i>CsDof12</i> | LTR         | 245            | 251           | cis-acting element involved in low-temperature responsiveness        |
| <i>CsDof12</i> | TCA-element | 1005           | 1014          | cis-acting element involved in salicylic acid responsiveness         |
| <i>CsDof12</i> | TCA-element | 1899           | 1908          | cis-acting element involved in salicylic acid responsiveness         |
| <i>CsDof12</i> | SARE        | 1008           | 1019          | cis-acting element involved in salicylic acid responsiveness         |
| <i>CsDof12</i> | ARE         | 728            | 734           | cis-acting regulatory element essential for the anaerobic induction  |
| <i>CsDof12</i> | ARE         | 819            | 825           | cis-acting regulatory element essential for the anaerobic induction  |

| Name           | Cis-element | Start position | Stop position | Function                                                             |
|----------------|-------------|----------------|---------------|----------------------------------------------------------------------|
| <i>CsDof12</i> | ARE         | 975            | 981           | cis-acting regulatory element essential for the anaerobic induction  |
| <i>CsDof12</i> | ARE         | 1237           | 1243          | cis-acting regulatory element essential for the anaerobic induction  |
| <i>CsDof12</i> | AuxRR-core  | 411            | 418           | cis-acting regulatory element involved in auxin responsiveness       |
| <i>CsDof12</i> | G-box       | 111            | 117           | cis-acting regulatory element involved in light responsiveness       |
| <i>CsDof12</i> | G-box       | 213            | 219           | cis-acting regulatory element involved in light responsiveness       |
| <i>CsDof12</i> | G-box       | 396            | 402           | cis-acting regulatory element involved in light responsiveness       |
| <i>CsDof12</i> | G-box       | 1684           | 1690          | cis-acting regulatory element involved in light responsiveness       |
| <i>CsDof12</i> | G-box       | 1828           | 1834          | cis-acting regulatory element involved in light responsiveness       |
| <i>CsDof12</i> | RY-element  | 1278           | 1286          | cis-acting regulatory element involved in seed-specific regulation   |
| <i>CsDof12</i> | CGTCA-motif | 212            | 217           | cis-acting regulatory element involved in the MeJA-responsiveness    |
| <i>CsDof12</i> | CGTCA-motif | 1683           | 1688          | cis-acting regulatory element involved in the MeJA-responsiveness    |
| <i>CsDof12</i> | TGACG-motif | 212            | 217           | cis-acting regulatory element involved in the MeJA-responsiveness    |
| <i>CsDof12</i> | TGACG-motif | 1683           | 1688          | cis-acting regulatory element involved in the MeJA-responsiveness    |
| <i>CsDof12</i> | O2-site     | 210            | 219           | cis-acting regulatory element involved in zein metabolism regulation |
| <i>CsDof12</i> | CAT-box     | 522            | 528           | cis-acting regulatory element related to meristem expression         |
| <i>CsDof12</i> | CAT-box     | 1719           | 1725          | cis-acting regulatory element related to meristem expression         |
| <i>CsDof12</i> | CAAT-box    | 38             | 43            | common cis-acting element in promoter and enhancer regions           |
| <i>CsDof12</i> | CAAT-box    | 83             | 88            | common cis-acting element in promoter and enhancer regions           |
| <i>CsDof12</i> | CAAT-box    | 136            | 141           | common cis-acting element in promoter and enhancer regions           |
| <i>CsDof12</i> | CAAT-box    | 281            | 286           | common cis-acting element in promoter and enhancer regions           |
| <i>CsDof12</i> | CAAT-box    | 310            | 315           | common cis-acting element in promoter and enhancer regions           |
| <i>CsDof12</i> | CAAT-box    | 347            | 352           | common cis-acting element in promoter and enhancer regions           |
| <i>CsDof12</i> | CAAT-box    | 434            | 439           | common cis-acting element in promoter and enhancer regions           |
| <i>CsDof12</i> | CAAT-box    | 666            | 671           | common cis-acting element in promoter and enhancer regions           |
| <i>CsDof12</i> | CAAT-box    | 669            | 674           | common cis-acting element in promoter and enhancer regions           |
| <i>CsDof12</i> | CAAT-box    | 791            | 796           | common cis-acting element in promoter and enhancer regions           |
| <i>CsDof12</i> | CAAT-box    | 796            | 801           | common cis-acting element in promoter and enhancer regions           |
| <i>CsDof12</i> | CAAT-box    | 874            | 879           | common cis-acting element in promoter and enhancer regions           |
| <i>CsDof12</i> | CAAT-box    | 1016           | 1021          | common cis-acting element in promoter and enhancer regions           |
| <i>CsDof12</i> | CAAT-box    | 1408           | 1413          | common cis-acting element in promoter and enhancer regions           |
| <i>CsDof12</i> | CAAT-box    | 1460           | 1465          | common cis-acting element in promoter and enhancer regions           |
| <i>CsDof12</i> | CAAT-box    | 1475           | 1483          | common cis-acting element in promoter and enhancer regions           |
| <i>CsDof12</i> | CAAT-box    | 1476           | 1481          | common cis-acting element in promoter and enhancer regions           |
| <i>CsDof12</i> | CAAT-box    | 1580           | 1585          | common cis-acting element in promoter and enhancer regions           |
| <i>CsDof12</i> | CAAT-box    | 1676           | 1681          | common cis-acting element in promoter and enhancer regions           |
| <i>CsDof12</i> | CAAT-box    | 1708           | 1713          | common cis-acting element in promoter and enhancer regions           |
| <i>CsDof12</i> | CAAT-box    | 1931           | 1936          | common cis-acting element in promoter and enhancer regions           |
| <i>CsDof12</i> | CAAT-box    | 1958           | 1963          | common cis-acting element in promoter and enhancer regions           |
| <i>CsDof12</i> | TATA-box    | 3              | 10            | core promoter element around -30 of transcription start              |
| <i>CsDof12</i> | TATA-box    | 4              | 10            | core promoter element around -30 of transcription start              |
| <i>CsDof12</i> | TATA-box    | 5              | 10            | core promoter element around -30 of transcription start              |
| <i>CsDof12</i> | TATA-box    | 6              | 10            | core promoter element around -30 of transcription start              |
| <i>CsDof12</i> | TATA-box    | 34             | 40            | core promoter element around -30 of transcription start              |
| <i>CsDof12</i> | TATA-box    | 35             | 39            | core promoter element around -30 of transcription start              |
| <i>CsDof12</i> | TATA-box    | 326            | 333           | core promoter element around -30 of transcription start              |
| <i>CsDof12</i> | TATA-box    | 429            | 433           | core promoter element around -30 of transcription start              |
| <i>CsDof12</i> | TATA-box    | 538            | 544           | core promoter element around -30 of transcription start              |
| <i>CsDof12</i> | TATA-box    | 540            | 544           | core promoter element around -30 of transcription start              |
| <i>CsDof12</i> | TATA-box    | 851            | 860           | core promoter element around -30 of transcription start              |
| <i>CsDof12</i> | TATA-box    | 852            | 859           | core promoter element around -30 of transcription start              |
| <i>CsDof12</i> | TATA-box    | 853            | 859           | core promoter element around -30 of transcription start              |

| Name           | Cis-element | Start position | Stop position | Function                                                             |
|----------------|-------------|----------------|---------------|----------------------------------------------------------------------|
| <i>CsDof12</i> | TATA-box    | 854            | 859           | core promoter element around -30 of transcription start              |
| <i>CsDof12</i> | TATA-box    | 855            | 859           | core promoter element around -30 of transcription start              |
| <i>CsDof12</i> | TATA-box    | 923            | 931           | core promoter element around -30 of transcription start              |
| <i>CsDof12</i> | TATA-box    | 1003           | 1009          | core promoter element around -30 of transcription start              |
| <i>CsDof12</i> | TATA-box    | 1004           | 1008          | core promoter element around -30 of transcription start              |
| <i>CsDof12</i> | TATA-box    | 1045           | 1049          | core promoter element around -30 of transcription start              |
| <i>CsDof12</i> | TATA-box    | 1121           | 1128          | core promoter element around -30 of transcription start              |
| <i>CsDof12</i> | TATA-box    | 1122           | 1128          | core promoter element around -30 of transcription start              |
| <i>CsDof12</i> | TATA-box    | 1123           | 1128          | core promoter element around -30 of transcription start              |
| <i>CsDof12</i> | TATA-box    | 1124           | 1128          | core promoter element around -30 of transcription start              |
| <i>CsDof12</i> | TATA-box    | 1126           | 1134          | core promoter element around -30 of transcription start              |
| <i>CsDof12</i> | TATA-box    | 1127           | 1134          | core promoter element around -30 of transcription start              |
| <i>CsDof12</i> | TATA-box    | 1128           | 1134          | core promoter element around -30 of transcription start              |
| <i>CsDof12</i> | TATA-box    | 1129           | 1134          | core promoter element around -30 of transcription start              |
| <i>CsDof12</i> | TATA-box    | 1130           | 1134          | core promoter element around -30 of transcription start              |
| <i>CsDof12</i> | TATA-box    | 1146           | 1154          | core promoter element around -30 of transcription start              |
| <i>CsDof12</i> | TATA-box    | 1217           | 1226          | core promoter element around -30 of transcription start              |
| <i>CsDof12</i> | TATA-box    | 1218           | 1225          | core promoter element around -30 of transcription start              |
| <i>CsDof12</i> | TATA-box    | 1219           | 1225          | core promoter element around -30 of transcription start              |
| <i>CsDof12</i> | TATA-box    | 1220           | 1227          | core promoter element around -30 of transcription start              |
| <i>CsDof12</i> | TATA-box    | 1221           | 1227          | core promoter element around -30 of transcription start              |
| <i>CsDof12</i> | TATA-box    | 1222           | 1228          | core promoter element around -30 of transcription start              |
| <i>CsDof12</i> | TATA-box    | 1223           | 1227          | core promoter element around -30 of transcription start              |
| <i>CsDof12</i> | TATA-box    | 1376           | 1382          | core promoter element around -30 of transcription start              |
| <i>CsDof12</i> | TATA-box    | 1377           | 1383          | core promoter element around -30 of transcription start              |
| <i>CsDof12</i> | TATA-box    | 1378           | 1384          | core promoter element around -30 of transcription start              |
| <i>CsDof12</i> | TATA-box    | 1379           | 1385          | core promoter element around -30 of transcription start              |
| <i>CsDof12</i> | TATA-box    | 1380           | 1386          | core promoter element around -30 of transcription start              |
| <i>CsDof12</i> | TATA-box    | 1381           | 1385          | core promoter element around -30 of transcription start              |
| <i>CsDof12</i> | TATA-box    | 1510           | 1514          | core promoter element around -30 of transcription start              |
| <i>CsDof12</i> | TATA-box    | 1515           | 1519          | core promoter element around -30 of transcription start              |
| <i>CsDof12</i> | TATA-box    | 1523           | 1527          | core promoter element around -30 of transcription start              |
| <i>CsDof12</i> | TATA-box    | 1556           | 1560          | core promoter element around -30 of transcription start              |
| <i>CsDof12</i> | TATA-box    | 1595           | 1602          | core promoter element around -30 of transcription start              |
| <i>CsDof12</i> | TATA-box    | 1903           | 1911          | core promoter element around -30 of transcription start              |
| <i>CsDof12</i> | TATA-box    | 1906           | 1911          | core promoter element around -30 of transcription start              |
| <i>CsDof12</i> | TATA-box    | 1907           | 1911          | core promoter element around -30 of transcription start              |
| <i>CsDof12</i> | P-box       | 464            | 471           | gibberellin-responsive element                                       |
| <i>CsDof12</i> | MBS         | 596            | 602           | MYB binding site involved in drought-inducibility                    |
| <i>CsDof12</i> | MRE         | 1252           | 1259          | MYB binding site involved in light responsiveness                    |
| <i>CsDof13</i> | ABRE        | 207            | 216           | abscisic acid responsiveness                                         |
| <i>CsDof13</i> | ABRE        | 210            | 215           | abscisic acid responsiveness                                         |
| <i>CsDof13</i> | ABRE        | 1190           | 1195          | abscisic acid responsiveness                                         |
| <i>CsDof13</i> | ABRE        | 1209           | 1214          | abscisic acid responsiveness                                         |
| <i>CsDof13</i> | ACE         | 1770           | 1779          | cis-acting element involved in light responsiveness                  |
| <i>CsDof13</i> | TCA-element | 1889           | 1898          | cis-acting element involved in salicylic acid responsiveness         |
| <i>CsDof13</i> | ARE         | 1531           | 1537          | cis-acting regulatory element essential for the anaerobic induction  |
| <i>CsDof13</i> | G-box       | 209            | 215           | cis-acting regulatory element involved in light responsiveness       |
| <i>CsDof13</i> | G-box       | 1190           | 1196          | cis-acting regulatory element involved in light responsiveness       |
| <i>CsDof13</i> | G-Box       | 1209           | 1215          | cis-acting regulatory element involved in light responsiveness       |
| <i>CsDof13</i> | O2-site     | 654            | 663           | cis-acting regulatory element involved in zein metabolism regulation |

| Name           | Cis-element | Start position | Stop position | Function                                                     |
|----------------|-------------|----------------|---------------|--------------------------------------------------------------|
| <i>CsDof13</i> | CAT-box     | 1482           | 1488          | cis-acting regulatory element related to meristem expression |
| <i>CsDof13</i> | CAAT-box    | 48             | 53            | common cis-acting element in promoter and enhancer regions   |
| <i>CsDof13</i> | CAAT-box    | 267            | 272           | common cis-acting element in promoter and enhancer regions   |
| <i>CsDof13</i> | CAAT-box    | 332            | 337           | common cis-acting element in promoter and enhancer regions   |
| <i>CsDof13</i> | CAAT-box    | 344            | 349           | common cis-acting element in promoter and enhancer regions   |
| <i>CsDof13</i> | CAAT-box    | 788            | 793           | common cis-acting element in promoter and enhancer regions   |
| <i>CsDof13</i> | CAAT-box    | 1013           | 1018          | common cis-acting element in promoter and enhancer regions   |
| <i>CsDof13</i> | CAAT-box    | 1140           | 1145          | common cis-acting element in promoter and enhancer regions   |
| <i>CsDof13</i> | CAAT-box    | 1166           | 1171          | common cis-acting element in promoter and enhancer regions   |
| <i>CsDof13</i> | CAAT-box    | 1204           | 1209          | common cis-acting element in promoter and enhancer regions   |
| <i>CsDof13</i> | CAAT-box    | 1433           | 1438          | common cis-acting element in promoter and enhancer regions   |
| <i>CsDof13</i> | CAAT-box    | 1535           | 1540          | common cis-acting element in promoter and enhancer regions   |
| <i>CsDof13</i> | CAAT-box    | 1874           | 1879          | common cis-acting element in promoter and enhancer regions   |
| <i>CsDof13</i> | TATA-box    | 31             | 37            | core promoter element around -30 of transcription start      |
| <i>CsDof13</i> | TATA-box    | 33             | 37            | core promoter element around -30 of transcription start      |
| <i>CsDof13</i> | TATA-box    | 38             | 42            | core promoter element around -30 of transcription start      |
| <i>CsDof13</i> | TATA-box    | 64             | 68            | core promoter element around -30 of transcription start      |
| <i>CsDof13</i> | TATA-box    | 69             | 73            | core promoter element around -30 of transcription start      |
| <i>CsDof13</i> | TATA-box    | 198            | 206           | core promoter element around -30 of transcription start      |
| <i>CsDof13</i> | TATA-box    | 226            | 234           | core promoter element around -30 of transcription start      |
| <i>CsDof13</i> | TATA-box    | 237            | 245           | core promoter element around -30 of transcription start      |
| <i>CsDof13</i> | TATA-box    | 435            | 439           | core promoter element around -30 of transcription start      |
| <i>CsDof13</i> | TATA-box    | 447            | 451           | core promoter element around -30 of transcription start      |
| <i>CsDof13</i> | TATA-box    | 557            | 562           | core promoter element around -30 of transcription start      |
| <i>CsDof13</i> | TATA-box    | 558            | 562           | core promoter element around -30 of transcription start      |
| <i>CsDof13</i> | TATA-box    | 612            | 616           | core promoter element around -30 of transcription start      |
| <i>CsDof13</i> | TATA-box    | 850            | 856           | core promoter element around -30 of transcription start      |
| <i>CsDof13</i> | TATA-box    | 851            | 856           | core promoter element around -30 of transcription start      |
| <i>CsDof13</i> | TATA-box    | 852            | 856           | core promoter element around -30 of transcription start      |
| <i>CsDof13</i> | TATA-box    | 861            | 869           | core promoter element around -30 of transcription start      |
| <i>CsDof13</i> | TATA-box    | 872            | 878           | core promoter element around -30 of transcription start      |
| <i>CsDof13</i> | TATA-box    | 873            | 877           | core promoter element around -30 of transcription start      |
| <i>CsDof13</i> | TATA-box    | 1002           | 1008          | core promoter element around -30 of transcription start      |
| <i>CsDof13</i> | TATA-box    | 1003           | 1009          | core promoter element around -30 of transcription start      |
| <i>CsDof13</i> | TATA-box    | 1005           | 1009          | core promoter element around -30 of transcription start      |
| <i>CsDof13</i> | TATA-box    | 1017           | 1025          | core promoter element around -30 of transcription start      |
| <i>CsDof13</i> | TATA-box    | 1018           | 1025          | core promoter element around -30 of transcription start      |
| <i>CsDof13</i> | TATA-box    | 1019           | 1025          | core promoter element around -30 of transcription start      |
| <i>CsDof13</i> | TATA-box    | 1020           | 1025          | core promoter element around -30 of transcription start      |
| <i>CsDof13</i> | TATA-box    | 1021           | 1025          | core promoter element around -30 of transcription start      |
| <i>CsDof13</i> | TATA-box    | 1101           | 1105          | core promoter element around -30 of transcription start      |
| <i>CsDof13</i> | TATA-box    | 1108           | 1112          | core promoter element around -30 of transcription start      |
| <i>CsDof13</i> | TATA-box    | 1286           | 1293          | core promoter element around -30 of transcription start      |
| <i>CsDof13</i> | TATA-box    | 1287           | 1293          | core promoter element around -30 of transcription start      |
| <i>CsDof13</i> | TATA-box    | 1288           | 1294          | core promoter element around -30 of transcription start      |
| <i>CsDof13</i> | TATA-box    | 1289           | 1293          | core promoter element around -30 of transcription start      |
| <i>CsDof13</i> | TATA-box    | 1321           | 1327          | core promoter element around -30 of transcription start      |
| <i>CsDof13</i> | TATA-box    | 1322           | 1327          | core promoter element around -30 of transcription start      |
| <i>CsDof13</i> | TATA-box    | 1323           | 1327          | core promoter element around -30 of transcription start      |
| <i>CsDof13</i> | TATA-box    | 1538           | 1544          | core promoter element around -30 of transcription start      |
| <i>CsDof13</i> | TATA-box    | 1539           | 1545          | core promoter element around -30 of transcription start      |

| Name           | Cis-element     | Start position | Stop position | Function                                                             |
|----------------|-----------------|----------------|---------------|----------------------------------------------------------------------|
| <i>CsDof13</i> | TATA-box        | 1540           | 1546          | core promoter element around -30 of transcription start              |
| <i>CsDof13</i> | TATA-box        | 1541           | 1545          | core promoter element around -30 of transcription start              |
| <i>CsDof13</i> | TATA-box        | 1620           | 1624          | core promoter element around -30 of transcription start              |
| <i>CsDof13</i> | TATA-box        | 1627           | 1631          | core promoter element around -30 of transcription start              |
| <i>CsDof13</i> | TATA-box        | 1640           | 1644          | core promoter element around -30 of transcription start              |
| <i>CsDof13</i> | TATA-box        | 1722           | 1728          | core promoter element around -30 of transcription start              |
| <i>CsDof13</i> | TATA-box        | 1723           | 1729          | core promoter element around -30 of transcription start              |
| <i>CsDof13</i> | TATA-box        | 1724           | 1730          | core promoter element around -30 of transcription start              |
| <i>CsDof13</i> | TATA-box        | 1725           | 1729          | core promoter element around -30 of transcription start              |
| <i>CsDof13</i> | TATA-box        | 1792           | 1799          | core promoter element around -30 of transcription start              |
| <i>CsDof13</i> | TATA-box        | 1793           | 1799          | core promoter element around -30 of transcription start              |
| <i>CsDof13</i> | TATA-box        | 1794           | 1799          | core promoter element around -30 of transcription start              |
| <i>CsDof13</i> | TATA-box        | 1795           | 1799          | core promoter element around -30 of transcription start              |
| <i>CsDof13</i> | TATA-box        | 1849           | 1855          | core promoter element around -30 of transcription start              |
| <i>CsDof13</i> | TATA-box        | 1850           | 1854          | core promoter element around -30 of transcription start              |
| <i>CsDof13</i> | TATA-box        | 1885           | 1892          | core promoter element around -30 of transcription start              |
| <i>CsDof13</i> | TATA-box        | 1907           | 1915          | core promoter element around -30 of transcription start              |
| <i>CsDof13</i> | TATA-box        | 1910           | 1915          | core promoter element around -30 of transcription start              |
| <i>CsDof13</i> | TATA-box        | 1911           | 1915          | core promoter element around -30 of transcription start              |
| <i>CsDof13</i> | P-box           | 1514           | 1521          | gibberellin-responsive element                                       |
| <i>CsDof13</i> | AAAC-motif      | 1124           | 1135          | light responsive element                                             |
| <i>CsDof13</i> | MBS             | 1418           | 1424          | MYB binding site involved in drought-inducibility                    |
| <i>CsDof13</i> | MRE             | 1122           | 1129          | MYB binding site involved in light responsiveness                    |
| <i>CsDof14</i> | ABRE            | 1217           | 1222          | abscisic acid responsiveness                                         |
| <i>CsDof14</i> | TGA-element     | 1619           | 1625          | auxin-responsive element                                             |
| <i>CsDof14</i> | TGA-element     | 1973           | 1979          | auxin-responsive element                                             |
| <i>CsDof14</i> | AT-rich element | 691            | 701           | binding site of AT-rich DNA binding protein (ATBP-1)                 |
| <i>CsDof14</i> | AT-rich element | 1409           | 1419          | binding site of AT-rich DNA binding protein (ATBP-1)                 |
| <i>CsDof14</i> | ARE             | 221            | 227           | cis-acting regulatory element essential for the anaerobic induction  |
| <i>CsDof14</i> | ARE             | 1031           | 1037          | cis-acting regulatory element essential for the anaerobic induction  |
| <i>CsDof14</i> | ARE             | 1250           | 1256          | cis-acting regulatory element essential for the anaerobic induction  |
| <i>CsDof14</i> | ARE             | 1893           | 1899          | cis-acting regulatory element essential for the anaerobic induction  |
| <i>CsDof14</i> | circadian       | 1411           | 1420          | cis-acting regulatory element involved in circadian control          |
| <i>CsDof14</i> | G-box           | 1213           | 1219          | cis-acting regulatory element involved in light responsiveness       |
| <i>CsDof14</i> | G-box           | 1216           | 1222          | cis-acting regulatory element involved in light responsiveness       |
| <i>CsDof14</i> | TGACG-motif     | 1142           | 1147          | cis-acting regulatory element involved in the MeJA-responsiveness    |
| <i>CsDof14</i> | TGACG-motif     | 1863           | 1868          | cis-acting regulatory element involved in the MeJA-responsiveness    |
| <i>CsDof14</i> | CGTCA-motif     | 1142           | 1147          | cis-acting regulatory element involved in the MeJA-responsiveness    |
| <i>CsDof14</i> | CGTCA-motif     | 1863           | 1868          | cis-acting regulatory element involved in the MeJA-responsiveness    |
| <i>CsDof14</i> | O2-site         | 116            | 124           | cis-acting regulatory element involved in zein metabolism regulation |
| <i>CsDof14</i> | CAT-box         | 1076           | 1082          | cis-acting regulatory element related to meristem expression         |
| <i>CsDof14</i> | CAAT-box        | 38             | 43            | common cis-acting element in promoter and enhancer regions           |
| <i>CsDof14</i> | CAAT-box        | 117            | 122           | common cis-acting element in promoter and enhancer regions           |
| <i>CsDof14</i> | CAAT-box        | 249            | 254           | common cis-acting element in promoter and enhancer regions           |
| <i>CsDof14</i> | CAAT-box        | 290            | 295           | common cis-acting element in promoter and enhancer regions           |
| <i>CsDof14</i> | CAAT-box        | 465            | 470           | common cis-acting element in promoter and enhancer regions           |
| <i>CsDof14</i> | CAAT-box        | 592            | 597           | common cis-acting element in promoter and enhancer regions           |
| <i>CsDof14</i> | CAAT-box        | 659            | 664           | common cis-acting element in promoter and enhancer regions           |
| <i>CsDof14</i> | CAAT-box        | 694            | 699           | common cis-acting element in promoter and enhancer regions           |
| <i>CsDof14</i> | CAAT-box        | 711            | 720           | common cis-acting element in promoter and enhancer regions           |
| <i>CsDof14</i> | CAAT-box        | 713            | 718           | common cis-acting element in promoter and enhancer regions           |

| Name           | Cis-element | Start position | Stop position | Function                                                   |
|----------------|-------------|----------------|---------------|------------------------------------------------------------|
| <i>CsDof14</i> | CAAT-box    | 881            | 886           | common cis-acting element in promoter and enhancer regions |
| <i>CsDof14</i> | CAAT-box    | 1026           | 1031          | common cis-acting element in promoter and enhancer regions |
| <i>CsDof14</i> | CAAT-box    | 1059           | 1064          | common cis-acting element in promoter and enhancer regions |
| <i>CsDof14</i> | CAAT-box    | 1312           | 1317          | common cis-acting element in promoter and enhancer regions |
| <i>CsDof14</i> | CAAT-box    | 1325           | 1330          | common cis-acting element in promoter and enhancer regions |
| <i>CsDof14</i> | CAAT-box    | 1387           | 1392          | common cis-acting element in promoter and enhancer regions |
| <i>CsDof14</i> | CAAT-box    | 1407           | 1412          | common cis-acting element in promoter and enhancer regions |
| <i>CsDof14</i> | CAAT-box    | 1433           | 1438          | common cis-acting element in promoter and enhancer regions |
| <i>CsDof14</i> | CAAT-box    | 1493           | 1498          | common cis-acting element in promoter and enhancer regions |
| <i>CsDof14</i> | CAAT-box    | 1728           | 1733          | common cis-acting element in promoter and enhancer regions |
| <i>CsDof14</i> | CAAT-box    | 1818           | 1823          | common cis-acting element in promoter and enhancer regions |
| <i>CsDof14</i> | CAAT-box    | 1956           | 1961          | common cis-acting element in promoter and enhancer regions |
| <i>CsDof14</i> | TATA-box    | 99             | 105           | core promoter element around -30 of transcription start    |
| <i>CsDof14</i> | TATA-box    | 101            | 105           | core promoter element around -30 of transcription start    |
| <i>CsDof14</i> | TATA-box    | 137            | 143           | core promoter element around -30 of transcription start    |
| <i>CsDof14</i> | TATA-box    | 139            | 145           | core promoter element around -30 of transcription start    |
| <i>CsDof14</i> | TATA-box    | 141            | 145           | core promoter element around -30 of transcription start    |
| <i>CsDof14</i> | TATA-box    | 266            | 270           | core promoter element around -30 of transcription start    |
| <i>CsDof14</i> | TATA-box    | 426            | 432           | core promoter element around -30 of transcription start    |
| <i>CsDof14</i> | TATA-box    | 427            | 433           | core promoter element around -30 of transcription start    |
| <i>CsDof14</i> | TATA-box    | 428            | 432           | core promoter element around -30 of transcription start    |
| <i>CsDof14</i> | TATA-box    | 727            | 733           | core promoter element around -30 of transcription start    |
| <i>CsDof14</i> | TATA-box    | 729            | 733           | core promoter element around -30 of transcription start    |
| <i>CsDof14</i> | TATA-box    | 856            | 861           | core promoter element around -30 of transcription start    |
| <i>CsDof14</i> | TATA-box    | 857            | 861           | core promoter element around -30 of transcription start    |
| <i>CsDof14</i> | TATA-box    | 1368           | 1373          | core promoter element around -30 of transcription start    |
| <i>CsDof14</i> | TATA-box    | 1369           | 1373          | core promoter element around -30 of transcription start    |
| <i>CsDof14</i> | TATA-box    | 1428           | 1434          | core promoter element around -30 of transcription start    |
| <i>CsDof14</i> | TATA-box    | 1429           | 1434          | core promoter element around -30 of transcription start    |
| <i>CsDof14</i> | TATA-box    | 1430           | 1434          | core promoter element around -30 of transcription start    |
| <i>CsDof14</i> | TATA-box    | 1456           | 1462          | core promoter element around -30 of transcription start    |
| <i>CsDof14</i> | TATA-box    | 1457           | 1462          | core promoter element around -30 of transcription start    |
| <i>CsDof14</i> | TATA-box    | 1458           | 1462          | core promoter element around -30 of transcription start    |
| <i>CsDof14</i> | TATA-box    | 1498           | 1504          | core promoter element around -30 of transcription start    |
| <i>CsDof14</i> | TATA-box    | 1499           | 1503          | core promoter element around -30 of transcription start    |
| <i>CsDof14</i> | TATA-box    | 1522           | 1528          | core promoter element around -30 of transcription start    |
| <i>CsDof14</i> | TATA-box    | 1523           | 1528          | core promoter element around -30 of transcription start    |
| <i>CsDof14</i> | TATA-box    | 1524           | 1528          | core promoter element around -30 of transcription start    |
| <i>CsDof14</i> | TATA-box    | 1543           | 1551          | core promoter element around -30 of transcription start    |
| <i>CsDof14</i> | TATA-box    | 1549           | 1553          | core promoter element around -30 of transcription start    |
| <i>CsDof14</i> | TATA-box    | 1614           | 1619          | core promoter element around -30 of transcription start    |
| <i>CsDof14</i> | TATA-box    | 1615           | 1619          | core promoter element around -30 of transcription start    |
| <i>CsDof14</i> | TATA-box    | 1731           | 1737          | core promoter element around -30 of transcription start    |
| <i>CsDof14</i> | TATA-box    | 1732           | 1737          | core promoter element around -30 of transcription start    |
| <i>CsDof14</i> | TATA-box    | 1733           | 1737          | core promoter element around -30 of transcription start    |
| <i>CsDof14</i> | TATA-box    | 1837           | 1843          | core promoter element around -30 of transcription start    |
| <i>CsDof14</i> | TATA-box    | 1838           | 1842          | core promoter element around -30 of transcription start    |
| <i>CsDof14</i> | TATA-box    | 1886           | 1892          | core promoter element around -30 of transcription start    |
| <i>CsDof14</i> | TATA-box    | 1887           | 1893          | core promoter element around -30 of transcription start    |
| <i>CsDof14</i> | TATA-box    | 1888           | 1892          | core promoter element around -30 of transcription start    |
| <i>CsDof14</i> | TATA-box    | 1996           | 2001          | core promoter element around -30 of transcription start    |



| Name           | Cis-element        | Start position | Stop position | Function                                                            |
|----------------|--------------------|----------------|---------------|---------------------------------------------------------------------|
| <i>CsDof14</i> | TATA-box           | 1997           | 2001          | core promoter element around -30 of transcription start             |
| <i>CsDof14</i> | HD-Zip 1           | 291            | 299           | element involved in differentiation of the palisade mesophyll cells |
| <i>CsDof14</i> | GARE-motif         | 501            | 508           | gibberellin-responsive element                                      |
| <i>CsDof14</i> | GARE-motif         | 516            | 523           | gibberellin-responsive element                                      |
| <i>CsDof14</i> | 3-AF1 binding site | 1507           | 1517          | light responsive element                                            |
| <i>CsDof14</i> | GT1-motif          | 450            | 456           | light responsive element                                            |
| <i>CsDof14</i> | GT1-motif          | 746            | 752           | light responsive element                                            |
| <i>CsDof14</i> | MBS                | 682            | 688           | MYB binding site involved in drought-inducibility                   |
| <i>CsDof14</i> | MBS                | 733            | 739           | MYB binding site involved in drought-inducibility                   |
| <i>CsDof14</i> | MBS                | 1122           | 1128          | MYB binding site involved in drought-inducibility                   |
| <i>CsDof15</i> | ACE                | 161            | 170           | cis-acting element involved in light responsiveness                 |
| <i>CsDof15</i> | LTR                | 1021           | 1027          | cis-acting element involved in low-temperature responsiveness       |
| <i>CsDof15</i> | TCA-element        | 1875           | 1884          | cis-acting element involved in salicylic acid responsiveness        |
| <i>CsDof15</i> | ARE                | 523            | 529           | cis-acting regulatory element essential for the anaerobic induction |
| <i>CsDof15</i> | ARE                | 1364           | 1370          | cis-acting regulatory element essential for the anaerobic induction |
| <i>CsDof15</i> | ARE                | 1516           | 1522          | cis-acting regulatory element essential for the anaerobic induction |
| <i>CsDof15</i> | CGTCA-motif        | 380            | 385           | cis-acting regulatory element involved in the MeJA-responsiveness   |
| <i>CsDof15</i> | CGTCA-motif        | 514            | 519           | cis-acting regulatory element involved in the MeJA-responsiveness   |
| <i>CsDof15</i> | CGTCA-motif        | 590            | 595           | cis-acting regulatory element involved in the MeJA-responsiveness   |
| <i>CsDof15</i> | TGACG-motif        | 380            | 385           | cis-acting regulatory element involved in the MeJA-responsiveness   |
| <i>CsDof15</i> | TGACG-motif        | 514            | 519           | cis-acting regulatory element involved in the MeJA-responsiveness   |
| <i>CsDof15</i> | TGACG-motif        | 590            | 595           | cis-acting regulatory element involved in the MeJA-responsiveness   |
| <i>CsDof15</i> | CAAT-box           | 176            | 181           | common cis-acting element in promoter and enhancer regions          |
| <i>CsDof15</i> | CAAT-box           | 218            | 223           | common cis-acting element in promoter and enhancer regions          |
| <i>CsDof15</i> | CAAT-box           | 434            | 439           | common cis-acting element in promoter and enhancer regions          |
| <i>CsDof15</i> | CAAT-box           | 455            | 460           | common cis-acting element in promoter and enhancer regions          |
| <i>CsDof15</i> | CAAT-box           | 812            | 817           | common cis-acting element in promoter and enhancer regions          |
| <i>CsDof15</i> | CAAT-box           | 820            | 825           | common cis-acting element in promoter and enhancer regions          |
| <i>CsDof15</i> | CAAT-box           | 855            | 860           | common cis-acting element in promoter and enhancer regions          |
| <i>CsDof15</i> | CAAT-box           | 903            | 908           | common cis-acting element in promoter and enhancer regions          |
| <i>CsDof15</i> | CAAT-box           | 980            | 985           | common cis-acting element in promoter and enhancer regions          |
| <i>CsDof15</i> | CAAT-box           | 1155           | 1160          | common cis-acting element in promoter and enhancer regions          |
| <i>CsDof15</i> | CAAT-box           | 1608           | 1613          | common cis-acting element in promoter and enhancer regions          |
| <i>CsDof15</i> | CAAT-box           | 1806           | 1811          | common cis-acting element in promoter and enhancer regions          |
| <i>CsDof15</i> | CAAT-box           | 1862           | 1867          | common cis-acting element in promoter and enhancer regions          |
| <i>CsDof15</i> | TATA-box           | 29             | 33            | core promoter element around -30 of transcription start             |
| <i>CsDof15</i> | TATA-box           | 44             | 50            | core promoter element around -30 of transcription start             |
| <i>CsDof15</i> | TATA-box           | 45             | 50            | core promoter element around -30 of transcription start             |
| <i>CsDof15</i> | TATA-box           | 46             | 50            | core promoter element around -30 of transcription start             |
| <i>CsDof15</i> | TATA-box           | 148            | 152           | core promoter element around -30 of transcription start             |
| <i>CsDof15</i> | TATA-box           | 349            | 355           | core promoter element around -30 of transcription start             |
| <i>CsDof15</i> | TATA-box           | 350            | 355           | core promoter element around -30 of transcription start             |
| <i>CsDof15</i> | TATA-box           | 351            | 355           | core promoter element around -30 of transcription start             |
| <i>CsDof15</i> | TATA-box           | 578            | 585           | core promoter element around -30 of transcription start             |
| <i>CsDof15</i> | TATA-box           | 655            | 659           | core promoter element around -30 of transcription start             |
| <i>CsDof15</i> | TATA-box           | 860            | 867           | core promoter element around -30 of transcription start             |
| <i>CsDof15</i> | TATA-box           | 1067           | 1075          | core promoter element around -30 of transcription start             |
| <i>CsDof15</i> | TATA-box           | 1143           | 1147          | core promoter element around -30 of transcription start             |
| <i>CsDof15</i> | TATA-box           | 1191           | 1195          | core promoter element around -30 of transcription start             |
| <i>CsDof15</i> | TATA-box           | 1240           | 1245          | core promoter element around -30 of transcription start             |
| <i>CsDof15</i> | TATA-box           | 1241           | 1245          | core promoter element around -30 of transcription start             |

| Name           | Cis-element        | Start position | Stop position | Function                                                             |
|----------------|--------------------|----------------|---------------|----------------------------------------------------------------------|
| <i>CsDof15</i> | TATA-box           | 1366           | 1375          | core promoter element around -30 of transcription start              |
| <i>CsDof15</i> | TATA-box           | 1367           | 1374          | core promoter element around -30 of transcription start              |
| <i>CsDof15</i> | TATA-box           | 1368           | 1374          | core promoter element around -30 of transcription start              |
| <i>CsDof15</i> | TATA-box           | 1369           | 1376          | core promoter element around -30 of transcription start              |
| <i>CsDof15</i> | TATA-box           | 1370           | 1376          | core promoter element around -30 of transcription start              |
| <i>CsDof15</i> | TATA-box           | 1371           | 1377          | core promoter element around -30 of transcription start              |
| <i>CsDof15</i> | TATA-box           | 1372           | 1376          | core promoter element around -30 of transcription start              |
| <i>CsDof15</i> | TATA-box           | 1418           | 1426          | core promoter element around -30 of transcription start              |
| <i>CsDof15</i> | TATA-box           | 1425           | 1431          | core promoter element around -30 of transcription start              |
| <i>CsDof15</i> | TATA-box           | 1426           | 1431          | core promoter element around -30 of transcription start              |
| <i>CsDof15</i> | TATA-box           | 1427           | 1431          | core promoter element around -30 of transcription start              |
| <i>CsDof15</i> | TATA-box           | 1461           | 1468          | core promoter element around -30 of transcription start              |
| <i>CsDof15</i> | TATA-box           | 1462           | 1468          | core promoter element around -30 of transcription start              |
| <i>CsDof15</i> | TATA-box           | 1463           | 1469          | core promoter element around -30 of transcription start              |
| <i>CsDof15</i> | TATA-box           | 1464           | 1470          | core promoter element around -30 of transcription start              |
| <i>CsDof15</i> | TATA-box           | 1465           | 1471          | core promoter element around -30 of transcription start              |
| <i>CsDof15</i> | TATA-box           | 1466           | 1470          | core promoter element around -30 of transcription start              |
| <i>CsDof15</i> | TATA-box           | 1561           | 1568          | core promoter element around -30 of transcription start              |
| <i>CsDof15</i> | TATA-box           | 1643           | 1647          | core promoter element around -30 of transcription start              |
| <i>CsDof15</i> | TATA-box           | 1686           | 1690          | core promoter element around -30 of transcription start              |
| <i>CsDof15</i> | TATA-box           | 1709           | 1715          | core promoter element around -30 of transcription start              |
| <i>CsDof15</i> | TATA-box           | 1710           | 1714          | core promoter element around -30 of transcription start              |
| <i>CsDof15</i> | TATA-box           | 1840           | 1844          | core promoter element around -30 of transcription start              |
| <i>CsDof15</i> | TATA-box           | 1908           | 1917          | core promoter element around -30 of transcription start              |
| <i>CsDof15</i> | P-box              | 966            | 973           | gibberellin-responsive element                                       |
| <i>CsDof15</i> | GT1-motif          | 876            | 882           | light responsive element                                             |
| <i>CsDof15</i> | 3-AF1 binding site | 1899           | 1909          | light responsive element                                             |
| <i>CsDof15</i> | MBSI               | 1491           | 1501.5        | MYB binding site involved in flavonoid biosynthetic genes regulation |
| <i>CsDof15</i> | MRE                | 1038           | 1045          | MYB binding site involved in light responsiveness                    |
| <i>CsDof15</i> | MRE                | 1170           | 1177          | MYB binding site involved in light responsiveness                    |
| <i>CsDof15</i> | WUN-motif          | 1339           | 1348          | wound-responsive element                                             |
| <i>CsDof16</i> | ABRE               | 502            | 509           | abscisic acid responsiveness                                         |
| <i>CsDof16</i> | ABRE               | 1017           | 1022          | abscisic acid responsiveness                                         |
| <i>CsDof16</i> | ABRE               | 1757           | 1762          | abscisic acid responsiveness                                         |
| <i>CsDof16</i> | LTR                | 1577           | 1583          | cis-acting element involved in low-temperature responsiveness        |
| <i>CsDof16</i> | ARE                | 1520           | 1526          | cis-acting regulatory element essential for the anaerobic induction  |
| <i>CsDof16</i> | circadian          | 553            | 562           | cis-acting regulatory element involved in circadian control          |
| <i>CsDof16</i> | G-box              | 778            | 784           | cis-acting regulatory element involved in light responsiveness       |
| <i>CsDof16</i> | G-Box              | 1016           | 1022          | cis-acting regulatory element involved in light responsiveness       |
| <i>CsDof16</i> | G-Box              | 1757           | 1763          | cis-acting regulatory element involved in light responsiveness       |
| <i>CsDof16</i> | TGACG-motif        | 547            | 552           | cis-acting regulatory element involved in the MeJA-responsiveness    |
| <i>CsDof16</i> | CGTCA-motif        | 547            | 552           | cis-acting regulatory element involved in the MeJA-responsiveness    |
| <i>CsDof16</i> | O2-site            | 871            | 881           | cis-acting regulatory element involved in zein metabolism regulation |
| <i>CsDof16</i> | CAAT-box           | 86             | 91            | common cis-acting element in promoter and enhancer regions           |
| <i>CsDof16</i> | CAAT-box           | 482            | 487           | common cis-acting element in promoter and enhancer regions           |
| <i>CsDof16</i> | CAAT-box           | 541            | 546           | common cis-acting element in promoter and enhancer regions           |
| <i>CsDof16</i> | CAAT-box           | 616            | 621           | common cis-acting element in promoter and enhancer regions           |
| <i>CsDof16</i> | CAAT-box           | 642            | 647           | common cis-acting element in promoter and enhancer regions           |
| <i>CsDof16</i> | CAAT-box           | 796            | 801           | common cis-acting element in promoter and enhancer regions           |
| <i>CsDof16</i> | CAAT-box           | 906            | 911           | common cis-acting element in promoter and enhancer regions           |
| <i>CsDof16</i> | CAAT-box           | 1324           | 1329          | common cis-acting element in promoter and enhancer regions           |

| Name           | Cis-element | Start position | Stop position | Function                                                   |
|----------------|-------------|----------------|---------------|------------------------------------------------------------|
| <i>CsDof16</i> | CAAT-box    | 1550           | 1555          | common cis-acting element in promoter and enhancer regions |
| <i>CsDof16</i> | CAAT-box    | 1642           | 1647          | common cis-acting element in promoter and enhancer regions |
| <i>CsDof16</i> | CAAT-box    | 1840           | 1845          | common cis-acting element in promoter and enhancer regions |
| <i>CsDof16</i> | TATA-box    | 2              | 9             | core promoter element around -30 of transcription start    |
| <i>CsDof16</i> | TATA-box    | 160            | 164           | core promoter element around -30 of transcription start    |
| <i>CsDof16</i> | TATA-box    | 349            | 353           | core promoter element around -30 of transcription start    |
| <i>CsDof16</i> | TATA-box    | 558            | 564           | core promoter element around -30 of transcription start    |
| <i>CsDof16</i> | TATA-box    | 559            | 563           | core promoter element around -30 of transcription start    |
| <i>CsDof16</i> | TATA-box    | 565            | 571           | core promoter element around -30 of transcription start    |
| <i>CsDof16</i> | TATA-box    | 567            | 573           | core promoter element around -30 of transcription start    |
| <i>CsDof16</i> | TATA-box    | 568            | 574           | core promoter element around -30 of transcription start    |
| <i>CsDof16</i> | TATA-box    | 569            | 575           | core promoter element around -30 of transcription start    |
| <i>CsDof16</i> | TATA-box    | 570            | 576           | core promoter element around -30 of transcription start    |
| <i>CsDof16</i> | TATA-box    | 571            | 577           | core promoter element around -30 of transcription start    |
| <i>CsDof16</i> | TATA-box    | 572            | 578           | core promoter element around -30 of transcription start    |
| <i>CsDof16</i> | TATA-box    | 573            | 579           | core promoter element around -30 of transcription start    |
| <i>CsDof16</i> | TATA-box    | 574            | 580           | core promoter element around -30 of transcription start    |
| <i>CsDof16</i> | TATA-box    | 575            | 581           | core promoter element around -30 of transcription start    |
| <i>CsDof16</i> | TATA-box    | 576            | 582           | core promoter element around -30 of transcription start    |
| <i>CsDof16</i> | TATA-box    | 577            | 583           | core promoter element around -30 of transcription start    |
| <i>CsDof16</i> | TATA-box    | 578            | 584           | core promoter element around -30 of transcription start    |
| <i>CsDof16</i> | TATA-box    | 579            | 583           | core promoter element around -30 of transcription start    |
| <i>CsDof16</i> | TATA-box    | 588            | 594           | core promoter element around -30 of transcription start    |
| <i>CsDof16</i> | TATA-box    | 589            | 593           | core promoter element around -30 of transcription start    |
| <i>CsDof16</i> | TATA-box    | 668            | 674           | core promoter element around -30 of transcription start    |
| <i>CsDof16</i> | TATA-box    | 669            | 675           | core promoter element around -30 of transcription start    |
| <i>CsDof16</i> | TATA-box    | 670            | 674           | core promoter element around -30 of transcription start    |
| <i>CsDof16</i> | TATA-box    | 693            | 700           | core promoter element around -30 of transcription start    |
| <i>CsDof16</i> | TATA-box    | 897            | 903           | core promoter element around -30 of transcription start    |
| <i>CsDof16</i> | TATA-box    | 898            | 904           | core promoter element around -30 of transcription start    |
| <i>CsDof16</i> | TATA-box    | 899            | 905           | core promoter element around -30 of transcription start    |
| <i>CsDof16</i> | TATA-box    | 900            | 904           | core promoter element around -30 of transcription start    |
| <i>CsDof16</i> | TATA-box    | 928            | 932           | core promoter element around -30 of transcription start    |
| <i>CsDof16</i> | TATA-box    | 941            | 948           | core promoter element around -30 of transcription start    |
| <i>CsDof16</i> | TATA-box    | 966            | 971           | core promoter element around -30 of transcription start    |
| <i>CsDof16</i> | TATA-box    | 967            | 971           | core promoter element around -30 of transcription start    |
| <i>CsDof16</i> | TATA-box    | 1001           | 1007          | core promoter element around -30 of transcription start    |
| <i>CsDof16</i> | TATA-box    | 1002           | 1007          | core promoter element around -30 of transcription start    |
| <i>CsDof16</i> | TATA-box    | 1003           | 1007          | core promoter element around -30 of transcription start    |
| <i>CsDof16</i> | TATA-box    | 1069           | 1075          | core promoter element around -30 of transcription start    |
| <i>CsDof16</i> | TATA-box    | 1070           | 1077          | core promoter element around -30 of transcription start    |
| <i>CsDof16</i> | TATA-box    | 1071           | 1077          | core promoter element around -30 of transcription start    |
| <i>CsDof16</i> | TATA-box    | 1073           | 1077          | core promoter element around -30 of transcription start    |
| <i>CsDof16</i> | TATA-box    | 1078           | 1084          | core promoter element around -30 of transcription start    |
| <i>CsDof16</i> | TATA-box    | 1079           | 1085          | core promoter element around -30 of transcription start    |
| <i>CsDof16</i> | TATA-box    | 1080           | 1086          | core promoter element around -30 of transcription start    |
| <i>CsDof16</i> | TATA-box    | 1081           | 1087          | core promoter element around -30 of transcription start    |
| <i>CsDof16</i> | TATA-box    | 1083           | 1087          | core promoter element around -30 of transcription start    |
| <i>CsDof16</i> | TATA-box    | 1221           | 1230          | core promoter element around -30 of transcription start    |
| <i>CsDof16</i> | TATA-box    | 1387           | 1395          | core promoter element around -30 of transcription start    |
| <i>CsDof16</i> | TATA-box    | 1388           | 1395          | core promoter element around -30 of transcription start    |

| Name           | Cis-element     | Start position | Stop position | Function                                                             |
|----------------|-----------------|----------------|---------------|----------------------------------------------------------------------|
| <i>CsDof16</i> | TATA-box        | 1389           | 1395          | core promoter element around -30 of transcription start              |
| <i>CsDof16</i> | TATA-box        | 1390           | 1395          | core promoter element around -30 of transcription start              |
| <i>CsDof16</i> | TATA-box        | 1391           | 1395          | core promoter element around -30 of transcription start              |
| <i>CsDof16</i> | TATA-box        | 1479           | 1488          | core promoter element around -30 of transcription start              |
| <i>CsDof16</i> | TATA-box        | 1480           | 1487          | core promoter element around -30 of transcription start              |
| <i>CsDof16</i> | TATA-box        | 1481           | 1487          | core promoter element around -30 of transcription start              |
| <i>CsDof16</i> | TATA-box        | 1482           | 1487          | core promoter element around -30 of transcription start              |
| <i>CsDof16</i> | TATA-box        | 1483           | 1487          | core promoter element around -30 of transcription start              |
| <i>CsDof16</i> | TATA-box        | 1499           | 1504          | core promoter element around -30 of transcription start              |
| <i>CsDof16</i> | TATA-box        | 1500           | 1504          | core promoter element around -30 of transcription start              |
| <i>CsDof16</i> | TATA-box        | 1512           | 1518          | core promoter element around -30 of transcription start              |
| <i>CsDof16</i> | TATA-box        | 1513           | 1517          | core promoter element around -30 of transcription start              |
| <i>CsDof16</i> | TATA-box        | 1628           | 1632          | core promoter element around -30 of transcription start              |
| <i>CsDof16</i> | TATA-box        | 1632           | 1641          | core promoter element around -30 of transcription start              |
| <i>CsDof16</i> | TATA-box        | 1633           | 1639          | core promoter element around -30 of transcription start              |
| <i>CsDof16</i> | TATA-box        | 1634           | 1641          | core promoter element around -30 of transcription start              |
| <i>CsDof16</i> | TATA-box        | 1635           | 1641          | core promoter element around -30 of transcription start              |
| <i>CsDof16</i> | TATA-box        | 1636           | 1642          | core promoter element around -30 of transcription start              |
| <i>CsDof16</i> | TATA-box        | 1637           | 1641          | core promoter element around -30 of transcription start              |
| <i>CsDof16</i> | TATA-box        | 1701           | 1709          | core promoter element around -30 of transcription start              |
| <i>CsDof16</i> | TATA-box        | 1815           | 1821          | core promoter element around -30 of transcription start              |
| <i>CsDof16</i> | TATA-box        | 1816           | 1820          | core promoter element around -30 of transcription start              |
| <i>CsDof16</i> | TATA-box        | 1872           | 1878          | core promoter element around -30 of transcription start              |
| <i>CsDof16</i> | TATA-box        | 1873           | 1879          | core promoter element around -30 of transcription start              |
| <i>CsDof16</i> | TATA-box        | 1874           | 1880          | core promoter element around -30 of transcription start              |
| <i>CsDof16</i> | TATA-box        | 1876           | 1880          | core promoter element around -30 of transcription start              |
| <i>CsDof16</i> | CCAAT-box       | 1540           | 1546          | MYBHv1 binding site                                                  |
| <i>CsDof17</i> | ABRE            | 159            | 165           | abscisic acid responsiveness                                         |
| <i>CsDof17</i> | ABRE            | 160            | 165           | abscisic acid responsiveness                                         |
| <i>CsDof17</i> | ABRE            | 267            | 272           | abscisic acid responsiveness                                         |
| <i>CsDof17</i> | ABRE            | 395            | 400           | abscisic acid responsiveness                                         |
| <i>CsDof17</i> | ABRE            | 1826           | 1831          | abscisic acid responsiveness                                         |
| <i>CsDof17</i> | TGA-element     | 1494           | 1500          | auxin-responsive element                                             |
| <i>CsDof17</i> | TC-rich repeats | 383            | 392           | cis-acting element involved in defense and stress responsiveness     |
| <i>CsDof17</i> | TCA-element     | 219            | 228           | cis-acting element involved in salicylic acid responsiveness         |
| <i>CsDof17</i> | TCA-element     | 1930           | 1939          | cis-acting element involved in salicylic acid responsiveness         |
| <i>CsDof17</i> | ARE             | 1094           | 1100          | cis-acting regulatory element essential for the anaerobic induction  |
| <i>CsDof17</i> | ARE             | 1509           | 1515          | cis-acting regulatory element essential for the anaerobic induction  |
| <i>CsDof17</i> | G-box           | 159            | 165           | cis-acting regulatory element involved in light responsiveness       |
| <i>CsDof17</i> | G-box           | 395            | 401           | cis-acting regulatory element involved in light responsiveness       |
| <i>CsDof17</i> | G-box           | 1825           | 1831          | cis-acting regulatory element involved in light responsiveness       |
| <i>CsDof17</i> | G-Box           | 159            | 165           | cis-acting regulatory element involved in light responsiveness       |
| <i>CsDof17</i> | G-Box           | 266            | 272           | cis-acting regulatory element involved in light responsiveness       |
| <i>CsDof17</i> | G-Box           | 1318           | 1328          | cis-acting regulatory element involved in light responsiveness       |
| <i>CsDof17</i> | CGTCA-motif     | 397            | 402           | cis-acting regulatory element involved in the MeJA-responsiveness    |
| <i>CsDof17</i> | CGTCA-motif     | 1824           | 1829          | cis-acting regulatory element involved in the MeJA-responsiveness    |
| <i>CsDof17</i> | TGACG-motif     | 397            | 402           | cis-acting regulatory element involved in the MeJA-responsiveness    |
| <i>CsDof17</i> | TGACG-motif     | 1824           | 1829          | cis-acting regulatory element involved in the MeJA-responsiveness    |
| <i>CsDof17</i> | O2-site         | 1151           | 1160          | cis-acting regulatory element involved in zein metabolism regulation |
| <i>CsDof17</i> | CAAT-box        | 42             | 47            | common cis-acting element in promoter and enhancer regions           |
| <i>CsDof17</i> | CAAT-box        | 308            | 313           | common cis-acting element in promoter and enhancer regions           |

| Name           | Cis-element | Start position | Stop position | Function                                                   |
|----------------|-------------|----------------|---------------|------------------------------------------------------------|
| <i>CsDof17</i> | CAAT-box    | 329            | 334           | common cis-acting element in promoter and enhancer regions |
| <i>CsDof17</i> | CAAT-box    | 380            | 385           | common cis-acting element in promoter and enhancer regions |
| <i>CsDof17</i> | CAAT-box    | 449            | 454           | common cis-acting element in promoter and enhancer regions |
| <i>CsDof17</i> | CAAT-box    | 472            | 477           | common cis-acting element in promoter and enhancer regions |
| <i>CsDof17</i> | CAAT-box    | 659            | 664           | common cis-acting element in promoter and enhancer regions |
| <i>CsDof17</i> | CAAT-box    | 670            | 675           | common cis-acting element in promoter and enhancer regions |
| <i>CsDof17</i> | CAAT-box    | 689            | 694           | common cis-acting element in promoter and enhancer regions |
| <i>CsDof17</i> | CAAT-box    | 743            | 748           | common cis-acting element in promoter and enhancer regions |
| <i>CsDof17</i> | CAAT-box    | 785            | 790           | common cis-acting element in promoter and enhancer regions |
| <i>CsDof17</i> | CAAT-box    | 811            | 816           | common cis-acting element in promoter and enhancer regions |
| <i>CsDof17</i> | CAAT-box    | 900            | 905           | common cis-acting element in promoter and enhancer regions |
| <i>CsDof17</i> | CAAT-box    | 1059           | 1064          | common cis-acting element in promoter and enhancer regions |
| <i>CsDof17</i> | CAAT-box    | 1092           | 1097          | common cis-acting element in promoter and enhancer regions |
| <i>CsDof17</i> | CAAT-box    | 1119           | 1124          | common cis-acting element in promoter and enhancer regions |
| <i>CsDof17</i> | CAAT-box    | 1144           | 1149          | common cis-acting element in promoter and enhancer regions |
| <i>CsDof17</i> | CAAT-box    | 1204           | 1209          | common cis-acting element in promoter and enhancer regions |
| <i>CsDof17</i> | CAAT-box    | 1213           | 1218          | common cis-acting element in promoter and enhancer regions |
| <i>CsDof17</i> | CAAT-box    | 1248           | 1253          | common cis-acting element in promoter and enhancer regions |
| <i>CsDof17</i> | CAAT-box    | 1433           | 1438          | common cis-acting element in promoter and enhancer regions |
| <i>CsDof17</i> | CAAT-box    | 1601           | 1606          | common cis-acting element in promoter and enhancer regions |
| <i>CsDof17</i> | CAAT-box    | 1812           | 1817          | common cis-acting element in promoter and enhancer regions |
| <i>CsDof17</i> | TATA-box    | 2              | 10            | core promoter element around -30 of transcription start    |
| <i>CsDof17</i> | TATA-box    | 66             | 73            | core promoter element around -30 of transcription start    |
| <i>CsDof17</i> | TATA-box    | 67             | 73            | core promoter element around -30 of transcription start    |
| <i>CsDof17</i> | TATA-box    | 68             | 73            | core promoter element around -30 of transcription start    |
| <i>CsDof17</i> | TATA-box    | 69             | 73            | core promoter element around -30 of transcription start    |
| <i>CsDof17</i> | TATA-box    | 83             | 90            | core promoter element around -30 of transcription start    |
| <i>CsDof17</i> | TATA-box    | 84             | 90            | core promoter element around -30 of transcription start    |
| <i>CsDof17</i> | TATA-box    | 85             | 90            | core promoter element around -30 of transcription start    |
| <i>CsDof17</i> | TATA-box    | 86             | 90            | core promoter element around -30 of transcription start    |
| <i>CsDof17</i> | TATA-box    | 521            | 530           | core promoter element around -30 of transcription start    |
| <i>CsDof17</i> | TATA-box    | 527            | 531           | core promoter element around -30 of transcription start    |
| <i>CsDof17</i> | TATA-box    | 530            | 536           | core promoter element around -30 of transcription start    |
| <i>CsDof17</i> | TATA-box    | 531            | 536           | core promoter element around -30 of transcription start    |
| <i>CsDof17</i> | TATA-box    | 532            | 536           | core promoter element around -30 of transcription start    |
| <i>CsDof17</i> | TATA-box    | 541            | 545           | core promoter element around -30 of transcription start    |
| <i>CsDof17</i> | TATA-box    | 558            | 564           | core promoter element around -30 of transcription start    |
| <i>CsDof17</i> | TATA-box    | 559            | 565           | core promoter element around -30 of transcription start    |
| <i>CsDof17</i> | TATA-box    | 561            | 565           | core promoter element around -30 of transcription start    |
| <i>CsDof17</i> | TATA-box    | 682            | 688           | core promoter element around -30 of transcription start    |
| <i>CsDof17</i> | TATA-box    | 683            | 687           | core promoter element around -30 of transcription start    |
| <i>CsDof17</i> | TATA-box    | 700            | 709           | core promoter element around -30 of transcription start    |
| <i>CsDof17</i> | TATA-box    | 702            | 710           | core promoter element around -30 of transcription start    |
| <i>CsDof17</i> | TATA-box    | 708            | 712           | core promoter element around -30 of transcription start    |
| <i>CsDof17</i> | TATA-box    | 798            | 804           | core promoter element around -30 of transcription start    |
| <i>CsDof17</i> | TATA-box    | 799            | 803           | core promoter element around -30 of transcription start    |
| <i>CsDof17</i> | TATA-box    | 876            | 880           | core promoter element around -30 of transcription start    |
| <i>CsDof17</i> | TATA-box    | 984            | 993           | core promoter element around -30 of transcription start    |
| <i>CsDof17</i> | TATA-box    | 985            | 992           | core promoter element around -30 of transcription start    |
| <i>CsDof17</i> | TATA-box    | 986            | 992           | core promoter element around -30 of transcription start    |
| <i>CsDof17</i> | TATA-box    | 987            | 992           | core promoter element around -30 of transcription start    |

| Name           | Cis-element | Start position | Stop position | Function                                                            |
|----------------|-------------|----------------|---------------|---------------------------------------------------------------------|
| <i>CsDof17</i> | TATA-box    | 988            | 992           | core promoter element around -30 of transcription start             |
| <i>CsDof17</i> | TATA-box    | 1072           | 1080          | core promoter element around -30 of transcription start             |
| <i>CsDof17</i> | TATA-box    | 1075           | 1080          | core promoter element around -30 of transcription start             |
| <i>CsDof17</i> | TATA-box    | 1076           | 1080          | core promoter element around -30 of transcription start             |
| <i>CsDof17</i> | TATA-box    | 1131           | 1135          | core promoter element around -30 of transcription start             |
| <i>CsDof17</i> | TATA-box    | 1241           | 1246          | core promoter element around -30 of transcription start             |
| <i>CsDof17</i> | TATA-box    | 1242           | 1246          | core promoter element around -30 of transcription start             |
| <i>CsDof17</i> | TATA-box    | 1253           | 1260          | core promoter element around -30 of transcription start             |
| <i>CsDof17</i> | TATA-box    | 1356           | 1362          | core promoter element around -30 of transcription start             |
| <i>CsDof17</i> | TATA-box    | 1357           | 1361          | core promoter element around -30 of transcription start             |
| <i>CsDof17</i> | TATA-box    | 1410           | 1416          | core promoter element around -30 of transcription start             |
| <i>CsDof17</i> | TATA-box    | 1411           | 1415          | core promoter element around -30 of transcription start             |
| <i>CsDof17</i> | TATA-box    | 1553           | 1562          | core promoter element around -30 of transcription start             |
| <i>CsDof17</i> | TATA-box    | 1554           | 1561          | core promoter element around -30 of transcription start             |
| <i>CsDof17</i> | TATA-box    | 1555           | 1561          | core promoter element around -30 of transcription start             |
| <i>CsDof17</i> | TATA-box    | 1556           | 1563          | core promoter element around -30 of transcription start             |
| <i>CsDof17</i> | TATA-box    | 1557           | 1563          | core promoter element around -30 of transcription start             |
| <i>CsDof17</i> | TATA-box    | 1558           | 1564          | core promoter element around -30 of transcription start             |
| <i>CsDof17</i> | TATA-box    | 1559           | 1563          | core promoter element around -30 of transcription start             |
| <i>CsDof17</i> | TATA-box    | 1596           | 1602          | core promoter element around -30 of transcription start             |
| <i>CsDof17</i> | TATA-box    | 1598           | 1602          | core promoter element around -30 of transcription start             |
| <i>CsDof17</i> | TATA-box    | 1613           | 1620          | core promoter element around -30 of transcription start             |
| <i>CsDof17</i> | TATA-box    | 1614           | 1620          | core promoter element around -30 of transcription start             |
| <i>CsDof17</i> | TATA-box    | 1615           | 1620          | core promoter element around -30 of transcription start             |
| <i>CsDof17</i> | TATA-box    | 1616           | 1620          | core promoter element around -30 of transcription start             |
| <i>CsDof17</i> | TATA-box    | 1703           | 1709          | core promoter element around -30 of transcription start             |
| <i>CsDof17</i> | TATA-box    | 1704           | 1709          | core promoter element around -30 of transcription start             |
| <i>CsDof17</i> | TATA-box    | 1705           | 1709          | core promoter element around -30 of transcription start             |
| <i>CsDof17</i> | TATA-box    | 1718           | 1724          | core promoter element around -30 of transcription start             |
| <i>CsDof17</i> | TATA-box    | 1719           | 1723          | core promoter element around -30 of transcription start             |
| <i>CsDof17</i> | TATA-box    | 1845           | 1852          | core promoter element around -30 of transcription start             |
| <i>CsDof17</i> | GARE-motif  | 23             | 30            | gibberellin-responsive element                                      |
| <i>CsDof17</i> | GT1-motif   | 323            | 329           | light responsive element                                            |
| <i>CsDof17</i> | MBS         | 1081           | 1087          | MYB binding site involved in drought-inducibility                   |
| <i>CsDof17</i> | MBS         | 1451           | 1457          | MYB binding site involved in drought-inducibility                   |
| <i>CsDof17</i> | MRE         | 933            | 940           | MYB binding site involved in light responsiveness                   |
| <i>CsDof18</i> | ABRE        | 827            | 832           | abscisic acid responsiveness                                        |
| <i>CsDof18</i> | ABRE        | 1134           | 1141          | abscisic acid responsiveness                                        |
| <i>CsDof18</i> | ABRE        | 1344           | 1349          | abscisic acid responsiveness                                        |
| <i>CsDof18</i> | TGA-element | 519            | 525           | auxin-responsive element                                            |
| <i>CsDof18</i> | TGA-element | 1555           | 1561          | auxin-responsive element                                            |
| <i>CsDof18</i> | ARE         | 1216           | 1222          | cis-acting regulatory element essential for the anaerobic induction |
| <i>CsDof18</i> | ARE         | 1511           | 1517          | cis-acting regulatory element essential for the anaerobic induction |
| <i>CsDof18</i> | G-Box       | 826            | 832           | cis-acting regulatory element involved in light responsiveness      |
| <i>CsDof18</i> | G-Box       | 1343           | 1349          | cis-acting regulatory element involved in light responsiveness      |
| <i>CsDof18</i> | CAT-box     | 476            | 482           | cis-acting regulatory element related to meristem expression        |
| <i>CsDof18</i> | CAAT-box    | 27             | 32            | common cis-acting element in promoter and enhancer regions          |
| <i>CsDof18</i> | CAAT-box    | 50             | 55            | common cis-acting element in promoter and enhancer regions          |
| <i>CsDof18</i> | CAAT-box    | 154            | 159           | common cis-acting element in promoter and enhancer regions          |
| <i>CsDof18</i> | CAAT-box    | 299            | 304           | common cis-acting element in promoter and enhancer regions          |
| <i>CsDof18</i> | CAAT-box    | 302            | 307           | common cis-acting element in promoter and enhancer regions          |

| Name           | Cis-element | Start position | Stop position | Function                                                   |
|----------------|-------------|----------------|---------------|------------------------------------------------------------|
| <i>CsDof18</i> | CAAT-box    | 353            | 358           | common cis-acting element in promoter and enhancer regions |
| <i>CsDof18</i> | CAAT-box    | 422            | 427           | common cis-acting element in promoter and enhancer regions |
| <i>CsDof18</i> | CAAT-box    | 552            | 557           | common cis-acting element in promoter and enhancer regions |
| <i>CsDof18</i> | CAAT-box    | 555            | 560           | common cis-acting element in promoter and enhancer regions |
| <i>CsDof18</i> | CAAT-box    | 660            | 665           | common cis-acting element in promoter and enhancer regions |
| <i>CsDof18</i> | CAAT-box    | 721            | 726           | common cis-acting element in promoter and enhancer regions |
| <i>CsDof18</i> | CAAT-box    | 754            | 759           | common cis-acting element in promoter and enhancer regions |
| <i>CsDof18</i> | CAAT-box    | 776            | 781           | common cis-acting element in promoter and enhancer regions |
| <i>CsDof18</i> | CAAT-box    | 792            | 797           | common cis-acting element in promoter and enhancer regions |
| <i>CsDof18</i> | CAAT-box    | 943            | 948           | common cis-acting element in promoter and enhancer regions |
| <i>CsDof18</i> | CAAT-box    | 1012           | 1017          | common cis-acting element in promoter and enhancer regions |
| <i>CsDof18</i> | CAAT-box    | 1079           | 1084          | common cis-acting element in promoter and enhancer regions |
| <i>CsDof18</i> | CAAT-box    | 1154           | 1159          | common cis-acting element in promoter and enhancer regions |
| <i>CsDof18</i> | CAAT-box    | 1581           | 1586          | common cis-acting element in promoter and enhancer regions |
| <i>CsDof18</i> | CAAT-box    | 1620           | 1625          | common cis-acting element in promoter and enhancer regions |
| <i>CsDof18</i> | CAAT-box    | 1859           | 1869          | common cis-acting element in promoter and enhancer regions |
| <i>CsDof18</i> | CAAT-box    | 1862           | 1867          | common cis-acting element in promoter and enhancer regions |
| <i>CsDof18</i> | TATA-box    | 68             | 73            | core promoter element around -30 of transcription start    |
| <i>CsDof18</i> | TATA-box    | 69             | 73            | core promoter element around -30 of transcription start    |
| <i>CsDof18</i> | TATA-box    | 186            | 191           | core promoter element around -30 of transcription start    |
| <i>CsDof18</i> | TATA-box    | 187            | 191           | core promoter element around -30 of transcription start    |
| <i>CsDof18</i> | TATA-box    | 231            | 235           | core promoter element around -30 of transcription start    |
| <i>CsDof18</i> | TATA-box    | 240            | 246           | core promoter element around -30 of transcription start    |
| <i>CsDof18</i> | TATA-box    | 241            | 247           | core promoter element around -30 of transcription start    |
| <i>CsDof18</i> | TATA-box    | 242            | 248           | core promoter element around -30 of transcription start    |
| <i>CsDof18</i> | TATA-box    | 243            | 247           | core promoter element around -30 of transcription start    |
| <i>CsDof18</i> | TATA-box    | 312            | 318           | core promoter element around -30 of transcription start    |
| <i>CsDof18</i> | TATA-box    | 314            | 318           | core promoter element around -30 of transcription start    |
| <i>CsDof18</i> | TATA-box    | 387            | 394           | core promoter element around -30 of transcription start    |
| <i>CsDof18</i> | TATA-box    | 388            | 394           | core promoter element around -30 of transcription start    |
| <i>CsDof18</i> | TATA-box    | 390            | 394           | core promoter element around -30 of transcription start    |
| <i>CsDof18</i> | TATA-box    | 512            | 519           | core promoter element around -30 of transcription start    |
| <i>CsDof18</i> | TATA-box    | 513            | 519           | core promoter element around -30 of transcription start    |
| <i>CsDof18</i> | TATA-box    | 514            | 519           | core promoter element around -30 of transcription start    |
| <i>CsDof18</i> | TATA-box    | 515            | 519           | core promoter element around -30 of transcription start    |
| <i>CsDof18</i> | TATA-box    | 539            | 543           | core promoter element around -30 of transcription start    |
| <i>CsDof18</i> | TATA-box    | 583            | 594           | core promoter element around -30 of transcription start    |
| <i>CsDof18</i> | TATA-box    | 585            | 589           | core promoter element around -30 of transcription start    |
| <i>CsDof18</i> | TATA-box    | 631            | 635           | core promoter element around -30 of transcription start    |
| <i>CsDof18</i> | TATA-box    | 724            | 730           | core promoter element around -30 of transcription start    |
| <i>CsDof18</i> | TATA-box    | 725            | 730           | core promoter element around -30 of transcription start    |
| <i>CsDof18</i> | TATA-box    | 726            | 730           | core promoter element around -30 of transcription start    |
| <i>CsDof18</i> | TATA-box    | 803            | 810           | core promoter element around -30 of transcription start    |
| <i>CsDof18</i> | TATA-box    | 957            | 961           | core promoter element around -30 of transcription start    |
| <i>CsDof18</i> | TATA-box    | 965            | 969           | core promoter element around -30 of transcription start    |
| <i>CsDof18</i> | TATA-box    | 1044           | 1051          | core promoter element around -30 of transcription start    |
| <i>CsDof18</i> | TATA-box    | 1045           | 1051          | core promoter element around -30 of transcription start    |
| <i>CsDof18</i> | TATA-box    | 1046           | 1052          | core promoter element around -30 of transcription start    |
| <i>CsDof18</i> | TATA-box    | 1047           | 1051          | core promoter element around -30 of transcription start    |
| <i>CsDof18</i> | TATA-box    | 1051           | 1057          | core promoter element around -30 of transcription start    |
| <i>CsDof18</i> | TATA-box    | 1052           | 1059          | core promoter element around -30 of transcription start    |

| Name           | Cis-element     | Start position | Stop position | Function                                                             |
|----------------|-----------------|----------------|---------------|----------------------------------------------------------------------|
| <i>CsDof18</i> | TATA-box        | 1053           | 1059          | core promoter element around -30 of transcription start              |
| <i>CsDof18</i> | TATA-box        | 1054           | 1060          | core promoter element around -30 of transcription start              |
| <i>CsDof18</i> | TATA-box        | 1055           | 1059          | core promoter element around -30 of transcription start              |
| <i>CsDof18</i> | TATA-box        | 1064           | 1070          | core promoter element around -30 of transcription start              |
| <i>CsDof18</i> | TATA-box        | 1065           | 1069          | core promoter element around -30 of transcription start              |
| <i>CsDof18</i> | TATA-box        | 1220           | 1227          | core promoter element around -30 of transcription start              |
| <i>CsDof18</i> | TATA-box        | 1221           | 1227          | core promoter element around -30 of transcription start              |
| <i>CsDof18</i> | TATA-box        | 1222           | 1227          | core promoter element around -30 of transcription start              |
| <i>CsDof18</i> | TATA-box        | 1223           | 1227          | core promoter element around -30 of transcription start              |
| <i>CsDof18</i> | TATA-box        | 1242           | 1247          | core promoter element around -30 of transcription start              |
| <i>CsDof18</i> | TATA-box        | 1243           | 1247          | core promoter element around -30 of transcription start              |
| <i>CsDof18</i> | TATA-box        | 1330           | 1336          | core promoter element around -30 of transcription start              |
| <i>CsDof18</i> | TATA-box        | 1331           | 1337          | core promoter element around -30 of transcription start              |
| <i>CsDof18</i> | TATA-box        | 1332           | 1338          | core promoter element around -30 of transcription start              |
| <i>CsDof18</i> | TATA-box        | 1333           | 1337          | core promoter element around -30 of transcription start              |
| <i>CsDof18</i> | TATA-box        | 1421           | 1428          | core promoter element around -30 of transcription start              |
| <i>CsDof18</i> | TATA-box        | 1422           | 1428          | core promoter element around -30 of transcription start              |
| <i>CsDof18</i> | TATA-box        | 1423           | 1428          | core promoter element around -30 of transcription start              |
| <i>CsDof18</i> | TATA-box        | 1424           | 1428          | core promoter element around -30 of transcription start              |
| <i>CsDof18</i> | TATA-box        | 1452           | 1456          | core promoter element around -30 of transcription start              |
| <i>CsDof18</i> | TATA-box        | 1499           | 1505          | core promoter element around -30 of transcription start              |
| <i>CsDof18</i> | TATA-box        | 1500           | 1505          | core promoter element around -30 of transcription start              |
| <i>CsDof18</i> | TATA-box        | 1501           | 1505          | core promoter element around -30 of transcription start              |
| <i>CsDof18</i> | TATA-box        | 1607           | 1611          | core promoter element around -30 of transcription start              |
| <i>CsDof18</i> | TATA-box        | 1614           | 1618          | core promoter element around -30 of transcription start              |
| <i>CsDof18</i> | TATA-box        | 1645           | 1651          | core promoter element around -30 of transcription start              |
| <i>CsDof18</i> | TATA-box        | 1646           | 1650          | core promoter element around -30 of transcription start              |
| <i>CsDof18</i> | TATA-box        | 1868           | 1877          | core promoter element around -30 of transcription start              |
| <i>CsDof18</i> | P-box           | 607            | 614           | gibberellin-responsive element                                       |
| <i>CsDof18</i> | GT1-motif       | 1015           | 1021          | light responsive element                                             |
| <i>CsDof18</i> | GT1-motif       | 1166           | 1172          | light responsive element                                             |
| <i>CsDof18</i> | GT1-motif       | 1925           | 1932          | light responsive element                                             |
| <i>CsDof18</i> | GT1-motif       | 1926           | 1932          | light responsive element                                             |
| <i>CsDof18</i> | Sp1             | 467            | 473           | light responsive element                                             |
| <i>CsDof18</i> | MBSI            | 501            | 511.5         | MYB binding site involved in flavonoid biosynthetic genes regulation |
| <i>CsDof18</i> | CCAAT-box       | 1517           | 1523          | MYBHv1 binding site                                                  |
| <i>CsDof19</i> | ABRE            | 1897           | 1903          | abscisic acid responsiveness                                         |
| <i>CsDof19</i> | ABRE            | 1898           | 1903          | abscisic acid responsiveness                                         |
| <i>CsDof19</i> | TC-rich repeats | 100            | 109           | cis-acting element involved in defense and stress responsiveness     |
| <i>CsDof19</i> | LTR             | 51             | 57            | cis-acting element involved in low-temperature responsiveness        |
| <i>CsDof19</i> | ARE             | 1090           | 1096          | cis-acting regulatory element essential for the anaerobic induction  |
| <i>CsDof19</i> | G-Box           | 1897           | 1903          | cis-acting regulatory element involved in light responsiveness       |
| <i>CsDof19</i> | G-box           | 1389           | 1395          | cis-acting regulatory element involved in light responsiveness       |
| <i>CsDof19</i> | G-box           | 1896           | 1905          | cis-acting regulatory element involved in light responsiveness       |
| <i>CsDof19</i> | G-box           | 1897           | 1903          | cis-acting regulatory element involved in light responsiveness       |
| <i>CsDof19</i> | RY-element      | 1943           | 1951          | cis-acting regulatory element involved in seed-specific regulation   |
| <i>CsDof19</i> | TGACG-motif     | 898            | 903           | cis-acting regulatory element involved in the MeJA-responsiveness    |
| <i>CsDof19</i> | CGTCA-motif     | 898            | 903           | cis-acting regulatory element involved in the MeJA-responsiveness    |
| <i>CsDof19</i> | O2-site         | 677            | 685           | cis-acting regulatory element involved in zein metabolism regulation |
| <i>CsDof19</i> | CAT-box         | 466            | 472           | cis-acting regulatory element related to meristem expression         |
| <i>CsDof19</i> | CAAT-box        | 161            | 166           | common cis-acting element in promoter and enhancer regions           |



| Name           | Cis-element | Start position | Stop position | Function                                                   |
|----------------|-------------|----------------|---------------|------------------------------------------------------------|
| <i>CsDof19</i> | CAAT-box    | 742            | 747           | common cis-acting element in promoter and enhancer regions |
| <i>CsDof19</i> | CAAT-box    | 1229           | 1234          | common cis-acting element in promoter and enhancer regions |
| <i>CsDof19</i> | CAAT-box    | 1283           | 1288          | common cis-acting element in promoter and enhancer regions |
| <i>CsDof19</i> | CAAT-box    | 1467           | 1472          | common cis-acting element in promoter and enhancer regions |
| <i>CsDof19</i> | CAAT-box    | 1640           | 1645          | common cis-acting element in promoter and enhancer regions |
| <i>CsDof19</i> | CAAT-box    | 1659           | 1664          | common cis-acting element in promoter and enhancer regions |
| <i>CsDof19</i> | CAAT-box    | 1861           | 1866          | common cis-acting element in promoter and enhancer regions |
| <i>CsDof19</i> | TATA-box    | 45             | 51            | core promoter element around -30 of transcription start    |
| <i>CsDof19</i> | TATA-box    | 46             | 50            | core promoter element around -30 of transcription start    |
| <i>CsDof19</i> | TATA-box    | 140            | 146           | core promoter element around -30 of transcription start    |
| <i>CsDof19</i> | TATA-box    | 141            | 146           | core promoter element around -30 of transcription start    |
| <i>CsDof19</i> | TATA-box    | 142            | 146           | core promoter element around -30 of transcription start    |
| <i>CsDof19</i> | TATA-box    | 488            | 495           | core promoter element around -30 of transcription start    |
| <i>CsDof19</i> | TATA-box    | 950            | 954           | core promoter element around -30 of transcription start    |
| <i>CsDof19</i> | TATA-box    | 1015           | 1020          | core promoter element around -30 of transcription start    |
| <i>CsDof19</i> | TATA-box    | 1016           | 1020          | core promoter element around -30 of transcription start    |
| <i>CsDof19</i> | TATA-box    | 1099           | 1105          | core promoter element around -30 of transcription start    |
| <i>CsDof19</i> | TATA-box    | 1101           | 1105          | core promoter element around -30 of transcription start    |
| <i>CsDof19</i> | TATA-box    | 1129           | 1138          | core promoter element around -30 of transcription start    |
| <i>CsDof19</i> | TATA-box    | 1130           | 1137          | core promoter element around -30 of transcription start    |
| <i>CsDof19</i> | TATA-box    | 1131           | 1137          | core promoter element around -30 of transcription start    |
| <i>CsDof19</i> | TATA-box    | 1132           | 1137          | core promoter element around -30 of transcription start    |
| <i>CsDof19</i> | TATA-box    | 1133           | 1137          | core promoter element around -30 of transcription start    |
| <i>CsDof19</i> | TATA-box    | 1279           | 1283          | core promoter element around -30 of transcription start    |
| <i>CsDof19</i> | TATA-box    | 1396           | 1402          | core promoter element around -30 of transcription start    |
| <i>CsDof19</i> | TATA-box    | 1397           | 1401          | core promoter element around -30 of transcription start    |
| <i>CsDof19</i> | TATA-box    | 1479           | 1485          | core promoter element around -30 of transcription start    |
| <i>CsDof19</i> | TATA-box    | 1480           | 1486          | core promoter element around -30 of transcription start    |
| <i>CsDof19</i> | TATA-box    | 1482           | 1486          | core promoter element around -30 of transcription start    |
| <i>CsDof19</i> | TATA-box    | 1496           | 1501          | core promoter element around -30 of transcription start    |
| <i>CsDof19</i> | TATA-box    | 1497           | 1501          | core promoter element around -30 of transcription start    |
| <i>CsDof19</i> | TATA-box    | 1521           | 1527          | core promoter element around -30 of transcription start    |
| <i>CsDof19</i> | TATA-box    | 1522           | 1526          | core promoter element around -30 of transcription start    |
| <i>CsDof19</i> | TATA-box    | 1570           | 1575          | core promoter element around -30 of transcription start    |
| <i>CsDof19</i> | TATA-box    | 1571           | 1575          | core promoter element around -30 of transcription start    |
| <i>CsDof19</i> | TATA-box    | 1574           | 1580          | core promoter element around -30 of transcription start    |
| <i>CsDof19</i> | TATA-box    | 1575           | 1580          | core promoter element around -30 of transcription start    |
| <i>CsDof19</i> | TATA-box    | 1576           | 1580          | core promoter element around -30 of transcription start    |
| <i>CsDof19</i> | TATA-box    | 1601           | 1607          | core promoter element around -30 of transcription start    |
| <i>CsDof19</i> | TATA-box    | 1602           | 1608          | core promoter element around -30 of transcription start    |
| <i>CsDof19</i> | TATA-box    | 1604           | 1608          | core promoter element around -30 of transcription start    |
| <i>CsDof19</i> | TATA-box    | 1773           | 1777          | core promoter element around -30 of transcription start    |
| <i>CsDof19</i> | TATA-box    | 1789           | 1795          | core promoter element around -30 of transcription start    |
| <i>CsDof19</i> | TATA-box    | 1790           | 1796          | core promoter element around -30 of transcription start    |
| <i>CsDof19</i> | TATA-box    | 1791           | 1795          | core promoter element around -30 of transcription start    |
| <i>CsDof19</i> | TATA-box    | 1953           | 1959          | core promoter element around -30 of transcription start    |
| <i>CsDof19</i> | TATA-box    | 1954           | 1960          | core promoter element around -30 of transcription start    |
| <i>CsDof19</i> | TATA-box    | 1955           | 1959          | core promoter element around -30 of transcription start    |
| <i>CsDof19</i> | P-box       | 401            | 408           | gibberellin-responsive element                             |
| <i>CsDof19</i> | GT1-motif   | 1733           | 1740          | light responsive element                                   |
| <i>CsDof19</i> | GT1-motif   | 1734           | 1740          | light responsive element                                   |

| Name           | Cis-element     | Start position | Stop position | Function                                                            |
|----------------|-----------------|----------------|---------------|---------------------------------------------------------------------|
| <i>CsDof19</i> | GT1-motif       | 1812           | 1818          | light responsive element                                            |
| <i>CsDof19</i> | CCAAT-box       | 84             | 90            | MYBHv1 binding site                                                 |
| <i>CsDof20</i> | TGA-element     | 1353           | 1359          | auxin-responsive element                                            |
| <i>CsDof20</i> | TC-rich repeats | 1332           | 1341          | cis-acting element involved in defense and stress responsiveness    |
| <i>CsDof20</i> | ARE             | 801            | 807           | cis-acting regulatory element essential for the anaerobic induction |
| <i>CsDof20</i> | AuxRR-core      | 333            | 340           | cis-acting regulatory element involved in auxin responsiveness      |
| <i>CsDof20</i> | CGTCA-motif     | 1718           | 1723          | cis-acting regulatory element involved in the MeJA-responsiveness   |
| <i>CsDof20</i> | TGACG-motif     | 1718           | 1723          | cis-acting regulatory element involved in the MeJA-responsiveness   |
| <i>CsDof20</i> | CAAT-box        | 64             | 69            | common cis-acting element in promoter and enhancer regions          |
| <i>CsDof20</i> | CAAT-box        | 81             | 86            | common cis-acting element in promoter and enhancer regions          |
| <i>CsDof20</i> | CAAT-box        | 88             | 93            | common cis-acting element in promoter and enhancer regions          |
| <i>CsDof20</i> | CAAT-box        | 206            | 211           | common cis-acting element in promoter and enhancer regions          |
| <i>CsDof20</i> | CAAT-box        | 354            | 359           | common cis-acting element in promoter and enhancer regions          |
| <i>CsDof20</i> | CAAT-box        | 365            | 370           | common cis-acting element in promoter and enhancer regions          |
| <i>CsDof20</i> | CAAT-box        | 375            | 380           | common cis-acting element in promoter and enhancer regions          |
| <i>CsDof20</i> | CAAT-box        | 636            | 641           | common cis-acting element in promoter and enhancer regions          |
| <i>CsDof20</i> | CAAT-box        | 641            | 646           | common cis-acting element in promoter and enhancer regions          |
| <i>CsDof20</i> | CAAT-box        | 690            | 695           | common cis-acting element in promoter and enhancer regions          |
| <i>CsDof20</i> | CAAT-box        | 699            | 704           | common cis-acting element in promoter and enhancer regions          |
| <i>CsDof20</i> | CAAT-box        | 759            | 764           | common cis-acting element in promoter and enhancer regions          |
| <i>CsDof20</i> | CAAT-box        | 1053           | 1058          | common cis-acting element in promoter and enhancer regions          |
| <i>CsDof20</i> | CAAT-box        | 1066           | 1071          | common cis-acting element in promoter and enhancer regions          |
| <i>CsDof20</i> | CAAT-box        | 1087           | 1092          | common cis-acting element in promoter and enhancer regions          |
| <i>CsDof20</i> | CAAT-box        | 1632           | 1637          | common cis-acting element in promoter and enhancer regions          |
| <i>CsDof20</i> | TATA-box        | 153            | 160           | core promoter element around -30 of transcription start             |
| <i>CsDof20</i> | TATA-box        | 154            | 160           | core promoter element around -30 of transcription start             |
| <i>CsDof20</i> | TATA-box        | 155            | 160           | core promoter element around -30 of transcription start             |
| <i>CsDof20</i> | TATA-box        | 156            | 160           | core promoter element around -30 of transcription start             |
| <i>CsDof20</i> | TATA-box        | 214            | 219           | core promoter element around -30 of transcription start             |
| <i>CsDof20</i> | TATA-box        | 215            | 219           | core promoter element around -30 of transcription start             |
| <i>CsDof20</i> | TATA-box        | 262            | 268           | core promoter element around -30 of transcription start             |
| <i>CsDof20</i> | TATA-box        | 263            | 269           | core promoter element around -30 of transcription start             |
| <i>CsDof20</i> | TATA-box        | 264            | 270           | core promoter element around -30 of transcription start             |
| <i>CsDof20</i> | TATA-box        | 265            | 269           | core promoter element around -30 of transcription start             |
| <i>CsDof20</i> | TATA-box        | 269            | 278           | core promoter element around -30 of transcription start             |
| <i>CsDof20</i> | TATA-box        | 500            | 504           | core promoter element around -30 of transcription start             |
| <i>CsDof20</i> | TATA-box        | 506            | 510           | core promoter element around -30 of transcription start             |
| <i>CsDof20</i> | TATA-box        | 535            | 541           | core promoter element around -30 of transcription start             |
| <i>CsDof20</i> | TATA-box        | 536            | 540           | core promoter element around -30 of transcription start             |
| <i>CsDof20</i> | TATA-box        | 571            | 576           | core promoter element around -30 of transcription start             |
| <i>CsDof20</i> | TATA-box        | 572            | 576           | core promoter element around -30 of transcription start             |
| <i>CsDof20</i> | TATA-box        | 654            | 660           | core promoter element around -30 of transcription start             |
| <i>CsDof20</i> | TATA-box        | 655            | 660           | core promoter element around -30 of transcription start             |
| <i>CsDof20</i> | TATA-box        | 656            | 660           | core promoter element around -30 of transcription start             |
| <i>CsDof20</i> | TATA-box        | 710            | 716           | core promoter element around -30 of transcription start             |
| <i>CsDof20</i> | TATA-box        | 711            | 716           | core promoter element around -30 of transcription start             |
| <i>CsDof20</i> | TATA-box        | 712            | 716           | core promoter element around -30 of transcription start             |
| <i>CsDof20</i> | TATA-box        | 880            | 884           | core promoter element around -30 of transcription start             |
| <i>CsDof20</i> | TATA-box        | 910            | 919           | core promoter element around -30 of transcription start             |
| <i>CsDof20</i> | TATA-box        | 911            | 918           | core promoter element around -30 of transcription start             |
| <i>CsDof20</i> | TATA-box        | 912            | 918           | core promoter element around -30 of transcription start             |

| Name           | Cis-element     | Start position | Stop position | Function                                                          |
|----------------|-----------------|----------------|---------------|-------------------------------------------------------------------|
| <i>CsDof20</i> | TATA-box        | 913            | 918           | core promoter element around -30 of transcription start           |
| <i>CsDof20</i> | TATA-box        | 914            | 918           | core promoter element around -30 of transcription start           |
| <i>CsDof20</i> | TATA-box        | 941            | 948           | core promoter element around -30 of transcription start           |
| <i>CsDof20</i> | TATA-box        | 942            | 948           | core promoter element around -30 of transcription start           |
| <i>CsDof20</i> | TATA-box        | 943            | 948           | core promoter element around -30 of transcription start           |
| <i>CsDof20</i> | TATA-box        | 944            | 948           | core promoter element around -30 of transcription start           |
| <i>CsDof20</i> | TATA-box        | 1075           | 1081          | core promoter element around -30 of transcription start           |
| <i>CsDof20</i> | TATA-box        | 1076           | 1081          | core promoter element around -30 of transcription start           |
| <i>CsDof20</i> | TATA-box        | 1077           | 1081          | core promoter element around -30 of transcription start           |
| <i>CsDof20</i> | TATA-box        | 1106           | 1113          | core promoter element around -30 of transcription start           |
| <i>CsDof20</i> | TATA-box        | 1107           | 1113          | core promoter element around -30 of transcription start           |
| <i>CsDof20</i> | TATA-box        | 1108           | 1115          | core promoter element around -30 of transcription start           |
| <i>CsDof20</i> | TATA-box        | 1109           | 1115          | core promoter element around -30 of transcription start           |
| <i>CsDof20</i> | TATA-box        | 1110           | 1116          | core promoter element around -30 of transcription start           |
| <i>CsDof20</i> | TATA-box        | 1111           | 1115          | core promoter element around -30 of transcription start           |
| <i>CsDof20</i> | TATA-box        | 1342           | 1346          | core promoter element around -30 of transcription start           |
| <i>CsDof20</i> | TATA-box        | 1373           | 1379          | core promoter element around -30 of transcription start           |
| <i>CsDof20</i> | TATA-box        | 1374           | 1379          | core promoter element around -30 of transcription start           |
| <i>CsDof20</i> | TATA-box        | 1375           | 1387          | core promoter element around -30 of transcription start           |
| <i>CsDof20</i> | TATA-box        | 1377           | 1385          | core promoter element around -30 of transcription start           |
| <i>CsDof20</i> | TATA-box        | 1408           | 1414          | core promoter element around -30 of transcription start           |
| <i>CsDof20</i> | TATA-box        | 1409           | 1413          | core promoter element around -30 of transcription start           |
| <i>CsDof20</i> | TATA-box        | 1543           | 1549          | core promoter element around -30 of transcription start           |
| <i>CsDof20</i> | TATA-box        | 1545           | 1551          | core promoter element around -30 of transcription start           |
| <i>CsDof20</i> | TATA-box        | 1546           | 1552          | core promoter element around -30 of transcription start           |
| <i>CsDof20</i> | TATA-box        | 1547           | 1553          | core promoter element around -30 of transcription start           |
| <i>CsDof20</i> | TATA-box        | 1548           | 1554          | core promoter element around -30 of transcription start           |
| <i>CsDof20</i> | TATA-box        | 1549           | 1553          | core promoter element around -30 of transcription start           |
| <i>CsDof20</i> | TATA-box        | 1655           | 1659          | core promoter element around -30 of transcription start           |
| <i>CsDof20</i> | TATA-box        | 1661           | 1667          | core promoter element around -30 of transcription start           |
| <i>CsDof20</i> | TATA-box        | 1662           | 1666          | core promoter element around -30 of transcription start           |
| <i>CsDof20</i> | TATA-box        | 1685           | 1691          | core promoter element around -30 of transcription start           |
| <i>CsDof20</i> | TATA-box        | 1686           | 1690          | core promoter element around -30 of transcription start           |
| <i>CsDof20</i> | GT1-motif       | 1788           | 1794          | light responsive element                                          |
| <i>CsDof20</i> | Box III         | 1604           | 1615          | protein binding site                                              |
| <i>CsDof21</i> | ABRE            | 246            | 251           | abscisic acid responsiveness                                      |
| <i>CsDof21</i> | ABRE            | 265            | 270           | abscisic acid responsiveness                                      |
| <i>CsDof21</i> | TGA-element     | 1010           | 1016          | auxin-responsive element                                          |
| <i>CsDof21</i> | TGA-element     | 1356           | 1362          | auxin-responsive element                                          |
| <i>CsDof21</i> | AT-rich element | 1209           | 1219          | binding site of AT-rich DNA binding protein (ATBP-1)              |
| <i>CsDof21</i> | TC-rich repeats | 1622           | 1631          | cis-acting element involved in defense and stress responsiveness  |
| <i>CsDof21</i> | TATC-box        | 478            | 485           | cis-acting element involved in gibberellin-responsiveness         |
| <i>CsDof21</i> | AuxRR-core      | 978            | 985           | cis-acting regulatory element involved in auxin responsiveness    |
| <i>CsDof21</i> | G-box           | 187            | 196           | cis-acting regulatory element involved in light responsiveness    |
| <i>CsDof21</i> | G-box           | 245            | 251           | cis-acting regulatory element involved in light responsiveness    |
| <i>CsDof21</i> | G-box           | 264            | 270           | cis-acting regulatory element involved in light responsiveness    |
| <i>CsDof21</i> | TGACG-motif     | 236            | 241           | cis-acting regulatory element involved in the MeJA-responsiveness |
| <i>CsDof21</i> | TGACG-motif     | 244            | 249           | cis-acting regulatory element involved in the MeJA-responsiveness |
| <i>CsDof21</i> | TGACG-motif     | 897            | 902           | cis-acting regulatory element involved in the MeJA-responsiveness |
| <i>CsDof21</i> | CGTCA-motif     | 236            | 241           | cis-acting regulatory element involved in the MeJA-responsiveness |
| <i>CsDof21</i> | CGTCA-motif     | 244            | 249           | cis-acting regulatory element involved in the MeJA-responsiveness |

| Name           | Cis-element | Start position | Stop position | Function                                                          |
|----------------|-------------|----------------|---------------|-------------------------------------------------------------------|
| <i>CsDof21</i> | CGTCA-motif | 897            | 902           | cis-acting regulatory element involved in the MeJA-responsiveness |
| <i>CsDof21</i> | CAAT-box    | 64             | 71            | common cis-acting element in promoter and enhancer regions        |
| <i>CsDof21</i> | CAAT-box    | 334            | 339           | common cis-acting element in promoter and enhancer regions        |
| <i>CsDof21</i> | CAAT-box    | 655            | 660           | common cis-acting element in promoter and enhancer regions        |
| <i>CsDof21</i> | CAAT-box    | 672            | 677           | common cis-acting element in promoter and enhancer regions        |
| <i>CsDof21</i> | CAAT-box    | 783            | 788           | common cis-acting element in promoter and enhancer regions        |
| <i>CsDof21</i> | CAAT-box    | 1077           | 1082          | common cis-acting element in promoter and enhancer regions        |
| <i>CsDof21</i> | CAAT-box    | 1476           | 1481          | common cis-acting element in promoter and enhancer regions        |
| <i>CsDof21</i> | CAAT-box    | 1486           | 1491          | common cis-acting element in promoter and enhancer regions        |
| <i>CsDof21</i> | TATA-box    | 310            | 314           | core promoter element around -30 of transcription start           |
| <i>CsDof21</i> | TATA-box    | 331            | 335           | core promoter element around -30 of transcription start           |
| <i>CsDof21</i> | TATA-box    | 434            | 440           | core promoter element around -30 of transcription start           |
| <i>CsDof21</i> | TATA-box    | 435            | 440           | core promoter element around -30 of transcription start           |
| <i>CsDof21</i> | TATA-box    | 436            | 440           | core promoter element around -30 of transcription start           |
| <i>CsDof21</i> | TATA-box    | 495            | 502           | core promoter element around -30 of transcription start           |
| <i>CsDof21</i> | TATA-box    | 547            | 551           | core promoter element around -30 of transcription start           |
| <i>CsDof21</i> | TATA-box    | 633            | 640           | core promoter element around -30 of transcription start           |
| <i>CsDof21</i> | TATA-box    | 634            | 640           | core promoter element around -30 of transcription start           |
| <i>CsDof21</i> | TATA-box    | 635            | 640           | core promoter element around -30 of transcription start           |
| <i>CsDof21</i> | TATA-box    | 636            | 640           | core promoter element around -30 of transcription start           |
| <i>CsDof21</i> | TATA-box    | 702            | 706           | core promoter element around -30 of transcription start           |
| <i>CsDof21</i> | TATA-box    | 746            | 752           | core promoter element around -30 of transcription start           |
| <i>CsDof21</i> | TATA-box    | 747            | 751           | core promoter element around -30 of transcription start           |
| <i>CsDof21</i> | TATA-box    | 769            | 773           | core promoter element around -30 of transcription start           |
| <i>CsDof21</i> | TATA-box    | 830            | 837           | core promoter element around -30 of transcription start           |
| <i>CsDof21</i> | TATA-box    | 1096           | 1102          | core promoter element around -30 of transcription start           |
| <i>CsDof21</i> | TATA-box    | 1097           | 1102          | core promoter element around -30 of transcription start           |
| <i>CsDof21</i> | TATA-box    | 1098           | 1102          | core promoter element around -30 of transcription start           |
| <i>CsDof21</i> | TATA-box    | 1116           | 1122          | core promoter element around -30 of transcription start           |
| <i>CsDof21</i> | TATA-box    | 1117           | 1122          | core promoter element around -30 of transcription start           |
| <i>CsDof21</i> | TATA-box    | 1118           | 1122          | core promoter element around -30 of transcription start           |
| <i>CsDof21</i> | TATA-box    | 1184           | 1190          | core promoter element around -30 of transcription start           |
| <i>CsDof21</i> | TATA-box    | 1185           | 1189          | core promoter element around -30 of transcription start           |
| <i>CsDof21</i> | TATA-box    | 1221           | 1227          | core promoter element around -30 of transcription start           |
| <i>CsDof21</i> | TATA-box    | 1222           | 1228          | core promoter element around -30 of transcription start           |
| <i>CsDof21</i> | TATA-box    | 1223           | 1229          | core promoter element around -30 of transcription start           |
| <i>CsDof21</i> | TATA-box    | 1224           | 1230          | core promoter element around -30 of transcription start           |
| <i>CsDof21</i> | TATA-box    | 1225           | 1229          | core promoter element around -30 of transcription start           |
| <i>CsDof21</i> | TATA-box    | 1274           | 1280          | core promoter element around -30 of transcription start           |
| <i>CsDof21</i> | TATA-box    | 1275           | 1279          | core promoter element around -30 of transcription start           |
| <i>CsDof21</i> | TATA-box    | 1461           | 1466          | core promoter element around -30 of transcription start           |
| <i>CsDof21</i> | TATA-box    | 1462           | 1466          | core promoter element around -30 of transcription start           |
| <i>CsDof21</i> | TATA-box    | 1567           | 1571          | core promoter element around -30 of transcription start           |
| <i>CsDof21</i> | TATA-box    | 1572           | 1579          | core promoter element around -30 of transcription start           |
| <i>CsDof21</i> | TATA-box    | 1573           | 1579          | core promoter element around -30 of transcription start           |
| <i>CsDof21</i> | TATA-box    | 1574           | 1580          | core promoter element around -30 of transcription start           |
| <i>CsDof21</i> | TATA-box    | 1575           | 1581          | core promoter element around -30 of transcription start           |
| <i>CsDof21</i> | TATA-box    | 1576           | 1582          | core promoter element around -30 of transcription start           |
| <i>CsDof21</i> | TATA-box    | 1577           | 1581          | core promoter element around -30 of transcription start           |
| <i>CsDof21</i> | TATA-box    | 1685           | 1691          | core promoter element around -30 of transcription start           |
| <i>CsDof21</i> | TATA-box    | 1686           | 1690          | core promoter element around -30 of transcription start           |

| Name           | Cis-element     | Start position | Stop position | Function                                                          |
|----------------|-----------------|----------------|---------------|-------------------------------------------------------------------|
| <i>CsDof21</i> | TATA-box        | 1715           | 1722          | core promoter element around -30 of transcription start           |
| <i>CsDof21</i> | TATA-box        | 1726           | 1732          | core promoter element around -30 of transcription start           |
| <i>CsDof21</i> | TATA-box        | 1728           | 1732          | core promoter element around -30 of transcription start           |
| <i>CsDof21</i> | TATA-box        | 1741           | 1747          | core promoter element around -30 of transcription start           |
| <i>CsDof21</i> | TATA-box        | 1742           | 1748          | core promoter element around -30 of transcription start           |
| <i>CsDof21</i> | TATA-box        | 1743           | 1749          | core promoter element around -30 of transcription start           |
| <i>CsDof21</i> | TATA-box        | 1744           | 1748          | core promoter element around -30 of transcription start           |
| <i>CsDof21</i> | TATA-box        | 1756           | 1765          | core promoter element around -30 of transcription start           |
| <i>CsDof21</i> | TATA-box        | 1757           | 1763          | core promoter element around -30 of transcription start           |
| <i>CsDof21</i> | TATA-box        | 1758           | 1764          | core promoter element around -30 of transcription start           |
| <i>CsDof21</i> | TATA-box        | 1759           | 1765          | core promoter element around -30 of transcription start           |
| <i>CsDof21</i> | TATA-box        | 1760           | 1766          | core promoter element around -30 of transcription start           |
| <i>CsDof21</i> | TATA-box        | 1761           | 1767          | core promoter element around -30 of transcription start           |
| <i>CsDof21</i> | TATA-box        | 1762           | 1766          | core promoter element around -30 of transcription start           |
| <i>CsDof21</i> | GT1-motif       | 1029           | 1035          | light responsive element                                          |
| <i>CsDof21</i> | MBS             | 71             | 77            | MYB binding site involved in drought-inducibility                 |
| <i>CsDof21</i> | HD-Zip 3        | 5              | 14.5          | protein binding site                                              |
| <i>CsDof21</i> | WUN-motif       | 1598           | 1607          | wound-responsive element                                          |
| <i>CsDof22</i> | ABRE            | 123            | 132           | abscisic acid responsiveness                                      |
| <i>CsDof22</i> | TGA-element     | 142            | 148           | auxin-responsive element                                          |
| <i>CsDof22</i> | TGA-element     | 186            | 192           | auxin-responsive element                                          |
| <i>CsDof22</i> | TC-rich repeats | 84             | 93            | cis-acting element involved in defense and stress responsiveness  |
| <i>CsDof22</i> | TC-rich repeats | 358            | 367           | cis-acting element involved in defense and stress responsiveness  |
| <i>CsDof22</i> | TCA-element     | 1490           | 1499          | cis-acting element involved in salicylic acid responsiveness      |
| <i>CsDof22</i> | AuxRR-core      | 1219           | 1226          | cis-acting regulatory element involved in auxin responsiveness    |
| <i>CsDof22</i> | TGACG-motif     | 896            | 901           | cis-acting regulatory element involved in the MeJA-responsiveness |
| <i>CsDof22</i> | TGACG-motif     | 1039           | 1044          | cis-acting regulatory element involved in the MeJA-responsiveness |
| <i>CsDof22</i> | CGTCA-motif     | 896            | 901           | cis-acting regulatory element involved in the MeJA-responsiveness |
| <i>CsDof22</i> | CGTCA-motif     | 1039           | 1044          | cis-acting regulatory element involved in the MeJA-responsiveness |
| <i>CsDof22</i> | CAT-box         | 127            | 133           | cis-acting regulatory element related to meristem expression      |
| <i>CsDof22</i> | CAAT-box        | 134            | 139           | common cis-acting element in promoter and enhancer regions        |
| <i>CsDof22</i> | CAAT-box        | 220            | 225           | common cis-acting element in promoter and enhancer regions        |
| <i>CsDof22</i> | CAAT-box        | 354            | 359           | common cis-acting element in promoter and enhancer regions        |
| <i>CsDof22</i> | CAAT-box        | 507            | 512           | common cis-acting element in promoter and enhancer regions        |
| <i>CsDof22</i> | CAAT-box        | 536            | 541           | common cis-acting element in promoter and enhancer regions        |
| <i>CsDof22</i> | CAAT-box        | 636            | 641           | common cis-acting element in promoter and enhancer regions        |
| <i>CsDof22</i> | CAAT-box        | 952            | 957           | common cis-acting element in promoter and enhancer regions        |
| <i>CsDof22</i> | CAAT-box        | 1000           | 1005          | common cis-acting element in promoter and enhancer regions        |
| <i>CsDof22</i> | CAAT-box        | 1186           | 1191          | common cis-acting element in promoter and enhancer regions        |
| <i>CsDof22</i> | CAAT-box        | 1214           | 1219          | common cis-acting element in promoter and enhancer regions        |
| <i>CsDof22</i> | CAAT-box        | 1236           | 1241          | common cis-acting element in promoter and enhancer regions        |
| <i>CsDof22</i> | CAAT-box        | 1246           | 1251          | common cis-acting element in promoter and enhancer regions        |
| <i>CsDof22</i> | CAAT-box        | 1344           | 1349          | common cis-acting element in promoter and enhancer regions        |
| <i>CsDof22</i> | CAAT-box        | 1598           | 1603          | common cis-acting element in promoter and enhancer regions        |
| <i>CsDof22</i> | CAAT-box        | 1790           | 1795          | common cis-acting element in promoter and enhancer regions        |
| <i>CsDof22</i> | TATA-box        | 565            | 571           | core promoter element around -30 of transcription start           |
| <i>CsDof22</i> | TATA-box        | 566            | 571           | core promoter element around -30 of transcription start           |
| <i>CsDof22</i> | TATA-box        | 567            | 571           | core promoter element around -30 of transcription start           |
| <i>CsDof22</i> | TATA-box        | 623            | 629           | core promoter element around -30 of transcription start           |
| <i>CsDof22</i> | TATA-box        | 624            | 629           | core promoter element around -30 of transcription start           |
| <i>CsDof22</i> | TATA-box        | 625            | 629           | core promoter element around -30 of transcription start           |



| Name           | Cis-element      | Start position | Stop position | Function                                                            |
|----------------|------------------|----------------|---------------|---------------------------------------------------------------------|
| <i>CsDof22</i> | TATA-box         | 1764           | 1768          | core promoter element around -30 of transcription start             |
| <i>CsDof22</i> | AT-rich sequence | 528            | 537           | element for maximal elicitor-mediated activation (2copies)          |
| <i>CsDof22</i> | MRE              | 684            | 691           | MYB binding site involved in light responsiveness                   |
| <i>CsDof22</i> | HD-Zip 3         | 986            | 995.5         | protein binding site                                                |
| <i>CsDof23</i> | TC-rich repeats  | 93             | 102           | cis-acting element involved in defense and stress responsiveness    |
| <i>CsDof23</i> | TCA-element      | 1483           | 1492          | cis-acting element involved in salicylic acid responsiveness        |
| <i>CsDof23</i> | ARE              | 746            | 752           | cis-acting regulatory element essential for the anaerobic induction |
| <i>CsDof23</i> | AuxRR-core       | 1209           | 1216          | cis-acting regulatory element involved in auxin responsiveness      |
| <i>CsDof23</i> | CGTCA-motif      | 358            | 363           | cis-acting regulatory element involved in the MeJA-responsiveness   |
| <i>CsDof23</i> | CGTCA-motif      | 900            | 905           | cis-acting regulatory element involved in the MeJA-responsiveness   |
| <i>CsDof23</i> | CGTCA-motif      | 1028           | 1033          | cis-acting regulatory element involved in the MeJA-responsiveness   |
| <i>CsDof23</i> | TGACG-motif      | 358            | 363           | cis-acting regulatory element involved in the MeJA-responsiveness   |
| <i>CsDof23</i> | TGACG-motif      | 900            | 905           | cis-acting regulatory element involved in the MeJA-responsiveness   |
| <i>CsDof23</i> | TGACG-motif      | 1028           | 1033          | cis-acting regulatory element involved in the MeJA-responsiveness   |
| <i>CsDof23</i> | CAT-box          | 1122           | 1128          | cis-acting regulatory element related to meristem expression        |
| <i>CsDof23</i> | CAAT-box         | 89             | 94            | common cis-acting element in promoter and enhancer regions          |
| <i>CsDof23</i> | CAAT-box         | 247            | 252           | common cis-acting element in promoter and enhancer regions          |
| <i>CsDof23</i> | CAAT-box         | 346            | 351           | common cis-acting element in promoter and enhancer regions          |
| <i>CsDof23</i> | CAAT-box         | 468            | 473           | common cis-acting element in promoter and enhancer regions          |
| <i>CsDof23</i> | CAAT-box         | 540            | 545           | common cis-acting element in promoter and enhancer regions          |
| <i>CsDof23</i> | CAAT-box         | 687            | 692           | common cis-acting element in promoter and enhancer regions          |
| <i>CsDof23</i> | CAAT-box         | 751            | 756           | common cis-acting element in promoter and enhancer regions          |
| <i>CsDof23</i> | CAAT-box         | 956            | 961           | common cis-acting element in promoter and enhancer regions          |
| <i>CsDof23</i> | CAAT-box         | 1004           | 1009          | common cis-acting element in promoter and enhancer regions          |
| <i>CsDof23</i> | CAAT-box         | 1011           | 1016          | common cis-acting element in promoter and enhancer regions          |
| <i>CsDof23</i> | CAAT-box         | 1176           | 1181          | common cis-acting element in promoter and enhancer regions          |
| <i>CsDof23</i> | CAAT-box         | 1204           | 1209          | common cis-acting element in promoter and enhancer regions          |
| <i>CsDof23</i> | CAAT-box         | 1226           | 1231          | common cis-acting element in promoter and enhancer regions          |
| <i>CsDof23</i> | CAAT-box         | 1236           | 1241          | common cis-acting element in promoter and enhancer regions          |
| <i>CsDof23</i> | CAAT-box         | 1335           | 1340          | common cis-acting element in promoter and enhancer regions          |
| <i>CsDof23</i> | CAAT-box         | 1593           | 1598          | common cis-acting element in promoter and enhancer regions          |
| <i>CsDof23</i> | CAAT-box         | 1788           | 1793          | common cis-acting element in promoter and enhancer regions          |
| <i>CsDof23</i> | TATA-box         | 222            | 230           | core promoter element around -30 of transcription start             |
| <i>CsDof23</i> | TATA-box         | 294            | 300           | core promoter element around -30 of transcription start             |
| <i>CsDof23</i> | TATA-box         | 296            | 300           | core promoter element around -30 of transcription start             |
| <i>CsDof23</i> | TATA-box         | 334            | 340           | core promoter element around -30 of transcription start             |
| <i>CsDof23</i> | TATA-box         | 335            | 339           | core promoter element around -30 of transcription start             |
| <i>CsDof23</i> | TATA-box         | 376            | 380           | core promoter element around -30 of transcription start             |
| <i>CsDof23</i> | TATA-box         | 398            | 407           | core promoter element around -30 of transcription start             |
| <i>CsDof23</i> | TATA-box         | 399            | 408           | core promoter element around -30 of transcription start             |
| <i>CsDof23</i> | TATA-box         | 400            | 406           | core promoter element around -30 of transcription start             |
| <i>CsDof23</i> | TATA-box         | 401            | 408           | core promoter element around -30 of transcription start             |
| <i>CsDof23</i> | TATA-box         | 402            | 408           | core promoter element around -30 of transcription start             |
| <i>CsDof23</i> | TATA-box         | 403            | 409           | core promoter element around -30 of transcription start             |
| <i>CsDof23</i> | TATA-box         | 404            | 408           | core promoter element around -30 of transcription start             |
| <i>CsDof23</i> | TATA-box         | 492            | 496           | core promoter element around -30 of transcription start             |
| <i>CsDof23</i> | TATA-box         | 591            | 600           | core promoter element around -30 of transcription start             |
| <i>CsDof23</i> | TATA-box         | 592            | 599           | core promoter element around -30 of transcription start             |
| <i>CsDof23</i> | TATA-box         | 593            | 599           | core promoter element around -30 of transcription start             |
| <i>CsDof23</i> | TATA-box         | 594            | 599           | core promoter element around -30 of transcription start             |
| <i>CsDof23</i> | TATA-box         | 595            | 599           | core promoter element around -30 of transcription start             |

| <b>Name</b>    | <b>Cis-element</b> | <b>Start position</b> | <b>Stop position</b> | <b>Function</b>                                            |
|----------------|--------------------|-----------------------|----------------------|------------------------------------------------------------|
| <i>CsDof23</i> | TATA-box           | 631                   | 642                  | core promoter element around -30 of transcription start    |
| <i>CsDof23</i> | TATA-box           | 633                   | 637                  | core promoter element around -30 of transcription start    |
| <i>CsDof23</i> | TATA-box           | 708                   | 714                  | core promoter element around -30 of transcription start    |
| <i>CsDof23</i> | TATA-box           | 709                   | 714                  | core promoter element around -30 of transcription start    |
| <i>CsDof23</i> | TATA-box           | 710                   | 714                  | core promoter element around -30 of transcription start    |
| <i>CsDof23</i> | TATA-box           | 724                   | 730                  | core promoter element around -30 of transcription start    |
| <i>CsDof23</i> | TATA-box           | 725                   | 730                  | core promoter element around -30 of transcription start    |
| <i>CsDof23</i> | TATA-box           | 726                   | 730                  | core promoter element around -30 of transcription start    |
| <i>CsDof23</i> | TATA-box           | 764                   | 769                  | core promoter element around -30 of transcription start    |
| <i>CsDof23</i> | TATA-box           | 765                   | 769                  | core promoter element around -30 of transcription start    |
| <i>CsDof23</i> | TATA-box           | 799                   | 805                  | core promoter element around -30 of transcription start    |
| <i>CsDof23</i> | TATA-box           | 800                   | 805                  | core promoter element around -30 of transcription start    |
| <i>CsDof23</i> | TATA-box           | 801                   | 805                  | core promoter element around -30 of transcription start    |
| <i>CsDof23</i> | TATA-box           | 813                   | 819                  | core promoter element around -30 of transcription start    |
| <i>CsDof23</i> | TATA-box           | 815                   | 819                  | core promoter element around -30 of transcription start    |
| <i>CsDof23</i> | TATA-box           | 826                   | 832                  | core promoter element around -30 of transcription start    |
| <i>CsDof23</i> | TATA-box           | 827                   | 832                  | core promoter element around -30 of transcription start    |
| <i>CsDof23</i> | TATA-box           | 828                   | 832                  | core promoter element around -30 of transcription start    |
| <i>CsDof23</i> | TATA-box           | 837                   | 842                  | core promoter element around -30 of transcription start    |
| <i>CsDof23</i> | TATA-box           | 838                   | 842                  | core promoter element around -30 of transcription start    |
| <i>CsDof23</i> | TATA-box           | 1070                  | 1076                 | core promoter element around -30 of transcription start    |
| <i>CsDof23</i> | TATA-box           | 1072                  | 1076                 | core promoter element around -30 of transcription start    |
| <i>CsDof23</i> | TATA-box           | 1080                  | 1084                 | core promoter element around -30 of transcription start    |
| <i>CsDof23</i> | TATA-box           | 1154                  | 1160                 | core promoter element around -30 of transcription start    |
| <i>CsDof23</i> | TATA-box           | 1156                  | 1162                 | core promoter element around -30 of transcription start    |
| <i>CsDof23</i> | TATA-box           | 1158                  | 1162                 | core promoter element around -30 of transcription start    |
| <i>CsDof23</i> | TATA-box           | 1164                  | 1168                 | core promoter element around -30 of transcription start    |
| <i>CsDof23</i> | TATA-box           | 1320                  | 1327                 | core promoter element around -30 of transcription start    |
| <i>CsDof23</i> | TATA-box           | 1321                  | 1327                 | core promoter element around -30 of transcription start    |
| <i>CsDof23</i> | TATA-box           | 1322                  | 1327                 | core promoter element around -30 of transcription start    |
| <i>CsDof23</i> | TATA-box           | 1323                  | 1327                 | core promoter element around -30 of transcription start    |
| <i>CsDof23</i> | TATA-box           | 1338                  | 1344                 | core promoter element around -30 of transcription start    |
| <i>CsDof23</i> | TATA-box           | 1339                  | 1343                 | core promoter element around -30 of transcription start    |
| <i>CsDof23</i> | TATA-box           | 1397                  | 1403                 | core promoter element around -30 of transcription start    |
| <i>CsDof23</i> | TATA-box           | 1398                  | 1404                 | core promoter element around -30 of transcription start    |
| <i>CsDof23</i> | TATA-box           | 1399                  | 1405                 | core promoter element around -30 of transcription start    |
| <i>CsDof23</i> | TATA-box           | 1400                  | 1406                 | core promoter element around -30 of transcription start    |
| <i>CsDof23</i> | TATA-box           | 1401                  | 1405                 | core promoter element around -30 of transcription start    |
| <i>CsDof23</i> | TATA-box           | 1516                  | 1523                 | core promoter element around -30 of transcription start    |
| <i>CsDof23</i> | TATA-box           | 1517                  | 1523                 | core promoter element around -30 of transcription start    |
| <i>CsDof23</i> | TATA-box           | 1518                  | 1523                 | core promoter element around -30 of transcription start    |
| <i>CsDof23</i> | TATA-box           | 1519                  | 1523                 | core promoter element around -30 of transcription start    |
| <i>CsDof23</i> | TATA-box           | 1612                  | 1616                 | core promoter element around -30 of transcription start    |
| <i>CsDof23</i> | TATA-box           | 1687                  | 1695                 | core promoter element around -30 of transcription start    |
| <i>CsDof23</i> | TATA-box           | 1696                  | 1700                 | core promoter element around -30 of transcription start    |
| <i>CsDof23</i> | TATA-box           | 1749                  | 1755                 | core promoter element around -30 of transcription start    |
| <i>CsDof23</i> | TATA-box           | 1750                  | 1754                 | core promoter element around -30 of transcription start    |
| <i>CsDof23</i> | TATA-box           | 1754                  | 1760                 | core promoter element around -30 of transcription start    |
| <i>CsDof23</i> | TATA-box           | 1756                  | 1760                 | core promoter element around -30 of transcription start    |
| <i>CsDof23</i> | TATA-box           | 1762                  | 1766                 | core promoter element around -30 of transcription start    |
| <i>CsDof23</i> | AT-rich sequence   | 239                   | 248                  | element for maximal elicitor-mediated activation (2copies) |



| Name           | Cis-element        | Start position | Stop position | Function                                                             |
|----------------|--------------------|----------------|---------------|----------------------------------------------------------------------|
| <i>CsDof23</i> | 3-AF1 binding site | 717            | 727           | light responsive element                                             |
| <i>CsDof23</i> | MBSI               | 1521           | 1531.5        | MYB binding site involved in flavonoid biosynthetic genes regulation |
| <i>CsDof23</i> | MRE                | 383            | 390           | MYB binding site involved in light responsiveness                    |
| <i>CsDof23</i> | HD-Zip 3           | 990            | 999.5         | protein binding site                                                 |
| <i>CsDof24</i> | TGA-element        | 305            | 311           | auxin-responsive element                                             |
| <i>CsDof24</i> | TGA-element        | 1014           | 1020          | auxin-responsive element                                             |
| <i>CsDof24</i> | TGA-element        | 1362           | 1368          | auxin-responsive element                                             |
| <i>CsDof24</i> | AT-rich element    | 160            | 170           | binding site of AT-rich DNA binding protein (ATBP-1)                 |
| <i>CsDof24</i> | AT-rich element    | 1217           | 1227          | binding site of AT-rich DNA binding protein (ATBP-1)                 |
| <i>CsDof24</i> | TC-rich repeats    | 1626           | 1635          | cis-acting element involved in defense and stress responsiveness     |
| <i>CsDof24</i> | ARE                | 1935           | 1941          | cis-acting regulatory element essential for the anaerobic induction  |
| <i>CsDof24</i> | AuxRR-core         | 982            | 989           | cis-acting regulatory element involved in auxin responsiveness       |
| <i>CsDof24</i> | CAAT-box           | 25             | 30            | common cis-acting element in promoter and enhancer regions           |
| <i>CsDof24</i> | CAAT-box           | 292            | 297           | common cis-acting element in promoter and enhancer regions           |
| <i>CsDof24</i> | CAAT-box           | 301            | 306           | common cis-acting element in promoter and enhancer regions           |
| <i>CsDof24</i> | CAAT-box           | 421            | 426           | common cis-acting element in promoter and enhancer regions           |
| <i>CsDof24</i> | CAAT-box           | 1082           | 1087          | common cis-acting element in promoter and enhancer regions           |
| <i>CsDof24</i> | CAAT-box           | 1349           | 1354          | common cis-acting element in promoter and enhancer regions           |
| <i>CsDof24</i> | CAAT-box           | 1358           | 1363          | common cis-acting element in promoter and enhancer regions           |
| <i>CsDof24</i> | CAAT-box           | 1478           | 1483          | common cis-acting element in promoter and enhancer regions           |
| <i>CsDof24</i> | TATA-box           | 36             | 41            | core promoter element around -30 of transcription start              |
| <i>CsDof24</i> | TATA-box           | 37             | 41            | core promoter element around -30 of transcription start              |
| <i>CsDof24</i> | TATA-box           | 45             | 51            | core promoter element around -30 of transcription start              |
| <i>CsDof24</i> | TATA-box           | 46             | 51            | core promoter element around -30 of transcription start              |
| <i>CsDof24</i> | TATA-box           | 47             | 51            | core promoter element around -30 of transcription start              |
| <i>CsDof24</i> | TATA-box           | 135            | 141           | core promoter element around -30 of transcription start              |
| <i>CsDof24</i> | TATA-box           | 136            | 140           | core promoter element around -30 of transcription start              |
| <i>CsDof24</i> | TATA-box           | 172            | 178           | core promoter element around -30 of transcription start              |
| <i>CsDof24</i> | TATA-box           | 173            | 179           | core promoter element around -30 of transcription start              |
| <i>CsDof24</i> | TATA-box           | 174            | 180           | core promoter element around -30 of transcription start              |
| <i>CsDof24</i> | TATA-box           | 175            | 181           | core promoter element around -30 of transcription start              |
| <i>CsDof24</i> | TATA-box           | 176            | 180           | core promoter element around -30 of transcription start              |
| <i>CsDof24</i> | TATA-box           | 225            | 231           | core promoter element around -30 of transcription start              |
| <i>CsDof24</i> | TATA-box           | 226            | 230           | core promoter element around -30 of transcription start              |
| <i>CsDof24</i> | TATA-box           | 388            | 398           | core promoter element around -30 of transcription start              |
| <i>CsDof24</i> | TATA-box           | 389            | 396           | core promoter element around -30 of transcription start              |
| <i>CsDof24</i> | TATA-box           | 390            | 396           | core promoter element around -30 of transcription start              |
| <i>CsDof24</i> | TATA-box           | 391            | 398           | core promoter element around -30 of transcription start              |
| <i>CsDof24</i> | TATA-box           | 392            | 398           | core promoter element around -30 of transcription start              |
| <i>CsDof24</i> | TATA-box           | 393            | 399           | core promoter element around -30 of transcription start              |
| <i>CsDof24</i> | TATA-box           | 394            | 398           | core promoter element around -30 of transcription start              |
| <i>CsDof24</i> | TATA-box           | 403            | 408           | core promoter element around -30 of transcription start              |
| <i>CsDof24</i> | TATA-box           | 404            | 408           | core promoter element around -30 of transcription start              |
| <i>CsDof24</i> | TATA-box           | 427            | 436           | core promoter element around -30 of transcription start              |
| <i>CsDof24</i> | TATA-box           | 429            | 433           | core promoter element around -30 of transcription start              |
| <i>CsDof24</i> | TATA-box           | 454            | 460           | core promoter element around -30 of transcription start              |
| <i>CsDof24</i> | TATA-box           | 455            | 459           | core promoter element around -30 of transcription start              |
| <i>CsDof24</i> | TATA-box           | 512            | 516           | core promoter element around -30 of transcription start              |
| <i>CsDof24</i> | TATA-box           | 517            | 524           | core promoter element around -30 of transcription start              |
| <i>CsDof24</i> | TATA-box           | 518            | 524           | core promoter element around -30 of transcription start              |
| <i>CsDof24</i> | TATA-box           | 519            | 525           | core promoter element around -30 of transcription start              |



| Name           | Cis-element     | Start position | Stop position | Function                                                            |
|----------------|-----------------|----------------|---------------|---------------------------------------------------------------------|
| <i>CsDof24</i> | TATA-box        | 1761           | 1767          | core promoter element around -30 of transcription start             |
| <i>CsDof24</i> | TATA-box        | 1762           | 1768          | core promoter element around -30 of transcription start             |
| <i>CsDof24</i> | TATA-box        | 1763           | 1769          | core promoter element around -30 of transcription start             |
| <i>CsDof24</i> | TATA-box        | 1764           | 1770          | core promoter element around -30 of transcription start             |
| <i>CsDof24</i> | TATA-box        | 1765           | 1771          | core promoter element around -30 of transcription start             |
| <i>CsDof24</i> | TATA-box        | 1766           | 1772          | core promoter element around -30 of transcription start             |
| <i>CsDof24</i> | TATA-box        | 1767           | 1773          | core promoter element around -30 of transcription start             |
| <i>CsDof24</i> | TATA-box        | 1768           | 1772          | core promoter element around -30 of transcription start             |
| <i>CsDof24</i> | GT1-motif       | 1033           | 1039          | light responsive element                                            |
| <i>CsDof24</i> | WUN-motif       | 1602           | 1611          | wound-responsive element                                            |
| <i>CsDof25</i> | TGA-element     | 542            | 548           | auxin-responsive element                                            |
| <i>CsDof25</i> | TC-rich repeats | 1344           | 1353          | cis-acting element involved in defense and stress responsiveness    |
| <i>CsDof25</i> | TC-rich repeats | 1794           | 1803          | cis-acting element involved in defense and stress responsiveness    |
| <i>CsDof25</i> | ACE             | 1349           | 1358          | cis-acting element involved in light responsiveness                 |
| <i>CsDof25</i> | TCA-element     | 1242           | 1251          | cis-acting element involved in salicylic acid responsiveness        |
| <i>CsDof25</i> | ARE             | 364            | 370           | cis-acting regulatory element essential for the anaerobic induction |
| <i>CsDof25</i> | ARE             | 1325           | 1331          | cis-acting regulatory element essential for the anaerobic induction |
| <i>CsDof25</i> | circadian       | 584            | 593           | cis-acting regulatory element involved in circadian control         |
| <i>CsDof25</i> | CGTCA-motif     | 38             | 43            | cis-acting regulatory element involved in the MeJA-responsiveness   |
| <i>CsDof25</i> | TGACG-motif     | 38             | 43            | cis-acting regulatory element involved in the MeJA-responsiveness   |
| <i>CsDof25</i> | CAAT-box        | 136            | 141           | common cis-acting element in promoter and enhancer regions          |
| <i>CsDof25</i> | CAAT-box        | 144            | 149           | common cis-acting element in promoter and enhancer regions          |
| <i>CsDof25</i> | CAAT-box        | 168            | 173           | common cis-acting element in promoter and enhancer regions          |
| <i>CsDof25</i> | CAAT-box        | 221            | 226           | common cis-acting element in promoter and enhancer regions          |
| <i>CsDof25</i> | CAAT-box        | 237            | 242           | common cis-acting element in promoter and enhancer regions          |
| <i>CsDof25</i> | CAAT-box        | 308            | 313           | common cis-acting element in promoter and enhancer regions          |
| <i>CsDof25</i> | CAAT-box        | 341            | 346           | common cis-acting element in promoter and enhancer regions          |
| <i>CsDof25</i> | CAAT-box        | 394            | 399           | common cis-acting element in promoter and enhancer regions          |
| <i>CsDof25</i> | CAAT-box        | 739            | 744           | common cis-acting element in promoter and enhancer regions          |
| <i>CsDof25</i> | CAAT-box        | 854            | 859           | common cis-acting element in promoter and enhancer regions          |
| <i>CsDof25</i> | CAAT-box        | 874            | 879           | common cis-acting element in promoter and enhancer regions          |
| <i>CsDof25</i> | CAAT-box        | 1057           | 1062          | common cis-acting element in promoter and enhancer regions          |
| <i>CsDof25</i> | CAAT-box        | 1156           | 1161          | common cis-acting element in promoter and enhancer regions          |
| <i>CsDof25</i> | CAAT-box        | 1251           | 1256          | common cis-acting element in promoter and enhancer regions          |
| <i>CsDof25</i> | CAAT-box        | 1424           | 1429          | common cis-acting element in promoter and enhancer regions          |
| <i>CsDof25</i> | CAAT-box        | 1529           | 1534          | common cis-acting element in promoter and enhancer regions          |
| <i>CsDof25</i> | CAAT-box        | 1687           | 1692          | common cis-acting element in promoter and enhancer regions          |
| <i>CsDof25</i> | TATA-box        | 204            | 213           | core promoter element around -30 of transcription start             |
| <i>CsDof25</i> | TATA-box        | 205            | 211           | core promoter element around -30 of transcription start             |
| <i>CsDof25</i> | TATA-box        | 206            | 212           | core promoter element around -30 of transcription start             |
| <i>CsDof25</i> | TATA-box        | 207            | 213           | core promoter element around -30 of transcription start             |
| <i>CsDof25</i> | TATA-box        | 208            | 214           | core promoter element around -30 of transcription start             |
| <i>CsDof25</i> | TATA-box        | 209            | 215           | core promoter element around -30 of transcription start             |
| <i>CsDof25</i> | TATA-box        | 210            | 216           | core promoter element around -30 of transcription start             |
| <i>CsDof25</i> | TATA-box        | 211            | 217           | core promoter element around -30 of transcription start             |
| <i>CsDof25</i> | TATA-box        | 212            | 224           | core promoter element around -30 of transcription start             |
| <i>CsDof25</i> | TATA-box        | 213            | 219           | core promoter element around -30 of transcription start             |
| <i>CsDof25</i> | TATA-box        | 214            | 220           | core promoter element around -30 of transcription start             |
| <i>CsDof25</i> | TATA-box        | 215            | 221           | core promoter element around -30 of transcription start             |
| <i>CsDof25</i> | TATA-box        | 216            | 222           | core promoter element around -30 of transcription start             |
| <i>CsDof25</i> | TATA-box        | 217            | 223           | core promoter element around -30 of transcription start             |



| Name           | Cis-element     | Start position | Stop position | Function                                                            |
|----------------|-----------------|----------------|---------------|---------------------------------------------------------------------|
| <i>CsDof25</i> | TATA-box        | 1532           | 1538          | core promoter element around -30 of transcription start             |
| <i>CsDof25</i> | TATA-box        | 1533           | 1539          | core promoter element around -30 of transcription start             |
| <i>CsDof25</i> | TATA-box        | 1534           | 1540          | core promoter element around -30 of transcription start             |
| <i>CsDof25</i> | TATA-box        | 1535           | 1539          | core promoter element around -30 of transcription start             |
| <i>CsDof25</i> | TATA-box        | 1540           | 1548          | core promoter element around -30 of transcription start             |
| <i>CsDof25</i> | TATA-box        | 1541           | 1548          | core promoter element around -30 of transcription start             |
| <i>CsDof25</i> | TATA-box        | 1542           | 1548          | core promoter element around -30 of transcription start             |
| <i>CsDof25</i> | TATA-box        | 1543           | 1548          | core promoter element around -30 of transcription start             |
| <i>CsDof25</i> | TATA-box        | 1544           | 1548          | core promoter element around -30 of transcription start             |
| <i>CsDof25</i> | TATA-box        | 1549           | 1553          | core promoter element around -30 of transcription start             |
| <i>CsDof25</i> | TATA-box        | 1554           | 1560          | core promoter element around -30 of transcription start             |
| <i>CsDof25</i> | TATA-box        | 1555           | 1559          | core promoter element around -30 of transcription start             |
| <i>CsDof25</i> | TATA-box        | 1576           | 1581          | core promoter element around -30 of transcription start             |
| <i>CsDof25</i> | TATA-box        | 1577           | 1581          | core promoter element around -30 of transcription start             |
| <i>CsDof25</i> | TATA-box        | 1638           | 1644          | core promoter element around -30 of transcription start             |
| <i>CsDof25</i> | TATA-box        | 1639           | 1645          | core promoter element around -30 of transcription start             |
| <i>CsDof25</i> | TATA-box        | 1640           | 1646          | core promoter element around -30 of transcription start             |
| <i>CsDof25</i> | TATA-box        | 1641           | 1647          | core promoter element around -30 of transcription start             |
| <i>CsDof25</i> | TATA-box        | 1643           | 1647          | core promoter element around -30 of transcription start             |
| <i>CsDof25</i> | TATA-box        | 1648           | 1654          | core promoter element around -30 of transcription start             |
| <i>CsDof25</i> | TATA-box        | 1649           | 1655          | core promoter element around -30 of transcription start             |
| <i>CsDof25</i> | TATA-box        | 1651           | 1655          | core promoter element around -30 of transcription start             |
| <i>CsDof25</i> | TATA-box        | 1662           | 1668          | core promoter element around -30 of transcription start             |
| <i>CsDof25</i> | TATA-box        | 1663           | 1669          | core promoter element around -30 of transcription start             |
| <i>CsDof25</i> | TATA-box        | 1664           | 1670          | core promoter element around -30 of transcription start             |
| <i>CsDof25</i> | TATA-box        | 1665           | 1671          | core promoter element around -30 of transcription start             |
| <i>CsDof25</i> | TATA-box        | 1666           | 1672          | core promoter element around -30 of transcription start             |
| <i>CsDof25</i> | TATA-box        | 1667           | 1673          | core promoter element around -30 of transcription start             |
| <i>CsDof25</i> | TATA-box        | 1668           | 1674          | core promoter element around -30 of transcription start             |
| <i>CsDof25</i> | TATA-box        | 1669           | 1675          | core promoter element around -30 of transcription start             |
| <i>CsDof25</i> | TATA-box        | 1670           | 1676          | core promoter element around -30 of transcription start             |
| <i>CsDof25</i> | TATA-box        | 1671           | 1677          | core promoter element around -30 of transcription start             |
| <i>CsDof25</i> | TATA-box        | 1673           | 1677          | core promoter element around -30 of transcription start             |
| <i>CsDof25</i> | TATA-box        | 1683           | 1687          | core promoter element around -30 of transcription start             |
| <i>CsDof25</i> | TATA-box        | 1714           | 1720          | core promoter element around -30 of transcription start             |
| <i>CsDof25</i> | TATA-box        | 1715           | 1721          | core promoter element around -30 of transcription start             |
| <i>CsDof25</i> | TATA-box        | 1716           | 1722          | core promoter element around -30 of transcription start             |
| <i>CsDof25</i> | TATA-box        | 1717           | 1723          | core promoter element around -30 of transcription start             |
| <i>CsDof25</i> | TATA-box        | 1718           | 1724          | core promoter element around -30 of transcription start             |
| <i>CsDof25</i> | TATA-box        | 1719           | 1723          | core promoter element around -30 of transcription start             |
| <i>CsDof25</i> | P-box           | 1841           | 1848          | gibberellin-responsive element                                      |
| <i>CsDof25</i> | GT1-motif       | 780            | 787           | light responsive element                                            |
| <i>CsDof25</i> | GT1-motif       | 781            | 787           | light responsive element                                            |
| <i>CsDof25</i> | MBS             | 73             | 79            | MYB binding site involved in drought-inducibility                   |
| <i>CsDof26</i> | ABRE            | 147            | 154           | abscisic acid responsiveness                                        |
| <i>CsDof26</i> | ABRE            | 164            | 173           | abscisic acid responsiveness                                        |
| <i>CsDof26</i> | TC-rich repeats | 121            | 130           | cis-acting element involved in defense and stress responsiveness    |
| <i>CsDof26</i> | ARE             | 346            | 352           | cis-acting regulatory element essential for the anaerobic induction |
| <i>CsDof26</i> | circadian       | 1919           | 1928          | cis-acting regulatory element involved in circadian control         |
| <i>CsDof26</i> | CAAT-box        | 237            | 242           | common cis-acting element in promoter and enhancer regions          |
| <i>CsDof26</i> | CAAT-box        | 392            | 397           | common cis-acting element in promoter and enhancer regions          |

| Name           | Cis-element | Start position | Stop position | Function                                                   |
|----------------|-------------|----------------|---------------|------------------------------------------------------------|
| <i>CsDof26</i> | CAAT-box    | 444            | 449           | common cis-acting element in promoter and enhancer regions |
| <i>CsDof26</i> | CAAT-box    | 612            | 617           | common cis-acting element in promoter and enhancer regions |
| <i>CsDof26</i> | CAAT-box    | 633            | 643           | common cis-acting element in promoter and enhancer regions |
| <i>CsDof26</i> | CAAT-box    | 659            | 664           | common cis-acting element in promoter and enhancer regions |
| <i>CsDof26</i> | CAAT-box    | 871            | 876           | common cis-acting element in promoter and enhancer regions |
| <i>CsDof26</i> | CAAT-box    | 930            | 935           | common cis-acting element in promoter and enhancer regions |
| <i>CsDof26</i> | CAAT-box    | 1065           | 1070          | common cis-acting element in promoter and enhancer regions |
| <i>CsDof26</i> | CAAT-box    | 1087           | 1092          | common cis-acting element in promoter and enhancer regions |
| <i>CsDof26</i> | CAAT-box    | 1407           | 1412          | common cis-acting element in promoter and enhancer regions |
| <i>CsDof26</i> | CAAT-box    | 1566           | 1571          | common cis-acting element in promoter and enhancer regions |
| <i>CsDof26</i> | CAAT-box    | 1746           | 1751          | common cis-acting element in promoter and enhancer regions |
| <i>CsDof26</i> | TATA-box    | 18             | 27            | core promoter element around -30 of transcription start    |
| <i>CsDof26</i> | TATA-box    | 20             | 24            | core promoter element around -30 of transcription start    |
| <i>CsDof26</i> | TATA-box    | 48             | 52            | core promoter element around -30 of transcription start    |
| <i>CsDof26</i> | TATA-box    | 68             | 74            | core promoter element around -30 of transcription start    |
| <i>CsDof26</i> | TATA-box    | 69             | 73            | core promoter element around -30 of transcription start    |
| <i>CsDof26</i> | TATA-box    | 152            | 156           | core promoter element around -30 of transcription start    |
| <i>CsDof26</i> | TATA-box    | 198            | 204           | core promoter element around -30 of transcription start    |
| <i>CsDof26</i> | TATA-box    | 199            | 203           | core promoter element around -30 of transcription start    |
| <i>CsDof26</i> | TATA-box    | 212            | 216           | core promoter element around -30 of transcription start    |
| <i>CsDof26</i> | TATA-box    | 230            | 236           | core promoter element around -30 of transcription start    |
| <i>CsDof26</i> | TATA-box    | 231            | 237           | core promoter element around -30 of transcription start    |
| <i>CsDof26</i> | TATA-box    | 233            | 237           | core promoter element around -30 of transcription start    |
| <i>CsDof26</i> | TATA-box    | 240            | 246           | core promoter element around -30 of transcription start    |
| <i>CsDof26</i> | TATA-box    | 241            | 245           | core promoter element around -30 of transcription start    |
| <i>CsDof26</i> | TATA-box    | 268            | 274           | core promoter element around -30 of transcription start    |
| <i>CsDof26</i> | TATA-box    | 269            | 275           | core promoter element around -30 of transcription start    |
| <i>CsDof26</i> | TATA-box    | 270            | 276           | core promoter element around -30 of transcription start    |
| <i>CsDof26</i> | TATA-box    | 271            | 275           | core promoter element around -30 of transcription start    |
| <i>CsDof26</i> | TATA-box    | 357            | 364           | core promoter element around -30 of transcription start    |
| <i>CsDof26</i> | TATA-box    | 400            | 406           | core promoter element around -30 of transcription start    |
| <i>CsDof26</i> | TATA-box    | 401            | 406           | core promoter element around -30 of transcription start    |
| <i>CsDof26</i> | TATA-box    | 402            | 406           | core promoter element around -30 of transcription start    |
| <i>CsDof26</i> | TATA-box    | 528            | 537           | core promoter element around -30 of transcription start    |
| <i>CsDof26</i> | TATA-box    | 529            | 536           | core promoter element around -30 of transcription start    |
| <i>CsDof26</i> | TATA-box    | 530            | 536           | core promoter element around -30 of transcription start    |
| <i>CsDof26</i> | TATA-box    | 531            | 538           | core promoter element around -30 of transcription start    |
| <i>CsDof26</i> | TATA-box    | 532            | 538           | core promoter element around -30 of transcription start    |
| <i>CsDof26</i> | TATA-box    | 534            | 538           | core promoter element around -30 of transcription start    |
| <i>CsDof26</i> | TATA-box    | 541            | 547           | core promoter element around -30 of transcription start    |
| <i>CsDof26</i> | TATA-box    | 543            | 547           | core promoter element around -30 of transcription start    |
| <i>CsDof26</i> | TATA-box    | 559            | 563           | core promoter element around -30 of transcription start    |
| <i>CsDof26</i> | TATA-box    | 572            | 578           | core promoter element around -30 of transcription start    |
| <i>CsDof26</i> | TATA-box    | 574            | 578           | core promoter element around -30 of transcription start    |
| <i>CsDof26</i> | TATA-box    | 680            | 686           | core promoter element around -30 of transcription start    |
| <i>CsDof26</i> | TATA-box    | 682            | 688           | core promoter element around -30 of transcription start    |
| <i>CsDof26</i> | TATA-box    | 684            | 688           | core promoter element around -30 of transcription start    |
| <i>CsDof26</i> | TATA-box    | 734            | 738           | core promoter element around -30 of transcription start    |
| <i>CsDof26</i> | TATA-box    | 740            | 744           | core promoter element around -30 of transcription start    |
| <i>CsDof26</i> | TATA-box    | 806            | 811           | core promoter element around -30 of transcription start    |
| <i>CsDof26</i> | TATA-box    | 807            | 811           | core promoter element around -30 of transcription start    |

| Name           | Cis-element | Start position | Stop position | Function                                                            |
|----------------|-------------|----------------|---------------|---------------------------------------------------------------------|
| <i>CsDof26</i> | TATA-box    | 830            | 834           | core promoter element around -30 of transcription start             |
| <i>CsDof26</i> | TATA-box    | 846            | 852           | core promoter element around -30 of transcription start             |
| <i>CsDof26</i> | TATA-box    | 848            | 852           | core promoter element around -30 of transcription start             |
| <i>CsDof26</i> | TATA-box    | 875            | 881           | core promoter element around -30 of transcription start             |
| <i>CsDof26</i> | TATA-box    | 877            | 881           | core promoter element around -30 of transcription start             |
| <i>CsDof26</i> | TATA-box    | 1001           | 1012          | core promoter element around -30 of transcription start             |
| <i>CsDof26</i> | TATA-box    | 1003           | 1011          | core promoter element around -30 of transcription start             |
| <i>CsDof26</i> | TATA-box    | 1004           | 1011          | core promoter element around -30 of transcription start             |
| <i>CsDof26</i> | TATA-box    | 1005           | 1011          | core promoter element around -30 of transcription start             |
| <i>CsDof26</i> | TATA-box    | 1006           | 1011          | core promoter element around -30 of transcription start             |
| <i>CsDof26</i> | TATA-box    | 1007           | 1011          | core promoter element around -30 of transcription start             |
| <i>CsDof26</i> | TATA-box    | 1047           | 1051          | core promoter element around -30 of transcription start             |
| <i>CsDof26</i> | TATA-box    | 1077           | 1081          | core promoter element around -30 of transcription start             |
| <i>CsDof26</i> | TATA-box    | 1132           | 1138          | core promoter element around -30 of transcription start             |
| <i>CsDof26</i> | TATA-box    | 1133           | 1138          | core promoter element around -30 of transcription start             |
| <i>CsDof26</i> | TATA-box    | 1134           | 1138          | core promoter element around -30 of transcription start             |
| <i>CsDof26</i> | TATA-box    | 1551           | 1559          | core promoter element around -30 of transcription start             |
| <i>CsDof26</i> | TATA-box    | 1556           | 1562          | core promoter element around -30 of transcription start             |
| <i>CsDof26</i> | TATA-box    | 1557           | 1561          | core promoter element around -30 of transcription start             |
| <i>CsDof26</i> | TATA-box    | 1646           | 1652          | core promoter element around -30 of transcription start             |
| <i>CsDof26</i> | TATA-box    | 1647           | 1651          | core promoter element around -30 of transcription start             |
| <i>CsDof26</i> | TATA-box    | 1661           | 1668          | core promoter element around -30 of transcription start             |
| <i>CsDof26</i> | TATA-box    | 1768           | 1774          | core promoter element around -30 of transcription start             |
| <i>CsDof26</i> | TATA-box    | 1769           | 1773          | core promoter element around -30 of transcription start             |
| <i>CsDof26</i> | TATA-box    | 1801           | 1810          | core promoter element around -30 of transcription start             |
| <i>CsDof26</i> | TATA-box    | 1802           | 1811          | core promoter element around -30 of transcription start             |
| <i>CsDof26</i> | TATA-box    | 1803           | 1809          | core promoter element around -30 of transcription start             |
| <i>CsDof26</i> | TATA-box    | 1804           | 1811          | core promoter element around -30 of transcription start             |
| <i>CsDof26</i> | TATA-box    | 1805           | 1811          | core promoter element around -30 of transcription start             |
| <i>CsDof26</i> | TATA-box    | 1806           | 1812          | core promoter element around -30 of transcription start             |
| <i>CsDof26</i> | TATA-box    | 1807           | 1811          | core promoter element around -30 of transcription start             |
| <i>CsDof26</i> | TATA-box    | 1951           | 1957          | core promoter element around -30 of transcription start             |
| <i>CsDof26</i> | TATA-box    | 1952           | 1958          | core promoter element around -30 of transcription start             |
| <i>CsDof26</i> | TATA-box    | 1953           | 1957          | core promoter element around -30 of transcription start             |
| <i>CsDof26</i> | GT1-motif   | 1470           | 1476          | light responsive element                                            |
| <i>CsDof27</i> | ABRE        | 754            | 763           | abscisic acid responsiveness                                        |
| <i>CsDof27</i> | ABRE        | 756            | 762           | abscisic acid responsiveness                                        |
| <i>CsDof27</i> | ABRE        | 757            | 762           | abscisic acid responsiveness                                        |
| <i>CsDof27</i> | ABRE        | 958            | 967           | abscisic acid responsiveness                                        |
| <i>CsDof27</i> | ABRE        | 960            | 966           | abscisic acid responsiveness                                        |
| <i>CsDof27</i> | ABRE        | 961            | 966           | abscisic acid responsiveness                                        |
| <i>CsDof27</i> | ABRE        | 1049           | 1055          | abscisic acid responsiveness                                        |
| <i>CsDof27</i> | ABRE        | 1050           | 1055          | abscisic acid responsiveness                                        |
| <i>CsDof27</i> | ABRE        | 1070           | 1075          | abscisic acid responsiveness                                        |
| <i>CsDof27</i> | ABRE        | 1119           | 1125          | abscisic acid responsiveness                                        |
| <i>CsDof27</i> | ABRE        | 1120           | 1125          | abscisic acid responsiveness                                        |
| <i>CsDof27</i> | TATC-box    | 705            | 712           | cis-acting element involved in gibberellin-responsiveness           |
| <i>CsDof27</i> | LTR         | 1093           | 1099          | cis-acting element involved in low-temperature responsiveness       |
| <i>CsDof27</i> | ARE         | 1601           | 1607          | cis-acting regulatory element essential for the anaerobic induction |
| <i>CsDof27</i> | AuxRR-core  | 1036           | 1043          | cis-acting regulatory element involved in auxin responsiveness      |
| <i>CsDof27</i> | G-box       | 753            | 765           | cis-acting regulatory element involved in light responsiveness      |

| Name           | Cis-element | Start position | Stop position | Function                                                          |
|----------------|-------------|----------------|---------------|-------------------------------------------------------------------|
| <i>CsDof27</i> | G-box       | 754            | 763           | cis-acting regulatory element involved in light responsiveness    |
| <i>CsDof27</i> | G-box       | 756            | 762           | cis-acting regulatory element involved in light responsiveness    |
| <i>CsDof27</i> | G-box       | 958            | 967           | cis-acting regulatory element involved in light responsiveness    |
| <i>CsDof27</i> | G-box       | 960            | 966           | cis-acting regulatory element involved in light responsiveness    |
| <i>CsDof27</i> | G-box       | 1049           | 1055          | cis-acting regulatory element involved in light responsiveness    |
| <i>CsDof27</i> | G-box       | 1069           | 1075          | cis-acting regulatory element involved in light responsiveness    |
| <i>CsDof27</i> | G-box       | 1117           | 1126          | cis-acting regulatory element involved in light responsiveness    |
| <i>CsDof27</i> | G-box       | 1119           | 1125          | cis-acting regulatory element involved in light responsiveness    |
| <i>CsDof27</i> | G-Box       | 756            | 762           | cis-acting regulatory element involved in light responsiveness    |
| <i>CsDof27</i> | G-Box       | 960            | 966           | cis-acting regulatory element involved in light responsiveness    |
| <i>CsDof27</i> | G-Box       | 1049           | 1055          | cis-acting regulatory element involved in light responsiveness    |
| <i>CsDof27</i> | G-Box       | 1119           | 1125          | cis-acting regulatory element involved in light responsiveness    |
| <i>CsDof27</i> | TGACG-motif | 416            | 421           | cis-acting regulatory element involved in the MeJA-responsiveness |
| <i>CsDof27</i> | TGACG-motif | 427            | 432           | cis-acting regulatory element involved in the MeJA-responsiveness |
| <i>CsDof27</i> | TGACG-motif | 990            | 995           | cis-acting regulatory element involved in the MeJA-responsiveness |
| <i>CsDof27</i> | TGACG-motif | 1068           | 1073          | cis-acting regulatory element involved in the MeJA-responsiveness |
| <i>CsDof27</i> | TGACG-motif | 1377           | 1382          | cis-acting regulatory element involved in the MeJA-responsiveness |
| <i>CsDof27</i> | TGACG-motif | 1878           | 1883          | cis-acting regulatory element involved in the MeJA-responsiveness |
| <i>CsDof27</i> | CGTCA-motif | 416            | 421           | cis-acting regulatory element involved in the MeJA-responsiveness |
| <i>CsDof27</i> | CGTCA-motif | 427            | 432           | cis-acting regulatory element involved in the MeJA-responsiveness |
| <i>CsDof27</i> | CGTCA-motif | 990            | 995           | cis-acting regulatory element involved in the MeJA-responsiveness |
| <i>CsDof27</i> | CGTCA-motif | 1068           | 1073          | cis-acting regulatory element involved in the MeJA-responsiveness |
| <i>CsDof27</i> | CGTCA-motif | 1377           | 1382          | cis-acting regulatory element involved in the MeJA-responsiveness |
| <i>CsDof27</i> | CGTCA-motif | 1878           | 1883          | cis-acting regulatory element involved in the MeJA-responsiveness |
| <i>CsDof27</i> | CAT-box     | 1715           | 1721          | cis-acting regulatory element related to meristem expression      |
| <i>CsDof27</i> | CAAT-box    | 44             | 49            | common cis-acting element in promoter and enhancer regions        |
| <i>CsDof27</i> | CAAT-box    | 179            | 184           | common cis-acting element in promoter and enhancer regions        |
| <i>CsDof27</i> | CAAT-box    | 645            | 650           | common cis-acting element in promoter and enhancer regions        |
| <i>CsDof27</i> | CAAT-box    | 888            | 893           | common cis-acting element in promoter and enhancer regions        |
| <i>CsDof27</i> | CAAT-box    | 976            | 981           | common cis-acting element in promoter and enhancer regions        |
| <i>CsDof27</i> | CAAT-box    | 1041           | 1046          | common cis-acting element in promoter and enhancer regions        |
| <i>CsDof27</i> | CAAT-box    | 1304           | 1309          | common cis-acting element in promoter and enhancer regions        |
| <i>CsDof27</i> | CAAT-box    | 1409           | 1414          | common cis-acting element in promoter and enhancer regions        |
| <i>CsDof27</i> | TATA-box    | 109            | 113           | core promoter element around -30 of transcription start           |
| <i>CsDof27</i> | TATA-box    | 275            | 283           | core promoter element around -30 of transcription start           |
| <i>CsDof27</i> | TATA-box    | 280            | 286           | core promoter element around -30 of transcription start           |
| <i>CsDof27</i> | TATA-box    | 281            | 286           | core promoter element around -30 of transcription start           |
| <i>CsDof27</i> | TATA-box    | 282            | 286           | core promoter element around -30 of transcription start           |
| <i>CsDof27</i> | TATA-box    | 295            | 299           | core promoter element around -30 of transcription start           |
| <i>CsDof27</i> | TATA-box    | 353            | 359           | core promoter element around -30 of transcription start           |
| <i>CsDof27</i> | TATA-box    | 354            | 358           | core promoter element around -30 of transcription start           |
| <i>CsDof27</i> | TATA-box    | 368            | 373           | core promoter element around -30 of transcription start           |
| <i>CsDof27</i> | TATA-box    | 369            | 373           | core promoter element around -30 of transcription start           |
| <i>CsDof27</i> | TATA-box    | 391            | 395           | core promoter element around -30 of transcription start           |
| <i>CsDof27</i> | TATA-box    | 436            | 443           | core promoter element around -30 of transcription start           |
| <i>CsDof27</i> | TATA-box    | 437            | 443           | core promoter element around -30 of transcription start           |
| <i>CsDof27</i> | TATA-box    | 438            | 443           | core promoter element around -30 of transcription start           |
| <i>CsDof27</i> | TATA-box    | 439            | 443           | core promoter element around -30 of transcription start           |
| <i>CsDof27</i> | TATA-box    | 481            | 485           | core promoter element around -30 of transcription start           |
| <i>CsDof27</i> | TATA-box    | 548            | 554           | core promoter element around -30 of transcription start           |
| <i>CsDof27</i> | TATA-box    | 549            | 554           | core promoter element around -30 of transcription start           |



| Name           | Cis-element | Start position | Stop position | Function                                                            |
|----------------|-------------|----------------|---------------|---------------------------------------------------------------------|
| <i>CsDof27</i> | TATA-box    | 550            | 554           | core promoter element around -30 of transcription start             |
| <i>CsDof27</i> | TATA-box    | 622            | 628           | core promoter element around -30 of transcription start             |
| <i>CsDof27</i> | TATA-box    | 623            | 628           | core promoter element around -30 of transcription start             |
| <i>CsDof27</i> | TATA-box    | 624            | 628           | core promoter element around -30 of transcription start             |
| <i>CsDof27</i> | TATA-box    | 651            | 656           | core promoter element around -30 of transcription start             |
| <i>CsDof27</i> | TATA-box    | 652            | 656           | core promoter element around -30 of transcription start             |
| <i>CsDof27</i> | TATA-box    | 909            | 915           | core promoter element around -30 of transcription start             |
| <i>CsDof27</i> | TATA-box    | 911            | 915           | core promoter element around -30 of transcription start             |
| <i>CsDof27</i> | TATA-box    | 938            | 944           | core promoter element around -30 of transcription start             |
| <i>CsDof27</i> | TATA-box    | 939            | 943           | core promoter element around -30 of transcription start             |
| <i>CsDof27</i> | TATA-box    | 1080           | 1088          | core promoter element around -30 of transcription start             |
| <i>CsDof27</i> | TATA-box    | 1501           | 1508          | core promoter element around -30 of transcription start             |
| <i>CsDof27</i> | TATA-box    | 1576           | 1584          | core promoter element around -30 of transcription start             |
| <i>CsDof27</i> | TATA-box    | 1578           | 1587          | core promoter element around -30 of transcription start             |
| <i>CsDof27</i> | TATA-box    | 1579           | 1584          | core promoter element around -30 of transcription start             |
| <i>CsDof27</i> | TATA-box    | 1580           | 1584          | core promoter element around -30 of transcription start             |
| <i>CsDof27</i> | TATA-box    | 1592           | 1599          | core promoter element around -30 of transcription start             |
| <i>CsDof27</i> | TATA-box    | 1666           | 1672          | core promoter element around -30 of transcription start             |
| <i>CsDof27</i> | TATA-box    | 1667           | 1671          | core promoter element around -30 of transcription start             |
| <i>CsDof27</i> | TATA-box    | 1965           | 1969          | core promoter element around -30 of transcription start             |
| <i>CsDof27</i> | TATA-box    | 1991           | 1998          | core promoter element around -30 of transcription start             |
| <i>CsDof27</i> | TATA-box    | 1992           | 1998          | core promoter element around -30 of transcription start             |
| <i>CsDof27</i> | TATA-box    | 1993           | 1998          | core promoter element around -30 of transcription start             |
| <i>CsDof27</i> | TATA-box    | 1994           | 1998          | core promoter element around -30 of transcription start             |
| <i>CsDof28</i> | ABRE        | 177            | 183           | abscisic acid responsiveness                                        |
| <i>CsDof28</i> | ABRE        | 178            | 183           | abscisic acid responsiveness                                        |
| <i>CsDof28</i> | ABRE        | 628            | 633           | abscisic acid responsiveness                                        |
| <i>CsDof28</i> | ABRE        | 655            | 661           | abscisic acid responsiveness                                        |
| <i>CsDof28</i> | ABRE        | 656            | 661           | abscisic acid responsiveness                                        |
| <i>CsDof28</i> | TGA-element | 194            | 200           | auxin-responsive element                                            |
| <i>CsDof28</i> | TGA-element | 244            | 250           | auxin-responsive element                                            |
| <i>CsDof28</i> | ARE         | 758            | 764           | cis-acting regulatory element essential for the anaerobic induction |
| <i>CsDof28</i> | ARE         | 1444           | 1450          | cis-acting regulatory element essential for the anaerobic induction |
| <i>CsDof28</i> | G-Box       | 177            | 183           | cis-acting regulatory element involved in light responsiveness      |
| <i>CsDof28</i> | G-Box       | 628            | 634           | cis-acting regulatory element involved in light responsiveness      |
| <i>CsDof28</i> | G-Box       | 655            | 661           | cis-acting regulatory element involved in light responsiveness      |
| <i>CsDof28</i> | G-box       | 177            | 183           | cis-acting regulatory element involved in light responsiveness      |
| <i>CsDof28</i> | G-box       | 655            | 661           | cis-acting regulatory element involved in light responsiveness      |
| <i>CsDof28</i> | G-box       | 725            | 731           | cis-acting regulatory element involved in light responsiveness      |
| <i>CsDof28</i> | TGACG-motif | 1266           | 1271          | cis-acting regulatory element involved in the MeJA-responsiveness   |
| <i>CsDof28</i> | CGTCA-motif | 1266           | 1271          | cis-acting regulatory element involved in the MeJA-responsiveness   |
| <i>CsDof28</i> | CAAT-box    | 19             | 24            | common cis-acting element in promoter and enhancer regions          |
| <i>CsDof28</i> | CAAT-box    | 42             | 47            | common cis-acting element in promoter and enhancer regions          |
| <i>CsDof28</i> | CAAT-box    | 93             | 98            | common cis-acting element in promoter and enhancer regions          |
| <i>CsDof28</i> | CAAT-box    | 166            | 171           | common cis-acting element in promoter and enhancer regions          |
| <i>CsDof28</i> | CAAT-box    | 270            | 275           | common cis-acting element in promoter and enhancer regions          |
| <i>CsDof28</i> | CAAT-box    | 526            | 531           | common cis-acting element in promoter and enhancer regions          |
| <i>CsDof28</i> | CAAT-box    | 770            | 775           | common cis-acting element in promoter and enhancer regions          |
| <i>CsDof28</i> | CAAT-box    | 837            | 842           | common cis-acting element in promoter and enhancer regions          |
| <i>CsDof28</i> | CAAT-box    | 953            | 958           | common cis-acting element in promoter and enhancer regions          |
| <i>CsDof28</i> | CAAT-box    | 1025           | 1030          | common cis-acting element in promoter and enhancer regions          |

| Name           | Cis-element | Start position | Stop position | Function                                                   |
|----------------|-------------|----------------|---------------|------------------------------------------------------------|
| <i>CsDof28</i> | CAAT-box    | 1442           | 1447          | common cis-acting element in promoter and enhancer regions |
| <i>CsDof28</i> | CAAT-box    | 1468           | 1473          | common cis-acting element in promoter and enhancer regions |
| <i>CsDof28</i> | CAAT-box    | 1499           | 1504          | common cis-acting element in promoter and enhancer regions |
| <i>CsDof28</i> | CAAT-box    | 1593           | 1598          | common cis-acting element in promoter and enhancer regions |
| <i>CsDof28</i> | TATA-box    | 35             | 41            | core promoter element around -30 of transcription start    |
| <i>CsDof28</i> | TATA-box    | 36             | 41            | core promoter element around -30 of transcription start    |
| <i>CsDof28</i> | TATA-box    | 37             | 41            | core promoter element around -30 of transcription start    |
| <i>CsDof28</i> | TATA-box    | 112            | 118           | core promoter element around -30 of transcription start    |
| <i>CsDof28</i> | TATA-box    | 113            | 117           | core promoter element around -30 of transcription start    |
| <i>CsDof28</i> | TATA-box    | 432            | 438           | core promoter element around -30 of transcription start    |
| <i>CsDof28</i> | TATA-box    | 433            | 439           | core promoter element around -30 of transcription start    |
| <i>CsDof28</i> | TATA-box    | 435            | 439           | core promoter element around -30 of transcription start    |
| <i>CsDof28</i> | TATA-box    | 437            | 445           | core promoter element around -30 of transcription start    |
| <i>CsDof28</i> | TATA-box    | 687            | 694           | core promoter element around -30 of transcription start    |
| <i>CsDof28</i> | TATA-box    | 688            | 694           | core promoter element around -30 of transcription start    |
| <i>CsDof28</i> | TATA-box    | 689            | 694           | core promoter element around -30 of transcription start    |
| <i>CsDof28</i> | TATA-box    | 690            | 694           | core promoter element around -30 of transcription start    |
| <i>CsDof28</i> | TATA-box    | 704            | 710           | core promoter element around -30 of transcription start    |
| <i>CsDof28</i> | TATA-box    | 705            | 711           | core promoter element around -30 of transcription start    |
| <i>CsDof28</i> | TATA-box    | 706            | 710           | core promoter element around -30 of transcription start    |
| <i>CsDof28</i> | TATA-box    | 762            | 770           | core promoter element around -30 of transcription start    |
| <i>CsDof28</i> | TATA-box    | 765            | 770           | core promoter element around -30 of transcription start    |
| <i>CsDof28</i> | TATA-box    | 766            | 770           | core promoter element around -30 of transcription start    |
| <i>CsDof28</i> | TATA-box    | 906            | 912           | core promoter element around -30 of transcription start    |
| <i>CsDof28</i> | TATA-box    | 908            | 912           | core promoter element around -30 of transcription start    |
| <i>CsDof28</i> | TATA-box    | 1046           | 1050          | core promoter element around -30 of transcription start    |
| <i>CsDof28</i> | TATA-box    | 1070           | 1076          | core promoter element around -30 of transcription start    |
| <i>CsDof28</i> | TATA-box    | 1071           | 1077          | core promoter element around -30 of transcription start    |
| <i>CsDof28</i> | TATA-box    | 1072           | 1078          | core promoter element around -30 of transcription start    |
| <i>CsDof28</i> | TATA-box    | 1073           | 1077          | core promoter element around -30 of transcription start    |
| <i>CsDof28</i> | TATA-box    | 1082           | 1091          | core promoter element around -30 of transcription start    |
| <i>CsDof28</i> | TATA-box    | 1083           | 1089          | core promoter element around -30 of transcription start    |
| <i>CsDof28</i> | TATA-box    | 1084           | 1091          | core promoter element around -30 of transcription start    |
| <i>CsDof28</i> | TATA-box    | 1085           | 1091          | core promoter element around -30 of transcription start    |
| <i>CsDof28</i> | TATA-box    | 1086           | 1092          | core promoter element around -30 of transcription start    |
| <i>CsDof28</i> | TATA-box    | 1087           | 1091          | core promoter element around -30 of transcription start    |
| <i>CsDof28</i> | TATA-box    | 1113           | 1119          | core promoter element around -30 of transcription start    |
| <i>CsDof28</i> | TATA-box    | 1114           | 1118          | core promoter element around -30 of transcription start    |
| <i>CsDof28</i> | TATA-box    | 1129           | 1135          | core promoter element around -30 of transcription start    |
| <i>CsDof28</i> | TATA-box    | 1130           | 1134          | core promoter element around -30 of transcription start    |
| <i>CsDof28</i> | TATA-box    | 1207           | 1211          | core promoter element around -30 of transcription start    |
| <i>CsDof28</i> | TATA-box    | 1222           | 1231          | core promoter element around -30 of transcription start    |
| <i>CsDof28</i> | TATA-box    | 1226           | 1232          | core promoter element around -30 of transcription start    |
| <i>CsDof28</i> | TATA-box    | 1227           | 1233          | core promoter element around -30 of transcription start    |
| <i>CsDof28</i> | TATA-box    | 1228           | 1232          | core promoter element around -30 of transcription start    |
| <i>CsDof28</i> | TATA-box    | 1258           | 1264          | core promoter element around -30 of transcription start    |
| <i>CsDof28</i> | TATA-box    | 1259           | 1265          | core promoter element around -30 of transcription start    |
| <i>CsDof28</i> | TATA-box    | 1260           | 1266          | core promoter element around -30 of transcription start    |
| <i>CsDof28</i> | TATA-box    | 1261           | 1265          | core promoter element around -30 of transcription start    |
| <i>CsDof28</i> | TATA-box    | 1285           | 1291          | core promoter element around -30 of transcription start    |
| <i>CsDof28</i> | TATA-box    | 1286           | 1290          | core promoter element around -30 of transcription start    |

| Name           | Cis-element | Start position | Stop position | Function                                                             |
|----------------|-------------|----------------|---------------|----------------------------------------------------------------------|
| <i>CsDof28</i> | TATA-box    | 1298           | 1305          | core promoter element around -30 of transcription start              |
| <i>CsDof28</i> | TATA-box    | 1322           | 1326          | core promoter element around -30 of transcription start              |
| <i>CsDof28</i> | TATA-box    | 1347           | 1354          | core promoter element around -30 of transcription start              |
| <i>CsDof28</i> | TATA-box    | 1393           | 1397          | core promoter element around -30 of transcription start              |
| <i>CsDof28</i> | TATA-box    | 1403           | 1409          | core promoter element around -30 of transcription start              |
| <i>CsDof28</i> | TATA-box    | 1405           | 1409          | core promoter element around -30 of transcription start              |
| <i>CsDof28</i> | TATA-box    | 1528           | 1532          | core promoter element around -30 of transcription start              |
| <i>CsDof28</i> | TATA-box    | 1550           | 1554          | core promoter element around -30 of transcription start              |
| <i>CsDof28</i> | TATA-box    | 1578           | 1584          | core promoter element around -30 of transcription start              |
| <i>CsDof28</i> | TATA-box    | 1579           | 1585          | core promoter element around -30 of transcription start              |
| <i>CsDof28</i> | TATA-box    | 1580           | 1584          | core promoter element around -30 of transcription start              |
| <i>CsDof28</i> | TATA-box    | 1641           | 1650          | core promoter element around -30 of transcription start              |
| <i>CsDof28</i> | TATA-box    | 1650           | 1656          | core promoter element around -30 of transcription start              |
| <i>CsDof28</i> | TATA-box    | 1651           | 1657          | core promoter element around -30 of transcription start              |
| <i>CsDof28</i> | TATA-box    | 1652           | 1658          | core promoter element around -30 of transcription start              |
| <i>CsDof28</i> | TATA-box    | 1653           | 1657          | core promoter element around -30 of transcription start              |
| <i>CsDof28</i> | TATA-box    | 1758           | 1764          | core promoter element around -30 of transcription start              |
| <i>CsDof28</i> | TATA-box    | 1759           | 1764          | core promoter element around -30 of transcription start              |
| <i>CsDof28</i> | TATA-box    | 1760           | 1764          | core promoter element around -30 of transcription start              |
| <i>CsDof28</i> | P-box       | 1731           | 1738          | gibberellin-responsive element                                       |
| <i>CsDof28</i> | GT1-motif   | 9              | 15            | light responsive element                                             |
| <i>CsDof28</i> | Sp1         | 1310           | 1316          | light responsive element                                             |
| <i>CsDof28</i> | MBS         | 287            | 293           | MYB binding site involved in drought-inducibility                    |
| <i>CsDof28</i> | MRE         | 1200           | 1207          | MYB binding site involved in light responsiveness                    |
| <i>CsDof28</i> | HD-Zip 3    | 1537           | 1547          | protein binding site                                                 |
| <i>CsDof29</i> | ABRE        | 1000           | 1007          | abscisic acid responsiveness                                         |
| <i>CsDof29</i> | ABRE        | 1453           | 1458          | abscisic acid responsiveness                                         |
| <i>CsDof29</i> | ABRE        | 1750           | 1755          | abscisic acid responsiveness                                         |
| <i>CsDof29</i> | TGA-element | 195            | 201           | auxin-responsive element                                             |
| <i>CsDof29</i> | ARE         | 362            | 368           | cis-acting regulatory element essential for the anaerobic induction  |
| <i>CsDof29</i> | ARE         | 442            | 448           | cis-acting regulatory element essential for the anaerobic induction  |
| <i>CsDof29</i> | G-Box       | 1452           | 1458          | cis-acting regulatory element involved in light responsiveness       |
| <i>CsDof29</i> | G-Box       | 1750           | 1756          | cis-acting regulatory element involved in light responsiveness       |
| <i>CsDof29</i> | O2-site     | 1308           | 1318          | cis-acting regulatory element involved in zein metabolism regulation |
| <i>CsDof29</i> | GCN4_motif  | 1096           | 1103          | cis-regulatory element involved in endosperm expression              |
| <i>CsDof29</i> | CAAT-box    | 166            | 171           | common cis-acting element in promoter and enhancer regions           |
| <i>CsDof29</i> | CAAT-box    | 180            | 185           | common cis-acting element in promoter and enhancer regions           |
| <i>CsDof29</i> | CAAT-box    | 287            | 292           | common cis-acting element in promoter and enhancer regions           |
| <i>CsDof29</i> | CAAT-box    | 342            | 347           | common cis-acting element in promoter and enhancer regions           |
| <i>CsDof29</i> | CAAT-box    | 466            | 471           | common cis-acting element in promoter and enhancer regions           |
| <i>CsDof29</i> | CAAT-box    | 581            | 586           | common cis-acting element in promoter and enhancer regions           |
| <i>CsDof29</i> | CAAT-box    | 980            | 985           | common cis-acting element in promoter and enhancer regions           |
| <i>CsDof29</i> | CAAT-box    | 1120           | 1125          | common cis-acting element in promoter and enhancer regions           |
| <i>CsDof29</i> | CAAT-box    | 1343           | 1348          | common cis-acting element in promoter and enhancer regions           |
| <i>CsDof29</i> | CAAT-box    | 1635           | 1640          | common cis-acting element in promoter and enhancer regions           |
| <i>CsDof29</i> | CAAT-box    | 1836           | 1841          | common cis-acting element in promoter and enhancer regions           |
| <i>CsDof29</i> | TATA-box    | 13             | 17            | core promoter element around -30 of transcription start              |
| <i>CsDof29</i> | TATA-box    | 222            | 228           | core promoter element around -30 of transcription start              |
| <i>CsDof29</i> | TATA-box    | 223            | 229           | core promoter element around -30 of transcription start              |
| <i>CsDof29</i> | TATA-box    | 225            | 229           | core promoter element around -30 of transcription start              |
| <i>CsDof29</i> | TATA-box    | 253            | 259           | core promoter element around -30 of transcription start              |



| Name           | Cis-element | Start position | Stop position | Function                                                            |
|----------------|-------------|----------------|---------------|---------------------------------------------------------------------|
| <i>CsDof29</i> | TATA-box    | 1509           | 1515          | core promoter element around -30 of transcription start             |
| <i>CsDof29</i> | TATA-box    | 1510           | 1516          | core promoter element around -30 of transcription start             |
| <i>CsDof29</i> | TATA-box    | 1511           | 1517          | core promoter element around -30 of transcription start             |
| <i>CsDof29</i> | TATA-box    | 1512           | 1518          | core promoter element around -30 of transcription start             |
| <i>CsDof29</i> | TATA-box    | 1513           | 1519          | core promoter element around -30 of transcription start             |
| <i>CsDof29</i> | TATA-box    | 1514           | 1520          | core promoter element around -30 of transcription start             |
| <i>CsDof29</i> | TATA-box    | 1515           | 1521          | core promoter element around -30 of transcription start             |
| <i>CsDof29</i> | TATA-box    | 1516           | 1522          | core promoter element around -30 of transcription start             |
| <i>CsDof29</i> | TATA-box    | 1517           | 1523          | core promoter element around -30 of transcription start             |
| <i>CsDof29</i> | TATA-box    | 1518           | 1524          | core promoter element around -30 of transcription start             |
| <i>CsDof29</i> | TATA-box    | 1519           | 1525          | core promoter element around -30 of transcription start             |
| <i>CsDof29</i> | TATA-box    | 1521           | 1525          | core promoter element around -30 of transcription start             |
| <i>CsDof29</i> | TATA-box    | 1629           | 1635          | core promoter element around -30 of transcription start             |
| <i>CsDof29</i> | TATA-box    | 1630           | 1634          | core promoter element around -30 of transcription start             |
| <i>CsDof29</i> | TATA-box    | 1669           | 1675          | core promoter element around -30 of transcription start             |
| <i>CsDof29</i> | TATA-box    | 1671           | 1675          | core promoter element around -30 of transcription start             |
| <i>CsDof29</i> | TATA-box    | 1810           | 1816          | core promoter element around -30 of transcription start             |
| <i>CsDof29</i> | TATA-box    | 1811           | 1815          | core promoter element around -30 of transcription start             |
| <i>CsDof29</i> | TATA-box    | 1868           | 1874          | core promoter element around -30 of transcription start             |
| <i>CsDof29</i> | TATA-box    | 1869           | 1875          | core promoter element around -30 of transcription start             |
| <i>CsDof29</i> | TATA-box    | 1870           | 1876          | core promoter element around -30 of transcription start             |
| <i>CsDof29</i> | TATA-box    | 1872           | 1876          | core promoter element around -30 of transcription start             |
| <i>CsDof29</i> | TATA-box    | 1900           | 1909          | core promoter element around -30 of transcription start             |
| <i>CsDof29</i> | TATA-box    | 1901           | 1907          | core promoter element around -30 of transcription start             |
| <i>CsDof29</i> | TATA-box    | 1902           | 1909          | core promoter element around -30 of transcription start             |
| <i>CsDof29</i> | TATA-box    | 1903           | 1909          | core promoter element around -30 of transcription start             |
| <i>CsDof29</i> | TATA-box    | 1904           | 1910          | core promoter element around -30 of transcription start             |
| <i>CsDof29</i> | TATA-box    | 1905           | 1909          | core promoter element around -30 of transcription start             |
| <i>CsDof29</i> | MBS         | 421            | 427           | MYB binding site involved in drought-inducibility                   |
| <i>CsDof30</i> | ABRE        | 1420           | 1425          | abscisic acid responsiveness                                        |
| <i>CsDof30</i> | ARE         | 1843           | 1849          | cis-acting regulatory element essential for the anaerobic induction |
| <i>CsDof30</i> | AuxRR-core  | 1609           | 1616          | cis-acting regulatory element involved in auxin responsiveness      |
| <i>CsDof30</i> | G-box       | 1419           | 1425          | cis-acting regulatory element involved in light responsiveness      |
| <i>CsDof30</i> | CGTCA-motif | 1418           | 1423          | cis-acting regulatory element involved in the MeJA-responsiveness   |
| <i>CsDof30</i> | TGACG-motif | 1418           | 1423          | cis-acting regulatory element involved in the MeJA-responsiveness   |
| <i>CsDof30</i> | CAT-box     | 1031           | 1037          | cis-acting regulatory element related to meristem expression        |
| <i>CsDof30</i> | CAAT-box    | 7              | 12            | common cis-acting element in promoter and enhancer regions          |
| <i>CsDof30</i> | CAAT-box    | 32             | 37            | common cis-acting element in promoter and enhancer regions          |
| <i>CsDof30</i> | CAAT-box    | 93             | 98            | common cis-acting element in promoter and enhancer regions          |
| <i>CsDof30</i> | CAAT-box    | 190            | 195           | common cis-acting element in promoter and enhancer regions          |
| <i>CsDof30</i> | CAAT-box    | 367            | 372           | common cis-acting element in promoter and enhancer regions          |
| <i>CsDof30</i> | CAAT-box    | 711            | 716           | common cis-acting element in promoter and enhancer regions          |
| <i>CsDof30</i> | CAAT-box    | 767            | 772           | common cis-acting element in promoter and enhancer regions          |
| <i>CsDof30</i> | CAAT-box    | 877            | 882           | common cis-acting element in promoter and enhancer regions          |
| <i>CsDof30</i> | CAAT-box    | 1406           | 1411          | common cis-acting element in promoter and enhancer regions          |
| <i>CsDof30</i> | CAAT-box    | 1655           | 1660          | common cis-acting element in promoter and enhancer regions          |
| <i>CsDof30</i> | CAAT-box    | 1866           | 1871          | common cis-acting element in promoter and enhancer regions          |
| <i>CsDof30</i> | TATA-box    | 16             | 22            | core promoter element around -30 of transcription start             |
| <i>CsDof30</i> | TATA-box    | 17             | 23            | core promoter element around -30 of transcription start             |
| <i>CsDof30</i> | TATA-box    | 18             | 24            | core promoter element around -30 of transcription start             |
| <i>CsDof30</i> | TATA-box    | 19             | 23            | core promoter element around -30 of transcription start             |



| Name           | Cis-element | Start position | Stop position | Function                                                            |
|----------------|-------------|----------------|---------------|---------------------------------------------------------------------|
| <i>CsDof30</i> | TATA-box    | 1311           | 1317          | core promoter element around -30 of transcription start             |
| <i>CsDof30</i> | TATA-box    | 1312           | 1318          | core promoter element around -30 of transcription start             |
| <i>CsDof30</i> | TATA-box    | 1313           | 1317          | core promoter element around -30 of transcription start             |
| <i>CsDof30</i> | TATA-box    | 1439           | 1446          | core promoter element around -30 of transcription start             |
| <i>CsDof30</i> | TATA-box    | 1440           | 1446          | core promoter element around -30 of transcription start             |
| <i>CsDof30</i> | TATA-box    | 1441           | 1446          | core promoter element around -30 of transcription start             |
| <i>CsDof30</i> | TATA-box    | 1442           | 1446          | core promoter element around -30 of transcription start             |
| <i>CsDof30</i> | TATA-box    | 1620           | 1632          | core promoter element around -30 of transcription start             |
| <i>CsDof30</i> | TATA-box    | 1622           | 1628          | core promoter element around -30 of transcription start             |
| <i>CsDof30</i> | TATA-box    | 1623           | 1629          | core promoter element around -30 of transcription start             |
| <i>CsDof30</i> | TATA-box    | 1624           | 1630          | core promoter element around -30 of transcription start             |
| <i>CsDof30</i> | TATA-box    | 1625           | 1631          | core promoter element around -30 of transcription start             |
| <i>CsDof30</i> | TATA-box    | 1626           | 1632          | core promoter element around -30 of transcription start             |
| <i>CsDof30</i> | TATA-box    | 1627           | 1633          | core promoter element around -30 of transcription start             |
| <i>CsDof30</i> | TATA-box    | 1628           | 1634          | core promoter element around -30 of transcription start             |
| <i>CsDof30</i> | TATA-box    | 1629           | 1635          | core promoter element around -30 of transcription start             |
| <i>CsDof30</i> | TATA-box    | 1630           | 1636          | core promoter element around -30 of transcription start             |
| <i>CsDof30</i> | TATA-box    | 1631           | 1637          | core promoter element around -30 of transcription start             |
| <i>CsDof30</i> | TATA-box    | 1632           | 1638          | core promoter element around -30 of transcription start             |
| <i>CsDof30</i> | TATA-box    | 1633           | 1639          | core promoter element around -30 of transcription start             |
| <i>CsDof30</i> | TATA-box    | 1634           | 1640          | core promoter element around -30 of transcription start             |
| <i>CsDof30</i> | TATA-box    | 1635           | 1641          | core promoter element around -30 of transcription start             |
| <i>CsDof30</i> | TATA-box    | 1636           | 1642          | core promoter element around -30 of transcription start             |
| <i>CsDof30</i> | TATA-box    | 1637           | 1643          | core promoter element around -30 of transcription start             |
| <i>CsDof30</i> | TATA-box    | 1639           | 1643          | core promoter element around -30 of transcription start             |
| <i>CsDof30</i> | TATA-box    | 1660           | 1664          | core promoter element around -30 of transcription start             |
| <i>CsDof30</i> | TATA-box    | 1835           | 1841          | core promoter element around -30 of transcription start             |
| <i>CsDof30</i> | TATA-box    | 1836           | 1842          | core promoter element around -30 of transcription start             |
| <i>CsDof30</i> | TATA-box    | 1837           | 1841          | core promoter element around -30 of transcription start             |
| <i>CsDof30</i> | P-box       | 306            | 313           | gibberellin-responsive element                                      |
| <i>CsDof30</i> | GT1-motif   | 1481           | 1490          | light responsive element                                            |
| <i>CsDof30</i> | MBS         | 1847           | 1853          | MYB binding site involved in drought-inducibility                   |
| <i>CsDof31</i> | ABRE        | 603            | 608           | abscisic acid responsiveness                                        |
| <i>CsDof31</i> | ABRE        | 931            | 938           | abscisic acid responsiveness                                        |
| <i>CsDof31</i> | ABRE        | 1021           | 1030          | abscisic acid responsiveness                                        |
| <i>CsDof31</i> | ABRE        | 1024           | 1029          | abscisic acid responsiveness                                        |
| <i>CsDof31</i> | TGA-element | 1357           | 1363          | auxin-responsive element                                            |
| <i>CsDof31</i> | LTR         | 126            | 132           | cis-acting element involved in low-temperature responsiveness       |
| <i>CsDof31</i> | ARE         | 1009           | 1015          | cis-acting regulatory element essential for the anaerobic induction |
| <i>CsDof31</i> | ARE         | 1313           | 1319          | cis-acting regulatory element essential for the anaerobic induction |
| <i>CsDof31</i> | ARE         | 1840           | 1846          | cis-acting regulatory element essential for the anaerobic induction |
| <i>CsDof31</i> | G-Box       | 602            | 608           | cis-acting regulatory element involved in light responsiveness      |
| <i>CsDof31</i> | G-Box       | 1023           | 1029          | cis-acting regulatory element involved in light responsiveness      |
| <i>CsDof31</i> | CGTCA-motif | 1148           | 1153          | cis-acting regulatory element involved in the MeJA-responsiveness   |
| <i>CsDof31</i> | TGACG-motif | 1148           | 1153          | cis-acting regulatory element involved in the MeJA-responsiveness   |
| <i>CsDof31</i> | CAT-box     | 255            | 261           | cis-acting regulatory element related to meristem expression        |
| <i>CsDof31</i> | CAAT-box    | 87             | 92            | common cis-acting element in promoter and enhancer regions          |
| <i>CsDof31</i> | CAAT-box    | 90             | 95            | common cis-acting element in promoter and enhancer regions          |
| <i>CsDof31</i> | CAAT-box    | 142            | 147           | common cis-acting element in promoter and enhancer regions          |
| <i>CsDof31</i> | CAAT-box    | 211            | 216           | common cis-acting element in promoter and enhancer regions          |
| <i>CsDof31</i> | CAAT-box    | 333            | 338           | common cis-acting element in promoter and enhancer regions          |

| Name           | Cis-element | Start position | Stop position | Function                                                   |
|----------------|-------------|----------------|---------------|------------------------------------------------------------|
| <i>CsDof31</i> | CAAT-box    | 437            | 442           | common cis-acting element in promoter and enhancer regions |
| <i>CsDof31</i> | CAAT-box    | 499            | 504           | common cis-acting element in promoter and enhancer regions |
| <i>CsDof31</i> | CAAT-box    | 532            | 537           | common cis-acting element in promoter and enhancer regions |
| <i>CsDof31</i> | CAAT-box    | 554            | 559           | common cis-acting element in promoter and enhancer regions |
| <i>CsDof31</i> | CAAT-box    | 570            | 575           | common cis-acting element in promoter and enhancer regions |
| <i>CsDof31</i> | CAAT-box    | 720            | 725           | common cis-acting element in promoter and enhancer regions |
| <i>CsDof31</i> | CAAT-box    | 1382           | 1387          | common cis-acting element in promoter and enhancer regions |
| <i>CsDof31</i> | CAAT-box    | 1421           | 1426          | common cis-acting element in promoter and enhancer regions |
| <i>CsDof31</i> | CAAT-box    | 1654           | 1664          | common cis-acting element in promoter and enhancer regions |
| <i>CsDof31</i> | CAAT-box    | 1657           | 1662          | common cis-acting element in promoter and enhancer regions |
| <i>CsDof31</i> | TATA-box    | 19             | 23            | core promoter element around -30 of transcription start    |
| <i>CsDof31</i> | TATA-box    | 28             | 34            | core promoter element around -30 of transcription start    |
| <i>CsDof31</i> | TATA-box    | 29             | 35            | core promoter element around -30 of transcription start    |
| <i>CsDof31</i> | TATA-box    | 30             | 36            | core promoter element around -30 of transcription start    |
| <i>CsDof31</i> | TATA-box    | 31             | 35            | core promoter element around -30 of transcription start    |
| <i>CsDof31</i> | TATA-box    | 100            | 106           | core promoter element around -30 of transcription start    |
| <i>CsDof31</i> | TATA-box    | 102            | 106           | core promoter element around -30 of transcription start    |
| <i>CsDof31</i> | TATA-box    | 176            | 183           | core promoter element around -30 of transcription start    |
| <i>CsDof31</i> | TATA-box    | 177            | 183           | core promoter element around -30 of transcription start    |
| <i>CsDof31</i> | TATA-box    | 179            | 183           | core promoter element around -30 of transcription start    |
| <i>CsDof31</i> | TATA-box    | 313            | 319           | core promoter element around -30 of transcription start    |
| <i>CsDof31</i> | TATA-box    | 315            | 319           | core promoter element around -30 of transcription start    |
| <i>CsDof31</i> | TATA-box    | 408            | 412           | core promoter element around -30 of transcription start    |
| <i>CsDof31</i> | TATA-box    | 502            | 508           | core promoter element around -30 of transcription start    |
| <i>CsDof31</i> | TATA-box    | 503            | 508           | core promoter element around -30 of transcription start    |
| <i>CsDof31</i> | TATA-box    | 504            | 508           | core promoter element around -30 of transcription start    |
| <i>CsDof31</i> | TATA-box    | 579            | 586           | core promoter element around -30 of transcription start    |
| <i>CsDof31</i> | TATA-box    | 734            | 738           | core promoter element around -30 of transcription start    |
| <i>CsDof31</i> | TATA-box    | 739            | 743           | core promoter element around -30 of transcription start    |
| <i>CsDof31</i> | TATA-box    | 829            | 836           | core promoter element around -30 of transcription start    |
| <i>CsDof31</i> | TATA-box    | 830            | 836           | core promoter element around -30 of transcription start    |
| <i>CsDof31</i> | TATA-box    | 831            | 837           | core promoter element around -30 of transcription start    |
| <i>CsDof31</i> | TATA-box    | 832            | 836           | core promoter element around -30 of transcription start    |
| <i>CsDof31</i> | TATA-box    | 836            | 842           | core promoter element around -30 of transcription start    |
| <i>CsDof31</i> | TATA-box    | 837            | 844           | core promoter element around -30 of transcription start    |
| <i>CsDof31</i> | TATA-box    | 838            | 844           | core promoter element around -30 of transcription start    |
| <i>CsDof31</i> | TATA-box    | 839            | 845           | core promoter element around -30 of transcription start    |
| <i>CsDof31</i> | TATA-box    | 840            | 844           | core promoter element around -30 of transcription start    |
| <i>CsDof31</i> | TATA-box    | 851            | 857           | core promoter element around -30 of transcription start    |
| <i>CsDof31</i> | TATA-box    | 853            | 859           | core promoter element around -30 of transcription start    |
| <i>CsDof31</i> | TATA-box    | 854            | 860           | core promoter element around -30 of transcription start    |
| <i>CsDof31</i> | TATA-box    | 855            | 859           | core promoter element around -30 of transcription start    |
| <i>CsDof31</i> | TATA-box    | 861            | 867           | core promoter element around -30 of transcription start    |
| <i>CsDof31</i> | TATA-box    | 862            | 866           | core promoter element around -30 of transcription start    |
| <i>CsDof31</i> | TATA-box    | 877            | 885           | core promoter element around -30 of transcription start    |
| <i>CsDof31</i> | TATA-box    | 1013           | 1020          | core promoter element around -30 of transcription start    |
| <i>CsDof31</i> | TATA-box    | 1014           | 1020          | core promoter element around -30 of transcription start    |
| <i>CsDof31</i> | TATA-box    | 1015           | 1020          | core promoter element around -30 of transcription start    |
| <i>CsDof31</i> | TATA-box    | 1016           | 1020          | core promoter element around -30 of transcription start    |
| <i>CsDof31</i> | TATA-box    | 1133           | 1139          | core promoter element around -30 of transcription start    |
| <i>CsDof31</i> | TATA-box    | 1134           | 1140          | core promoter element around -30 of transcription start    |



| Name           | Cis-element      | Start position | Stop position | Function                                                             |
|----------------|------------------|----------------|---------------|----------------------------------------------------------------------|
| <i>CsDof31</i> | TATA-box         | 1135           | 1141          | core promoter element around -30 of transcription start              |
| <i>CsDof31</i> | TATA-box         | 1136           | 1140          | core promoter element around -30 of transcription start              |
| <i>CsDof31</i> | TATA-box         | 1223           | 1230          | core promoter element around -30 of transcription start              |
| <i>CsDof31</i> | TATA-box         | 1224           | 1230          | core promoter element around -30 of transcription start              |
| <i>CsDof31</i> | TATA-box         | 1225           | 1230          | core promoter element around -30 of transcription start              |
| <i>CsDof31</i> | TATA-box         | 1226           | 1230          | core promoter element around -30 of transcription start              |
| <i>CsDof31</i> | TATA-box         | 1253           | 1259          | core promoter element around -30 of transcription start              |
| <i>CsDof31</i> | TATA-box         | 1254           | 1260          | core promoter element around -30 of transcription start              |
| <i>CsDof31</i> | TATA-box         | 1255           | 1261          | core promoter element around -30 of transcription start              |
| <i>CsDof31</i> | TATA-box         | 1256           | 1260          | core promoter element around -30 of transcription start              |
| <i>CsDof31</i> | TATA-box         | 1301           | 1307          | core promoter element around -30 of transcription start              |
| <i>CsDof31</i> | TATA-box         | 1302           | 1307          | core promoter element around -30 of transcription start              |
| <i>CsDof31</i> | TATA-box         | 1303           | 1307          | core promoter element around -30 of transcription start              |
| <i>CsDof31</i> | TATA-box         | 1415           | 1419          | core promoter element around -30 of transcription start              |
| <i>CsDof31</i> | TATA-box         | 1674           | 1682          | core promoter element around -30 of transcription start              |
| <i>CsDof31</i> | TATA-box         | 1678           | 1684          | core promoter element around -30 of transcription start              |
| <i>CsDof31</i> | TATA-box         | 1679           | 1684          | core promoter element around -30 of transcription start              |
| <i>CsDof31</i> | TATA-box         | 1680           | 1684          | core promoter element around -30 of transcription start              |
| <i>CsDof31</i> | TATA-box         | 1900           | 1904          | core promoter element around -30 of transcription start              |
| <i>CsDof31</i> | AT-rich sequence | 764            | 773           | element for maximal elicitor-mediated activation (2copies)           |
| <i>CsDof31</i> | P-box            | 384            | 391           | gibberellin-responsive element                                       |
| <i>CsDof31</i> | Sp1              | 246            | 252           | light responsive element                                             |
| <i>CsDof31</i> | GT1-motif        | 557            | 564           | light responsive element                                             |
| <i>CsDof31</i> | GT1-motif        | 558            | 564           | light responsive element                                             |
| <i>CsDof31</i> | GT1-motif        | 1722           | 1729          | light responsive element                                             |
| <i>CsDof31</i> | GT1-motif        | 1723           | 1729          | light responsive element                                             |
| <i>CsDof31</i> | GT1-motif        | 1932           | 1938          | light responsive element                                             |
| <i>CsDof31</i> | MRE              | 39             | 46            | MYB binding site involved in light responsiveness                    |
| <i>CsDof31</i> | CCAAT-box        | 1319           | 1325          | MYBHv1 binding site                                                  |
| <i>CsDof32</i> | ABRE             | 1897           | 1903          | abscisic acid responsiveness                                         |
| <i>CsDof32</i> | ABRE             | 1898           | 1903          | abscisic acid responsiveness                                         |
| <i>CsDof32</i> | TC-rich repeats  | 95             | 104           | cis-acting element involved in defense and stress responsiveness     |
| <i>CsDof32</i> | ARE              | 1082           | 1088          | cis-acting regulatory element essential for the anaerobic induction  |
| <i>CsDof32</i> | G-box            | 1387           | 1393          | cis-acting regulatory element involved in light responsiveness       |
| <i>CsDof32</i> | G-box            | 1896           | 1905          | cis-acting regulatory element involved in light responsiveness       |
| <i>CsDof32</i> | G-box            | 1897           | 1903          | cis-acting regulatory element involved in light responsiveness       |
| <i>CsDof32</i> | G-Box            | 1897           | 1903          | cis-acting regulatory element involved in light responsiveness       |
| <i>CsDof32</i> | RY-element       | 1943           | 1951          | cis-acting regulatory element involved in seed-specific regulation   |
| <i>CsDof32</i> | CGTCA-motif      | 893            | 898           | cis-acting regulatory element involved in the MeJA-responsiveness    |
| <i>CsDof32</i> | TGACG-motif      | 893            | 898           | cis-acting regulatory element involved in the MeJA-responsiveness    |
| <i>CsDof32</i> | O2-site          | 672            | 680           | cis-acting regulatory element involved in zein metabolism regulation |
| <i>CsDof32</i> | CAT-box          | 461            | 467           | cis-acting regulatory element related to meristem expression         |
| <i>CsDof32</i> | CAAT-box         | 156            | 161           | common cis-acting element in promoter and enhancer regions           |
| <i>CsDof32</i> | CAAT-box         | 475            | 480           | common cis-acting element in promoter and enhancer regions           |
| <i>CsDof32</i> | CAAT-box         | 712            | 717           | common cis-acting element in promoter and enhancer regions           |
| <i>CsDof32</i> | CAAT-box         | 737            | 742           | common cis-acting element in promoter and enhancer regions           |
| <i>CsDof32</i> | CAAT-box         | 929            | 934           | common cis-acting element in promoter and enhancer regions           |
| <i>CsDof32</i> | CAAT-box         | 1227           | 1232          | common cis-acting element in promoter and enhancer regions           |
| <i>CsDof32</i> | CAAT-box         | 1465           | 1470          | common cis-acting element in promoter and enhancer regions           |
| <i>CsDof32</i> | CAAT-box         | 1639           | 1644          | common cis-acting element in promoter and enhancer regions           |
| <i>CsDof32</i> | CAAT-box         | 1658           | 1663          | common cis-acting element in promoter and enhancer regions           |

| Name           | Cis-element     | Start position | Stop position | Function                                                         |
|----------------|-----------------|----------------|---------------|------------------------------------------------------------------|
| <i>CsDof32</i> | CAAT-box        | 1861           | 1866          | common cis-acting element in promoter and enhancer regions       |
| <i>CsDof32</i> | TATA-box        | 41             | 45            | core promoter element around -30 of transcription start          |
| <i>CsDof32</i> | TATA-box        | 135            | 141           | core promoter element around -30 of transcription start          |
| <i>CsDof32</i> | TATA-box        | 136            | 141           | core promoter element around -30 of transcription start          |
| <i>CsDof32</i> | TATA-box        | 137            | 141           | core promoter element around -30 of transcription start          |
| <i>CsDof32</i> | TATA-box        | 483            | 490           | core promoter element around -30 of transcription start          |
| <i>CsDof32</i> | TATA-box        | 945            | 949           | core promoter element around -30 of transcription start          |
| <i>CsDof32</i> | TATA-box        | 1093           | 1100          | core promoter element around -30 of transcription start          |
| <i>CsDof32</i> | TATA-box        | 1094           | 1100          | core promoter element around -30 of transcription start          |
| <i>CsDof32</i> | TATA-box        | 1095           | 1101          | core promoter element around -30 of transcription start          |
| <i>CsDof32</i> | TATA-box        | 1096           | 1100          | core promoter element around -30 of transcription start          |
| <i>CsDof32</i> | TATA-box        | 1126           | 1133          | core promoter element around -30 of transcription start          |
| <i>CsDof32</i> | TATA-box        | 1127           | 1133          | core promoter element around -30 of transcription start          |
| <i>CsDof32</i> | TATA-box        | 1128           | 1135          | core promoter element around -30 of transcription start          |
| <i>CsDof32</i> | TATA-box        | 1129           | 1135          | core promoter element around -30 of transcription start          |
| <i>CsDof32</i> | TATA-box        | 1131           | 1135          | core promoter element around -30 of transcription start          |
| <i>CsDof32</i> | TATA-box        | 1277           | 1281          | core promoter element around -30 of transcription start          |
| <i>CsDof32</i> | TATA-box        | 1349           | 1355          | core promoter element around -30 of transcription start          |
| <i>CsDof32</i> | TATA-box        | 1350           | 1355          | core promoter element around -30 of transcription start          |
| <i>CsDof32</i> | TATA-box        | 1351           | 1355          | core promoter element around -30 of transcription start          |
| <i>CsDof32</i> | TATA-box        | 1394           | 1400          | core promoter element around -30 of transcription start          |
| <i>CsDof32</i> | TATA-box        | 1395           | 1399          | core promoter element around -30 of transcription start          |
| <i>CsDof32</i> | TATA-box        | 1477           | 1483          | core promoter element around -30 of transcription start          |
| <i>CsDof32</i> | TATA-box        | 1478           | 1484          | core promoter element around -30 of transcription start          |
| <i>CsDof32</i> | TATA-box        | 1480           | 1484          | core promoter element around -30 of transcription start          |
| <i>CsDof32</i> | TATA-box        | 1491           | 1496          | core promoter element around -30 of transcription start          |
| <i>CsDof32</i> | TATA-box        | 1492           | 1496          | core promoter element around -30 of transcription start          |
| <i>CsDof32</i> | TATA-box        | 1516           | 1522          | core promoter element around -30 of transcription start          |
| <i>CsDof32</i> | TATA-box        | 1517           | 1521          | core promoter element around -30 of transcription start          |
| <i>CsDof32</i> | TATA-box        | 1569           | 1574          | core promoter element around -30 of transcription start          |
| <i>CsDof32</i> | TATA-box        | 1570           | 1574          | core promoter element around -30 of transcription start          |
| <i>CsDof32</i> | TATA-box        | 1575           | 1579          | core promoter element around -30 of transcription start          |
| <i>CsDof32</i> | TATA-box        | 1600           | 1606          | core promoter element around -30 of transcription start          |
| <i>CsDof32</i> | TATA-box        | 1601           | 1607          | core promoter element around -30 of transcription start          |
| <i>CsDof32</i> | TATA-box        | 1603           | 1607          | core promoter element around -30 of transcription start          |
| <i>CsDof32</i> | TATA-box        | 1773           | 1777          | core promoter element around -30 of transcription start          |
| <i>CsDof32</i> | TATA-box        | 1789           | 1795          | core promoter element around -30 of transcription start          |
| <i>CsDof32</i> | TATA-box        | 1790           | 1796          | core promoter element around -30 of transcription start          |
| <i>CsDof32</i> | TATA-box        | 1791           | 1795          | core promoter element around -30 of transcription start          |
| <i>CsDof32</i> | TATA-box        | 1953           | 1959          | core promoter element around -30 of transcription start          |
| <i>CsDof32</i> | TATA-box        | 1954           | 1960          | core promoter element around -30 of transcription start          |
| <i>CsDof32</i> | TATA-box        | 1955           | 1959          | core promoter element around -30 of transcription start          |
| <i>CsDof32</i> | P-box           | 396            | 403           | gibberellin-responsive element                                   |
| <i>CsDof32</i> | P-box           | 539            | 546           | gibberellin-responsive element                                   |
| <i>CsDof32</i> | GT1-motif       | 1732           | 1739          | light responsive element                                         |
| <i>CsDof32</i> | GT1-motif       | 1733           | 1739          | light responsive element                                         |
| <i>CsDof32</i> | GT1-motif       | 1812           | 1818          | light responsive element                                         |
| <i>CsDof32</i> | CCAAT-box       | 79             | 85            | MYBHv1 binding site                                              |
| <i>CsDof32</i> | A-box           | 948            | 960           | sequence conserved in alpha-amylase promoters                    |
| <i>CsDof33</i> | TGA-element     | 1266           | 1272          | auxin-responsive element                                         |
| <i>CsDof33</i> | TC-rich repeats | 1245           | 1254          | cis-acting element involved in defense and stress responsiveness |

| Name           | Cis-element | Start position | Stop position | Function                                                             |
|----------------|-------------|----------------|---------------|----------------------------------------------------------------------|
| <i>CsDof33</i> | LTR         | 523            | 529           | cis-acting element involved in low-temperature responsiveness        |
| <i>CsDof33</i> | ARE         | 389            | 395           | cis-acting regulatory element essential for the anaerobic induction  |
| <i>CsDof33</i> | ARE         | 773            | 779           | cis-acting regulatory element essential for the anaerobic induction  |
| <i>CsDof33</i> | ARE         | 1988           | 1994          | cis-acting regulatory element essential for the anaerobic induction  |
| <i>CsDof33</i> | CGTCA-motif | 892            | 897           | cis-acting regulatory element involved in the MeJA-responsiveness    |
| <i>CsDof33</i> | CGTCA-motif | 1644           | 1649          | cis-acting regulatory element involved in the MeJA-responsiveness    |
| <i>CsDof33</i> | TGACG-motif | 892            | 897           | cis-acting regulatory element involved in the MeJA-responsiveness    |
| <i>CsDof33</i> | TGACG-motif | 1644           | 1649          | cis-acting regulatory element involved in the MeJA-responsiveness    |
| <i>CsDof33</i> | O2-site     | 1867           | 1875          | cis-acting regulatory element involved in zein metabolism regulation |
| <i>CsDof33</i> | CAAT-box    | 78             | 83            | common cis-acting element in promoter and enhancer regions           |
| <i>CsDof33</i> | CAAT-box    | 91             | 96            | common cis-acting element in promoter and enhancer regions           |
| <i>CsDof33</i> | CAAT-box    | 129            | 134           | common cis-acting element in promoter and enhancer regions           |
| <i>CsDof33</i> | CAAT-box    | 140            | 145           | common cis-acting element in promoter and enhancer regions           |
| <i>CsDof33</i> | CAAT-box    | 253            | 258           | common cis-acting element in promoter and enhancer regions           |
| <i>CsDof33</i> | CAAT-box    | 284            | 289           | common cis-acting element in promoter and enhancer regions           |
| <i>CsDof33</i> | CAAT-box    | 513            | 518           | common cis-acting element in promoter and enhancer regions           |
| <i>CsDof33</i> | CAAT-box    | 597            | 602           | common cis-acting element in promoter and enhancer regions           |
| <i>CsDof33</i> | CAAT-box    | 606            | 611           | common cis-acting element in promoter and enhancer regions           |
| <i>CsDof33</i> | CAAT-box    | 658            | 663           | common cis-acting element in promoter and enhancer regions           |
| <i>CsDof33</i> | CAAT-box    | 731            | 736           | common cis-acting element in promoter and enhancer regions           |
| <i>CsDof33</i> | CAAT-box    | 764            | 769           | common cis-acting element in promoter and enhancer regions           |
| <i>CsDof33</i> | CAAT-box    | 1012           | 1017          | common cis-acting element in promoter and enhancer regions           |
| <i>CsDof33</i> | CAAT-box    | 1025           | 1030          | common cis-acting element in promoter and enhancer regions           |
| <i>CsDof33</i> | CAAT-box    | 1046           | 1051          | common cis-acting element in promoter and enhancer regions           |
| <i>CsDof33</i> | CAAT-box    | 1515           | 1520          | common cis-acting element in promoter and enhancer regions           |
| <i>CsDof33</i> | CAAT-box    | 1597           | 1602          | common cis-acting element in promoter and enhancer regions           |
| <i>CsDof33</i> | TATA-box    | 29             | 33            | core promoter element around -30 of transcription start              |
| <i>CsDof33</i> | TATA-box    | 52             | 60            | core promoter element around -30 of transcription start              |
| <i>CsDof33</i> | TATA-box    | 67             | 73            | core promoter element around -30 of transcription start              |
| <i>CsDof33</i> | TATA-box    | 69             | 73            | core promoter element around -30 of transcription start              |
| <i>CsDof33</i> | TATA-box    | 222            | 228           | core promoter element around -30 of transcription start              |
| <i>CsDof33</i> | TATA-box    | 223            | 227           | core promoter element around -30 of transcription start              |
| <i>CsDof33</i> | TATA-box    | 229            | 233           | core promoter element around -30 of transcription start              |
| <i>CsDof33</i> | TATA-box    | 267            | 271           | core promoter element around -30 of transcription start              |
| <i>CsDof33</i> | TATA-box    | 303            | 310           | core promoter element around -30 of transcription start              |
| <i>CsDof33</i> | TATA-box    | 304            | 310           | core promoter element around -30 of transcription start              |
| <i>CsDof33</i> | TATA-box    | 305            | 310           | core promoter element around -30 of transcription start              |
| <i>CsDof33</i> | TATA-box    | 306            | 310           | core promoter element around -30 of transcription start              |
| <i>CsDof33</i> | TATA-box    | 331            | 337           | core promoter element around -30 of transcription start              |
| <i>CsDof33</i> | TATA-box    | 332            | 336           | core promoter element around -30 of transcription start              |
| <i>CsDof33</i> | TATA-box    | 490            | 494           | core promoter element around -30 of transcription start              |
| <i>CsDof33</i> | TATA-box    | 535            | 539           | core promoter element around -30 of transcription start              |
| <i>CsDof33</i> | TATA-box    | 615            | 621           | core promoter element around -30 of transcription start              |
| <i>CsDof33</i> | TATA-box    | 616            | 621           | core promoter element around -30 of transcription start              |
| <i>CsDof33</i> | TATA-box    | 617            | 621           | core promoter element around -30 of transcription start              |
| <i>CsDof33</i> | TATA-box    | 677            | 683           | core promoter element around -30 of transcription start              |
| <i>CsDof33</i> | TATA-box    | 678            | 683           | core promoter element around -30 of transcription start              |
| <i>CsDof33</i> | TATA-box    | 679            | 683           | core promoter element around -30 of transcription start              |
| <i>CsDof33</i> | TATA-box    | 779            | 783           | core promoter element around -30 of transcription start              |
| <i>CsDof33</i> | TATA-box    | 784            | 790           | core promoter element around -30 of transcription start              |
| <i>CsDof33</i> | TATA-box    | 785            | 791           | core promoter element around -30 of transcription start              |

| Name           | Cis-element     | Start position | Stop position | Function                                                         |
|----------------|-----------------|----------------|---------------|------------------------------------------------------------------|
| <i>CsDof33</i> | TATA-box        | 787            | 791           | core promoter element around -30 of transcription start          |
| <i>CsDof33</i> | TATA-box        | 839            | 843           | core promoter element around -30 of transcription start          |
| <i>CsDof33</i> | TATA-box        | 869            | 878           | core promoter element around -30 of transcription start          |
| <i>CsDof33</i> | TATA-box        | 870            | 877           | core promoter element around -30 of transcription start          |
| <i>CsDof33</i> | TATA-box        | 871            | 877           | core promoter element around -30 of transcription start          |
| <i>CsDof33</i> | TATA-box        | 872            | 877           | core promoter element around -30 of transcription start          |
| <i>CsDof33</i> | TATA-box        | 873            | 877           | core promoter element around -30 of transcription start          |
| <i>CsDof33</i> | TATA-box        | 901            | 907           | core promoter element around -30 of transcription start          |
| <i>CsDof33</i> | TATA-box        | 902            | 907           | core promoter element around -30 of transcription start          |
| <i>CsDof33</i> | TATA-box        | 903            | 907           | core promoter element around -30 of transcription start          |
| <i>CsDof33</i> | TATA-box        | 1061           | 1068          | core promoter element around -30 of transcription start          |
| <i>CsDof33</i> | TATA-box        | 1062           | 1068          | core promoter element around -30 of transcription start          |
| <i>CsDof33</i> | TATA-box        | 1063           | 1070          | core promoter element around -30 of transcription start          |
| <i>CsDof33</i> | TATA-box        | 1064           | 1070          | core promoter element around -30 of transcription start          |
| <i>CsDof33</i> | TATA-box        | 1065           | 1071          | core promoter element around -30 of transcription start          |
| <i>CsDof33</i> | TATA-box        | 1066           | 1070          | core promoter element around -30 of transcription start          |
| <i>CsDof33</i> | TATA-box        | 1255           | 1259          | core promoter element around -30 of transcription start          |
| <i>CsDof33</i> | TATA-box        | 1286           | 1292          | core promoter element around -30 of transcription start          |
| <i>CsDof33</i> | TATA-box        | 1287           | 1292          | core promoter element around -30 of transcription start          |
| <i>CsDof33</i> | TATA-box        | 1288           | 1292          | core promoter element around -30 of transcription start          |
| <i>CsDof33</i> | TATA-box        | 1321           | 1327          | core promoter element around -30 of transcription start          |
| <i>CsDof33</i> | TATA-box        | 1322           | 1326          | core promoter element around -30 of transcription start          |
| <i>CsDof33</i> | TATA-box        | 1423           | 1427          | core promoter element around -30 of transcription start          |
| <i>CsDof33</i> | TATA-box        | 1446           | 1455          | core promoter element around -30 of transcription start          |
| <i>CsDof33</i> | TATA-box        | 1447           | 1452          | core promoter element around -30 of transcription start          |
| <i>CsDof33</i> | TATA-box        | 1448           | 1452          | core promoter element around -30 of transcription start          |
| <i>CsDof33</i> | TATA-box        | 1457           | 1463          | core promoter element around -30 of transcription start          |
| <i>CsDof33</i> | TATA-box        | 1459           | 1465          | core promoter element around -30 of transcription start          |
| <i>CsDof33</i> | TATA-box        | 1460           | 1466          | core promoter element around -30 of transcription start          |
| <i>CsDof33</i> | TATA-box        | 1461           | 1467          | core promoter element around -30 of transcription start          |
| <i>CsDof33</i> | TATA-box        | 1462           | 1468          | core promoter element around -30 of transcription start          |
| <i>CsDof33</i> | TATA-box        | 1463           | 1467          | core promoter element around -30 of transcription start          |
| <i>CsDof33</i> | TATA-box        | 1581           | 1585          | core promoter element around -30 of transcription start          |
| <i>CsDof33</i> | TATA-box        | 1587           | 1593          | core promoter element around -30 of transcription start          |
| <i>CsDof33</i> | TATA-box        | 1588           | 1592          | core promoter element around -30 of transcription start          |
| <i>CsDof33</i> | TATA-box        | 1611           | 1617          | core promoter element around -30 of transcription start          |
| <i>CsDof33</i> | TATA-box        | 1612           | 1616          | core promoter element around -30 of transcription start          |
| <i>CsDof33</i> | TATA-box        | 1932           | 1940          | core promoter element around -30 of transcription start          |
| <i>CsDof33</i> | TATA-box        | 1935           | 1940          | core promoter element around -30 of transcription start          |
| <i>CsDof33</i> | TATA-box        | 1936           | 1940          | core promoter element around -30 of transcription start          |
| <i>CsDof33</i> | TATA-box        | 1974           | 1983          | core promoter element around -30 of transcription start          |
| <i>CsDof33</i> | GT1-motif       | 1719           | 1725          | light responsive element                                         |
| <i>CsDof33</i> | MBS             | 576            | 582           | MYB binding site involved in drought-inducibility                |
| <i>CsDof33</i> | Box III         | 1525           | 1536          | protein binding site                                             |
| <i>CsDof34</i> | ABRE            | 443            | 448           | abscisic acid responsiveness                                     |
| <i>CsDof34</i> | ABRE            | 543            | 552           | abscisic acid responsiveness                                     |
| <i>CsDof34</i> | TGA-element     | 1030           | 1036          | auxin-responsive element                                         |
| <i>CsDof34</i> | AT-rich element | 1230           | 1240          | binding site of AT-rich DNA binding protein (ATBP-1)             |
| <i>CsDof34</i> | TC-rich repeats | 1399           | 1408          | cis-acting element involved in defense and stress responsiveness |
| <i>CsDof34</i> | TC-rich repeats | 1612           | 1621          | cis-acting element involved in defense and stress responsiveness |
| <i>CsDof34</i> | AuxRR-core      | 998            | 1005          | cis-acting regulatory element involved in auxin responsiveness   |

| Name           | Cis-element | Start position | Stop position | Function                                                       |
|----------------|-------------|----------------|---------------|----------------------------------------------------------------|
| <i>CsDof34</i> | G-box       | 442            | 448           | cis-acting regulatory element involved in light responsiveness |
| <i>CsDof34</i> | CAAT-box    | 130            | 135           | common cis-acting element in promoter and enhancer regions     |
| <i>CsDof34</i> | CAAT-box    | 292            | 297           | common cis-acting element in promoter and enhancer regions     |
| <i>CsDof34</i> | CAAT-box    | 366            | 371           | common cis-acting element in promoter and enhancer regions     |
| <i>CsDof34</i> | CAAT-box    | 400            | 405           | common cis-acting element in promoter and enhancer regions     |
| <i>CsDof34</i> | CAAT-box    | 521            | 526           | common cis-acting element in promoter and enhancer regions     |
| <i>CsDof34</i> | CAAT-box    | 722            | 727           | common cis-acting element in promoter and enhancer regions     |
| <i>CsDof34</i> | CAAT-box    | 801            | 806           | common cis-acting element in promoter and enhancer regions     |
| <i>CsDof34</i> | CAAT-box    | 1098           | 1103          | common cis-acting element in promoter and enhancer regions     |
| <i>CsDof34</i> | CAAT-box    | 1416           | 1421          | common cis-acting element in promoter and enhancer regions     |
| <i>CsDof34</i> | CAAT-box    | 1447           | 1452          | common cis-acting element in promoter and enhancer regions     |
| <i>CsDof34</i> | TATA-box    | 369            | 375           | core promoter element around -30 of transcription start        |
| <i>CsDof34</i> | TATA-box    | 370            | 375           | core promoter element around -30 of transcription start        |
| <i>CsDof34</i> | TATA-box    | 371            | 375           | core promoter element around -30 of transcription start        |
| <i>CsDof34</i> | TATA-box    | 487            | 491           | core promoter element around -30 of transcription start        |
| <i>CsDof34</i> | TATA-box    | 505            | 509           | core promoter element around -30 of transcription start        |
| <i>CsDof34</i> | TATA-box    | 555            | 559           | core promoter element around -30 of transcription start        |
| <i>CsDof34</i> | TATA-box    | 569            | 575           | core promoter element around -30 of transcription start        |
| <i>CsDof34</i> | TATA-box    | 570            | 574           | core promoter element around -30 of transcription start        |
| <i>CsDof34</i> | TATA-box    | 685            | 692           | core promoter element around -30 of transcription start        |
| <i>CsDof34</i> | TATA-box    | 739            | 746           | core promoter element around -30 of transcription start        |
| <i>CsDof34</i> | TATA-box    | 776            | 782           | core promoter element around -30 of transcription start        |
| <i>CsDof34</i> | TATA-box    | 777            | 781           | core promoter element around -30 of transcription start        |
| <i>CsDof34</i> | TATA-box    | 787            | 791           | core promoter element around -30 of transcription start        |
| <i>CsDof34</i> | TATA-box    | 848            | 855           | core promoter element around -30 of transcription start        |
| <i>CsDof34</i> | TATA-box    | 1117           | 1123          | core promoter element around -30 of transcription start        |
| <i>CsDof34</i> | TATA-box    | 1118           | 1123          | core promoter element around -30 of transcription start        |
| <i>CsDof34</i> | TATA-box    | 1119           | 1123          | core promoter element around -30 of transcription start        |
| <i>CsDof34</i> | TATA-box    | 1137           | 1143          | core promoter element around -30 of transcription start        |
| <i>CsDof34</i> | TATA-box    | 1138           | 1143          | core promoter element around -30 of transcription start        |
| <i>CsDof34</i> | TATA-box    | 1139           | 1143          | core promoter element around -30 of transcription start        |
| <i>CsDof34</i> | TATA-box    | 1205           | 1211          | core promoter element around -30 of transcription start        |
| <i>CsDof34</i> | TATA-box    | 1206           | 1210          | core promoter element around -30 of transcription start        |
| <i>CsDof34</i> | TATA-box    | 1209           | 1215          | core promoter element around -30 of transcription start        |
| <i>CsDof34</i> | TATA-box    | 1210           | 1215          | core promoter element around -30 of transcription start        |
| <i>CsDof34</i> | TATA-box    | 1211           | 1215          | core promoter element around -30 of transcription start        |
| <i>CsDof34</i> | TATA-box    | 1242           | 1248          | core promoter element around -30 of transcription start        |
| <i>CsDof34</i> | TATA-box    | 1243           | 1249          | core promoter element around -30 of transcription start        |
| <i>CsDof34</i> | TATA-box    | 1244           | 1248          | core promoter element around -30 of transcription start        |
| <i>CsDof34</i> | TATA-box    | 1486           | 1492          | core promoter element around -30 of transcription start        |
| <i>CsDof34</i> | TATA-box    | 1487           | 1491          | core promoter element around -30 of transcription start        |
| <i>CsDof34</i> | TATA-box    | 1554           | 1558          | core promoter element around -30 of transcription start        |
| <i>CsDof34</i> | TATA-box    | 1563           | 1569          | core promoter element around -30 of transcription start        |
| <i>CsDof34</i> | TATA-box    | 1564           | 1570          | core promoter element around -30 of transcription start        |
| <i>CsDof34</i> | TATA-box    | 1565           | 1571          | core promoter element around -30 of transcription start        |
| <i>CsDof34</i> | TATA-box    | 1566           | 1570          | core promoter element around -30 of transcription start        |
| <i>CsDof34</i> | TATA-box    | 1675           | 1681          | core promoter element around -30 of transcription start        |
| <i>CsDof34</i> | TATA-box    | 1676           | 1680          | core promoter element around -30 of transcription start        |
| <i>CsDof34</i> | TATA-box    | 1714           | 1720          | core promoter element around -30 of transcription start        |
| <i>CsDof34</i> | TATA-box    | 1715           | 1722          | core promoter element around -30 of transcription start        |
| <i>CsDof34</i> | TATA-box    | 1716           | 1722          | core promoter element around -30 of transcription start        |

| Name           | Cis-element     | Start position | Stop position | Function                                                            |
|----------------|-----------------|----------------|---------------|---------------------------------------------------------------------|
| <i>CsDof34</i> | TATA-box        | 1717           | 1723          | core promoter element around -30 of transcription start             |
| <i>CsDof34</i> | TATA-box        | 1718           | 1724          | core promoter element around -30 of transcription start             |
| <i>CsDof34</i> | TATA-box        | 1719           | 1725          | core promoter element around -30 of transcription start             |
| <i>CsDof34</i> | TATA-box        | 1720           | 1726          | core promoter element around -30 of transcription start             |
| <i>CsDof34</i> | TATA-box        | 1721           | 1727          | core promoter element around -30 of transcription start             |
| <i>CsDof34</i> | TATA-box        | 1722           | 1728          | core promoter element around -30 of transcription start             |
| <i>CsDof34</i> | TATA-box        | 1723           | 1729          | core promoter element around -30 of transcription start             |
| <i>CsDof34</i> | TATA-box        | 1724           | 1730          | core promoter element around -30 of transcription start             |
| <i>CsDof34</i> | TATA-box        | 1725           | 1731          | core promoter element around -30 of transcription start             |
| <i>CsDof34</i> | TATA-box        | 1726           | 1732          | core promoter element around -30 of transcription start             |
| <i>CsDof34</i> | TATA-box        | 1727           | 1733          | core promoter element around -30 of transcription start             |
| <i>CsDof34</i> | TATA-box        | 1728           | 1734          | core promoter element around -30 of transcription start             |
| <i>CsDof34</i> | TATA-box        | 1729           | 1735          | core promoter element around -30 of transcription start             |
| <i>CsDof34</i> | TATA-box        | 1730           | 1736          | core promoter element around -30 of transcription start             |
| <i>CsDof34</i> | TATA-box        | 1731           | 1737          | core promoter element around -30 of transcription start             |
| <i>CsDof34</i> | TATA-box        | 1732           | 1738          | core promoter element around -30 of transcription start             |
| <i>CsDof34</i> | TATA-box        | 1733           | 1739          | core promoter element around -30 of transcription start             |
| <i>CsDof34</i> | TATA-box        | 1734           | 1738          | core promoter element around -30 of transcription start             |
| <i>CsDof34</i> | TATA-box        | 1746           | 1755          | core promoter element around -30 of transcription start             |
| <i>CsDof34</i> | TATA-box        | 1747           | 1753          | core promoter element around -30 of transcription start             |
| <i>CsDof34</i> | TATA-box        | 1748           | 1754          | core promoter element around -30 of transcription start             |
| <i>CsDof34</i> | TATA-box        | 1749           | 1755          | core promoter element around -30 of transcription start             |
| <i>CsDof34</i> | TATA-box        | 1750           | 1756          | core promoter element around -30 of transcription start             |
| <i>CsDof34</i> | TATA-box        | 1751           | 1757          | core promoter element around -30 of transcription start             |
| <i>CsDof34</i> | TATA-box        | 1752           | 1756          | core promoter element around -30 of transcription start             |
| <i>CsDof34</i> | GT1-motif       | 1049           | 1055          | light responsive element                                            |
| <i>CsDof34</i> | GT1-motif       | 1343           | 1349          | light responsive element                                            |
| <i>CsDof34</i> | WUN-motif       | 1588           | 1597          | wound-responsive element                                            |
| <i>CsDof35</i> | ABRE            | 131            | 137           | abscisic acid responsiveness                                        |
| <i>CsDof35</i> | ABRE            | 132            | 137           | abscisic acid responsiveness                                        |
| <i>CsDof35</i> | ABRE            | 615            | 620           | abscisic acid responsiveness                                        |
| <i>CsDof35</i> | ABRE            | 642            | 648           | abscisic acid responsiveness                                        |
| <i>CsDof35</i> | ABRE            | 643            | 648           | abscisic acid responsiveness                                        |
| <i>CsDof35</i> | TGA-element     | 148            | 154           | auxin-responsive element                                            |
| <i>CsDof35</i> | TGA-element     | 198            | 204           | auxin-responsive element                                            |
| <i>CsDof35</i> | TC-rich repeats | 229            | 238           | cis-acting element involved in defense and stress responsiveness    |
| <i>CsDof35</i> | ARE             | 746            | 752           | cis-acting regulatory element essential for the anaerobic induction |
| <i>CsDof35</i> | ARE             | 1460           | 1466          | cis-acting regulatory element essential for the anaerobic induction |
| <i>CsDof35</i> | G-box           | 131            | 137           | cis-acting regulatory element involved in light responsiveness      |
| <i>CsDof35</i> | G-box           | 642            | 648           | cis-acting regulatory element involved in light responsiveness      |
| <i>CsDof35</i> | G-box           | 713            | 719           | cis-acting regulatory element involved in light responsiveness      |
| <i>CsDof35</i> | G-Box           | 131            | 137           | cis-acting regulatory element involved in light responsiveness      |
| <i>CsDof35</i> | G-Box           | 615            | 621           | cis-acting regulatory element involved in light responsiveness      |
| <i>CsDof35</i> | G-Box           | 642            | 648           | cis-acting regulatory element involved in light responsiveness      |
| <i>CsDof35</i> | CAAT-box        | 50             | 55            | common cis-acting element in promoter and enhancer regions          |
| <i>CsDof35</i> | CAAT-box        | 118            | 123           | common cis-acting element in promoter and enhancer regions          |
| <i>CsDof35</i> | CAAT-box        | 224            | 229           | common cis-acting element in promoter and enhancer regions          |
| <i>CsDof35</i> | CAAT-box        | 484            | 489           | common cis-acting element in promoter and enhancer regions          |
| <i>CsDof35</i> | CAAT-box        | 512            | 517           | common cis-acting element in promoter and enhancer regions          |
| <i>CsDof35</i> | CAAT-box        | 758            | 763           | common cis-acting element in promoter and enhancer regions          |
| <i>CsDof35</i> | CAAT-box        | 939            | 944           | common cis-acting element in promoter and enhancer regions          |

| Name           | Cis-element | Start position | Stop position | Function                                                   |
|----------------|-------------|----------------|---------------|------------------------------------------------------------|
| <i>CsDof35</i> | CAAT-box    | 1011           | 1016          | common cis-acting element in promoter and enhancer regions |
| <i>CsDof35</i> | CAAT-box    | 1484           | 1489          | common cis-acting element in promoter and enhancer regions |
| <i>CsDof35</i> | CAAT-box    | 1515           | 1520          | common cis-acting element in promoter and enhancer regions |
| <i>CsDof35</i> | CAAT-box    | 1609           | 1614          | common cis-acting element in promoter and enhancer regions |
| <i>CsDof35</i> | CAAT-box    | 1612           | 1617          | common cis-acting element in promoter and enhancer regions |
| <i>CsDof35</i> | TATA-box    | 33             | 39            | core promoter element around -30 of transcription start    |
| <i>CsDof35</i> | TATA-box    | 34             | 39            | core promoter element around -30 of transcription start    |
| <i>CsDof35</i> | TATA-box    | 35             | 39            | core promoter element around -30 of transcription start    |
| <i>CsDof35</i> | TATA-box    | 69             | 75            | core promoter element around -30 of transcription start    |
| <i>CsDof35</i> | TATA-box    | 70             | 74            | core promoter element around -30 of transcription start    |
| <i>CsDof35</i> | TATA-box    | 382            | 388           | core promoter element around -30 of transcription start    |
| <i>CsDof35</i> | TATA-box    | 384            | 388           | core promoter element around -30 of transcription start    |
| <i>CsDof35</i> | TATA-box    | 386            | 394           | core promoter element around -30 of transcription start    |
| <i>CsDof35</i> | TATA-box    | 465            | 470           | core promoter element around -30 of transcription start    |
| <i>CsDof35</i> | TATA-box    | 466            | 470           | core promoter element around -30 of transcription start    |
| <i>CsDof35</i> | TATA-box    | 469            | 475           | core promoter element around -30 of transcription start    |
| <i>CsDof35</i> | TATA-box    | 470            | 475           | core promoter element around -30 of transcription start    |
| <i>CsDof35</i> | TATA-box    | 471            | 475           | core promoter element around -30 of transcription start    |
| <i>CsDof35</i> | TATA-box    | 674            | 681           | core promoter element around -30 of transcription start    |
| <i>CsDof35</i> | TATA-box    | 675            | 681           | core promoter element around -30 of transcription start    |
| <i>CsDof35</i> | TATA-box    | 676            | 681           | core promoter element around -30 of transcription start    |
| <i>CsDof35</i> | TATA-box    | 677            | 681           | core promoter element around -30 of transcription start    |
| <i>CsDof35</i> | TATA-box    | 692            | 698           | core promoter element around -30 of transcription start    |
| <i>CsDof35</i> | TATA-box    | 693            | 699           | core promoter element around -30 of transcription start    |
| <i>CsDof35</i> | TATA-box    | 694            | 700           | core promoter element around -30 of transcription start    |
| <i>CsDof35</i> | TATA-box    | 695            | 701           | core promoter element around -30 of transcription start    |
| <i>CsDof35</i> | TATA-box    | 696            | 702           | core promoter element around -30 of transcription start    |
| <i>CsDof35</i> | TATA-box    | 697            | 703           | core promoter element around -30 of transcription start    |
| <i>CsDof35</i> | TATA-box    | 698            | 702           | core promoter element around -30 of transcription start    |
| <i>CsDof35</i> | TATA-box    | 707            | 713           | core promoter element around -30 of transcription start    |
| <i>CsDof35</i> | TATA-box    | 708            | 712           | core promoter element around -30 of transcription start    |
| <i>CsDof35</i> | TATA-box    | 750            | 758           | core promoter element around -30 of transcription start    |
| <i>CsDof35</i> | TATA-box    | 753            | 758           | core promoter element around -30 of transcription start    |
| <i>CsDof35</i> | TATA-box    | 754            | 758           | core promoter element around -30 of transcription start    |
| <i>CsDof35</i> | TATA-box    | 896            | 902           | core promoter element around -30 of transcription start    |
| <i>CsDof35</i> | TATA-box    | 898            | 902           | core promoter element around -30 of transcription start    |
| <i>CsDof35</i> | TATA-box    | 1056           | 1062          | core promoter element around -30 of transcription start    |
| <i>CsDof35</i> | TATA-box    | 1057           | 1061          | core promoter element around -30 of transcription start    |
| <i>CsDof35</i> | TATA-box    | 1066           | 1075          | core promoter element around -30 of transcription start    |
| <i>CsDof35</i> | TATA-box    | 1067           | 1073          | core promoter element around -30 of transcription start    |
| <i>CsDof35</i> | TATA-box    | 1068           | 1075          | core promoter element around -30 of transcription start    |
| <i>CsDof35</i> | TATA-box    | 1069           | 1075          | core promoter element around -30 of transcription start    |
| <i>CsDof35</i> | TATA-box    | 1070           | 1076          | core promoter element around -30 of transcription start    |
| <i>CsDof35</i> | TATA-box    | 1071           | 1075          | core promoter element around -30 of transcription start    |
| <i>CsDof35</i> | TATA-box    | 1206           | 1210          | core promoter element around -30 of transcription start    |
| <i>CsDof35</i> | TATA-box    | 1257           | 1263          | core promoter element around -30 of transcription start    |
| <i>CsDof35</i> | TATA-box    | 1258           | 1264          | core promoter element around -30 of transcription start    |
| <i>CsDof35</i> | TATA-box    | 1259           | 1265          | core promoter element around -30 of transcription start    |
| <i>CsDof35</i> | TATA-box    | 1260           | 1264          | core promoter element around -30 of transcription start    |
| <i>CsDof35</i> | TATA-box    | 1284           | 1290          | core promoter element around -30 of transcription start    |
| <i>CsDof35</i> | TATA-box    | 1285           | 1289          | core promoter element around -30 of transcription start    |

| Name           | Cis-element | Start position | Stop position | Function                                                            |
|----------------|-------------|----------------|---------------|---------------------------------------------------------------------|
| <i>CsDof35</i> | TATA-box    | 1297           | 1304          | core promoter element around -30 of transcription start             |
| <i>CsDof35</i> | TATA-box    | 1321           | 1325          | core promoter element around -30 of transcription start             |
| <i>CsDof35</i> | TATA-box    | 1346           | 1353          | core promoter element around -30 of transcription start             |
| <i>CsDof35</i> | TATA-box    | 1395           | 1399          | core promoter element around -30 of transcription start             |
| <i>CsDof35</i> | TATA-box    | 1405           | 1411          | core promoter element around -30 of transcription start             |
| <i>CsDof35</i> | TATA-box    | 1407           | 1411          | core promoter element around -30 of transcription start             |
| <i>CsDof35</i> | TATA-box    | 1420           | 1428          | core promoter element around -30 of transcription start             |
| <i>CsDof35</i> | TATA-box    | 1544           | 1548          | core promoter element around -30 of transcription start             |
| <i>CsDof35</i> | TATA-box    | 1566           | 1570          | core promoter element around -30 of transcription start             |
| <i>CsDof35</i> | TATA-box    | 1592           | 1598          | core promoter element around -30 of transcription start             |
| <i>CsDof35</i> | TATA-box    | 1593           | 1600          | core promoter element around -30 of transcription start             |
| <i>CsDof35</i> | TATA-box    | 1594           | 1600          | core promoter element around -30 of transcription start             |
| <i>CsDof35</i> | TATA-box    | 1595           | 1601          | core promoter element around -30 of transcription start             |
| <i>CsDof35</i> | TATA-box    | 1596           | 1600          | core promoter element around -30 of transcription start             |
| <i>CsDof35</i> | TATA-box    | 1657           | 1666          | core promoter element around -30 of transcription start             |
| <i>CsDof35</i> | TATA-box    | 1667           | 1671          | core promoter element around -30 of transcription start             |
| <i>CsDof35</i> | TATA-box    | 1672           | 1676          | core promoter element around -30 of transcription start             |
| <i>CsDof35</i> | TATA-box    | 1778           | 1784          | core promoter element around -30 of transcription start             |
| <i>CsDof35</i> | TATA-box    | 1779           | 1784          | core promoter element around -30 of transcription start             |
| <i>CsDof35</i> | TATA-box    | 1780           | 1784          | core promoter element around -30 of transcription start             |
| <i>CsDof35</i> | P-box       | 1750           | 1757          | gibberellin-responsive element                                      |
| <i>CsDof35</i> | Sp1         | 1309           | 1315          | light responsive element                                            |
| <i>CsDof35</i> | GT1-motif   | 42             | 48            | light responsive element                                            |
| <i>CsDof35</i> | MBS         | 240            | 246           | MYB binding site involved in drought-inducibility                   |
| <i>CsDof35</i> | MRE         | 1180           | 1187          | MYB binding site involved in light responsiveness                   |
| <i>CsDof35</i> | CCAAT-box   | 96             | 102           | MYBHv1 binding site                                                 |
| <i>CsDof35</i> | CCAAT-box   | 555            | 561           | MYBHv1 binding site                                                 |
| <i>CsDof35</i> | HD-Zip 3    | 1553           | 1563          | protein binding site                                                |
| <i>CsDof36</i> | ABRE        | 1473           | 1478          | abscisic acid responsiveness                                        |
| <i>CsDof36</i> | ABRE        | 1582           | 1587          | abscisic acid responsiveness                                        |
| <i>CsDof36</i> | ABRE        | 1746           | 1751          | abscisic acid responsiveness                                        |
| <i>CsDof36</i> | MSA-like    | 600            | 609           | cis-acting element involved in cell cycle regulation                |
| <i>CsDof36</i> | ARE         | 282            | 288           | cis-acting regulatory element essential for the anaerobic induction |
| <i>CsDof36</i> | ARE         | 1631           | 1637          | cis-acting regulatory element essential for the anaerobic induction |
| <i>CsDof36</i> | G-Box       | 1473           | 1479          | cis-acting regulatory element involved in light responsiveness      |
| <i>CsDof36</i> | G-Box       | 1581           | 1587          | cis-acting regulatory element involved in light responsiveness      |
| <i>CsDof36</i> | G-box       | 1745           | 1751          | cis-acting regulatory element involved in light responsiveness      |
| <i>CsDof36</i> | TGACG-motif | 473            | 478           | cis-acting regulatory element involved in the MeJA-responsiveness   |
| <i>CsDof36</i> | CGTCA-motif | 473            | 478           | cis-acting regulatory element involved in the MeJA-responsiveness   |
| <i>CsDof36</i> | CAAT-box    | 90             | 95            | common cis-acting element in promoter and enhancer regions          |
| <i>CsDof36</i> | CAAT-box    | 174            | 179           | common cis-acting element in promoter and enhancer regions          |
| <i>CsDof36</i> | CAAT-box    | 686            | 691           | common cis-acting element in promoter and enhancer regions          |
| <i>CsDof36</i> | CAAT-box    | 753            | 758           | common cis-acting element in promoter and enhancer regions          |
| <i>CsDof36</i> | CAAT-box    | 854            | 859           | common cis-acting element in promoter and enhancer regions          |
| <i>CsDof36</i> | CAAT-box    | 1211           | 1216          | common cis-acting element in promoter and enhancer regions          |
| <i>CsDof36</i> | CAAT-box    | 1398           | 1403          | common cis-acting element in promoter and enhancer regions          |
| <i>CsDof36</i> | CAAT-box    | 1443           | 1448          | common cis-acting element in promoter and enhancer regions          |
| <i>CsDof36</i> | CAAT-box    | 1658           | 1663          | common cis-acting element in promoter and enhancer regions          |
| <i>CsDof36</i> | CAAT-box    | 1686           | 1691          | common cis-acting element in promoter and enhancer regions          |
| <i>CsDof36</i> | CAAT-box    | 1711           | 1716          | common cis-acting element in promoter and enhancer regions          |
| <i>CsDof36</i> | TATA-box    | 110            | 116           | core promoter element around -30 of transcription start             |



| Name           | Cis-element | Start position | Stop position | Function                                                |
|----------------|-------------|----------------|---------------|---------------------------------------------------------|
| <i>CsDof36</i> | TATA-box    | 111            | 117           | core promoter element around -30 of transcription start |
| <i>CsDof36</i> | TATA-box    | 112            | 118           | core promoter element around -30 of transcription start |
| <i>CsDof36</i> | TATA-box    | 113            | 119           | core promoter element around -30 of transcription start |
| <i>CsDof36</i> | TATA-box    | 114            | 118           | core promoter element around -30 of transcription start |
| <i>CsDof36</i> | TATA-box    | 212            | 217           | core promoter element around -30 of transcription start |
| <i>CsDof36</i> | TATA-box    | 213            | 217           | core promoter element around -30 of transcription start |
| <i>CsDof36</i> | TATA-box    | 269            | 275           | core promoter element around -30 of transcription start |
| <i>CsDof36</i> | TATA-box    | 271            | 275           | core promoter element around -30 of transcription start |
| <i>CsDof36</i> | TATA-box    | 325            | 329           | core promoter element around -30 of transcription start |
| <i>CsDof36</i> | TATA-box    | 560            | 567           | core promoter element around -30 of transcription start |
| <i>CsDof36</i> | TATA-box    | 615            | 621           | core promoter element around -30 of transcription start |
| <i>CsDof36</i> | TATA-box    | 616            | 621           | core promoter element around -30 of transcription start |
| <i>CsDof36</i> | TATA-box    | 617            | 621           | core promoter element around -30 of transcription start |
| <i>CsDof36</i> | TATA-box    | 640            | 646           | core promoter element around -30 of transcription start |
| <i>CsDof36</i> | TATA-box    | 642            | 646           | core promoter element around -30 of transcription start |
| <i>CsDof36</i> | TATA-box    | 649            | 653           | core promoter element around -30 of transcription start |
| <i>CsDof36</i> | TATA-box    | 778            | 782           | core promoter element around -30 of transcription start |
| <i>CsDof36</i> | TATA-box    | 857            | 863           | core promoter element around -30 of transcription start |
| <i>CsDof36</i> | TATA-box    | 858            | 862           | core promoter element around -30 of transcription start |
| <i>CsDof36</i> | TATA-box    | 873            | 877           | core promoter element around -30 of transcription start |
| <i>CsDof36</i> | TATA-box    | 917            | 923           | core promoter element around -30 of transcription start |
| <i>CsDof36</i> | TATA-box    | 918            | 922           | core promoter element around -30 of transcription start |
| <i>CsDof36</i> | TATA-box    | 954            | 960           | core promoter element around -30 of transcription start |
| <i>CsDof36</i> | TATA-box    | 955            | 961           | core promoter element around -30 of transcription start |
| <i>CsDof36</i> | TATA-box    | 956            | 962           | core promoter element around -30 of transcription start |
| <i>CsDof36</i> | TATA-box    | 957            | 961           | core promoter element around -30 of transcription start |
| <i>CsDof36</i> | TATA-box    | 1032           | 1036          | core promoter element around -30 of transcription start |
| <i>CsDof36</i> | TATA-box    | 1077           | 1083          | core promoter element around -30 of transcription start |
| <i>CsDof36</i> | TATA-box    | 1078           | 1084          | core promoter element around -30 of transcription start |
| <i>CsDof36</i> | TATA-box    | 1079           | 1085          | core promoter element around -30 of transcription start |
| <i>CsDof36</i> | TATA-box    | 1080           | 1084          | core promoter element around -30 of transcription start |
| <i>CsDof36</i> | TATA-box    | 1265           | 1271          | core promoter element around -30 of transcription start |
| <i>CsDof36</i> | TATA-box    | 1266           | 1271          | core promoter element around -30 of transcription start |
| <i>CsDof36</i> | TATA-box    | 1267           | 1271          | core promoter element around -30 of transcription start |
| <i>CsDof36</i> | TATA-box    | 1291           | 1297          | core promoter element around -30 of transcription start |
| <i>CsDof36</i> | TATA-box    | 1292           | 1296          | core promoter element around -30 of transcription start |
| <i>CsDof36</i> | TATA-box    | 1306           | 1312          | core promoter element around -30 of transcription start |
| <i>CsDof36</i> | TATA-box    | 1307           | 1311          | core promoter element around -30 of transcription start |
| <i>CsDof36</i> | TATA-box    | 1337           | 1341          | core promoter element around -30 of transcription start |
| <i>CsDof36</i> | TATA-box    | 1429           | 1433          | core promoter element around -30 of transcription start |
| <i>CsDof36</i> | TATA-box    | 1549           | 1558          | core promoter element around -30 of transcription start |
| <i>CsDof36</i> | TATA-box    | 1607           | 1611          | core promoter element around -30 of transcription start |
| <i>CsDof36</i> | TATA-box    | 1810           | 1814          | core promoter element around -30 of transcription start |
| <i>CsDof36</i> | TATA-box    | 1909           | 1914          | core promoter element around -30 of transcription start |
| <i>CsDof36</i> | TATA-box    | 1910           | 1914          | core promoter element around -30 of transcription start |
| <i>CsDof36</i> | TATA-box    | 1924           | 1933          | core promoter element around -30 of transcription start |
| <i>CsDof36</i> | TATA-box    | 1926           | 1930          | core promoter element around -30 of transcription start |
| <i>CsDof36</i> | P-box       | 1273           | 1280          | gibberellin-responsive element                          |
| <i>CsDof36</i> | MBS         | 573            | 579           | MYB binding site involved in drought-inducibility       |
| <i>CsDof36</i> | MRE         | 1136           | 1143          | MYB binding site involved in light responsiveness       |
| <i>CsDof36</i> | CCAAT-box   | 602            | 608           | MYBHv1 binding site                                     |

| Name           | Cis-element     | Start position | Stop position | Function                                                            |
|----------------|-----------------|----------------|---------------|---------------------------------------------------------------------|
| <i>CsDof37</i> | TGA-element     | 593            | 599           | auxin-responsive element                                            |
| <i>CsDof37</i> | TC-rich repeats | 1792           | 1801          | cis-acting element involved in defense and stress responsiveness    |
| <i>CsDof37</i> | TCA-element     | 96             | 105           | cis-acting element involved in salicylic acid responsiveness        |
| <i>CsDof37</i> | TCA-element     | 1277           | 1286          | cis-acting element involved in salicylic acid responsiveness        |
| <i>CsDof37</i> | ARE             | 407            | 413           | cis-acting regulatory element essential for the anaerobic induction |
| <i>CsDof37</i> | ARE             | 1359           | 1365          | cis-acting regulatory element essential for the anaerobic induction |
| <i>CsDof37</i> | ARE             | 1844           | 1850          | cis-acting regulatory element essential for the anaerobic induction |
| <i>CsDof37</i> | circadian       | 635            | 644           | cis-acting regulatory element involved in circadian control         |
| <i>CsDof37</i> | TGACG-motif     | 270            | 275           | cis-acting regulatory element involved in the MeJA-responsiveness   |
| <i>CsDof37</i> | CGTCA-motif     | 270            | 275           | cis-acting regulatory element involved in the MeJA-responsiveness   |
| <i>CsDof37</i> | CAAT-box        | 6              | 11            | common cis-acting element in promoter and enhancer regions          |
| <i>CsDof37</i> | CAAT-box        | 280            | 285           | common cis-acting element in promoter and enhancer regions          |
| <i>CsDof37</i> | CAAT-box        | 351            | 356           | common cis-acting element in promoter and enhancer regions          |
| <i>CsDof37</i> | CAAT-box        | 384            | 389           | common cis-acting element in promoter and enhancer regions          |
| <i>CsDof37</i> | CAAT-box        | 437            | 442           | common cis-acting element in promoter and enhancer regions          |
| <i>CsDof37</i> | CAAT-box        | 788            | 793           | common cis-acting element in promoter and enhancer regions          |
| <i>CsDof37</i> | CAAT-box        | 903            | 908           | common cis-acting element in promoter and enhancer regions          |
| <i>CsDof37</i> | CAAT-box        | 923            | 928           | common cis-acting element in promoter and enhancer regions          |
| <i>CsDof37</i> | CAAT-box        | 1098           | 1103          | common cis-acting element in promoter and enhancer regions          |
| <i>CsDof37</i> | CAAT-box        | 1459           | 1464          | common cis-acting element in promoter and enhancer regions          |
| <i>CsDof37</i> | CAAT-box        | 1685           | 1690          | common cis-acting element in promoter and enhancer regions          |
| <i>CsDof37</i> | TATA-box        | 41             | 47            | core promoter element around -30 of transcription start             |
| <i>CsDof37</i> | TATA-box        | 42             | 47            | core promoter element around -30 of transcription start             |
| <i>CsDof37</i> | TATA-box        | 43             | 47            | core promoter element around -30 of transcription start             |
| <i>CsDof37</i> | TATA-box        | 198            | 204           | core promoter element around -30 of transcription start             |
| <i>CsDof37</i> | TATA-box        | 199            | 206           | core promoter element around -30 of transcription start             |
| <i>CsDof37</i> | TATA-box        | 200            | 206           | core promoter element around -30 of transcription start             |
| <i>CsDof37</i> | TATA-box        | 201            | 207           | core promoter element around -30 of transcription start             |
| <i>CsDof37</i> | TATA-box        | 202            | 206           | core promoter element around -30 of transcription start             |
| <i>CsDof37</i> | TATA-box        | 290            | 297           | core promoter element around -30 of transcription start             |
| <i>CsDof37</i> | TATA-box        | 442            | 449           | core promoter element around -30 of transcription start             |
| <i>CsDof37</i> | TATA-box        | 443            | 449           | core promoter element around -30 of transcription start             |
| <i>CsDof37</i> | TATA-box        | 445            | 449           | core promoter element around -30 of transcription start             |
| <i>CsDof37</i> | TATA-box        | 450            | 455           | core promoter element around -30 of transcription start             |
| <i>CsDof37</i> | TATA-box        | 451            | 455           | core promoter element around -30 of transcription start             |
| <i>CsDof37</i> | TATA-box        | 472            | 478           | core promoter element around -30 of transcription start             |
| <i>CsDof37</i> | TATA-box        | 474            | 478           | core promoter element around -30 of transcription start             |
| <i>CsDof37</i> | TATA-box        | 501            | 507           | core promoter element around -30 of transcription start             |
| <i>CsDof37</i> | TATA-box        | 502            | 506           | core promoter element around -30 of transcription start             |
| <i>CsDof37</i> | TATA-box        | 672            | 676           | core promoter element around -30 of transcription start             |
| <i>CsDof37</i> | TATA-box        | 729            | 735           | core promoter element around -30 of transcription start             |
| <i>CsDof37</i> | TATA-box        | 730            | 735           | core promoter element around -30 of transcription start             |
| <i>CsDof37</i> | TATA-box        | 731            | 735           | core promoter element around -30 of transcription start             |
| <i>CsDof37</i> | TATA-box        | 751            | 757           | core promoter element around -30 of transcription start             |
| <i>CsDof37</i> | TATA-box        | 752            | 757           | core promoter element around -30 of transcription start             |
| <i>CsDof37</i> | TATA-box        | 753            | 757           | core promoter element around -30 of transcription start             |
| <i>CsDof37</i> | TATA-box        | 939            | 943           | core promoter element around -30 of transcription start             |
| <i>CsDof37</i> | TATA-box        | 946            | 951           | core promoter element around -30 of transcription start             |
| <i>CsDof37</i> | TATA-box        | 947            | 951           | core promoter element around -30 of transcription start             |
| <i>CsDof37</i> | TATA-box        | 1010           | 1015          | core promoter element around -30 of transcription start             |
| <i>CsDof37</i> | TATA-box        | 1011           | 1015          | core promoter element around -30 of transcription start             |



| Name           | Cis-element      | Start position | Stop position | Function                                                            |
|----------------|------------------|----------------|---------------|---------------------------------------------------------------------|
| <i>CsDof37</i> | AT-rich sequence | 1429           | 1438          | element for maximal elicitor-mediated activation (2copies)          |
| <i>CsDof37</i> | P-box            | 1839           | 1846          | gibberellin-responsive element                                      |
| <i>CsDof37</i> | GT1-motif        | 712            | 718           | light responsive element                                            |
| <i>CsDof37</i> | GT1-motif        | 829            | 836           | light responsive element                                            |
| <i>CsDof37</i> | GT1-motif        | 830            | 836           | light responsive element                                            |
| <i>CsDof38</i> | ARE              | 1937           | 1943          | cis-acting regulatory element essential for the anaerobic induction |
| <i>CsDof38</i> | CAAT-box         | 1587           | 1592          | common cis-acting element in promoter and enhancer regions          |
| <i>CsDof38</i> | CAAT-box         | 1748           | 1753          | common cis-acting element in promoter and enhancer regions          |
| <i>CsDof38</i> | CAAT-box         | 1921           | 1926          | common cis-acting element in promoter and enhancer regions          |
| <i>CsDof38</i> | TATA-box         | 1283           | 1287          | core promoter element around -30 of transcription start             |
| <i>CsDof38</i> | TATA-box         | 1299           | 1305          | core promoter element around -30 of transcription start             |
| <i>CsDof38</i> | TATA-box         | 1301           | 1305          | core promoter element around -30 of transcription start             |
| <i>CsDof38</i> | TATA-box         | 1308           | 1314          | core promoter element around -30 of transcription start             |
| <i>CsDof38</i> | TATA-box         | 1309           | 1314          | core promoter element around -30 of transcription start             |
| <i>CsDof38</i> | TATA-box         | 1310           | 1314          | core promoter element around -30 of transcription start             |
| <i>CsDof38</i> | TATA-box         | 1324           | 1330          | core promoter element around -30 of transcription start             |
| <i>CsDof38</i> | TATA-box         | 1325           | 1330          | core promoter element around -30 of transcription start             |
| <i>CsDof38</i> | TATA-box         | 1326           | 1330          | core promoter element around -30 of transcription start             |
| <i>CsDof38</i> | TATA-box         | 1733           | 1741          | core promoter element around -30 of transcription start             |
| <i>CsDof38</i> | TATA-box         | 1738           | 1744          | core promoter element around -30 of transcription start             |
| <i>CsDof38</i> | TATA-box         | 1739           | 1743          | core promoter element around -30 of transcription start             |
| <i>CsDof38</i> | TATA-box         | 1822           | 1828          | core promoter element around -30 of transcription start             |
| <i>CsDof38</i> | TATA-box         | 1823           | 1829          | core promoter element around -30 of transcription start             |
| <i>CsDof38</i> | TATA-box         | 1824           | 1830          | core promoter element around -30 of transcription start             |
| <i>CsDof38</i> | TATA-box         | 1825           | 1829          | core promoter element around -30 of transcription start             |
| <i>CsDof38</i> | TATA-box         | 1839           | 1846          | core promoter element around -30 of transcription start             |
| <i>CsDof38</i> | TATA-box         | 1975           | 1984          | core promoter element around -30 of transcription start             |
| <i>CsDof38</i> | TATA-box         | 1976           | 1985          | core promoter element around -30 of transcription start             |
| <i>CsDof38</i> | TATA-box         | 1977           | 1983          | core promoter element around -30 of transcription start             |
| <i>CsDof38</i> | TATA-box         | 1978           | 1985          | core promoter element around -30 of transcription start             |
| <i>CsDof38</i> | TATA-box         | 1979           | 1985          | core promoter element around -30 of transcription start             |
| <i>CsDof38</i> | TATA-box         | 1980           | 1986          | core promoter element around -30 of transcription start             |
| <i>CsDof38</i> | TATA-box         | 1981           | 1985          | core promoter element around -30 of transcription start             |
| <i>CsDof38</i> | GT1-motif        | 1650           | 1656          | light responsive element                                            |
| <i>CsDof39</i> | ABRE             | 692            | 701           | abscisic acid responsiveness                                        |
| <i>CsDof39</i> | ABRE             | 694            | 700           | abscisic acid responsiveness                                        |
| <i>CsDof39</i> | ABRE             | 695            | 700           | abscisic acid responsiveness                                        |
| <i>CsDof39</i> | ABRE             | 891            | 900           | abscisic acid responsiveness                                        |
| <i>CsDof39</i> | ABRE             | 893            | 899           | abscisic acid responsiveness                                        |
| <i>CsDof39</i> | ABRE             | 894            | 899           | abscisic acid responsiveness                                        |
| <i>CsDof39</i> | ABRE             | 982            | 988           | abscisic acid responsiveness                                        |
| <i>CsDof39</i> | ABRE             | 983            | 988           | abscisic acid responsiveness                                        |
| <i>CsDof39</i> | ABRE             | 1003           | 1008          | abscisic acid responsiveness                                        |
| <i>CsDof39</i> | ABRE             | 1052           | 1058          | abscisic acid responsiveness                                        |
| <i>CsDof39</i> | ABRE             | 1053           | 1058          | abscisic acid responsiveness                                        |
| <i>CsDof39</i> | TATC-box         | 643            | 650           | cis-acting element involved in gibberellin-responsiveness           |
| <i>CsDof39</i> | LTR              | 1026           | 1032          | cis-acting element involved in low-temperature responsiveness       |
| <i>CsDof39</i> | ARE              | 12             | 18            | cis-acting regulatory element essential for the anaerobic induction |
| <i>CsDof39</i> | ARE              | 62             | 68            | cis-acting regulatory element essential for the anaerobic induction |
| <i>CsDof39</i> | ARE              | 1598           | 1604          | cis-acting regulatory element essential for the anaerobic induction |
| <i>CsDof39</i> | AuxRR-core       | 969            | 976           | cis-acting regulatory element involved in auxin responsiveness      |

| Name           | Cis-element | Start position | Stop position | Function                                                          |
|----------------|-------------|----------------|---------------|-------------------------------------------------------------------|
| <i>CsDof39</i> | G-box       | 88             | 94            | cis-acting regulatory element involved in light responsiveness    |
| <i>CsDof39</i> | G-box       | 691            | 703           | cis-acting regulatory element involved in light responsiveness    |
| <i>CsDof39</i> | G-box       | 692            | 701           | cis-acting regulatory element involved in light responsiveness    |
| <i>CsDof39</i> | G-box       | 694            | 700           | cis-acting regulatory element involved in light responsiveness    |
| <i>CsDof39</i> | G-box       | 891            | 900           | cis-acting regulatory element involved in light responsiveness    |
| <i>CsDof39</i> | G-box       | 893            | 899           | cis-acting regulatory element involved in light responsiveness    |
| <i>CsDof39</i> | G-box       | 982            | 988           | cis-acting regulatory element involved in light responsiveness    |
| <i>CsDof39</i> | G-box       | 1002           | 1008          | cis-acting regulatory element involved in light responsiveness    |
| <i>CsDof39</i> | G-box       | 1050           | 1059          | cis-acting regulatory element involved in light responsiveness    |
| <i>CsDof39</i> | G-box       | 1052           | 1058          | cis-acting regulatory element involved in light responsiveness    |
| <i>CsDof39</i> | G-Box       | 694            | 700           | cis-acting regulatory element involved in light responsiveness    |
| <i>CsDof39</i> | G-Box       | 893            | 899           | cis-acting regulatory element involved in light responsiveness    |
| <i>CsDof39</i> | G-Box       | 982            | 988           | cis-acting regulatory element involved in light responsiveness    |
| <i>CsDof39</i> | G-Box       | 1052           | 1058          | cis-acting regulatory element involved in light responsiveness    |
| <i>CsDof39</i> | TGACG-motif | 364            | 369           | cis-acting regulatory element involved in the MeJA-responsiveness |
| <i>CsDof39</i> | TGACG-motif | 375            | 380           | cis-acting regulatory element involved in the MeJA-responsiveness |
| <i>CsDof39</i> | TGACG-motif | 923            | 928           | cis-acting regulatory element involved in the MeJA-responsiveness |
| <i>CsDof39</i> | TGACG-motif | 1001           | 1006          | cis-acting regulatory element involved in the MeJA-responsiveness |
| <i>CsDof39</i> | TGACG-motif | 1371           | 1376          | cis-acting regulatory element involved in the MeJA-responsiveness |
| <i>CsDof39</i> | TGACG-motif | 1882           | 1887          | cis-acting regulatory element involved in the MeJA-responsiveness |
| <i>CsDof39</i> | CGTCA-motif | 364            | 369           | cis-acting regulatory element involved in the MeJA-responsiveness |
| <i>CsDof39</i> | CGTCA-motif | 375            | 380           | cis-acting regulatory element involved in the MeJA-responsiveness |
| <i>CsDof39</i> | CGTCA-motif | 923            | 928           | cis-acting regulatory element involved in the MeJA-responsiveness |
| <i>CsDof39</i> | CGTCA-motif | 1001           | 1006          | cis-acting regulatory element involved in the MeJA-responsiveness |
| <i>CsDof39</i> | CGTCA-motif | 1371           | 1376          | cis-acting regulatory element involved in the MeJA-responsiveness |
| <i>CsDof39</i> | CGTCA-motif | 1882           | 1887          | cis-acting regulatory element involved in the MeJA-responsiveness |
| <i>CsDof39</i> | CAT-box     | 1703           | 1709          | cis-acting regulatory element related to meristem expression      |
| <i>CsDof39</i> | CAAT-box    | 4              | 9             | common cis-acting element in promoter and enhancer regions        |
| <i>CsDof39</i> | CAAT-box    | 9              | 14            | common cis-acting element in promoter and enhancer regions        |
| <i>CsDof39</i> | CAAT-box    | 195            | 200           | common cis-acting element in promoter and enhancer regions        |
| <i>CsDof39</i> | CAAT-box    | 583            | 588           | common cis-acting element in promoter and enhancer regions        |
| <i>CsDof39</i> | CAAT-box    | 825            | 830           | common cis-acting element in promoter and enhancer regions        |
| <i>CsDof39</i> | CAAT-box    | 909            | 914           | common cis-acting element in promoter and enhancer regions        |
| <i>CsDof39</i> | CAAT-box    | 974            | 979           | common cis-acting element in promoter and enhancer regions        |
| <i>CsDof39</i> | CAAT-box    | 1403           | 1408          | common cis-acting element in promoter and enhancer regions        |
| <i>CsDof39</i> | CAAT-box    | 1443           | 1448          | common cis-acting element in promoter and enhancer regions        |
| <i>CsDof39</i> | TATA-box    | 207            | 213           | core promoter element around -30 of transcription start           |
| <i>CsDof39</i> | TATA-box    | 208            | 214           | core promoter element around -30 of transcription start           |
| <i>CsDof39</i> | TATA-box    | 209            | 213           | core promoter element around -30 of transcription start           |
| <i>CsDof39</i> | TATA-box    | 285            | 297           | core promoter element around -30 of transcription start           |
| <i>CsDof39</i> | TATA-box    | 287            | 293           | core promoter element around -30 of transcription start           |
| <i>CsDof39</i> | TATA-box    | 288            | 294           | core promoter element around -30 of transcription start           |
| <i>CsDof39</i> | TATA-box    | 289            | 295           | core promoter element around -30 of transcription start           |
| <i>CsDof39</i> | TATA-box    | 290            | 296           | core promoter element around -30 of transcription start           |
| <i>CsDof39</i> | TATA-box    | 291            | 297           | core promoter element around -30 of transcription start           |
| <i>CsDof39</i> | TATA-box    | 292            | 298           | core promoter element around -30 of transcription start           |
| <i>CsDof39</i> | TATA-box    | 293            | 299           | core promoter element around -30 of transcription start           |
| <i>CsDof39</i> | TATA-box    | 294            | 300           | core promoter element around -30 of transcription start           |
| <i>CsDof39</i> | TATA-box    | 295            | 301           | core promoter element around -30 of transcription start           |
| <i>CsDof39</i> | TATA-box    | 296            | 302           | core promoter element around -30 of transcription start           |
| <i>CsDof39</i> | TATA-box    | 297            | 303           | core promoter element around -30 of transcription start           |

| Name           | Cis-element        | Start position | Stop position | Function                                                            |
|----------------|--------------------|----------------|---------------|---------------------------------------------------------------------|
| <i>CsDof39</i> | TATA-box           | 298            | 304           | core promoter element around -30 of transcription start             |
| <i>CsDof39</i> | TATA-box           | 299            | 305           | core promoter element around -30 of transcription start             |
| <i>CsDof39</i> | TATA-box           | 300            | 306           | core promoter element around -30 of transcription start             |
| <i>CsDof39</i> | TATA-box           | 301            | 307           | core promoter element around -30 of transcription start             |
| <i>CsDof39</i> | TATA-box           | 302            | 306           | core promoter element around -30 of transcription start             |
| <i>CsDof39</i> | TATA-box           | 316            | 321           | core promoter element around -30 of transcription start             |
| <i>CsDof39</i> | TATA-box           | 317            | 321           | core promoter element around -30 of transcription start             |
| <i>CsDof39</i> | TATA-box           | 339            | 343           | core promoter element around -30 of transcription start             |
| <i>CsDof39</i> | TATA-box           | 384            | 391           | core promoter element around -30 of transcription start             |
| <i>CsDof39</i> | TATA-box           | 385            | 391           | core promoter element around -30 of transcription start             |
| <i>CsDof39</i> | TATA-box           | 386            | 391           | core promoter element around -30 of transcription start             |
| <i>CsDof39</i> | TATA-box           | 387            | 391           | core promoter element around -30 of transcription start             |
| <i>CsDof39</i> | TATA-box           | 429            | 433           | core promoter element around -30 of transcription start             |
| <i>CsDof39</i> | TATA-box           | 533            | 537           | core promoter element around -30 of transcription start             |
| <i>CsDof39</i> | TATA-box           | 560            | 566           | core promoter element around -30 of transcription start             |
| <i>CsDof39</i> | TATA-box           | 561            | 566           | core promoter element around -30 of transcription start             |
| <i>CsDof39</i> | TATA-box           | 562            | 566           | core promoter element around -30 of transcription start             |
| <i>CsDof39</i> | TATA-box           | 589            | 594           | core promoter element around -30 of transcription start             |
| <i>CsDof39</i> | TATA-box           | 590            | 594           | core promoter element around -30 of transcription start             |
| <i>CsDof39</i> | TATA-box           | 846            | 852           | core promoter element around -30 of transcription start             |
| <i>CsDof39</i> | TATA-box           | 847            | 853           | core promoter element around -30 of transcription start             |
| <i>CsDof39</i> | TATA-box           | 848            | 852           | core promoter element around -30 of transcription start             |
| <i>CsDof39</i> | TATA-box           | 871            | 877           | core promoter element around -30 of transcription start             |
| <i>CsDof39</i> | TATA-box           | 872            | 876           | core promoter element around -30 of transcription start             |
| <i>CsDof39</i> | TATA-box           | 1013           | 1021          | core promoter element around -30 of transcription start             |
| <i>CsDof39</i> | TATA-box           | 1306           | 1312          | core promoter element around -30 of transcription start             |
| <i>CsDof39</i> | TATA-box           | 1307           | 1312          | core promoter element around -30 of transcription start             |
| <i>CsDof39</i> | TATA-box           | 1308           | 1312          | core promoter element around -30 of transcription start             |
| <i>CsDof39</i> | TATA-box           | 1573           | 1581          | core promoter element around -30 of transcription start             |
| <i>CsDof39</i> | TATA-box           | 1576           | 1581          | core promoter element around -30 of transcription start             |
| <i>CsDof39</i> | TATA-box           | 1577           | 1581          | core promoter element around -30 of transcription start             |
| <i>CsDof39</i> | TATA-box           | 1589           | 1596          | core promoter element around -30 of transcription start             |
| <i>CsDof39</i> | TATA-box           | 1966           | 1970          | core promoter element around -30 of transcription start             |
| <i>CsDof39</i> | GT1-motif          | 254            | 261           | light responsive element                                            |
| <i>CsDof39</i> | 3-AF1 binding site | 1633           | 1643          | light responsive element                                            |
| <i>CsDof39</i> | CCAAT-box          | 1296           | 1302          | MYBHv1 binding site                                                 |
| <i>CsDof40</i> | ABRE               | 692            | 701           | abscisic acid responsiveness                                        |
| <i>CsDof40</i> | ABRE               | 694            | 700           | abscisic acid responsiveness                                        |
| <i>CsDof40</i> | ABRE               | 695            | 700           | abscisic acid responsiveness                                        |
| <i>CsDof40</i> | ABRE               | 891            | 900           | abscisic acid responsiveness                                        |
| <i>CsDof40</i> | ABRE               | 893            | 899           | abscisic acid responsiveness                                        |
| <i>CsDof40</i> | ABRE               | 894            | 899           | abscisic acid responsiveness                                        |
| <i>CsDof40</i> | ABRE               | 982            | 988           | abscisic acid responsiveness                                        |
| <i>CsDof40</i> | ABRE               | 983            | 988           | abscisic acid responsiveness                                        |
| <i>CsDof40</i> | ABRE               | 1003           | 1008          | abscisic acid responsiveness                                        |
| <i>CsDof40</i> | ABRE               | 1052           | 1058          | abscisic acid responsiveness                                        |
| <i>CsDof40</i> | ABRE               | 1053           | 1058          | abscisic acid responsiveness                                        |
| <i>CsDof40</i> | TATC-box           | 643            | 650           | cis-acting element involved in gibberellin-responsiveness           |
| <i>CsDof40</i> | LTR                | 1026           | 1032          | cis-acting element involved in low-temperature responsiveness       |
| <i>CsDof40</i> | ARE                | 12             | 18            | cis-acting regulatory element essential for the anaerobic induction |
| <i>CsDof40</i> | ARE                | 62             | 68            | cis-acting regulatory element essential for the anaerobic induction |

| Name           | Cis-element | Start position | Stop position | Function                                                            |
|----------------|-------------|----------------|---------------|---------------------------------------------------------------------|
| <i>CsDof40</i> | ARE         | 1598           | 1604          | cis-acting regulatory element essential for the anaerobic induction |
| <i>CsDof40</i> | AuxRR-core  | 969            | 976           | cis-acting regulatory element involved in auxin responsiveness      |
| <i>CsDof40</i> | G-box       | 88             | 94            | cis-acting regulatory element involved in light responsiveness      |
| <i>CsDof40</i> | G-box       | 691            | 703           | cis-acting regulatory element involved in light responsiveness      |
| <i>CsDof40</i> | G-box       | 692            | 701           | cis-acting regulatory element involved in light responsiveness      |
| <i>CsDof40</i> | G-box       | 694            | 700           | cis-acting regulatory element involved in light responsiveness      |
| <i>CsDof40</i> | G-box       | 891            | 900           | cis-acting regulatory element involved in light responsiveness      |
| <i>CsDof40</i> | G-box       | 893            | 899           | cis-acting regulatory element involved in light responsiveness      |
| <i>CsDof40</i> | G-box       | 982            | 988           | cis-acting regulatory element involved in light responsiveness      |
| <i>CsDof40</i> | G-box       | 1002           | 1008          | cis-acting regulatory element involved in light responsiveness      |
| <i>CsDof40</i> | G-box       | 1050           | 1059          | cis-acting regulatory element involved in light responsiveness      |
| <i>CsDof40</i> | G-box       | 1052           | 1058          | cis-acting regulatory element involved in light responsiveness      |
| <i>CsDof40</i> | G-Box       | 694            | 700           | cis-acting regulatory element involved in light responsiveness      |
| <i>CsDof40</i> | G-Box       | 893            | 899           | cis-acting regulatory element involved in light responsiveness      |
| <i>CsDof40</i> | G-Box       | 982            | 988           | cis-acting regulatory element involved in light responsiveness      |
| <i>CsDof40</i> | G-Box       | 1052           | 1058          | cis-acting regulatory element involved in light responsiveness      |
| <i>CsDof40</i> | CGTCA-motif | 364            | 369           | cis-acting regulatory element involved in the MeJA-responsiveness   |
| <i>CsDof40</i> | CGTCA-motif | 375            | 380           | cis-acting regulatory element involved in the MeJA-responsiveness   |
| <i>CsDof40</i> | CGTCA-motif | 923            | 928           | cis-acting regulatory element involved in the MeJA-responsiveness   |
| <i>CsDof40</i> | CGTCA-motif | 1001           | 1006          | cis-acting regulatory element involved in the MeJA-responsiveness   |
| <i>CsDof40</i> | CGTCA-motif | 1371           | 1376          | cis-acting regulatory element involved in the MeJA-responsiveness   |
| <i>CsDof40</i> | CGTCA-motif | 1882           | 1887          | cis-acting regulatory element involved in the MeJA-responsiveness   |
| <i>CsDof40</i> | TGACG-motif | 364            | 369           | cis-acting regulatory element involved in the MeJA-responsiveness   |
| <i>CsDof40</i> | TGACG-motif | 375            | 380           | cis-acting regulatory element involved in the MeJA-responsiveness   |
| <i>CsDof40</i> | TGACG-motif | 923            | 928           | cis-acting regulatory element involved in the MeJA-responsiveness   |
| <i>CsDof40</i> | TGACG-motif | 1001           | 1006          | cis-acting regulatory element involved in the MeJA-responsiveness   |
| <i>CsDof40</i> | TGACG-motif | 1371           | 1376          | cis-acting regulatory element involved in the MeJA-responsiveness   |
| <i>CsDof40</i> | TGACG-motif | 1882           | 1887          | cis-acting regulatory element involved in the MeJA-responsiveness   |
| <i>CsDof40</i> | CAT-box     | 1703           | 1709          | cis-acting regulatory element related to meristem expression        |
| <i>CsDof40</i> | CAAT-box    | 4              | 9             | common cis-acting element in promoter and enhancer regions          |
| <i>CsDof40</i> | CAAT-box    | 9              | 14            | common cis-acting element in promoter and enhancer regions          |
| <i>CsDof40</i> | CAAT-box    | 195            | 200           | common cis-acting element in promoter and enhancer regions          |
| <i>CsDof40</i> | CAAT-box    | 583            | 588           | common cis-acting element in promoter and enhancer regions          |
| <i>CsDof40</i> | CAAT-box    | 825            | 830           | common cis-acting element in promoter and enhancer regions          |
| <i>CsDof40</i> | CAAT-box    | 909            | 914           | common cis-acting element in promoter and enhancer regions          |
| <i>CsDof40</i> | CAAT-box    | 974            | 979           | common cis-acting element in promoter and enhancer regions          |
| <i>CsDof40</i> | CAAT-box    | 1403           | 1408          | common cis-acting element in promoter and enhancer regions          |
| <i>CsDof40</i> | CAAT-box    | 1443           | 1448          | common cis-acting element in promoter and enhancer regions          |
| <i>CsDof40</i> | TATA-box    | 207            | 213           | core promoter element around -30 of transcription start             |
| <i>CsDof40</i> | TATA-box    | 208            | 214           | core promoter element around -30 of transcription start             |
| <i>CsDof40</i> | TATA-box    | 209            | 213           | core promoter element around -30 of transcription start             |
| <i>CsDof40</i> | TATA-box    | 285            | 297           | core promoter element around -30 of transcription start             |
| <i>CsDof40</i> | TATA-box    | 287            | 293           | core promoter element around -30 of transcription start             |
| <i>CsDof40</i> | TATA-box    | 288            | 294           | core promoter element around -30 of transcription start             |
| <i>CsDof40</i> | TATA-box    | 289            | 295           | core promoter element around -30 of transcription start             |
| <i>CsDof40</i> | TATA-box    | 290            | 296           | core promoter element around -30 of transcription start             |
| <i>CsDof40</i> | TATA-box    | 291            | 297           | core promoter element around -30 of transcription start             |
| <i>CsDof40</i> | TATA-box    | 292            | 298           | core promoter element around -30 of transcription start             |
| <i>CsDof40</i> | TATA-box    | 293            | 299           | core promoter element around -30 of transcription start             |
| <i>CsDof40</i> | TATA-box    | 294            | 300           | core promoter element around -30 of transcription start             |
| <i>CsDof40</i> | TATA-box    | 295            | 301           | core promoter element around -30 of transcription start             |

| Name           | Cis-element        | Start position | Stop position | Function                                                            |
|----------------|--------------------|----------------|---------------|---------------------------------------------------------------------|
| <i>CsDof40</i> | TATA-box           | 296            | 302           | core promoter element around -30 of transcription start             |
| <i>CsDof40</i> | TATA-box           | 297            | 303           | core promoter element around -30 of transcription start             |
| <i>CsDof40</i> | TATA-box           | 298            | 304           | core promoter element around -30 of transcription start             |
| <i>CsDof40</i> | TATA-box           | 299            | 305           | core promoter element around -30 of transcription start             |
| <i>CsDof40</i> | TATA-box           | 300            | 306           | core promoter element around -30 of transcription start             |
| <i>CsDof40</i> | TATA-box           | 301            | 307           | core promoter element around -30 of transcription start             |
| <i>CsDof40</i> | TATA-box           | 302            | 306           | core promoter element around -30 of transcription start             |
| <i>CsDof40</i> | TATA-box           | 316            | 321           | core promoter element around -30 of transcription start             |
| <i>CsDof40</i> | TATA-box           | 317            | 321           | core promoter element around -30 of transcription start             |
| <i>CsDof40</i> | TATA-box           | 339            | 343           | core promoter element around -30 of transcription start             |
| <i>CsDof40</i> | TATA-box           | 384            | 391           | core promoter element around -30 of transcription start             |
| <i>CsDof40</i> | TATA-box           | 385            | 391           | core promoter element around -30 of transcription start             |
| <i>CsDof40</i> | TATA-box           | 386            | 391           | core promoter element around -30 of transcription start             |
| <i>CsDof40</i> | TATA-box           | 387            | 391           | core promoter element around -30 of transcription start             |
| <i>CsDof40</i> | TATA-box           | 429            | 433           | core promoter element around -30 of transcription start             |
| <i>CsDof40</i> | TATA-box           | 533            | 537           | core promoter element around -30 of transcription start             |
| <i>CsDof40</i> | TATA-box           | 560            | 566           | core promoter element around -30 of transcription start             |
| <i>CsDof40</i> | TATA-box           | 561            | 566           | core promoter element around -30 of transcription start             |
| <i>CsDof40</i> | TATA-box           | 562            | 566           | core promoter element around -30 of transcription start             |
| <i>CsDof40</i> | TATA-box           | 589            | 594           | core promoter element around -30 of transcription start             |
| <i>CsDof40</i> | TATA-box           | 590            | 594           | core promoter element around -30 of transcription start             |
| <i>CsDof40</i> | TATA-box           | 846            | 852           | core promoter element around -30 of transcription start             |
| <i>CsDof40</i> | TATA-box           | 847            | 853           | core promoter element around -30 of transcription start             |
| <i>CsDof40</i> | TATA-box           | 848            | 852           | core promoter element around -30 of transcription start             |
| <i>CsDof40</i> | TATA-box           | 871            | 877           | core promoter element around -30 of transcription start             |
| <i>CsDof40</i> | TATA-box           | 872            | 876           | core promoter element around -30 of transcription start             |
| <i>CsDof40</i> | TATA-box           | 1013           | 1021          | core promoter element around -30 of transcription start             |
| <i>CsDof40</i> | TATA-box           | 1306           | 1312          | core promoter element around -30 of transcription start             |
| <i>CsDof40</i> | TATA-box           | 1307           | 1312          | core promoter element around -30 of transcription start             |
| <i>CsDof40</i> | TATA-box           | 1308           | 1312          | core promoter element around -30 of transcription start             |
| <i>CsDof40</i> | TATA-box           | 1573           | 1581          | core promoter element around -30 of transcription start             |
| <i>CsDof40</i> | TATA-box           | 1576           | 1581          | core promoter element around -30 of transcription start             |
| <i>CsDof40</i> | TATA-box           | 1577           | 1581          | core promoter element around -30 of transcription start             |
| <i>CsDof40</i> | TATA-box           | 1589           | 1596          | core promoter element around -30 of transcription start             |
| <i>CsDof40</i> | TATA-box           | 1966           | 1970          | core promoter element around -30 of transcription start             |
| <i>CsDof40</i> | 3-AF1 binding site | 1633           | 1643          | light responsive element                                            |
| <i>CsDof40</i> | GT1-motif          | 254            | 261           | light responsive element                                            |
| <i>CsDof40</i> | CCAAT-box          | 1296           | 1302          | MYBHv1 binding site                                                 |
| <i>CsDof41</i> | ABRE               | 641            | 650           | abscisic acid responsiveness                                        |
| <i>CsDof41</i> | ABRE               | 643            | 649           | abscisic acid responsiveness                                        |
| <i>CsDof41</i> | ABRE               | 644            | 649           | abscisic acid responsiveness                                        |
| <i>CsDof41</i> | ABRE               | 867            | 875           | abscisic acid responsiveness                                        |
| <i>CsDof41</i> | ABRE               | 869            | 874           | abscisic acid responsiveness                                        |
| <i>CsDof41</i> | ABRE               | 1425           | 1430          | abscisic acid responsiveness                                        |
| <i>CsDof41</i> | TGA-element        | 648            | 654           | auxin-responsive element                                            |
| <i>CsDof41</i> | LTR                | 975            | 981           | cis-acting element involved in low-temperature responsiveness       |
| <i>CsDof41</i> | TCA-element        | 367            | 376           | cis-acting element involved in salicylic acid responsiveness        |
| <i>CsDof41</i> | TCA-element        | 895            | 904           | cis-acting element involved in salicylic acid responsiveness        |
| <i>CsDof41</i> | A-box              | 460            | 466           | cis-acting regulatory element                                       |
| <i>CsDof41</i> | A-box              | 1639           | 1645          | cis-acting regulatory element                                       |
| <i>CsDof41</i> | ARE                | 1877           | 1883          | cis-acting regulatory element essential for the anaerobic induction |



| Name           | Cis-element | Start position | Stop position | Function                                                          |
|----------------|-------------|----------------|---------------|-------------------------------------------------------------------|
| <i>CsDof41</i> | G-box       | 642            | 650           | cis-acting regulatory element involved in light responsiveness    |
| <i>CsDof41</i> | G-box       | 643            | 649           | cis-acting regulatory element involved in light responsiveness    |
| <i>CsDof41</i> | G-box       | 869            | 875           | cis-acting regulatory element involved in light responsiveness    |
| <i>CsDof41</i> | G-Box       | 643            | 649           | cis-acting regulatory element involved in light responsiveness    |
| <i>CsDof41</i> | G-Box       | 1425           | 1431          | cis-acting regulatory element involved in light responsiveness    |
| <i>CsDof41</i> | TGACG-motif | 235            | 240           | cis-acting regulatory element involved in the MeJA-responsiveness |
| <i>CsDof41</i> | TGACG-motif | 718            | 723           | cis-acting regulatory element involved in the MeJA-responsiveness |
| <i>CsDof41</i> | TGACG-motif | 1281           | 1286          | cis-acting regulatory element involved in the MeJA-responsiveness |
| <i>CsDof41</i> | TGACG-motif | 1284           | 1289          | cis-acting regulatory element involved in the MeJA-responsiveness |
| <i>CsDof41</i> | CGTCA-motif | 235            | 240           | cis-acting regulatory element involved in the MeJA-responsiveness |
| <i>CsDof41</i> | CGTCA-motif | 718            | 723           | cis-acting regulatory element involved in the MeJA-responsiveness |
| <i>CsDof41</i> | CGTCA-motif | 1281           | 1286          | cis-acting regulatory element involved in the MeJA-responsiveness |
| <i>CsDof41</i> | CGTCA-motif | 1284           | 1289          | cis-acting regulatory element involved in the MeJA-responsiveness |
| <i>CsDof41</i> | CAT-box     | 1245           | 1251          | cis-acting regulatory element related to meristem expression      |
| <i>CsDof41</i> | CAAT-box    | 201            | 206           | common cis-acting element in promoter and enhancer regions        |
| <i>CsDof41</i> | CAAT-box    | 220            | 225           | common cis-acting element in promoter and enhancer regions        |
| <i>CsDof41</i> | CAAT-box    | 480            | 485           | common cis-acting element in promoter and enhancer regions        |
| <i>CsDof41</i> | CAAT-box    | 626            | 631           | common cis-acting element in promoter and enhancer regions        |
| <i>CsDof41</i> | CAAT-box    | 712            | 717           | common cis-acting element in promoter and enhancer regions        |
| <i>CsDof41</i> | CAAT-box    | 1012           | 1017          | common cis-acting element in promoter and enhancer regions        |
| <i>CsDof41</i> | CAAT-box    | 1143           | 1148          | common cis-acting element in promoter and enhancer regions        |
| <i>CsDof41</i> | CAAT-box    | 1238           | 1243          | common cis-acting element in promoter and enhancer regions        |
| <i>CsDof41</i> | CAAT-box    | 1836           | 1841          | common cis-acting element in promoter and enhancer regions        |
| <i>CsDof41</i> | TATA-box    | 2              | 8             | core promoter element around -30 of transcription start           |
| <i>CsDof41</i> | TATA-box    | 4              | 8             | core promoter element around -30 of transcription start           |
| <i>CsDof41</i> | TATA-box    | 102            | 106           | core promoter element around -30 of transcription start           |
| <i>CsDof41</i> | TATA-box    | 172            | 178           | core promoter element around -30 of transcription start           |
| <i>CsDof41</i> | TATA-box    | 173            | 177           | core promoter element around -30 of transcription start           |
| <i>CsDof41</i> | TATA-box    | 196            | 202           | core promoter element around -30 of transcription start           |
| <i>CsDof41</i> | TATA-box    | 197            | 202           | core promoter element around -30 of transcription start           |
| <i>CsDof41</i> | TATA-box    | 198            | 202           | core promoter element around -30 of transcription start           |
| <i>CsDof41</i> | TATA-box    | 382            | 386           | core promoter element around -30 of transcription start           |
| <i>CsDof41</i> | TATA-box    | 673            | 679           | core promoter element around -30 of transcription start           |
| <i>CsDof41</i> | TATA-box    | 675            | 681           | core promoter element around -30 of transcription start           |
| <i>CsDof41</i> | TATA-box    | 676            | 682           | core promoter element around -30 of transcription start           |
| <i>CsDof41</i> | TATA-box    | 677            | 681           | core promoter element around -30 of transcription start           |
| <i>CsDof41</i> | TATA-box    | 1043           | 1048          | core promoter element around -30 of transcription start           |
| <i>CsDof41</i> | TATA-box    | 1044           | 1048          | core promoter element around -30 of transcription start           |
| <i>CsDof41</i> | TATA-box    | 1049           | 1055          | core promoter element around -30 of transcription start           |
| <i>CsDof41</i> | TATA-box    | 1051           | 1055          | core promoter element around -30 of transcription start           |
| <i>CsDof41</i> | TATA-box    | 1056           | 1060          | core promoter element around -30 of transcription start           |
| <i>CsDof41</i> | TATA-box    | 1070           | 1076          | core promoter element around -30 of transcription start           |
| <i>CsDof41</i> | TATA-box    | 1071           | 1075          | core promoter element around -30 of transcription start           |
| <i>CsDof41</i> | TATA-box    | 1118           | 1123          | core promoter element around -30 of transcription start           |
| <i>CsDof41</i> | TATA-box    | 1119           | 1123          | core promoter element around -30 of transcription start           |
| <i>CsDof41</i> | TATA-box    | 1314           | 1321          | core promoter element around -30 of transcription start           |
| <i>CsDof41</i> | TATA-box    | 1317           | 1323          | core promoter element around -30 of transcription start           |
| <i>CsDof41</i> | TATA-box    | 1319           | 1323          | core promoter element around -30 of transcription start           |
| <i>CsDof41</i> | TATA-box    | 1371           | 1379          | core promoter element around -30 of transcription start           |
| <i>CsDof41</i> | TATA-box    | 1374           | 1381          | core promoter element around -30 of transcription start           |
| <i>CsDof41</i> | TATA-box    | 1375           | 1381          | core promoter element around -30 of transcription start           |

| Name           | Cis-element | Start position | Stop position | Function                                                            |
|----------------|-------------|----------------|---------------|---------------------------------------------------------------------|
| <i>CsDof41</i> | TATA-box    | 1376           | 1382          | core promoter element around -30 of transcription start             |
| <i>CsDof41</i> | TATA-box    | 1377           | 1381          | core promoter element around -30 of transcription start             |
| <i>CsDof41</i> | TATA-box    | 1414           | 1420          | core promoter element around -30 of transcription start             |
| <i>CsDof41</i> | TATA-box    | 1415           | 1421          | core promoter element around -30 of transcription start             |
| <i>CsDof41</i> | TATA-box    | 1416           | 1422          | core promoter element around -30 of transcription start             |
| <i>CsDof41</i> | TATA-box    | 1417           | 1421          | core promoter element around -30 of transcription start             |
| <i>CsDof41</i> | TATA-box    | 1473           | 1477          | core promoter element around -30 of transcription start             |
| <i>CsDof41</i> | TATA-box    | 1492           | 1498          | core promoter element around -30 of transcription start             |
| <i>CsDof41</i> | TATA-box    | 1493           | 1498          | core promoter element around -30 of transcription start             |
| <i>CsDof41</i> | TATA-box    | 1494           | 1498          | core promoter element around -30 of transcription start             |
| <i>CsDof41</i> | TATA-box    | 1780           | 1784          | core promoter element around -30 of transcription start             |
| <i>CsDof41</i> | TATA-box    | 1802           | 1810          | core promoter element around -30 of transcription start             |
| <i>CsDof41</i> | TATA-box    | 1805           | 1817          | core promoter element around -30 of transcription start             |
| <i>CsDof41</i> | TATA-box    | 1808           | 1812          | core promoter element around -30 of transcription start             |
| <i>CsDof41</i> | TATA-box    | 1813           | 1819          | core promoter element around -30 of transcription start             |
| <i>CsDof41</i> | TATA-box    | 1814           | 1820          | core promoter element around -30 of transcription start             |
| <i>CsDof41</i> | TATA-box    | 1816           | 1820          | core promoter element around -30 of transcription start             |
| <i>CsDof41</i> | TATA-box    | 1841           | 1850          | core promoter element around -30 of transcription start             |
| <i>CsDof41</i> | TATA-box    | 1842           | 1849          | core promoter element around -30 of transcription start             |
| <i>CsDof41</i> | TATA-box    | 1843           | 1849          | core promoter element around -30 of transcription start             |
| <i>CsDof41</i> | TATA-box    | 1844           | 1851          | core promoter element around -30 of transcription start             |
| <i>CsDof41</i> | TATA-box    | 1845           | 1851          | core promoter element around -30 of transcription start             |
| <i>CsDof41</i> | TATA-box    | 1846           | 1852          | core promoter element around -30 of transcription start             |
| <i>CsDof41</i> | TATA-box    | 1847           | 1851          | core promoter element around -30 of transcription start             |
| <i>CsDof41</i> | GC-motif    | 1645           | 1651          | enhancer-like element involved in anoxic specific inducibility      |
| <i>CsDof41</i> | CCAAT-box   | 779            | 785           | MYBHv1 binding site                                                 |
| <i>CsDof42</i> | ABRE        | 769            | 775           | abscisic acid responsiveness                                        |
| <i>CsDof42</i> | ABRE        | 770            | 775           | abscisic acid responsiveness                                        |
| <i>CsDof42</i> | ABRE        | 839            | 848           | abscisic acid responsiveness                                        |
| <i>CsDof42</i> | ABRE        | 841            | 847           | abscisic acid responsiveness                                        |
| <i>CsDof42</i> | ABRE        | 842            | 847           | abscisic acid responsiveness                                        |
| <i>CsDof42</i> | TGA-element | 1752           | 1758          | auxin-responsive element                                            |
| <i>CsDof42</i> | ARE         | 282            | 288           | cis-acting regulatory element essential for the anaerobic induction |
| <i>CsDof42</i> | ARE         | 621            | 627           | cis-acting regulatory element essential for the anaerobic induction |
| <i>CsDof42</i> | ARE         | 1120           | 1126          | cis-acting regulatory element essential for the anaerobic induction |
| <i>CsDof42</i> | ARE         | 1526           | 1532          | cis-acting regulatory element essential for the anaerobic induction |
| <i>CsDof42</i> | circadian   | 291            | 300           | cis-acting regulatory element involved in circadian control         |
| <i>CsDof42</i> | circadian   | 719            | 728           | cis-acting regulatory element involved in circadian control         |
| <i>CsDof42</i> | circadian   | 1597           | 1606          | cis-acting regulatory element involved in circadian control         |
| <i>CsDof42</i> | G-Box       | 769            | 775           | cis-acting regulatory element involved in light responsiveness      |
| <i>CsDof42</i> | G-Box       | 841            | 847           | cis-acting regulatory element involved in light responsiveness      |
| <i>CsDof42</i> | G-box       | 768            | 776           | cis-acting regulatory element involved in light responsiveness      |
| <i>CsDof42</i> | G-box       | 769            | 775           | cis-acting regulatory element involved in light responsiveness      |
| <i>CsDof42</i> | G-box       | 841            | 847           | cis-acting regulatory element involved in light responsiveness      |
| <i>CsDof42</i> | CAAT-box    | 247            | 252           | common cis-acting element in promoter and enhancer regions          |
| <i>CsDof42</i> | CAAT-box    | 291            | 296           | common cis-acting element in promoter and enhancer regions          |
| <i>CsDof42</i> | CAAT-box    | 337            | 342           | common cis-acting element in promoter and enhancer regions          |
| <i>CsDof42</i> | CAAT-box    | 927            | 932           | common cis-acting element in promoter and enhancer regions          |
| <i>CsDof42</i> | CAAT-box    | 1472           | 1477          | common cis-acting element in promoter and enhancer regions          |
| <i>CsDof42</i> | CAAT-box    | 1610           | 1615          | common cis-acting element in promoter and enhancer regions          |
| <i>CsDof42</i> | CAAT-box    | 1711           | 1716          | common cis-acting element in promoter and enhancer regions          |

| <b>Name</b>    | <b>Cis-element</b> | <b>Start position</b> | <b>Stop position</b> | <b>Function</b>                                            |
|----------------|--------------------|-----------------------|----------------------|------------------------------------------------------------|
| <i>CsDof42</i> | CAAT-box           | 1870                  | 1875                 | common cis-acting element in promoter and enhancer regions |
| <i>CsDof42</i> | CAAT-box           | 1891                  | 1896                 | common cis-acting element in promoter and enhancer regions |
| <i>CsDof42</i> | TATA-box           | 17                    | 23                   | core promoter element around -30 of transcription start    |
| <i>CsDof42</i> | TATA-box           | 18                    | 22                   | core promoter element around -30 of transcription start    |
| <i>CsDof42</i> | TATA-box           | 71                    | 77                   | core promoter element around -30 of transcription start    |
| <i>CsDof42</i> | TATA-box           | 73                    | 77                   | core promoter element around -30 of transcription start    |
| <i>CsDof42</i> | TATA-box           | 97                    | 101                  | core promoter element around -30 of transcription start    |
| <i>CsDof42</i> | TATA-box           | 120                   | 126                  | core promoter element around -30 of transcription start    |
| <i>CsDof42</i> | TATA-box           | 121                   | 125                  | core promoter element around -30 of transcription start    |
| <i>CsDof42</i> | TATA-box           | 235                   | 243                  | core promoter element around -30 of transcription start    |
| <i>CsDof42</i> | TATA-box           | 239                   | 248                  | core promoter element around -30 of transcription start    |
| <i>CsDof42</i> | TATA-box           | 240                   | 247                  | core promoter element around -30 of transcription start    |
| <i>CsDof42</i> | TATA-box           | 241                   | 247                  | core promoter element around -30 of transcription start    |
| <i>CsDof42</i> | TATA-box           | 242                   | 247                  | core promoter element around -30 of transcription start    |
| <i>CsDof42</i> | TATA-box           | 243                   | 247                  | core promoter element around -30 of transcription start    |
| <i>CsDof42</i> | TATA-box           | 294                   | 300                  | core promoter element around -30 of transcription start    |
| <i>CsDof42</i> | TATA-box           | 295                   | 299                  | core promoter element around -30 of transcription start    |
| <i>CsDof42</i> | TATA-box           | 365                   | 371                  | core promoter element around -30 of transcription start    |
| <i>CsDof42</i> | TATA-box           | 366                   | 371                  | core promoter element around -30 of transcription start    |
| <i>CsDof42</i> | TATA-box           | 367                   | 371                  | core promoter element around -30 of transcription start    |
| <i>CsDof42</i> | TATA-box           | 446                   | 453                  | core promoter element around -30 of transcription start    |
| <i>CsDof42</i> | TATA-box           | 449                   | 455                  | core promoter element around -30 of transcription start    |
| <i>CsDof42</i> | TATA-box           | 451                   | 455                  | core promoter element around -30 of transcription start    |
| <i>CsDof42</i> | TATA-box           | 466                   | 472                  | core promoter element around -30 of transcription start    |
| <i>CsDof42</i> | TATA-box           | 468                   | 472                  | core promoter element around -30 of transcription start    |
| <i>CsDof42</i> | TATA-box           | 527                   | 536                  | core promoter element around -30 of transcription start    |
| <i>CsDof42</i> | TATA-box           | 528                   | 534                  | core promoter element around -30 of transcription start    |
| <i>CsDof42</i> | TATA-box           | 529                   | 536                  | core promoter element around -30 of transcription start    |
| <i>CsDof42</i> | TATA-box           | 530                   | 536                  | core promoter element around -30 of transcription start    |
| <i>CsDof42</i> | TATA-box           | 531                   | 537                  | core promoter element around -30 of transcription start    |
| <i>CsDof42</i> | TATA-box           | 532                   | 536                  | core promoter element around -30 of transcription start    |
| <i>CsDof42</i> | TATA-box           | 699                   | 706                  | core promoter element around -30 of transcription start    |
| <i>CsDof42</i> | TATA-box           | 951                   | 957                  | core promoter element around -30 of transcription start    |
| <i>CsDof42</i> | TATA-box           | 952                   | 956                  | core promoter element around -30 of transcription start    |
| <i>CsDof42</i> | TATA-box           | 977                   | 981                  | core promoter element around -30 of transcription start    |
| <i>CsDof42</i> | TATA-box           | 1094                  | 1100                 | core promoter element around -30 of transcription start    |
| <i>CsDof42</i> | TATA-box           | 1095                  | 1101                 | core promoter element around -30 of transcription start    |
| <i>CsDof42</i> | TATA-box           | 1096                  | 1100                 | core promoter element around -30 of transcription start    |
| <i>CsDof42</i> | TATA-box           | 1183                  | 1189                 | core promoter element around -30 of transcription start    |
| <i>CsDof42</i> | TATA-box           | 1185                  | 1189                 | core promoter element around -30 of transcription start    |
| <i>CsDof42</i> | TATA-box           | 1192                  | 1198                 | core promoter element around -30 of transcription start    |
| <i>CsDof42</i> | TATA-box           | 1194                  | 1198                 | core promoter element around -30 of transcription start    |
| <i>CsDof42</i> | TATA-box           | 1227                  | 1239                 | core promoter element around -30 of transcription start    |
| <i>CsDof42</i> | TATA-box           | 1236                  | 1240                 | core promoter element around -30 of transcription start    |
| <i>CsDof42</i> | TATA-box           | 1620                  | 1628                 | core promoter element around -30 of transcription start    |
| <i>CsDof42</i> | TATA-box           | 1766                  | 1770                 | core promoter element around -30 of transcription start    |
| <i>CsDof42</i> | TATA-box           | 1785                  | 1791                 | core promoter element around -30 of transcription start    |
| <i>CsDof42</i> | TATA-box           | 1787                  | 1793                 | core promoter element around -30 of transcription start    |
| <i>CsDof42</i> | TATA-box           | 1788                  | 1794                 | core promoter element around -30 of transcription start    |
| <i>CsDof42</i> | TATA-box           | 1789                  | 1795                 | core promoter element around -30 of transcription start    |
| <i>CsDof42</i> | TATA-box           | 1790                  | 1796                 | core promoter element around -30 of transcription start    |

| Name           | Cis-element      | Start position | Stop position | Function                                                            |
|----------------|------------------|----------------|---------------|---------------------------------------------------------------------|
| <i>CsDof42</i> | TATA-box         | 1791           | 1797          | core promoter element around -30 of transcription start             |
| <i>CsDof42</i> | TATA-box         | 1792           | 1798          | core promoter element around -30 of transcription start             |
| <i>CsDof42</i> | TATA-box         | 1793           | 1799          | core promoter element around -30 of transcription start             |
| <i>CsDof42</i> | TATA-box         | 1794           | 1800          | core promoter element around -30 of transcription start             |
| <i>CsDof42</i> | TATA-box         | 1795           | 1801          | core promoter element around -30 of transcription start             |
| <i>CsDof42</i> | TATA-box         | 1796           | 1802          | core promoter element around -30 of transcription start             |
| <i>CsDof42</i> | TATA-box         | 1797           | 1803          | core promoter element around -30 of transcription start             |
| <i>CsDof42</i> | TATA-box         | 1798           | 1804          | core promoter element around -30 of transcription start             |
| <i>CsDof42</i> | TATA-box         | 1799           | 1805          | core promoter element around -30 of transcription start             |
| <i>CsDof42</i> | TATA-box         | 1800           | 1806          | core promoter element around -30 of transcription start             |
| <i>CsDof42</i> | TATA-box         | 1801           | 1805          | core promoter element around -30 of transcription start             |
| <i>CsDof42</i> | AT-rich sequence | 1858           | 1867          | element for maximal elicitor-mediated activation (2copies)          |
| <i>CsDof42</i> | MRE              | 1016           | 1023          | MYB binding site involved in light responsiveness                   |
| <i>CsDof42</i> | MRE              | 1541           | 1548          | MYB binding site involved in light responsiveness                   |
| <i>CsDof42</i> | CCAAT-box        | 945            | 951           | MYBHv1 binding site                                                 |
| <i>CsDof43</i> | ABRE             | 1107           | 1112          | abscisic acid responsiveness                                        |
| <i>CsDof43</i> | LTR              | 434            | 440           | cis-acting element involved in low-temperature responsiveness       |
| <i>CsDof43</i> | ARE              | 189            | 195           | cis-acting regulatory element essential for the anaerobic induction |
| <i>CsDof43</i> | ARE              | 370            | 376           | cis-acting regulatory element essential for the anaerobic induction |
| <i>CsDof43</i> | ARE              | 858            | 864           | cis-acting regulatory element essential for the anaerobic induction |
| <i>CsDof43</i> | ARE              | 1945           | 1951          | cis-acting regulatory element essential for the anaerobic induction |
| <i>CsDof43</i> | G-box            | 1107           | 1113          | cis-acting regulatory element involved in light responsiveness      |
| <i>CsDof43</i> | TGACG-motif      | 887            | 892           | cis-acting regulatory element involved in the MeJA-responsiveness   |
| <i>CsDof43</i> | TGACG-motif      | 942            | 947           | cis-acting regulatory element involved in the MeJA-responsiveness   |
| <i>CsDof43</i> | CGTCA-motif      | 887            | 892           | cis-acting regulatory element involved in the MeJA-responsiveness   |
| <i>CsDof43</i> | CGTCA-motif      | 942            | 947           | cis-acting regulatory element involved in the MeJA-responsiveness   |
| <i>CsDof43</i> | CAAT-box         | 163            | 168           | common cis-acting element in promoter and enhancer regions          |
| <i>CsDof43</i> | CAAT-box         | 225            | 230           | common cis-acting element in promoter and enhancer regions          |
| <i>CsDof43</i> | CAAT-box         | 241            | 246           | common cis-acting element in promoter and enhancer regions          |
| <i>CsDof43</i> | CAAT-box         | 256            | 261           | common cis-acting element in promoter and enhancer regions          |
| <i>CsDof43</i> | CAAT-box         | 271            | 276           | common cis-acting element in promoter and enhancer regions          |
| <i>CsDof43</i> | CAAT-box         | 360            | 365           | common cis-acting element in promoter and enhancer regions          |
| <i>CsDof43</i> | CAAT-box         | 512            | 517           | common cis-acting element in promoter and enhancer regions          |
| <i>CsDof43</i> | CAAT-box         | 865            | 870           | common cis-acting element in promoter and enhancer regions          |
| <i>CsDof43</i> | CAAT-box         | 1349           | 1354          | common cis-acting element in promoter and enhancer regions          |
| <i>CsDof43</i> | CAAT-box         | 1669           | 1674          | common cis-acting element in promoter and enhancer regions          |
| <i>CsDof43</i> | CAAT-box         | 1672           | 1677          | common cis-acting element in promoter and enhancer regions          |
| <i>CsDof43</i> | CAAT-box         | 1728           | 1733          | common cis-acting element in promoter and enhancer regions          |
| <i>CsDof43</i> | TATA-box         | 168            | 172           | core promoter element around -30 of transcription start             |
| <i>CsDof43</i> | TATA-box         | 173            | 177           | core promoter element around -30 of transcription start             |
| <i>CsDof43</i> | TATA-box         | 179            | 185           | core promoter element around -30 of transcription start             |
| <i>CsDof43</i> | TATA-box         | 180            | 185           | core promoter element around -30 of transcription start             |
| <i>CsDof43</i> | TATA-box         | 181            | 185           | core promoter element around -30 of transcription start             |
| <i>CsDof43</i> | TATA-box         | 266            | 275           | core promoter element around -30 of transcription start             |
| <i>CsDof43</i> | TATA-box         | 312            | 319           | core promoter element around -30 of transcription start             |
| <i>CsDof43</i> | TATA-box         | 313            | 319           | core promoter element around -30 of transcription start             |
| <i>CsDof43</i> | TATA-box         | 314            | 319           | core promoter element around -30 of transcription start             |
| <i>CsDof43</i> | TATA-box         | 315            | 319           | core promoter element around -30 of transcription start             |
| <i>CsDof43</i> | TATA-box         | 455            | 459           | core promoter element around -30 of transcription start             |
| <i>CsDof43</i> | TATA-box         | 492            | 499           | core promoter element around -30 of transcription start             |
| <i>CsDof43</i> | TATA-box         | 621            | 630           | core promoter element around -30 of transcription start             |



| Name           | Cis-element      | Start position | Stop position | Function                                                             |
|----------------|------------------|----------------|---------------|----------------------------------------------------------------------|
| <i>CsDof43</i> | TATA-box         | 1540           | 1546          | core promoter element around -30 of transcription start              |
| <i>CsDof43</i> | TATA-box         | 1541           | 1547          | core promoter element around -30 of transcription start              |
| <i>CsDof43</i> | TATA-box         | 1542           | 1548          | core promoter element around -30 of transcription start              |
| <i>CsDof43</i> | TATA-box         | 1543           | 1549          | core promoter element around -30 of transcription start              |
| <i>CsDof43</i> | TATA-box         | 1544           | 1550          | core promoter element around -30 of transcription start              |
| <i>CsDof43</i> | TATA-box         | 1545           | 1551          | core promoter element around -30 of transcription start              |
| <i>CsDof43</i> | TATA-box         | 1546           | 1552          | core promoter element around -30 of transcription start              |
| <i>CsDof43</i> | TATA-box         | 1547           | 1553          | core promoter element around -30 of transcription start              |
| <i>CsDof43</i> | TATA-box         | 1548           | 1552          | core promoter element around -30 of transcription start              |
| <i>CsDof43</i> | TATA-box         | 1675           | 1681          | core promoter element around -30 of transcription start              |
| <i>CsDof43</i> | TATA-box         | 1677           | 1683          | core promoter element around -30 of transcription start              |
| <i>CsDof43</i> | TATA-box         | 1678           | 1684          | core promoter element around -30 of transcription start              |
| <i>CsDof43</i> | TATA-box         | 1679           | 1683          | core promoter element around -30 of transcription start              |
| <i>CsDof43</i> | TATA-box         | 1683           | 1689          | core promoter element around -30 of transcription start              |
| <i>CsDof43</i> | TATA-box         | 1684           | 1690          | core promoter element around -30 of transcription start              |
| <i>CsDof43</i> | TATA-box         | 1685           | 1691          | core promoter element around -30 of transcription start              |
| <i>CsDof43</i> | TATA-box         | 1686           | 1690          | core promoter element around -30 of transcription start              |
| <i>CsDof43</i> | TATA-box         | 1734           | 1739          | core promoter element around -30 of transcription start              |
| <i>CsDof43</i> | TATA-box         | 1735           | 1739          | core promoter element around -30 of transcription start              |
| <i>CsDof43</i> | TATA-box         | 1752           | 1756          | core promoter element around -30 of transcription start              |
| <i>CsDof43</i> | TATA-box         | 1764           | 1770          | core promoter element around -30 of transcription start              |
| <i>CsDof43</i> | TATA-box         | 1765           | 1769          | core promoter element around -30 of transcription start              |
| <i>CsDof43</i> | TATA-box         | 1788           | 1794          | core promoter element around -30 of transcription start              |
| <i>CsDof43</i> | TATA-box         | 1789           | 1795          | core promoter element around -30 of transcription start              |
| <i>CsDof43</i> | TATA-box         | 1790           | 1796          | core promoter element around -30 of transcription start              |
| <i>CsDof43</i> | TATA-box         | 1791           | 1797          | core promoter element around -30 of transcription start              |
| <i>CsDof43</i> | TATA-box         | 1792           | 1796          | core promoter element around -30 of transcription start              |
| <i>CsDof43</i> | TATA-box         | 1804           | 1810          | core promoter element around -30 of transcription start              |
| <i>CsDof43</i> | TATA-box         | 1806           | 1812          | core promoter element around -30 of transcription start              |
| <i>CsDof43</i> | TATA-box         | 1807           | 1813          | core promoter element around -30 of transcription start              |
| <i>CsDof43</i> | TATA-box         | 1808           | 1814          | core promoter element around -30 of transcription start              |
| <i>CsDof43</i> | TATA-box         | 1809           | 1815          | core promoter element around -30 of transcription start              |
| <i>CsDof43</i> | TATA-box         | 1810           | 1814          | core promoter element around -30 of transcription start              |
| <i>CsDof43</i> | TATA-box         | 1891           | 1897          | core promoter element around -30 of transcription start              |
| <i>CsDof43</i> | TATA-box         | 1892           | 1896          | core promoter element around -30 of transcription start              |
| <i>CsDof43</i> | AT-rich sequence | 393            | 402           | element for maximal elicitor-mediated activation (2copies)           |
| <i>CsDof43</i> | GT1-motif        | 891            | 897           | light responsive element                                             |
| <i>CsDof43</i> | MBS              | 201            | 207           | MYB binding site involved in drought-inducibility                    |
| <i>CsDof44</i> | ABRE             | 1025           | 1032          | abscisic acid responsiveness                                         |
| <i>CsDof44</i> | ABRE             | 1381           | 1386          | abscisic acid responsiveness                                         |
| <i>CsDof44</i> | ABRE             | 1665           | 1670          | abscisic acid responsiveness                                         |
| <i>CsDof44</i> | TGA-element      | 181            | 187           | auxin-responsive element                                             |
| <i>CsDof44</i> | TCA-element      | 787            | 796           | cis-acting element involved in salicylic acid responsiveness         |
| <i>CsDof44</i> | ARE              | 400            | 406           | cis-acting regulatory element essential for the anaerobic induction  |
| <i>CsDof44</i> | ARE              | 477            | 483           | cis-acting regulatory element essential for the anaerobic induction  |
| <i>CsDof44</i> | ARE              | 1082           | 1088          | cis-acting regulatory element essential for the anaerobic induction  |
| <i>CsDof44</i> | G-Box            | 1380           | 1386          | cis-acting regulatory element involved in light responsiveness       |
| <i>CsDof44</i> | G-Box            | 1665           | 1671          | cis-acting regulatory element involved in light responsiveness       |
| <i>CsDof44</i> | CGTCA-motif      | 1070           | 1075          | cis-acting regulatory element involved in the MeJA-responsiveness    |
| <i>CsDof44</i> | TGACG-motif      | 1070           | 1075          | cis-acting regulatory element involved in the MeJA-responsiveness    |
| <i>CsDof44</i> | O2-site          | 1234           | 1244          | cis-acting regulatory element involved in zein metabolism regulation |

| Name           | Cis-element | Start position | Stop position | Function                                                   |
|----------------|-------------|----------------|---------------|------------------------------------------------------------|
| <i>CsDof44</i> | CAAT-box    | 120            | 125           | common cis-acting element in promoter and enhancer regions |
| <i>CsDof44</i> | CAAT-box    | 299            | 304           | common cis-acting element in promoter and enhancer regions |
| <i>CsDof44</i> | CAAT-box    | 440            | 445           | common cis-acting element in promoter and enhancer regions |
| <i>CsDof44</i> | CAAT-box    | 451            | 456           | common cis-acting element in promoter and enhancer regions |
| <i>CsDof44</i> | CAAT-box    | 1005           | 1010          | common cis-acting element in promoter and enhancer regions |
| <i>CsDof44</i> | CAAT-box    | 1064           | 1069          | common cis-acting element in promoter and enhancer regions |
| <i>CsDof44</i> | CAAT-box    | 1076           | 1081          | common cis-acting element in promoter and enhancer regions |
| <i>CsDof44</i> | CAAT-box    | 1330           | 1335          | common cis-acting element in promoter and enhancer regions |
| <i>CsDof44</i> | CAAT-box    | 1346           | 1351          | common cis-acting element in promoter and enhancer regions |
| <i>CsDof44</i> | CAAT-box    | 1546           | 1551          | common cis-acting element in promoter and enhancer regions |
| <i>CsDof44</i> | CAAT-box    | 1748           | 1753          | common cis-acting element in promoter and enhancer regions |
| <i>CsDof44</i> | CAAT-box    | 1840           | 1845          | common cis-acting element in promoter and enhancer regions |
| <i>CsDof44</i> | TATA-box    | 27             | 31            | core promoter element around -30 of transcription start    |
| <i>CsDof44</i> | TATA-box    | 262            | 268           | core promoter element around -30 of transcription start    |
| <i>CsDof44</i> | TATA-box    | 263            | 269           | core promoter element around -30 of transcription start    |
| <i>CsDof44</i> | TATA-box    | 265            | 269           | core promoter element around -30 of transcription start    |
| <i>CsDof44</i> | TATA-box    | 321            | 325           | core promoter element around -30 of transcription start    |
| <i>CsDof44</i> | TATA-box    | 372            | 376           | core promoter element around -30 of transcription start    |
| <i>CsDof44</i> | TATA-box    | 379            | 383           | core promoter element around -30 of transcription start    |
| <i>CsDof44</i> | TATA-box    | 394            | 400           | core promoter element around -30 of transcription start    |
| <i>CsDof44</i> | TATA-box    | 395            | 400           | core promoter element around -30 of transcription start    |
| <i>CsDof44</i> | TATA-box    | 396            | 400           | core promoter element around -30 of transcription start    |
| <i>CsDof44</i> | TATA-box    | 409            | 413           | core promoter element around -30 of transcription start    |
| <i>CsDof44</i> | TATA-box    | 435            | 439           | core promoter element around -30 of transcription start    |
| <i>CsDof44</i> | TATA-box    | 532            | 539           | core promoter element around -30 of transcription start    |
| <i>CsDof44</i> | TATA-box    | 763            | 770           | core promoter element around -30 of transcription start    |
| <i>CsDof44</i> | TATA-box    | 869            | 873           | core promoter element around -30 of transcription start    |
| <i>CsDof44</i> | TATA-box    | 1100           | 1106          | core promoter element around -30 of transcription start    |
| <i>CsDof44</i> | TATA-box    | 1101           | 1107          | core promoter element around -30 of transcription start    |
| <i>CsDof44</i> | TATA-box    | 1102           | 1108          | core promoter element around -30 of transcription start    |
| <i>CsDof44</i> | TATA-box    | 1103           | 1107          | core promoter element around -30 of transcription start    |
| <i>CsDof44</i> | TATA-box    | 1110           | 1117          | core promoter element around -30 of transcription start    |
| <i>CsDof44</i> | TATA-box    | 1269           | 1276          | core promoter element around -30 of transcription start    |
| <i>CsDof44</i> | TATA-box    | 1291           | 1295          | core promoter element around -30 of transcription start    |
| <i>CsDof44</i> | TATA-box    | 1303           | 1310          | core promoter element around -30 of transcription start    |
| <i>CsDof44</i> | TATA-box    | 1368           | 1374          | core promoter element around -30 of transcription start    |
| <i>CsDof44</i> | TATA-box    | 1369           | 1374          | core promoter element around -30 of transcription start    |
| <i>CsDof44</i> | TATA-box    | 1370           | 1374          | core promoter element around -30 of transcription start    |
| <i>CsDof44</i> | TATA-box    | 1429           | 1435          | core promoter element around -30 of transcription start    |
| <i>CsDof44</i> | TATA-box    | 1430           | 1436          | core promoter element around -30 of transcription start    |
| <i>CsDof44</i> | TATA-box    | 1431           | 1437          | core promoter element around -30 of transcription start    |
| <i>CsDof44</i> | TATA-box    | 1432           | 1438          | core promoter element around -30 of transcription start    |
| <i>CsDof44</i> | TATA-box    | 1433           | 1439          | core promoter element around -30 of transcription start    |
| <i>CsDof44</i> | TATA-box    | 1434           | 1440          | core promoter element around -30 of transcription start    |
| <i>CsDof44</i> | TATA-box    | 1435           | 1441          | core promoter element around -30 of transcription start    |
| <i>CsDof44</i> | TATA-box    | 1436           | 1442          | core promoter element around -30 of transcription start    |
| <i>CsDof44</i> | TATA-box    | 1437           | 1443          | core promoter element around -30 of transcription start    |
| <i>CsDof44</i> | TATA-box    | 1438           | 1444          | core promoter element around -30 of transcription start    |
| <i>CsDof44</i> | TATA-box    | 1439           | 1445          | core promoter element around -30 of transcription start    |
| <i>CsDof44</i> | TATA-box    | 1440           | 1446          | core promoter element around -30 of transcription start    |
| <i>CsDof44</i> | TATA-box    | 1441           | 1447          | core promoter element around -30 of transcription start    |

| Name           | Cis-element     | Start position | Stop position | Function                                                            |
|----------------|-----------------|----------------|---------------|---------------------------------------------------------------------|
| <i>CsDof44</i> | TATA-box        | 1442           | 1454          | core promoter element around -30 of transcription start             |
| <i>CsDof44</i> | TATA-box        | 1443           | 1449          | core promoter element around -30 of transcription start             |
| <i>CsDof44</i> | TATA-box        | 1444           | 1450          | core promoter element around -30 of transcription start             |
| <i>CsDof44</i> | TATA-box        | 1445           | 1451          | core promoter element around -30 of transcription start             |
| <i>CsDof44</i> | TATA-box        | 1446           | 1452          | core promoter element around -30 of transcription start             |
| <i>CsDof44</i> | TATA-box        | 1447           | 1453          | core promoter element around -30 of transcription start             |
| <i>CsDof44</i> | TATA-box        | 1448           | 1452          | core promoter element around -30 of transcription start             |
| <i>CsDof44</i> | TATA-box        | 1537           | 1543          | core promoter element around -30 of transcription start             |
| <i>CsDof44</i> | TATA-box        | 1538           | 1544          | core promoter element around -30 of transcription start             |
| <i>CsDof44</i> | TATA-box        | 1539           | 1543          | core promoter element around -30 of transcription start             |
| <i>CsDof44</i> | TATA-box        | 1596           | 1600          | core promoter element around -30 of transcription start             |
| <i>CsDof44</i> | TATA-box        | 1609           | 1617          | core promoter element around -30 of transcription start             |
| <i>CsDof44</i> | TATA-box        | 1723           | 1729          | core promoter element around -30 of transcription start             |
| <i>CsDof44</i> | TATA-box        | 1724           | 1728          | core promoter element around -30 of transcription start             |
| <i>CsDof44</i> | TATA-box        | 1811           | 1817          | core promoter element around -30 of transcription start             |
| <i>CsDof44</i> | TATA-box        | 1812           | 1816          | core promoter element around -30 of transcription start             |
| <i>CsDof44</i> | TATA-box        | 1872           | 1878          | core promoter element around -30 of transcription start             |
| <i>CsDof44</i> | TATA-box        | 1873           | 1879          | core promoter element around -30 of transcription start             |
| <i>CsDof44</i> | TATA-box        | 1874           | 1880          | core promoter element around -30 of transcription start             |
| <i>CsDof44</i> | TATA-box        | 1876           | 1880          | core promoter element around -30 of transcription start             |
| <i>CsDof44</i> | GARE-motif      | 498            | 505           | gibberellin-responsive element                                      |
| <i>CsDof45</i> | TGA-element     | 569            | 575           | auxin-responsive element                                            |
| <i>CsDof45</i> | TC-rich repeats | 281            | 290           | cis-acting element involved in defense and stress responsiveness    |
| <i>CsDof45</i> | ARE             | 160            | 166           | cis-acting regulatory element essential for the anaerobic induction |
| <i>CsDof45</i> | ARE             | 584            | 590           | cis-acting regulatory element essential for the anaerobic induction |
| <i>CsDof45</i> | G-Box           | 393            | 403           | cis-acting regulatory element involved in light responsiveness      |
| <i>CsDof45</i> | CGTCA-motif     | 895            | 900           | cis-acting regulatory element involved in the MeJA-responsiveness   |
| <i>CsDof45</i> | TGACG-motif     | 895            | 900           | cis-acting regulatory element involved in the MeJA-responsiveness   |
| <i>CsDof45</i> | CAAT-box        | 121            | 126           | common cis-acting element in promoter and enhancer regions          |
| <i>CsDof45</i> | CAAT-box        | 158            | 163           | common cis-acting element in promoter and enhancer regions          |
| <i>CsDof45</i> | CAAT-box        | 185            | 190           | common cis-acting element in promoter and enhancer regions          |
| <i>CsDof45</i> | CAAT-box        | 210            | 215           | common cis-acting element in promoter and enhancer regions          |
| <i>CsDof45</i> | CAAT-box        | 278            | 283           | common cis-acting element in promoter and enhancer regions          |
| <i>CsDof45</i> | CAAT-box        | 322            | 327           | common cis-acting element in promoter and enhancer regions          |
| <i>CsDof45</i> | CAAT-box        | 679            | 684           | common cis-acting element in promoter and enhancer regions          |
| <i>CsDof45</i> | CAAT-box        | 883            | 888           | common cis-acting element in promoter and enhancer regions          |
| <i>CsDof45</i> | TATA-box        | 42             | 46            | core promoter element around -30 of transcription start             |
| <i>CsDof45</i> | TATA-box        | 134            | 142           | core promoter element around -30 of transcription start             |
| <i>CsDof45</i> | TATA-box        | 137            | 142           | core promoter element around -30 of transcription start             |
| <i>CsDof45</i> | TATA-box        | 138            | 142           | core promoter element around -30 of transcription start             |
| <i>CsDof45</i> | TATA-box        | 197            | 201           | core promoter element around -30 of transcription start             |
| <i>CsDof45</i> | TATA-box        | 315            | 320           | core promoter element around -30 of transcription start             |
| <i>CsDof45</i> | TATA-box        | 316            | 320           | core promoter element around -30 of transcription start             |
| <i>CsDof45</i> | TATA-box        | 327            | 334           | core promoter element around -30 of transcription start             |
| <i>CsDof45</i> | TATA-box        | 431            | 437           | core promoter element around -30 of transcription start             |
| <i>CsDof45</i> | TATA-box        | 432            | 436           | core promoter element around -30 of transcription start             |
| <i>CsDof45</i> | TATA-box        | 485            | 491           | core promoter element around -30 of transcription start             |
| <i>CsDof45</i> | TATA-box        | 486            | 490           | core promoter element around -30 of transcription start             |
| <i>CsDof45</i> | TATA-box        | 628            | 637           | core promoter element around -30 of transcription start             |
| <i>CsDof45</i> | TATA-box        | 629            | 636           | core promoter element around -30 of transcription start             |
| <i>CsDof45</i> | TATA-box        | 630            | 636           | core promoter element around -30 of transcription start             |



| Name           | Cis-element | Start position | Stop position | Function                                                            |
|----------------|-------------|----------------|---------------|---------------------------------------------------------------------|
| <i>CsDof45</i> | TATA-box    | 631            | 638           | core promoter element around -30 of transcription start             |
| <i>CsDof45</i> | TATA-box    | 632            | 638           | core promoter element around -30 of transcription start             |
| <i>CsDof45</i> | TATA-box    | 633            | 639           | core promoter element around -30 of transcription start             |
| <i>CsDof45</i> | TATA-box    | 634            | 638           | core promoter element around -30 of transcription start             |
| <i>CsDof45</i> | TATA-box    | 674            | 680           | core promoter element around -30 of transcription start             |
| <i>CsDof45</i> | TATA-box    | 676            | 680           | core promoter element around -30 of transcription start             |
| <i>CsDof45</i> | TATA-box    | 691            | 697           | core promoter element around -30 of transcription start             |
| <i>CsDof45</i> | TATA-box    | 692            | 698           | core promoter element around -30 of transcription start             |
| <i>CsDof45</i> | TATA-box    | 693            | 699           | core promoter element around -30 of transcription start             |
| <i>CsDof45</i> | TATA-box    | 694            | 698           | core promoter element around -30 of transcription start             |
| <i>CsDof45</i> | TATA-box    | 777            | 783           | core promoter element around -30 of transcription start             |
| <i>CsDof45</i> | TATA-box    | 778            | 783           | core promoter element around -30 of transcription start             |
| <i>CsDof45</i> | TATA-box    | 779            | 783           | core promoter element around -30 of transcription start             |
| <i>CsDof45</i> | TATA-box    | 789            | 795           | core promoter element around -30 of transcription start             |
| <i>CsDof45</i> | TATA-box    | 790            | 794           | core promoter element around -30 of transcription start             |
| <i>CsDof45</i> | MBS         | 143            | 149           | MYB binding site involved in drought-inducibility                   |
| <i>CsDof45</i> | MBS         | 508            | 514           | MYB binding site involved in drought-inducibility                   |
| <i>CsDof45</i> | MBS         | 526            | 532           | MYB binding site involved in drought-inducibility                   |
| <i>CsDof45</i> | MRE         | 24             | 31            | MYB binding site involved in light responsiveness                   |
| <i>CsDof46</i> | ABRE        | 66             | 71            | abscisic acid responsiveness                                        |
| <i>CsDof46</i> | ABRE        | 979            | 986           | abscisic acid responsiveness                                        |
| <i>CsDof46</i> | ABRE        | 1070           | 1079          | abscisic acid responsiveness                                        |
| <i>CsDof46</i> | ABRE        | 1073           | 1078          | abscisic acid responsiveness                                        |
| <i>CsDof46</i> | ABRE        | 1161           | 1166          | abscisic acid responsiveness                                        |
| <i>CsDof46</i> | TGA-element | 1005           | 1011          | auxin-responsive element                                            |
| <i>CsDof46</i> | TGA-element | 1393           | 1399          | auxin-responsive element                                            |
| <i>CsDof46</i> | TCA-element | 1983           | 1992          | cis-acting element involved in salicylic acid responsiveness        |
| <i>CsDof46</i> | ARE         | 1057           | 1063          | cis-acting regulatory element essential for the anaerobic induction |
| <i>CsDof46</i> | ARE         | 1348           | 1354          | cis-acting regulatory element essential for the anaerobic induction |
| <i>CsDof46</i> | ARE         | 1890           | 1896          | cis-acting regulatory element essential for the anaerobic induction |
| <i>CsDof46</i> | G-Box       | 65             | 71            | cis-acting regulatory element involved in light responsiveness      |
| <i>CsDof46</i> | G-Box       | 1072           | 1078          | cis-acting regulatory element involved in light responsiveness      |
| <i>CsDof46</i> | G-Box       | 1160           | 1166          | cis-acting regulatory element involved in light responsiveness      |
| <i>CsDof46</i> | CAAT-box    | 6              | 11            | common cis-acting element in promoter and enhancer regions          |
| <i>CsDof46</i> | CAAT-box    | 117            | 122           | common cis-acting element in promoter and enhancer regions          |
| <i>CsDof46</i> | CAAT-box    | 333            | 338           | common cis-acting element in promoter and enhancer regions          |
| <i>CsDof46</i> | CAAT-box    | 458            | 463           | common cis-acting element in promoter and enhancer regions          |
| <i>CsDof46</i> | CAAT-box    | 501            | 506           | common cis-acting element in promoter and enhancer regions          |
| <i>CsDof46</i> | CAAT-box    | 648            | 653           | common cis-acting element in promoter and enhancer regions          |
| <i>CsDof46</i> | CAAT-box    | 694            | 699           | common cis-acting element in promoter and enhancer regions          |
| <i>CsDof46</i> | CAAT-box    | 847            | 852           | common cis-acting element in promoter and enhancer regions          |
| <i>CsDof46</i> | CAAT-box    | 1420           | 1425          | common cis-acting element in promoter and enhancer regions          |
| <i>CsDof46</i> | CAAT-box    | 1478           | 1483          | common cis-acting element in promoter and enhancer regions          |
| <i>CsDof46</i> | CAAT-box    | 1711           | 1716          | common cis-acting element in promoter and enhancer regions          |
| <i>CsDof46</i> | TATA-box    | 155            | 159           | core promoter element around -30 of transcription start             |
| <i>CsDof46</i> | TATA-box    | 195            | 201           | core promoter element around -30 of transcription start             |
| <i>CsDof46</i> | TATA-box    | 196            | 201           | core promoter element around -30 of transcription start             |
| <i>CsDof46</i> | TATA-box    | 197            | 201           | core promoter element around -30 of transcription start             |
| <i>CsDof46</i> | TATA-box    | 245            | 253           | core promoter element around -30 of transcription start             |
| <i>CsDof46</i> | TATA-box    | 251            | 259           | core promoter element around -30 of transcription start             |
| <i>CsDof46</i> | TATA-box    | 253            | 261           | core promoter element around -30 of transcription start             |



| Name           | Cis-element     | Start position | Stop position | Function                                                             |
|----------------|-----------------|----------------|---------------|----------------------------------------------------------------------|
| <i>CsDof46</i> | TATA-box        | 1268           | 1272          | core promoter element around -30 of transcription start              |
| <i>CsDof46</i> | TATA-box        | 1321           | 1327          | core promoter element around -30 of transcription start              |
| <i>CsDof46</i> | TATA-box        | 1322           | 1327          | core promoter element around -30 of transcription start              |
| <i>CsDof46</i> | TATA-box        | 1323           | 1327          | core promoter element around -30 of transcription start              |
| <i>CsDof46</i> | TATA-box        | 1542           | 1547          | core promoter element around -30 of transcription start              |
| <i>CsDof46</i> | TATA-box        | 1543           | 1547          | core promoter element around -30 of transcription start              |
| <i>CsDof46</i> | TATA-box        | 1554           | 1561          | core promoter element around -30 of transcription start              |
| <i>CsDof46</i> | TATA-box        | 1555           | 1561          | core promoter element around -30 of transcription start              |
| <i>CsDof46</i> | TATA-box        | 1556           | 1561          | core promoter element around -30 of transcription start              |
| <i>CsDof46</i> | TATA-box        | 1557           | 1561          | core promoter element around -30 of transcription start              |
| <i>CsDof46</i> | TATA-box        | 1717           | 1726          | core promoter element around -30 of transcription start              |
| <i>CsDof46</i> | TATA-box        | 1719           | 1723          | core promoter element around -30 of transcription start              |
| <i>CsDof46</i> | TATA-box        | 1957           | 1961          | core promoter element around -30 of transcription start              |
| <i>CsDof46</i> | GT1-motif       | 1010           | 1016          | light responsive element                                             |
| <i>CsDof46</i> | GT1-motif       | 1707           | 1713          | light responsive element                                             |
| <i>CsDof46</i> | GT1-motif       | 1785           | 1792          | light responsive element                                             |
| <i>CsDof46</i> | GT1-motif       | 1786           | 1792          | light responsive element                                             |
| <i>CsDof46</i> | 4cl-CMA1b       | 201            | 213           | light responsive element                                             |
| <i>CsDof46</i> | CCAAT-box       | 1354           | 1360          | MYBHv1 binding site                                                  |
| <i>CsDof47</i> | ABRE            | 1895           | 1901          | abscisic acid responsiveness                                         |
| <i>CsDof47</i> | ABRE            | 1896           | 1901          | abscisic acid responsiveness                                         |
| <i>CsDof47</i> | TC-rich repeats | 89             | 98            | cis-acting element involved in defense and stress responsiveness     |
| <i>CsDof47</i> | TC-rich repeats | 1115           | 1124          | cis-acting element involved in defense and stress responsiveness     |
| <i>CsDof47</i> | LTR             | 40             | 46            | cis-acting element involved in low-temperature responsiveness        |
| <i>CsDof47</i> | ARE             | 1090           | 1096          | cis-acting regulatory element essential for the anaerobic induction  |
| <i>CsDof47</i> | G-box           | 1403           | 1409          | cis-acting regulatory element involved in light responsiveness       |
| <i>CsDof47</i> | G-box           | 1894           | 1903          | cis-acting regulatory element involved in light responsiveness       |
| <i>CsDof47</i> | G-box           | 1895           | 1901          | cis-acting regulatory element involved in light responsiveness       |
| <i>CsDof47</i> | G-Box           | 1895           | 1901          | cis-acting regulatory element involved in light responsiveness       |
| <i>CsDof47</i> | RY-element      | 1943           | 1951          | cis-acting regulatory element involved in seed-specific regulation   |
| <i>CsDof47</i> | CGTCA-motif     | 887            | 892           | cis-acting regulatory element involved in the MeJA-responsiveness    |
| <i>CsDof47</i> | TGACG-motif     | 887            | 892           | cis-acting regulatory element involved in the MeJA-responsiveness    |
| <i>CsDof47</i> | O2-site         | 666            | 674           | cis-acting regulatory element involved in zein metabolism regulation |
| <i>CsDof47</i> | CAT-box         | 455            | 461           | cis-acting regulatory element related to meristem expression         |
| <i>CsDof47</i> | CAAT-box        | 150            | 155           | common cis-acting element in promoter and enhancer regions           |
| <i>CsDof47</i> | CAAT-box        | 469            | 474           | common cis-acting element in promoter and enhancer regions           |
| <i>CsDof47</i> | CAAT-box        | 731            | 736           | common cis-acting element in promoter and enhancer regions           |
| <i>CsDof47</i> | CAAT-box        | 1301           | 1306          | common cis-acting element in promoter and enhancer regions           |
| <i>CsDof47</i> | CAAT-box        | 1479           | 1484          | common cis-acting element in promoter and enhancer regions           |
| <i>CsDof47</i> | CAAT-box        | 1521           | 1526          | common cis-acting element in promoter and enhancer regions           |
| <i>CsDof47</i> | CAAT-box        | 1641           | 1646          | common cis-acting element in promoter and enhancer regions           |
| <i>CsDof47</i> | CAAT-box        | 1660           | 1665          | common cis-acting element in promoter and enhancer regions           |
| <i>CsDof47</i> | CAAT-box        | 1860           | 1865          | common cis-acting element in promoter and enhancer regions           |
| <i>CsDof47</i> | TATA-box        | 34             | 40            | core promoter element around -30 of transcription start              |
| <i>CsDof47</i> | TATA-box        | 35             | 39            | core promoter element around -30 of transcription start              |
| <i>CsDof47</i> | TATA-box        | 128            | 134           | core promoter element around -30 of transcription start              |
| <i>CsDof47</i> | TATA-box        | 129            | 135           | core promoter element around -30 of transcription start              |
| <i>CsDof47</i> | TATA-box        | 131            | 135           | core promoter element around -30 of transcription start              |
| <i>CsDof47</i> | TATA-box        | 477            | 484           | core promoter element around -30 of transcription start              |
| <i>CsDof47</i> | TATA-box        | 490            | 496           | core promoter element around -30 of transcription start              |
| <i>CsDof47</i> | TATA-box        | 491            | 495           | core promoter element around -30 of transcription start              |

| Name           | Cis-element     | Start position | Stop position | Function                                                            |
|----------------|-----------------|----------------|---------------|---------------------------------------------------------------------|
| <i>CsDof47</i> | TATA-box        | 939            | 943           | core promoter element around -30 of transcription start             |
| <i>CsDof47</i> | TATA-box        | 1001           | 1006          | core promoter element around -30 of transcription start             |
| <i>CsDof47</i> | TATA-box        | 1002           | 1006          | core promoter element around -30 of transcription start             |
| <i>CsDof47</i> | TATA-box        | 1137           | 1146          | core promoter element around -30 of transcription start             |
| <i>CsDof47</i> | TATA-box        | 1138           | 1145          | core promoter element around -30 of transcription start             |
| <i>CsDof47</i> | TATA-box        | 1139           | 1145          | core promoter element around -30 of transcription start             |
| <i>CsDof47</i> | TATA-box        | 1140           | 1145          | core promoter element around -30 of transcription start             |
| <i>CsDof47</i> | TATA-box        | 1141           | 1145          | core promoter element around -30 of transcription start             |
| <i>CsDof47</i> | TATA-box        | 1297           | 1301          | core promoter element around -30 of transcription start             |
| <i>CsDof47</i> | TATA-box        | 1410           | 1416          | core promoter element around -30 of transcription start             |
| <i>CsDof47</i> | TATA-box        | 1411           | 1415          | core promoter element around -30 of transcription start             |
| <i>CsDof47</i> | TATA-box        | 1526           | 1532          | core promoter element around -30 of transcription start             |
| <i>CsDof47</i> | TATA-box        | 1527           | 1531          | core promoter element around -30 of transcription start             |
| <i>CsDof47</i> | TATA-box        | 1771           | 1775          | core promoter element around -30 of transcription start             |
| <i>CsDof47</i> | TATA-box        | 1779           | 1787          | core promoter element around -30 of transcription start             |
| <i>CsDof47</i> | TATA-box        | 1781           | 1789          | core promoter element around -30 of transcription start             |
| <i>CsDof47</i> | TATA-box        | 1953           | 1959          | core promoter element around -30 of transcription start             |
| <i>CsDof47</i> | TATA-box        | 1954           | 1960          | core promoter element around -30 of transcription start             |
| <i>CsDof47</i> | TATA-box        | 1955           | 1959          | core promoter element around -30 of transcription start             |
| <i>CsDof47</i> | P-box           | 390            | 397           | gibberellin-responsive element                                      |
| <i>CsDof47</i> | GT1-motif       | 1731           | 1738          | light responsive element                                            |
| <i>CsDof47</i> | GT1-motif       | 1732           | 1738          | light responsive element                                            |
| <i>CsDof47</i> | GT1-motif       | 1811           | 1817          | light responsive element                                            |
| <i>CsDof47</i> | CCAAT-box       | 73             | 79            | MYBHv1 binding site                                                 |
| <i>CsDof48</i> | TGA-element     | 1267           | 1273          | auxin-responsive element                                            |
| <i>CsDof48</i> | TGA-element     | 1302           | 1308          | auxin-responsive element                                            |
| <i>CsDof48</i> | TC-rich repeats | 1246           | 1255          | cis-acting element involved in defense and stress responsiveness    |
| <i>CsDof48</i> | ACE             | 190            | 199           | cis-acting element involved in light responsiveness                 |
| <i>CsDof48</i> | ARE             | 774            | 780           | cis-acting regulatory element essential for the anaerobic induction |
| <i>CsDof48</i> | ARE             | 1988           | 1994          | cis-acting regulatory element essential for the anaerobic induction |
| <i>CsDof48</i> | AuxRR-core      | 303            | 310           | cis-acting regulatory element involved in auxin responsiveness      |
| <i>CsDof48</i> | TGACG-motif     | 889            | 894           | cis-acting regulatory element involved in the MeJA-responsiveness   |
| <i>CsDof48</i> | TGACG-motif     | 1636           | 1641          | cis-acting regulatory element involved in the MeJA-responsiveness   |
| <i>CsDof48</i> | CGTCA-motif     | 889            | 894           | cis-acting regulatory element involved in the MeJA-responsiveness   |
| <i>CsDof48</i> | CGTCA-motif     | 1636           | 1641          | cis-acting regulatory element involved in the MeJA-responsiveness   |
| <i>CsDof48</i> | CAAT-box        | 47             | 52            | common cis-acting element in promoter and enhancer regions          |
| <i>CsDof48</i> | CAAT-box        | 64             | 69            | common cis-acting element in promoter and enhancer regions          |
| <i>CsDof48</i> | CAAT-box        | 71             | 76            | common cis-acting element in promoter and enhancer regions          |
| <i>CsDof48</i> | CAAT-box        | 327            | 332           | common cis-acting element in promoter and enhancer regions          |
| <i>CsDof48</i> | CAAT-box        | 339            | 344           | common cis-acting element in promoter and enhancer regions          |
| <i>CsDof48</i> | CAAT-box        | 349            | 354           | common cis-acting element in promoter and enhancer regions          |
| <i>CsDof48</i> | CAAT-box        | 440            | 445           | common cis-acting element in promoter and enhancer regions          |
| <i>CsDof48</i> | CAAT-box        | 459            | 464           | common cis-acting element in promoter and enhancer regions          |
| <i>CsDof48</i> | CAAT-box        | 604            | 609           | common cis-acting element in promoter and enhancer regions          |
| <i>CsDof48</i> | CAAT-box        | 609            | 614           | common cis-acting element in promoter and enhancer regions          |
| <i>CsDof48</i> | CAAT-box        | 656            | 661           | common cis-acting element in promoter and enhancer regions          |
| <i>CsDof48</i> | CAAT-box        | 665            | 670           | common cis-acting element in promoter and enhancer regions          |
| <i>CsDof48</i> | CAAT-box        | 732            | 737           | common cis-acting element in promoter and enhancer regions          |
| <i>CsDof48</i> | CAAT-box        | 765            | 770           | common cis-acting element in promoter and enhancer regions          |
| <i>CsDof48</i> | CAAT-box        | 1010           | 1015          | common cis-acting element in promoter and enhancer regions          |
| <i>CsDof48</i> | CAAT-box        | 1023           | 1028          | common cis-acting element in promoter and enhancer regions          |

| Name           | Cis-element | Start position | Stop position | Function                                                   |
|----------------|-------------|----------------|---------------|------------------------------------------------------------|
| <i>CsDof48</i> | CAAT-box    | 1044           | 1049          | common cis-acting element in promoter and enhancer regions |
| <i>CsDof48</i> | CAAT-box    | 1541           | 1546          | common cis-acting element in promoter and enhancer regions |
| <i>CsDof48</i> | CAAT-box    | 1585           | 1590          | common cis-acting element in promoter and enhancer regions |
| <i>CsDof48</i> | TATA-box    | 131            | 138           | core promoter element around -30 of transcription start    |
| <i>CsDof48</i> | TATA-box    | 132            | 138           | core promoter element around -30 of transcription start    |
| <i>CsDof48</i> | TATA-box    | 133            | 138           | core promoter element around -30 of transcription start    |
| <i>CsDof48</i> | TATA-box    | 134            | 138           | core promoter element around -30 of transcription start    |
| <i>CsDof48</i> | TATA-box    | 181            | 186           | core promoter element around -30 of transcription start    |
| <i>CsDof48</i> | TATA-box    | 182            | 186           | core promoter element around -30 of transcription start    |
| <i>CsDof48</i> | TATA-box    | 200            | 204           | core promoter element around -30 of transcription start    |
| <i>CsDof48</i> | TATA-box    | 239            | 248           | core promoter element around -30 of transcription start    |
| <i>CsDof48</i> | TATA-box    | 331            | 335           | core promoter element around -30 of transcription start    |
| <i>CsDof48</i> | TATA-box    | 467            | 471           | core promoter element around -30 of transcription start    |
| <i>CsDof48</i> | TATA-box    | 496            | 502           | core promoter element around -30 of transcription start    |
| <i>CsDof48</i> | TATA-box    | 497            | 501           | core promoter element around -30 of transcription start    |
| <i>CsDof48</i> | TATA-box    | 532            | 537           | core promoter element around -30 of transcription start    |
| <i>CsDof48</i> | TATA-box    | 533            | 537           | core promoter element around -30 of transcription start    |
| <i>CsDof48</i> | TATA-box    | 622            | 628           | core promoter element around -30 of transcription start    |
| <i>CsDof48</i> | TATA-box    | 623            | 628           | core promoter element around -30 of transcription start    |
| <i>CsDof48</i> | TATA-box    | 624            | 628           | core promoter element around -30 of transcription start    |
| <i>CsDof48</i> | TATA-box    | 676            | 682           | core promoter element around -30 of transcription start    |
| <i>CsDof48</i> | TATA-box    | 677            | 682           | core promoter element around -30 of transcription start    |
| <i>CsDof48</i> | TATA-box    | 678            | 682           | core promoter element around -30 of transcription start    |
| <i>CsDof48</i> | TATA-box    | 745            | 751           | core promoter element around -30 of transcription start    |
| <i>CsDof48</i> | TATA-box    | 746            | 750           | core promoter element around -30 of transcription start    |
| <i>CsDof48</i> | TATA-box    | 761            | 767           | core promoter element around -30 of transcription start    |
| <i>CsDof48</i> | TATA-box    | 762            | 766           | core promoter element around -30 of transcription start    |
| <i>CsDof48</i> | TATA-box    | 780            | 784           | core promoter element around -30 of transcription start    |
| <i>CsDof48</i> | TATA-box    | 836            | 840           | core promoter element around -30 of transcription start    |
| <i>CsDof48</i> | TATA-box    | 866            | 875           | core promoter element around -30 of transcription start    |
| <i>CsDof48</i> | TATA-box    | 867            | 874           | core promoter element around -30 of transcription start    |
| <i>CsDof48</i> | TATA-box    | 868            | 874           | core promoter element around -30 of transcription start    |
| <i>CsDof48</i> | TATA-box    | 869            | 874           | core promoter element around -30 of transcription start    |
| <i>CsDof48</i> | TATA-box    | 870            | 874           | core promoter element around -30 of transcription start    |
| <i>CsDof48</i> | TATA-box    | 898            | 904           | core promoter element around -30 of transcription start    |
| <i>CsDof48</i> | TATA-box    | 899            | 904           | core promoter element around -30 of transcription start    |
| <i>CsDof48</i> | TATA-box    | 900            | 904           | core promoter element around -30 of transcription start    |
| <i>CsDof48</i> | TATA-box    | 1059           | 1066          | core promoter element around -30 of transcription start    |
| <i>CsDof48</i> | TATA-box    | 1060           | 1066          | core promoter element around -30 of transcription start    |
| <i>CsDof48</i> | TATA-box    | 1061           | 1068          | core promoter element around -30 of transcription start    |
| <i>CsDof48</i> | TATA-box    | 1062           | 1068          | core promoter element around -30 of transcription start    |
| <i>CsDof48</i> | TATA-box    | 1063           | 1069          | core promoter element around -30 of transcription start    |
| <i>CsDof48</i> | TATA-box    | 1064           | 1070          | core promoter element around -30 of transcription start    |
| <i>CsDof48</i> | TATA-box    | 1065           | 1071          | core promoter element around -30 of transcription start    |
| <i>CsDof48</i> | TATA-box    | 1066           | 1070          | core promoter element around -30 of transcription start    |
| <i>CsDof48</i> | TATA-box    | 1256           | 1260          | core promoter element around -30 of transcription start    |
| <i>CsDof48</i> | TATA-box    | 1287           | 1293          | core promoter element around -30 of transcription start    |
| <i>CsDof48</i> | TATA-box    | 1288           | 1293          | core promoter element around -30 of transcription start    |
| <i>CsDof48</i> | TATA-box    | 1289           | 1293          | core promoter element around -30 of transcription start    |
| <i>CsDof48</i> | TATA-box    | 1322           | 1328          | core promoter element around -30 of transcription start    |
| <i>CsDof48</i> | TATA-box    | 1323           | 1327          | core promoter element around -30 of transcription start    |

| Name           | Cis-element | Start position | Stop position | Function                                                |
|----------------|-------------|----------------|---------------|---------------------------------------------------------|
| <i>CsDof48</i> | TATA-box    | 1424           | 1428          | core promoter element around -30 of transcription start |
| <i>CsDof48</i> | TATA-box    | 1439           | 1445          | core promoter element around -30 of transcription start |
| <i>CsDof48</i> | TATA-box    | 1440           | 1445          | core promoter element around -30 of transcription start |
| <i>CsDof48</i> | TATA-box    | 1441           | 1445          | core promoter element around -30 of transcription start |
| <i>CsDof48</i> | TATA-box    | 1447           | 1453          | core promoter element around -30 of transcription start |
| <i>CsDof48</i> | TATA-box    | 1448           | 1453          | core promoter element around -30 of transcription start |
| <i>CsDof48</i> | TATA-box    | 1449           | 1453          | core promoter element around -30 of transcription start |
| <i>CsDof48</i> | TATA-box    | 1458           | 1464          | core promoter element around -30 of transcription start |
| <i>CsDof48</i> | TATA-box    | 1460           | 1466          | core promoter element around -30 of transcription start |
| <i>CsDof48</i> | TATA-box    | 1461           | 1467          | core promoter element around -30 of transcription start |
| <i>CsDof48</i> | TATA-box    | 1462           | 1468          | core promoter element around -30 of transcription start |
| <i>CsDof48</i> | TATA-box    | 1463           | 1469          | core promoter element around -30 of transcription start |
| <i>CsDof48</i> | TATA-box    | 1464           | 1470          | core promoter element around -30 of transcription start |
| <i>CsDof48</i> | TATA-box    | 1465           | 1471          | core promoter element around -30 of transcription start |
| <i>CsDof48</i> | TATA-box    | 1466           | 1472          | core promoter element around -30 of transcription start |
| <i>CsDof48</i> | TATA-box    | 1467           | 1473          | core promoter element around -30 of transcription start |
| <i>CsDof48</i> | TATA-box    | 1468           | 1474          | core promoter element around -30 of transcription start |
| <i>CsDof48</i> | TATA-box    | 1469           | 1475          | core promoter element around -30 of transcription start |
| <i>CsDof48</i> | TATA-box    | 1470           | 1476          | core promoter element around -30 of transcription start |
| <i>CsDof48</i> | TATA-box    | 1471           | 1477          | core promoter element around -30 of transcription start |
| <i>CsDof48</i> | TATA-box    | 1472           | 1478          | core promoter element around -30 of transcription start |
| <i>CsDof48</i> | TATA-box    | 1473           | 1479          | core promoter element around -30 of transcription start |
| <i>CsDof48</i> | TATA-box    | 1474           | 1480          | core promoter element around -30 of transcription start |
| <i>CsDof48</i> | TATA-box    | 1475           | 1481          | core promoter element around -30 of transcription start |
| <i>CsDof48</i> | TATA-box    | 1476           | 1482          | core promoter element around -30 of transcription start |
| <i>CsDof48</i> | TATA-box    | 1477           | 1483          | core promoter element around -30 of transcription start |
| <i>CsDof48</i> | TATA-box    | 1478           | 1482          | core promoter element around -30 of transcription start |
| <i>CsDof48</i> | TATA-box    | 1513           | 1519          | core promoter element around -30 of transcription start |
| <i>CsDof48</i> | TATA-box    | 1514           | 1518          | core promoter element around -30 of transcription start |
| <i>CsDof48</i> | TATA-box    | 1520           | 1526          | core promoter element around -30 of transcription start |
| <i>CsDof48</i> | TATA-box    | 1521           | 1526          | core promoter element around -30 of transcription start |
| <i>CsDof48</i> | TATA-box    | 1522           | 1526          | core promoter element around -30 of transcription start |
| <i>CsDof48</i> | TATA-box    | 1547           | 1552          | core promoter element around -30 of transcription start |
| <i>CsDof48</i> | TATA-box    | 1548           | 1552          | core promoter element around -30 of transcription start |
| <i>CsDof48</i> | TATA-box    | 1575           | 1581          | core promoter element around -30 of transcription start |
| <i>CsDof48</i> | TATA-box    | 1576           | 1580          | core promoter element around -30 of transcription start |
| <i>CsDof48</i> | TATA-box    | 1598           | 1607          | core promoter element around -30 of transcription start |
| <i>CsDof48</i> | TATA-box    | 1599           | 1605          | core promoter element around -30 of transcription start |
| <i>CsDof48</i> | TATA-box    | 1600           | 1606          | core promoter element around -30 of transcription start |
| <i>CsDof48</i> | TATA-box    | 1601           | 1607          | core promoter element around -30 of transcription start |
| <i>CsDof48</i> | TATA-box    | 1602           | 1608          | core promoter element around -30 of transcription start |
| <i>CsDof48</i> | TATA-box    | 1603           | 1609          | core promoter element around -30 of transcription start |
| <i>CsDof48</i> | TATA-box    | 1604           | 1610          | core promoter element around -30 of transcription start |
| <i>CsDof48</i> | TATA-box    | 1606           | 1610          | core promoter element around -30 of transcription start |
| <i>CsDof48</i> | TATA-box    | 1971           | 1980          | core promoter element around -30 of transcription start |
| <i>CsDof48</i> | GT1-motif   | 1712           | 1718          | light responsive element                                |
| <i>CsDof48</i> | Box III     | 1551           | 1562          | protein binding site                                    |
| <i>CsDof49</i> | ABRE        | 584            | 593           | abscisic acid responsiveness                            |
| <i>CsDof49</i> | ABRE        | 586            | 592           | abscisic acid responsiveness                            |
| <i>CsDof49</i> | ABRE        | 587            | 592           | abscisic acid responsiveness                            |
| <i>CsDof49</i> | ABRE        | 836            | 844           | abscisic acid responsiveness                            |

| Name           | Cis-element | Start position | Stop position | Function                                                            |
|----------------|-------------|----------------|---------------|---------------------------------------------------------------------|
| <i>CsDof49</i> | ABRE        | 838            | 843           | abscisic acid responsiveness                                        |
| <i>CsDof49</i> | ABRE        | 1268           | 1273          | abscisic acid responsiveness                                        |
| <i>CsDof49</i> | TGA-element | 591            | 597           | auxin-responsive element                                            |
| <i>CsDof49</i> | LTR         | 944            | 950           | cis-acting element involved in low-temperature responsiveness       |
| <i>CsDof49</i> | TCA-element | 318            | 327           | cis-acting element involved in salicylic acid responsiveness        |
| <i>CsDof49</i> | TCA-element | 864            | 873           | cis-acting element involved in salicylic acid responsiveness        |
| <i>CsDof49</i> | TCA-element | 1895           | 1904          | cis-acting element involved in salicylic acid responsiveness        |
| <i>CsDof49</i> | A-box       | 409            | 415           | cis-acting regulatory element                                       |
| <i>CsDof49</i> | A-box       | 1422           | 1428          | cis-acting regulatory element                                       |
| <i>CsDof49</i> | ARE         | 1686           | 1692          | cis-acting regulatory element essential for the anaerobic induction |
| <i>CsDof49</i> | G-box       | 585            | 593           | cis-acting regulatory element involved in light responsiveness      |
| <i>CsDof49</i> | G-box       | 586            | 592           | cis-acting regulatory element involved in light responsiveness      |
| <i>CsDof49</i> | G-box       | 838            | 844           | cis-acting regulatory element involved in light responsiveness      |
| <i>CsDof49</i> | G-Box       | 586            | 592           | cis-acting regulatory element involved in light responsiveness      |
| <i>CsDof49</i> | G-Box       | 1268           | 1274          | cis-acting regulatory element involved in light responsiveness      |
| <i>CsDof49</i> | TGACG-motif | 183            | 188           | cis-acting regulatory element involved in the MeJA-responsiveness   |
| <i>CsDof49</i> | TGACG-motif | 670            | 675           | cis-acting regulatory element involved in the MeJA-responsiveness   |
| <i>CsDof49</i> | TGACG-motif | 708            | 713           | cis-acting regulatory element involved in the MeJA-responsiveness   |
| <i>CsDof49</i> | TGACG-motif | 1179           | 1184          | cis-acting regulatory element involved in the MeJA-responsiveness   |
| <i>CsDof49</i> | TGACG-motif | 1182           | 1187          | cis-acting regulatory element involved in the MeJA-responsiveness   |
| <i>CsDof49</i> | CGTCA-motif | 183            | 188           | cis-acting regulatory element involved in the MeJA-responsiveness   |
| <i>CsDof49</i> | CGTCA-motif | 670            | 675           | cis-acting regulatory element involved in the MeJA-responsiveness   |
| <i>CsDof49</i> | CGTCA-motif | 708            | 713           | cis-acting regulatory element involved in the MeJA-responsiveness   |
| <i>CsDof49</i> | CGTCA-motif | 1179           | 1184          | cis-acting regulatory element involved in the MeJA-responsiveness   |
| <i>CsDof49</i> | CGTCA-motif | 1182           | 1187          | cis-acting regulatory element involved in the MeJA-responsiveness   |
| <i>CsDof49</i> | CAT-box     | 1143           | 1149          | cis-acting regulatory element related to meristem expression        |
| <i>CsDof49</i> | CAAT-box    | 149            | 154           | common cis-acting element in promoter and enhancer regions          |
| <i>CsDof49</i> | CAAT-box    | 168            | 173           | common cis-acting element in promoter and enhancer regions          |
| <i>CsDof49</i> | CAAT-box    | 429            | 434           | common cis-acting element in promoter and enhancer regions          |
| <i>CsDof49</i> | CAAT-box    | 569            | 574           | common cis-acting element in promoter and enhancer regions          |
| <i>CsDof49</i> | CAAT-box    | 612            | 617           | common cis-acting element in promoter and enhancer regions          |
| <i>CsDof49</i> | CAAT-box    | 664            | 669           | common cis-acting element in promoter and enhancer regions          |
| <i>CsDof49</i> | CAAT-box    | 986            | 991           | common cis-acting element in promoter and enhancer regions          |
| <i>CsDof49</i> | CAAT-box    | 1131           | 1136          | common cis-acting element in promoter and enhancer regions          |
| <i>CsDof49</i> | CAAT-box    | 1251           | 1256          | common cis-acting element in promoter and enhancer regions          |
| <i>CsDof49</i> | CAAT-box    | 1631           | 1636          | common cis-acting element in promoter and enhancer regions          |
| <i>CsDof49</i> | CAAT-box    | 1799           | 1804          | common cis-acting element in promoter and enhancer regions          |
| <i>CsDof49</i> | CAAT-box    | 1982           | 1992          | common cis-acting element in promoter and enhancer regions          |
| <i>CsDof49</i> | TATA-box    | 45             | 49            | core promoter element around -30 of transcription start             |
| <i>CsDof49</i> | TATA-box    | 114            | 118           | core promoter element around -30 of transcription start             |
| <i>CsDof49</i> | TATA-box    | 119            | 125           | core promoter element around -30 of transcription start             |
| <i>CsDof49</i> | TATA-box    | 120            | 126           | core promoter element around -30 of transcription start             |
| <i>CsDof49</i> | TATA-box    | 121            | 125           | core promoter element around -30 of transcription start             |
| <i>CsDof49</i> | TATA-box    | 144            | 150           | core promoter element around -30 of transcription start             |
| <i>CsDof49</i> | TATA-box    | 145            | 150           | core promoter element around -30 of transcription start             |
| <i>CsDof49</i> | TATA-box    | 146            | 150           | core promoter element around -30 of transcription start             |
| <i>CsDof49</i> | TATA-box    | 333            | 337           | core promoter element around -30 of transcription start             |
| <i>CsDof49</i> | TATA-box    | 625            | 631           | core promoter element around -30 of transcription start             |
| <i>CsDof49</i> | TATA-box    | 627            | 633           | core promoter element around -30 of transcription start             |
| <i>CsDof49</i> | TATA-box    | 628            | 634           | core promoter element around -30 of transcription start             |
| <i>CsDof49</i> | TATA-box    | 629            | 633           | core promoter element around -30 of transcription start             |

| Name           | Cis-element     | Start position | Stop position | Function                                                              |
|----------------|-----------------|----------------|---------------|-----------------------------------------------------------------------|
| <i>CsDof49</i> | TATA-box        | 994            | 998           | core promoter element around -30 of transcription start               |
| <i>CsDof49</i> | TATA-box        | 1008           | 1014          | core promoter element around -30 of transcription start               |
| <i>CsDof49</i> | TATA-box        | 1009           | 1015          | core promoter element around -30 of transcription start               |
| <i>CsDof49</i> | TATA-box        | 1011           | 1015          | core promoter element around -30 of transcription start               |
| <i>CsDof49</i> | TATA-box        | 1063           | 1068          | core promoter element around -30 of transcription start               |
| <i>CsDof49</i> | TATA-box        | 1064           | 1068          | core promoter element around -30 of transcription start               |
| <i>CsDof49</i> | TATA-box        | 1214           | 1222          | core promoter element around -30 of transcription start               |
| <i>CsDof49</i> | TATA-box        | 1217           | 1224          | core promoter element around -30 of transcription start               |
| <i>CsDof49</i> | TATA-box        | 1218           | 1224          | core promoter element around -30 of transcription start               |
| <i>CsDof49</i> | TATA-box        | 1219           | 1225          | core promoter element around -30 of transcription start               |
| <i>CsDof49</i> | TATA-box        | 1220           | 1224          | core promoter element around -30 of transcription start               |
| <i>CsDof49</i> | TATA-box        | 1257           | 1263          | core promoter element around -30 of transcription start               |
| <i>CsDof49</i> | TATA-box        | 1258           | 1264          | core promoter element around -30 of transcription start               |
| <i>CsDof49</i> | TATA-box        | 1259           | 1265          | core promoter element around -30 of transcription start               |
| <i>CsDof49</i> | TATA-box        | 1260           | 1264          | core promoter element around -30 of transcription start               |
| <i>CsDof49</i> | TATA-box        | 1283           | 1287          | core promoter element around -30 of transcription start               |
| <i>CsDof49</i> | TATA-box        | 1322           | 1328          | core promoter element around -30 of transcription start               |
| <i>CsDof49</i> | TATA-box        | 1323           | 1328          | core promoter element around -30 of transcription start               |
| <i>CsDof49</i> | TATA-box        | 1324           | 1328          | core promoter element around -30 of transcription start               |
| <i>CsDof49</i> | TATA-box        | 1576           | 1582          | core promoter element around -30 of transcription start               |
| <i>CsDof49</i> | TATA-box        | 1578           | 1582          | core promoter element around -30 of transcription start               |
| <i>CsDof49</i> | TATA-box        | 1600           | 1612          | core promoter element around -30 of transcription start               |
| <i>CsDof49</i> | TATA-box        | 1603           | 1607          | core promoter element around -30 of transcription start               |
| <i>CsDof49</i> | TATA-box        | 1608           | 1614          | core promoter element around -30 of transcription start               |
| <i>CsDof49</i> | TATA-box        | 1609           | 1613          | core promoter element around -30 of transcription start               |
| <i>CsDof49</i> | TATA-box        | 1636           | 1645          | core promoter element around -30 of transcription start               |
| <i>CsDof49</i> | TATA-box        | 1637           | 1644          | core promoter element around -30 of transcription start               |
| <i>CsDof49</i> | TATA-box        | 1638           | 1644          | core promoter element around -30 of transcription start               |
| <i>CsDof49</i> | TATA-box        | 1639           | 1646          | core promoter element around -30 of transcription start               |
| <i>CsDof49</i> | TATA-box        | 1640           | 1646          | core promoter element around -30 of transcription start               |
| <i>CsDof49</i> | TATA-box        | 1641           | 1647          | core promoter element around -30 of transcription start               |
| <i>CsDof49</i> | TATA-box        | 1642           | 1646          | core promoter element around -30 of transcription start               |
| <i>CsDof49</i> | TATA-box        | 1839           | 1845          | core promoter element around -30 of transcription start               |
| <i>CsDof49</i> | TATA-box        | 1840           | 1846          | core promoter element around -30 of transcription start               |
| <i>CsDof49</i> | TATA-box        | 1841           | 1847          | core promoter element around -30 of transcription start               |
| <i>CsDof49</i> | TATA-box        | 1842           | 1848          | core promoter element around -30 of transcription start               |
| <i>CsDof49</i> | TATA-box        | 1843           | 1849          | core promoter element around -30 of transcription start               |
| <i>CsDof49</i> | TATA-box        | 1845           | 1849          | core promoter element around -30 of transcription start               |
| <i>CsDof49</i> | GC-motif        | 1428           | 1434          | enhancer-like element involved in anoxic specific inducibility        |
| <i>CsDof49</i> | P-box           | 1980           | 1992          | gibberellin-responsive element and part of a light responsive element |
| <i>CsDof49</i> | GT1-motif       | 1090           | 1097          | light responsive element                                              |
| <i>CsDof49</i> | CCAAT-box       | 734            | 740           | MYBHv1 binding site                                                   |
| <i>CsDof50</i> | ABRE            | 7              | 14            | abscisic acid responsiveness                                          |
| <i>CsDof50</i> | AT-rich element | 1934           | 1944          | binding site of AT-rich DNA binding protein (ATBP-1)                  |
| <i>CsDof50</i> | ARE             | 257            | 263           | cis-acting regulatory element essential for the anaerobic induction   |
| <i>CsDof50</i> | ARE             | 746            | 752           | cis-acting regulatory element essential for the anaerobic induction   |
| <i>CsDof50</i> | TGACG-motif     | 630            | 635           | cis-acting regulatory element involved in the MeJA-responsiveness     |
| <i>CsDof50</i> | TGACG-motif     | 1899           | 1904          | cis-acting regulatory element involved in the MeJA-responsiveness     |
| <i>CsDof50</i> | CGTCA-motif     | 630            | 635           | cis-acting regulatory element involved in the MeJA-responsiveness     |
| <i>CsDof50</i> | CGTCA-motif     | 1899           | 1904          | cis-acting regulatory element involved in the MeJA-responsiveness     |
| <i>CsDof50</i> | O2-site         | 427            | 436           | cis-acting regulatory element involved in zein metabolism regulation  |



| Name           | Cis-element | Start position | Stop position | Function                                                     |
|----------------|-------------|----------------|---------------|--------------------------------------------------------------|
| <i>CsDof50</i> | CAT-box     | 308            | 314           | cis-acting regulatory element related to meristem expression |
| <i>CsDof50</i> | CAAT-box    | 65             | 70            | common cis-acting element in promoter and enhancer regions   |
| <i>CsDof50</i> | CAAT-box    | 352            | 357           | common cis-acting element in promoter and enhancer regions   |
| <i>CsDof50</i> | CAAT-box    | 397            | 402           | common cis-acting element in promoter and enhancer regions   |
| <i>CsDof50</i> | CAAT-box    | 645            | 650           | common cis-acting element in promoter and enhancer regions   |
| <i>CsDof50</i> | CAAT-box    | 660            | 667           | common cis-acting element in promoter and enhancer regions   |
| <i>CsDof50</i> | CAAT-box    | 1075           | 1080          | common cis-acting element in promoter and enhancer regions   |
| <i>CsDof50</i> | CAAT-box    | 1197           | 1202          | common cis-acting element in promoter and enhancer regions   |
| <i>CsDof50</i> | CAAT-box    | 1399           | 1404          | common cis-acting element in promoter and enhancer regions   |
| <i>CsDof50</i> | CAAT-box    | 1444           | 1449          | common cis-acting element in promoter and enhancer regions   |
| <i>CsDof50</i> | CAAT-box    | 1465           | 1470          | common cis-acting element in promoter and enhancer regions   |
| <i>CsDof50</i> | CAAT-box    | 1624           | 1629          | common cis-acting element in promoter and enhancer regions   |
| <i>CsDof50</i> | CAAT-box    | 1950           | 1955          | common cis-acting element in promoter and enhancer regions   |
| <i>CsDof50</i> | TATA-box    | 212            | 216           | core promoter element around -30 of transcription start      |
| <i>CsDof50</i> | TATA-box    | 349            | 353           | core promoter element around -30 of transcription start      |
| <i>CsDof50</i> | TATA-box    | 375            | 379           | core promoter element around -30 of transcription start      |
| <i>CsDof50</i> | TATA-box    | 468            | 475           | core promoter element around -30 of transcription start      |
| <i>CsDof50</i> | TATA-box    | 471            | 477           | core promoter element around -30 of transcription start      |
| <i>CsDof50</i> | TATA-box    | 473            | 477           | core promoter element around -30 of transcription start      |
| <i>CsDof50</i> | TATA-box    | 686            | 693           | core promoter element around -30 of transcription start      |
| <i>CsDof50</i> | TATA-box    | 687            | 693           | core promoter element around -30 of transcription start      |
| <i>CsDof50</i> | TATA-box    | 688            | 693           | core promoter element around -30 of transcription start      |
| <i>CsDof50</i> | TATA-box    | 689            | 693           | core promoter element around -30 of transcription start      |
| <i>CsDof50</i> | TATA-box    | 836            | 842           | core promoter element around -30 of transcription start      |
| <i>CsDof50</i> | TATA-box    | 837            | 842           | core promoter element around -30 of transcription start      |
| <i>CsDof50</i> | TATA-box    | 838            | 842           | core promoter element around -30 of transcription start      |
| <i>CsDof50</i> | TATA-box    | 849            | 853           | core promoter element around -30 of transcription start      |
| <i>CsDof50</i> | TATA-box    | 892            | 898           | core promoter element around -30 of transcription start      |
| <i>CsDof50</i> | TATA-box    | 893            | 899           | core promoter element around -30 of transcription start      |
| <i>CsDof50</i> | TATA-box    | 894            | 898           | core promoter element around -30 of transcription start      |
| <i>CsDof50</i> | TATA-box    | 903            | 912           | core promoter element around -30 of transcription start      |
| <i>CsDof50</i> | TATA-box    | 909            | 913           | core promoter element around -30 of transcription start      |
| <i>CsDof50</i> | TATA-box    | 1330           | 1336          | core promoter element around -30 of transcription start      |
| <i>CsDof50</i> | TATA-box    | 1331           | 1335          | core promoter element around -30 of transcription start      |
| <i>CsDof50</i> | TATA-box    | 1338           | 1344          | core promoter element around -30 of transcription start      |
| <i>CsDof50</i> | TATA-box    | 1339           | 1343          | core promoter element around -30 of transcription start      |
| <i>CsDof50</i> | TATA-box    | 1348           | 1354          | core promoter element around -30 of transcription start      |
| <i>CsDof50</i> | TATA-box    | 1349           | 1355          | core promoter element around -30 of transcription start      |
| <i>CsDof50</i> | TATA-box    | 1350           | 1356          | core promoter element around -30 of transcription start      |
| <i>CsDof50</i> | TATA-box    | 1351           | 1357          | core promoter element around -30 of transcription start      |
| <i>CsDof50</i> | TATA-box    | 1352           | 1358          | core promoter element around -30 of transcription start      |
| <i>CsDof50</i> | TATA-box    | 1353           | 1359          | core promoter element around -30 of transcription start      |
| <i>CsDof50</i> | TATA-box    | 1354           | 1360          | core promoter element around -30 of transcription start      |
| <i>CsDof50</i> | TATA-box    | 1355           | 1361          | core promoter element around -30 of transcription start      |
| <i>CsDof50</i> | TATA-box    | 1356           | 1362          | core promoter element around -30 of transcription start      |
| <i>CsDof50</i> | TATA-box    | 1357           | 1361          | core promoter element around -30 of transcription start      |
| <i>CsDof50</i> | TATA-box    | 1510           | 1516          | core promoter element around -30 of transcription start      |
| <i>CsDof50</i> | TATA-box    | 1511           | 1517          | core promoter element around -30 of transcription start      |
| <i>CsDof50</i> | TATA-box    | 1512           | 1518          | core promoter element around -30 of transcription start      |
| <i>CsDof50</i> | TATA-box    | 1513           | 1517          | core promoter element around -30 of transcription start      |
| <i>CsDof50</i> | TATA-box    | 1547           | 1553          | core promoter element around -30 of transcription start      |

| Name           | Cis-element     | Start position | Stop position | Function                                                           |
|----------------|-----------------|----------------|---------------|--------------------------------------------------------------------|
| <i>CsDof50</i> | TATA-box        | 1549           | 1553          | core promoter element around -30 of transcription start            |
| <i>CsDof50</i> | TATA-box        | 1667           | 1671          | core promoter element around -30 of transcription start            |
| <i>CsDof50</i> | TATA-box        | 1736           | 1743          | core promoter element around -30 of transcription start            |
| <i>CsDof50</i> | TATA-box        | 1737           | 1743          | core promoter element around -30 of transcription start            |
| <i>CsDof50</i> | TATA-box        | 1738           | 1744          | core promoter element around -30 of transcription start            |
| <i>CsDof50</i> | TATA-box        | 1739           | 1743          | core promoter element around -30 of transcription start            |
| <i>CsDof50</i> | TATA-box        | 1762           | 1769          | core promoter element around -30 of transcription start            |
| <i>CsDof50</i> | TATA-box        | 1763           | 1769          | core promoter element around -30 of transcription start            |
| <i>CsDof50</i> | TATA-box        | 1764           | 1769          | core promoter element around -30 of transcription start            |
| <i>CsDof50</i> | TATA-box        | 1765           | 1769          | core promoter element around -30 of transcription start            |
| <i>CsDof50</i> | TATA-box        | 1808           | 1812          | core promoter element around -30 of transcription start            |
| <i>CsDof50</i> | TATA-box        | 1840           | 1844          | core promoter element around -30 of transcription start            |
| <i>CsDof50</i> | TATA-box        | 1849           | 1853          | core promoter element around -30 of transcription start            |
| <i>CsDof50</i> | TATA-box        | 1873           | 1879          | core promoter element around -30 of transcription start            |
| <i>CsDof50</i> | TATA-box        | 1874           | 1880          | core promoter element around -30 of transcription start            |
| <i>CsDof50</i> | TATA-box        | 1875           | 1881          | core promoter element around -30 of transcription start            |
| <i>CsDof50</i> | TATA-box        | 1876           | 1882          | core promoter element around -30 of transcription start            |
| <i>CsDof50</i> | TATA-box        | 1877           | 1883          | core promoter element around -30 of transcription start            |
| <i>CsDof50</i> | TATA-box        | 1878           | 1884          | core promoter element around -30 of transcription start            |
| <i>CsDof50</i> | TATA-box        | 1879           | 1885          | core promoter element around -30 of transcription start            |
| <i>CsDof50</i> | TATA-box        | 1880           | 1892          | core promoter element around -30 of transcription start            |
| <i>CsDof50</i> | TATA-box        | 1881           | 1887          | core promoter element around -30 of transcription start            |
| <i>CsDof50</i> | TATA-box        | 1882           | 1888          | core promoter element around -30 of transcription start            |
| <i>CsDof50</i> | TATA-box        | 1883           | 1889          | core promoter element around -30 of transcription start            |
| <i>CsDof50</i> | TATA-box        | 1884           | 1890          | core promoter element around -30 of transcription start            |
| <i>CsDof50</i> | TATA-box        | 1885           | 1891          | core promoter element around -30 of transcription start            |
| <i>CsDof50</i> | TATA-box        | 1886           | 1890          | core promoter element around -30 of transcription start            |
| <i>CsDof50</i> | TATA-box        | 1890           | 1897          | core promoter element around -30 of transcription start            |
| <i>CsDof50</i> | TATA-box        | 1891           | 1897          | core promoter element around -30 of transcription start            |
| <i>CsDof50</i> | TATA-box        | 1892           | 1899          | core promoter element around -30 of transcription start            |
| <i>CsDof50</i> | TATA-box        | 1893           | 1899          | core promoter element around -30 of transcription start            |
| <i>CsDof50</i> | TATA-box        | 1895           | 1899          | core promoter element around -30 of transcription start            |
| <i>CsDof50</i> | TATA-box        | 1912           | 1918          | core promoter element around -30 of transcription start            |
| <i>CsDof50</i> | TATA-box        | 1913           | 1919          | core promoter element around -30 of transcription start            |
| <i>CsDof50</i> | TATA-box        | 1914           | 1920          | core promoter element around -30 of transcription start            |
| <i>CsDof50</i> | TATA-box        | 1915           | 1919          | core promoter element around -30 of transcription start            |
| <i>CsDof51</i> | ABRE            | 522            | 527           | abscisic acid responsiveness                                       |
| <i>CsDof51</i> | TGA-element     | 1250           | 1256          | auxin-responsive element                                           |
| <i>CsDof51</i> | TC-rich repeats | 1341           | 1350          | cis-acting element involved in defense and stress responsiveness   |
| <i>CsDof51</i> | ACE             | 431            | 440           | cis-acting element involved in light responsiveness                |
| <i>CsDof51</i> | TCA-element     | 1912           | 1921          | cis-acting element involved in salicylic acid responsiveness       |
| <i>CsDof51</i> | G-box           | 521            | 527           | cis-acting regulatory element involved in light responsiveness     |
| <i>CsDof51</i> | RY-element      | 348            | 356           | cis-acting regulatory element involved in seed-specific regulation |
| <i>CsDof51</i> | CGTCA-motif     | 1370           | 1375          | cis-acting regulatory element involved in the MeJA-responsiveness  |
| <i>CsDof51</i> | TGACG-motif     | 1370           | 1375          | cis-acting regulatory element involved in the MeJA-responsiveness  |
| <i>CsDof51</i> | CAT-box         | 684            | 690           | cis-acting regulatory element related to meristem expression       |
| <i>CsDof51</i> | GCN4_motif      | 1221           | 1228          | cis-regulatory element involved in endosperm expression            |
| <i>CsDof51</i> | CAAT-box        | 76             | 81            | common cis-acting element in promoter and enhancer regions         |
| <i>CsDof51</i> | CAAT-box        | 406            | 411           | common cis-acting element in promoter and enhancer regions         |
| <i>CsDof51</i> | CAAT-box        | 409            | 414           | common cis-acting element in promoter and enhancer regions         |
| <i>CsDof51</i> | CAAT-box        | 451            | 456           | common cis-acting element in promoter and enhancer regions         |

| Name           | Cis-element | Start position | Stop position | Function                                                   |
|----------------|-------------|----------------|---------------|------------------------------------------------------------|
| <i>CsDof51</i> | CAAT-box    | 743            | 748           | common cis-acting element in promoter and enhancer regions |
| <i>CsDof51</i> | CAAT-box    | 769            | 774           | common cis-acting element in promoter and enhancer regions |
| <i>CsDof51</i> | CAAT-box    | 774            | 779           | common cis-acting element in promoter and enhancer regions |
| <i>CsDof51</i> | CAAT-box    | 866            | 871           | common cis-acting element in promoter and enhancer regions |
| <i>CsDof51</i> | CAAT-box    | 913            | 918           | common cis-acting element in promoter and enhancer regions |
| <i>CsDof51</i> | CAAT-box    | 916            | 921           | common cis-acting element in promoter and enhancer regions |
| <i>CsDof51</i> | CAAT-box    | 1044           | 1049          | common cis-acting element in promoter and enhancer regions |
| <i>CsDof51</i> | CAAT-box    | 1255           | 1260          | common cis-acting element in promoter and enhancer regions |
| <i>CsDof51</i> | CAAT-box    | 1282           | 1287          | common cis-acting element in promoter and enhancer regions |
| <i>CsDof51</i> | CAAT-box    | 1516           | 1521          | common cis-acting element in promoter and enhancer regions |
| <i>CsDof51</i> | CAAT-box    | 1619           | 1624          | common cis-acting element in promoter and enhancer regions |
| <i>CsDof51</i> | CAAT-box    | 1695           | 1700          | common cis-acting element in promoter and enhancer regions |
| <i>CsDof51</i> | CAAT-box    | 1761           | 1766          | common cis-acting element in promoter and enhancer regions |
| <i>CsDof51</i> | CAAT-box    | 1810           | 1815          | common cis-acting element in promoter and enhancer regions |
| <i>CsDof51</i> | CAAT-box    | 1873           | 1878          | common cis-acting element in promoter and enhancer regions |
| <i>CsDof51</i> | CAAT-box    | 1932           | 1937          | common cis-acting element in promoter and enhancer regions |
| <i>CsDof51</i> | TATA-box    | 7              | 11            | core promoter element around -30 of transcription start    |
| <i>CsDof51</i> | TATA-box    | 12             | 18            | core promoter element around -30 of transcription start    |
| <i>CsDof51</i> | TATA-box    | 13             | 18            | core promoter element around -30 of transcription start    |
| <i>CsDof51</i> | TATA-box    | 14             | 18            | core promoter element around -30 of transcription start    |
| <i>CsDof51</i> | TATA-box    | 33             | 38            | core promoter element around -30 of transcription start    |
| <i>CsDof51</i> | TATA-box    | 34             | 38            | core promoter element around -30 of transcription start    |
| <i>CsDof51</i> | TATA-box    | 39             | 47            | core promoter element around -30 of transcription start    |
| <i>CsDof51</i> | TATA-box    | 84             | 90            | core promoter element around -30 of transcription start    |
| <i>CsDof51</i> | TATA-box    | 85             | 92            | core promoter element around -30 of transcription start    |
| <i>CsDof51</i> | TATA-box    | 86             | 92            | core promoter element around -30 of transcription start    |
| <i>CsDof51</i> | TATA-box    | 87             | 93            | core promoter element around -30 of transcription start    |
| <i>CsDof51</i> | TATA-box    | 88             | 92            | core promoter element around -30 of transcription start    |
| <i>CsDof51</i> | TATA-box    | 187            | 194           | core promoter element around -30 of transcription start    |
| <i>CsDof51</i> | TATA-box    | 210            | 216           | core promoter element around -30 of transcription start    |
| <i>CsDof51</i> | TATA-box    | 212            | 216           | core promoter element around -30 of transcription start    |
| <i>CsDof51</i> | TATA-box    | 222            | 228           | core promoter element around -30 of transcription start    |
| <i>CsDof51</i> | TATA-box    | 223            | 227           | core promoter element around -30 of transcription start    |
| <i>CsDof51</i> | TATA-box    | 244            | 249           | core promoter element around -30 of transcription start    |
| <i>CsDof51</i> | TATA-box    | 245            | 249           | core promoter element around -30 of transcription start    |
| <i>CsDof51</i> | TATA-box    | 270            | 276           | core promoter element around -30 of transcription start    |
| <i>CsDof51</i> | TATA-box    | 271            | 275           | core promoter element around -30 of transcription start    |
| <i>CsDof51</i> | TATA-box    | 323            | 329           | core promoter element around -30 of transcription start    |
| <i>CsDof51</i> | TATA-box    | 324            | 330           | core promoter element around -30 of transcription start    |
| <i>CsDof51</i> | TATA-box    | 326            | 330           | core promoter element around -30 of transcription start    |
| <i>CsDof51</i> | TATA-box    | 399            | 405           | core promoter element around -30 of transcription start    |
| <i>CsDof51</i> | TATA-box    | 400            | 405           | core promoter element around -30 of transcription start    |
| <i>CsDof51</i> | TATA-box    | 401            | 405           | core promoter element around -30 of transcription start    |
| <i>CsDof51</i> | TATA-box    | 500            | 506           | core promoter element around -30 of transcription start    |
| <i>CsDof51</i> | TATA-box    | 501            | 507           | core promoter element around -30 of transcription start    |
| <i>CsDof51</i> | TATA-box    | 503            | 507           | core promoter element around -30 of transcription start    |
| <i>CsDof51</i> | TATA-box    | 564            | 570           | core promoter element around -30 of transcription start    |
| <i>CsDof51</i> | TATA-box    | 565            | 569           | core promoter element around -30 of transcription start    |
| <i>CsDof51</i> | TATA-box    | 668            | 674           | core promoter element around -30 of transcription start    |
| <i>CsDof51</i> | TATA-box    | 669            | 673           | core promoter element around -30 of transcription start    |
| <i>CsDof51</i> | TATA-box    | 797            | 803           | core promoter element around -30 of transcription start    |

| Name           | Cis-element     | Start position | Stop position | Function                                                            |
|----------------|-----------------|----------------|---------------|---------------------------------------------------------------------|
| <i>CsDof51</i> | TATA-box        | 798            | 804           | core promoter element around -30 of transcription start             |
| <i>CsDof51</i> | TATA-box        | 799            | 805           | core promoter element around -30 of transcription start             |
| <i>CsDof51</i> | TATA-box        | 800            | 806           | core promoter element around -30 of transcription start             |
| <i>CsDof51</i> | TATA-box        | 801            | 807           | core promoter element around -30 of transcription start             |
| <i>CsDof51</i> | TATA-box        | 802            | 808           | core promoter element around -30 of transcription start             |
| <i>CsDof51</i> | TATA-box        | 803            | 809           | core promoter element around -30 of transcription start             |
| <i>CsDof51</i> | TATA-box        | 804            | 810           | core promoter element around -30 of transcription start             |
| <i>CsDof51</i> | TATA-box        | 805            | 811           | core promoter element around -30 of transcription start             |
| <i>CsDof51</i> | TATA-box        | 807            | 811           | core promoter element around -30 of transcription start             |
| <i>CsDof51</i> | TATA-box        | 952            | 958           | core promoter element around -30 of transcription start             |
| <i>CsDof51</i> | TATA-box        | 953            | 957           | core promoter element around -30 of transcription start             |
| <i>CsDof51</i> | TATA-box        | 1003           | 1009          | core promoter element around -30 of transcription start             |
| <i>CsDof51</i> | TATA-box        | 1005           | 1009          | core promoter element around -30 of transcription start             |
| <i>CsDof51</i> | TATA-box        | 1301           | 1309          | core promoter element around -30 of transcription start             |
| <i>CsDof51</i> | TATA-box        | 1310           | 1314          | core promoter element around -30 of transcription start             |
| <i>CsDof51</i> | TATA-box        | 1433           | 1437          | core promoter element around -30 of transcription start             |
| <i>CsDof51</i> | TATA-box        | 1549           | 1553          | core promoter element around -30 of transcription start             |
| <i>CsDof51</i> | TATA-box        | 1622           | 1628          | core promoter element around -30 of transcription start             |
| <i>CsDof51</i> | TATA-box        | 1623           | 1628          | core promoter element around -30 of transcription start             |
| <i>CsDof51</i> | TATA-box        | 1624           | 1628          | core promoter element around -30 of transcription start             |
| <i>CsDof51</i> | TATA-box        | 1637           | 1643          | core promoter element around -30 of transcription start             |
| <i>CsDof51</i> | TATA-box        | 1638           | 1644          | core promoter element around -30 of transcription start             |
| <i>CsDof51</i> | TATA-box        | 1639           | 1645          | core promoter element around -30 of transcription start             |
| <i>CsDof51</i> | TATA-box        | 1640           | 1644          | core promoter element around -30 of transcription start             |
| <i>CsDof51</i> | TATA-box        | 1644           | 1650          | core promoter element around -30 of transcription start             |
| <i>CsDof51</i> | TATA-box        | 1645           | 1649          | core promoter element around -30 of transcription start             |
| <i>CsDof51</i> | TATA-box        | 1666           | 1671          | core promoter element around -30 of transcription start             |
| <i>CsDof51</i> | TATA-box        | 1667           | 1671          | core promoter element around -30 of transcription start             |
| <i>CsDof51</i> | TATA-box        | 1749           | 1754          | core promoter element around -30 of transcription start             |
| <i>CsDof51</i> | TATA-box        | 1750           | 1754          | core promoter element around -30 of transcription start             |
| <i>CsDof51</i> | TATA-box        | 1753           | 1759          | core promoter element around -30 of transcription start             |
| <i>CsDof51</i> | TATA-box        | 1754           | 1759          | core promoter element around -30 of transcription start             |
| <i>CsDof51</i> | TATA-box        | 1755           | 1759          | core promoter element around -30 of transcription start             |
| <i>CsDof51</i> | TATA-box        | 1898           | 1905          | core promoter element around -30 of transcription start             |
| <i>CsDof51</i> | GT1-motif       | 649            | 655           | light responsive element                                            |
| <i>CsDof51</i> | MBS             | 56             | 62            | MYB binding site involved in drought-inducibility                   |
| <i>CsDof51</i> | WUN-motif       | 780            | 789           | wound-responsive element                                            |
| <i>CsDof52</i> | ABRE            | 392            | 397           | abscisic acid responsiveness                                        |
| <i>CsDof52</i> | ABRE            | 586            | 591           | abscisic acid responsiveness                                        |
| <i>CsDof52</i> | ABRE            | 1411           | 1416          | abscisic acid responsiveness                                        |
| <i>CsDof52</i> | ABRE            | 1853           | 1863          | abscisic acid responsiveness                                        |
| <i>CsDof52</i> | ABRE            | 1855           | 1860          | abscisic acid responsiveness                                        |
| <i>CsDof52</i> | TC-rich repeats | 1557           | 1566          | cis-acting element involved in defense and stress responsiveness    |
| <i>CsDof52</i> | LTR             | 863            | 869           | cis-acting element involved in low-temperature responsiveness       |
| <i>CsDof52</i> | TCA-element     | 134            | 143           | cis-acting element involved in salicylic acid responsiveness        |
| <i>CsDof52</i> | ARE             | 283            | 289           | cis-acting regulatory element essential for the anaerobic induction |
| <i>CsDof52</i> | ARE             | 416            | 422           | cis-acting regulatory element essential for the anaerobic induction |
| <i>CsDof52</i> | ARE             | 630            | 636           | cis-acting regulatory element essential for the anaerobic induction |
| <i>CsDof52</i> | ARE             | 721            | 727           | cis-acting regulatory element essential for the anaerobic induction |
| <i>CsDof52</i> | ARE             | 852            | 858           | cis-acting regulatory element essential for the anaerobic induction |
| <i>CsDof52</i> | circadian       | 121            | 130           | cis-acting regulatory element involved in circadian control         |

| Name           | Cis-element | Start position | Stop position | Function                                                             |
|----------------|-------------|----------------|---------------|----------------------------------------------------------------------|
| <i>CsDof52</i> | G-box       | 391            | 397           | cis-acting regulatory element involved in light responsiveness       |
| <i>CsDof52</i> | G-box       | 1411           | 1417          | cis-acting regulatory element involved in light responsiveness       |
| <i>CsDof52</i> | G-Box       | 585            | 591           | cis-acting regulatory element involved in light responsiveness       |
| <i>CsDof52</i> | G-Box       | 1855           | 1861          | cis-acting regulatory element involved in light responsiveness       |
| <i>CsDof52</i> | RY-element  | 86             | 94            | cis-acting regulatory element involved in seed-specific regulation   |
| <i>CsDof52</i> | TGACG-motif | 1196           | 1201          | cis-acting regulatory element involved in the MeJA-responsiveness    |
| <i>CsDof52</i> | TGACG-motif | 1392           | 1397          | cis-acting regulatory element involved in the MeJA-responsiveness    |
| <i>CsDof52</i> | CGTCA-motif | 1196           | 1201          | cis-acting regulatory element involved in the MeJA-responsiveness    |
| <i>CsDof52</i> | CGTCA-motif | 1392           | 1397          | cis-acting regulatory element involved in the MeJA-responsiveness    |
| <i>CsDof52</i> | O2-site     | 397            | 406           | cis-acting regulatory element involved in zein metabolism regulation |
| <i>CsDof52</i> | CAT-box     | 1120           | 1126          | cis-acting regulatory element related to meristem expression         |
| <i>CsDof52</i> | CAT-box     | 1191           | 1197          | cis-acting regulatory element related to meristem expression         |
| <i>CsDof52</i> | CAAT-box    | 44             | 49            | common cis-acting element in promoter and enhancer regions           |
| <i>CsDof52</i> | CAAT-box    | 169            | 174           | common cis-acting element in promoter and enhancer regions           |
| <i>CsDof52</i> | CAAT-box    | 314            | 319           | common cis-acting element in promoter and enhancer regions           |
| <i>CsDof52</i> | CAAT-box    | 326            | 331           | common cis-acting element in promoter and enhancer regions           |
| <i>CsDof52</i> | CAAT-box    | 476            | 481           | common cis-acting element in promoter and enhancer regions           |
| <i>CsDof52</i> | CAAT-box    | 656            | 661           | common cis-acting element in promoter and enhancer regions           |
| <i>CsDof52</i> | CAAT-box    | 699            | 704           | common cis-acting element in promoter and enhancer regions           |
| <i>CsDof52</i> | CAAT-box    | 908            | 913           | common cis-acting element in promoter and enhancer regions           |
| <i>CsDof52</i> | CAAT-box    | 1165           | 1170          | common cis-acting element in promoter and enhancer regions           |
| <i>CsDof52</i> | CAAT-box    | 1178           | 1183          | common cis-acting element in promoter and enhancer regions           |
| <i>CsDof52</i> | CAAT-box    | 1275           | 1280          | common cis-acting element in promoter and enhancer regions           |
| <i>CsDof52</i> | CAAT-box    | 1330           | 1335          | common cis-acting element in promoter and enhancer regions           |
| <i>CsDof52</i> | CAAT-box    | 1378           | 1383          | common cis-acting element in promoter and enhancer regions           |
| <i>CsDof52</i> | CAAT-box    | 1649           | 1654          | common cis-acting element in promoter and enhancer regions           |
| <i>CsDof52</i> | TATA-box    | 291            | 297           | core promoter element around -30 of transcription start              |
| <i>CsDof52</i> | TATA-box    | 292            | 298           | core promoter element around -30 of transcription start              |
| <i>CsDof52</i> | TATA-box    | 294            | 298           | core promoter element around -30 of transcription start              |
| <i>CsDof52</i> | TATA-box    | 685            | 692           | core promoter element around -30 of transcription start              |
| <i>CsDof52</i> | TATA-box    | 686            | 692           | core promoter element around -30 of transcription start              |
| <i>CsDof52</i> | TATA-box    | 688            | 692           | core promoter element around -30 of transcription start              |
| <i>CsDof52</i> | TATA-box    | 880            | 888           | core promoter element around -30 of transcription start              |
| <i>CsDof52</i> | TATA-box    | 903            | 908           | core promoter element around -30 of transcription start              |
| <i>CsDof52</i> | TATA-box    | 904            | 908           | core promoter element around -30 of transcription start              |
| <i>CsDof52</i> | TATA-box    | 1173           | 1179          | core promoter element around -30 of transcription start              |
| <i>CsDof52</i> | TATA-box    | 1174           | 1179          | core promoter element around -30 of transcription start              |
| <i>CsDof52</i> | TATA-box    | 1175           | 1179          | core promoter element around -30 of transcription start              |
| <i>CsDof52</i> | TATA-box    | 1247           | 1251          | core promoter element around -30 of transcription start              |
| <i>CsDof52</i> | TATA-box    | 1295           | 1301          | core promoter element around -30 of transcription start              |
| <i>CsDof52</i> | TATA-box    | 1296           | 1302          | core promoter element around -30 of transcription start              |
| <i>CsDof52</i> | TATA-box    | 1297           | 1303          | core promoter element around -30 of transcription start              |
| <i>CsDof52</i> | TATA-box    | 1298           | 1302          | core promoter element around -30 of transcription start              |
| <i>CsDof52</i> | TATA-box    | 1319           | 1326          | core promoter element around -30 of transcription start              |
| <i>CsDof52</i> | TATA-box    | 1320           | 1326          | core promoter element around -30 of transcription start              |
| <i>CsDof52</i> | TATA-box    | 1321           | 1326          | core promoter element around -30 of transcription start              |
| <i>CsDof52</i> | TATA-box    | 1322           | 1326          | core promoter element around -30 of transcription start              |
| <i>CsDof52</i> | TATA-box    | 1337           | 1345          | core promoter element around -30 of transcription start              |
| <i>CsDof52</i> | TATA-box    | 1416           | 1422          | core promoter element around -30 of transcription start              |
| <i>CsDof52</i> | TATA-box    | 1417           | 1422          | core promoter element around -30 of transcription start              |
| <i>CsDof52</i> | TATA-box    | 1418           | 1422          | core promoter element around -30 of transcription start              |

| Name           | Cis-element     | Start position | Stop position | Function                                                            |
|----------------|-----------------|----------------|---------------|---------------------------------------------------------------------|
| <i>CsDof52</i> | TATA-box        | 1429           | 1433          | core promoter element around -30 of transcription start             |
| <i>CsDof52</i> | TATA-box        | 1545           | 1554          | core promoter element around -30 of transcription start             |
| <i>CsDof52</i> | TATA-box        | 1547           | 1551          | core promoter element around -30 of transcription start             |
| <i>CsDof52</i> | TATA-box        | 1620           | 1625          | core promoter element around -30 of transcription start             |
| <i>CsDof52</i> | TATA-box        | 1621           | 1625          | core promoter element around -30 of transcription start             |
| <i>CsDof52</i> | TATA-box        | 1683           | 1690          | core promoter element around -30 of transcription start             |
| <i>CsDof52</i> | TATA-box        | 1686           | 1692          | core promoter element around -30 of transcription start             |
| <i>CsDof52</i> | TATA-box        | 1688           | 1692          | core promoter element around -30 of transcription start             |
| <i>CsDof52</i> | TATA-box        | 1694           | 1700          | core promoter element around -30 of transcription start             |
| <i>CsDof52</i> | TATA-box        | 1695           | 1700          | core promoter element around -30 of transcription start             |
| <i>CsDof52</i> | TATA-box        | 1696           | 1700          | core promoter element around -30 of transcription start             |
| <i>CsDof52</i> | TATA-box        | 1715           | 1721          | core promoter element around -30 of transcription start             |
| <i>CsDof52</i> | TATA-box        | 1716           | 1723          | core promoter element around -30 of transcription start             |
| <i>CsDof52</i> | TATA-box        | 1717           | 1723          | core promoter element around -30 of transcription start             |
| <i>CsDof52</i> | TATA-box        | 1718           | 1724          | core promoter element around -30 of transcription start             |
| <i>CsDof52</i> | TATA-box        | 1719           | 1725          | core promoter element around -30 of transcription start             |
| <i>CsDof52</i> | TATA-box        | 1720           | 1726          | core promoter element around -30 of transcription start             |
| <i>CsDof52</i> | TATA-box        | 1721           | 1725          | core promoter element around -30 of transcription start             |
| <i>CsDof52</i> | TATA-box        | 1745           | 1749          | core promoter element around -30 of transcription start             |
| <i>CsDof52</i> | TATA-box        | 1903           | 1911          | core promoter element around -30 of transcription start             |
| <i>CsDof52</i> | TATA-box        | 1906           | 1913          | core promoter element around -30 of transcription start             |
| <i>CsDof52</i> | TATA-box        | 1907           | 1913          | core promoter element around -30 of transcription start             |
| <i>CsDof52</i> | TATA-box        | 1908           | 1914          | core promoter element around -30 of transcription start             |
| <i>CsDof52</i> | TATA-box        | 1909           | 1913          | core promoter element around -30 of transcription start             |
| <i>CsDof52</i> | TATA-box        | 1960           | 1965          | core promoter element around -30 of transcription start             |
| <i>CsDof52</i> | TATA-box        | 1961           | 1965          | core promoter element around -30 of transcription start             |
| <i>CsDof52</i> | GARE-motif      | 536            | 543           | gibberellin-responsive element                                      |
| <i>CsDof52</i> | GT1-motif       | 575            | 581           | light responsive element                                            |
| <i>CsDof52</i> | MBS             | 1056           | 1062          | MYB binding site involved in drought-inducibility                   |
| <i>CsDof52</i> | CCAAT-box       | 1132           | 1138          | MYBHv1 binding site                                                 |
| <i>CsDof53</i> | ABRE            | 1526           | 1532          | abscisic acid responsiveness                                        |
| <i>CsDof53</i> | ABRE            | 1527           | 1532          | abscisic acid responsiveness                                        |
| <i>CsDof53</i> | ABRE            | 1792           | 1797          | abscisic acid responsiveness                                        |
| <i>CsDof53</i> | TC-rich repeats | 404            | 413           | cis-acting element involved in defense and stress responsiveness    |
| <i>CsDof53</i> | TATC-box        | 821            | 828           | cis-acting element involved in gibberellin-responsiveness           |
| <i>CsDof53</i> | LTR             | 190            | 196           | cis-acting element involved in low-temperature responsiveness       |
| <i>CsDof53</i> | LTR             | 1825           | 1831          | cis-acting element involved in low-temperature responsiveness       |
| <i>CsDof53</i> | ARE             | 647            | 653           | cis-acting regulatory element essential for the anaerobic induction |
| <i>CsDof53</i> | ARE             | 1298           | 1304          | cis-acting regulatory element essential for the anaerobic induction |
| <i>CsDof53</i> | ARE             | 1557           | 1563          | cis-acting regulatory element essential for the anaerobic induction |
| <i>CsDof53</i> | ARE             | 1576           | 1582          | cis-acting regulatory element essential for the anaerobic induction |
| <i>CsDof53</i> | AuxRR-core      | 625            | 632           | cis-acting regulatory element involved in auxin responsiveness      |
| <i>CsDof53</i> | circadian       | 862            | 871           | cis-acting regulatory element involved in circadian control         |
| <i>CsDof53</i> | G-Box           | 1526           | 1532          | cis-acting regulatory element involved in light responsiveness      |
| <i>CsDof53</i> | G-Box           | 1792           | 1798          | cis-acting regulatory element involved in light responsiveness      |
| <i>CsDof53</i> | G-box           | 968            | 974           | cis-acting regulatory element involved in light responsiveness      |
| <i>CsDof53</i> | G-box           | 1525           | 1533          | cis-acting regulatory element involved in light responsiveness      |
| <i>CsDof53</i> | G-box           | 1526           | 1532          | cis-acting regulatory element involved in light responsiveness      |
| <i>CsDof53</i> | CGTCA-motif     | 533            | 538           | cis-acting regulatory element involved in the MeJA-responsiveness   |
| <i>CsDof53</i> | TGACG-motif     | 533            | 538           | cis-acting regulatory element involved in the MeJA-responsiveness   |
| <i>CsDof53</i> | CAAT-box        | 54             | 59            | common cis-acting element in promoter and enhancer regions          |

| Name           | Cis-element | Start position | Stop position | Function                                                   |
|----------------|-------------|----------------|---------------|------------------------------------------------------------|
| <i>CsDof53</i> | CAAT-box    | 217            | 222           | common cis-acting element in promoter and enhancer regions |
| <i>CsDof53</i> | CAAT-box    | 318            | 323           | common cis-acting element in promoter and enhancer regions |
| <i>CsDof53</i> | CAAT-box    | 367            | 377           | common cis-acting element in promoter and enhancer regions |
| <i>CsDof53</i> | CAAT-box    | 1038           | 1043          | common cis-acting element in promoter and enhancer regions |
| <i>CsDof53</i> | CAAT-box    | 1220           | 1225          | common cis-acting element in promoter and enhancer regions |
| <i>CsDof53</i> | CAAT-box    | 1281           | 1286          | common cis-acting element in promoter and enhancer regions |
| <i>CsDof53</i> | CAAT-box    | 1303           | 1308          | common cis-acting element in promoter and enhancer regions |
| <i>CsDof53</i> | CAAT-box    | 1327           | 1332          | common cis-acting element in promoter and enhancer regions |
| <i>CsDof53</i> | CAAT-box    | 1636           | 1641          | common cis-acting element in promoter and enhancer regions |
| <i>CsDof53</i> | CAAT-box    | 1642           | 1647          | common cis-acting element in promoter and enhancer regions |
| <i>CsDof53</i> | CAAT-box    | 1981           | 1986          | common cis-acting element in promoter and enhancer regions |
| <i>CsDof53</i> | TATA-box    | 346            | 351           | core promoter element around -30 of transcription start    |
| <i>CsDof53</i> | TATA-box    | 347            | 351           | core promoter element around -30 of transcription start    |
| <i>CsDof53</i> | TATA-box    | 722            | 726           | core promoter element around -30 of transcription start    |
| <i>CsDof53</i> | TATA-box    | 953            | 959           | core promoter element around -30 of transcription start    |
| <i>CsDof53</i> | TATA-box    | 954            | 960           | core promoter element around -30 of transcription start    |
| <i>CsDof53</i> | TATA-box    | 955            | 959           | core promoter element around -30 of transcription start    |
| <i>CsDof53</i> | TATA-box    | 1135           | 1142          | core promoter element around -30 of transcription start    |
| <i>CsDof53</i> | TATA-box    | 1136           | 1142          | core promoter element around -30 of transcription start    |
| <i>CsDof53</i> | TATA-box    | 1137           | 1142          | core promoter element around -30 of transcription start    |
| <i>CsDof53</i> | TATA-box    | 1138           | 1142          | core promoter element around -30 of transcription start    |
| <i>CsDof53</i> | TATA-box    | 1233           | 1240          | core promoter element around -30 of transcription start    |
| <i>CsDof53</i> | TATA-box    | 1234           | 1240          | core promoter element around -30 of transcription start    |
| <i>CsDof53</i> | TATA-box    | 1235           | 1240          | core promoter element around -30 of transcription start    |
| <i>CsDof53</i> | TATA-box    | 1236           | 1240          | core promoter element around -30 of transcription start    |
| <i>CsDof53</i> | TATA-box    | 1244           | 1253          | core promoter element around -30 of transcription start    |
| <i>CsDof53</i> | TATA-box    | 1245           | 1252          | core promoter element around -30 of transcription start    |
| <i>CsDof53</i> | TATA-box    | 1246           | 1252          | core promoter element around -30 of transcription start    |
| <i>CsDof53</i> | TATA-box    | 1247           | 1252          | core promoter element around -30 of transcription start    |
| <i>CsDof53</i> | TATA-box    | 1248           | 1252          | core promoter element around -30 of transcription start    |
| <i>CsDof53</i> | TATA-box    | 1257           | 1264          | core promoter element around -30 of transcription start    |
| <i>CsDof53</i> | TATA-box    | 1315           | 1322          | core promoter element around -30 of transcription start    |
| <i>CsDof53</i> | TATA-box    | 1348           | 1352          | core promoter element around -30 of transcription start    |
| <i>CsDof53</i> | TATA-box    | 1436           | 1440          | core promoter element around -30 of transcription start    |
| <i>CsDof53</i> | TATA-box    | 1439           | 1445          | core promoter element around -30 of transcription start    |
| <i>CsDof53</i> | TATA-box    | 1440           | 1445          | core promoter element around -30 of transcription start    |
| <i>CsDof53</i> | TATA-box    | 1441           | 1445          | core promoter element around -30 of transcription start    |
| <i>CsDof53</i> | TATA-box    | 1467           | 1473          | core promoter element around -30 of transcription start    |
| <i>CsDof53</i> | TATA-box    | 1468           | 1472          | core promoter element around -30 of transcription start    |
| <i>CsDof53</i> | TATA-box    | 1585           | 1590          | core promoter element around -30 of transcription start    |
| <i>CsDof53</i> | TATA-box    | 1586           | 1590          | core promoter element around -30 of transcription start    |
| <i>CsDof53</i> | TATA-box    | 1652           | 1656          | core promoter element around -30 of transcription start    |
| <i>CsDof53</i> | TATA-box    | 1778           | 1785          | core promoter element around -30 of transcription start    |
| <i>CsDof53</i> | TATA-box    | 1864           | 1870          | core promoter element around -30 of transcription start    |
| <i>CsDof53</i> | TATA-box    | 1865           | 1871          | core promoter element around -30 of transcription start    |
| <i>CsDof53</i> | TATA-box    | 1866           | 1870          | core promoter element around -30 of transcription start    |
| <i>CsDof53</i> | TATA-box    | 1938           | 1943          | core promoter element around -30 of transcription start    |
| <i>CsDof53</i> | TATA-box    | 1939           | 1943          | core promoter element around -30 of transcription start    |
| <i>CsDof53</i> | P-box       | 331            | 338           | gibberellin-responsive element                             |
| <i>CsDof54</i> | ABRE        | 1352           | 1357          | abscisic acid responsiveness                               |
| <i>CsDof54</i> | ABRE        | 1706           | 1712          | abscisic acid responsiveness                               |

| Name           | Cis-element | Start position | Stop position | Function                                                             |
|----------------|-------------|----------------|---------------|----------------------------------------------------------------------|
| <i>CsDof54</i> | ABRE        | 1707           | 1712          | abscisic acid responsiveness                                         |
| <i>CsDof54</i> | ABRE        | 1717           | 1722          | abscisic acid responsiveness                                         |
| <i>CsDof54</i> | LTR         | 1856           | 1862          | cis-acting element involved in low-temperature responsiveness        |
| <i>CsDof54</i> | ARE         | 650            | 656           | cis-acting regulatory element essential for the anaerobic induction  |
| <i>CsDof54</i> | ARE         | 711            | 717           | cis-acting regulatory element essential for the anaerobic induction  |
| <i>CsDof54</i> | ARE         | 1860           | 1866          | cis-acting regulatory element essential for the anaerobic induction  |
| <i>CsDof54</i> | G-box       | 65             | 71            | cis-acting regulatory element involved in light responsiveness       |
| <i>CsDof54</i> | G-box       | 289            | 295           | cis-acting regulatory element involved in light responsiveness       |
| <i>CsDof54</i> | G-box       | 1032           | 1038          | cis-acting regulatory element involved in light responsiveness       |
| <i>CsDof54</i> | G-box       | 1352           | 1358          | cis-acting regulatory element involved in light responsiveness       |
| <i>CsDof54</i> | G-box       | 1706           | 1712          | cis-acting regulatory element involved in light responsiveness       |
| <i>CsDof54</i> | G-box       | 1716           | 1722          | cis-acting regulatory element involved in light responsiveness       |
| <i>CsDof54</i> | G-Box       | 1706           | 1712          | cis-acting regulatory element involved in light responsiveness       |
| <i>CsDof54</i> | TGACG-motif | 1065           | 1070          | cis-acting regulatory element involved in the MeJA-responsiveness    |
| <i>CsDof54</i> | TGACG-motif | 1715           | 1720          | cis-acting regulatory element involved in the MeJA-responsiveness    |
| <i>CsDof54</i> | TGACG-motif | 1729           | 1734          | cis-acting regulatory element involved in the MeJA-responsiveness    |
| <i>CsDof54</i> | CGTCA-motif | 1065           | 1070          | cis-acting regulatory element involved in the MeJA-responsiveness    |
| <i>CsDof54</i> | CGTCA-motif | 1715           | 1720          | cis-acting regulatory element involved in the MeJA-responsiveness    |
| <i>CsDof54</i> | CGTCA-motif | 1729           | 1734          | cis-acting regulatory element involved in the MeJA-responsiveness    |
| <i>CsDof54</i> | O2-site     | 491            | 499           | cis-acting regulatory element involved in zein metabolism regulation |
| <i>CsDof54</i> | CAT-box     | 662            | 668           | cis-acting regulatory element related to meristem expression         |
| <i>CsDof54</i> | CAT-box     | 1331           | 1337          | cis-acting regulatory element related to meristem expression         |
| <i>CsDof54</i> | CAAT-box    | 136            | 141           | common cis-acting element in promoter and enhancer regions           |
| <i>CsDof54</i> | CAAT-box    | 143            | 148           | common cis-acting element in promoter and enhancer regions           |
| <i>CsDof54</i> | CAAT-box    | 223            | 228           | common cis-acting element in promoter and enhancer regions           |
| <i>CsDof54</i> | CAAT-box    | 495            | 500           | common cis-acting element in promoter and enhancer regions           |
| <i>CsDof54</i> | CAAT-box    | 637            | 642           | common cis-acting element in promoter and enhancer regions           |
| <i>CsDof54</i> | CAAT-box    | 709            | 714           | common cis-acting element in promoter and enhancer regions           |
| <i>CsDof54</i> | CAAT-box    | 724            | 729           | common cis-acting element in promoter and enhancer regions           |
| <i>CsDof54</i> | CAAT-box    | 749            | 754           | common cis-acting element in promoter and enhancer regions           |
| <i>CsDof54</i> | CAAT-box    | 824            | 829           | common cis-acting element in promoter and enhancer regions           |
| <i>CsDof54</i> | CAAT-box    | 916            | 921           | common cis-acting element in promoter and enhancer regions           |
| <i>CsDof54</i> | CAAT-box    | 923            | 928           | common cis-acting element in promoter and enhancer regions           |
| <i>CsDof54</i> | CAAT-box    | 1019           | 1024          | common cis-acting element in promoter and enhancer regions           |
| <i>CsDof54</i> | CAAT-box    | 1070           | 1075          | common cis-acting element in promoter and enhancer regions           |
| <i>CsDof54</i> | CAAT-box    | 1081           | 1086          | common cis-acting element in promoter and enhancer regions           |
| <i>CsDof54</i> | CAAT-box    | 1118           | 1123          | common cis-acting element in promoter and enhancer regions           |
| <i>CsDof54</i> | CAAT-box    | 1181           | 1186          | common cis-acting element in promoter and enhancer regions           |
| <i>CsDof54</i> | CAAT-box    | 1226           | 1231          | common cis-acting element in promoter and enhancer regions           |
| <i>CsDof54</i> | CAAT-box    | 1255           | 1260          | common cis-acting element in promoter and enhancer regions           |
| <i>CsDof54</i> | CAAT-box    | 1327           | 1332          | common cis-acting element in promoter and enhancer regions           |
| <i>CsDof54</i> | CAAT-box    | 1424           | 1429          | common cis-acting element in promoter and enhancer regions           |
| <i>CsDof54</i> | CAAT-box    | 1829           | 1834          | common cis-acting element in promoter and enhancer regions           |
| <i>CsDof54</i> | CAAT-box    | 1911           | 1916          | common cis-acting element in promoter and enhancer regions           |
| <i>CsDof54</i> | TATA-box    | 87             | 93            | core promoter element around -30 of transcription start              |
| <i>CsDof54</i> | TATA-box    | 88             | 92            | core promoter element around -30 of transcription start              |
| <i>CsDof54</i> | TATA-box    | 129            | 135           | core promoter element around -30 of transcription start              |
| <i>CsDof54</i> | TATA-box    | 130            | 137           | core promoter element around -30 of transcription start              |
| <i>CsDof54</i> | TATA-box    | 131            | 137           | core promoter element around -30 of transcription start              |
| <i>CsDof54</i> | TATA-box    | 132            | 138           | core promoter element around -30 of transcription start              |
| <i>CsDof54</i> | TATA-box    | 133            | 137           | core promoter element around -30 of transcription start              |





| Name           | Cis-element     | Start position | Stop position | Function                                                             |
|----------------|-----------------|----------------|---------------|----------------------------------------------------------------------|
| <i>CsDof54</i> | TATA-box        | 1382           | 1388          | core promoter element around -30 of transcription start              |
| <i>CsDof54</i> | TATA-box        | 1384           | 1388          | core promoter element around -30 of transcription start              |
| <i>CsDof54</i> | TATA-box        | 1389           | 1395          | core promoter element around -30 of transcription start              |
| <i>CsDof54</i> | TATA-box        | 1390           | 1395          | core promoter element around -30 of transcription start              |
| <i>CsDof54</i> | TATA-box        | 1391           | 1403          | core promoter element around -30 of transcription start              |
| <i>CsDof54</i> | TATA-box        | 1419           | 1425          | core promoter element around -30 of transcription start              |
| <i>CsDof54</i> | TATA-box        | 1420           | 1424          | core promoter element around -30 of transcription start              |
| <i>CsDof54</i> | TATA-box        | 1484           | 1491          | core promoter element around -30 of transcription start              |
| <i>CsDof54</i> | TATA-box        | 1532           | 1539          | core promoter element around -30 of transcription start              |
| <i>CsDof54</i> | TATA-box        | 1681           | 1685          | core promoter element around -30 of transcription start              |
| <i>CsDof54</i> | GC-motif        | 5              | 11            | enhancer-like element involved in anoxic specific inducibility       |
| <i>CsDof54</i> | P-box           | 1737           | 1744          | gibberellin-responsive element                                       |
| <i>CsDof54</i> | MBS             | 963            | 969           | MYB binding site involved in drought-inducibility                    |
| <i>CsDof54</i> | MRE             | 1158           | 1165          | MYB binding site involved in light responsiveness                    |
| <i>CsDof55</i> | ABRE            | 3              | 10            | abscisic acid responsiveness                                         |
| <i>CsDof55</i> | AT-rich element | 1933           | 1943          | binding site of AT-rich DNA binding protein (ATBP-1)                 |
| <i>CsDof55</i> | A-box           | 202            | 208           | cis-acting regulatory element                                        |
| <i>CsDof55</i> | ARE             | 730            | 736           | cis-acting regulatory element essential for the anaerobic induction  |
| <i>CsDof55</i> | RY-element      | 368            | 376           | cis-acting regulatory element involved in seed-specific regulation   |
| <i>CsDof55</i> | TGACG-motif     | 1647           | 1652          | cis-acting regulatory element involved in the MeJA-responsiveness    |
| <i>CsDof55</i> | TGACG-motif     | 1898           | 1903          | cis-acting regulatory element involved in the MeJA-responsiveness    |
| <i>CsDof55</i> | CGTCA-motif     | 1647           | 1652          | cis-acting regulatory element involved in the MeJA-responsiveness    |
| <i>CsDof55</i> | CGTCA-motif     | 1898           | 1903          | cis-acting regulatory element involved in the MeJA-responsiveness    |
| <i>CsDof55</i> | O2-site         | 412            | 421           | cis-acting regulatory element involved in zein metabolism regulation |
| <i>CsDof55</i> | CAT-box         | 304            | 310           | cis-acting regulatory element related to meristem expression         |
| <i>CsDof55</i> | CAAT-box        | 61             | 66            | common cis-acting element in promoter and enhancer regions           |
| <i>CsDof55</i> | CAAT-box        | 382            | 387           | common cis-acting element in promoter and enhancer regions           |
| <i>CsDof55</i> | CAAT-box        | 629            | 634           | common cis-acting element in promoter and enhancer regions           |
| <i>CsDof55</i> | CAAT-box        | 644            | 651           | common cis-acting element in promoter and enhancer regions           |
| <i>CsDof55</i> | CAAT-box        | 801            | 806           | common cis-acting element in promoter and enhancer regions           |
| <i>CsDof55</i> | CAAT-box        | 1063           | 1068          | common cis-acting element in promoter and enhancer regions           |
| <i>CsDof55</i> | CAAT-box        | 1185           | 1190          | common cis-acting element in promoter and enhancer regions           |
| <i>CsDof55</i> | CAAT-box        | 1393           | 1398          | common cis-acting element in promoter and enhancer regions           |
| <i>CsDof55</i> | CAAT-box        | 1438           | 1443          | common cis-acting element in promoter and enhancer regions           |
| <i>CsDof55</i> | CAAT-box        | 1630           | 1635          | common cis-acting element in promoter and enhancer regions           |
| <i>CsDof55</i> | CAAT-box        | 1761           | 1766          | common cis-acting element in promoter and enhancer regions           |
| <i>CsDof55</i> | CAAT-box        | 1764           | 1769          | common cis-acting element in promoter and enhancer regions           |
| <i>CsDof55</i> | CAAT-box        | 1949           | 1954          | common cis-acting element in promoter and enhancer regions           |
| <i>CsDof55</i> | TATA-box        | 208            | 212           | core promoter element around -30 of transcription start              |
| <i>CsDof55</i> | TATA-box        | 355            | 359           | core promoter element around -30 of transcription start              |
| <i>CsDof55</i> | TATA-box        | 452            | 459           | core promoter element around -30 of transcription start              |
| <i>CsDof55</i> | TATA-box        | 453            | 459           | core promoter element around -30 of transcription start              |
| <i>CsDof55</i> | TATA-box        | 454            | 461           | core promoter element around -30 of transcription start              |
| <i>CsDof55</i> | TATA-box        | 455            | 461           | core promoter element around -30 of transcription start              |
| <i>CsDof55</i> | TATA-box        | 456            | 462           | core promoter element around -30 of transcription start              |
| <i>CsDof55</i> | TATA-box        | 457            | 463           | core promoter element around -30 of transcription start              |
| <i>CsDof55</i> | TATA-box        | 459            | 463           | core promoter element around -30 of transcription start              |
| <i>CsDof55</i> | TATA-box        | 670            | 677           | core promoter element around -30 of transcription start              |
| <i>CsDof55</i> | TATA-box        | 671            | 677           | core promoter element around -30 of transcription start              |
| <i>CsDof55</i> | TATA-box        | 672            | 677           | core promoter element around -30 of transcription start              |
| <i>CsDof55</i> | TATA-box        | 673            | 677           | core promoter element around -30 of transcription start              |



| Name           | Cis-element     | Start position | Stop position | Function                                                          |
|----------------|-----------------|----------------|---------------|-------------------------------------------------------------------|
| <i>CsDof55</i> | TATA-box        | 1914           | 1920          | core promoter element around -30 of transcription start           |
| <i>CsDof55</i> | TATA-box        | 1916           | 1920          | core promoter element around -30 of transcription start           |
| <i>CsDof55</i> | P-box           | 266            | 273           | gibberellin-responsive element                                    |
| <i>CsDof55</i> | GT1-motif       | 1563           | 1570          | light responsive element                                          |
| <i>CsDof55</i> | GT1-motif       | 1564           | 1570          | light responsive element                                          |
| <i>CsDof56</i> | ABRE            | 547            | 552           | abscisic acid responsiveness                                      |
| <i>CsDof56</i> | TGA-element     | 1261           | 1267          | auxin-responsive element                                          |
| <i>CsDof56</i> | TC-rich repeats | 1351           | 1360          | cis-acting element involved in defense and stress responsiveness  |
| <i>CsDof56</i> | ACE             | 461            | 470           | cis-acting element involved in light responsiveness               |
| <i>CsDof56</i> | LTR             | 1              | 7             | cis-acting element involved in low-temperature responsiveness     |
| <i>CsDof56</i> | TCA-element     | 1911           | 1920          | cis-acting element involved in salicylic acid responsiveness      |
| <i>CsDof56</i> | G-box           | 546            | 552           | cis-acting regulatory element involved in light responsiveness    |
| <i>CsDof56</i> | TGACG-motif     | 1380           | 1385          | cis-acting regulatory element involved in the MeJA-responsiveness |
| <i>CsDof56</i> | CGTCA-motif     | 1380           | 1385          | cis-acting regulatory element involved in the MeJA-responsiveness |
| <i>CsDof56</i> | CAT-box         | 702            | 708           | cis-acting regulatory element related to meristem expression      |
| <i>CsDof56</i> | GCN4_motif      | 1232           | 1239          | cis-regulatory element involved in endosperm expression           |
| <i>CsDof56</i> | CAAT-box        | 125            | 130           | common cis-acting element in promoter and enhancer regions        |
| <i>CsDof56</i> | CAAT-box        | 230            | 235           | common cis-acting element in promoter and enhancer regions        |
| <i>CsDof56</i> | CAAT-box        | 260            | 265           | common cis-acting element in promoter and enhancer regions        |
| <i>CsDof56</i> | CAAT-box        | 439            | 444           | common cis-acting element in promoter and enhancer regions        |
| <i>CsDof56</i> | CAAT-box        | 481            | 486           | common cis-acting element in promoter and enhancer regions        |
| <i>CsDof56</i> | CAAT-box        | 761            | 766           | common cis-acting element in promoter and enhancer regions        |
| <i>CsDof56</i> | CAAT-box        | 787            | 792           | common cis-acting element in promoter and enhancer regions        |
| <i>CsDof56</i> | CAAT-box        | 792            | 797           | common cis-acting element in promoter and enhancer regions        |
| <i>CsDof56</i> | CAAT-box        | 880            | 885           | common cis-acting element in promoter and enhancer regions        |
| <i>CsDof56</i> | CAAT-box        | 927            | 932           | common cis-acting element in promoter and enhancer regions        |
| <i>CsDof56</i> | CAAT-box        | 930            | 935           | common cis-acting element in promoter and enhancer regions        |
| <i>CsDof56</i> | CAAT-box        | 1082           | 1087          | common cis-acting element in promoter and enhancer regions        |
| <i>CsDof56</i> | CAAT-box        | 1293           | 1298          | common cis-acting element in promoter and enhancer regions        |
| <i>CsDof56</i> | CAAT-box        | 1520           | 1525          | common cis-acting element in promoter and enhancer regions        |
| <i>CsDof56</i> | CAAT-box        | 1623           | 1628          | common cis-acting element in promoter and enhancer regions        |
| <i>CsDof56</i> | CAAT-box        | 1699           | 1704          | common cis-acting element in promoter and enhancer regions        |
| <i>CsDof56</i> | CAAT-box        | 1765           | 1770          | common cis-acting element in promoter and enhancer regions        |
| <i>CsDof56</i> | CAAT-box        | 1810           | 1815          | common cis-acting element in promoter and enhancer regions        |
| <i>CsDof56</i> | CAAT-box        | 1872           | 1877          | common cis-acting element in promoter and enhancer regions        |
| <i>CsDof56</i> | CAAT-box        | 1932           | 1937          | common cis-acting element in promoter and enhancer regions        |
| <i>CsDof56</i> | TATA-box        | 29             | 35            | core promoter element around -30 of transcription start           |
| <i>CsDof56</i> | TATA-box        | 30             | 34            | core promoter element around -30 of transcription start           |
| <i>CsDof56</i> | TATA-box        | 72             | 78            | core promoter element around -30 of transcription start           |
| <i>CsDof56</i> | TATA-box        | 74             | 78            | core promoter element around -30 of transcription start           |
| <i>CsDof56</i> | TATA-box        | 138            | 146           | core promoter element around -30 of transcription start           |
| <i>CsDof56</i> | TATA-box        | 190            | 196           | core promoter element around -30 of transcription start           |
| <i>CsDof56</i> | TATA-box        | 191            | 197           | core promoter element around -30 of transcription start           |
| <i>CsDof56</i> | TATA-box        | 193            | 197           | core promoter element around -30 of transcription start           |
| <i>CsDof56</i> | TATA-box        | 358            | 362           | core promoter element around -30 of transcription start           |
| <i>CsDof56</i> | TATA-box        | 376            | 382           | core promoter element around -30 of transcription start           |
| <i>CsDof56</i> | TATA-box        | 377            | 381           | core promoter element around -30 of transcription start           |
| <i>CsDof56</i> | TATA-box        | 393            | 401           | core promoter element around -30 of transcription start           |
| <i>CsDof56</i> | TATA-box        | 429            | 435           | core promoter element around -30 of transcription start           |
| <i>CsDof56</i> | TATA-box        | 430            | 435           | core promoter element around -30 of transcription start           |
| <i>CsDof56</i> | TATA-box        | 431            | 435           | core promoter element around -30 of transcription start           |



| Name           | Cis-element | Start position | Stop position | Function                                                             |
|----------------|-------------|----------------|---------------|----------------------------------------------------------------------|
| <i>CsDof56</i> | TATA-box    | 1643           | 1649          | core promoter element around -30 of transcription start              |
| <i>CsDof56</i> | TATA-box    | 1644           | 1648          | core promoter element around -30 of transcription start              |
| <i>CsDof56</i> | TATA-box    | 1648           | 1654          | core promoter element around -30 of transcription start              |
| <i>CsDof56</i> | TATA-box    | 1649           | 1653          | core promoter element around -30 of transcription start              |
| <i>CsDof56</i> | TATA-box    | 1670           | 1675          | core promoter element around -30 of transcription start              |
| <i>CsDof56</i> | TATA-box    | 1671           | 1675          | core promoter element around -30 of transcription start              |
| <i>CsDof56</i> | TATA-box    | 1753           | 1758          | core promoter element around -30 of transcription start              |
| <i>CsDof56</i> | TATA-box    | 1754           | 1758          | core promoter element around -30 of transcription start              |
| <i>CsDof56</i> | TATA-box    | 1897           | 1904          | core promoter element around -30 of transcription start              |
| <i>CsDof56</i> | GARE-motif  | 67             | 74            | gibberellin-responsive element                                       |
| <i>CsDof56</i> | GT1-motif   | 133            | 139           | light responsive element                                             |
| <i>CsDof56</i> | GT1-motif   | 149            | 155           | light responsive element                                             |
| <i>CsDof56</i> | GT1-motif   | 665            | 671           | light responsive element                                             |
| <i>CsDof56</i> | WUN-motif   | 10             | 19            | wound-responsive element                                             |
| <i>CsDof56</i> | WUN-motif   | 798            | 807           | wound-responsive element                                             |
| <i>CsDof57</i> | ABRE        | 402            | 407           | abscisic acid responsiveness                                         |
| <i>CsDof57</i> | ABRE        | 593            | 598           | abscisic acid responsiveness                                         |
| <i>CsDof57</i> | ABRE        | 1595           | 1604          | abscisic acid responsiveness                                         |
| <i>CsDof57</i> | ABRE        | 1853           | 1863          | abscisic acid responsiveness                                         |
| <i>CsDof57</i> | ABRE        | 1855           | 1860          | abscisic acid responsiveness                                         |
| <i>CsDof57</i> | ARE         | 426            | 432           | cis-acting regulatory element essential for the anaerobic induction  |
| <i>CsDof57</i> | ARE         | 629            | 635           | cis-acting regulatory element essential for the anaerobic induction  |
| <i>CsDof57</i> | ARE         | 721            | 727           | cis-acting regulatory element essential for the anaerobic induction  |
| <i>CsDof57</i> | ARE         | 852            | 858           | cis-acting regulatory element essential for the anaerobic induction  |
| <i>CsDof57</i> | G-Box       | 592            | 598           | cis-acting regulatory element involved in light responsiveness       |
| <i>CsDof57</i> | G-Box       | 1855           | 1861          | cis-acting regulatory element involved in light responsiveness       |
| <i>CsDof57</i> | G-box       | 401            | 407           | cis-acting regulatory element involved in light responsiveness       |
| <i>CsDof57</i> | O2-site     | 407            | 416           | cis-acting regulatory element involved in zein metabolism regulation |
| <i>CsDof57</i> | CAT-box     | 1136           | 1142          | cis-acting regulatory element related to meristem expression         |
| <i>CsDof57</i> | CAT-box     | 1207           | 1213          | cis-acting regulatory element related to meristem expression         |
| <i>CsDof57</i> | CAAT-box    | 483            | 488           | common cis-acting element in promoter and enhancer regions           |
| <i>CsDof57</i> | CAAT-box    | 655            | 660           | common cis-acting element in promoter and enhancer regions           |
| <i>CsDof57</i> | CAAT-box    | 665            | 670           | common cis-acting element in promoter and enhancer regions           |
| <i>CsDof57</i> | CAAT-box    | 699            | 704           | common cis-acting element in promoter and enhancer regions           |
| <i>CsDof57</i> | CAAT-box    | 910            | 915           | common cis-acting element in promoter and enhancer regions           |
| <i>CsDof57</i> | CAAT-box    | 1194           | 1199          | common cis-acting element in promoter and enhancer regions           |
| <i>CsDof57</i> | CAAT-box    | 1291           | 1296          | common cis-acting element in promoter and enhancer regions           |
| <i>CsDof57</i> | CAAT-box    | 1346           | 1351          | common cis-acting element in promoter and enhancer regions           |
| <i>CsDof57</i> | CAAT-box    | 1650           | 1655          | common cis-acting element in promoter and enhancer regions           |
| <i>CsDof57</i> | TATA-box    | 684            | 693           | core promoter element around -30 of transcription start              |
| <i>CsDof57</i> | TATA-box    | 685            | 692           | core promoter element around -30 of transcription start              |
| <i>CsDof57</i> | TATA-box    | 686            | 692           | core promoter element around -30 of transcription start              |
| <i>CsDof57</i> | TATA-box    | 687            | 692           | core promoter element around -30 of transcription start              |
| <i>CsDof57</i> | TATA-box    | 688            | 692           | core promoter element around -30 of transcription start              |
| <i>CsDof57</i> | TATA-box    | 882            | 890           | core promoter element around -30 of transcription start              |
| <i>CsDof57</i> | TATA-box    | 905            | 910           | core promoter element around -30 of transcription start              |
| <i>CsDof57</i> | TATA-box    | 906            | 910           | core promoter element around -30 of transcription start              |
| <i>CsDof57</i> | TATA-box    | 997            | 1001          | core promoter element around -30 of transcription start              |
| <i>CsDof57</i> | TATA-box    | 1015           | 1019          | core promoter element around -30 of transcription start              |
| <i>CsDof57</i> | TATA-box    | 1263           | 1267          | core promoter element around -30 of transcription start              |
| <i>CsDof57</i> | TATA-box    | 1311           | 1317          | core promoter element around -30 of transcription start              |

| Name           | Cis-element | Start position | Stop position | Function                                                            |
|----------------|-------------|----------------|---------------|---------------------------------------------------------------------|
| <i>CsDof57</i> | TATA-box    | 1312           | 1318          | core promoter element around -30 of transcription start             |
| <i>CsDof57</i> | TATA-box    | 1313           | 1319          | core promoter element around -30 of transcription start             |
| <i>CsDof57</i> | TATA-box    | 1314           | 1318          | core promoter element around -30 of transcription start             |
| <i>CsDof57</i> | TATA-box    | 1335           | 1342          | core promoter element around -30 of transcription start             |
| <i>CsDof57</i> | TATA-box    | 1336           | 1342          | core promoter element around -30 of transcription start             |
| <i>CsDof57</i> | TATA-box    | 1337           | 1342          | core promoter element around -30 of transcription start             |
| <i>CsDof57</i> | TATA-box    | 1338           | 1342          | core promoter element around -30 of transcription start             |
| <i>CsDof57</i> | TATA-box    | 1353           | 1361          | core promoter element around -30 of transcription start             |
| <i>CsDof57</i> | TATA-box    | 1432           | 1438          | core promoter element around -30 of transcription start             |
| <i>CsDof57</i> | TATA-box    | 1433           | 1438          | core promoter element around -30 of transcription start             |
| <i>CsDof57</i> | TATA-box    | 1434           | 1438          | core promoter element around -30 of transcription start             |
| <i>CsDof57</i> | TATA-box    | 1563           | 1567          | core promoter element around -30 of transcription start             |
| <i>CsDof57</i> | TATA-box    | 1621           | 1626          | core promoter element around -30 of transcription start             |
| <i>CsDof57</i> | TATA-box    | 1622           | 1626          | core promoter element around -30 of transcription start             |
| <i>CsDof57</i> | TATA-box    | 1684           | 1691          | core promoter element around -30 of transcription start             |
| <i>CsDof57</i> | TATA-box    | 1687           | 1693          | core promoter element around -30 of transcription start             |
| <i>CsDof57</i> | TATA-box    | 1689           | 1693          | core promoter element around -30 of transcription start             |
| <i>CsDof57</i> | TATA-box    | 1695           | 1701          | core promoter element around -30 of transcription start             |
| <i>CsDof57</i> | TATA-box    | 1696           | 1701          | core promoter element around -30 of transcription start             |
| <i>CsDof57</i> | TATA-box    | 1697           | 1701          | core promoter element around -30 of transcription start             |
| <i>CsDof57</i> | TATA-box    | 1716           | 1722          | core promoter element around -30 of transcription start             |
| <i>CsDof57</i> | TATA-box    | 1717           | 1722          | core promoter element around -30 of transcription start             |
| <i>CsDof57</i> | TATA-box    | 1718           | 1722          | core promoter element around -30 of transcription start             |
| <i>CsDof57</i> | TATA-box    | 1746           | 1750          | core promoter element around -30 of transcription start             |
| <i>CsDof57</i> | TATA-box    | 1903           | 1911          | core promoter element around -30 of transcription start             |
| <i>CsDof57</i> | TATA-box    | 1906           | 1913          | core promoter element around -30 of transcription start             |
| <i>CsDof57</i> | TATA-box    | 1907           | 1913          | core promoter element around -30 of transcription start             |
| <i>CsDof57</i> | TATA-box    | 1908           | 1914          | core promoter element around -30 of transcription start             |
| <i>CsDof57</i> | TATA-box    | 1909           | 1913          | core promoter element around -30 of transcription start             |
| <i>CsDof57</i> | TATA-box    | 1960           | 1965          | core promoter element around -30 of transcription start             |
| <i>CsDof57</i> | TATA-box    | 1961           | 1965          | core promoter element around -30 of transcription start             |
| <i>CsDof57</i> | GARE-motif  | 543            | 550           | gibberellin-responsive element                                      |
| <i>CsDof57</i> | GT1-motif   | 582            | 588           | light responsive element                                            |
| <i>CsDof57</i> | GT1-motif   | 1062           | 1068          | light responsive element                                            |
| <i>CsDof57</i> | MBS         | 1072           | 1078          | MYB binding site involved in drought-inducibility                   |
| <i>CsDof57</i> | CCAAT-box   | 1148           | 1154          | MYBHv1 binding site                                                 |
| <i>CsDof58</i> | ABRE        | 562            | 567           | abscisic acid responsiveness                                        |
| <i>CsDof58</i> | ABRE        | 627            | 632           | abscisic acid responsiveness                                        |
| <i>CsDof58</i> | ABRE        | 1853           | 1863          | abscisic acid responsiveness                                        |
| <i>CsDof58</i> | ABRE        | 1855           | 1860          | abscisic acid responsiveness                                        |
| <i>CsDof58</i> | ARE         | 271            | 277           | cis-acting regulatory element essential for the anaerobic induction |
| <i>CsDof58</i> | ARE         | 448            | 454           | cis-acting regulatory element essential for the anaerobic induction |
| <i>CsDof58</i> | ARE         | 638            | 644           | cis-acting regulatory element essential for the anaerobic induction |
| <i>CsDof58</i> | ARE         | 729            | 735           | cis-acting regulatory element essential for the anaerobic induction |
| <i>CsDof58</i> | ARE         | 860            | 866           | cis-acting regulatory element essential for the anaerobic induction |
| <i>CsDof58</i> | G-Box       | 561            | 567           | cis-acting regulatory element involved in light responsiveness      |
| <i>CsDof58</i> | G-Box       | 627            | 633           | cis-acting regulatory element involved in light responsiveness      |
| <i>CsDof58</i> | G-Box       | 1855           | 1861          | cis-acting regulatory element involved in light responsiveness      |
| <i>CsDof58</i> | TGACG-motif | 807            | 812           | cis-acting regulatory element involved in the MeJA-responsiveness   |
| <i>CsDof58</i> | TGACG-motif | 1398           | 1403          | cis-acting regulatory element involved in the MeJA-responsiveness   |
| <i>CsDof58</i> | CGTCA-motif | 807            | 812           | cis-acting regulatory element involved in the MeJA-responsiveness   |

| Name           | Cis-element | Start position | Stop position | Function                                                          |
|----------------|-------------|----------------|---------------|-------------------------------------------------------------------|
| <i>CsDof58</i> | CGTCA-motif | 1398           | 1403          | cis-acting regulatory element involved in the MeJA-responsiveness |
| <i>CsDof58</i> | CAT-box     | 1136           | 1142          | cis-acting regulatory element related to meristem expression      |
| <i>CsDof58</i> | CAAT-box    | 288            | 293           | common cis-acting element in promoter and enhancer regions        |
| <i>CsDof58</i> | CAAT-box    | 376            | 381           | common cis-acting element in promoter and enhancer regions        |
| <i>CsDof58</i> | CAAT-box    | 664            | 669           | common cis-acting element in promoter and enhancer regions        |
| <i>CsDof58</i> | CAAT-box    | 674            | 679           | common cis-acting element in promoter and enhancer regions        |
| <i>CsDof58</i> | CAAT-box    | 708            | 713           | common cis-acting element in promoter and enhancer regions        |
| <i>CsDof58</i> | CAAT-box    | 916            | 921           | common cis-acting element in promoter and enhancer regions        |
| <i>CsDof58</i> | CAAT-box    | 1194           | 1199          | common cis-acting element in promoter and enhancer regions        |
| <i>CsDof58</i> | CAAT-box    | 1297           | 1302          | common cis-acting element in promoter and enhancer regions        |
| <i>CsDof58</i> | CAAT-box    | 1352           | 1357          | common cis-acting element in promoter and enhancer regions        |
| <i>CsDof58</i> | CAAT-box    | 1458           | 1463          | common cis-acting element in promoter and enhancer regions        |
| <i>CsDof58</i> | CAAT-box    | 1649           | 1654          | common cis-acting element in promoter and enhancer regions        |
| <i>CsDof58</i> | TATA-box    | 156            | 162           | core promoter element around -30 of transcription start           |
| <i>CsDof58</i> | TATA-box    | 157            | 162           | core promoter element around -30 of transcription start           |
| <i>CsDof58</i> | TATA-box    | 158            | 162           | core promoter element around -30 of transcription start           |
| <i>CsDof58</i> | TATA-box    | 181            | 185           | core promoter element around -30 of transcription start           |
| <i>CsDof58</i> | TATA-box    | 202            | 208           | core promoter element around -30 of transcription start           |
| <i>CsDof58</i> | TATA-box    | 203            | 210           | core promoter element around -30 of transcription start           |
| <i>CsDof58</i> | TATA-box    | 204            | 210           | core promoter element around -30 of transcription start           |
| <i>CsDof58</i> | TATA-box    | 206            | 210           | core promoter element around -30 of transcription start           |
| <i>CsDof58</i> | TATA-box    | 693            | 702           | core promoter element around -30 of transcription start           |
| <i>CsDof58</i> | TATA-box    | 694            | 701           | core promoter element around -30 of transcription start           |
| <i>CsDof58</i> | TATA-box    | 695            | 701           | core promoter element around -30 of transcription start           |
| <i>CsDof58</i> | TATA-box    | 696            | 701           | core promoter element around -30 of transcription start           |
| <i>CsDof58</i> | TATA-box    | 697            | 701           | core promoter element around -30 of transcription start           |
| <i>CsDof58</i> | TATA-box    | 888            | 896           | core promoter element around -30 of transcription start           |
| <i>CsDof58</i> | TATA-box    | 911            | 916           | core promoter element around -30 of transcription start           |
| <i>CsDof58</i> | TATA-box    | 912            | 916           | core promoter element around -30 of transcription start           |
| <i>CsDof58</i> | TATA-box    | 1003           | 1007          | core promoter element around -30 of transcription start           |
| <i>CsDof58</i> | TATA-box    | 1021           | 1025          | core promoter element around -30 of transcription start           |
| <i>CsDof58</i> | TATA-box    | 1189           | 1195          | core promoter element around -30 of transcription start           |
| <i>CsDof58</i> | TATA-box    | 1190           | 1195          | core promoter element around -30 of transcription start           |
| <i>CsDof58</i> | TATA-box    | 1191           | 1195          | core promoter element around -30 of transcription start           |
| <i>CsDof58</i> | TATA-box    | 1269           | 1273          | core promoter element around -30 of transcription start           |
| <i>CsDof58</i> | TATA-box    | 1317           | 1323          | core promoter element around -30 of transcription start           |
| <i>CsDof58</i> | TATA-box    | 1318           | 1324          | core promoter element around -30 of transcription start           |
| <i>CsDof58</i> | TATA-box    | 1319           | 1325          | core promoter element around -30 of transcription start           |
| <i>CsDof58</i> | TATA-box    | 1320           | 1324          | core promoter element around -30 of transcription start           |
| <i>CsDof58</i> | TATA-box    | 1341           | 1348          | core promoter element around -30 of transcription start           |
| <i>CsDof58</i> | TATA-box    | 1342           | 1348          | core promoter element around -30 of transcription start           |
| <i>CsDof58</i> | TATA-box    | 1343           | 1348          | core promoter element around -30 of transcription start           |
| <i>CsDof58</i> | TATA-box    | 1344           | 1348          | core promoter element around -30 of transcription start           |
| <i>CsDof58</i> | TATA-box    | 1359           | 1367          | core promoter element around -30 of transcription start           |
| <i>CsDof58</i> | TATA-box    | 1440           | 1446          | core promoter element around -30 of transcription start           |
| <i>CsDof58</i> | TATA-box    | 1441           | 1446          | core promoter element around -30 of transcription start           |
| <i>CsDof58</i> | TATA-box    | 1442           | 1446          | core promoter element around -30 of transcription start           |
| <i>CsDof58</i> | TATA-box    | 1452           | 1456          | core promoter element around -30 of transcription start           |
| <i>CsDof58</i> | TATA-box    | 1557           | 1566          | core promoter element around -30 of transcription start           |
| <i>CsDof58</i> | TATA-box    | 1559           | 1563          | core promoter element around -30 of transcription start           |
| <i>CsDof58</i> | TATA-box    | 1620           | 1625          | core promoter element around -30 of transcription start           |



| Name           | Cis-element | Start position | Stop position | Function                                                             |
|----------------|-------------|----------------|---------------|----------------------------------------------------------------------|
| <i>CsDof58</i> | TATA-box    | 1621           | 1625          | core promoter element around -30 of transcription start              |
| <i>CsDof58</i> | TATA-box    | 1683           | 1690          | core promoter element around -30 of transcription start              |
| <i>CsDof58</i> | TATA-box    | 1686           | 1692          | core promoter element around -30 of transcription start              |
| <i>CsDof58</i> | TATA-box    | 1688           | 1692          | core promoter element around -30 of transcription start              |
| <i>CsDof58</i> | TATA-box    | 1694           | 1700          | core promoter element around -30 of transcription start              |
| <i>CsDof58</i> | TATA-box    | 1695           | 1700          | core promoter element around -30 of transcription start              |
| <i>CsDof58</i> | TATA-box    | 1696           | 1700          | core promoter element around -30 of transcription start              |
| <i>CsDof58</i> | TATA-box    | 1715           | 1721          | core promoter element around -30 of transcription start              |
| <i>CsDof58</i> | TATA-box    | 1716           | 1721          | core promoter element around -30 of transcription start              |
| <i>CsDof58</i> | TATA-box    | 1717           | 1721          | core promoter element around -30 of transcription start              |
| <i>CsDof58</i> | TATA-box    | 1745           | 1749          | core promoter element around -30 of transcription start              |
| <i>CsDof58</i> | TATA-box    | 1812           | 1818          | core promoter element around -30 of transcription start              |
| <i>CsDof58</i> | TATA-box    | 1814           | 1818          | core promoter element around -30 of transcription start              |
| <i>CsDof58</i> | TATA-box    | 1903           | 1911          | core promoter element around -30 of transcription start              |
| <i>CsDof58</i> | TATA-box    | 1906           | 1913          | core promoter element around -30 of transcription start              |
| <i>CsDof58</i> | TATA-box    | 1907           | 1913          | core promoter element around -30 of transcription start              |
| <i>CsDof58</i> | TATA-box    | 1908           | 1914          | core promoter element around -30 of transcription start              |
| <i>CsDof58</i> | TATA-box    | 1909           | 1913          | core promoter element around -30 of transcription start              |
| <i>CsDof58</i> | TATA-box    | 1960           | 1965          | core promoter element around -30 of transcription start              |
| <i>CsDof58</i> | TATA-box    | 1961           | 1965          | core promoter element around -30 of transcription start              |
| <i>CsDof58</i> | GT1-motif   | 551            | 557           | light responsive element                                             |
| <i>CsDof58</i> | GT1-motif   | 1068           | 1074          | light responsive element                                             |
| <i>CsDof58</i> | MBS         | 442            | 448           | MYB binding site involved in drought-inducibility                    |
| <i>CsDof58</i> | MBSI        | 868            | 879           | MYB binding site involved in flavonoid biosynthetic genes regulation |
| <i>CsDof58</i> | CCAAT-box   | 1148           | 1154          | MYBHv1 binding site                                                  |
| <i>CsDof59</i> | ABRE        | 1535           | 1541          | abscisic acid responsiveness                                         |
| <i>CsDof59</i> | ABRE        | 1536           | 1541          | abscisic acid responsiveness                                         |
| <i>CsDof59</i> | ABRE        | 1800           | 1805          | abscisic acid responsiveness                                         |
| <i>CsDof59</i> | LTR         | 532            | 538           | cis-acting element involved in low-temperature responsiveness        |
| <i>CsDof59</i> | ARE         | 1296           | 1302          | cis-acting regulatory element essential for the anaerobic induction  |
| <i>CsDof59</i> | ARE         | 1307           | 1313          | cis-acting regulatory element essential for the anaerobic induction  |
| <i>CsDof59</i> | ARE         | 1564           | 1570          | cis-acting regulatory element essential for the anaerobic induction  |
| <i>CsDof59</i> | ARE         | 1583           | 1589          | cis-acting regulatory element essential for the anaerobic induction  |
| <i>CsDof59</i> | circadian   | 511            | 520           | cis-acting regulatory element involved in circadian control          |
| <i>CsDof59</i> | G-Box       | 1535           | 1541          | cis-acting regulatory element involved in light responsiveness       |
| <i>CsDof59</i> | G-Box       | 1800           | 1806          | cis-acting regulatory element involved in light responsiveness       |
| <i>CsDof59</i> | G-box       | 1534           | 1542          | cis-acting regulatory element involved in light responsiveness       |
| <i>CsDof59</i> | G-box       | 1535           | 1541          | cis-acting regulatory element involved in light responsiveness       |
| <i>CsDof59</i> | O2-site     | 382            | 391           | cis-acting regulatory element involved in zein metabolism regulation |
| <i>CsDof59</i> | CAAT-box    | 821            | 826           | common cis-acting element in promoter and enhancer regions           |
| <i>CsDof59</i> | CAAT-box    | 863            | 868           | common cis-acting element in promoter and enhancer regions           |
| <i>CsDof59</i> | CAAT-box    | 1069           | 1074          | common cis-acting element in promoter and enhancer regions           |
| <i>CsDof59</i> | CAAT-box    | 1233           | 1238          | common cis-acting element in promoter and enhancer regions           |
| <i>CsDof59</i> | CAAT-box    | 1278           | 1283          | common cis-acting element in promoter and enhancer regions           |
| <i>CsDof59</i> | CAAT-box    | 1312           | 1317          | common cis-acting element in promoter and enhancer regions           |
| <i>CsDof59</i> | CAAT-box    | 1336           | 1341          | common cis-acting element in promoter and enhancer regions           |
| <i>CsDof59</i> | CAAT-box    | 1397           | 1402          | common cis-acting element in promoter and enhancer regions           |
| <i>CsDof59</i> | CAAT-box    | 1643           | 1648          | common cis-acting element in promoter and enhancer regions           |
| <i>CsDof59</i> | CAAT-box    | 1649           | 1654          | common cis-acting element in promoter and enhancer regions           |
| <i>CsDof59</i> | CAAT-box    | 1982           | 1987          | common cis-acting element in promoter and enhancer regions           |
| <i>CsDof59</i> | TATA-box    | 135            | 142           | core promoter element around -30 of transcription start              |

| <b>Name</b>    | <b>Cis-element</b> | <b>Start position</b> | <b>Stop position</b> | <b>Function</b>                                         |
|----------------|--------------------|-----------------------|----------------------|---------------------------------------------------------|
| <i>CsDof59</i> | TATA-box           | 599                   | 605                  | core promoter element around -30 of transcription start |
| <i>CsDof59</i> | TATA-box           | 600                   | 606                  | core promoter element around -30 of transcription start |
| <i>CsDof59</i> | TATA-box           | 601                   | 605                  | core promoter element around -30 of transcription start |
| <i>CsDof59</i> | TATA-box           | 626                   | 630                  | core promoter element around -30 of transcription start |
| <i>CsDof59</i> | TATA-box           | 716                   | 722                  | core promoter element around -30 of transcription start |
| <i>CsDof59</i> | TATA-box           | 717                   | 723                  | core promoter element around -30 of transcription start |
| <i>CsDof59</i> | TATA-box           | 718                   | 722                  | core promoter element around -30 of transcription start |
| <i>CsDof59</i> | TATA-box           | 929                   | 934                  | core promoter element around -30 of transcription start |
| <i>CsDof59</i> | TATA-box           | 930                   | 934                  | core promoter element around -30 of transcription start |
| <i>CsDof59</i> | TATA-box           | 957                   | 961                  | core promoter element around -30 of transcription start |
| <i>CsDof59</i> | TATA-box           | 984                   | 990                  | core promoter element around -30 of transcription start |
| <i>CsDof59</i> | TATA-box           | 985                   | 991                  | core promoter element around -30 of transcription start |
| <i>CsDof59</i> | TATA-box           | 986                   | 990                  | core promoter element around -30 of transcription start |
| <i>CsDof59</i> | TATA-box           | 1138                  | 1145                 | core promoter element around -30 of transcription start |
| <i>CsDof59</i> | TATA-box           | 1139                  | 1145                 | core promoter element around -30 of transcription start |
| <i>CsDof59</i> | TATA-box           | 1140                  | 1145                 | core promoter element around -30 of transcription start |
| <i>CsDof59</i> | TATA-box           | 1141                  | 1145                 | core promoter element around -30 of transcription start |
| <i>CsDof59</i> | TATA-box           | 1246                  | 1253                 | core promoter element around -30 of transcription start |
| <i>CsDof59</i> | TATA-box           | 1247                  | 1256                 | core promoter element around -30 of transcription start |
| <i>CsDof59</i> | TATA-box           | 1248                  | 1253                 | core promoter element around -30 of transcription start |
| <i>CsDof59</i> | TATA-box           | 1249                  | 1253                 | core promoter element around -30 of transcription start |
| <i>CsDof59</i> | TATA-box           | 1266                  | 1273                 | core promoter element around -30 of transcription start |
| <i>CsDof59</i> | TATA-box           | 1324                  | 1331                 | core promoter element around -30 of transcription start |
| <i>CsDof59</i> | TATA-box           | 1357                  | 1361                 | core promoter element around -30 of transcription start |
| <i>CsDof59</i> | TATA-box           | 1443                  | 1450                 | core promoter element around -30 of transcription start |
| <i>CsDof59</i> | TATA-box           | 1444                  | 1450                 | core promoter element around -30 of transcription start |
| <i>CsDof59</i> | TATA-box           | 1445                  | 1450                 | core promoter element around -30 of transcription start |
| <i>CsDof59</i> | TATA-box           | 1446                  | 1450                 | core promoter element around -30 of transcription start |
| <i>CsDof59</i> | TATA-box           | 1449                  | 1455                 | core promoter element around -30 of transcription start |
| <i>CsDof59</i> | TATA-box           | 1450                  | 1455                 | core promoter element around -30 of transcription start |
| <i>CsDof59</i> | TATA-box           | 1451                  | 1455                 | core promoter element around -30 of transcription start |
| <i>CsDof59</i> | TATA-box           | 1476                  | 1482                 | core promoter element around -30 of transcription start |
| <i>CsDof59</i> | TATA-box           | 1477                  | 1481                 | core promoter element around -30 of transcription start |
| <i>CsDof59</i> | TATA-box           | 1499                  | 1506                 | core promoter element around -30 of transcription start |
| <i>CsDof59</i> | TATA-box           | 1500                  | 1506                 | core promoter element around -30 of transcription start |
| <i>CsDof59</i> | TATA-box           | 1501                  | 1506                 | core promoter element around -30 of transcription start |
| <i>CsDof59</i> | TATA-box           | 1502                  | 1506                 | core promoter element around -30 of transcription start |
| <i>CsDof59</i> | TATA-box           | 1506                  | 1512                 | core promoter element around -30 of transcription start |
| <i>CsDof59</i> | TATA-box           | 1507                  | 1512                 | core promoter element around -30 of transcription start |
| <i>CsDof59</i> | TATA-box           | 1508                  | 1512                 | core promoter element around -30 of transcription start |
| <i>CsDof59</i> | TATA-box           | 1592                  | 1597                 | core promoter element around -30 of transcription start |
| <i>CsDof59</i> | TATA-box           | 1593                  | 1597                 | core promoter element around -30 of transcription start |
| <i>CsDof59</i> | TATA-box           | 1659                  | 1663                 | core promoter element around -30 of transcription start |
| <i>CsDof59</i> | TATA-box           | 1688                  | 1692                 | core promoter element around -30 of transcription start |
| <i>CsDof59</i> | TATA-box           | 1786                  | 1793                 | core promoter element around -30 of transcription start |
| <i>CsDof59</i> | TATA-box           | 1873                  | 1879                 | core promoter element around -30 of transcription start |
| <i>CsDof59</i> | TATA-box           | 1874                  | 1880                 | core promoter element around -30 of transcription start |
| <i>CsDof59</i> | TATA-box           | 1875                  | 1879                 | core promoter element around -30 of transcription start |
| <i>CsDof59</i> | TATA-box           | 1939                  | 1944                 | core promoter element around -30 of transcription start |
| <i>CsDof59</i> | TATA-box           | 1940                  | 1944                 | core promoter element around -30 of transcription start |
| <i>CsDof59</i> | GT1-motif          | 1421                  | 1428                 | light responsive element                                |

| Name           | Cis-element | Start position | Stop position | Function                                                             |
|----------------|-------------|----------------|---------------|----------------------------------------------------------------------|
| <i>CsDof60</i> | ABRE        | 438            | 447           | abscisic acid responsiveness                                         |
| <i>CsDof60</i> | ABRE        | 440            | 445           | abscisic acid responsiveness                                         |
| <i>CsDof60</i> | ABRE        | 1663           | 1669          | abscisic acid responsiveness                                         |
| <i>CsDof60</i> | ABRE        | 1664           | 1669          | abscisic acid responsiveness                                         |
| <i>CsDof60</i> | ABRE        | 1674           | 1679          | abscisic acid responsiveness                                         |
| <i>CsDof60</i> | ARE         | 770            | 776           | cis-acting regulatory element essential for the anaerobic induction  |
| <i>CsDof60</i> | ARE         | 831            | 837           | cis-acting regulatory element essential for the anaerobic induction  |
| <i>CsDof60</i> | G-box       | 192            | 198           | cis-acting regulatory element involved in light responsiveness       |
| <i>CsDof60</i> | G-box       | 411            | 417           | cis-acting regulatory element involved in light responsiveness       |
| <i>CsDof60</i> | G-box       | 440            | 446           | cis-acting regulatory element involved in light responsiveness       |
| <i>CsDof60</i> | G-box       | 1177           | 1183          | cis-acting regulatory element involved in light responsiveness       |
| <i>CsDof60</i> | G-box       | 1663           | 1669          | cis-acting regulatory element involved in light responsiveness       |
| <i>CsDof60</i> | G-box       | 1673           | 1679          | cis-acting regulatory element involved in light responsiveness       |
| <i>CsDof60</i> | G-Box       | 1663           | 1669          | cis-acting regulatory element involved in light responsiveness       |
| <i>CsDof60</i> | TGACG-motif | 1672           | 1677          | cis-acting regulatory element involved in the MeJA-responsiveness    |
| <i>CsDof60</i> | CGTCA-motif | 1672           | 1677          | cis-acting regulatory element involved in the MeJA-responsiveness    |
| <i>CsDof60</i> | O2-site     | 611            | 619           | cis-acting regulatory element involved in zein metabolism regulation |
| <i>CsDof60</i> | CAT-box     | 782            | 788           | cis-acting regulatory element related to meristem expression         |
| <i>CsDof60</i> | CAAT-box    | 265            | 270           | common cis-acting element in promoter and enhancer regions           |
| <i>CsDof60</i> | CAAT-box    | 272            | 277           | common cis-acting element in promoter and enhancer regions           |
| <i>CsDof60</i> | CAAT-box    | 353            | 358           | common cis-acting element in promoter and enhancer regions           |
| <i>CsDof60</i> | CAAT-box    | 522            | 527           | common cis-acting element in promoter and enhancer regions           |
| <i>CsDof60</i> | CAAT-box    | 615            | 620           | common cis-acting element in promoter and enhancer regions           |
| <i>CsDof60</i> | CAAT-box    | 631            | 636           | common cis-acting element in promoter and enhancer regions           |
| <i>CsDof60</i> | CAAT-box    | 757            | 762           | common cis-acting element in promoter and enhancer regions           |
| <i>CsDof60</i> | CAAT-box    | 829            | 834           | common cis-acting element in promoter and enhancer regions           |
| <i>CsDof60</i> | CAAT-box    | 843            | 848           | common cis-acting element in promoter and enhancer regions           |
| <i>CsDof60</i> | CAAT-box    | 848            | 853           | common cis-acting element in promoter and enhancer regions           |
| <i>CsDof60</i> | CAAT-box    | 1035           | 1040          | common cis-acting element in promoter and enhancer regions           |
| <i>CsDof60</i> | CAAT-box    | 1042           | 1047          | common cis-acting element in promoter and enhancer regions           |
| <i>CsDof60</i> | CAAT-box    | 1139           | 1144          | common cis-acting element in promoter and enhancer regions           |
| <i>CsDof60</i> | CAAT-box    | 1184           | 1189          | common cis-acting element in promoter and enhancer regions           |
| <i>CsDof60</i> | CAAT-box    | 1291           | 1296          | common cis-acting element in promoter and enhancer regions           |
| <i>CsDof60</i> | CAAT-box    | 1307           | 1312          | common cis-acting element in promoter and enhancer regions           |
| <i>CsDof60</i> | CAAT-box    | 1684           | 1689          | common cis-acting element in promoter and enhancer regions           |
| <i>CsDof60</i> | CAAT-box    | 1791           | 1796          | common cis-acting element in promoter and enhancer regions           |
| <i>CsDof60</i> | CAAT-box    | 1887           | 1892          | common cis-acting element in promoter and enhancer regions           |
| <i>CsDof60</i> | TATA-box    | 213            | 219           | core promoter element around -30 of transcription start              |
| <i>CsDof60</i> | TATA-box    | 214            | 218           | core promoter element around -30 of transcription start              |
| <i>CsDof60</i> | TATA-box    | 256            | 262           | core promoter element around -30 of transcription start              |
| <i>CsDof60</i> | TATA-box    | 257            | 264           | core promoter element around -30 of transcription start              |
| <i>CsDof60</i> | TATA-box    | 258            | 264           | core promoter element around -30 of transcription start              |
| <i>CsDof60</i> | TATA-box    | 259            | 265           | core promoter element around -30 of transcription start              |
| <i>CsDof60</i> | TATA-box    | 260            | 266           | core promoter element around -30 of transcription start              |
| <i>CsDof60</i> | TATA-box    | 261            | 267           | core promoter element around -30 of transcription start              |
| <i>CsDof60</i> | TATA-box    | 262            | 266           | core promoter element around -30 of transcription start              |
| <i>CsDof60</i> | TATA-box    | 303            | 309           | core promoter element around -30 of transcription start              |
| <i>CsDof60</i> | TATA-box    | 304            | 310           | core promoter element around -30 of transcription start              |
| <i>CsDof60</i> | TATA-box    | 305            | 311           | core promoter element around -30 of transcription start              |
| <i>CsDof60</i> | TATA-box    | 306            | 310           | core promoter element around -30 of transcription start              |
| <i>CsDof60</i> | TATA-box    | 577            | 581           | core promoter element around -30 of transcription start              |

| Name           | Cis-element | Start position | Stop position | Function                                                      |
|----------------|-------------|----------------|---------------|---------------------------------------------------------------|
| <i>CsDof60</i> | TATA-box    | 633            | 642           | core promoter element around -30 of transcription start       |
| <i>CsDof60</i> | TATA-box    | 634            | 641           | core promoter element around -30 of transcription start       |
| <i>CsDof60</i> | TATA-box    | 635            | 641           | core promoter element around -30 of transcription start       |
| <i>CsDof60</i> | TATA-box    | 636            | 643           | core promoter element around -30 of transcription start       |
| <i>CsDof60</i> | TATA-box    | 637            | 643           | core promoter element around -30 of transcription start       |
| <i>CsDof60</i> | TATA-box    | 638            | 644           | core promoter element around -30 of transcription start       |
| <i>CsDof60</i> | TATA-box    | 639            | 643           | core promoter element around -30 of transcription start       |
| <i>CsDof60</i> | TATA-box    | 695            | 701           | core promoter element around -30 of transcription start       |
| <i>CsDof60</i> | TATA-box    | 696            | 701           | core promoter element around -30 of transcription start       |
| <i>CsDof60</i> | TATA-box    | 697            | 701           | core promoter element around -30 of transcription start       |
| <i>CsDof60</i> | TATA-box    | 738            | 744           | core promoter element around -30 of transcription start       |
| <i>CsDof60</i> | TATA-box    | 739            | 746           | core promoter element around -30 of transcription start       |
| <i>CsDof60</i> | TATA-box    | 740            | 746           | core promoter element around -30 of transcription start       |
| <i>CsDof60</i> | TATA-box    | 741            | 747           | core promoter element around -30 of transcription start       |
| <i>CsDof60</i> | TATA-box    | 742            | 746           | core promoter element around -30 of transcription start       |
| <i>CsDof60</i> | TATA-box    | 761            | 769           | core promoter element around -30 of transcription start       |
| <i>CsDof60</i> | TATA-box    | 763            | 772           | core promoter element around -30 of transcription start       |
| <i>CsDof60</i> | TATA-box    | 764            | 769           | core promoter element around -30 of transcription start       |
| <i>CsDof60</i> | TATA-box    | 765            | 769           | core promoter element around -30 of transcription start       |
| <i>CsDof60</i> | TATA-box    | 948            | 954           | core promoter element around -30 of transcription start       |
| <i>CsDof60</i> | TATA-box    | 949            | 953           | core promoter element around -30 of transcription start       |
| <i>CsDof60</i> | TATA-box    | 953            | 960           | core promoter element around -30 of transcription start       |
| <i>CsDof60</i> | TATA-box    | 954            | 960           | core promoter element around -30 of transcription start       |
| <i>CsDof60</i> | TATA-box    | 955            | 960           | core promoter element around -30 of transcription start       |
| <i>CsDof60</i> | TATA-box    | 956            | 960           | core promoter element around -30 of transcription start       |
| <i>CsDof60</i> | TATA-box    | 974            | 979           | core promoter element around -30 of transcription start       |
| <i>CsDof60</i> | TATA-box    | 975            | 979           | core promoter element around -30 of transcription start       |
| <i>CsDof60</i> | TATA-box    | 1045           | 1051          | core promoter element around -30 of transcription start       |
| <i>CsDof60</i> | TATA-box    | 1046           | 1050          | core promoter element around -30 of transcription start       |
| <i>CsDof60</i> | TATA-box    | 1082           | 1089          | core promoter element around -30 of transcription start       |
| <i>CsDof60</i> | TATA-box    | 1213           | 1219          | core promoter element around -30 of transcription start       |
| <i>CsDof60</i> | TATA-box    | 1214           | 1219          | core promoter element around -30 of transcription start       |
| <i>CsDof60</i> | TATA-box    | 1215           | 1219          | core promoter element around -30 of transcription start       |
| <i>CsDof60</i> | TATA-box    | 1269           | 1273          | core promoter element around -30 of transcription start       |
| <i>CsDof60</i> | TATA-box    | 1300           | 1306          | core promoter element around -30 of transcription start       |
| <i>CsDof60</i> | TATA-box    | 1301           | 1306          | core promoter element around -30 of transcription start       |
| <i>CsDof60</i> | TATA-box    | 1302           | 1306          | core promoter element around -30 of transcription start       |
| <i>CsDof60</i> | TATA-box    | 1320           | 1324          | core promoter element around -30 of transcription start       |
| <i>CsDof60</i> | TATA-box    | 1325           | 1331          | core promoter element around -30 of transcription start       |
| <i>CsDof60</i> | TATA-box    | 1326           | 1331          | core promoter element around -30 of transcription start       |
| <i>CsDof60</i> | TATA-box    | 1327           | 1331          | core promoter element around -30 of transcription start       |
| <i>CsDof60</i> | TATA-box    | 1355           | 1361          | core promoter element around -30 of transcription start       |
| <i>CsDof60</i> | TATA-box    | 1356           | 1360          | core promoter element around -30 of transcription start       |
| <i>CsDof60</i> | TATA-box    | 1421           | 1428          | core promoter element around -30 of transcription start       |
| <i>CsDof60</i> | TATA-box    | 1637           | 1644          | core promoter element around -30 of transcription start       |
| <i>CsDof60</i> | MBS         | 968            | 974           | MYB binding site involved in drought-inducibility             |
| <i>CsDof60</i> | MRE         | 1277           | 1284          | MYB binding site involved in light responsiveness             |
| <i>CsDof61</i> | ABRE        | 1694           | 1699          | abscisic acid responsiveness                                  |
| <i>CsDof61</i> | TGA-element | 1142           | 1148          | auxin-responsive element                                      |
| <i>CsDof61</i> | LTR         | 180            | 186           | cis-acting element involved in low-temperature responsiveness |
| <i>CsDof61</i> | LTR         | 1231           | 1237          | cis-acting element involved in low-temperature responsiveness |

| Name           | Cis-element | Start position | Stop position | Function                                                              |
|----------------|-------------|----------------|---------------|-----------------------------------------------------------------------|
| <i>CsDof61</i> | Unnamed_1   | 213            | 224           | cis-acting element involved in phytochrome down-regulation expression |
| <i>CsDof61</i> | ARE         | 798            | 804           | cis-acting regulatory element essential for the anaerobic induction   |
| <i>CsDof61</i> | AuxRR-core  | 935            | 942           | cis-acting regulatory element involved in auxin responsiveness        |
| <i>CsDof61</i> | G-box       | 34             | 40            | cis-acting regulatory element involved in light responsiveness        |
| <i>CsDof61</i> | G-Box       | 1694           | 1700          | cis-acting regulatory element involved in light responsiveness        |
| <i>CsDof61</i> | CAT-box     | 1206           | 1212          | cis-acting regulatory element related to meristem expression          |
| <i>CsDof61</i> | CAAT-box    | 150            | 155           | common cis-acting element in promoter and enhancer regions            |
| <i>CsDof61</i> | CAAT-box    | 197            | 202           | common cis-acting element in promoter and enhancer regions            |
| <i>CsDof61</i> | CAAT-box    | 281            | 286           | common cis-acting element in promoter and enhancer regions            |
| <i>CsDof61</i> | CAAT-box    | 535            | 540           | common cis-acting element in promoter and enhancer regions            |
| <i>CsDof61</i> | CAAT-box    | 548            | 553           | common cis-acting element in promoter and enhancer regions            |
| <i>CsDof61</i> | CAAT-box    | 558            | 563           | common cis-acting element in promoter and enhancer regions            |
| <i>CsDof61</i> | CAAT-box    | 805            | 810           | common cis-acting element in promoter and enhancer regions            |
| <i>CsDof61</i> | CAAT-box    | 820            | 825           | common cis-acting element in promoter and enhancer regions            |
| <i>CsDof61</i> | CAAT-box    | 959            | 964           | common cis-acting element in promoter and enhancer regions            |
| <i>CsDof61</i> | CAAT-box    | 1004           | 1009          | common cis-acting element in promoter and enhancer regions            |
| <i>CsDof61</i> | CAAT-box    | 1135           | 1140          | common cis-acting element in promoter and enhancer regions            |
| <i>CsDof61</i> | CAAT-box    | 1198           | 1203          | common cis-acting element in promoter and enhancer regions            |
| <i>CsDof61</i> | CAAT-box    | 1334           | 1339          | common cis-acting element in promoter and enhancer regions            |
| <i>CsDof61</i> | CAAT-box    | 1407           | 1412          | common cis-acting element in promoter and enhancer regions            |
| <i>CsDof61</i> | CAAT-box    | 1474           | 1479          | common cis-acting element in promoter and enhancer regions            |
| <i>CsDof61</i> | CAAT-box    | 1482           | 1487          | common cis-acting element in promoter and enhancer regions            |
| <i>CsDof61</i> | CAAT-box    | 1573           | 1578          | common cis-acting element in promoter and enhancer regions            |
| <i>CsDof61</i> | CAAT-box    | 1689           | 1694          | common cis-acting element in promoter and enhancer regions            |
| <i>CsDof61</i> | CAAT-box    | 1704           | 1709          | common cis-acting element in promoter and enhancer regions            |
| <i>CsDof61</i> | TATA-box    | 62             | 68            | core promoter element around -30 of transcription start               |
| <i>CsDof61</i> | TATA-box    | 63             | 69            | core promoter element around -30 of transcription start               |
| <i>CsDof61</i> | TATA-box    | 64             | 70            | core promoter element around -30 of transcription start               |
| <i>CsDof61</i> | TATA-box    | 65             | 71            | core promoter element around -30 of transcription start               |
| <i>CsDof61</i> | TATA-box    | 67             | 71            | core promoter element around -30 of transcription start               |
| <i>CsDof61</i> | TATA-box    | 84             | 88            | core promoter element around -30 of transcription start               |
| <i>CsDof61</i> | TATA-box    | 89             | 95            | core promoter element around -30 of transcription start               |
| <i>CsDof61</i> | TATA-box    | 90             | 95            | core promoter element around -30 of transcription start               |
| <i>CsDof61</i> | TATA-box    | 91             | 95            | core promoter element around -30 of transcription start               |
| <i>CsDof61</i> | TATA-box    | 104            | 108           | core promoter element around -30 of transcription start               |
| <i>CsDof61</i> | TATA-box    | 109            | 113           | core promoter element around -30 of transcription start               |
| <i>CsDof61</i> | TATA-box    | 260            | 266           | core promoter element around -30 of transcription start               |
| <i>CsDof61</i> | TATA-box    | 262            | 266           | core promoter element around -30 of transcription start               |
| <i>CsDof61</i> | TATA-box    | 337            | 343           | core promoter element around -30 of transcription start               |
| <i>CsDof61</i> | TATA-box    | 338            | 344           | core promoter element around -30 of transcription start               |
| <i>CsDof61</i> | TATA-box    | 339            | 345           | core promoter element around -30 of transcription start               |
| <i>CsDof61</i> | TATA-box    | 340            | 344           | core promoter element around -30 of transcription start               |
| <i>CsDof61</i> | TATA-box    | 379            | 387           | core promoter element around -30 of transcription start               |
| <i>CsDof61</i> | TATA-box    | 387            | 393           | core promoter element around -30 of transcription start               |
| <i>CsDof61</i> | TATA-box    | 388            | 392           | core promoter element around -30 of transcription start               |
| <i>CsDof61</i> | TATA-box    | 466            | 470           | core promoter element around -30 of transcription start               |
| <i>CsDof61</i> | TATA-box    | 528            | 535           | core promoter element around -30 of transcription start               |
| <i>CsDof61</i> | TATA-box    | 666            | 670           | core promoter element around -30 of transcription start               |
| <i>CsDof61</i> | TATA-box    | 753            | 757           | core promoter element around -30 of transcription start               |
| <i>CsDof61</i> | TATA-box    | 814            | 820           | core promoter element around -30 of transcription start               |
| <i>CsDof61</i> | TATA-box    | 815            | 819           | core promoter element around -30 of transcription start               |

| Name           | Cis-element      | Start position | Stop position | Function                                                      |
|----------------|------------------|----------------|---------------|---------------------------------------------------------------|
| <i>CsDof61</i> | TATA-box         | 889            | 895           | core promoter element around -30 of transcription start       |
| <i>CsDof61</i> | TATA-box         | 890            | 894           | core promoter element around -30 of transcription start       |
| <i>CsDof61</i> | TATA-box         | 1115           | 1119          | core promoter element around -30 of transcription start       |
| <i>CsDof61</i> | TATA-box         | 1162           | 1171          | core promoter element around -30 of transcription start       |
| <i>CsDof61</i> | TATA-box         | 1163           | 1170          | core promoter element around -30 of transcription start       |
| <i>CsDof61</i> | TATA-box         | 1164           | 1170          | core promoter element around -30 of transcription start       |
| <i>CsDof61</i> | TATA-box         | 1165           | 1172          | core promoter element around -30 of transcription start       |
| <i>CsDof61</i> | TATA-box         | 1166           | 1172          | core promoter element around -30 of transcription start       |
| <i>CsDof61</i> | TATA-box         | 1167           | 1173          | core promoter element around -30 of transcription start       |
| <i>CsDof61</i> | TATA-box         | 1168           | 1174          | core promoter element around -30 of transcription start       |
| <i>CsDof61</i> | TATA-box         | 1169           | 1175          | core promoter element around -30 of transcription start       |
| <i>CsDof61</i> | TATA-box         | 1170           | 1174          | core promoter element around -30 of transcription start       |
| <i>CsDof61</i> | TATA-box         | 1244           | 1249          | core promoter element around -30 of transcription start       |
| <i>CsDof61</i> | TATA-box         | 1245           | 1249          | core promoter element around -30 of transcription start       |
| <i>CsDof61</i> | TATA-box         | 1260           | 1267          | core promoter element around -30 of transcription start       |
| <i>CsDof61</i> | TATA-box         | 1273           | 1280          | core promoter element around -30 of transcription start       |
| <i>CsDof61</i> | TATA-box         | 1274           | 1280          | core promoter element around -30 of transcription start       |
| <i>CsDof61</i> | TATA-box         | 1275           | 1280          | core promoter element around -30 of transcription start       |
| <i>CsDof61</i> | TATA-box         | 1276           | 1280          | core promoter element around -30 of transcription start       |
| <i>CsDof61</i> | TATA-box         | 1375           | 1381          | core promoter element around -30 of transcription start       |
| <i>CsDof61</i> | TATA-box         | 1376           | 1381          | core promoter element around -30 of transcription start       |
| <i>CsDof61</i> | TATA-box         | 1377           | 1381          | core promoter element around -30 of transcription start       |
| <i>CsDof61</i> | TATA-box         | 1389           | 1395          | core promoter element around -30 of transcription start       |
| <i>CsDof61</i> | TATA-box         | 1390           | 1396          | core promoter element around -30 of transcription start       |
| <i>CsDof61</i> | TATA-box         | 1391           | 1397          | core promoter element around -30 of transcription start       |
| <i>CsDof61</i> | TATA-box         | 1392           | 1396          | core promoter element around -30 of transcription start       |
| <i>CsDof61</i> | TATA-box         | 1421           | 1429          | core promoter element around -30 of transcription start       |
| <i>CsDof61</i> | TATA-box         | 1560           | 1568          | core promoter element around -30 of transcription start       |
| <i>CsDof61</i> | TATA-box         | 1612           | 1619          | core promoter element around -30 of transcription start       |
| <i>CsDof61</i> | TATA-box         | 1613           | 1619          | core promoter element around -30 of transcription start       |
| <i>CsDof61</i> | TATA-box         | 1614           | 1619          | core promoter element around -30 of transcription start       |
| <i>CsDof61</i> | TATA-box         | 1615           | 1619          | core promoter element around -30 of transcription start       |
| <i>CsDof61</i> | TATA-box         | 1651           | 1657          | core promoter element around -30 of transcription start       |
| <i>CsDof61</i> | TATA-box         | 1652           | 1657          | core promoter element around -30 of transcription start       |
| <i>CsDof61</i> | TATA-box         | 1653           | 1657          | core promoter element around -30 of transcription start       |
| <i>CsDof61</i> | TATA-box         | 1778           | 1782          | core promoter element around -30 of transcription start       |
| <i>CsDof61</i> | TATA-box         | 1835           | 1841          | core promoter element around -30 of transcription start       |
| <i>CsDof61</i> | TATA-box         | 1837           | 1843          | core promoter element around -30 of transcription start       |
| <i>CsDof61</i> | TATA-box         | 1838           | 1844          | core promoter element around -30 of transcription start       |
| <i>CsDof61</i> | TATA-box         | 1839           | 1845          | core promoter element around -30 of transcription start       |
| <i>CsDof61</i> | TATA-box         | 1841           | 1845          | core promoter element around -30 of transcription start       |
| <i>CsDof61</i> | AT-rich sequence | 413            | 422           | element for maximal elicitor-mediated activation (2copies)    |
| <i>CsDof61</i> | P-box            | 1861           | 1868          | gibberellin-responsive element                                |
| <i>CsDof61</i> | GT1-motif        | 744            | 750           | light responsive element                                      |
| <i>CsDof61</i> | GT1-motif        | 1184           | 1190          | light responsive element                                      |
| <i>CsDof61</i> | CCAAT-box        | 995            | 1001          | MYBHv1 binding site                                           |
| <i>CsDof62</i> | ABRE             | 213            | 218           | abscisic acid responsiveness                                  |
| <i>CsDof62</i> | ABRE             | 339            | 345           | abscisic acid responsiveness                                  |
| <i>CsDof62</i> | ABRE             | 340            | 345           | abscisic acid responsiveness                                  |
| <i>CsDof62</i> | ABRE             | 481            | 486           | abscisic acid responsiveness                                  |
| <i>CsDof62</i> | LTR              | 1655           | 1661          | cis-acting element involved in low-temperature responsiveness |

| Name           | Cis-element | Start position | Stop position | Function                                                          |
|----------------|-------------|----------------|---------------|-------------------------------------------------------------------|
| <i>CsDof62</i> | TCA-element | 449            | 458           | cis-acting element involved in salicylic acid responsiveness      |
| <i>CsDof62</i> | TCA-element | 1863           | 1872          | cis-acting element involved in salicylic acid responsiveness      |
| <i>CsDof62</i> | G-Box       | 339            | 345           | cis-acting regulatory element involved in light responsiveness    |
| <i>CsDof62</i> | G-box       | 212            | 218           | cis-acting regulatory element involved in light responsiveness    |
| <i>CsDof62</i> | G-box       | 337            | 346           | cis-acting regulatory element involved in light responsiveness    |
| <i>CsDof62</i> | G-box       | 339            | 345           | cis-acting regulatory element involved in light responsiveness    |
| <i>CsDof62</i> | G-box       | 480            | 486           | cis-acting regulatory element involved in light responsiveness    |
| <i>CsDof62</i> | CGTCA-motif | 211            | 216           | cis-acting regulatory element involved in the MeJA-responsiveness |
| <i>CsDof62</i> | CGTCA-motif | 479            | 484           | cis-acting regulatory element involved in the MeJA-responsiveness |
| <i>CsDof62</i> | CGTCA-motif | 1803           | 1808          | cis-acting regulatory element involved in the MeJA-responsiveness |
| <i>CsDof62</i> | TGACG-motif | 211            | 216           | cis-acting regulatory element involved in the MeJA-responsiveness |
| <i>CsDof62</i> | TGACG-motif | 479            | 484           | cis-acting regulatory element involved in the MeJA-responsiveness |
| <i>CsDof62</i> | TGACG-motif | 1803           | 1808          | cis-acting regulatory element involved in the MeJA-responsiveness |
| <i>CsDof62</i> | CAT-box     | 744            | 750           | cis-acting regulatory element related to meristem expression      |
| <i>CsDof62</i> | CAAT-box    | 70             | 75            | common cis-acting element in promoter and enhancer regions        |
| <i>CsDof62</i> | CAAT-box    | 122            | 127           | common cis-acting element in promoter and enhancer regions        |
| <i>CsDof62</i> | CAAT-box    | 148            | 153           | common cis-acting element in promoter and enhancer regions        |
| <i>CsDof62</i> | CAAT-box    | 178            | 183           | common cis-acting element in promoter and enhancer regions        |
| <i>CsDof62</i> | CAAT-box    | 297            | 302           | common cis-acting element in promoter and enhancer regions        |
| <i>CsDof62</i> | CAAT-box    | 386            | 391           | common cis-acting element in promoter and enhancer regions        |
| <i>CsDof62</i> | CAAT-box    | 433            | 438           | common cis-acting element in promoter and enhancer regions        |
| <i>CsDof62</i> | CAAT-box    | 444            | 449           | common cis-acting element in promoter and enhancer regions        |
| <i>CsDof62</i> | CAAT-box    | 718            | 723           | common cis-acting element in promoter and enhancer regions        |
| <i>CsDof62</i> | CAAT-box    | 785            | 790           | common cis-acting element in promoter and enhancer regions        |
| <i>CsDof62</i> | CAAT-box    | 839            | 844           | common cis-acting element in promoter and enhancer regions        |
| <i>CsDof62</i> | CAAT-box    | 872            | 877           | common cis-acting element in promoter and enhancer regions        |
| <i>CsDof62</i> | CAAT-box    | 927            | 932           | common cis-acting element in promoter and enhancer regions        |
| <i>CsDof62</i> | CAAT-box    | 1307           | 1312          | common cis-acting element in promoter and enhancer regions        |
| <i>CsDof62</i> | CAAT-box    | 1397           | 1402          | common cis-acting element in promoter and enhancer regions        |
| <i>CsDof62</i> | CAAT-box    | 1607           | 1612          | common cis-acting element in promoter and enhancer regions        |
| <i>CsDof62</i> | CAAT-box    | 1638           | 1643          | common cis-acting element in promoter and enhancer regions        |
| <i>CsDof62</i> | CAAT-box    | 1666           | 1671          | common cis-acting element in promoter and enhancer regions        |
| <i>CsDof62</i> | CAAT-box    | 1710           | 1715          | common cis-acting element in promoter and enhancer regions        |
| <i>CsDof62</i> | CAAT-box    | 1722           | 1727          | common cis-acting element in promoter and enhancer regions        |
| <i>CsDof62</i> | CAAT-box    | 1807           | 1812          | common cis-acting element in promoter and enhancer regions        |
| <i>CsDof62</i> | TATA-box    | 13             | 17            | core promoter element around -30 of transcription start           |
| <i>CsDof62</i> | TATA-box    | 84             | 91            | core promoter element around -30 of transcription start           |
| <i>CsDof62</i> | TATA-box    | 204            | 208           | core promoter element around -30 of transcription start           |
| <i>CsDof62</i> | TATA-box    | 517            | 522           | core promoter element around -30 of transcription start           |
| <i>CsDof62</i> | TATA-box    | 518            | 522           | core promoter element around -30 of transcription start           |
| <i>CsDof62</i> | TATA-box    | 556            | 565           | core promoter element around -30 of transcription start           |
| <i>CsDof62</i> | TATA-box    | 562            | 566           | core promoter element around -30 of transcription start           |
| <i>CsDof62</i> | TATA-box    | 674            | 680           | core promoter element around -30 of transcription start           |
| <i>CsDof62</i> | TATA-box    | 675            | 681           | core promoter element around -30 of transcription start           |
| <i>CsDof62</i> | TATA-box    | 677            | 681           | core promoter element around -30 of transcription start           |
| <i>CsDof62</i> | TATA-box    | 696            | 700           | core promoter element around -30 of transcription start           |
| <i>CsDof62</i> | TATA-box    | 753            | 757           | core promoter element around -30 of transcription start           |
| <i>CsDof62</i> | TATA-box    | 798            | 804           | core promoter element around -30 of transcription start           |
| <i>CsDof62</i> | TATA-box    | 799            | 805           | core promoter element around -30 of transcription start           |
| <i>CsDof62</i> | TATA-box    | 801            | 805           | core promoter element around -30 of transcription start           |
| <i>CsDof62</i> | TATA-box    | 863            | 869           | core promoter element around -30 of transcription start           |





| Name           | Cis-element     | Start position | Stop position | Function                                                             |
|----------------|-----------------|----------------|---------------|----------------------------------------------------------------------|
| <i>CsDof62</i> | HD-Zip 1        | 1602           | 1610          | element involved in differentiation of the palisade mesophyll cells  |
| <i>CsDof62</i> | P-box           | 845            | 852           | gibberellin-responsive element                                       |
| <i>CsDof62</i> | AAAC-motif      | 902            | 913           | light responsive element                                             |
| <i>CsDof62</i> | GT1-motif       | 427            | 433           | light responsive element                                             |
| <i>CsDof62</i> | GT1-motif       | 1376           | 1383          | light responsive element                                             |
| <i>CsDof62</i> | GT1-motif       | 1377           | 1383          | light responsive element                                             |
| <i>CsDof63</i> | ABRE            | 1373           | 1378          | abscisic acid responsiveness                                         |
| <i>CsDof63</i> | AT-rich element | 491            | 501           | binding site of AT-rich DNA binding protein (ATBP-1)                 |
| <i>CsDof63</i> | TC-rich repeats | 1345           | 1354          | cis-acting element involved in defense and stress responsiveness     |
| <i>CsDof63</i> | LTR             | 447            | 453           | cis-acting element involved in low-temperature responsiveness        |
| <i>CsDof63</i> | TCA-element     | 190            | 199           | cis-acting element involved in salicylic acid responsiveness         |
| <i>CsDof63</i> | ARE             | 462            | 468           | cis-acting regulatory element essential for the anaerobic induction  |
| <i>CsDof63</i> | ARE             | 509            | 515           | cis-acting regulatory element essential for the anaerobic induction  |
| <i>CsDof63</i> | ARE             | 526            | 532           | cis-acting regulatory element essential for the anaerobic induction  |
| <i>CsDof63</i> | ARE             | 736            | 742           | cis-acting regulatory element essential for the anaerobic induction  |
| <i>CsDof63</i> | ARE             | 1908           | 1914          | cis-acting regulatory element essential for the anaerobic induction  |
| <i>CsDof63</i> | G-box           | 59             | 65            | cis-acting regulatory element involved in light responsiveness       |
| <i>CsDof63</i> | G-box           | 1373           | 1379          | cis-acting regulatory element involved in light responsiveness       |
| <i>CsDof63</i> | TGACG-motif     | 284            | 289           | cis-acting regulatory element involved in the MeJA-responsiveness    |
| <i>CsDof63</i> | CGTCA-motif     | 284            | 289           | cis-acting regulatory element involved in the MeJA-responsiveness    |
| <i>CsDof63</i> | O2-site         | 1847           | 1856          | cis-acting regulatory element involved in zein metabolism regulation |
| <i>CsDof63</i> | CAAT-box        | 127            | 132           | common cis-acting element in promoter and enhancer regions           |
| <i>CsDof63</i> | CAAT-box        | 465            | 470           | common cis-acting element in promoter and enhancer regions           |
| <i>CsDof63</i> | CAAT-box        | 504            | 509           | common cis-acting element in promoter and enhancer regions           |
| <i>CsDof63</i> | CAAT-box        | 599            | 604           | common cis-acting element in promoter and enhancer regions           |
| <i>CsDof63</i> | CAAT-box        | 734            | 739           | common cis-acting element in promoter and enhancer regions           |
| <i>CsDof63</i> | CAAT-box        | 768            | 773           | common cis-acting element in promoter and enhancer regions           |
| <i>CsDof63</i> | CAAT-box        | 798            | 803           | common cis-acting element in promoter and enhancer regions           |
| <i>CsDof63</i> | CAAT-box        | 825            | 830           | common cis-acting element in promoter and enhancer regions           |
| <i>CsDof63</i> | CAAT-box        | 1016           | 1021          | common cis-acting element in promoter and enhancer regions           |
| <i>CsDof63</i> | CAAT-box        | 1173           | 1178          | common cis-acting element in promoter and enhancer regions           |
| <i>CsDof63</i> | CAAT-box        | 1329           | 1334          | common cis-acting element in promoter and enhancer regions           |
| <i>CsDof63</i> | CAAT-box        | 1358           | 1363          | common cis-acting element in promoter and enhancer regions           |
| <i>CsDof63</i> | CAAT-box        | 1473           | 1478          | common cis-acting element in promoter and enhancer regions           |
| <i>CsDof63</i> | CAAT-box        | 1480           | 1485          | common cis-acting element in promoter and enhancer regions           |
| <i>CsDof63</i> | CAAT-box        | 1494           | 1499          | common cis-acting element in promoter and enhancer regions           |
| <i>CsDof63</i> | CAAT-box        | 1530           | 1535          | common cis-acting element in promoter and enhancer regions           |
| <i>CsDof63</i> | CAAT-box        | 1685           | 1690          | common cis-acting element in promoter and enhancer regions           |
| <i>CsDof63</i> | CAAT-box        | 1722           | 1727          | common cis-acting element in promoter and enhancer regions           |
| <i>CsDof63</i> | CAAT-box        | 1891           | 1896          | common cis-acting element in promoter and enhancer regions           |
| <i>CsDof63</i> | CAAT-box        | 1922           | 1927          | common cis-acting element in promoter and enhancer regions           |
| <i>CsDof63</i> | TATA-box        | 499            | 503           | core promoter element around -30 of transcription start              |
| <i>CsDof63</i> | TATA-box        | 697            | 702           | core promoter element around -30 of transcription start              |
| <i>CsDof63</i> | TATA-box        | 698            | 702           | core promoter element around -30 of transcription start              |
| <i>CsDof63</i> | TATA-box        | 756            | 763           | core promoter element around -30 of transcription start              |
| <i>CsDof63</i> | TATA-box        | 757            | 763           | core promoter element around -30 of transcription start              |
| <i>CsDof63</i> | TATA-box        | 758            | 763           | core promoter element around -30 of transcription start              |
| <i>CsDof63</i> | TATA-box        | 759            | 763           | core promoter element around -30 of transcription start              |
| <i>CsDof63</i> | TATA-box        | 775            | 779           | core promoter element around -30 of transcription start              |
| <i>CsDof63</i> | TATA-box        | 787            | 793           | core promoter element around -30 of transcription start              |
| <i>CsDof63</i> | TATA-box        | 788            | 794           | core promoter element around -30 of transcription start              |

| Name           | Cis-element | Start position | Stop position | Function                                                             |
|----------------|-------------|----------------|---------------|----------------------------------------------------------------------|
| <i>CsDof63</i> | TATA-box    | 789            | 793           | core promoter element around -30 of transcription start              |
| <i>CsDof63</i> | TATA-box    | 989            | 995           | core promoter element around -30 of transcription start              |
| <i>CsDof63</i> | TATA-box    | 990            | 994           | core promoter element around -30 of transcription start              |
| <i>CsDof63</i> | TATA-box    | 1092           | 1096          | core promoter element around -30 of transcription start              |
| <i>CsDof63</i> | TATA-box    | 1102           | 1107          | core promoter element around -30 of transcription start              |
| <i>CsDof63</i> | TATA-box    | 1103           | 1107          | core promoter element around -30 of transcription start              |
| <i>CsDof63</i> | TATA-box    | 1226           | 1230          | core promoter element around -30 of transcription start              |
| <i>CsDof63</i> | TATA-box    | 1293           | 1297          | core promoter element around -30 of transcription start              |
| <i>CsDof63</i> | TATA-box    | 1468           | 1474          | core promoter element around -30 of transcription start              |
| <i>CsDof63</i> | TATA-box    | 1469           | 1474          | core promoter element around -30 of transcription start              |
| <i>CsDof63</i> | TATA-box    | 1470           | 1474          | core promoter element around -30 of transcription start              |
| <i>CsDof63</i> | TATA-box    | 1524           | 1529          | core promoter element around -30 of transcription start              |
| <i>CsDof63</i> | TATA-box    | 1525           | 1529          | core promoter element around -30 of transcription start              |
| <i>CsDof63</i> | TATA-box    | 1543           | 1549          | core promoter element around -30 of transcription start              |
| <i>CsDof63</i> | TATA-box    | 1544           | 1548          | core promoter element around -30 of transcription start              |
| <i>CsDof63</i> | TATA-box    | 1558           | 1564          | core promoter element around -30 of transcription start              |
| <i>CsDof63</i> | TATA-box    | 1559           | 1564          | core promoter element around -30 of transcription start              |
| <i>CsDof63</i> | TATA-box    | 1560           | 1564          | core promoter element around -30 of transcription start              |
| <i>CsDof63</i> | TATA-box    | 1616           | 1620          | core promoter element around -30 of transcription start              |
| <i>CsDof63</i> | TATA-box    | 1686           | 1698          | core promoter element around -30 of transcription start              |
| <i>CsDof63</i> | TATA-box    | 1688           | 1694          | core promoter element around -30 of transcription start              |
| <i>CsDof63</i> | TATA-box    | 1689           | 1695          | core promoter element around -30 of transcription start              |
| <i>CsDof63</i> | TATA-box    | 1690           | 1696          | core promoter element around -30 of transcription start              |
| <i>CsDof63</i> | TATA-box    | 1691           | 1697          | core promoter element around -30 of transcription start              |
| <i>CsDof63</i> | TATA-box    | 1692           | 1698          | core promoter element around -30 of transcription start              |
| <i>CsDof63</i> | TATA-box    | 1693           | 1699          | core promoter element around -30 of transcription start              |
| <i>CsDof63</i> | TATA-box    | 1694           | 1700          | core promoter element around -30 of transcription start              |
| <i>CsDof63</i> | TATA-box    | 1695           | 1701          | core promoter element around -30 of transcription start              |
| <i>CsDof63</i> | TATA-box    | 1696           | 1702          | core promoter element around -30 of transcription start              |
| <i>CsDof63</i> | TATA-box    | 1697           | 1701          | core promoter element around -30 of transcription start              |
| <i>CsDof63</i> | TATA-box    | 1765           | 1771          | core promoter element around -30 of transcription start              |
| <i>CsDof63</i> | TATA-box    | 1766           | 1771          | core promoter element around -30 of transcription start              |
| <i>CsDof63</i> | TATA-box    | 1767           | 1771          | core promoter element around -30 of transcription start              |
| <i>CsDof63</i> | TATA-box    | 1774           | 1778          | core promoter element around -30 of transcription start              |
| <i>CsDof63</i> | GARE-motif  | 842            | 849           | gibberellin-responsive element                                       |
| <i>CsDof63</i> | GT1-motif   | 1253           | 1259          | light responsive element                                             |
| <i>CsDof63</i> | MBS         | 572            | 578           | MYB binding site involved in drought-inducibility                    |
| <i>CsDof63</i> | MBSI        | 1259           | 1269.5        | MYB binding site involved in flavonoid biosynthetic genes regulation |
| <i>CsDof63</i> | CCAAT-box   | 1067           | 1073          | MYBHv1 binding site                                                  |
| <i>CsDof63</i> | CCAAT-box   | 1657           | 1663          | MYBHv1 binding site                                                  |
| <i>CsDof64</i> | ABRE        | 316            | 321           | abscisic acid responsiveness                                         |
| <i>CsDof64</i> | ABRE        | 974            | 983           | abscisic acid responsiveness                                         |
| <i>CsDof64</i> | MSA-like    | 1250           | 1259          | cis-acting element involved in cell cycle regulation                 |
| <i>CsDof64</i> | MSA-like    | 1252           | 1261          | cis-acting element involved in cell cycle regulation                 |
| <i>CsDof64</i> | ARE         | 132            | 138           | cis-acting regulatory element essential for the anaerobic induction  |
| <i>CsDof64</i> | ARE         | 877            | 883           | cis-acting regulatory element essential for the anaerobic induction  |
| <i>CsDof64</i> | ARE         | 927            | 933           | cis-acting regulatory element essential for the anaerobic induction  |
| <i>CsDof64</i> | AuxRR-core  | 1378           | 1385          | cis-acting regulatory element involved in auxin responsiveness       |
| <i>CsDof64</i> | G-box       | 315            | 321           | cis-acting regulatory element involved in light responsiveness       |
| <i>CsDof64</i> | G-box       | 973            | 984           | cis-acting regulatory element involved in light responsiveness       |
| <i>CsDof64</i> | CGTCA-motif | 11             | 16            | cis-acting regulatory element involved in the MeJA-responsiveness    |

| Name           | Cis-element | Start position | Stop position | Function                                                             |
|----------------|-------------|----------------|---------------|----------------------------------------------------------------------|
| <i>CsDof64</i> | CGTCA-motif | 1177           | 1182          | cis-acting regulatory element involved in the MeJA-responsiveness    |
| <i>CsDof64</i> | CGTCA-motif | 1286           | 1291          | cis-acting regulatory element involved in the MeJA-responsiveness    |
| <i>CsDof64</i> | TGACG-motif | 11             | 16            | cis-acting regulatory element involved in the MeJA-responsiveness    |
| <i>CsDof64</i> | TGACG-motif | 1177           | 1182          | cis-acting regulatory element involved in the MeJA-responsiveness    |
| <i>CsDof64</i> | TGACG-motif | 1286           | 1291          | cis-acting regulatory element involved in the MeJA-responsiveness    |
| <i>CsDof64</i> | O2-site     | 1270           | 1279          | cis-acting regulatory element involved in zein metabolism regulation |
| <i>CsDof64</i> | CAAT-box    | 64             | 69            | common cis-acting element in promoter and enhancer regions           |
| <i>CsDof64</i> | CAAT-box    | 81             | 86            | common cis-acting element in promoter and enhancer regions           |
| <i>CsDof64</i> | CAAT-box    | 225            | 230           | common cis-acting element in promoter and enhancer regions           |
| <i>CsDof64</i> | CAAT-box    | 296            | 301           | common cis-acting element in promoter and enhancer regions           |
| <i>CsDof64</i> | CAAT-box    | 853            | 858           | common cis-acting element in promoter and enhancer regions           |
| <i>CsDof64</i> | CAAT-box    | 1260           | 1265          | common cis-acting element in promoter and enhancer regions           |
| <i>CsDof64</i> | CAAT-box    | 1393           | 1398          | common cis-acting element in promoter and enhancer regions           |
| <i>CsDof64</i> | CAAT-box    | 1487           | 1492          | common cis-acting element in promoter and enhancer regions           |
| <i>CsDof64</i> | CAAT-box    | 1904           | 1909          | common cis-acting element in promoter and enhancer regions           |
| <i>CsDof64</i> | TATA-box    | 48             | 54            | core promoter element around -30 of transcription start              |
| <i>CsDof64</i> | TATA-box    | 49             | 54            | core promoter element around -30 of transcription start              |
| <i>CsDof64</i> | TATA-box    | 50             | 54            | core promoter element around -30 of transcription start              |
| <i>CsDof64</i> | TATA-box    | 335            | 341           | core promoter element around -30 of transcription start              |
| <i>CsDof64</i> | TATA-box    | 336            | 342           | core promoter element around -30 of transcription start              |
| <i>CsDof64</i> | TATA-box    | 337            | 341           | core promoter element around -30 of transcription start              |
| <i>CsDof64</i> | TATA-box    | 503            | 509           | core promoter element around -30 of transcription start              |
| <i>CsDof64</i> | TATA-box    | 504            | 508           | core promoter element around -30 of transcription start              |
| <i>CsDof64</i> | TATA-box    | 508            | 514           | core promoter element around -30 of transcription start              |
| <i>CsDof64</i> | TATA-box    | 509            | 514           | core promoter element around -30 of transcription start              |
| <i>CsDof64</i> | TATA-box    | 510            | 514           | core promoter element around -30 of transcription start              |
| <i>CsDof64</i> | TATA-box    | 560            | 566           | core promoter element around -30 of transcription start              |
| <i>CsDof64</i> | TATA-box    | 561            | 565           | core promoter element around -30 of transcription start              |
| <i>CsDof64</i> | TATA-box    | 1383           | 1390          | core promoter element around -30 of transcription start              |
| <i>CsDof64</i> | TATA-box    | 1384           | 1390          | core promoter element around -30 of transcription start              |
| <i>CsDof64</i> | TATA-box    | 1385           | 1390          | core promoter element around -30 of transcription start              |
| <i>CsDof64</i> | TATA-box    | 1386           | 1390          | core promoter element around -30 of transcription start              |
| <i>CsDof64</i> | TATA-box    | 1601           | 1605          | core promoter element around -30 of transcription start              |
| <i>CsDof64</i> | TATA-box    | 1662           | 1668          | core promoter element around -30 of transcription start              |
| <i>CsDof64</i> | TATA-box    | 1663           | 1667          | core promoter element around -30 of transcription start              |
| <i>CsDof64</i> | TATA-box    | 1707           | 1713          | core promoter element around -30 of transcription start              |
| <i>CsDof64</i> | TATA-box    | 1708           | 1713          | core promoter element around -30 of transcription start              |
| <i>CsDof64</i> | TATA-box    | 1709           | 1713          | core promoter element around -30 of transcription start              |
| <i>CsDof64</i> | TATA-box    | 1718           | 1727          | core promoter element around -30 of transcription start              |
| <i>CsDof64</i> | TATA-box    | 1719           | 1726          | core promoter element around -30 of transcription start              |
| <i>CsDof64</i> | TATA-box    | 1720           | 1726          | core promoter element around -30 of transcription start              |
| <i>CsDof64</i> | TATA-box    | 1721           | 1728          | core promoter element around -30 of transcription start              |
| <i>CsDof64</i> | TATA-box    | 1722           | 1728          | core promoter element around -30 of transcription start              |
| <i>CsDof64</i> | TATA-box    | 1723           | 1729          | core promoter element around -30 of transcription start              |
| <i>CsDof64</i> | TATA-box    | 1724           | 1730          | core promoter element around -30 of transcription start              |
| <i>CsDof64</i> | TATA-box    | 1725           | 1731          | core promoter element around -30 of transcription start              |
| <i>CsDof64</i> | TATA-box    | 1726           | 1730          | core promoter element around -30 of transcription start              |
| <i>CsDof64</i> | TATA-box    | 1849           | 1856          | core promoter element around -30 of transcription start              |
| <i>CsDof64</i> | TATA-box    | 1850           | 1856          | core promoter element around -30 of transcription start              |
| <i>CsDof64</i> | TATA-box    | 1851           | 1856          | core promoter element around -30 of transcription start              |
| <i>CsDof64</i> | TATA-box    | 1852           | 1856          | core promoter element around -30 of transcription start              |

| Name           | Cis-element | Start position | Stop position | Function                                                             |
|----------------|-------------|----------------|---------------|----------------------------------------------------------------------|
| <i>CsDof64</i> | TATA-box    | 1864           | 1872          | core promoter element around -30 of transcription start              |
| <i>CsDof64</i> | HD-Zip 1    | 1780           | 1788.5        | element involved in differentiation of the palisade mesophyll cells  |
| <i>CsDof64</i> | GARE-motif  | 1168           | 1175          | gibberellin-responsive element                                       |
| <i>CsDof64</i> | GT1-motif   | 834            | 840           | light responsive element                                             |
| <i>CsDof64</i> | Sp1         | 542            | 548           | light responsive element                                             |
| <i>CsDof64</i> | MBS         | 537            | 543           | MYB binding site involved in drought-inducibility                    |
| <i>CsDof64</i> | MBS         | 599            | 605           | MYB binding site involved in drought-inducibility                    |
| <i>CsDof64</i> | MBS         | 710            | 716           | MYB binding site involved in drought-inducibility                    |
| <i>CsDof64</i> | MRE         | 163            | 170           | MYB binding site involved in light responsiveness                    |
| <i>CsDof64</i> | CCAAT-box   | 1253           | 1259          | MYBHv1 binding site                                                  |
| <i>CsDof64</i> | HD-Zip 3    | 150            | 159.5         | protein binding site                                                 |
| <i>CsDof65</i> | TGA-element | 1771           | 1777          | auxin-responsive element                                             |
| <i>CsDof65</i> | ARE         | 770            | 776           | cis-acting regulatory element essential for the anaerobic induction  |
| <i>CsDof65</i> | ARE         | 953            | 959           | cis-acting regulatory element essential for the anaerobic induction  |
| <i>CsDof65</i> | ARE         | 1483           | 1489          | cis-acting regulatory element essential for the anaerobic induction  |
| <i>CsDof65</i> | ARE         | 1666           | 1672          | cis-acting regulatory element essential for the anaerobic induction  |
| <i>CsDof65</i> | TGACG-motif | 31             | 36            | cis-acting regulatory element involved in the MeJA-responsiveness    |
| <i>CsDof65</i> | TGACG-motif | 1990           | 1995          | cis-acting regulatory element involved in the MeJA-responsiveness    |
| <i>CsDof65</i> | CGTCA-motif | 31             | 36            | cis-acting regulatory element involved in the MeJA-responsiveness    |
| <i>CsDof65</i> | CGTCA-motif | 1990           | 1995          | cis-acting regulatory element involved in the MeJA-responsiveness    |
| <i>CsDof65</i> | O2-site     | 914            | 923           | cis-acting regulatory element involved in zein metabolism regulation |
| <i>CsDof65</i> | O2-site     | 1627           | 1636          | cis-acting regulatory element involved in zein metabolism regulation |
| <i>CsDof65</i> | CAAT-box    | 5              | 10            | common cis-acting element in promoter and enhancer regions           |
| <i>CsDof65</i> | CAAT-box    | 19             | 24            | common cis-acting element in promoter and enhancer regions           |
| <i>CsDof65</i> | CAAT-box    | 224            | 229           | common cis-acting element in promoter and enhancer regions           |
| <i>CsDof65</i> | CAAT-box    | 591            | 596           | common cis-acting element in promoter and enhancer regions           |
| <i>CsDof65</i> | CAAT-box    | 616            | 621           | common cis-acting element in promoter and enhancer regions           |
| <i>CsDof65</i> | CAAT-box    | 708            | 713           | common cis-acting element in promoter and enhancer regions           |
| <i>CsDof65</i> | CAAT-box    | 715            | 720           | common cis-acting element in promoter and enhancer regions           |
| <i>CsDof65</i> | CAAT-box    | 1304           | 1309          | common cis-acting element in promoter and enhancer regions           |
| <i>CsDof65</i> | CAAT-box    | 1329           | 1334          | common cis-acting element in promoter and enhancer regions           |
| <i>CsDof65</i> | CAAT-box    | 1421           | 1426          | common cis-acting element in promoter and enhancer regions           |
| <i>CsDof65</i> | CAAT-box    | 1428           | 1433          | common cis-acting element in promoter and enhancer regions           |
| <i>CsDof65</i> | TATA-box    | 119            | 123           | core promoter element around -30 of transcription start              |
| <i>CsDof65</i> | TATA-box    | 134            | 139           | core promoter element around -30 of transcription start              |
| <i>CsDof65</i> | TATA-box    | 135            | 139           | core promoter element around -30 of transcription start              |
| <i>CsDof65</i> | TATA-box    | 234            | 241           | core promoter element around -30 of transcription start              |
| <i>CsDof65</i> | TATA-box    | 235            | 241           | core promoter element around -30 of transcription start              |
| <i>CsDof65</i> | TATA-box    | 236            | 241           | core promoter element around -30 of transcription start              |
| <i>CsDof65</i> | TATA-box    | 237            | 241           | core promoter element around -30 of transcription start              |
| <i>CsDof65</i> | TATA-box    | 247            | 253           | core promoter element around -30 of transcription start              |
| <i>CsDof65</i> | TATA-box    | 248            | 254           | core promoter element around -30 of transcription start              |
| <i>CsDof65</i> | TATA-box    | 249            | 255           | core promoter element around -30 of transcription start              |
| <i>CsDof65</i> | TATA-box    | 250            | 254           | core promoter element around -30 of transcription start              |
| <i>CsDof65</i> | TATA-box    | 300            | 306           | core promoter element around -30 of transcription start              |
| <i>CsDof65</i> | TATA-box    | 301            | 305           | core promoter element around -30 of transcription start              |
| <i>CsDof65</i> | TATA-box    | 570            | 577           | core promoter element around -30 of transcription start              |
| <i>CsDof65</i> | TATA-box    | 573            | 579           | core promoter element around -30 of transcription start              |
| <i>CsDof65</i> | TATA-box    | 575            | 579           | core promoter element around -30 of transcription start              |
| <i>CsDof65</i> | TATA-box    | 600            | 606           | core promoter element around -30 of transcription start              |
| <i>CsDof65</i> | TATA-box    | 601            | 607           | core promoter element around -30 of transcription start              |

| Name           | Cis-element      | Start position | Stop position | Function                                                             |
|----------------|------------------|----------------|---------------|----------------------------------------------------------------------|
| <i>CsDof65</i> | TATA-box         | 603            | 607           | core promoter element around -30 of transcription start              |
| <i>CsDof65</i> | TATA-box         | 644            | 648           | core promoter element around -30 of transcription start              |
| <i>CsDof65</i> | TATA-box         | 687            | 694           | core promoter element around -30 of transcription start              |
| <i>CsDof65</i> | TATA-box         | 688            | 694           | core promoter element around -30 of transcription start              |
| <i>CsDof65</i> | TATA-box         | 689            | 694           | core promoter element around -30 of transcription start              |
| <i>CsDof65</i> | TATA-box         | 690            | 694           | core promoter element around -30 of transcription start              |
| <i>CsDof65</i> | TATA-box         | 1013           | 1019          | core promoter element around -30 of transcription start              |
| <i>CsDof65</i> | TATA-box         | 1014           | 1018          | core promoter element around -30 of transcription start              |
| <i>CsDof65</i> | TATA-box         | 1283           | 1290          | core promoter element around -30 of transcription start              |
| <i>CsDof65</i> | TATA-box         | 1286           | 1292          | core promoter element around -30 of transcription start              |
| <i>CsDof65</i> | TATA-box         | 1288           | 1292          | core promoter element around -30 of transcription start              |
| <i>CsDof65</i> | TATA-box         | 1313           | 1319          | core promoter element around -30 of transcription start              |
| <i>CsDof65</i> | TATA-box         | 1314           | 1320          | core promoter element around -30 of transcription start              |
| <i>CsDof65</i> | TATA-box         | 1316           | 1320          | core promoter element around -30 of transcription start              |
| <i>CsDof65</i> | TATA-box         | 1357           | 1361          | core promoter element around -30 of transcription start              |
| <i>CsDof65</i> | TATA-box         | 1400           | 1407          | core promoter element around -30 of transcription start              |
| <i>CsDof65</i> | TATA-box         | 1401           | 1407          | core promoter element around -30 of transcription start              |
| <i>CsDof65</i> | TATA-box         | 1402           | 1407          | core promoter element around -30 of transcription start              |
| <i>CsDof65</i> | TATA-box         | 1403           | 1407          | core promoter element around -30 of transcription start              |
| <i>CsDof65</i> | TATA-box         | 1982           | 1988          | core promoter element around -30 of transcription start              |
| <i>CsDof65</i> | TATA-box         | 1983           | 1988          | core promoter element around -30 of transcription start              |
| <i>CsDof65</i> | TATA-box         | 1984           | 1988          | core promoter element around -30 of transcription start              |
| <i>CsDof65</i> | AT-rich sequence | 252            | 261           | element for maximal elicitor-mediated activation (2copies)           |
| <i>CsDof65</i> | HD-Zip 1         | 165            | 173.5         | element involved in differentiation of the palisade mesophyll cells  |
| <i>CsDof65</i> | MBS              | 741            | 747           | MYB binding site involved in drought-inducibility                    |
| <i>CsDof65</i> | MBS              | 1454           | 1460          | MYB binding site involved in drought-inducibility                    |
| <i>CsDof66</i> | ABRE             | 76             | 81            | abscisic acid responsiveness                                         |
| <i>CsDof66</i> | ABRE             | 1206           | 1211          | abscisic acid responsiveness                                         |
| <i>CsDof66</i> | ARE              | 319            | 325           | cis-acting regulatory element essential for the anaerobic induction  |
| <i>CsDof66</i> | ARE              | 1049           | 1055          | cis-acting regulatory element essential for the anaerobic induction  |
| <i>CsDof66</i> | G-Box            | 1205           | 1211          | cis-acting regulatory element involved in light responsiveness       |
| <i>CsDof66</i> | G-box            | 76             | 82            | cis-acting regulatory element involved in light responsiveness       |
| <i>CsDof66</i> | TGACG-motif      | 898            | 903           | cis-acting regulatory element involved in the MeJA-responsiveness    |
| <i>CsDof66</i> | CGTCA-motif      | 898            | 903           | cis-acting regulatory element involved in the MeJA-responsiveness    |
| <i>CsDof66</i> | O2-site          | 1985           | 1994          | cis-acting regulatory element involved in zein metabolism regulation |
| <i>CsDof66</i> | CAT-box          | 1335           | 1341          | cis-acting regulatory element related to meristem expression         |
| <i>CsDof66</i> | CAT-box          | 1493           | 1499          | cis-acting regulatory element related to meristem expression         |
| <i>CsDof66</i> | CAAT-box         | 47             | 52            | common cis-acting element in promoter and enhancer regions           |
| <i>CsDof66</i> | CAAT-box         | 126            | 131           | common cis-acting element in promoter and enhancer regions           |
| <i>CsDof66</i> | CAAT-box         | 132            | 137           | common cis-acting element in promoter and enhancer regions           |
| <i>CsDof66</i> | CAAT-box         | 646            | 651           | common cis-acting element in promoter and enhancer regions           |
| <i>CsDof66</i> | CAAT-box         | 666            | 671           | common cis-acting element in promoter and enhancer regions           |
| <i>CsDof66</i> | CAAT-box         | 703            | 708           | common cis-acting element in promoter and enhancer regions           |
| <i>CsDof66</i> | CAAT-box         | 816            | 821           | common cis-acting element in promoter and enhancer regions           |
| <i>CsDof66</i> | CAAT-box         | 823            | 828           | common cis-acting element in promoter and enhancer regions           |
| <i>CsDof66</i> | CAAT-box         | 868            | 873           | common cis-acting element in promoter and enhancer regions           |
| <i>CsDof66</i> | CAAT-box         | 903            | 908           | common cis-acting element in promoter and enhancer regions           |
| <i>CsDof66</i> | CAAT-box         | 1009           | 1014          | common cis-acting element in promoter and enhancer regions           |
| <i>CsDof66</i> | CAAT-box         | 1039           | 1044          | common cis-acting element in promoter and enhancer regions           |
| <i>CsDof66</i> | CAAT-box         | 1274           | 1279          | common cis-acting element in promoter and enhancer regions           |
| <i>CsDof66</i> | CAAT-box         | 1287           | 1292          | common cis-acting element in promoter and enhancer regions           |

| Name           | Cis-element | Start position | Stop position | Function                                                   |
|----------------|-------------|----------------|---------------|------------------------------------------------------------|
| <i>CsDof66</i> | CAAT-box    | 1580           | 1585          | common cis-acting element in promoter and enhancer regions |
| <i>CsDof66</i> | TATA-box    | 218            | 224           | core promoter element around -30 of transcription start    |
| <i>CsDof66</i> | TATA-box    | 219            | 225           | core promoter element around -30 of transcription start    |
| <i>CsDof66</i> | TATA-box    | 220            | 226           | core promoter element around -30 of transcription start    |
| <i>CsDof66</i> | TATA-box    | 221            | 225           | core promoter element around -30 of transcription start    |
| <i>CsDof66</i> | TATA-box    | 324            | 333           | core promoter element around -30 of transcription start    |
| <i>CsDof66</i> | TATA-box    | 325            | 332           | core promoter element around -30 of transcription start    |
| <i>CsDof66</i> | TATA-box    | 326            | 332           | core promoter element around -30 of transcription start    |
| <i>CsDof66</i> | TATA-box    | 327            | 334           | core promoter element around -30 of transcription start    |
| <i>CsDof66</i> | TATA-box    | 328            | 334           | core promoter element around -30 of transcription start    |
| <i>CsDof66</i> | TATA-box    | 330            | 334           | core promoter element around -30 of transcription start    |
| <i>CsDof66</i> | TATA-box    | 373            | 380           | core promoter element around -30 of transcription start    |
| <i>CsDof66</i> | TATA-box    | 422            | 430           | core promoter element around -30 of transcription start    |
| <i>CsDof66</i> | TATA-box    | 445            | 449           | core promoter element around -30 of transcription start    |
| <i>CsDof66</i> | TATA-box    | 572            | 578           | core promoter element around -30 of transcription start    |
| <i>CsDof66</i> | TATA-box    | 573            | 577           | core promoter element around -30 of transcription start    |
| <i>CsDof66</i> | TATA-box    | 618            | 625           | core promoter element around -30 of transcription start    |
| <i>CsDof66</i> | TATA-box    | 619            | 625           | core promoter element around -30 of transcription start    |
| <i>CsDof66</i> | TATA-box    | 620            | 627           | core promoter element around -30 of transcription start    |
| <i>CsDof66</i> | TATA-box    | 621            | 627           | core promoter element around -30 of transcription start    |
| <i>CsDof66</i> | TATA-box    | 622            | 628           | core promoter element around -30 of transcription start    |
| <i>CsDof66</i> | TATA-box    | 623            | 629           | core promoter element around -30 of transcription start    |
| <i>CsDof66</i> | TATA-box    | 624            | 630           | core promoter element around -30 of transcription start    |
| <i>CsDof66</i> | TATA-box    | 625            | 631           | core promoter element around -30 of transcription start    |
| <i>CsDof66</i> | TATA-box    | 626            | 632           | core promoter element around -30 of transcription start    |
| <i>CsDof66</i> | TATA-box    | 627            | 633           | core promoter element around -30 of transcription start    |
| <i>CsDof66</i> | TATA-box    | 629            | 633           | core promoter element around -30 of transcription start    |
| <i>CsDof66</i> | TATA-box    | 724            | 730           | core promoter element around -30 of transcription start    |
| <i>CsDof66</i> | TATA-box    | 725            | 731           | core promoter element around -30 of transcription start    |
| <i>CsDof66</i> | TATA-box    | 726            | 730           | core promoter element around -30 of transcription start    |
| <i>CsDof66</i> | TATA-box    | 885            | 891           | core promoter element around -30 of transcription start    |
| <i>CsDof66</i> | TATA-box    | 886            | 892           | core promoter element around -30 of transcription start    |
| <i>CsDof66</i> | TATA-box    | 887            | 893           | core promoter element around -30 of transcription start    |
| <i>CsDof66</i> | TATA-box    | 888            | 894           | core promoter element around -30 of transcription start    |
| <i>CsDof66</i> | TATA-box    | 889            | 895           | core promoter element around -30 of transcription start    |
| <i>CsDof66</i> | TATA-box    | 890            | 896           | core promoter element around -30 of transcription start    |
| <i>CsDof66</i> | TATA-box    | 891            | 895           | core promoter element around -30 of transcription start    |
| <i>CsDof66</i> | TATA-box    | 913            | 919           | core promoter element around -30 of transcription start    |
| <i>CsDof66</i> | TATA-box    | 914            | 918           | core promoter element around -30 of transcription start    |
| <i>CsDof66</i> | TATA-box    | 1020           | 1028          | core promoter element around -30 of transcription start    |
| <i>CsDof66</i> | TATA-box    | 1023           | 1030          | core promoter element around -30 of transcription start    |
| <i>CsDof66</i> | TATA-box    | 1024           | 1030          | core promoter element around -30 of transcription start    |
| <i>CsDof66</i> | TATA-box    | 1025           | 1031          | core promoter element around -30 of transcription start    |
| <i>CsDof66</i> | TATA-box    | 1026           | 1030          | core promoter element around -30 of transcription start    |
| <i>CsDof66</i> | TATA-box    | 1084           | 1090          | core promoter element around -30 of transcription start    |
| <i>CsDof66</i> | TATA-box    | 1085           | 1091          | core promoter element around -30 of transcription start    |
| <i>CsDof66</i> | TATA-box    | 1086           | 1090          | core promoter element around -30 of transcription start    |
| <i>CsDof66</i> | TATA-box    | 1129           | 1135          | core promoter element around -30 of transcription start    |
| <i>CsDof66</i> | TATA-box    | 1131           | 1137          | core promoter element around -30 of transcription start    |
| <i>CsDof66</i> | TATA-box    | 1132           | 1138          | core promoter element around -30 of transcription start    |
| <i>CsDof66</i> | TATA-box    | 1133           | 1137          | core promoter element around -30 of transcription start    |



| Name           | Cis-element | Start position | Stop position | Function                                                             |
|----------------|-------------|----------------|---------------|----------------------------------------------------------------------|
| <i>CsDof66</i> | TATA-box    | 1809           | 1815          | core promoter element around -30 of transcription start              |
| <i>CsDof66</i> | TATA-box    | 1810           | 1814          | core promoter element around -30 of transcription start              |
| <i>CsDof66</i> | TATA-box    | 1820           | 1829          | core promoter element around -30 of transcription start              |
| <i>CsDof66</i> | TATA-box    | 1821           | 1828          | core promoter element around -30 of transcription start              |
| <i>CsDof66</i> | TATA-box    | 1822           | 1828          | core promoter element around -30 of transcription start              |
| <i>CsDof66</i> | TATA-box    | 1823           | 1830          | core promoter element around -30 of transcription start              |
| <i>CsDof66</i> | TATA-box    | 1824           | 1830          | core promoter element around -30 of transcription start              |
| <i>CsDof66</i> | TATA-box    | 1825           | 1831          | core promoter element around -30 of transcription start              |
| <i>CsDof66</i> | TATA-box    | 1826           | 1832          | core promoter element around -30 of transcription start              |
| <i>CsDof66</i> | TATA-box    | 1827           | 1833          | core promoter element around -30 of transcription start              |
| <i>CsDof66</i> | TATA-box    | 1828           | 1832          | core promoter element around -30 of transcription start              |
| <i>CsDof66</i> | TATA-box    | 1838           | 1842          | core promoter element around -30 of transcription start              |
| <i>CsDof66</i> | GARE-motif  | 1567           | 1574          | gibberellin-responsive element                                       |
| <i>CsDof66</i> | MBS         | 295            | 301           | MYB binding site involved in drought-inducibility                    |
| <i>CsDof66</i> | MBS         | 1521           | 1527          | MYB binding site involved in drought-inducibility                    |
| <i>CsDof66</i> | MRE         | 224            | 231           | MYB binding site involved in light responsiveness                    |
| <i>CsDof67</i> | ABRE        | 1045           | 1050          | abscisic acid responsiveness                                         |
| <i>CsDof67</i> | ABRE        | 1422           | 1430          | abscisic acid responsiveness                                         |
| <i>CsDof67</i> | ABRE        | 1424           | 1429          | abscisic acid responsiveness                                         |
| <i>CsDof67</i> | ABRE        | 1651           | 1656          | abscisic acid responsiveness                                         |
| <i>CsDof67</i> | TATC-box    | 500            | 507           | cis-acting element involved in gibberellin-responsiveness            |
| <i>CsDof67</i> | A-box       | 573            | 579           | cis-acting regulatory element                                        |
| <i>CsDof67</i> | ARE         | 1472           | 1478          | cis-acting regulatory element essential for the anaerobic induction  |
| <i>CsDof67</i> | AuxRR-core  | 1186           | 1193          | cis-acting regulatory element involved in auxin responsiveness       |
| <i>CsDof67</i> | G-Box       | 1650           | 1656          | cis-acting regulatory element involved in light responsiveness       |
| <i>CsDof67</i> | G-box       | 1042           | 1051          | cis-acting regulatory element involved in light responsiveness       |
| <i>CsDof67</i> | G-box       | 1045           | 1051          | cis-acting regulatory element involved in light responsiveness       |
| <i>CsDof67</i> | G-box       | 1424           | 1430          | cis-acting regulatory element involved in light responsiveness       |
| <i>CsDof67</i> | CGTCA-motif | 331            | 336           | cis-acting regulatory element involved in the MeJA-responsiveness    |
| <i>CsDof67</i> | CGTCA-motif | 1400           | 1405          | cis-acting regulatory element involved in the MeJA-responsiveness    |
| <i>CsDof67</i> | TGACG-motif | 331            | 336           | cis-acting regulatory element involved in the MeJA-responsiveness    |
| <i>CsDof67</i> | TGACG-motif | 1400           | 1405          | cis-acting regulatory element involved in the MeJA-responsiveness    |
| <i>CsDof67</i> | O2-site     | 1476           | 1485          | cis-acting regulatory element involved in zein metabolism regulation |
| <i>CsDof67</i> | CAAT-box    | 26             | 31            | common cis-acting element in promoter and enhancer regions           |
| <i>CsDof67</i> | CAAT-box    | 54             | 59            | common cis-acting element in promoter and enhancer regions           |
| <i>CsDof67</i> | CAAT-box    | 410            | 415           | common cis-acting element in promoter and enhancer regions           |
| <i>CsDof67</i> | CAAT-box    | 427            | 432           | common cis-acting element in promoter and enhancer regions           |
| <i>CsDof67</i> | CAAT-box    | 536            | 541           | common cis-acting element in promoter and enhancer regions           |
| <i>CsDof67</i> | CAAT-box    | 637            | 642           | common cis-acting element in promoter and enhancer regions           |
| <i>CsDof67</i> | CAAT-box    | 673            | 682           | common cis-acting element in promoter and enhancer regions           |
| <i>CsDof67</i> | CAAT-box    | 675            | 680           | common cis-acting element in promoter and enhancer regions           |
| <i>CsDof67</i> | CAAT-box    | 816            | 821           | common cis-acting element in promoter and enhancer regions           |
| <i>CsDof67</i> | CAAT-box    | 853            | 858           | common cis-acting element in promoter and enhancer regions           |
| <i>CsDof67</i> | CAAT-box    | 1010           | 1015          | common cis-acting element in promoter and enhancer regions           |
| <i>CsDof67</i> | CAAT-box    | 1087           | 1092          | common cis-acting element in promoter and enhancer regions           |
| <i>CsDof67</i> | CAAT-box    | 1329           | 1334          | common cis-acting element in promoter and enhancer regions           |
| <i>CsDof67</i> | CAAT-box    | 1374           | 1379          | common cis-acting element in promoter and enhancer regions           |
| <i>CsDof67</i> | CAAT-box    | 1475           | 1480          | common cis-acting element in promoter and enhancer regions           |
| <i>CsDof67</i> | CAAT-box    | 1563           | 1568          | common cis-acting element in promoter and enhancer regions           |
| <i>CsDof67</i> | CAAT-box    | 1607           | 1612          | common cis-acting element in promoter and enhancer regions           |
| <i>CsDof67</i> | TATA-box    | 469            | 475           | core promoter element around -30 of transcription start              |



| Name           | Cis-element     | Start position | Stop position | Function                                                             |
|----------------|-----------------|----------------|---------------|----------------------------------------------------------------------|
| <i>CsDof67</i> | TATA-box        | 470            | 474           | core promoter element around -30 of transcription start              |
| <i>CsDof67</i> | TATA-box        | 1018           | 1025          | core promoter element around -30 of transcription start              |
| <i>CsDof67</i> | TATA-box        | 1019           | 1025          | core promoter element around -30 of transcription start              |
| <i>CsDof67</i> | TATA-box        | 1020           | 1025          | core promoter element around -30 of transcription start              |
| <i>CsDof67</i> | TATA-box        | 1021           | 1025          | core promoter element around -30 of transcription start              |
| <i>CsDof67</i> | TATA-box        | 1138           | 1142          | core promoter element around -30 of transcription start              |
| <i>CsDof67</i> | TATA-box        | 1192           | 1196          | core promoter element around -30 of transcription start              |
| <i>CsDof67</i> | TATA-box        | 1244           | 1250          | core promoter element around -30 of transcription start              |
| <i>CsDof67</i> | TATA-box        | 1245           | 1250          | core promoter element around -30 of transcription start              |
| <i>CsDof67</i> | TATA-box        | 1246           | 1250          | core promoter element around -30 of transcription start              |
| <i>CsDof67</i> | TATA-box        | 1285           | 1290          | core promoter element around -30 of transcription start              |
| <i>CsDof67</i> | TATA-box        | 1286           | 1290          | core promoter element around -30 of transcription start              |
| <i>CsDof67</i> | TATA-box        | 1314           | 1318          | core promoter element around -30 of transcription start              |
| <i>CsDof67</i> | TATA-box        | 1620           | 1628          | core promoter element around -30 of transcription start              |
| <i>CsDof67</i> | TATA-box        | 1632           | 1639          | core promoter element around -30 of transcription start              |
| <i>CsDof67</i> | TATA-box        | 1633           | 1639          | core promoter element around -30 of transcription start              |
| <i>CsDof67</i> | TATA-box        | 1634           | 1640          | core promoter element around -30 of transcription start              |
| <i>CsDof67</i> | TATA-box        | 1635           | 1639          | core promoter element around -30 of transcription start              |
| <i>CsDof67</i> | TATA-box        | 1750           | 1754          | core promoter element around -30 of transcription start              |
| <i>CsDof68</i> | ABRE            | 13             | 20            | abscisic acid responsiveness                                         |
| <i>CsDof68</i> | AT-rich element | 1956           | 1966          | binding site of AT-rich DNA binding protein (ATBP-1)                 |
| <i>CsDof68</i> | A-box           | 212            | 218           | cis-acting regulatory element                                        |
| <i>CsDof68</i> | ARE             | 765            | 771           | cis-acting regulatory element essential for the anaerobic induction  |
| <i>CsDof68</i> | TGACG-motif     | 1651           | 1656          | cis-acting regulatory element involved in the MeJA-responsiveness    |
| <i>CsDof68</i> | CGTCA-motif     | 1651           | 1656          | cis-acting regulatory element involved in the MeJA-responsiveness    |
| <i>CsDof68</i> | O2-site         | 438            | 447           | cis-acting regulatory element involved in zein metabolism regulation |
| <i>CsDof68</i> | CAT-box         | 314            | 320           | cis-acting regulatory element related to meristem expression         |
| <i>CsDof68</i> | CAAT-box        | 406            | 411           | common cis-acting element in promoter and enhancer regions           |
| <i>CsDof68</i> | CAAT-box        | 673            | 680           | common cis-acting element in promoter and enhancer regions           |
| <i>CsDof68</i> | CAAT-box        | 836            | 841           | common cis-acting element in promoter and enhancer regions           |
| <i>CsDof68</i> | CAAT-box        | 847            | 852           | common cis-acting element in promoter and enhancer regions           |
| <i>CsDof68</i> | CAAT-box        | 1083           | 1088          | common cis-acting element in promoter and enhancer regions           |
| <i>CsDof68</i> | CAAT-box        | 1204           | 1209          | common cis-acting element in promoter and enhancer regions           |
| <i>CsDof68</i> | CAAT-box        | 1397           | 1402          | common cis-acting element in promoter and enhancer regions           |
| <i>CsDof68</i> | CAAT-box        | 1442           | 1447          | common cis-acting element in promoter and enhancer regions           |
| <i>CsDof68</i> | CAAT-box        | 1463           | 1468          | common cis-acting element in promoter and enhancer regions           |
| <i>CsDof68</i> | CAAT-box        | 1634           | 1639          | common cis-acting element in promoter and enhancer regions           |
| <i>CsDof68</i> | CAAT-box        | 1764           | 1769          | common cis-acting element in promoter and enhancer regions           |
| <i>CsDof68</i> | CAAT-box        | 1972           | 1977          | common cis-acting element in promoter and enhancer regions           |
| <i>CsDof68</i> | TATA-box        | 218            | 222           | core promoter element around -30 of transcription start              |
| <i>CsDof68</i> | TATA-box        | 355            | 361           | core promoter element around -30 of transcription start              |
| <i>CsDof68</i> | TATA-box        | 356            | 362           | core promoter element around -30 of transcription start              |
| <i>CsDof68</i> | TATA-box        | 357            | 363           | core promoter element around -30 of transcription start              |
| <i>CsDof68</i> | TATA-box        | 358            | 364           | core promoter element around -30 of transcription start              |
| <i>CsDof68</i> | TATA-box        | 359            | 363           | core promoter element around -30 of transcription start              |
| <i>CsDof68</i> | TATA-box        | 379            | 383           | core promoter element around -30 of transcription start              |
| <i>CsDof68</i> | TATA-box        | 384            | 390           | core promoter element around -30 of transcription start              |
| <i>CsDof68</i> | TATA-box        | 385            | 389           | core promoter element around -30 of transcription start              |
| <i>CsDof68</i> | TATA-box        | 490            | 494           | core promoter element around -30 of transcription start              |
| <i>CsDof68</i> | TATA-box        | 699            | 706           | core promoter element around -30 of transcription start              |
| <i>CsDof68</i> | TATA-box        | 700            | 706           | core promoter element around -30 of transcription start              |



| Name           | Cis-element      | Start position | Stop position | Function                                                          |
|----------------|------------------|----------------|---------------|-------------------------------------------------------------------|
| <i>CsDof68</i> | TATA-box         | 1914           | 1921          | core promoter element around -30 of transcription start           |
| <i>CsDof68</i> | TATA-box         | 1915           | 1921          | core promoter element around -30 of transcription start           |
| <i>CsDof68</i> | TATA-box         | 1917           | 1921          | core promoter element around -30 of transcription start           |
| <i>CsDof68</i> | TATA-box         | 1934           | 1940          | core promoter element around -30 of transcription start           |
| <i>CsDof68</i> | TATA-box         | 1935           | 1941          | core promoter element around -30 of transcription start           |
| <i>CsDof68</i> | TATA-box         | 1936           | 1942          | core promoter element around -30 of transcription start           |
| <i>CsDof68</i> | TATA-box         | 1937           | 1943          | core promoter element around -30 of transcription start           |
| <i>CsDof68</i> | TATA-box         | 1939           | 1943          | core promoter element around -30 of transcription start           |
| <i>CsDof68</i> | AT-rich sequence | 412            | 421           | element for maximal elicitor-mediated activation (2copies)        |
| <i>CsDof68</i> | P-box            | 276            | 283           | gibberellin-responsive element                                    |
| <i>CsDof69</i> | ABRE             | 328            | 333           | abscisic acid responsiveness                                      |
| <i>CsDof69</i> | ABRE             | 587            | 594           | abscisic acid responsiveness                                      |
| <i>CsDof69</i> | TGA-element      | 428            | 434           | auxin-responsive element                                          |
| <i>CsDof69</i> | TGA-element      | 584            | 590           | auxin-responsive element                                          |
| <i>CsDof69</i> | TGA-element      | 1252           | 1258          | auxin-responsive element                                          |
| <i>CsDof69</i> | TCA-element      | 1911           | 1920          | cis-acting element involved in salicylic acid responsiveness      |
| <i>CsDof69</i> | G-box            | 327            | 333           | cis-acting regulatory element involved in light responsiveness    |
| <i>CsDof69</i> | CGTCA-motif      | 1375           | 1380          | cis-acting regulatory element involved in the MeJA-responsiveness |
| <i>CsDof69</i> | TGACG-motif      | 1375           | 1380          | cis-acting regulatory element involved in the MeJA-responsiveness |
| <i>CsDof69</i> | CAT-box          | 720            | 726           | cis-acting regulatory element related to meristem expression      |
| <i>CsDof69</i> | GCN4_motif       | 1223           | 1230          | cis-regulatory element involved in endosperm expression           |
| <i>CsDof69</i> | CAAT-box         | 127            | 132           | common cis-acting element in promoter and enhancer regions        |
| <i>CsDof69</i> | CAAT-box         | 211            | 216           | common cis-acting element in promoter and enhancer regions        |
| <i>CsDof69</i> | CAAT-box         | 260            | 265           | common cis-acting element in promoter and enhancer regions        |
| <i>CsDof69</i> | CAAT-box         | 510            | 515           | common cis-acting element in promoter and enhancer regions        |
| <i>CsDof69</i> | CAAT-box         | 779            | 784           | common cis-acting element in promoter and enhancer regions        |
| <i>CsDof69</i> | CAAT-box         | 805            | 810           | common cis-acting element in promoter and enhancer regions        |
| <i>CsDof69</i> | CAAT-box         | 810            | 815           | common cis-acting element in promoter and enhancer regions        |
| <i>CsDof69</i> | CAAT-box         | 898            | 903           | common cis-acting element in promoter and enhancer regions        |
| <i>CsDof69</i> | CAAT-box         | 945            | 950           | common cis-acting element in promoter and enhancer regions        |
| <i>CsDof69</i> | CAAT-box         | 948            | 953           | common cis-acting element in promoter and enhancer regions        |
| <i>CsDof69</i> | CAAT-box         | 1080           | 1085          | common cis-acting element in promoter and enhancer regions        |
| <i>CsDof69</i> | CAAT-box         | 1283           | 1288          | common cis-acting element in promoter and enhancer regions        |
| <i>CsDof69</i> | CAAT-box         | 1515           | 1520          | common cis-acting element in promoter and enhancer regions        |
| <i>CsDof69</i> | CAAT-box         | 1697           | 1702          | common cis-acting element in promoter and enhancer regions        |
| <i>CsDof69</i> | CAAT-box         | 1763           | 1768          | common cis-acting element in promoter and enhancer regions        |
| <i>CsDof69</i> | CAAT-box         | 1810           | 1815          | common cis-acting element in promoter and enhancer regions        |
| <i>CsDof69</i> | CAAT-box         | 1872           | 1877          | common cis-acting element in promoter and enhancer regions        |
| <i>CsDof69</i> | CAAT-box         | 1932           | 1937          | common cis-acting element in promoter and enhancer regions        |
| <i>CsDof69</i> | TATA-box         | 11             | 17            | core promoter element around -30 of transcription start           |
| <i>CsDof69</i> | TATA-box         | 13             | 17            | core promoter element around -30 of transcription start           |
| <i>CsDof69</i> | TATA-box         | 24             | 28            | core promoter element around -30 of transcription start           |
| <i>CsDof69</i> | TATA-box         | 55             | 60            | core promoter element around -30 of transcription start           |
| <i>CsDof69</i> | TATA-box         | 56             | 60            | core promoter element around -30 of transcription start           |
| <i>CsDof69</i> | TATA-box         | 81             | 87            | core promoter element around -30 of transcription start           |
| <i>CsDof69</i> | TATA-box         | 82             | 86            | core promoter element around -30 of transcription start           |
| <i>CsDof69</i> | TATA-box         | 105            | 109           | core promoter element around -30 of transcription start           |
| <i>CsDof69</i> | TATA-box         | 201            | 207           | core promoter element around -30 of transcription start           |
| <i>CsDof69</i> | TATA-box         | 202            | 207           | core promoter element around -30 of transcription start           |
| <i>CsDof69</i> | TATA-box         | 203            | 207           | core promoter element around -30 of transcription start           |
| <i>CsDof69</i> | TATA-box         | 311            | 317           | core promoter element around -30 of transcription start           |



| Name           | Cis-element | Start position | Stop position | Function                                                            |
|----------------|-------------|----------------|---------------|---------------------------------------------------------------------|
| <i>CsDof69</i> | GT1-motif   | 683            | 689           | light responsive element                                            |
| <i>CsDof69</i> | WUN-motif   | 816            | 825           | wound-responsive element                                            |
| <i>CsDof70</i> | ABRE        | 600            | 605           | abscisic acid responsiveness                                        |
| <i>CsDof70</i> | ABRE        | 1434           | 1440          | abscisic acid responsiveness                                        |
| <i>CsDof70</i> | ABRE        | 1435           | 1440          | abscisic acid responsiveness                                        |
| <i>CsDof70</i> | ABRE        | 1864           | 1874          | abscisic acid responsiveness                                        |
| <i>CsDof70</i> | ABRE        | 1866           | 1871          | abscisic acid responsiveness                                        |
| <i>CsDof70</i> | LTR         | 866            | 872           | cis-acting element involved in low-temperature responsiveness       |
| <i>CsDof70</i> | ARE         | 632            | 638           | cis-acting regulatory element essential for the anaerobic induction |
| <i>CsDof70</i> | ARE         | 724            | 730           | cis-acting regulatory element essential for the anaerobic induction |
| <i>CsDof70</i> | ARE         | 855            | 861           | cis-acting regulatory element essential for the anaerobic induction |
| <i>CsDof70</i> | G-Box       | 599            | 605           | cis-acting regulatory element involved in light responsiveness      |
| <i>CsDof70</i> | G-Box       | 1434           | 1440          | cis-acting regulatory element involved in light responsiveness      |
| <i>CsDof70</i> | G-Box       | 1866           | 1872          | cis-acting regulatory element involved in light responsiveness      |
| <i>CsDof70</i> | G-box       | 1433           | 1441          | cis-acting regulatory element involved in light responsiveness      |
| <i>CsDof70</i> | G-box       | 1434           | 1440          | cis-acting regulatory element involved in light responsiveness      |
| <i>CsDof70</i> | CGTCA-motif | 1212           | 1217          | cis-acting regulatory element involved in the MeJA-responsiveness   |
| <i>CsDof70</i> | TGACG-motif | 1212           | 1217          | cis-acting regulatory element involved in the MeJA-responsiveness   |
| <i>CsDof70</i> | CAT-box     | 1139           | 1145          | cis-acting regulatory element related to meristem expression        |
| <i>CsDof70</i> | CAAT-box    | 658            | 663           | common cis-acting element in promoter and enhancer regions          |
| <i>CsDof70</i> | CAAT-box    | 668            | 673           | common cis-acting element in promoter and enhancer regions          |
| <i>CsDof70</i> | CAAT-box    | 702            | 707           | common cis-acting element in promoter and enhancer regions          |
| <i>CsDof70</i> | CAAT-box    | 910            | 915           | common cis-acting element in promoter and enhancer regions          |
| <i>CsDof70</i> | CAAT-box    | 1197           | 1202          | common cis-acting element in promoter and enhancer regions          |
| <i>CsDof70</i> | CAAT-box    | 1294           | 1299          | common cis-acting element in promoter and enhancer regions          |
| <i>CsDof70</i> | CAAT-box    | 1351           | 1356          | common cis-acting element in promoter and enhancer regions          |
| <i>CsDof70</i> | CAAT-box    | 1399           | 1404          | common cis-acting element in promoter and enhancer regions          |
| <i>CsDof70</i> | CAAT-box    | 1458           | 1463          | common cis-acting element in promoter and enhancer regions          |
| <i>CsDof70</i> | CAAT-box    | 1655           | 1660          | common cis-acting element in promoter and enhancer regions          |
| <i>CsDof70</i> | CAAT-box    | 1660           | 1665          | common cis-acting element in promoter and enhancer regions          |
| <i>CsDof70</i> | CAAT-box    | 1944           | 1949          | common cis-acting element in promoter and enhancer regions          |
| <i>CsDof70</i> | TATA-box    | 691            | 695           | core promoter element around -30 of transcription start             |
| <i>CsDof70</i> | TATA-box    | 885            | 891           | core promoter element around -30 of transcription start             |
| <i>CsDof70</i> | TATA-box    | 886            | 890           | core promoter element around -30 of transcription start             |
| <i>CsDof70</i> | TATA-box    | 905            | 910           | core promoter element around -30 of transcription start             |
| <i>CsDof70</i> | TATA-box    | 906            | 910           | core promoter element around -30 of transcription start             |
| <i>CsDof70</i> | TATA-box    | 998            | 1002          | core promoter element around -30 of transcription start             |
| <i>CsDof70</i> | TATA-box    | 1016           | 1020          | core promoter element around -30 of transcription start             |
| <i>CsDof70</i> | TATA-box    | 1073           | 1077          | core promoter element around -30 of transcription start             |
| <i>CsDof70</i> | TATA-box    | 1192           | 1198          | core promoter element around -30 of transcription start             |
| <i>CsDof70</i> | TATA-box    | 1193           | 1198          | core promoter element around -30 of transcription start             |
| <i>CsDof70</i> | TATA-box    | 1194           | 1198          | core promoter element around -30 of transcription start             |
| <i>CsDof70</i> | TATA-box    | 1266           | 1270          | core promoter element around -30 of transcription start             |
| <i>CsDof70</i> | TATA-box    | 1314           | 1320          | core promoter element around -30 of transcription start             |
| <i>CsDof70</i> | TATA-box    | 1315           | 1321          | core promoter element around -30 of transcription start             |
| <i>CsDof70</i> | TATA-box    | 1316           | 1322          | core promoter element around -30 of transcription start             |
| <i>CsDof70</i> | TATA-box    | 1317           | 1321          | core promoter element around -30 of transcription start             |
| <i>CsDof70</i> | TATA-box    | 1337           | 1344          | core promoter element around -30 of transcription start             |
| <i>CsDof70</i> | TATA-box    | 1338           | 1344          | core promoter element around -30 of transcription start             |
| <i>CsDof70</i> | TATA-box    | 1339           | 1344          | core promoter element around -30 of transcription start             |
| <i>CsDof70</i> | TATA-box    | 1340           | 1344          | core promoter element around -30 of transcription start             |

| Name           | Cis-element     | Start position | Stop position | Function                                                            |
|----------------|-----------------|----------------|---------------|---------------------------------------------------------------------|
| <i>CsDof70</i> | TATA-box        | 1358           | 1366          | core promoter element around -30 of transcription start             |
| <i>CsDof70</i> | TATA-box        | 1440           | 1445          | core promoter element around -30 of transcription start             |
| <i>CsDof70</i> | TATA-box        | 1441           | 1445          | core promoter element around -30 of transcription start             |
| <i>CsDof70</i> | TATA-box        | 1452           | 1456          | core promoter element around -30 of transcription start             |
| <i>CsDof70</i> | TATA-box        | 1568           | 1577          | core promoter element around -30 of transcription start             |
| <i>CsDof70</i> | TATA-box        | 1570           | 1574          | core promoter element around -30 of transcription start             |
| <i>CsDof70</i> | TATA-box        | 1631           | 1636          | core promoter element around -30 of transcription start             |
| <i>CsDof70</i> | TATA-box        | 1632           | 1636          | core promoter element around -30 of transcription start             |
| <i>CsDof70</i> | TATA-box        | 1652           | 1656          | core promoter element around -30 of transcription start             |
| <i>CsDof70</i> | TATA-box        | 1694           | 1701          | core promoter element around -30 of transcription start             |
| <i>CsDof70</i> | TATA-box        | 1705           | 1711          | core promoter element around -30 of transcription start             |
| <i>CsDof70</i> | TATA-box        | 1706           | 1711          | core promoter element around -30 of transcription start             |
| <i>CsDof70</i> | TATA-box        | 1707           | 1711          | core promoter element around -30 of transcription start             |
| <i>CsDof70</i> | TATA-box        | 1726           | 1732          | core promoter element around -30 of transcription start             |
| <i>CsDof70</i> | TATA-box        | 1727           | 1732          | core promoter element around -30 of transcription start             |
| <i>CsDof70</i> | TATA-box        | 1728           | 1732          | core promoter element around -30 of transcription start             |
| <i>CsDof70</i> | TATA-box        | 1756           | 1760          | core promoter element around -30 of transcription start             |
| <i>CsDof70</i> | TATA-box        | 1783           | 1791          | core promoter element around -30 of transcription start             |
| <i>CsDof70</i> | TATA-box        | 1823           | 1829          | core promoter element around -30 of transcription start             |
| <i>CsDof70</i> | TATA-box        | 1825           | 1829          | core promoter element around -30 of transcription start             |
| <i>CsDof70</i> | TATA-box        | 1912           | 1920          | core promoter element around -30 of transcription start             |
| <i>CsDof70</i> | TATA-box        | 1915           | 1922          | core promoter element around -30 of transcription start             |
| <i>CsDof70</i> | TATA-box        | 1916           | 1922          | core promoter element around -30 of transcription start             |
| <i>CsDof70</i> | TATA-box        | 1917           | 1923          | core promoter element around -30 of transcription start             |
| <i>CsDof70</i> | TATA-box        | 1918           | 1922          | core promoter element around -30 of transcription start             |
| <i>CsDof70</i> | TATA-box        | 1969           | 1974          | core promoter element around -30 of transcription start             |
| <i>CsDof70</i> | TATA-box        | 1970           | 1974          | core promoter element around -30 of transcription start             |
| <i>CsDof70</i> | GARE-motif      | 550            | 557           | gibberellin-responsive element                                      |
| <i>CsDof70</i> | GT1-motif       | 589            | 595           | light responsive element                                            |
| <i>CsDof70</i> | CCAAT-box       | 1151           | 1157          | MYBHv1 binding site                                                 |
| <i>CsDof71</i> | ABRE            | 535            | 540           | abscisic acid responsiveness                                        |
| <i>CsDof71</i> | ABRE            | 726            | 731           | abscisic acid responsiveness                                        |
| <i>CsDof71</i> | ABRE            | 1061           | 1067          | abscisic acid responsiveness                                        |
| <i>CsDof71</i> | ABRE            | 1062           | 1067          | abscisic acid responsiveness                                        |
| <i>CsDof71</i> | ABRE            | 1421           | 1427          | abscisic acid responsiveness                                        |
| <i>CsDof71</i> | ABRE            | 1422           | 1427          | abscisic acid responsiveness                                        |
| <i>CsDof71</i> | ABRE            | 1853           | 1863          | abscisic acid responsiveness                                        |
| <i>CsDof71</i> | ABRE            | 1855           | 1860          | abscisic acid responsiveness                                        |
| <i>CsDof71</i> | TC-rich repeats | 912            | 921           | cis-acting element involved in defense and stress responsiveness    |
| <i>CsDof71</i> | TCA-element     | 86             | 95            | cis-acting element involved in salicylic acid responsiveness        |
| <i>CsDof71</i> | TCA-element     | 259            | 268           | cis-acting element involved in salicylic acid responsiveness        |
| <i>CsDof71</i> | ARE             | 425            | 431           | cis-acting regulatory element essential for the anaerobic induction |
| <i>CsDof71</i> | ARE             | 559            | 565           | cis-acting regulatory element essential for the anaerobic induction |
| <i>CsDof71</i> | ARE             | 880            | 886           | cis-acting regulatory element essential for the anaerobic induction |
| <i>CsDof71</i> | ARE             | 899            | 905           | cis-acting regulatory element essential for the anaerobic induction |
| <i>CsDof71</i> | circadian       | 246            | 255           | cis-acting regulatory element involved in circadian control         |
| <i>CsDof71</i> | G-Box           | 725            | 731           | cis-acting regulatory element involved in light responsiveness      |
| <i>CsDof71</i> | G-Box           | 1061           | 1067          | cis-acting regulatory element involved in light responsiveness      |
| <i>CsDof71</i> | G-Box           | 1421           | 1427          | cis-acting regulatory element involved in light responsiveness      |
| <i>CsDof71</i> | G-Box           | 1855           | 1861          | cis-acting regulatory element involved in light responsiveness      |
| <i>CsDof71</i> | G-box           | 534            | 540           | cis-acting regulatory element involved in light responsiveness      |

| Name           | Cis-element | Start position | Stop position | Function                                                             |
|----------------|-------------|----------------|---------------|----------------------------------------------------------------------|
| <i>CsDof71</i> | G-box       | 1061           | 1067          | cis-acting regulatory element involved in light responsiveness       |
| <i>CsDof71</i> | G-box       | 1420           | 1428          | cis-acting regulatory element involved in light responsiveness       |
| <i>CsDof71</i> | G-box       | 1421           | 1427          | cis-acting regulatory element involved in light responsiveness       |
| <i>CsDof71</i> | G-box       | 1852           | 1863          | cis-acting regulatory element involved in light responsiveness       |
| <i>CsDof71</i> | CGTCA-motif | 171            | 176           | cis-acting regulatory element involved in the MeJA-responsiveness    |
| <i>CsDof71</i> | CGTCA-motif | 1202           | 1207          | cis-acting regulatory element involved in the MeJA-responsiveness    |
| <i>CsDof71</i> | TGACG-motif | 171            | 176           | cis-acting regulatory element involved in the MeJA-responsiveness    |
| <i>CsDof71</i> | TGACG-motif | 1202           | 1207          | cis-acting regulatory element involved in the MeJA-responsiveness    |
| <i>CsDof71</i> | O2-site     | 540            | 549           | cis-acting regulatory element involved in zein metabolism regulation |
| <i>CsDof71</i> | CAT-box     | 1118           | 1124          | cis-acting regulatory element related to meristem expression         |
| <i>CsDof71</i> | CAT-box     | 1136           | 1142          | cis-acting regulatory element related to meristem expression         |
| <i>CsDof71</i> | CAAT-box    | 158            | 163           | common cis-acting element in promoter and enhancer regions           |
| <i>CsDof71</i> | CAAT-box    | 294            | 299           | common cis-acting element in promoter and enhancer regions           |
| <i>CsDof71</i> | CAAT-box    | 399            | 404           | common cis-acting element in promoter and enhancer regions           |
| <i>CsDof71</i> | CAAT-box    | 456            | 461           | common cis-acting element in promoter and enhancer regions           |
| <i>CsDof71</i> | CAAT-box    | 468            | 473           | common cis-acting element in promoter and enhancer regions           |
| <i>CsDof71</i> | CAAT-box    | 616            | 621           | common cis-acting element in promoter and enhancer regions           |
| <i>CsDof71</i> | CAAT-box    | 751            | 756           | common cis-acting element in promoter and enhancer regions           |
| <i>CsDof71</i> | CAAT-box    | 761            | 766           | common cis-acting element in promoter and enhancer regions           |
| <i>CsDof71</i> | CAAT-box    | 795            | 800           | common cis-acting element in promoter and enhancer regions           |
| <i>CsDof71</i> | CAAT-box    | 954            | 959           | common cis-acting element in promoter and enhancer regions           |
| <i>CsDof71</i> | CAAT-box    | 1113           | 1118          | common cis-acting element in promoter and enhancer regions           |
| <i>CsDof71</i> | CAAT-box    | 1284           | 1289          | common cis-acting element in promoter and enhancer regions           |
| <i>CsDof71</i> | CAAT-box    | 1338           | 1343          | common cis-acting element in promoter and enhancer regions           |
| <i>CsDof71</i> | CAAT-box    | 1386           | 1391          | common cis-acting element in promoter and enhancer regions           |
| <i>CsDof71</i> | CAAT-box    | 1445           | 1450          | common cis-acting element in promoter and enhancer regions           |
| <i>CsDof71</i> | CAAT-box    | 1649           | 1654          | common cis-acting element in promoter and enhancer regions           |
| <i>CsDof71</i> | TATA-box    | 70             | 74            | core promoter element around -30 of transcription start              |
| <i>CsDof71</i> | TATA-box    | 120            | 126           | core promoter element around -30 of transcription start              |
| <i>CsDof71</i> | TATA-box    | 121            | 127           | core promoter element around -30 of transcription start              |
| <i>CsDof71</i> | TATA-box    | 122            | 126           | core promoter element around -30 of transcription start              |
| <i>CsDof71</i> | TATA-box    | 211            | 215           | core promoter element around -30 of transcription start              |
| <i>CsDof71</i> | TATA-box    | 588            | 594           | core promoter element around -30 of transcription start              |
| <i>CsDof71</i> | TATA-box    | 590            | 594           | core promoter element around -30 of transcription start              |
| <i>CsDof71</i> | TATA-box    | 742            | 747           | core promoter element around -30 of transcription start              |
| <i>CsDof71</i> | TATA-box    | 743            | 747           | core promoter element around -30 of transcription start              |
| <i>CsDof71</i> | TATA-box    | 780            | 789           | core promoter element around -30 of transcription start              |
| <i>CsDof71</i> | TATA-box    | 781            | 788           | core promoter element around -30 of transcription start              |
| <i>CsDof71</i> | TATA-box    | 782            | 788           | core promoter element around -30 of transcription start              |
| <i>CsDof71</i> | TATA-box    | 783            | 788           | core promoter element around -30 of transcription start              |
| <i>CsDof71</i> | TATA-box    | 784            | 788           | core promoter element around -30 of transcription start              |
| <i>CsDof71</i> | TATA-box    | 926            | 934           | core promoter element around -30 of transcription start              |
| <i>CsDof71</i> | TATA-box    | 949            | 954           | core promoter element around -30 of transcription start              |
| <i>CsDof71</i> | TATA-box    | 950            | 954           | core promoter element around -30 of transcription start              |
| <i>CsDof71</i> | TATA-box    | 1189           | 1195          | core promoter element around -30 of transcription start              |
| <i>CsDof71</i> | TATA-box    | 1190           | 1195          | core promoter element around -30 of transcription start              |
| <i>CsDof71</i> | TATA-box    | 1191           | 1195          | core promoter element around -30 of transcription start              |
| <i>CsDof71</i> | TATA-box    | 1256           | 1260          | core promoter element around -30 of transcription start              |
| <i>CsDof71</i> | TATA-box    | 1304           | 1310          | core promoter element around -30 of transcription start              |
| <i>CsDof71</i> | TATA-box    | 1305           | 1311          | core promoter element around -30 of transcription start              |
| <i>CsDof71</i> | TATA-box    | 1306           | 1312          | core promoter element around -30 of transcription start              |

| Name           | Cis-element | Start position | Stop position | Function                                                             |
|----------------|-------------|----------------|---------------|----------------------------------------------------------------------|
| <i>CsDof71</i> | TATA-box    | 1307           | 1311          | core promoter element around -30 of transcription start              |
| <i>CsDof71</i> | TATA-box    | 1327           | 1334          | core promoter element around -30 of transcription start              |
| <i>CsDof71</i> | TATA-box    | 1328           | 1334          | core promoter element around -30 of transcription start              |
| <i>CsDof71</i> | TATA-box    | 1329           | 1334          | core promoter element around -30 of transcription start              |
| <i>CsDof71</i> | TATA-box    | 1330           | 1334          | core promoter element around -30 of transcription start              |
| <i>CsDof71</i> | TATA-box    | 1345           | 1353          | core promoter element around -30 of transcription start              |
| <i>CsDof71</i> | TATA-box    | 1427           | 1432          | core promoter element around -30 of transcription start              |
| <i>CsDof71</i> | TATA-box    | 1428           | 1432          | core promoter element around -30 of transcription start              |
| <i>CsDof71</i> | TATA-box    | 1439           | 1443          | core promoter element around -30 of transcription start              |
| <i>CsDof71</i> | TATA-box    | 1620           | 1625          | core promoter element around -30 of transcription start              |
| <i>CsDof71</i> | TATA-box    | 1621           | 1625          | core promoter element around -30 of transcription start              |
| <i>CsDof71</i> | TATA-box    | 1683           | 1690          | core promoter element around -30 of transcription start              |
| <i>CsDof71</i> | TATA-box    | 1686           | 1692          | core promoter element around -30 of transcription start              |
| <i>CsDof71</i> | TATA-box    | 1688           | 1692          | core promoter element around -30 of transcription start              |
| <i>CsDof71</i> | TATA-box    | 1694           | 1700          | core promoter element around -30 of transcription start              |
| <i>CsDof71</i> | TATA-box    | 1695           | 1700          | core promoter element around -30 of transcription start              |
| <i>CsDof71</i> | TATA-box    | 1696           | 1700          | core promoter element around -30 of transcription start              |
| <i>CsDof71</i> | TATA-box    | 1715           | 1721          | core promoter element around -30 of transcription start              |
| <i>CsDof71</i> | TATA-box    | 1716           | 1721          | core promoter element around -30 of transcription start              |
| <i>CsDof71</i> | TATA-box    | 1717           | 1721          | core promoter element around -30 of transcription start              |
| <i>CsDof71</i> | TATA-box    | 1812           | 1818          | core promoter element around -30 of transcription start              |
| <i>CsDof71</i> | TATA-box    | 1814           | 1818          | core promoter element around -30 of transcription start              |
| <i>CsDof71</i> | TATA-box    | 1841           | 1848          | core promoter element around -30 of transcription start              |
| <i>CsDof71</i> | TATA-box    | 1903           | 1911          | core promoter element around -30 of transcription start              |
| <i>CsDof71</i> | TATA-box    | 1906           | 1913          | core promoter element around -30 of transcription start              |
| <i>CsDof71</i> | TATA-box    | 1907           | 1913          | core promoter element around -30 of transcription start              |
| <i>CsDof71</i> | TATA-box    | 1908           | 1914          | core promoter element around -30 of transcription start              |
| <i>CsDof71</i> | TATA-box    | 1909           | 1913          | core promoter element around -30 of transcription start              |
| <i>CsDof71</i> | TATA-box    | 1960           | 1965          | core promoter element around -30 of transcription start              |
| <i>CsDof71</i> | TATA-box    | 1961           | 1965          | core promoter element around -30 of transcription start              |
| <i>CsDof71</i> | GARE-motif  | 676            | 683           | gibberellin-responsive element                                       |
| <i>CsDof71</i> | GT1-motif   | 715            | 721           | light responsive element                                             |
| <i>CsDof71</i> | GT1-motif   | 1104           | 1110          | light responsive element                                             |
| <i>CsDof71</i> | MBS         | 1129           | 1135          | MYB binding site involved in drought-inducibility                    |
| <i>CsDof71</i> | MBSI        | 907            | 918           | MYB binding site involved in flavonoid biosynthetic genes regulation |
| <i>CsDof71</i> | CCAAT-box   | 1148           | 1154          | MYBHv1 binding site                                                  |
| <i>CsDof72</i> | ABRE        | 701            | 706           | abscisic acid responsiveness                                         |
| <i>CsDof72</i> | ABRE        | 990            | 997           | abscisic acid responsiveness                                         |
| <i>CsDof72</i> | ABRE        | 1413           | 1418          | abscisic acid responsiveness                                         |
| <i>CsDof72</i> | ABRE        | 1852           | 1861          | abscisic acid responsiveness                                         |
| <i>CsDof72</i> | ABRE        | 1854           | 1859          | abscisic acid responsiveness                                         |
| <i>CsDof72</i> | LTR         | 959            | 965           | cis-acting element involved in low-temperature responsiveness        |
| <i>CsDof72</i> | ARE         | 467            | 473           | cis-acting regulatory element essential for the anaerobic induction  |
| <i>CsDof72</i> | ARE         | 749            | 755           | cis-acting regulatory element essential for the anaerobic induction  |
| <i>CsDof72</i> | ARE         | 804            | 810           | cis-acting regulatory element essential for the anaerobic induction  |
| <i>CsDof72</i> | ARE         | 870            | 876           | cis-acting regulatory element essential for the anaerobic induction  |
| <i>CsDof72</i> | ARE         | 925            | 931           | cis-acting regulatory element essential for the anaerobic induction  |
| <i>CsDof72</i> | G-box       | 700            | 706           | cis-acting regulatory element involved in light responsiveness       |
| <i>CsDof72</i> | G-box       | 1413           | 1419          | cis-acting regulatory element involved in light responsiveness       |
| <i>CsDof72</i> | G-Box       | 1854           | 1860          | cis-acting regulatory element involved in light responsiveness       |
| <i>CsDof72</i> | TGACG-motif | 902            | 907           | cis-acting regulatory element involved in the MeJA-responsiveness    |



| Name           | Cis-element | Start position | Stop position | Function                                                             |
|----------------|-------------|----------------|---------------|----------------------------------------------------------------------|
| <i>CsDof72</i> | CGTCA-motif | 902            | 907           | cis-acting regulatory element involved in the MeJA-responsiveness    |
| <i>CsDof72</i> | O2-site     | 598            | 607           | cis-acting regulatory element involved in zein metabolism regulation |
| <i>CsDof72</i> | CAT-box     | 1024           | 1030          | cis-acting regulatory element related to meristem expression         |
| <i>CsDof72</i> | CAAT-box    | 95             | 100           | common cis-acting element in promoter and enhancer regions           |
| <i>CsDof72</i> | CAAT-box    | 137            | 142           | common cis-acting element in promoter and enhancer regions           |
| <i>CsDof72</i> | CAAT-box    | 376            | 381           | common cis-acting element in promoter and enhancer regions           |
| <i>CsDof72</i> | CAAT-box    | 494            | 499           | common cis-acting element in promoter and enhancer regions           |
| <i>CsDof72</i> | CAAT-box    | 689            | 694           | common cis-acting element in promoter and enhancer regions           |
| <i>CsDof72</i> | CAAT-box    | 873            | 878           | common cis-acting element in promoter and enhancer regions           |
| <i>CsDof72</i> | CAAT-box    | 1049           | 1054          | common cis-acting element in promoter and enhancer regions           |
| <i>CsDof72</i> | CAAT-box    | 1278           | 1283          | common cis-acting element in promoter and enhancer regions           |
| <i>CsDof72</i> | CAAT-box    | 1333           | 1338          | common cis-acting element in promoter and enhancer regions           |
| <i>CsDof72</i> | CAAT-box    | 1380           | 1385          | common cis-acting element in promoter and enhancer regions           |
| <i>CsDof72</i> | CAAT-box    | 1648           | 1653          | common cis-acting element in promoter and enhancer regions           |
| <i>CsDof72</i> | TATA-box    | 14             | 20            | core promoter element around -30 of transcription start              |
| <i>CsDof72</i> | TATA-box    | 15             | 19            | core promoter element around -30 of transcription start              |
| <i>CsDof72</i> | TATA-box    | 52             | 58            | core promoter element around -30 of transcription start              |
| <i>CsDof72</i> | TATA-box    | 53             | 57            | core promoter element around -30 of transcription start              |
| <i>CsDof72</i> | TATA-box    | 84             | 90            | core promoter element around -30 of transcription start              |
| <i>CsDof72</i> | TATA-box    | 85             | 90            | core promoter element around -30 of transcription start              |
| <i>CsDof72</i> | TATA-box    | 86             | 90            | core promoter element around -30 of transcription start              |
| <i>CsDof72</i> | TATA-box    | 100            | 104           | core promoter element around -30 of transcription start              |
| <i>CsDof72</i> | TATA-box    | 269            | 277           | core promoter element around -30 of transcription start              |
| <i>CsDof72</i> | TATA-box    | 483            | 487           | core promoter element around -30 of transcription start              |
| <i>CsDof72</i> | TATA-box    | 542            | 549           | core promoter element around -30 of transcription start              |
| <i>CsDof72</i> | TATA-box    | 611            | 617           | core promoter element around -30 of transcription start              |
| <i>CsDof72</i> | TATA-box    | 612            | 617           | core promoter element around -30 of transcription start              |
| <i>CsDof72</i> | TATA-box    | 613            | 617           | core promoter element around -30 of transcription start              |
| <i>CsDof72</i> | TATA-box    | 881            | 885           | core promoter element around -30 of transcription start              |
| <i>CsDof72</i> | TATA-box    | 916            | 920           | core promoter element around -30 of transcription start              |
| <i>CsDof72</i> | TATA-box    | 1177           | 1181          | core promoter element around -30 of transcription start              |
| <i>CsDof72</i> | TATA-box    | 1188           | 1197          | core promoter element around -30 of transcription start              |
| <i>CsDof72</i> | TATA-box    | 1191           | 1196          | core promoter element around -30 of transcription start              |
| <i>CsDof72</i> | TATA-box    | 1192           | 1196          | core promoter element around -30 of transcription start              |
| <i>CsDof72</i> | TATA-box    | 1250           | 1254          | core promoter element around -30 of transcription start              |
| <i>CsDof72</i> | TATA-box    | 1298           | 1304          | core promoter element around -30 of transcription start              |
| <i>CsDof72</i> | TATA-box    | 1299           | 1305          | core promoter element around -30 of transcription start              |
| <i>CsDof72</i> | TATA-box    | 1300           | 1306          | core promoter element around -30 of transcription start              |
| <i>CsDof72</i> | TATA-box    | 1301           | 1305          | core promoter element around -30 of transcription start              |
| <i>CsDof72</i> | TATA-box    | 1322           | 1329          | core promoter element around -30 of transcription start              |
| <i>CsDof72</i> | TATA-box    | 1323           | 1329          | core promoter element around -30 of transcription start              |
| <i>CsDof72</i> | TATA-box    | 1324           | 1329          | core promoter element around -30 of transcription start              |
| <i>CsDof72</i> | TATA-box    | 1325           | 1329          | core promoter element around -30 of transcription start              |
| <i>CsDof72</i> | TATA-box    | 1418           | 1424          | core promoter element around -30 of transcription start              |
| <i>CsDof72</i> | TATA-box    | 1419           | 1424          | core promoter element around -30 of transcription start              |
| <i>CsDof72</i> | TATA-box    | 1420           | 1424          | core promoter element around -30 of transcription start              |
| <i>CsDof72</i> | TATA-box    | 1429           | 1438          | core promoter element around -30 of transcription start              |
| <i>CsDof72</i> | TATA-box    | 1431           | 1435          | core promoter element around -30 of transcription start              |
| <i>CsDof72</i> | TATA-box    | 1547           | 1553          | core promoter element around -30 of transcription start              |
| <i>CsDof72</i> | TATA-box    | 1548           | 1553          | core promoter element around -30 of transcription start              |
| <i>CsDof72</i> | TATA-box    | 1549           | 1553          | core promoter element around -30 of transcription start              |

| Name           | Cis-element | Start position | Stop position | Function                                                             |
|----------------|-------------|----------------|---------------|----------------------------------------------------------------------|
| <i>CsDof72</i> | TATA-box    | 1619           | 1624          | core promoter element around -30 of transcription start              |
| <i>CsDof72</i> | TATA-box    | 1620           | 1624          | core promoter element around -30 of transcription start              |
| <i>CsDof72</i> | TATA-box    | 1682           | 1689          | core promoter element around -30 of transcription start              |
| <i>CsDof72</i> | TATA-box    | 1685           | 1691          | core promoter element around -30 of transcription start              |
| <i>CsDof72</i> | TATA-box    | 1687           | 1691          | core promoter element around -30 of transcription start              |
| <i>CsDof72</i> | TATA-box    | 1693           | 1699          | core promoter element around -30 of transcription start              |
| <i>CsDof72</i> | TATA-box    | 1694           | 1699          | core promoter element around -30 of transcription start              |
| <i>CsDof72</i> | TATA-box    | 1695           | 1699          | core promoter element around -30 of transcription start              |
| <i>CsDof72</i> | TATA-box    | 1714           | 1720          | core promoter element around -30 of transcription start              |
| <i>CsDof72</i> | TATA-box    | 1715           | 1720          | core promoter element around -30 of transcription start              |
| <i>CsDof72</i> | TATA-box    | 1716           | 1720          | core promoter element around -30 of transcription start              |
| <i>CsDof72</i> | TATA-box    | 1744           | 1748          | core promoter element around -30 of transcription start              |
| <i>CsDof72</i> | TATA-box    | 1758           | 1763          | core promoter element around -30 of transcription start              |
| <i>CsDof72</i> | TATA-box    | 1759           | 1763          | core promoter element around -30 of transcription start              |
| <i>CsDof72</i> | TATA-box    | 1811           | 1817          | core promoter element around -30 of transcription start              |
| <i>CsDof72</i> | TATA-box    | 1813           | 1817          | core promoter element around -30 of transcription start              |
| <i>CsDof72</i> | TATA-box    | 1902           | 1910          | core promoter element around -30 of transcription start              |
| <i>CsDof72</i> | TATA-box    | 1905           | 1912          | core promoter element around -30 of transcription start              |
| <i>CsDof72</i> | TATA-box    | 1906           | 1912          | core promoter element around -30 of transcription start              |
| <i>CsDof72</i> | TATA-box    | 1907           | 1913          | core promoter element around -30 of transcription start              |
| <i>CsDof72</i> | TATA-box    | 1908           | 1912          | core promoter element around -30 of transcription start              |
| <i>CsDof72</i> | TATA-box    | 1959           | 1964          | core promoter element around -30 of transcription start              |
| <i>CsDof72</i> | TATA-box    | 1960           | 1964          | core promoter element around -30 of transcription start              |
| <i>CsDof72</i> | GARE-motif  | 153            | 160           | gibberellin-responsive element                                       |
| <i>CsDof72</i> | GT1-motif   | 643            | 649           | light responsive element                                             |
| <i>CsDof72</i> | MBS         | 344            | 350           | MYB binding site involved in drought-inducibility                    |
| <i>CsDof72</i> | MBS         | 575            | 581           | MYB binding site involved in drought-inducibility                    |
| <i>CsDof72</i> | Box III     | 110            | 121           | protein binding site                                                 |
| <i>CsDof73</i> | ABRE        | 1534           | 1540          | abscisic acid responsiveness                                         |
| <i>CsDof73</i> | ABRE        | 1535           | 1540          | abscisic acid responsiveness                                         |
| <i>CsDof73</i> | ABRE        | 1803           | 1808          | abscisic acid responsiveness                                         |
| <i>CsDof73</i> | LTR         | 1836           | 1842          | cis-acting element involved in low-temperature responsiveness        |
| <i>CsDof73</i> | ARE         | 1294           | 1300          | cis-acting regulatory element essential for the anaerobic induction  |
| <i>CsDof73</i> | ARE         | 1305           | 1311          | cis-acting regulatory element essential for the anaerobic induction  |
| <i>CsDof73</i> | ARE         | 1565           | 1571          | cis-acting regulatory element essential for the anaerobic induction  |
| <i>CsDof73</i> | ARE         | 1584           | 1590          | cis-acting regulatory element essential for the anaerobic induction  |
| <i>CsDof73</i> | circadian   | 478            | 487           | cis-acting regulatory element involved in circadian control          |
| <i>CsDof73</i> | G-box       | 1533           | 1541          | cis-acting regulatory element involved in light responsiveness       |
| <i>CsDof73</i> | G-box       | 1534           | 1540          | cis-acting regulatory element involved in light responsiveness       |
| <i>CsDof73</i> | G-Box       | 1534           | 1540          | cis-acting regulatory element involved in light responsiveness       |
| <i>CsDof73</i> | G-Box       | 1803           | 1809          | cis-acting regulatory element involved in light responsiveness       |
| <i>CsDof73</i> | O2-site     | 346            | 355           | cis-acting regulatory element involved in zein metabolism regulation |
| <i>CsDof73</i> | CAAT-box    | 732            | 737           | common cis-acting element in promoter and enhancer regions           |
| <i>CsDof73</i> | CAAT-box    | 779            | 784           | common cis-acting element in promoter and enhancer regions           |
| <i>CsDof73</i> | CAAT-box    | 825            | 830           | common cis-acting element in promoter and enhancer regions           |
| <i>CsDof73</i> | CAAT-box    | 1046           | 1051          | common cis-acting element in promoter and enhancer regions           |
| <i>CsDof73</i> | CAAT-box    | 1227           | 1232          | common cis-acting element in promoter and enhancer regions           |
| <i>CsDof73</i> | CAAT-box    | 1270           | 1275          | common cis-acting element in promoter and enhancer regions           |
| <i>CsDof73</i> | CAAT-box    | 1288           | 1293          | common cis-acting element in promoter and enhancer regions           |
| <i>CsDof73</i> | CAAT-box    | 1644           | 1649          | common cis-acting element in promoter and enhancer regions           |
| <i>CsDof73</i> | CAAT-box    | 1650           | 1655          | common cis-acting element in promoter and enhancer regions           |

| Name           | Cis-element | Start position | Stop position | Function                                                   |
|----------------|-------------|----------------|---------------|------------------------------------------------------------|
| <i>CsDof73</i> | CAAT-box    | 1982           | 1987          | common cis-acting element in promoter and enhancer regions |
| <i>CsDof73</i> | TATA-box    | 99             | 106           | core promoter element around -30 of transcription start    |
| <i>CsDof73</i> | TATA-box    | 587            | 593           | core promoter element around -30 of transcription start    |
| <i>CsDof73</i> | TATA-box    | 588            | 594           | core promoter element around -30 of transcription start    |
| <i>CsDof73</i> | TATA-box    | 589            | 593           | core promoter element around -30 of transcription start    |
| <i>CsDof73</i> | TATA-box    | 614            | 618           | core promoter element around -30 of transcription start    |
| <i>CsDof73</i> | TATA-box    | 637            | 643           | core promoter element around -30 of transcription start    |
| <i>CsDof73</i> | TATA-box    | 638            | 643           | core promoter element around -30 of transcription start    |
| <i>CsDof73</i> | TATA-box    | 639            | 643           | core promoter element around -30 of transcription start    |
| <i>CsDof73</i> | TATA-box    | 698            | 704           | core promoter element around -30 of transcription start    |
| <i>CsDof73</i> | TATA-box    | 699            | 705           | core promoter element around -30 of transcription start    |
| <i>CsDof73</i> | TATA-box    | 700            | 704           | core promoter element around -30 of transcription start    |
| <i>CsDof73</i> | TATA-box    | 920            | 926           | core promoter element around -30 of transcription start    |
| <i>CsDof73</i> | TATA-box    | 921            | 927           | core promoter element around -30 of transcription start    |
| <i>CsDof73</i> | TATA-box    | 922            | 926           | core promoter element around -30 of transcription start    |
| <i>CsDof73</i> | TATA-box    | 961            | 967           | core promoter element around -30 of transcription start    |
| <i>CsDof73</i> | TATA-box    | 962            | 968           | core promoter element around -30 of transcription start    |
| <i>CsDof73</i> | TATA-box    | 963            | 967           | core promoter element around -30 of transcription start    |
| <i>CsDof73</i> | TATA-box    | 1143           | 1150          | core promoter element around -30 of transcription start    |
| <i>CsDof73</i> | TATA-box    | 1144           | 1150          | core promoter element around -30 of transcription start    |
| <i>CsDof73</i> | TATA-box    | 1145           | 1150          | core promoter element around -30 of transcription start    |
| <i>CsDof73</i> | TATA-box    | 1146           | 1150          | core promoter element around -30 of transcription start    |
| <i>CsDof73</i> | TATA-box    | 1240           | 1247          | core promoter element around -30 of transcription start    |
| <i>CsDof73</i> | TATA-box    | 1241           | 1250          | core promoter element around -30 of transcription start    |
| <i>CsDof73</i> | TATA-box    | 1242           | 1247          | core promoter element around -30 of transcription start    |
| <i>CsDof73</i> | TATA-box    | 1243           | 1247          | core promoter element around -30 of transcription start    |
| <i>CsDof73</i> | TATA-box    | 1251           | 1260          | core promoter element around -30 of transcription start    |
| <i>CsDof73</i> | TATA-box    | 1252           | 1259          | core promoter element around -30 of transcription start    |
| <i>CsDof73</i> | TATA-box    | 1253           | 1259          | core promoter element around -30 of transcription start    |
| <i>CsDof73</i> | TATA-box    | 1254           | 1259          | core promoter element around -30 of transcription start    |
| <i>CsDof73</i> | TATA-box    | 1255           | 1259          | core promoter element around -30 of transcription start    |
| <i>CsDof73</i> | TATA-box    | 1264           | 1271          | core promoter element around -30 of transcription start    |
| <i>CsDof73</i> | TATA-box    | 1322           | 1329          | core promoter element around -30 of transcription start    |
| <i>CsDof73</i> | TATA-box    | 1356           | 1360          | core promoter element around -30 of transcription start    |
| <i>CsDof73</i> | TATA-box    | 1475           | 1481          | core promoter element around -30 of transcription start    |
| <i>CsDof73</i> | TATA-box    | 1476           | 1480          | core promoter element around -30 of transcription start    |
| <i>CsDof73</i> | TATA-box    | 1498           | 1504          | core promoter element around -30 of transcription start    |
| <i>CsDof73</i> | TATA-box    | 1499           | 1505          | core promoter element around -30 of transcription start    |
| <i>CsDof73</i> | TATA-box    | 1501           | 1505          | core promoter element around -30 of transcription start    |
| <i>CsDof73</i> | TATA-box    | 1593           | 1598          | core promoter element around -30 of transcription start    |
| <i>CsDof73</i> | TATA-box    | 1594           | 1598          | core promoter element around -30 of transcription start    |
| <i>CsDof73</i> | TATA-box    | 1660           | 1664          | core promoter element around -30 of transcription start    |
| <i>CsDof73</i> | TATA-box    | 1689           | 1693          | core promoter element around -30 of transcription start    |
| <i>CsDof73</i> | TATA-box    | 1789           | 1796          | core promoter element around -30 of transcription start    |
| <i>CsDof73</i> | TATA-box    | 1876           | 1882          | core promoter element around -30 of transcription start    |
| <i>CsDof73</i> | TATA-box    | 1877           | 1883          | core promoter element around -30 of transcription start    |
| <i>CsDof73</i> | TATA-box    | 1878           | 1882          | core promoter element around -30 of transcription start    |
| <i>CsDof73</i> | TATA-box    | 1942           | 1947          | core promoter element around -30 of transcription start    |
| <i>CsDof73</i> | TATA-box    | 1943           | 1947          | core promoter element around -30 of transcription start    |
| <i>CsDof73</i> | MBS         | 1309           | 1315          | MYB binding site involved in drought-inducibility          |
| <i>CsDof74</i> | ABRE        | 1415           | 1420          | abscisic acid responsiveness                               |

| Name           | Cis-element           | Start position | Stop position | Function                                                            |
|----------------|-----------------------|----------------|---------------|---------------------------------------------------------------------|
| <i>CsDof74</i> | ABRE                  | 1852           | 1862          | abscisic acid responsiveness                                        |
| <i>CsDof74</i> | ABRE                  | 1854           | 1859          | abscisic acid responsiveness                                        |
| <i>CsDof74</i> | TC-rich repeats       | 1117           | 1126          | cis-acting element involved in defense and stress responsiveness    |
| <i>CsDof74</i> | TC-rich repeats       | 1557           | 1566          | cis-acting element involved in defense and stress responsiveness    |
| <i>CsDof74</i> | TCA-element           | 266            | 275           | cis-acting element involved in salicylic acid responsiveness        |
| <i>CsDof74</i> | Box II -like sequence | 160            | 170           | cis-acting regulatory element                                       |
| <i>CsDof74</i> | ARE                   | 1930           | 1936          | cis-acting regulatory element essential for the anaerobic induction |
| <i>CsDof74</i> | G-Box                 | 1854           | 1860          | cis-acting regulatory element involved in light responsiveness      |
| <i>CsDof74</i> | G-box                 | 1415           | 1421          | cis-acting regulatory element involved in light responsiveness      |
| <i>CsDof74</i> | CGTCA-motif           | 731            | 736           | cis-acting regulatory element involved in the MeJA-responsiveness   |
| <i>CsDof74</i> | TGACG-motif           | 731            | 736           | cis-acting regulatory element involved in the MeJA-responsiveness   |
| <i>CsDof74</i> | CAAT-box              | 42             | 47            | common cis-acting element in promoter and enhancer regions          |
| <i>CsDof74</i> | CAAT-box              | 48             | 53            | common cis-acting element in promoter and enhancer regions          |
| <i>CsDof74</i> | CAAT-box              | 75             | 80            | common cis-acting element in promoter and enhancer regions          |
| <i>CsDof74</i> | CAAT-box              | 207            | 212           | common cis-acting element in promoter and enhancer regions          |
| <i>CsDof74</i> | CAAT-box              | 322            | 327           | common cis-acting element in promoter and enhancer regions          |
| <i>CsDof74</i> | CAAT-box              | 412            | 417           | common cis-acting element in promoter and enhancer regions          |
| <i>CsDof74</i> | CAAT-box              | 421            | 426           | common cis-acting element in promoter and enhancer regions          |
| <i>CsDof74</i> | CAAT-box              | 429            | 434           | common cis-acting element in promoter and enhancer regions          |
| <i>CsDof74</i> | CAAT-box              | 548            | 553           | common cis-acting element in promoter and enhancer regions          |
| <i>CsDof74</i> | CAAT-box              | 668            | 673           | common cis-acting element in promoter and enhancer regions          |
| <i>CsDof74</i> | CAAT-box              | 735            | 740           | common cis-acting element in promoter and enhancer regions          |
| <i>CsDof74</i> | CAAT-box              | 866            | 871           | common cis-acting element in promoter and enhancer regions          |
| <i>CsDof74</i> | CAAT-box              | 896            | 901           | common cis-acting element in promoter and enhancer regions          |
| <i>CsDof74</i> | CAAT-box              | 999            | 1004          | common cis-acting element in promoter and enhancer regions          |
| <i>CsDof74</i> | CAAT-box              | 1071           | 1076          | common cis-acting element in promoter and enhancer regions          |
| <i>CsDof74</i> | CAAT-box              | 1334           | 1339          | common cis-acting element in promoter and enhancer regions          |
| <i>CsDof74</i> | CAAT-box              | 1382           | 1387          | common cis-acting element in promoter and enhancer regions          |
| <i>CsDof74</i> | CAAT-box              | 1648           | 1653          | common cis-acting element in promoter and enhancer regions          |
| <i>CsDof74</i> | TATA-box              | 109            | 113           | core promoter element around -30 of transcription start             |
| <i>CsDof74</i> | TATA-box              | 257            | 263           | core promoter element around -30 of transcription start             |
| <i>CsDof74</i> | TATA-box              | 258            | 262           | core promoter element around -30 of transcription start             |
| <i>CsDof74</i> | TATA-box              | 701            | 707           | core promoter element around -30 of transcription start             |
| <i>CsDof74</i> | TATA-box              | 702            | 707           | core promoter element around -30 of transcription start             |
| <i>CsDof74</i> | TATA-box              | 703            | 707           | core promoter element around -30 of transcription start             |
| <i>CsDof74</i> | TATA-box              | 757            | 763           | core promoter element around -30 of transcription start             |
| <i>CsDof74</i> | TATA-box              | 758            | 764           | core promoter element around -30 of transcription start             |
| <i>CsDof74</i> | TATA-box              | 759            | 763           | core promoter element around -30 of transcription start             |
| <i>CsDof74</i> | TATA-box              | 877            | 881           | core promoter element around -30 of transcription start             |
| <i>CsDof74</i> | TATA-box              | 916            | 924           | core promoter element around -30 of transcription start             |
| <i>CsDof74</i> | TATA-box              | 919            | 926           | core promoter element around -30 of transcription start             |
| <i>CsDof74</i> | TATA-box              | 920            | 926           | core promoter element around -30 of transcription start             |
| <i>CsDof74</i> | TATA-box              | 921            | 927           | core promoter element around -30 of transcription start             |
| <i>CsDof74</i> | TATA-box              | 922            | 926           | core promoter element around -30 of transcription start             |
| <i>CsDof74</i> | TATA-box              | 1052           | 1059          | core promoter element around -30 of transcription start             |
| <i>CsDof74</i> | TATA-box              | 1053           | 1059          | core promoter element around -30 of transcription start             |
| <i>CsDof74</i> | TATA-box              | 1054           | 1060          | core promoter element around -30 of transcription start             |
| <i>CsDof74</i> | TATA-box              | 1055           | 1059          | core promoter element around -30 of transcription start             |
| <i>CsDof74</i> | TATA-box              | 1074           | 1080          | core promoter element around -30 of transcription start             |
| <i>CsDof74</i> | TATA-box              | 1075           | 1079          | core promoter element around -30 of transcription start             |
| <i>CsDof74</i> | TATA-box              | 1097           | 1103          | core promoter element around -30 of transcription start             |



| Name           | Cis-element     | Start position | Stop position | Function                                                            |
|----------------|-----------------|----------------|---------------|---------------------------------------------------------------------|
| <i>CsDof74</i> | TATA-box        | 1959           | 1965          | core promoter element around -30 of transcription start             |
| <i>CsDof74</i> | TATA-box        | 1960           | 1965          | core promoter element around -30 of transcription start             |
| <i>CsDof74</i> | TATA-box        | 1961           | 1965          | core promoter element around -30 of transcription start             |
| <i>CsDof74</i> | P-box           | 282            | 289           | gibberellin-responsive element                                      |
| <i>CsDof74</i> | GARE-motif      | 232            | 239           | gibberellin-responsive element                                      |
| <i>CsDof74</i> | GT1-motif       | 1211           | 1217          | light responsive element                                            |
| <i>CsDof74</i> | MBS             | 34             | 40            | MYB binding site involved in drought-inducibility                   |
| <i>CsDof75</i> | ABRE            | 1689           | 1695          | abscisic acid responsiveness                                        |
| <i>CsDof75</i> | ABRE            | 1690           | 1695          | abscisic acid responsiveness                                        |
| <i>CsDof75</i> | ABRE            | 1700           | 1705          | abscisic acid responsiveness                                        |
| <i>CsDof75</i> | TC-rich repeats | 1042           | 1051          | cis-acting element involved in defense and stress responsiveness    |
| <i>CsDof75</i> | TC-rich repeats | 1081           | 1090          | cis-acting element involved in defense and stress responsiveness    |
| <i>CsDof75</i> | ARE             | 532            | 538           | cis-acting regulatory element essential for the anaerobic induction |
| <i>CsDof75</i> | G-Box           | 1689           | 1695          | cis-acting regulatory element involved in light responsiveness      |
| <i>CsDof75</i> | G-box           | 1075           | 1084          | cis-acting regulatory element involved in light responsiveness      |
| <i>CsDof75</i> | G-box           | 1689           | 1695          | cis-acting regulatory element involved in light responsiveness      |
| <i>CsDof75</i> | G-box           | 1699           | 1705          | cis-acting regulatory element involved in light responsiveness      |
| <i>CsDof75</i> | CGTCA-motif     | 1034           | 1039          | cis-acting regulatory element involved in the MeJA-responsiveness   |
| <i>CsDof75</i> | CGTCA-motif     | 1698           | 1703          | cis-acting regulatory element involved in the MeJA-responsiveness   |
| <i>CsDof75</i> | TGACG-motif     | 1034           | 1039          | cis-acting regulatory element involved in the MeJA-responsiveness   |
| <i>CsDof75</i> | TGACG-motif     | 1698           | 1703          | cis-acting regulatory element involved in the MeJA-responsiveness   |
| <i>CsDof75</i> | CAAT-box        | 14             | 19            | common cis-acting element in promoter and enhancer regions          |
| <i>CsDof75</i> | CAAT-box        | 379            | 384           | common cis-acting element in promoter and enhancer regions          |
| <i>CsDof75</i> | CAAT-box        | 401            | 408           | common cis-acting element in promoter and enhancer regions          |
| <i>CsDof75</i> | CAAT-box        | 556            | 563           | common cis-acting element in promoter and enhancer regions          |
| <i>CsDof75</i> | CAAT-box        | 684            | 689           | common cis-acting element in promoter and enhancer regions          |
| <i>CsDof75</i> | CAAT-box        | 998            | 1003          | common cis-acting element in promoter and enhancer regions          |
| <i>CsDof75</i> | CAAT-box        | 1332           | 1337          | common cis-acting element in promoter and enhancer regions          |
| <i>CsDof75</i> | CAAT-box        | 1389           | 1394          | common cis-acting element in promoter and enhancer regions          |
| <i>CsDof75</i> | CAAT-box        | 1808           | 1813          | common cis-acting element in promoter and enhancer regions          |
| <i>CsDof75</i> | CAAT-box        | 1816           | 1821          | common cis-acting element in promoter and enhancer regions          |
| <i>CsDof75</i> | CAAT-box        | 1894           | 1899          | common cis-acting element in promoter and enhancer regions          |
| <i>CsDof75</i> | TATA-box        | 9              | 15            | core promoter element around -30 of transcription start             |
| <i>CsDof75</i> | TATA-box        | 10             | 16            | core promoter element around -30 of transcription start             |
| <i>CsDof75</i> | TATA-box        | 11             | 15            | core promoter element around -30 of transcription start             |
| <i>CsDof75</i> | TATA-box        | 19             | 24            | core promoter element around -30 of transcription start             |
| <i>CsDof75</i> | TATA-box        | 20             | 24            | core promoter element around -30 of transcription start             |
| <i>CsDof75</i> | TATA-box        | 60             | 66            | core promoter element around -30 of transcription start             |
| <i>CsDof75</i> | TATA-box        | 62             | 66            | core promoter element around -30 of transcription start             |
| <i>CsDof75</i> | TATA-box        | 77             | 82            | core promoter element around -30 of transcription start             |
| <i>CsDof75</i> | TATA-box        | 78             | 82            | core promoter element around -30 of transcription start             |
| <i>CsDof75</i> | TATA-box        | 88             | 95            | core promoter element around -30 of transcription start             |
| <i>CsDof75</i> | TATA-box        | 96             | 102           | core promoter element around -30 of transcription start             |
| <i>CsDof75</i> | TATA-box        | 97             | 102           | core promoter element around -30 of transcription start             |
| <i>CsDof75</i> | TATA-box        | 98             | 102           | core promoter element around -30 of transcription start             |
| <i>CsDof75</i> | TATA-box        | 361            | 369           | core promoter element around -30 of transcription start             |
| <i>CsDof75</i> | TATA-box        | 362            | 369           | core promoter element around -30 of transcription start             |
| <i>CsDof75</i> | TATA-box        | 363            | 369           | core promoter element around -30 of transcription start             |
| <i>CsDof75</i> | TATA-box        | 364            | 369           | core promoter element around -30 of transcription start             |
| <i>CsDof75</i> | TATA-box        | 365            | 369           | core promoter element around -30 of transcription start             |
| <i>CsDof75</i> | TATA-box        | 479            | 485           | core promoter element around -30 of transcription start             |



| Name           | Cis-element | Start position | Stop position | Function                                                             |
|----------------|-------------|----------------|---------------|----------------------------------------------------------------------|
| <i>CsDof75</i> | TATA-box    | 1270           | 1274          | core promoter element around -30 of transcription start              |
| <i>CsDof75</i> | TATA-box    | 1305           | 1311          | core promoter element around -30 of transcription start              |
| <i>CsDof75</i> | TATA-box    | 1306           | 1310          | core promoter element around -30 of transcription start              |
| <i>CsDof75</i> | TATA-box    | 1341           | 1347          | core promoter element around -30 of transcription start              |
| <i>CsDof75</i> | TATA-box    | 1342           | 1348          | core promoter element around -30 of transcription start              |
| <i>CsDof75</i> | TATA-box    | 1343           | 1349          | core promoter element around -30 of transcription start              |
| <i>CsDof75</i> | TATA-box    | 1344           | 1348          | core promoter element around -30 of transcription start              |
| <i>CsDof75</i> | TATA-box    | 1358           | 1362          | core promoter element around -30 of transcription start              |
| <i>CsDof75</i> | TATA-box    | 1410           | 1418          | core promoter element around -30 of transcription start              |
| <i>CsDof75</i> | TATA-box    | 1415           | 1421          | core promoter element around -30 of transcription start              |
| <i>CsDof75</i> | TATA-box    | 1416           | 1422          | core promoter element around -30 of transcription start              |
| <i>CsDof75</i> | TATA-box    | 1417           | 1423          | core promoter element around -30 of transcription start              |
| <i>CsDof75</i> | TATA-box    | 1418           | 1422          | core promoter element around -30 of transcription start              |
| <i>CsDof75</i> | TATA-box    | 1480           | 1485          | core promoter element around -30 of transcription start              |
| <i>CsDof75</i> | TATA-box    | 1481           | 1485          | core promoter element around -30 of transcription start              |
| <i>CsDof75</i> | TATA-box    | 1502           | 1509          | core promoter element around -30 of transcription start              |
| <i>CsDof75</i> | TATA-box    | 1664           | 1671          | core promoter element around -30 of transcription start              |
| <i>CsDof75</i> | P-box       | 1720           | 1727          | gibberellin-responsive element                                       |
| <i>CsDof75</i> | GT1-motif   | 899            | 905           | light responsive element                                             |
| <i>CsDof76</i> | ABRE        | 1094           | 1099          | abscisic acid responsiveness                                         |
| <i>CsDof76</i> | LTR         | 395            | 401           | cis-acting element involved in low-temperature responsiveness        |
| <i>CsDof76</i> | ARE         | 147            | 153           | cis-acting regulatory element essential for the anaerobic induction  |
| <i>CsDof76</i> | ARE         | 297            | 303           | cis-acting regulatory element essential for the anaerobic induction  |
| <i>CsDof76</i> | ARE         | 1945           | 1951          | cis-acting regulatory element essential for the anaerobic induction  |
| <i>CsDof76</i> | G-box       | 1094           | 1100          | cis-acting regulatory element involved in light responsiveness       |
| <i>CsDof76</i> | TGACG-motif | 842            | 847           | cis-acting regulatory element involved in the MeJA-responsiveness    |
| <i>CsDof76</i> | TGACG-motif | 897            | 902           | cis-acting regulatory element involved in the MeJA-responsiveness    |
| <i>CsDof76</i> | CGTCA-motif | 842            | 847           | cis-acting regulatory element involved in the MeJA-responsiveness    |
| <i>CsDof76</i> | CGTCA-motif | 897            | 902           | cis-acting regulatory element involved in the MeJA-responsiveness    |
| <i>CsDof76</i> | O2-site     | 983            | 992           | cis-acting regulatory element involved in zein metabolism regulation |
| <i>CsDof76</i> | CAT-box     | 1136           | 1142          | cis-acting regulatory element related to meristem expression         |
| <i>CsDof76</i> | CAAT-box    | 121            | 126           | common cis-acting element in promoter and enhancer regions           |
| <i>CsDof76</i> | CAAT-box    | 183            | 188           | common cis-acting element in promoter and enhancer regions           |
| <i>CsDof76</i> | CAAT-box    | 199            | 204           | common cis-acting element in promoter and enhancer regions           |
| <i>CsDof76</i> | CAAT-box    | 214            | 219           | common cis-acting element in promoter and enhancer regions           |
| <i>CsDof76</i> | CAAT-box    | 229            | 234           | common cis-acting element in promoter and enhancer regions           |
| <i>CsDof76</i> | CAAT-box    | 437            | 442           | common cis-acting element in promoter and enhancer regions           |
| <i>CsDof76</i> | CAAT-box    | 473            | 478           | common cis-acting element in promoter and enhancer regions           |
| <i>CsDof76</i> | CAAT-box    | 1351           | 1356          | common cis-acting element in promoter and enhancer regions           |
| <i>CsDof76</i> | CAAT-box    | 1661           | 1666          | common cis-acting element in promoter and enhancer regions           |
| <i>CsDof76</i> | CAAT-box    | 1664           | 1669          | common cis-acting element in promoter and enhancer regions           |
| <i>CsDof76</i> | CAAT-box    | 1720           | 1725          | common cis-acting element in promoter and enhancer regions           |
| <i>CsDof76</i> | CAAT-box    | 1930           | 1935          | common cis-acting element in promoter and enhancer regions           |
| <i>CsDof76</i> | CAAT-box    | 1996           | 2001          | common cis-acting element in promoter and enhancer regions           |
| <i>CsDof76</i> | TATA-box    | 126            | 130           | core promoter element around -30 of transcription start              |
| <i>CsDof76</i> | TATA-box    | 131            | 138           | core promoter element around -30 of transcription start              |
| <i>CsDof76</i> | TATA-box    | 137            | 143           | core promoter element around -30 of transcription start              |
| <i>CsDof76</i> | TATA-box    | 138            | 143           | core promoter element around -30 of transcription start              |
| <i>CsDof76</i> | TATA-box    | 139            | 143           | core promoter element around -30 of transcription start              |
| <i>CsDof76</i> | TATA-box    | 224            | 233           | core promoter element around -30 of transcription start              |
| <i>CsDof76</i> | TATA-box    | 412            | 422           | core promoter element around -30 of transcription start              |





| <b>Name</b>    | <b>Cis-element</b> | <b>Start position</b> | <b>Stop position</b> | <b>Function</b>                                         |
|----------------|--------------------|-----------------------|----------------------|---------------------------------------------------------|
| <i>CsDof76</i> | TATA-box           | 1517                  | 1523                 | core promoter element around -30 of transcription start |
| <i>CsDof76</i> | TATA-box           | 1518                  | 1524                 | core promoter element around -30 of transcription start |
| <i>CsDof76</i> | TATA-box           | 1519                  | 1525                 | core promoter element around -30 of transcription start |
| <i>CsDof76</i> | TATA-box           | 1520                  | 1526                 | core promoter element around -30 of transcription start |
| <i>CsDof76</i> | TATA-box           | 1522                  | 1526                 | core promoter element around -30 of transcription start |
| <i>CsDof76</i> | TATA-box           | 1527                  | 1533                 | core promoter element around -30 of transcription start |
| <i>CsDof76</i> | TATA-box           | 1528                  | 1534                 | core promoter element around -30 of transcription start |
| <i>CsDof76</i> | TATA-box           | 1529                  | 1535                 | core promoter element around -30 of transcription start |
| <i>CsDof76</i> | TATA-box           | 1530                  | 1542                 | core promoter element around -30 of transcription start |
| <i>CsDof76</i> | TATA-box           | 1531                  | 1537                 | core promoter element around -30 of transcription start |
| <i>CsDof76</i> | TATA-box           | 1532                  | 1538                 | core promoter element around -30 of transcription start |
| <i>CsDof76</i> | TATA-box           | 1533                  | 1539                 | core promoter element around -30 of transcription start |
| <i>CsDof76</i> | TATA-box           | 1534                  | 1540                 | core promoter element around -30 of transcription start |
| <i>CsDof76</i> | TATA-box           | 1535                  | 1541                 | core promoter element around -30 of transcription start |
| <i>CsDof76</i> | TATA-box           | 1536                  | 1548                 | core promoter element around -30 of transcription start |
| <i>CsDof76</i> | TATA-box           | 1538                  | 1546                 | core promoter element around -30 of transcription start |
| <i>CsDof76</i> | TATA-box           | 1539                  | 1546                 | core promoter element around -30 of transcription start |
| <i>CsDof76</i> | TATA-box           | 1540                  | 1546                 | core promoter element around -30 of transcription start |
| <i>CsDof76</i> | TATA-box           | 1541                  | 1546                 | core promoter element around -30 of transcription start |
| <i>CsDof76</i> | TATA-box           | 1542                  | 1546                 | core promoter element around -30 of transcription start |
| <i>CsDof76</i> | TATA-box           | 1667                  | 1673                 | core promoter element around -30 of transcription start |
| <i>CsDof76</i> | TATA-box           | 1669                  | 1675                 | core promoter element around -30 of transcription start |
| <i>CsDof76</i> | TATA-box           | 1670                  | 1676                 | core promoter element around -30 of transcription start |
| <i>CsDof76</i> | TATA-box           | 1671                  | 1675                 | core promoter element around -30 of transcription start |
| <i>CsDof76</i> | TATA-box           | 1675                  | 1681                 | core promoter element around -30 of transcription start |
| <i>CsDof76</i> | TATA-box           | 1676                  | 1682                 | core promoter element around -30 of transcription start |
| <i>CsDof76</i> | TATA-box           | 1677                  | 1683                 | core promoter element around -30 of transcription start |
| <i>CsDof76</i> | TATA-box           | 1678                  | 1682                 | core promoter element around -30 of transcription start |
| <i>CsDof76</i> | TATA-box           | 1726                  | 1731                 | core promoter element around -30 of transcription start |
| <i>CsDof76</i> | TATA-box           | 1727                  | 1731                 | core promoter element around -30 of transcription start |
| <i>CsDof76</i> | TATA-box           | 1744                  | 1748                 | core promoter element around -30 of transcription start |
| <i>CsDof76</i> | TATA-box           | 1757                  | 1763                 | core promoter element around -30 of transcription start |
| <i>CsDof76</i> | TATA-box           | 1758                  | 1762                 | core promoter element around -30 of transcription start |
| <i>CsDof76</i> | TATA-box           | 1779                  | 1785                 | core promoter element around -30 of transcription start |
| <i>CsDof76</i> | TATA-box           | 1780                  | 1786                 | core promoter element around -30 of transcription start |
| <i>CsDof76</i> | TATA-box           | 1781                  | 1787                 | core promoter element around -30 of transcription start |
| <i>CsDof76</i> | TATA-box           | 1782                  | 1788                 | core promoter element around -30 of transcription start |
| <i>CsDof76</i> | TATA-box           | 1783                  | 1789                 | core promoter element around -30 of transcription start |
| <i>CsDof76</i> | TATA-box           | 1784                  | 1790                 | core promoter element around -30 of transcription start |
| <i>CsDof76</i> | TATA-box           | 1785                  | 1791                 | core promoter element around -30 of transcription start |
| <i>CsDof76</i> | TATA-box           | 1787                  | 1791                 | core promoter element around -30 of transcription start |
| <i>CsDof76</i> | TATA-box           | 1803                  | 1809                 | core promoter element around -30 of transcription start |
| <i>CsDof76</i> | TATA-box           | 1805                  | 1811                 | core promoter element around -30 of transcription start |
| <i>CsDof76</i> | TATA-box           | 1806                  | 1812                 | core promoter element around -30 of transcription start |
| <i>CsDof76</i> | TATA-box           | 1807                  | 1813                 | core promoter element around -30 of transcription start |
| <i>CsDof76</i> | TATA-box           | 1808                  | 1814                 | core promoter element around -30 of transcription start |
| <i>CsDof76</i> | TATA-box           | 1809                  | 1813                 | core promoter element around -30 of transcription start |
| <i>CsDof76</i> | TATA-box           | 1890                  | 1896                 | core promoter element around -30 of transcription start |
| <i>CsDof76</i> | TATA-box           | 1891                  | 1895                 | core promoter element around -30 of transcription start |
| <i>CsDof76</i> | GT1-motif          | 846                   | 853                  | light responsive element                                |
| <i>CsDof76</i> | MBS                | 159                   | 165                  | MYB binding site involved in drought-inducibility       |

| Name           | Cis-element | Start position | Stop position | Function                                                            |
|----------------|-------------|----------------|---------------|---------------------------------------------------------------------|
| <i>CsDof76</i> | MBS         | 1275           | 1281          | MYB binding site involved in drought-inducibility                   |
| <i>CsDof77</i> | ABRE        | 701            | 707           | abscisic acid responsiveness                                        |
| <i>CsDof77</i> | ABRE        | 702            | 707           | abscisic acid responsiveness                                        |
| <i>CsDof77</i> | TGA-element | 1757           | 1763          | auxin-responsive element                                            |
| <i>CsDof77</i> | TATC-box    | 761            | 768           | cis-acting element involved in gibberellin-responsiveness           |
| <i>CsDof77</i> | ARE         | 173            | 179           | cis-acting regulatory element essential for the anaerobic induction |
| <i>CsDof77</i> | ARE         | 191            | 197           | cis-acting regulatory element essential for the anaerobic induction |
| <i>CsDof77</i> | ARE         | 554            | 560           | cis-acting regulatory element essential for the anaerobic induction |
| <i>CsDof77</i> | ARE         | 1025           | 1031          | cis-acting regulatory element essential for the anaerobic induction |
| <i>CsDof77</i> | ARE         | 1069           | 1075          | cis-acting regulatory element essential for the anaerobic induction |
| <i>CsDof77</i> | ARE         | 1487           | 1493          | cis-acting regulatory element essential for the anaerobic induction |
| <i>CsDof77</i> | circadian   | 651            | 660           | cis-acting regulatory element involved in circadian control         |
| <i>CsDof77</i> | circadian   | 1602           | 1611          | cis-acting regulatory element involved in circadian control         |
| <i>CsDof77</i> | G-Box       | 701            | 707           | cis-acting regulatory element involved in light responsiveness      |
| <i>CsDof77</i> | G-box       | 700            | 708           | cis-acting regulatory element involved in light responsiveness      |
| <i>CsDof77</i> | G-box       | 701            | 707           | cis-acting regulatory element involved in light responsiveness      |
| <i>CsDof77</i> | CAAT-box    | 710            | 715           | common cis-acting element in promoter and enhancer regions          |
| <i>CsDof77</i> | CAAT-box    | 1157           | 1162          | common cis-acting element in promoter and enhancer regions          |
| <i>CsDof77</i> | CAAT-box    | 1433           | 1438          | common cis-acting element in promoter and enhancer regions          |
| <i>CsDof77</i> | CAAT-box    | 1716           | 1721          | common cis-acting element in promoter and enhancer regions          |
| <i>CsDof77</i> | CAAT-box    | 1873           | 1878          | common cis-acting element in promoter and enhancer regions          |
| <i>CsDof77</i> | CAAT-box    | 1895           | 1900          | common cis-acting element in promoter and enhancer regions          |
| <i>CsDof77</i> | TATA-box    | 5              | 10            | core promoter element around -30 of transcription start             |
| <i>CsDof77</i> | TATA-box    | 6              | 10            | core promoter element around -30 of transcription start             |
| <i>CsDof77</i> | TATA-box    | 23             | 29            | core promoter element around -30 of transcription start             |
| <i>CsDof77</i> | TATA-box    | 24             | 30            | core promoter element around -30 of transcription start             |
| <i>CsDof77</i> | TATA-box    | 26             | 30            | core promoter element around -30 of transcription start             |
| <i>CsDof77</i> | TATA-box    | 139            | 147           | core promoter element around -30 of transcription start             |
| <i>CsDof77</i> | TATA-box    | 143            | 152           | core promoter element around -30 of transcription start             |
| <i>CsDof77</i> | TATA-box    | 144            | 151           | core promoter element around -30 of transcription start             |
| <i>CsDof77</i> | TATA-box    | 145            | 151           | core promoter element around -30 of transcription start             |
| <i>CsDof77</i> | TATA-box    | 146            | 151           | core promoter element around -30 of transcription start             |
| <i>CsDof77</i> | TATA-box    | 147            | 151           | core promoter element around -30 of transcription start             |
| <i>CsDof77</i> | TATA-box    | 201            | 207           | core promoter element around -30 of transcription start             |
| <i>CsDof77</i> | TATA-box    | 202            | 206           | core promoter element around -30 of transcription start             |
| <i>CsDof77</i> | TATA-box    | 359            | 365           | core promoter element around -30 of transcription start             |
| <i>CsDof77</i> | TATA-box    | 361            | 365           | core promoter element around -30 of transcription start             |
| <i>CsDof77</i> | TATA-box    | 377            | 383           | core promoter element around -30 of transcription start             |
| <i>CsDof77</i> | TATA-box    | 379            | 383           | core promoter element around -30 of transcription start             |
| <i>CsDof77</i> | TATA-box    | 884            | 890           | core promoter element around -30 of transcription start             |
| <i>CsDof77</i> | TATA-box    | 885            | 889           | core promoter element around -30 of transcription start             |
| <i>CsDof77</i> | TATA-box    | 942            | 947           | core promoter element around -30 of transcription start             |
| <i>CsDof77</i> | TATA-box    | 943            | 947           | core promoter element around -30 of transcription start             |
| <i>CsDof77</i> | TATA-box    | 948            | 954           | core promoter element around -30 of transcription start             |
| <i>CsDof77</i> | TATA-box    | 949            | 956           | core promoter element around -30 of transcription start             |
| <i>CsDof77</i> | TATA-box    | 950            | 956           | core promoter element around -30 of transcription start             |
| <i>CsDof77</i> | TATA-box    | 951            | 957           | core promoter element around -30 of transcription start             |
| <i>CsDof77</i> | TATA-box    | 952            | 956           | core promoter element around -30 of transcription start             |
| <i>CsDof77</i> | TATA-box    | 1131           | 1137          | core promoter element around -30 of transcription start             |
| <i>CsDof77</i> | TATA-box    | 1133           | 1137          | core promoter element around -30 of transcription start             |
| <i>CsDof77</i> | TATA-box    | 1140           | 1146          | core promoter element around -30 of transcription start             |

| Name           | Cis-element      | Start position | Stop position | Function                                                             |
|----------------|------------------|----------------|---------------|----------------------------------------------------------------------|
| <i>CsDof77</i> | TATA-box         | 1142           | 1146          | core promoter element around -30 of transcription start              |
| <i>CsDof77</i> | TATA-box         | 1227           | 1233          | core promoter element around -30 of transcription start              |
| <i>CsDof77</i> | TATA-box         | 1228           | 1232          | core promoter element around -30 of transcription start              |
| <i>CsDof77</i> | TATA-box         | 1625           | 1633          | core promoter element around -30 of transcription start              |
| <i>CsDof77</i> | TATA-box         | 1771           | 1775          | core promoter element around -30 of transcription start              |
| <i>CsDof77</i> | TATA-box         | 1790           | 1796          | core promoter element around -30 of transcription start              |
| <i>CsDof77</i> | TATA-box         | 1792           | 1798          | core promoter element around -30 of transcription start              |
| <i>CsDof77</i> | TATA-box         | 1793           | 1799          | core promoter element around -30 of transcription start              |
| <i>CsDof77</i> | TATA-box         | 1794           | 1800          | core promoter element around -30 of transcription start              |
| <i>CsDof77</i> | TATA-box         | 1795           | 1801          | core promoter element around -30 of transcription start              |
| <i>CsDof77</i> | TATA-box         | 1796           | 1802          | core promoter element around -30 of transcription start              |
| <i>CsDof77</i> | TATA-box         | 1797           | 1803          | core promoter element around -30 of transcription start              |
| <i>CsDof77</i> | TATA-box         | 1798           | 1804          | core promoter element around -30 of transcription start              |
| <i>CsDof77</i> | TATA-box         | 1799           | 1805          | core promoter element around -30 of transcription start              |
| <i>CsDof77</i> | TATA-box         | 1800           | 1806          | core promoter element around -30 of transcription start              |
| <i>CsDof77</i> | TATA-box         | 1801           | 1807          | core promoter element around -30 of transcription start              |
| <i>CsDof77</i> | TATA-box         | 1802           | 1808          | core promoter element around -30 of transcription start              |
| <i>CsDof77</i> | TATA-box         | 1803           | 1809          | core promoter element around -30 of transcription start              |
| <i>CsDof77</i> | TATA-box         | 1804           | 1808          | core promoter element around -30 of transcription start              |
| <i>CsDof77</i> | TATA-box         | 1973           | 1979          | core promoter element around -30 of transcription start              |
| <i>CsDof77</i> | TATA-box         | 1974           | 1979          | core promoter element around -30 of transcription start              |
| <i>CsDof77</i> | TATA-box         | 1975           | 1979          | core promoter element around -30 of transcription start              |
| <i>CsDof77</i> | AT-rich sequence | 1861           | 1870          | element for maximal elicitor-mediated activation (2copies)           |
| <i>CsDof77</i> | MBSI             | 1039           | 1049.5        | MYB binding site involved in flavonoid biosynthetic genes regulation |
| <i>CsDof77</i> | MRE              | 1500           | 1507          | MYB binding site involved in light responsiveness                    |
| <i>CsDof77</i> | CCAAT-box        | 878            | 884           | MYBHv1 binding site                                                  |
| <i>CsDof78</i> | ABRE             | 175            | 184           | abscisic acid responsiveness                                         |
| <i>CsDof78</i> | ABRE             | 177            | 182           | abscisic acid responsiveness                                         |
| <i>CsDof78</i> | ABRE             | 182            | 187           | abscisic acid responsiveness                                         |
| <i>CsDof78</i> | ABRE             | 448            | 453           | abscisic acid responsiveness                                         |
| <i>CsDof78</i> | ABRE             | 746            | 754           | abscisic acid responsiveness                                         |
| <i>CsDof78</i> | ABRE             | 748            | 753           | abscisic acid responsiveness                                         |
| <i>CsDof78</i> | ACE              | 746            | 755           | cis-acting element involved in light responsiveness                  |
| <i>CsDof78</i> | LTR              | 798            | 804           | cis-acting element involved in low-temperature responsiveness        |
| <i>CsDof78</i> | LTR              | 1710           | 1716          | cis-acting element involved in low-temperature responsiveness        |
| <i>CsDof78</i> | TCA-element      | 136            | 146           | cis-acting element involved in salicylic acid responsiveness         |
| <i>CsDof78</i> | SARE             | 1051           | 1062          | cis-acting element involved in salicylic acid responsiveness         |
| <i>CsDof78</i> | ARE              | 377            | 383           | cis-acting regulatory element essential for the anaerobic induction  |
| <i>CsDof78</i> | ARE              | 421            | 427           | cis-acting regulatory element essential for the anaerobic induction  |
| <i>CsDof78</i> | G-box            | 177            | 183           | cis-acting regulatory element involved in light responsiveness       |
| <i>CsDof78</i> | G-box            | 181            | 187           | cis-acting regulatory element involved in light responsiveness       |
| <i>CsDof78</i> | G-box            | 448            | 454           | cis-acting regulatory element involved in light responsiveness       |
| <i>CsDof78</i> | G-box            | 748            | 754           | cis-acting regulatory element involved in light responsiveness       |
| <i>CsDof78</i> | O2-site          | 29             | 37            | cis-acting regulatory element involved in zein metabolism regulation |
| <i>CsDof78</i> | CAAT-box         | 115            | 120           | common cis-acting element in promoter and enhancer regions           |
| <i>CsDof78</i> | CAAT-box         | 370            | 375           | common cis-acting element in promoter and enhancer regions           |
| <i>CsDof78</i> | CAAT-box         | 731            | 736           | common cis-acting element in promoter and enhancer regions           |
| <i>CsDof78</i> | CAAT-box         | 805            | 810           | common cis-acting element in promoter and enhancer regions           |
| <i>CsDof78</i> | CAAT-box         | 867            | 872           | common cis-acting element in promoter and enhancer regions           |
| <i>CsDof78</i> | CAAT-box         | 999            | 1004          | common cis-acting element in promoter and enhancer regions           |
| <i>CsDof78</i> | CAAT-box         | 1107           | 1112          | common cis-acting element in promoter and enhancer regions           |

| <b>Name</b>    | <b>Cis-element</b> | <b>Start position</b> | <b>Stop position</b> | <b>Function</b>                                            |
|----------------|--------------------|-----------------------|----------------------|------------------------------------------------------------|
| <i>CsDof78</i> | CAAT-box           | 1631                  | 1636                 | common cis-acting element in promoter and enhancer regions |
| <i>CsDof78</i> | CAAT-box           | 1776                  | 1781                 | common cis-acting element in promoter and enhancer regions |
| <i>CsDof78</i> | CAAT-box           | 1909                  | 1914                 | common cis-acting element in promoter and enhancer regions |
| <i>CsDof78</i> | TATA-box           | 71                    | 77                   | core promoter element around -30 of transcription start    |
| <i>CsDof78</i> | TATA-box           | 72                    | 77                   | core promoter element around -30 of transcription start    |
| <i>CsDof78</i> | TATA-box           | 73                    | 77                   | core promoter element around -30 of transcription start    |
| <i>CsDof78</i> | TATA-box           | 103                   | 110                  | core promoter element around -30 of transcription start    |
| <i>CsDof78</i> | TATA-box           | 126                   | 130                  | core promoter element around -30 of transcription start    |
| <i>CsDof78</i> | TATA-box           | 167                   | 171                  | core promoter element around -30 of transcription start    |
| <i>CsDof78</i> | TATA-box           | 270                   | 275                  | core promoter element around -30 of transcription start    |
| <i>CsDof78</i> | TATA-box           | 271                   | 275                  | core promoter element around -30 of transcription start    |
| <i>CsDof78</i> | TATA-box           | 288                   | 296                  | core promoter element around -30 of transcription start    |
| <i>CsDof78</i> | TATA-box           | 356                   | 360                  | core promoter element around -30 of transcription start    |
| <i>CsDof78</i> | TATA-box           | 380                   | 388                  | core promoter element around -30 of transcription start    |
| <i>CsDof78</i> | TATA-box           | 489                   | 497                  | core promoter element around -30 of transcription start    |
| <i>CsDof78</i> | TATA-box           | 497                   | 504                  | core promoter element around -30 of transcription start    |
| <i>CsDof78</i> | TATA-box           | 498                   | 504                  | core promoter element around -30 of transcription start    |
| <i>CsDof78</i> | TATA-box           | 499                   | 504                  | core promoter element around -30 of transcription start    |
| <i>CsDof78</i> | TATA-box           | 500                   | 504                  | core promoter element around -30 of transcription start    |
| <i>CsDof78</i> | TATA-box           | 530                   | 535                  | core promoter element around -30 of transcription start    |
| <i>CsDof78</i> | TATA-box           | 531                   | 535                  | core promoter element around -30 of transcription start    |
| <i>CsDof78</i> | TATA-box           | 544                   | 548                  | core promoter element around -30 of transcription start    |
| <i>CsDof78</i> | TATA-box           | 549                   | 556                  | core promoter element around -30 of transcription start    |
| <i>CsDof78</i> | TATA-box           | 555                   | 561                  | core promoter element around -30 of transcription start    |
| <i>CsDof78</i> | TATA-box           | 556                   | 562                  | core promoter element around -30 of transcription start    |
| <i>CsDof78</i> | TATA-box           | 557                   | 563                  | core promoter element around -30 of transcription start    |
| <i>CsDof78</i> | TATA-box           | 558                   | 562                  | core promoter element around -30 of transcription start    |
| <i>CsDof78</i> | TATA-box           | 590                   | 595                  | core promoter element around -30 of transcription start    |
| <i>CsDof78</i> | TATA-box           | 591                   | 595                  | core promoter element around -30 of transcription start    |
| <i>CsDof78</i> | TATA-box           | 603                   | 607                  | core promoter element around -30 of transcription start    |
| <i>CsDof78</i> | TATA-box           | 627                   | 633                  | core promoter element around -30 of transcription start    |
| <i>CsDof78</i> | TATA-box           | 628                   | 634                  | core promoter element around -30 of transcription start    |
| <i>CsDof78</i> | TATA-box           | 629                   | 635                  | core promoter element around -30 of transcription start    |
| <i>CsDof78</i> | TATA-box           | 630                   | 636                  | core promoter element around -30 of transcription start    |
| <i>CsDof78</i> | TATA-box           | 631                   | 635                  | core promoter element around -30 of transcription start    |
| <i>CsDof78</i> | TATA-box           | 664                   | 669                  | core promoter element around -30 of transcription start    |
| <i>CsDof78</i> | TATA-box           | 665                   | 669                  | core promoter element around -30 of transcription start    |
| <i>CsDof78</i> | TATA-box           | 740                   | 744                  | core promoter element around -30 of transcription start    |
| <i>CsDof78</i> | TATA-box           | 752                   | 756                  | core promoter element around -30 of transcription start    |
| <i>CsDof78</i> | TATA-box           | 766                   | 772                  | core promoter element around -30 of transcription start    |
| <i>CsDof78</i> | TATA-box           | 767                   | 772                  | core promoter element around -30 of transcription start    |
| <i>CsDof78</i> | TATA-box           | 768                   | 772                  | core promoter element around -30 of transcription start    |
| <i>CsDof78</i> | TATA-box           | 775                   | 781                  | core promoter element around -30 of transcription start    |
| <i>CsDof78</i> | TATA-box           | 776                   | 782                  | core promoter element around -30 of transcription start    |
| <i>CsDof78</i> | TATA-box           | 778                   | 782                  | core promoter element around -30 of transcription start    |
| <i>CsDof78</i> | TATA-box           | 1163                  | 1170                 | core promoter element around -30 of transcription start    |
| <i>CsDof78</i> | TATA-box           | 1414                  | 1421                 | core promoter element around -30 of transcription start    |
| <i>CsDof78</i> | TATA-box           | 1415                  | 1421                 | core promoter element around -30 of transcription start    |
| <i>CsDof78</i> | TATA-box           | 1416                  | 1421                 | core promoter element around -30 of transcription start    |
| <i>CsDof78</i> | TATA-box           | 1417                  | 1421                 | core promoter element around -30 of transcription start    |
| <i>CsDof78</i> | TATA-box           | 1445                  | 1450                 | core promoter element around -30 of transcription start    |

| Name           | Cis-element        | Start position | Stop position | Function                                                            |
|----------------|--------------------|----------------|---------------|---------------------------------------------------------------------|
| <i>CsDof78</i> | TATA-box           | 1446           | 1450          | core promoter element around -30 of transcription start             |
| <i>CsDof78</i> | TATA-box           | 1451           | 1458          | core promoter element around -30 of transcription start             |
| <i>CsDof78</i> | TATA-box           | 1457           | 1463          | core promoter element around -30 of transcription start             |
| <i>CsDof78</i> | TATA-box           | 1458           | 1464          | core promoter element around -30 of transcription start             |
| <i>CsDof78</i> | TATA-box           | 1459           | 1465          | core promoter element around -30 of transcription start             |
| <i>CsDof78</i> | TATA-box           | 1460           | 1464          | core promoter element around -30 of transcription start             |
| <i>CsDof78</i> | TATA-box           | 1490           | 1495          | core promoter element around -30 of transcription start             |
| <i>CsDof78</i> | TATA-box           | 1491           | 1495          | core promoter element around -30 of transcription start             |
| <i>CsDof78</i> | TATA-box           | 1503           | 1507          | core promoter element around -30 of transcription start             |
| <i>CsDof78</i> | TATA-box           | 1527           | 1533          | core promoter element around -30 of transcription start             |
| <i>CsDof78</i> | TATA-box           | 1528           | 1534          | core promoter element around -30 of transcription start             |
| <i>CsDof78</i> | TATA-box           | 1529           | 1535          | core promoter element around -30 of transcription start             |
| <i>CsDof78</i> | TATA-box           | 1530           | 1536          | core promoter element around -30 of transcription start             |
| <i>CsDof78</i> | TATA-box           | 1531           | 1535          | core promoter element around -30 of transcription start             |
| <i>CsDof78</i> | TATA-box           | 1564           | 1569          | core promoter element around -30 of transcription start             |
| <i>CsDof78</i> | TATA-box           | 1565           | 1569          | core promoter element around -30 of transcription start             |
| <i>CsDof78</i> | TATA-box           | 1640           | 1644          | core promoter element around -30 of transcription start             |
| <i>CsDof78</i> | TATA-box           | 1652           | 1656          | core promoter element around -30 of transcription start             |
| <i>CsDof78</i> | TATA-box           | 1678           | 1684          | core promoter element around -30 of transcription start             |
| <i>CsDof78</i> | TATA-box           | 1679           | 1684          | core promoter element around -30 of transcription start             |
| <i>CsDof78</i> | TATA-box           | 1680           | 1684          | core promoter element around -30 of transcription start             |
| <i>CsDof78</i> | TATA-box           | 1687           | 1693          | core promoter element around -30 of transcription start             |
| <i>CsDof78</i> | TATA-box           | 1688           | 1694          | core promoter element around -30 of transcription start             |
| <i>CsDof78</i> | TATA-box           | 1690           | 1694          | core promoter element around -30 of transcription start             |
| <i>CsDof78</i> | 3-AF1 binding site | 651            | 661           | light responsive element                                            |
| <i>CsDof78</i> | 3-AF1 binding site | 948            | 958           | light responsive element                                            |
| <i>CsDof78</i> | 3-AF1 binding site | 1171           | 1181          | light responsive element                                            |
| <i>CsDof78</i> | 3-AF1 binding site | 1551           | 1561          | light responsive element                                            |
| <i>CsDof78</i> | 3-AF1 binding site | 1857           | 1867          | light responsive element                                            |
| <i>CsDof79</i> | ABRE               | 468            | 473           | abscisic acid responsiveness                                        |
| <i>CsDof79</i> | ABRE               | 744            | 750           | abscisic acid responsiveness                                        |
| <i>CsDof79</i> | ABRE               | 745            | 750           | abscisic acid responsiveness                                        |
| <i>CsDof79</i> | ABRE               | 1548           | 1557          | abscisic acid responsiveness                                        |
| <i>CsDof79</i> | ABRE               | 1807           | 1812          | abscisic acid responsiveness                                        |
| <i>CsDof79</i> | TCA-element        | 1307           | 1317          | cis-acting element involved in salicylic acid responsiveness        |
| <i>CsDof79</i> | TCA-element        | 1532           | 1541          | cis-acting element involved in salicylic acid responsiveness        |
| <i>CsDof79</i> | ARE                | 1453           | 1459          | cis-acting regulatory element essential for the anaerobic induction |
| <i>CsDof79</i> | G-box              | 28             | 37            | cis-acting regulatory element involved in light responsiveness      |
| <i>CsDof79</i> | G-box              | 468            | 474           | cis-acting regulatory element involved in light responsiveness      |
| <i>CsDof79</i> | G-box              | 744            | 750           | cis-acting regulatory element involved in light responsiveness      |
| <i>CsDof79</i> | G-box              | 1512           | 1518          | cis-acting regulatory element involved in light responsiveness      |
| <i>CsDof79</i> | G-box              | 1807           | 1815          | cis-acting regulatory element involved in light responsiveness      |
| <i>CsDof79</i> | G-Box              | 744            | 750           | cis-acting regulatory element involved in light responsiveness      |
| <i>CsDof79</i> | G-Box              | 1807           | 1813          | cis-acting regulatory element involved in light responsiveness      |
| <i>CsDof79</i> | CAT-box            | 1937           | 1943          | cis-acting regulatory element related to meristem expression        |
| <i>CsDof79</i> | CAT-box            | 1941           | 1947          | cis-acting regulatory element related to meristem expression        |
| <i>CsDof79</i> | CAAT-box           | 75             | 80            | common cis-acting element in promoter and enhancer regions          |
| <i>CsDof79</i> | CAAT-box           | 99             | 104           | common cis-acting element in promoter and enhancer regions          |
| <i>CsDof79</i> | CAAT-box           | 189            | 194           | common cis-acting element in promoter and enhancer regions          |
| <i>CsDof79</i> | CAAT-box           | 296            | 301           | common cis-acting element in promoter and enhancer regions          |
| <i>CsDof79</i> | CAAT-box           | 337            | 342           | common cis-acting element in promoter and enhancer regions          |

| Name           | Cis-element | Start position | Stop position | Function                                                   |
|----------------|-------------|----------------|---------------|------------------------------------------------------------|
| <i>CsDof79</i> | CAAT-box    | 506            | 511           | common cis-acting element in promoter and enhancer regions |
| <i>CsDof79</i> | CAAT-box    | 851            | 856           | common cis-acting element in promoter and enhancer regions |
| <i>CsDof79</i> | CAAT-box    | 869            | 874           | common cis-acting element in promoter and enhancer regions |
| <i>CsDof79</i> | CAAT-box    | 1409           | 1414          | common cis-acting element in promoter and enhancer regions |
| <i>CsDof79</i> | CAAT-box    | 1544           | 1549          | common cis-acting element in promoter and enhancer regions |
| <i>CsDof79</i> | CAAT-box    | 1577           | 1582          | common cis-acting element in promoter and enhancer regions |
| <i>CsDof79</i> | CAAT-box    | 1653           | 1658          | common cis-acting element in promoter and enhancer regions |
| <i>CsDof79</i> | CAAT-box    | 1687           | 1692          | common cis-acting element in promoter and enhancer regions |
| <i>CsDof79</i> | CAAT-box    | 1744           | 1749          | common cis-acting element in promoter and enhancer regions |
| <i>CsDof79</i> | CAAT-box    | 1958           | 1963          | common cis-acting element in promoter and enhancer regions |
| <i>CsDof79</i> | TATA-box    | 53             | 59            | core promoter element around -30 of transcription start    |
| <i>CsDof79</i> | TATA-box    | 54             | 59            | core promoter element around -30 of transcription start    |
| <i>CsDof79</i> | TATA-box    | 55             | 59            | core promoter element around -30 of transcription start    |
| <i>CsDof79</i> | TATA-box    | 78             | 84            | core promoter element around -30 of transcription start    |
| <i>CsDof79</i> | TATA-box    | 79             | 86            | core promoter element around -30 of transcription start    |
| <i>CsDof79</i> | TATA-box    | 80             | 86            | core promoter element around -30 of transcription start    |
| <i>CsDof79</i> | TATA-box    | 81             | 87            | core promoter element around -30 of transcription start    |
| <i>CsDof79</i> | TATA-box    | 82             | 86            | core promoter element around -30 of transcription start    |
| <i>CsDof79</i> | TATA-box    | 92             | 98            | core promoter element around -30 of transcription start    |
| <i>CsDof79</i> | TATA-box    | 93             | 98            | core promoter element around -30 of transcription start    |
| <i>CsDof79</i> | TATA-box    | 94             | 98            | core promoter element around -30 of transcription start    |
| <i>CsDof79</i> | TATA-box    | 119            | 125           | core promoter element around -30 of transcription start    |
| <i>CsDof79</i> | TATA-box    | 120            | 126           | core promoter element around -30 of transcription start    |
| <i>CsDof79</i> | TATA-box    | 121            | 125           | core promoter element around -30 of transcription start    |
| <i>CsDof79</i> | TATA-box    | 237            | 244           | core promoter element around -30 of transcription start    |
| <i>CsDof79</i> | TATA-box    | 410            | 417           | core promoter element around -30 of transcription start    |
| <i>CsDof79</i> | TATA-box    | 446            | 452           | core promoter element around -30 of transcription start    |
| <i>CsDof79</i> | TATA-box    | 447            | 451           | core promoter element around -30 of transcription start    |
| <i>CsDof79</i> | TATA-box    | 529            | 535           | core promoter element around -30 of transcription start    |
| <i>CsDof79</i> | TATA-box    | 530            | 534           | core promoter element around -30 of transcription start    |
| <i>CsDof79</i> | TATA-box    | 579            | 583           | core promoter element around -30 of transcription start    |
| <i>CsDof79</i> | TATA-box    | 608            | 613           | core promoter element around -30 of transcription start    |
| <i>CsDof79</i> | TATA-box    | 609            | 613           | core promoter element around -30 of transcription start    |
| <i>CsDof79</i> | TATA-box    | 802            | 806           | core promoter element around -30 of transcription start    |
| <i>CsDof79</i> | TATA-box    | 822            | 828           | core promoter element around -30 of transcription start    |
| <i>CsDof79</i> | TATA-box    | 823            | 827           | core promoter element around -30 of transcription start    |
| <i>CsDof79</i> | TATA-box    | 962            | 966           | core promoter element around -30 of transcription start    |
| <i>CsDof79</i> | TATA-box    | 988            | 994           | core promoter element around -30 of transcription start    |
| <i>CsDof79</i> | TATA-box    | 989            | 994           | core promoter element around -30 of transcription start    |
| <i>CsDof79</i> | TATA-box    | 990            | 994           | core promoter element around -30 of transcription start    |
| <i>CsDof79</i> | TATA-box    | 1009           | 1013          | core promoter element around -30 of transcription start    |
| <i>CsDof79</i> | TATA-box    | 1029           | 1035          | core promoter element around -30 of transcription start    |
| <i>CsDof79</i> | TATA-box    | 1030           | 1036          | core promoter element around -30 of transcription start    |
| <i>CsDof79</i> | TATA-box    | 1031           | 1037          | core promoter element around -30 of transcription start    |
| <i>CsDof79</i> | TATA-box    | 1032           | 1036          | core promoter element around -30 of transcription start    |
| <i>CsDof79</i> | TATA-box    | 1035           | 1041          | core promoter element around -30 of transcription start    |
| <i>CsDof79</i> | TATA-box    | 1036           | 1043          | core promoter element around -30 of transcription start    |
| <i>CsDof79</i> | TATA-box    | 1037           | 1043          | core promoter element around -30 of transcription start    |
| <i>CsDof79</i> | TATA-box    | 1039           | 1043          | core promoter element around -30 of transcription start    |
| <i>CsDof79</i> | TATA-box    | 1045           | 1051          | core promoter element around -30 of transcription start    |
| <i>CsDof79</i> | TATA-box    | 1046           | 1052          | core promoter element around -30 of transcription start    |

| Name           | Cis-element      | Start position | Stop position | Function                                                            |
|----------------|------------------|----------------|---------------|---------------------------------------------------------------------|
| <i>CsDof79</i> | TATA-box         | 1047           | 1051          | core promoter element around -30 of transcription start             |
| <i>CsDof79</i> | TATA-box         | 1059           | 1065          | core promoter element around -30 of transcription start             |
| <i>CsDof79</i> | TATA-box         | 1060           | 1066          | core promoter element around -30 of transcription start             |
| <i>CsDof79</i> | TATA-box         | 1061           | 1067          | core promoter element around -30 of transcription start             |
| <i>CsDof79</i> | TATA-box         | 1062           | 1068          | core promoter element around -30 of transcription start             |
| <i>CsDof79</i> | TATA-box         | 1063           | 1069          | core promoter element around -30 of transcription start             |
| <i>CsDof79</i> | TATA-box         | 1065           | 1069          | core promoter element around -30 of transcription start             |
| <i>CsDof79</i> | TATA-box         | 1278           | 1284          | core promoter element around -30 of transcription start             |
| <i>CsDof79</i> | TATA-box         | 1279           | 1283          | core promoter element around -30 of transcription start             |
| <i>CsDof79</i> | TATA-box         | 1320           | 1326          | core promoter element around -30 of transcription start             |
| <i>CsDof79</i> | TATA-box         | 1321           | 1326          | core promoter element around -30 of transcription start             |
| <i>CsDof79</i> | TATA-box         | 1322           | 1326          | core promoter element around -30 of transcription start             |
| <i>CsDof79</i> | TATA-box         | 1487           | 1495          | core promoter element around -30 of transcription start             |
| <i>CsDof79</i> | TATA-box         | 1558           | 1564          | core promoter element around -30 of transcription start             |
| <i>CsDof79</i> | TATA-box         | 1559           | 1564          | core promoter element around -30 of transcription start             |
| <i>CsDof79</i> | TATA-box         | 1560           | 1564          | core promoter element around -30 of transcription start             |
| <i>CsDof79</i> | TATA-box         | 1714           | 1720          | core promoter element around -30 of transcription start             |
| <i>CsDof79</i> | TATA-box         | 1715           | 1722          | core promoter element around -30 of transcription start             |
| <i>CsDof79</i> | TATA-box         | 1716           | 1722          | core promoter element around -30 of transcription start             |
| <i>CsDof79</i> | TATA-box         | 1717           | 1723          | core promoter element around -30 of transcription start             |
| <i>CsDof79</i> | TATA-box         | 1718           | 1722          | core promoter element around -30 of transcription start             |
| <i>CsDof79</i> | TATA-box         | 1899           | 1905          | core promoter element around -30 of transcription start             |
| <i>CsDof79</i> | TATA-box         | 1900           | 1906          | core promoter element around -30 of transcription start             |
| <i>CsDof79</i> | TATA-box         | 1901           | 1907          | core promoter element around -30 of transcription start             |
| <i>CsDof79</i> | TATA-box         | 1902           | 1906          | core promoter element around -30 of transcription start             |
| <i>CsDof79</i> | TATA-box         | 1927           | 1931          | core promoter element around -30 of transcription start             |
| <i>CsDof79</i> | TATA-box         | 1991           | 1995          | core promoter element around -30 of transcription start             |
| <i>CsDof79</i> | AT-rich sequence | 532            | 541           | element for maximal elicitor-mediated activation (2copies)          |
| <i>CsDof79</i> | AT-rich sequence | 1325           | 1334          | element for maximal elicitor-mediated activation (2copies)          |
| <i>CsDof79</i> | Sp1              | 1802           | 1808          | light responsive element                                            |
| <i>CsDof79</i> | GT1-motif        | 502            | 508           | light responsive element                                            |
| <i>CsDof80</i> | ABRE             | 1684           | 1689          | abscisic acid responsiveness                                        |
| <i>CsDof80</i> | ABRE             | 1829           | 1834          | abscisic acid responsiveness                                        |
| <i>CsDof80</i> | LTR              | 969            | 975           | cis-acting element involved in low-temperature responsiveness       |
| <i>CsDof80</i> | TCA-element      | 604            | 613           | cis-acting element involved in salicylic acid responsiveness        |
| <i>CsDof80</i> | TCA-element      | 1643           | 1652          | cis-acting element involved in salicylic acid responsiveness        |
| <i>CsDof80</i> | TCA-element      | 1899           | 1908          | cis-acting element involved in salicylic acid responsiveness        |
| <i>CsDof80</i> | SARE             | 607            | 618           | cis-acting element involved in salicylic acid responsiveness        |
| <i>CsDof80</i> | ARE              | 327            | 333           | cis-acting regulatory element essential for the anaerobic induction |
| <i>CsDof80</i> | ARE              | 418            | 424           | cis-acting regulatory element essential for the anaerobic induction |
| <i>CsDof80</i> | ARE              | 574            | 580           | cis-acting regulatory element essential for the anaerobic induction |
| <i>CsDof80</i> | ARE              | 836            | 842           | cis-acting regulatory element essential for the anaerobic induction |
| <i>CsDof80</i> | AuxRR-core       | 10             | 17            | cis-acting regulatory element involved in auxin responsiveness      |
| <i>CsDof80</i> | G-box            | 1683           | 1689          | cis-acting regulatory element involved in light responsiveness      |
| <i>CsDof80</i> | G-box            | 1828           | 1834          | cis-acting regulatory element involved in light responsiveness      |
| <i>CsDof80</i> | TGACG-motif      | 1682           | 1687          | cis-acting regulatory element involved in the MeJA-responsiveness   |
| <i>CsDof80</i> | CGTCA-motif      | 1682           | 1687          | cis-acting regulatory element involved in the MeJA-responsiveness   |
| <i>CsDof80</i> | CAT-box          | 121            | 127           | cis-acting regulatory element related to meristem expression        |
| <i>CsDof80</i> | CAT-box          | 1718           | 1724          | cis-acting regulatory element related to meristem expression        |
| <i>CsDof80</i> | GCN4_motif       | 1050           | 1057          | cis-regulatory element involved in endosperm expression             |
| <i>CsDof80</i> | CAAT-box         | 33             | 38            | common cis-acting element in promoter and enhancer regions          |



| Name           | Cis-element | Start position | Stop position | Function                                                   |
|----------------|-------------|----------------|---------------|------------------------------------------------------------|
| <i>CsDof80</i> | CAAT-box    | 265            | 270           | common cis-acting element in promoter and enhancer regions |
| <i>CsDof80</i> | CAAT-box    | 268            | 273           | common cis-acting element in promoter and enhancer regions |
| <i>CsDof80</i> | CAAT-box    | 390            | 395           | common cis-acting element in promoter and enhancer regions |
| <i>CsDof80</i> | CAAT-box    | 395            | 400           | common cis-acting element in promoter and enhancer regions |
| <i>CsDof80</i> | CAAT-box    | 473            | 478           | common cis-acting element in promoter and enhancer regions |
| <i>CsDof80</i> | CAAT-box    | 615            | 620           | common cis-acting element in promoter and enhancer regions |
| <i>CsDof80</i> | CAAT-box    | 959            | 964           | common cis-acting element in promoter and enhancer regions |
| <i>CsDof80</i> | CAAT-box    | 1011           | 1016          | common cis-acting element in promoter and enhancer regions |
| <i>CsDof80</i> | CAAT-box    | 1027           | 1032          | common cis-acting element in promoter and enhancer regions |
| <i>CsDof80</i> | CAAT-box    | 1190           | 1195          | common cis-acting element in promoter and enhancer regions |
| <i>CsDof80</i> | CAAT-box    | 1229           | 1234          | common cis-acting element in promoter and enhancer regions |
| <i>CsDof80</i> | CAAT-box    | 1707           | 1712          | common cis-acting element in promoter and enhancer regions |
| <i>CsDof80</i> | CAAT-box    | 1931           | 1936          | common cis-acting element in promoter and enhancer regions |
| <i>CsDof80</i> | CAAT-box    | 1958           | 1963          | common cis-acting element in promoter and enhancer regions |
| <i>CsDof80</i> | TATA-box    | 28             | 32            | core promoter element around -30 of transcription start    |
| <i>CsDof80</i> | TATA-box    | 139            | 143           | core promoter element around -30 of transcription start    |
| <i>CsDof80</i> | TATA-box    | 450            | 459           | core promoter element around -30 of transcription start    |
| <i>CsDof80</i> | TATA-box    | 451            | 458           | core promoter element around -30 of transcription start    |
| <i>CsDof80</i> | TATA-box    | 452            | 458           | core promoter element around -30 of transcription start    |
| <i>CsDof80</i> | TATA-box    | 453            | 458           | core promoter element around -30 of transcription start    |
| <i>CsDof80</i> | TATA-box    | 454            | 458           | core promoter element around -30 of transcription start    |
| <i>CsDof80</i> | TATA-box    | 539            | 544           | core promoter element around -30 of transcription start    |
| <i>CsDof80</i> | TATA-box    | 540            | 544           | core promoter element around -30 of transcription start    |
| <i>CsDof80</i> | TATA-box    | 602            | 608           | core promoter element around -30 of transcription start    |
| <i>CsDof80</i> | TATA-box    | 603            | 607           | core promoter element around -30 of transcription start    |
| <i>CsDof80</i> | TATA-box    | 644            | 648           | core promoter element around -30 of transcription start    |
| <i>CsDof80</i> | TATA-box    | 720            | 727           | core promoter element around -30 of transcription start    |
| <i>CsDof80</i> | TATA-box    | 721            | 727           | core promoter element around -30 of transcription start    |
| <i>CsDof80</i> | TATA-box    | 722            | 727           | core promoter element around -30 of transcription start    |
| <i>CsDof80</i> | TATA-box    | 723            | 727           | core promoter element around -30 of transcription start    |
| <i>CsDof80</i> | TATA-box    | 725            | 733           | core promoter element around -30 of transcription start    |
| <i>CsDof80</i> | TATA-box    | 726            | 733           | core promoter element around -30 of transcription start    |
| <i>CsDof80</i> | TATA-box    | 727            | 733           | core promoter element around -30 of transcription start    |
| <i>CsDof80</i> | TATA-box    | 728            | 733           | core promoter element around -30 of transcription start    |
| <i>CsDof80</i> | TATA-box    | 729            | 733           | core promoter element around -30 of transcription start    |
| <i>CsDof80</i> | TATA-box    | 745            | 753           | core promoter element around -30 of transcription start    |
| <i>CsDof80</i> | TATA-box    | 816            | 825           | core promoter element around -30 of transcription start    |
| <i>CsDof80</i> | TATA-box    | 817            | 824           | core promoter element around -30 of transcription start    |
| <i>CsDof80</i> | TATA-box    | 818            | 824           | core promoter element around -30 of transcription start    |
| <i>CsDof80</i> | TATA-box    | 819            | 826           | core promoter element around -30 of transcription start    |
| <i>CsDof80</i> | TATA-box    | 820            | 826           | core promoter element around -30 of transcription start    |
| <i>CsDof80</i> | TATA-box    | 821            | 827           | core promoter element around -30 of transcription start    |
| <i>CsDof80</i> | TATA-box    | 822            | 826           | core promoter element around -30 of transcription start    |
| <i>CsDof80</i> | TATA-box    | 1017           | 1021          | core promoter element around -30 of transcription start    |
| <i>CsDof80</i> | TATA-box    | 1061           | 1065          | core promoter element around -30 of transcription start    |
| <i>CsDof80</i> | TATA-box    | 1066           | 1070          | core promoter element around -30 of transcription start    |
| <i>CsDof80</i> | TATA-box    | 1073           | 1078          | core promoter element around -30 of transcription start    |
| <i>CsDof80</i> | TATA-box    | 1074           | 1078          | core promoter element around -30 of transcription start    |
| <i>CsDof80</i> | TATA-box    | 1096           | 1100          | core promoter element around -30 of transcription start    |
| <i>CsDof80</i> | TATA-box    | 1139           | 1144          | core promoter element around -30 of transcription start    |
| <i>CsDof80</i> | TATA-box    | 1140           | 1144          | core promoter element around -30 of transcription start    |



| Name           | Cis-element | Start position | Stop position | Function                                                             |
|----------------|-------------|----------------|---------------|----------------------------------------------------------------------|
| <i>CsDof80</i> | TATA-box    | 1530           | 1536          | core promoter element around -30 of transcription start              |
| <i>CsDof80</i> | TATA-box    | 1531           | 1536          | core promoter element around -30 of transcription start              |
| <i>CsDof80</i> | TATA-box    | 1532           | 1536          | core promoter element around -30 of transcription start              |
| <i>CsDof80</i> | TATA-box    | 1547           | 1551          | core promoter element around -30 of transcription start              |
| <i>CsDof80</i> | TATA-box    | 1573           | 1577          | core promoter element around -30 of transcription start              |
| <i>CsDof80</i> | TATA-box    | 1609           | 1616          | core promoter element around -30 of transcription start              |
| <i>CsDof80</i> | TATA-box    | 1903           | 1911          | core promoter element around -30 of transcription start              |
| <i>CsDof80</i> | TATA-box    | 1906           | 1911          | core promoter element around -30 of transcription start              |
| <i>CsDof80</i> | TATA-box    | 1907           | 1911          | core promoter element around -30 of transcription start              |
| <i>CsDof80</i> | P-box       | 63             | 70            | gibberellin-responsive element                                       |
| <i>CsDof80</i> | GARE-motif  | 113            | 120           | gibberellin-responsive element                                       |
| <i>CsDof80</i> | GT1-motif   | 1211           | 1217          | light responsive element                                             |
| <i>CsDof80</i> | MBS         | 195            | 201           | MYB binding site involved in drought-inducibility                    |
| <i>CsDof80</i> | MRE         | 851            | 858           | MYB binding site involved in light responsiveness                    |
| <i>CsDof81</i> | ABRE        | 153            | 162           | abscisic acid responsiveness                                         |
| <i>CsDof81</i> | ABRE        | 156            | 161           | abscisic acid responsiveness                                         |
| <i>CsDof81</i> | ABRE        | 1187           | 1192          | abscisic acid responsiveness                                         |
| <i>CsDof81</i> | ACE         | 1776           | 1785          | cis-acting element involved in light responsiveness                  |
| <i>CsDof81</i> | TCA-element | 659            | 668           | cis-acting element involved in salicylic acid responsiveness         |
| <i>CsDof81</i> | TCA-element | 1891           | 1900          | cis-acting element involved in salicylic acid responsiveness         |
| <i>CsDof81</i> | ARE         | 1237           | 1243          | cis-acting regulatory element essential for the anaerobic induction  |
| <i>CsDof81</i> | ARE         | 1544           | 1550          | cis-acting regulatory element essential for the anaerobic induction  |
| <i>CsDof81</i> | G-box       | 155            | 161           | cis-acting regulatory element involved in light responsiveness       |
| <i>CsDof81</i> | G-Box       | 1187           | 1193          | cis-acting regulatory element involved in light responsiveness       |
| <i>CsDof81</i> | O2-site     | 633            | 642           | cis-acting regulatory element involved in zein metabolism regulation |
| <i>CsDof81</i> | O2-site     | 664            | 673           | cis-acting regulatory element involved in zein metabolism regulation |
| <i>CsDof81</i> | CAAT-box    | 213            | 218           | common cis-acting element in promoter and enhancer regions           |
| <i>CsDof81</i> | CAAT-box    | 278            | 283           | common cis-acting element in promoter and enhancer regions           |
| <i>CsDof81</i> | CAAT-box    | 290            | 295           | common cis-acting element in promoter and enhancer regions           |
| <i>CsDof81</i> | CAAT-box    | 384            | 389           | common cis-acting element in promoter and enhancer regions           |
| <i>CsDof81</i> | CAAT-box    | 430            | 438           | common cis-acting element in promoter and enhancer regions           |
| <i>CsDof81</i> | CAAT-box    | 431            | 436           | common cis-acting element in promoter and enhancer regions           |
| <i>CsDof81</i> | CAAT-box    | 780            | 785           | common cis-acting element in promoter and enhancer regions           |
| <i>CsDof81</i> | CAAT-box    | 786            | 791           | common cis-acting element in promoter and enhancer regions           |
| <i>CsDof81</i> | CAAT-box    | 855            | 860           | common cis-acting element in promoter and enhancer regions           |
| <i>CsDof81</i> | CAAT-box    | 1008           | 1013          | common cis-acting element in promoter and enhancer regions           |
| <i>CsDof81</i> | CAAT-box    | 1135           | 1140          | common cis-acting element in promoter and enhancer regions           |
| <i>CsDof81</i> | CAAT-box    | 1161           | 1166          | common cis-acting element in promoter and enhancer regions           |
| <i>CsDof81</i> | CAAT-box    | 1182           | 1187          | common cis-acting element in promoter and enhancer regions           |
| <i>CsDof81</i> | CAAT-box    | 1548           | 1553          | common cis-acting element in promoter and enhancer regions           |
| <i>CsDof81</i> | CAAT-box    | 1877           | 1882          | common cis-acting element in promoter and enhancer regions           |
| <i>CsDof81</i> | TATA-box    | 13             | 17            | core promoter element around -30 of transcription start              |
| <i>CsDof81</i> | TATA-box    | 18             | 22            | core promoter element around -30 of transcription start              |
| <i>CsDof81</i> | TATA-box    | 172            | 180           | core promoter element around -30 of transcription start              |
| <i>CsDof81</i> | TATA-box    | 183            | 191           | core promoter element around -30 of transcription start              |
| <i>CsDof81</i> | TATA-box    | 381            | 385           | core promoter element around -30 of transcription start              |
| <i>CsDof81</i> | TATA-box    | 391            | 395           | core promoter element around -30 of transcription start              |
| <i>CsDof81</i> | TATA-box    | 400            | 406           | core promoter element around -30 of transcription start              |
| <i>CsDof81</i> | TATA-box    | 401            | 406           | core promoter element around -30 of transcription start              |
| <i>CsDof81</i> | TATA-box    | 402            | 406           | core promoter element around -30 of transcription start              |
| <i>CsDof81</i> | TATA-box    | 527            | 533           | core promoter element around -30 of transcription start              |

| Name           | Cis-element | Start position | Stop position | Function                                                |
|----------------|-------------|----------------|---------------|---------------------------------------------------------|
| <i>CsDof81</i> | TATA-box    | 528            | 533           | core promoter element around -30 of transcription start |
| <i>CsDof81</i> | TATA-box    | 529            | 533           | core promoter element around -30 of transcription start |
| <i>CsDof81</i> | TATA-box    | 583            | 587           | core promoter element around -30 of transcription start |
| <i>CsDof81</i> | TATA-box    | 839            | 847           | core promoter element around -30 of transcription start |
| <i>CsDof81</i> | TATA-box    | 842            | 847           | core promoter element around -30 of transcription start |
| <i>CsDof81</i> | TATA-box    | 843            | 847           | core promoter element around -30 of transcription start |
| <i>CsDof81</i> | TATA-box    | 850            | 856           | core promoter element around -30 of transcription start |
| <i>CsDof81</i> | TATA-box    | 851            | 856           | core promoter element around -30 of transcription start |
| <i>CsDof81</i> | TATA-box    | 852            | 856           | core promoter element around -30 of transcription start |
| <i>CsDof81</i> | TATA-box    | 888            | 892           | core promoter element around -30 of transcription start |
| <i>CsDof81</i> | TATA-box    | 1012           | 1020          | core promoter element around -30 of transcription start |
| <i>CsDof81</i> | TATA-box    | 1013           | 1020          | core promoter element around -30 of transcription start |
| <i>CsDof81</i> | TATA-box    | 1014           | 1020          | core promoter element around -30 of transcription start |
| <i>CsDof81</i> | TATA-box    | 1015           | 1020          | core promoter element around -30 of transcription start |
| <i>CsDof81</i> | TATA-box    | 1016           | 1020          | core promoter element around -30 of transcription start |
| <i>CsDof81</i> | TATA-box    | 1096           | 1100          | core promoter element around -30 of transcription start |
| <i>CsDof81</i> | TATA-box    | 1103           | 1107          | core promoter element around -30 of transcription start |
| <i>CsDof81</i> | TATA-box    | 1205           | 1209          | core promoter element around -30 of transcription start |
| <i>CsDof81</i> | TATA-box    | 1243           | 1247          | core promoter element around -30 of transcription start |
| <i>CsDof81</i> | TATA-box    | 1266           | 1273          | core promoter element around -30 of transcription start |
| <i>CsDof81</i> | TATA-box    | 1267           | 1273          | core promoter element around -30 of transcription start |
| <i>CsDof81</i> | TATA-box    | 1268           | 1274          | core promoter element around -30 of transcription start |
| <i>CsDof81</i> | TATA-box    | 1269           | 1273          | core promoter element around -30 of transcription start |
| <i>CsDof81</i> | TATA-box    | 1301           | 1307          | core promoter element around -30 of transcription start |
| <i>CsDof81</i> | TATA-box    | 1302           | 1307          | core promoter element around -30 of transcription start |
| <i>CsDof81</i> | TATA-box    | 1303           | 1307          | core promoter element around -30 of transcription start |
| <i>CsDof81</i> | TATA-box    | 1334           | 1341          | core promoter element around -30 of transcription start |
| <i>CsDof81</i> | TATA-box    | 1345           | 1349          | core promoter element around -30 of transcription start |
| <i>CsDof81</i> | TATA-box    | 1551           | 1557          | core promoter element around -30 of transcription start |
| <i>CsDof81</i> | TATA-box    | 1552           | 1556          | core promoter element around -30 of transcription start |
| <i>CsDof81</i> | TATA-box    | 1626           | 1633          | core promoter element around -30 of transcription start |
| <i>CsDof81</i> | TATA-box    | 1627           | 1633          | core promoter element around -30 of transcription start |
| <i>CsDof81</i> | TATA-box    | 1628           | 1633          | core promoter element around -30 of transcription start |
| <i>CsDof81</i> | TATA-box    | 1629           | 1633          | core promoter element around -30 of transcription start |
| <i>CsDof81</i> | TATA-box    | 1636           | 1640          | core promoter element around -30 of transcription start |
| <i>CsDof81</i> | TATA-box    | 1679           | 1683          | core promoter element around -30 of transcription start |
| <i>CsDof81</i> | TATA-box    | 1730           | 1736          | core promoter element around -30 of transcription start |
| <i>CsDof81</i> | TATA-box    | 1731           | 1735          | core promoter element around -30 of transcription start |
| <i>CsDof81</i> | TATA-box    | 1798           | 1805          | core promoter element around -30 of transcription start |
| <i>CsDof81</i> | TATA-box    | 1799           | 1805          | core promoter element around -30 of transcription start |
| <i>CsDof81</i> | TATA-box    | 1800           | 1805          | core promoter element around -30 of transcription start |
| <i>CsDof81</i> | TATA-box    | 1801           | 1805          | core promoter element around -30 of transcription start |
| <i>CsDof81</i> | TATA-box    | 1852           | 1858          | core promoter element around -30 of transcription start |
| <i>CsDof81</i> | TATA-box    | 1853           | 1857          | core promoter element around -30 of transcription start |
| <i>CsDof81</i> | TATA-box    | 1887           | 1894          | core promoter element around -30 of transcription start |
| <i>CsDof81</i> | TATA-box    | 1909           | 1917          | core promoter element around -30 of transcription start |
| <i>CsDof81</i> | TATA-box    | 1912           | 1917          | core promoter element around -30 of transcription start |
| <i>CsDof81</i> | TATA-box    | 1913           | 1917          | core promoter element around -30 of transcription start |
| <i>CsDof81</i> | AAAC-motif  | 1119           | 1130          | light responsive element                                |
| <i>CsDof81</i> | MRE         | 1117           | 1124          | MYB binding site involved in light responsiveness       |
| <i>CsDof82</i> | ABRE        | 1219           | 1224          | abscisic acid responsiveness                            |

| Name           | Cis-element | Start position | Stop position | Function                                                             |
|----------------|-------------|----------------|---------------|----------------------------------------------------------------------|
| <i>CsDof82</i> | TGA-element | 1972           | 1978          | auxin-responsive element                                             |
| <i>CsDof82</i> | ARE         | 211            | 217           | cis-acting regulatory element essential for the anaerobic induction  |
| <i>CsDof82</i> | ARE         | 1030           | 1036          | cis-acting regulatory element essential for the anaerobic induction  |
| <i>CsDof82</i> | ARE         | 1886           | 1892          | cis-acting regulatory element essential for the anaerobic induction  |
| <i>CsDof82</i> | G-box       | 1215           | 1221          | cis-acting regulatory element involved in light responsiveness       |
| <i>CsDof82</i> | G-box       | 1218           | 1224          | cis-acting regulatory element involved in light responsiveness       |
| <i>CsDof82</i> | CGTCA-motif | 1141           | 1146          | cis-acting regulatory element involved in the MeJA-responsiveness    |
| <i>CsDof82</i> | CGTCA-motif | 1368           | 1373          | cis-acting regulatory element involved in the MeJA-responsiveness    |
| <i>CsDof82</i> | CGTCA-motif | 1862           | 1867          | cis-acting regulatory element involved in the MeJA-responsiveness    |
| <i>CsDof82</i> | TGACG-motif | 1141           | 1146          | cis-acting regulatory element involved in the MeJA-responsiveness    |
| <i>CsDof82</i> | TGACG-motif | 1368           | 1373          | cis-acting regulatory element involved in the MeJA-responsiveness    |
| <i>CsDof82</i> | TGACG-motif | 1862           | 1867          | cis-acting regulatory element involved in the MeJA-responsiveness    |
| <i>CsDof82</i> | O2-site     | 114            | 122           | cis-acting regulatory element involved in zein metabolism regulation |
| <i>CsDof82</i> | CAT-box     | 1075           | 1081          | cis-acting regulatory element related to meristem expression         |
| <i>CsDof82</i> | CAAT-box    | 36             | 41            | common cis-acting element in promoter and enhancer regions           |
| <i>CsDof82</i> | CAAT-box    | 115            | 120           | common cis-acting element in promoter and enhancer regions           |
| <i>CsDof82</i> | CAAT-box    | 160            | 165           | common cis-acting element in promoter and enhancer regions           |
| <i>CsDof82</i> | CAAT-box    | 280            | 285           | common cis-acting element in promoter and enhancer regions           |
| <i>CsDof82</i> | CAAT-box    | 456            | 461           | common cis-acting element in promoter and enhancer regions           |
| <i>CsDof82</i> | CAAT-box    | 603            | 608           | common cis-acting element in promoter and enhancer regions           |
| <i>CsDof82</i> | CAAT-box    | 667            | 672           | common cis-acting element in promoter and enhancer regions           |
| <i>CsDof82</i> | CAAT-box    | 864            | 869           | common cis-acting element in promoter and enhancer regions           |
| <i>CsDof82</i> | CAAT-box    | 872            | 877           | common cis-acting element in promoter and enhancer regions           |
| <i>CsDof82</i> | CAAT-box    | 1025           | 1030          | common cis-acting element in promoter and enhancer regions           |
| <i>CsDof82</i> | CAAT-box    | 1058           | 1063          | common cis-acting element in promoter and enhancer regions           |
| <i>CsDof82</i> | CAAT-box    | 1165           | 1170          | common cis-acting element in promoter and enhancer regions           |
| <i>CsDof82</i> | CAAT-box    | 1310           | 1315          | common cis-acting element in promoter and enhancer regions           |
| <i>CsDof82</i> | CAAT-box    | 1403           | 1408          | common cis-acting element in promoter and enhancer regions           |
| <i>CsDof82</i> | CAAT-box    | 1418           | 1423          | common cis-acting element in promoter and enhancer regions           |
| <i>CsDof82</i> | CAAT-box    | 1427           | 1432          | common cis-acting element in promoter and enhancer regions           |
| <i>CsDof82</i> | CAAT-box    | 1437           | 1442          | common cis-acting element in promoter and enhancer regions           |
| <i>CsDof82</i> | CAAT-box    | 1501           | 1506          | common cis-acting element in promoter and enhancer regions           |
| <i>CsDof82</i> | CAAT-box    | 1593           | 1598          | common cis-acting element in promoter and enhancer regions           |
| <i>CsDof82</i> | CAAT-box    | 1738           | 1743          | common cis-acting element in promoter and enhancer regions           |
| <i>CsDof82</i> | CAAT-box    | 1780           | 1785          | common cis-acting element in promoter and enhancer regions           |
| <i>CsDof82</i> | TATA-box    | 97             | 103           | core promoter element around -30 of transcription start              |
| <i>CsDof82</i> | TATA-box    | 99             | 103           | core promoter element around -30 of transcription start              |
| <i>CsDof82</i> | TATA-box    | 133            | 139           | core promoter element around -30 of transcription start              |
| <i>CsDof82</i> | TATA-box    | 135            | 139           | core promoter element around -30 of transcription start              |
| <i>CsDof82</i> | TATA-box    | 256            | 260           | core promoter element around -30 of transcription start              |
| <i>CsDof82</i> | TATA-box    | 417            | 423           | core promoter element around -30 of transcription start              |
| <i>CsDof82</i> | TATA-box    | 418            | 424           | core promoter element around -30 of transcription start              |
| <i>CsDof82</i> | TATA-box    | 419            | 423           | core promoter element around -30 of transcription start              |
| <i>CsDof82</i> | TATA-box    | 533            | 542           | core promoter element around -30 of transcription start              |
| <i>CsDof82</i> | TATA-box    | 534            | 540           | core promoter element around -30 of transcription start              |
| <i>CsDof82</i> | TATA-box    | 535            | 539           | core promoter element around -30 of transcription start              |
| <i>CsDof82</i> | TATA-box    | 688            | 692           | core promoter element around -30 of transcription start              |
| <i>CsDof82</i> | TATA-box    | 723            | 728           | core promoter element around -30 of transcription start              |
| <i>CsDof82</i> | TATA-box    | 724            | 728           | core promoter element around -30 of transcription start              |
| <i>CsDof82</i> | TATA-box    | 839            | 843           | core promoter element around -30 of transcription start              |
| <i>CsDof82</i> | TATA-box    | 850            | 856           | core promoter element around -30 of transcription start              |

| Name           | Cis-element | Start position | Stop position | Function                                                             |
|----------------|-------------|----------------|---------------|----------------------------------------------------------------------|
| <i>CsDof82</i> | TATA-box    | 851            | 855           | core promoter element around -30 of transcription start              |
| <i>CsDof82</i> | TATA-box    | 961            | 965           | core promoter element around -30 of transcription start              |
| <i>CsDof82</i> | TATA-box    | 1332           | 1336          | core promoter element around -30 of transcription start              |
| <i>CsDof82</i> | TATA-box    | 1336           | 1343          | core promoter element around -30 of transcription start              |
| <i>CsDof82</i> | TATA-box    | 1337           | 1343          | core promoter element around -30 of transcription start              |
| <i>CsDof82</i> | TATA-box    | 1338           | 1343          | core promoter element around -30 of transcription start              |
| <i>CsDof82</i> | TATA-box    | 1339           | 1343          | core promoter element around -30 of transcription start              |
| <i>CsDof82</i> | TATA-box    | 1362           | 1368          | core promoter element around -30 of transcription start              |
| <i>CsDof82</i> | TATA-box    | 1363           | 1368          | core promoter element around -30 of transcription start              |
| <i>CsDof82</i> | TATA-box    | 1364           | 1368          | core promoter element around -30 of transcription start              |
| <i>CsDof82</i> | TATA-box    | 1397           | 1403          | core promoter element around -30 of transcription start              |
| <i>CsDof82</i> | TATA-box    | 1398           | 1403          | core promoter element around -30 of transcription start              |
| <i>CsDof82</i> | TATA-box    | 1399           | 1403          | core promoter element around -30 of transcription start              |
| <i>CsDof82</i> | TATA-box    | 1464           | 1470          | core promoter element around -30 of transcription start              |
| <i>CsDof82</i> | TATA-box    | 1465           | 1470          | core promoter element around -30 of transcription start              |
| <i>CsDof82</i> | TATA-box    | 1466           | 1470          | core promoter element around -30 of transcription start              |
| <i>CsDof82</i> | TATA-box    | 1544           | 1552          | core promoter element around -30 of transcription start              |
| <i>CsDof82</i> | TATA-box    | 1550           | 1554          | core promoter element around -30 of transcription start              |
| <i>CsDof82</i> | TATA-box    | 1600           | 1604          | core promoter element around -30 of transcription start              |
| <i>CsDof82</i> | TATA-box    | 1619           | 1624          | core promoter element around -30 of transcription start              |
| <i>CsDof82</i> | TATA-box    | 1620           | 1624          | core promoter element around -30 of transcription start              |
| <i>CsDof82</i> | TATA-box    | 1658           | 1662          | core promoter element around -30 of transcription start              |
| <i>CsDof82</i> | TATA-box    | 1741           | 1747          | core promoter element around -30 of transcription start              |
| <i>CsDof82</i> | TATA-box    | 1742           | 1747          | core promoter element around -30 of transcription start              |
| <i>CsDof82</i> | TATA-box    | 1743           | 1747          | core promoter element around -30 of transcription start              |
| <i>CsDof82</i> | TATA-box    | 1821           | 1830          | core promoter element around -30 of transcription start              |
| <i>CsDof82</i> | TATA-box    | 1822           | 1828          | core promoter element around -30 of transcription start              |
| <i>CsDof82</i> | TATA-box    | 1823           | 1827          | core promoter element around -30 of transcription start              |
| <i>CsDof82</i> | TATA-box    | 1836           | 1840          | core promoter element around -30 of transcription start              |
| <i>CsDof82</i> | TATA-box    | 1879           | 1885          | core promoter element around -30 of transcription start              |
| <i>CsDof82</i> | TATA-box    | 1880           | 1886          | core promoter element around -30 of transcription start              |
| <i>CsDof82</i> | TATA-box    | 1881           | 1885          | core promoter element around -30 of transcription start              |
| <i>CsDof82</i> | TATA-box    | 1958           | 1964          | core promoter element around -30 of transcription start              |
| <i>CsDof82</i> | TATA-box    | 1959           | 1964          | core promoter element around -30 of transcription start              |
| <i>CsDof82</i> | TATA-box    | 1960           | 1964          | core promoter element around -30 of transcription start              |
| <i>CsDof82</i> | HD-Zip 1    | 281            | 289           | element involved in differentiation of the palisade mesophyll cells  |
| <i>CsDof82</i> | GARE-motif  | 524            | 531           | gibberellin-responsive element                                       |
| <i>CsDof82</i> | GT1-motif   | 441            | 447           | light responsive element                                             |
| <i>CsDof82</i> | GT1-motif   | 740            | 746           | light responsive element                                             |
| <i>CsDof82</i> | MBS         | 237            | 243           | MYB binding site involved in drought-inducibility                    |
| <i>CsDof82</i> | MBS         | 1121           | 1127          | MYB binding site involved in drought-inducibility                    |
| <i>CsDof82</i> | MBS         | 1849           | 1855          | MYB binding site involved in drought-inducibility                    |
| <i>CsDof83</i> | LTR         | 895            | 901           | cis-acting element involved in low-temperature responsiveness        |
| <i>CsDof83</i> | LTR         | 1048           | 1054          | cis-acting element involved in low-temperature responsiveness        |
| <i>CsDof83</i> | TCA-element | 1913           | 1922          | cis-acting element involved in salicylic acid responsiveness         |
| <i>CsDof83</i> | ARE         | 273            | 279           | cis-acting regulatory element essential for the anaerobic induction  |
| <i>CsDof83</i> | TGACG-motif | 50             | 55            | cis-acting regulatory element involved in the MeJA-responsiveness    |
| <i>CsDof83</i> | TGACG-motif | 757            | 762           | cis-acting regulatory element involved in the MeJA-responsiveness    |
| <i>CsDof83</i> | CGTCA-motif | 50             | 55            | cis-acting regulatory element involved in the MeJA-responsiveness    |
| <i>CsDof83</i> | CGTCA-motif | 757            | 762           | cis-acting regulatory element involved in the MeJA-responsiveness    |
| <i>CsDof83</i> | O2-site     | 47             | 56            | cis-acting regulatory element involved in zein metabolism regulation |

| Name           | Cis-element | Start position | Stop position | Function                                                   |
|----------------|-------------|----------------|---------------|------------------------------------------------------------|
| <i>CsDof83</i> | CAAT-box    | 103            | 108           | common cis-acting element in promoter and enhancer regions |
| <i>CsDof83</i> | CAAT-box    | 451            | 456           | common cis-acting element in promoter and enhancer regions |
| <i>CsDof83</i> | CAAT-box    | 646            | 651           | common cis-acting element in promoter and enhancer regions |
| <i>CsDof83</i> | CAAT-box    | 1079           | 1084          | common cis-acting element in promoter and enhancer regions |
| <i>CsDof83</i> | CAAT-box    | 1183           | 1188          | common cis-acting element in promoter and enhancer regions |
| <i>CsDof83</i> | CAAT-box    | 1241           | 1246          | common cis-acting element in promoter and enhancer regions |
| <i>CsDof83</i> | CAAT-box    | 1392           | 1397          | common cis-acting element in promoter and enhancer regions |
| <i>CsDof83</i> | CAAT-box    | 1443           | 1448          | common cis-acting element in promoter and enhancer regions |
| <i>CsDof83</i> | CAAT-box    | 1506           | 1511          | common cis-acting element in promoter and enhancer regions |
| <i>CsDof83</i> | CAAT-box    | 1635           | 1640          | common cis-acting element in promoter and enhancer regions |
| <i>CsDof83</i> | CAAT-box    | 1709           | 1714          | common cis-acting element in promoter and enhancer regions |
| <i>CsDof83</i> | CAAT-box    | 1833           | 1838          | common cis-acting element in promoter and enhancer regions |
| <i>CsDof83</i> | CAAT-box    | 1900           | 1905          | common cis-acting element in promoter and enhancer regions |
| <i>CsDof83</i> | TATA-box    | 14             | 19            | core promoter element around -30 of transcription start    |
| <i>CsDof83</i> | TATA-box    | 15             | 19            | core promoter element around -30 of transcription start    |
| <i>CsDof83</i> | TATA-box    | 135            | 142           | core promoter element around -30 of transcription start    |
| <i>CsDof83</i> | TATA-box    | 136            | 142           | core promoter element around -30 of transcription start    |
| <i>CsDof83</i> | TATA-box    | 137            | 142           | core promoter element around -30 of transcription start    |
| <i>CsDof83</i> | TATA-box    | 138            | 142           | core promoter element around -30 of transcription start    |
| <i>CsDof83</i> | TATA-box    | 181            | 189           | core promoter element around -30 of transcription start    |
| <i>CsDof83</i> | TATA-box    | 188            | 194           | core promoter element around -30 of transcription start    |
| <i>CsDof83</i> | TATA-box    | 189            | 194           | core promoter element around -30 of transcription start    |
| <i>CsDof83</i> | TATA-box    | 190            | 194           | core promoter element around -30 of transcription start    |
| <i>CsDof83</i> | TATA-box    | 218            | 225           | core promoter element around -30 of transcription start    |
| <i>CsDof83</i> | TATA-box    | 219            | 225           | core promoter element around -30 of transcription start    |
| <i>CsDof83</i> | TATA-box    | 220            | 227           | core promoter element around -30 of transcription start    |
| <i>CsDof83</i> | TATA-box    | 221            | 227           | core promoter element around -30 of transcription start    |
| <i>CsDof83</i> | TATA-box    | 222            | 228           | core promoter element around -30 of transcription start    |
| <i>CsDof83</i> | TATA-box    | 223            | 227           | core promoter element around -30 of transcription start    |
| <i>CsDof83</i> | TATA-box    | 318            | 325           | core promoter element around -30 of transcription start    |
| <i>CsDof83</i> | TATA-box    | 634            | 641           | core promoter element around -30 of transcription start    |
| <i>CsDof83</i> | TATA-box    | 635            | 641           | core promoter element around -30 of transcription start    |
| <i>CsDof83</i> | TATA-box    | 636            | 641           | core promoter element around -30 of transcription start    |
| <i>CsDof83</i> | TATA-box    | 637            | 641           | core promoter element around -30 of transcription start    |
| <i>CsDof83</i> | TATA-box    | 699            | 706           | core promoter element around -30 of transcription start    |
| <i>CsDof83</i> | TATA-box    | 709            | 713           | core promoter element around -30 of transcription start    |
| <i>CsDof83</i> | TATA-box    | 1207           | 1211          | core promoter element around -30 of transcription start    |
| <i>CsDof83</i> | TATA-box    | 1268           | 1274          | core promoter element around -30 of transcription start    |
| <i>CsDof83</i> | TATA-box    | 1269           | 1273          | core promoter element around -30 of transcription start    |
| <i>CsDof83</i> | TATA-box    | 1342           | 1348          | core promoter element around -30 of transcription start    |
| <i>CsDof83</i> | TATA-box    | 1343           | 1347          | core promoter element around -30 of transcription start    |
| <i>CsDof83</i> | TATA-box    | 1412           | 1417          | core promoter element around -30 of transcription start    |
| <i>CsDof83</i> | TATA-box    | 1413           | 1417          | core promoter element around -30 of transcription start    |
| <i>CsDof83</i> | TATA-box    | 1433           | 1441          | core promoter element around -30 of transcription start    |
| <i>CsDof83</i> | TATA-box    | 1450           | 1457          | core promoter element around -30 of transcription start    |
| <i>CsDof83</i> | TATA-box    | 1515           | 1522          | core promoter element around -30 of transcription start    |
| <i>CsDof83</i> | TATA-box    | 1516           | 1522          | core promoter element around -30 of transcription start    |
| <i>CsDof83</i> | TATA-box    | 1517           | 1523          | core promoter element around -30 of transcription start    |
| <i>CsDof83</i> | TATA-box    | 1518           | 1522          | core promoter element around -30 of transcription start    |
| <i>CsDof83</i> | TATA-box    | 1559           | 1563          | core promoter element around -30 of transcription start    |
| <i>CsDof83</i> | TATA-box    | 1865           | 1871          | core promoter element around -30 of transcription start    |

| Name           | Cis-element     | Start position | Stop position | Function                                                            |
|----------------|-----------------|----------------|---------------|---------------------------------------------------------------------|
| <i>CsDof83</i> | TATA-box        | 1867           | 1871          | core promoter element around -30 of transcription start             |
| <i>CsDof83</i> | TATA-box        | 1920           | 1929          | core promoter element around -30 of transcription start             |
| <i>CsDof83</i> | GARE-motif      | 1282           | 1289          | gibberellin-responsive element                                      |
| <i>CsDof83</i> | GARE-motif      | 1290           | 1297          | gibberellin-responsive element                                      |
| <i>CsDof83</i> | WUN-motif       | 108            | 117           | wound-responsive element                                            |
| <i>CsDof84</i> | ABRE            | 186            | 191           | abscisic acid responsiveness                                        |
| <i>CsDof84</i> | ABRE            | 410            | 416           | abscisic acid responsiveness                                        |
| <i>CsDof84</i> | ABRE            | 411            | 416           | abscisic acid responsiveness                                        |
| <i>CsDof84</i> | ABRE            | 847            | 852           | abscisic acid responsiveness                                        |
| <i>CsDof84</i> | ABRE            | 1109           | 1114          | abscisic acid responsiveness                                        |
| <i>CsDof84</i> | TGA-element     | 1802           | 1808          | auxin-responsive element                                            |
| <i>CsDof84</i> | AT-rich element | 1309           | 1319          | binding site of AT-rich DNA binding protein (ATBP-1)                |
| <i>CsDof84</i> | TCA-element     | 712            | 721           | cis-acting element involved in salicylic acid responsiveness        |
| <i>CsDof84</i> | A-box           | 321            | 327           | cis-acting regulatory element                                       |
| <i>CsDof84</i> | A-box           | 509            | 515           | cis-acting regulatory element                                       |
| <i>CsDof84</i> | ARE             | 741            | 747           | cis-acting regulatory element essential for the anaerobic induction |
| <i>CsDof84</i> | ARE             | 1162           | 1168          | cis-acting regulatory element essential for the anaerobic induction |
| <i>CsDof84</i> | ARE             | 1366           | 1372          | cis-acting regulatory element essential for the anaerobic induction |
| <i>CsDof84</i> | G-Box           | 186            | 192           | cis-acting regulatory element involved in light responsiveness      |
| <i>CsDof84</i> | G-Box           | 410            | 416           | cis-acting regulatory element involved in light responsiveness      |
| <i>CsDof84</i> | G-box           | 410            | 416           | cis-acting regulatory element involved in light responsiveness      |
| <i>CsDof84</i> | G-box           | 846            | 852           | cis-acting regulatory element involved in light responsiveness      |
| <i>CsDof84</i> | G-box           | 1108           | 1114          | cis-acting regulatory element involved in light responsiveness      |
| <i>CsDof84</i> | CGTCA-motif     | 365            | 370           | cis-acting regulatory element involved in the MeJA-responsiveness   |
| <i>CsDof84</i> | CGTCA-motif     | 922            | 927           | cis-acting regulatory element involved in the MeJA-responsiveness   |
| <i>CsDof84</i> | CGTCA-motif     | 946            | 951           | cis-acting regulatory element involved in the MeJA-responsiveness   |
| <i>CsDof84</i> | TGACG-motif     | 365            | 370           | cis-acting regulatory element involved in the MeJA-responsiveness   |
| <i>CsDof84</i> | TGACG-motif     | 922            | 927           | cis-acting regulatory element involved in the MeJA-responsiveness   |
| <i>CsDof84</i> | TGACG-motif     | 946            | 951           | cis-acting regulatory element involved in the MeJA-responsiveness   |
| <i>CsDof84</i> | CAAT-box        | 131            | 136           | common cis-acting element in promoter and enhancer regions          |
| <i>CsDof84</i> | CAAT-box        | 211            | 216           | common cis-acting element in promoter and enhancer regions          |
| <i>CsDof84</i> | CAAT-box        | 265            | 270           | common cis-acting element in promoter and enhancer regions          |
| <i>CsDof84</i> | CAAT-box        | 273            | 278           | common cis-acting element in promoter and enhancer regions          |
| <i>CsDof84</i> | CAAT-box        | 346            | 351           | common cis-acting element in promoter and enhancer regions          |
| <i>CsDof84</i> | CAAT-box        | 441            | 446           | common cis-acting element in promoter and enhancer regions          |
| <i>CsDof84</i> | CAAT-box        | 529            | 534           | common cis-acting element in promoter and enhancer regions          |
| <i>CsDof84</i> | CAAT-box        | 550            | 555           | common cis-acting element in promoter and enhancer regions          |
| <i>CsDof84</i> | CAAT-box        | 630            | 635           | common cis-acting element in promoter and enhancer regions          |
| <i>CsDof84</i> | CAAT-box        | 771            | 776           | common cis-acting element in promoter and enhancer regions          |
| <i>CsDof84</i> | CAAT-box        | 819            | 824           | common cis-acting element in promoter and enhancer regions          |
| <i>CsDof84</i> | CAAT-box        | 1050           | 1055          | common cis-acting element in promoter and enhancer regions          |
| <i>CsDof84</i> | CAAT-box        | 1076           | 1081          | common cis-acting element in promoter and enhancer regions          |
| <i>CsDof84</i> | CAAT-box        | 1094           | 1099          | common cis-acting element in promoter and enhancer regions          |
| <i>CsDof84</i> | CAAT-box        | 1303           | 1308          | common cis-acting element in promoter and enhancer regions          |
| <i>CsDof84</i> | CAAT-box        | 1339           | 1344          | common cis-acting element in promoter and enhancer regions          |
| <i>CsDof84</i> | CAAT-box        | 1396           | 1401          | common cis-acting element in promoter and enhancer regions          |
| <i>CsDof84</i> | CAAT-box        | 1427           | 1432          | common cis-acting element in promoter and enhancer regions          |
| <i>CsDof84</i> | CAAT-box        | 1482           | 1487          | common cis-acting element in promoter and enhancer regions          |
| <i>CsDof84</i> | CAAT-box        | 1872           | 1877          | common cis-acting element in promoter and enhancer regions          |
| <i>CsDof84</i> | CAAT-box        | 1947           | 1952          | common cis-acting element in promoter and enhancer regions          |
| <i>CsDof84</i> | TATA-box        | 18             | 24            | core promoter element around -30 of transcription start             |



| Name           | Cis-element        | Start position | Stop position | Function                                                            |
|----------------|--------------------|----------------|---------------|---------------------------------------------------------------------|
| <i>CsDof84</i> | TATA-box           | 19             | 24            | core promoter element around -30 of transcription start             |
| <i>CsDof84</i> | TATA-box           | 20             | 24            | core promoter element around -30 of transcription start             |
| <i>CsDof84</i> | TATA-box           | 98             | 106           | core promoter element around -30 of transcription start             |
| <i>CsDof84</i> | TATA-box           | 102            | 110           | core promoter element around -30 of transcription start             |
| <i>CsDof84</i> | TATA-box           | 115            | 119           | core promoter element around -30 of transcription start             |
| <i>CsDof84</i> | TATA-box           | 164            | 168           | core promoter element around -30 of transcription start             |
| <i>CsDof84</i> | TATA-box           | 695            | 702           | core promoter element around -30 of transcription start             |
| <i>CsDof84</i> | TATA-box           | 696            | 702           | core promoter element around -30 of transcription start             |
| <i>CsDof84</i> | TATA-box           | 697            | 704           | core promoter element around -30 of transcription start             |
| <i>CsDof84</i> | TATA-box           | 698            | 704           | core promoter element around -30 of transcription start             |
| <i>CsDof84</i> | TATA-box           | 699            | 705           | core promoter element around -30 of transcription start             |
| <i>CsDof84</i> | TATA-box           | 700            | 704           | core promoter element around -30 of transcription start             |
| <i>CsDof84</i> | TATA-box           | 780            | 786           | core promoter element around -30 of transcription start             |
| <i>CsDof84</i> | TATA-box           | 782            | 786           | core promoter element around -30 of transcription start             |
| <i>CsDof84</i> | TATA-box           | 1004           | 1010          | core promoter element around -30 of transcription start             |
| <i>CsDof84</i> | TATA-box           | 1005           | 1012          | core promoter element around -30 of transcription start             |
| <i>CsDof84</i> | TATA-box           | 1006           | 1012          | core promoter element around -30 of transcription start             |
| <i>CsDof84</i> | TATA-box           | 1007           | 1013          | core promoter element around -30 of transcription start             |
| <i>CsDof84</i> | TATA-box           | 1008           | 1012          | core promoter element around -30 of transcription start             |
| <i>CsDof84</i> | TATA-box           | 1211           | 1215          | core promoter element around -30 of transcription start             |
| <i>CsDof84</i> | TATA-box           | 1538           | 1544          | core promoter element around -30 of transcription start             |
| <i>CsDof84</i> | TATA-box           | 1539           | 1543          | core promoter element around -30 of transcription start             |
| <i>CsDof84</i> | TATA-box           | 1646           | 1653          | core promoter element around -30 of transcription start             |
| <i>CsDof84</i> | TATA-box           | 1684           | 1692          | core promoter element around -30 of transcription start             |
| <i>CsDof84</i> | TATA-box           | 1760           | 1764          | core promoter element around -30 of transcription start             |
| <i>CsDof84</i> | 3-AF1 binding site | 44             | 54            | light responsive element                                            |
| <i>CsDof84</i> | GT1-motif          | 1288           | 1294          | light responsive element                                            |
| <i>CsDof84</i> | GT1-motif          | 1448           | 1454          | light responsive element                                            |
| <i>CsDof84</i> | GT1-motif          | 1814           | 1820          | light responsive element                                            |
| <i>CsDof84</i> | Sp1                | 890            | 896           | light responsive element                                            |
| <i>CsDof84</i> | MRE                | 961            | 968           | MYB binding site involved in light responsiveness                   |
| <i>CsDof85</i> | ARE                | 83             | 89            | cis-acting regulatory element essential for the anaerobic induction |
| <i>CsDof85</i> | ARE                | 801            | 807           | cis-acting regulatory element essential for the anaerobic induction |
| <i>CsDof85</i> | ARE                | 1204           | 1210          | cis-acting regulatory element essential for the anaerobic induction |
| <i>CsDof85</i> | ARE                | 1486           | 1492          | cis-acting regulatory element essential for the anaerobic induction |
| <i>CsDof85</i> | circadian          | 559            | 568           | cis-acting regulatory element involved in circadian control         |
| <i>CsDof85</i> | G-box              | 47             | 53            | cis-acting regulatory element involved in light responsiveness      |
| <i>CsDof85</i> | CGTCA-motif        | 592            | 597           | cis-acting regulatory element involved in the MeJA-responsiveness   |
| <i>CsDof85</i> | TGACG-motif        | 592            | 597           | cis-acting regulatory element involved in the MeJA-responsiveness   |
| <i>CsDof85</i> | CAAT-box           | 95             | 100           | common cis-acting element in promoter and enhancer regions          |
| <i>CsDof85</i> | CAAT-box           | 163            | 168           | common cis-acting element in promoter and enhancer regions          |
| <i>CsDof85</i> | CAAT-box           | 274            | 279           | common cis-acting element in promoter and enhancer regions          |
| <i>CsDof85</i> | CAAT-box           | 347            | 352           | common cis-acting element in promoter and enhancer regions          |
| <i>CsDof85</i> | CAAT-box           | 753            | 758           | common cis-acting element in promoter and enhancer regions          |
| <i>CsDof85</i> | CAAT-box           | 832            | 837           | common cis-acting element in promoter and enhancer regions          |
| <i>CsDof85</i> | CAAT-box           | 860            | 865           | common cis-acting element in promoter and enhancer regions          |
| <i>CsDof85</i> | CAAT-box           | 905            | 910           | common cis-acting element in promoter and enhancer regions          |
| <i>CsDof85</i> | CAAT-box           | 1550           | 1555          | common cis-acting element in promoter and enhancer regions          |
| <i>CsDof85</i> | CAAT-box           | 1698           | 1703          | common cis-acting element in promoter and enhancer regions          |
| <i>CsDof85</i> | CAAT-box           | 1805           | 1810          | common cis-acting element in promoter and enhancer regions          |
| <i>CsDof85</i> | TATA-box           | 8              | 15            | core promoter element around -30 of transcription start             |





| Name           | Cis-element | Start position | Stop position | Function                                                            |
|----------------|-------------|----------------|---------------|---------------------------------------------------------------------|
| <i>CsDof85</i> | TATA-box    | 1833           | 1837          | core promoter element around -30 of transcription start             |
| <i>CsDof85</i> | TATA-box    | 1838           | 1844          | core promoter element around -30 of transcription start             |
| <i>CsDof85</i> | TATA-box    | 1839           | 1845          | core promoter element around -30 of transcription start             |
| <i>CsDof85</i> | TATA-box    | 1840           | 1846          | core promoter element around -30 of transcription start             |
| <i>CsDof85</i> | TATA-box    | 1841           | 1847          | core promoter element around -30 of transcription start             |
| <i>CsDof85</i> | TATA-box    | 1842           | 1848          | core promoter element around -30 of transcription start             |
| <i>CsDof85</i> | TATA-box    | 1843           | 1849          | core promoter element around -30 of transcription start             |
| <i>CsDof85</i> | TATA-box    | 1844           | 1850          | core promoter element around -30 of transcription start             |
| <i>CsDof85</i> | TATA-box    | 1845           | 1851          | core promoter element around -30 of transcription start             |
| <i>CsDof85</i> | TATA-box    | 1847           | 1851          | core promoter element around -30 of transcription start             |
| <i>CsDof85</i> | TATA-box    | 1853           | 1859          | core promoter element around -30 of transcription start             |
| <i>CsDof85</i> | TATA-box    | 1855           | 1859          | core promoter element around -30 of transcription start             |
| <i>CsDof85</i> | TATA-box    | 1875           | 1879          | core promoter element around -30 of transcription start             |
| <i>CsDof85</i> | TATA-box    | 1939           | 1943          | core promoter element around -30 of transcription start             |
| <i>CsDof85</i> | P-box       | 1042           | 1049          | gibberellin-responsive element                                      |
| <i>CsDof85</i> | P-box       | 1710           | 1717          | gibberellin-responsive element                                      |
| <i>CsDof85</i> | P-box       | 1817           | 1824          | gibberellin-responsive element                                      |
| <i>CsDof85</i> | Sp1         | 636            | 642           | light responsive element                                            |
| <i>CsDof85</i> | GT1-motif   | 1813           | 1819          | light responsive element                                            |
| <i>CsDof85</i> | MRE         | 518            | 525           | MYB binding site involved in light responsiveness                   |
| <i>CsDof86</i> | ABRE        | 1495           | 1500          | abscisic acid responsiveness                                        |
| <i>CsDof86</i> | ABRE        | 1588           | 1593          | abscisic acid responsiveness                                        |
| <i>CsDof86</i> | ABRE        | 1750           | 1755          | abscisic acid responsiveness                                        |
| <i>CsDof86</i> | MSA-like    | 36             | 45            | cis-acting element involved in cell cycle regulation                |
| <i>CsDof86</i> | ARE         | 1637           | 1643          | cis-acting regulatory element essential for the anaerobic induction |
| <i>CsDof86</i> | G-Box       | 1495           | 1501          | cis-acting regulatory element involved in light responsiveness      |
| <i>CsDof86</i> | G-Box       | 1587           | 1593          | cis-acting regulatory element involved in light responsiveness      |
| <i>CsDof86</i> | G-box       | 1749           | 1755          | cis-acting regulatory element involved in light responsiveness      |
| <i>CsDof86</i> | CGTCA-motif | 1157           | 1162          | cis-acting regulatory element involved in the MeJA-responsiveness   |
| <i>CsDof86</i> | TGACG-motif | 1157           | 1162          | cis-acting regulatory element involved in the MeJA-responsiveness   |
| <i>CsDof86</i> | CAAT-box    | 276            | 281           | common cis-acting element in promoter and enhancer regions          |
| <i>CsDof86</i> | CAAT-box    | 319            | 324           | common cis-acting element in promoter and enhancer regions          |
| <i>CsDof86</i> | CAAT-box    | 545            | 550           | common cis-acting element in promoter and enhancer regions          |
| <i>CsDof86</i> | CAAT-box    | 597            | 602           | common cis-acting element in promoter and enhancer regions          |
| <i>CsDof86</i> | CAAT-box    | 936            | 941           | common cis-acting element in promoter and enhancer regions          |
| <i>CsDof86</i> | CAAT-box    | 999            | 1004          | common cis-acting element in promoter and enhancer regions          |
| <i>CsDof86</i> | CAAT-box    | 1285           | 1290          | common cis-acting element in promoter and enhancer regions          |
| <i>CsDof86</i> | CAAT-box    | 1339           | 1344          | common cis-acting element in promoter and enhancer regions          |
| <i>CsDof86</i> | CAAT-box    | 1371           | 1376          | common cis-acting element in promoter and enhancer regions          |
| <i>CsDof86</i> | CAAT-box    | 1465           | 1470          | common cis-acting element in promoter and enhancer regions          |
| <i>CsDof86</i> | CAAT-box    | 1664           | 1669          | common cis-acting element in promoter and enhancer regions          |
| <i>CsDof86</i> | CAAT-box    | 1687           | 1692          | common cis-acting element in promoter and enhancer regions          |
| <i>CsDof86</i> | CAAT-box    | 1900           | 1905          | common cis-acting element in promoter and enhancer regions          |
| <i>CsDof86</i> | TATA-box    | 51             | 57            | core promoter element around -30 of transcription start             |
| <i>CsDof86</i> | TATA-box    | 52             | 57            | core promoter element around -30 of transcription start             |
| <i>CsDof86</i> | TATA-box    | 53             | 57            | core promoter element around -30 of transcription start             |
| <i>CsDof86</i> | TATA-box    | 76             | 82            | core promoter element around -30 of transcription start             |
| <i>CsDof86</i> | TATA-box    | 78             | 82            | core promoter element around -30 of transcription start             |
| <i>CsDof86</i> | TATA-box    | 97             | 101           | core promoter element around -30 of transcription start             |
| <i>CsDof86</i> | TATA-box    | 142            | 148           | core promoter element around -30 of transcription start             |
| <i>CsDof86</i> | TATA-box    | 143            | 149           | core promoter element around -30 of transcription start             |

| <b>Name</b>    | <b>Cis-element</b> | <b>Start position</b> | <b>Stop position</b> | <b>Function</b>                                         |
|----------------|--------------------|-----------------------|----------------------|---------------------------------------------------------|
| <i>CsDof86</i> | TATA-box           | 144                   | 150                  | core promoter element around -30 of transcription start |
| <i>CsDof86</i> | TATA-box           | 145                   | 149                  | core promoter element around -30 of transcription start |
| <i>CsDof86</i> | TATA-box           | 315                   | 321                  | core promoter element around -30 of transcription start |
| <i>CsDof86</i> | TATA-box           | 316                   | 320                  | core promoter element around -30 of transcription start |
| <i>CsDof86</i> | TATA-box           | 330                   | 336                  | core promoter element around -30 of transcription start |
| <i>CsDof86</i> | TATA-box           | 331                   | 336                  | core promoter element around -30 of transcription start |
| <i>CsDof86</i> | TATA-box           | 332                   | 336                  | core promoter element around -30 of transcription start |
| <i>CsDof86</i> | TATA-box           | 379                   | 385                  | core promoter element around -30 of transcription start |
| <i>CsDof86</i> | TATA-box           | 381                   | 385                  | core promoter element around -30 of transcription start |
| <i>CsDof86</i> | TATA-box           | 428                   | 432                  | core promoter element around -30 of transcription start |
| <i>CsDof86</i> | TATA-box           | 627                   | 633                  | core promoter element around -30 of transcription start |
| <i>CsDof86</i> | TATA-box           | 628                   | 632                  | core promoter element around -30 of transcription start |
| <i>CsDof86</i> | TATA-box           | 652                   | 658                  | core promoter element around -30 of transcription start |
| <i>CsDof86</i> | TATA-box           | 653                   | 657                  | core promoter element around -30 of transcription start |
| <i>CsDof86</i> | TATA-box           | 725                   | 731                  | core promoter element around -30 of transcription start |
| <i>CsDof86</i> | TATA-box           | 726                   | 732                  | core promoter element around -30 of transcription start |
| <i>CsDof86</i> | TATA-box           | 728                   | 732                  | core promoter element around -30 of transcription start |
| <i>CsDof86</i> | TATA-box           | 814                   | 821                  | core promoter element around -30 of transcription start |
| <i>CsDof86</i> | TATA-box           | 815                   | 821                  | core promoter element around -30 of transcription start |
| <i>CsDof86</i> | TATA-box           | 816                   | 821                  | core promoter element around -30 of transcription start |
| <i>CsDof86</i> | TATA-box           | 817                   | 821                  | core promoter element around -30 of transcription start |
| <i>CsDof86</i> | TATA-box           | 909                   | 915                  | core promoter element around -30 of transcription start |
| <i>CsDof86</i> | TATA-box           | 910                   | 922                  | core promoter element around -30 of transcription start |
| <i>CsDof86</i> | TATA-box           | 914                   | 920                  | core promoter element around -30 of transcription start |
| <i>CsDof86</i> | TATA-box           | 916                   | 920                  | core promoter element around -30 of transcription start |
| <i>CsDof86</i> | TATA-box           | 1025                  | 1032                 | core promoter element around -30 of transcription start |
| <i>CsDof86</i> | TATA-box           | 1078                  | 1084                 | core promoter element around -30 of transcription start |
| <i>CsDof86</i> | TATA-box           | 1079                  | 1083                 | core promoter element around -30 of transcription start |
| <i>CsDof86</i> | TATA-box           | 1135                  | 1141                 | core promoter element around -30 of transcription start |
| <i>CsDof86</i> | TATA-box           | 1136                  | 1142                 | core promoter element around -30 of transcription start |
| <i>CsDof86</i> | TATA-box           | 1137                  | 1143                 | core promoter element around -30 of transcription start |
| <i>CsDof86</i> | TATA-box           | 1138                  | 1144                 | core promoter element around -30 of transcription start |
| <i>CsDof86</i> | TATA-box           | 1139                  | 1145                 | core promoter element around -30 of transcription start |
| <i>CsDof86</i> | TATA-box           | 1141                  | 1145                 | core promoter element around -30 of transcription start |
| <i>CsDof86</i> | TATA-box           | 1185                  | 1191                 | core promoter element around -30 of transcription start |
| <i>CsDof86</i> | TATA-box           | 1186                  | 1190                 | core promoter element around -30 of transcription start |
| <i>CsDof86</i> | TATA-box           | 1203                  | 1210                 | core promoter element around -30 of transcription start |
| <i>CsDof86</i> | TATA-box           | 1204                  | 1210                 | core promoter element around -30 of transcription start |
| <i>CsDof86</i> | TATA-box           | 1205                  | 1211                 | core promoter element around -30 of transcription start |
| <i>CsDof86</i> | TATA-box           | 1206                  | 1210                 | core promoter element around -30 of transcription start |
| <i>CsDof86</i> | TATA-box           | 1223                  | 1231                 | core promoter element around -30 of transcription start |
| <i>CsDof86</i> | TATA-box           | 1244                  | 1252                 | core promoter element around -30 of transcription start |
| <i>CsDof86</i> | TATA-box           | 1255                  | 1262                 | core promoter element around -30 of transcription start |
| <i>CsDof86</i> | TATA-box           | 1256                  | 1262                 | core promoter element around -30 of transcription start |
| <i>CsDof86</i> | TATA-box           | 1257                  | 1263                 | core promoter element around -30 of transcription start |
| <i>CsDof86</i> | TATA-box           | 1258                  | 1262                 | core promoter element around -30 of transcription start |
| <i>CsDof86</i> | TATA-box           | 1292                  | 1299                 | core promoter element around -30 of transcription start |
| <i>CsDof86</i> | TATA-box           | 1300                  | 1306                 | core promoter element around -30 of transcription start |
| <i>CsDof86</i> | TATA-box           | 1301                  | 1305                 | core promoter element around -30 of transcription start |
| <i>CsDof86</i> | TATA-box           | 1354                  | 1361                 | core promoter element around -30 of transcription start |
| <i>CsDof86</i> | TATA-box           | 1405                  | 1411                 | core promoter element around -30 of transcription start |

| Name           | Cis-element     | Start position | Stop position | Function                                                            |
|----------------|-----------------|----------------|---------------|---------------------------------------------------------------------|
| <i>CsDof86</i> | TATA-box        | 1406           | 1412          | core promoter element around -30 of transcription start             |
| <i>CsDof86</i> | TATA-box        | 1407           | 1413          | core promoter element around -30 of transcription start             |
| <i>CsDof86</i> | TATA-box        | 1408           | 1412          | core promoter element around -30 of transcription start             |
| <i>CsDof86</i> | TATA-box        | 1418           | 1424          | core promoter element around -30 of transcription start             |
| <i>CsDof86</i> | TATA-box        | 1419           | 1425          | core promoter element around -30 of transcription start             |
| <i>CsDof86</i> | TATA-box        | 1420           | 1426          | core promoter element around -30 of transcription start             |
| <i>CsDof86</i> | TATA-box        | 1421           | 1425          | core promoter element around -30 of transcription start             |
| <i>CsDof86</i> | TATA-box        | 1451           | 1455          | core promoter element around -30 of transcription start             |
| <i>CsDof86</i> | TATA-box        | 1543           | 1550          | core promoter element around -30 of transcription start             |
| <i>CsDof86</i> | TATA-box        | 1544           | 1550          | core promoter element around -30 of transcription start             |
| <i>CsDof86</i> | TATA-box        | 1545           | 1550          | core promoter element around -30 of transcription start             |
| <i>CsDof86</i> | TATA-box        | 1546           | 1550          | core promoter element around -30 of transcription start             |
| <i>CsDof86</i> | TATA-box        | 1554           | 1563          | core promoter element around -30 of transcription start             |
| <i>CsDof86</i> | TATA-box        | 1613           | 1617          | core promoter element around -30 of transcription start             |
| <i>CsDof86</i> | TATA-box        | 1715           | 1722          | core promoter element around -30 of transcription start             |
| <i>CsDof86</i> | TATA-box        | 1814           | 1818          | core promoter element around -30 of transcription start             |
| <i>CsDof86</i> | TATA-box        | 1913           | 1918          | core promoter element around -30 of transcription start             |
| <i>CsDof86</i> | TATA-box        | 1914           | 1918          | core promoter element around -30 of transcription start             |
| <i>CsDof86</i> | TATA-box        | 1928           | 1938          | core promoter element around -30 of transcription start             |
| <i>CsDof86</i> | TATA-box        | 1930           | 1934          | core promoter element around -30 of transcription start             |
| <i>CsDof86</i> | GT1-motif       | 877            | 884           | light responsive element                                            |
| <i>CsDof86</i> | GT1-motif       | 878            | 884           | light responsive element                                            |
| <i>CsDof86</i> | GT1-motif       | 1318           | 1325          | light responsive element                                            |
| <i>CsDof86</i> | MBS             | 8              | 14            | MYB binding site involved in drought-inducibility                   |
| <i>CsDof86</i> | MRE             | 201            | 208           | MYB binding site involved in light responsiveness                   |
| <i>CsDof86</i> | CCAAT-box       | 38             | 44            | MYBHv1 binding site                                                 |
| <i>CsDof87</i> | TC-rich repeats | 1794           | 1803          | cis-acting element involved in defense and stress responsiveness    |
| <i>CsDof87</i> | TATC-box        | 823            | 830           | cis-acting element involved in gibberellin-responsiveness           |
| <i>CsDof87</i> | ACE             | 888            | 897           | cis-acting element involved in light responsiveness                 |
| <i>CsDof87</i> | ACE             | 1362           | 1371          | cis-acting element involved in light responsiveness                 |
| <i>CsDof87</i> | TCA-element     | 1256           | 1265          | cis-acting element involved in salicylic acid responsiveness        |
| <i>CsDof87</i> | A-box           | 873            | 879           | cis-acting regulatory element                                       |
| <i>CsDof87</i> | ARE             | 572            | 578           | cis-acting regulatory element essential for the anaerobic induction |
| <i>CsDof87</i> | ARE             | 627            | 633           | cis-acting regulatory element essential for the anaerobic induction |
| <i>CsDof87</i> | ARE             | 678            | 684           | cis-acting regulatory element essential for the anaerobic induction |
| <i>CsDof87</i> | ARE             | 1338           | 1344          | cis-acting regulatory element essential for the anaerobic induction |
| <i>CsDof87</i> | CAAT-box        | 24             | 29            | common cis-acting element in promoter and enhancer regions          |
| <i>CsDof87</i> | CAAT-box        | 45             | 50            | common cis-acting element in promoter and enhancer regions          |
| <i>CsDof87</i> | CAAT-box        | 570            | 575           | common cis-acting element in promoter and enhancer regions          |
| <i>CsDof87</i> | CAAT-box        | 676            | 681           | common cis-acting element in promoter and enhancer regions          |
| <i>CsDof87</i> | CAAT-box        | 905            | 910           | common cis-acting element in promoter and enhancer regions          |
| <i>CsDof87</i> | CAAT-box        | 1058           | 1063          | common cis-acting element in promoter and enhancer regions          |
| <i>CsDof87</i> | CAAT-box        | 1154           | 1159          | common cis-acting element in promoter and enhancer regions          |
| <i>CsDof87</i> | CAAT-box        | 1265           | 1270          | common cis-acting element in promoter and enhancer regions          |
| <i>CsDof87</i> | CAAT-box        | 1437           | 1442          | common cis-acting element in promoter and enhancer regions          |
| <i>CsDof87</i> | CAAT-box        | 1687           | 1692          | common cis-acting element in promoter and enhancer regions          |
| <i>CsDof87</i> | TATA-box        | 69             | 73            | core promoter element around -30 of transcription start             |
| <i>CsDof87</i> | TATA-box        | 75             | 81            | core promoter element around -30 of transcription start             |
| <i>CsDof87</i> | TATA-box        | 76             | 81            | core promoter element around -30 of transcription start             |
| <i>CsDof87</i> | TATA-box        | 77             | 81            | core promoter element around -30 of transcription start             |
| <i>CsDof87</i> | TATA-box        | 112            | 118           | core promoter element around -30 of transcription start             |







| Name           | Cis-element      | Start position | Stop position | Function                                                            |
|----------------|------------------|----------------|---------------|---------------------------------------------------------------------|
| <i>CsDof87</i> | TATA-box         | 1547           | 1553          | core promoter element around -30 of transcription start             |
| <i>CsDof87</i> | TATA-box         | 1548           | 1554          | core promoter element around -30 of transcription start             |
| <i>CsDof87</i> | TATA-box         | 1549           | 1553          | core promoter element around -30 of transcription start             |
| <i>CsDof87</i> | TATA-box         | 1552           | 1564          | core promoter element around -30 of transcription start             |
| <i>CsDof87</i> | TATA-box         | 1554           | 1562          | core promoter element around -30 of transcription start             |
| <i>CsDof87</i> | TATA-box         | 1555           | 1562          | core promoter element around -30 of transcription start             |
| <i>CsDof87</i> | TATA-box         | 1556           | 1562          | core promoter element around -30 of transcription start             |
| <i>CsDof87</i> | TATA-box         | 1557           | 1562          | core promoter element around -30 of transcription start             |
| <i>CsDof87</i> | TATA-box         | 1558           | 1562          | core promoter element around -30 of transcription start             |
| <i>CsDof87</i> | TATA-box         | 1568           | 1574          | core promoter element around -30 of transcription start             |
| <i>CsDof87</i> | TATA-box         | 1569           | 1573          | core promoter element around -30 of transcription start             |
| <i>CsDof87</i> | TATA-box         | 1590           | 1595          | core promoter element around -30 of transcription start             |
| <i>CsDof87</i> | TATA-box         | 1591           | 1595          | core promoter element around -30 of transcription start             |
| <i>CsDof87</i> | TATA-box         | 1652           | 1658          | core promoter element around -30 of transcription start             |
| <i>CsDof87</i> | TATA-box         | 1653           | 1659          | core promoter element around -30 of transcription start             |
| <i>CsDof87</i> | TATA-box         | 1654           | 1660          | core promoter element around -30 of transcription start             |
| <i>CsDof87</i> | TATA-box         | 1655           | 1661          | core promoter element around -30 of transcription start             |
| <i>CsDof87</i> | TATA-box         | 1656           | 1662          | core promoter element around -30 of transcription start             |
| <i>CsDof87</i> | TATA-box         | 1657           | 1663          | core promoter element around -30 of transcription start             |
| <i>CsDof87</i> | TATA-box         | 1658           | 1664          | core promoter element around -30 of transcription start             |
| <i>CsDof87</i> | TATA-box         | 1659           | 1665          | core promoter element around -30 of transcription start             |
| <i>CsDof87</i> | TATA-box         | 1660           | 1666          | core promoter element around -30 of transcription start             |
| <i>CsDof87</i> | TATA-box         | 1661           | 1667          | core promoter element around -30 of transcription start             |
| <i>CsDof87</i> | TATA-box         | 1662           | 1668          | core promoter element around -30 of transcription start             |
| <i>CsDof87</i> | TATA-box         | 1663           | 1669          | core promoter element around -30 of transcription start             |
| <i>CsDof87</i> | TATA-box         | 1664           | 1670          | core promoter element around -30 of transcription start             |
| <i>CsDof87</i> | TATA-box         | 1665           | 1671          | core promoter element around -30 of transcription start             |
| <i>CsDof87</i> | TATA-box         | 1666           | 1672          | core promoter element around -30 of transcription start             |
| <i>CsDof87</i> | TATA-box         | 1667           | 1673          | core promoter element around -30 of transcription start             |
| <i>CsDof87</i> | TATA-box         | 1668           | 1674          | core promoter element around -30 of transcription start             |
| <i>CsDof87</i> | TATA-box         | 1669           | 1675          | core promoter element around -30 of transcription start             |
| <i>CsDof87</i> | TATA-box         | 1670           | 1676          | core promoter element around -30 of transcription start             |
| <i>CsDof87</i> | TATA-box         | 1671           | 1677          | core promoter element around -30 of transcription start             |
| <i>CsDof87</i> | TATA-box         | 1672           | 1678          | core promoter element around -30 of transcription start             |
| <i>CsDof87</i> | TATA-box         | 1673           | 1679          | core promoter element around -30 of transcription start             |
| <i>CsDof87</i> | TATA-box         | 1674           | 1680          | core promoter element around -30 of transcription start             |
| <i>CsDof87</i> | TATA-box         | 1675           | 1681          | core promoter element around -30 of transcription start             |
| <i>CsDof87</i> | TATA-box         | 1676           | 1682          | core promoter element around -30 of transcription start             |
| <i>CsDof87</i> | TATA-box         | 1677           | 1683          | core promoter element around -30 of transcription start             |
| <i>CsDof87</i> | TATA-box         | 1679           | 1683          | core promoter element around -30 of transcription start             |
| <i>CsDof87</i> | TATA-box         | 1714           | 1720          | core promoter element around -30 of transcription start             |
| <i>CsDof87</i> | TATA-box         | 1715           | 1721          | core promoter element around -30 of transcription start             |
| <i>CsDof87</i> | TATA-box         | 1716           | 1722          | core promoter element around -30 of transcription start             |
| <i>CsDof87</i> | TATA-box         | 1717           | 1723          | core promoter element around -30 of transcription start             |
| <i>CsDof87</i> | TATA-box         | 1718           | 1724          | core promoter element around -30 of transcription start             |
| <i>CsDof87</i> | TATA-box         | 1719           | 1723          | core promoter element around -30 of transcription start             |
| <i>CsDof87</i> | AT-rich sequence | 1407           | 1416          | element for maximal elicitor-mediated activation (2copies)          |
| <i>CsDof87</i> | HD-Zip 1         | 604            | 612.5         | element involved in differentiation of the palisade mesophyll cells |
| <i>CsDof87</i> | P-box            | 1841           | 1848          | gibberellin-responsive element                                      |
| <i>CsDof88</i> | ABRE             | 1855           | 1860          | abscisic acid responsiveness                                        |
| <i>CsDof88</i> | ARE              | 508            | 514           | cis-acting regulatory element essential for the anaerobic induction |

| Name           | Cis-element | Start position | Stop position | Function                                                            |
|----------------|-------------|----------------|---------------|---------------------------------------------------------------------|
| <i>CsDof88</i> | ARE         | 1310           | 1316          | cis-acting regulatory element essential for the anaerobic induction |
| <i>CsDof88</i> | ARE         | 1951           | 1957          | cis-acting regulatory element essential for the anaerobic induction |
| <i>CsDof88</i> | circadian   | 1470           | 1479          | cis-acting regulatory element involved in circadian control         |
| <i>CsDof88</i> | G-box       | 1855           | 1861          | cis-acting regulatory element involved in light responsiveness      |
| <i>CsDof88</i> | TGACG-motif | 1178           | 1183          | cis-acting regulatory element involved in the MeJA-responsiveness   |
| <i>CsDof88</i> | TGACG-motif | 1886           | 1891          | cis-acting regulatory element involved in the MeJA-responsiveness   |
| <i>CsDof88</i> | CGTCA-motif | 1178           | 1183          | cis-acting regulatory element involved in the MeJA-responsiveness   |
| <i>CsDof88</i> | CGTCA-motif | 1886           | 1891          | cis-acting regulatory element involved in the MeJA-responsiveness   |
| <i>CsDof88</i> | motif I     | 1852           | 1862          | cis-acting regulatory element root specific                         |
| <i>CsDof88</i> | CAAT-box    | 421            | 426           | common cis-acting element in promoter and enhancer regions          |
| <i>CsDof88</i> | CAAT-box    | 496            | 501           | common cis-acting element in promoter and enhancer regions          |
| <i>CsDof88</i> | CAAT-box    | 528            | 533           | common cis-acting element in promoter and enhancer regions          |
| <i>CsDof88</i> | CAAT-box    | 712            | 717           | common cis-acting element in promoter and enhancer regions          |
| <i>CsDof88</i> | CAAT-box    | 814            | 819           | common cis-acting element in promoter and enhancer regions          |
| <i>CsDof88</i> | CAAT-box    | 840            | 845           | common cis-acting element in promoter and enhancer regions          |
| <i>CsDof88</i> | CAAT-box    | 963            | 968           | common cis-acting element in promoter and enhancer regions          |
| <i>CsDof88</i> | CAAT-box    | 1585           | 1590          | common cis-acting element in promoter and enhancer regions          |
| <i>CsDof88</i> | CAAT-box    | 1609           | 1614          | common cis-acting element in promoter and enhancer regions          |
| <i>CsDof88</i> | CAAT-box    | 1620           | 1625          | common cis-acting element in promoter and enhancer regions          |
| <i>CsDof88</i> | CAAT-box    | 1725           | 1730          | common cis-acting element in promoter and enhancer regions          |
| <i>CsDof88</i> | CAAT-box    | 1728           | 1733          | common cis-acting element in promoter and enhancer regions          |
| <i>CsDof88</i> | CAAT-box    | 1911           | 1916          | common cis-acting element in promoter and enhancer regions          |
| <i>CsDof88</i> | CAAT-box    | 1958           | 1963          | common cis-acting element in promoter and enhancer regions          |
| <i>CsDof88</i> | TATA-box    | 12             | 19            | core promoter element around -30 of transcription start             |
| <i>CsDof88</i> | TATA-box    | 363            | 369           | core promoter element around -30 of transcription start             |
| <i>CsDof88</i> | TATA-box    | 364            | 368           | core promoter element around -30 of transcription start             |
| <i>CsDof88</i> | TATA-box    | 553            | 560           | core promoter element around -30 of transcription start             |
| <i>CsDof88</i> | TATA-box    | 621            | 628           | core promoter element around -30 of transcription start             |
| <i>CsDof88</i> | TATA-box    | 736            | 742           | core promoter element around -30 of transcription start             |
| <i>CsDof88</i> | TATA-box    | 737            | 742           | core promoter element around -30 of transcription start             |
| <i>CsDof88</i> | TATA-box    | 738            | 742           | core promoter element around -30 of transcription start             |
| <i>CsDof88</i> | TATA-box    | 748            | 752           | core promoter element around -30 of transcription start             |
| <i>CsDof88</i> | TATA-box    | 1108           | 1116          | core promoter element around -30 of transcription start             |
| <i>CsDof88</i> | TATA-box    | 1113           | 1119          | core promoter element around -30 of transcription start             |
| <i>CsDof88</i> | TATA-box    | 1114           | 1118          | core promoter element around -30 of transcription start             |
| <i>CsDof88</i> | TATA-box    | 1137           | 1143          | core promoter element around -30 of transcription start             |
| <i>CsDof88</i> | TATA-box    | 1138           | 1143          | core promoter element around -30 of transcription start             |
| <i>CsDof88</i> | TATA-box    | 1139           | 1143          | core promoter element around -30 of transcription start             |
| <i>CsDof88</i> | TATA-box    | 1198           | 1204          | core promoter element around -30 of transcription start             |
| <i>CsDof88</i> | TATA-box    | 1199           | 1203          | core promoter element around -30 of transcription start             |
| <i>CsDof88</i> | TATA-box    | 1213           | 1220          | core promoter element around -30 of transcription start             |
| <i>CsDof88</i> | TATA-box    | 1216           | 1222          | core promoter element around -30 of transcription start             |
| <i>CsDof88</i> | TATA-box    | 1218           | 1222          | core promoter element around -30 of transcription start             |
| <i>CsDof88</i> | TATA-box    | 1315           | 1321          | core promoter element around -30 of transcription start             |
| <i>CsDof88</i> | TATA-box    | 1316           | 1320          | core promoter element around -30 of transcription start             |
| <i>CsDof88</i> | TATA-box    | 1352           | 1361          | core promoter element around -30 of transcription start             |
| <i>CsDof88</i> | TATA-box    | 1353           | 1362          | core promoter element around -30 of transcription start             |
| <i>CsDof88</i> | TATA-box    | 1354           | 1360          | core promoter element around -30 of transcription start             |
| <i>CsDof88</i> | TATA-box    | 1355           | 1362          | core promoter element around -30 of transcription start             |
| <i>CsDof88</i> | TATA-box    | 1356           | 1362          | core promoter element around -30 of transcription start             |
| <i>CsDof88</i> | TATA-box    | 1357           | 1363          | core promoter element around -30 of transcription start             |

| Name           | Cis-element     | Start position | Stop position | Function                                                            |
|----------------|-----------------|----------------|---------------|---------------------------------------------------------------------|
| <i>CsDof88</i> | TATA-box        | 1358           | 1362          | core promoter element around -30 of transcription start             |
| <i>CsDof88</i> | TATA-box        | 1581           | 1585          | core promoter element around -30 of transcription start             |
| <i>CsDof88</i> | TATA-box        | 1872           | 1879          | core promoter element around -30 of transcription start             |
| <i>CsDof88</i> | TATA-box        | 1873           | 1879          | core promoter element around -30 of transcription start             |
| <i>CsDof88</i> | TATA-box        | 1874           | 1880          | core promoter element around -30 of transcription start             |
| <i>CsDof88</i> | TATA-box        | 1875           | 1879          | core promoter element around -30 of transcription start             |
| <i>CsDof88</i> | P-box           | 387            | 394           | gibberellin-responsive element                                      |
| <i>CsDof88</i> | P-box           | 1972           | 1979          | gibberellin-responsive element                                      |
| <i>CsDof88</i> | GT1-motif       | 473            | 479           | light responsive element                                            |
| <i>CsDof88</i> | GT1-motif       | 1027           | 1033          | light responsive element                                            |
| <i>CsDof88</i> | MRE             | 207            | 214           | MYB binding site involved in light responsiveness                   |
| <i>CsDof89</i> | ABRE            | 923            | 932           | abscisic acid responsiveness                                        |
| <i>CsDof89</i> | ABRE            | 925            | 931           | abscisic acid responsiveness                                        |
| <i>CsDof89</i> | ABRE            | 926            | 931           | abscisic acid responsiveness                                        |
| <i>CsDof89</i> | ABRE            | 1120           | 1129          | abscisic acid responsiveness                                        |
| <i>CsDof89</i> | ABRE            | 1122           | 1128          | abscisic acid responsiveness                                        |
| <i>CsDof89</i> | ABRE            | 1123           | 1128          | abscisic acid responsiveness                                        |
| <i>CsDof89</i> | ABRE            | 1211           | 1217          | abscisic acid responsiveness                                        |
| <i>CsDof89</i> | ABRE            | 1212           | 1217          | abscisic acid responsiveness                                        |
| <i>CsDof89</i> | ABRE            | 1232           | 1237          | abscisic acid responsiveness                                        |
| <i>CsDof89</i> | ABRE            | 1282           | 1288          | abscisic acid responsiveness                                        |
| <i>CsDof89</i> | ABRE            | 1283           | 1288          | abscisic acid responsiveness                                        |
| <i>CsDof89</i> | AT-rich element | 465            | 475           | binding site of AT-rich DNA binding protein (ATBP-1)                |
| <i>CsDof89</i> | TATC-box        | 43             | 50            | cis-acting element involved in gibberellin-responsiveness           |
| <i>CsDof89</i> | TATC-box        | 874            | 881           | cis-acting element involved in gibberellin-responsiveness           |
| <i>CsDof89</i> | LTR             | 1256           | 1262          | cis-acting element involved in low-temperature responsiveness       |
| <i>CsDof89</i> | ARE             | 1789           | 1795          | cis-acting regulatory element essential for the anaerobic induction |
| <i>CsDof89</i> | AuxRR-core      | 1198           | 1205          | cis-acting regulatory element involved in auxin responsiveness      |
| <i>CsDof89</i> | G-box           | 922            | 934           | cis-acting regulatory element involved in light responsiveness      |
| <i>CsDof89</i> | G-box           | 923            | 932           | cis-acting regulatory element involved in light responsiveness      |
| <i>CsDof89</i> | G-box           | 925            | 931           | cis-acting regulatory element involved in light responsiveness      |
| <i>CsDof89</i> | G-box           | 1120           | 1129          | cis-acting regulatory element involved in light responsiveness      |
| <i>CsDof89</i> | G-box           | 1122           | 1128          | cis-acting regulatory element involved in light responsiveness      |
| <i>CsDof89</i> | G-box           | 1211           | 1217          | cis-acting regulatory element involved in light responsiveness      |
| <i>CsDof89</i> | G-box           | 1231           | 1237          | cis-acting regulatory element involved in light responsiveness      |
| <i>CsDof89</i> | G-box           | 1280           | 1289          | cis-acting regulatory element involved in light responsiveness      |
| <i>CsDof89</i> | G-box           | 1282           | 1288          | cis-acting regulatory element involved in light responsiveness      |
| <i>CsDof89</i> | G-Box           | 925            | 931           | cis-acting regulatory element involved in light responsiveness      |
| <i>CsDof89</i> | G-Box           | 1122           | 1128          | cis-acting regulatory element involved in light responsiveness      |
| <i>CsDof89</i> | G-Box           | 1211           | 1217          | cis-acting regulatory element involved in light responsiveness      |
| <i>CsDof89</i> | G-Box           | 1282           | 1288          | cis-acting regulatory element involved in light responsiveness      |
| <i>CsDof89</i> | RY-element      | 1146           | 1154          | cis-acting regulatory element involved in seed-specific regulation  |
| <i>CsDof89</i> | CGTCA-motif     | 592            | 597           | cis-acting regulatory element involved in the MeJA-responsiveness   |
| <i>CsDof89</i> | CGTCA-motif     | 607            | 612           | cis-acting regulatory element involved in the MeJA-responsiveness   |
| <i>CsDof89</i> | CGTCA-motif     | 1152           | 1157          | cis-acting regulatory element involved in the MeJA-responsiveness   |
| <i>CsDof89</i> | CGTCA-motif     | 1230           | 1235          | cis-acting regulatory element involved in the MeJA-responsiveness   |
| <i>CsDof89</i> | CGTCA-motif     | 1558           | 1563          | cis-acting regulatory element involved in the MeJA-responsiveness   |
| <i>CsDof89</i> | TGACG-motif     | 592            | 597           | cis-acting regulatory element involved in the MeJA-responsiveness   |
| <i>CsDof89</i> | TGACG-motif     | 607            | 612           | cis-acting regulatory element involved in the MeJA-responsiveness   |
| <i>CsDof89</i> | TGACG-motif     | 1152           | 1157          | cis-acting regulatory element involved in the MeJA-responsiveness   |
| <i>CsDof89</i> | TGACG-motif     | 1230           | 1235          | cis-acting regulatory element involved in the MeJA-responsiveness   |

| Name           | Cis-element | Start position | Stop position | Function                                                          |
|----------------|-------------|----------------|---------------|-------------------------------------------------------------------|
| <i>CsDof89</i> | TGACG-motif | 1558           | 1563          | cis-acting regulatory element involved in the MeJA-responsiveness |
| <i>CsDof89</i> | CAT-box     | 1893           | 1899          | cis-acting regulatory element related to meristem expression      |
| <i>CsDof89</i> | CAAT-box    | 3              | 8             | common cis-acting element in promoter and enhancer regions        |
| <i>CsDof89</i> | CAAT-box    | 188            | 193           | common cis-acting element in promoter and enhancer regions        |
| <i>CsDof89</i> | CAAT-box    | 210            | 215           | common cis-acting element in promoter and enhancer regions        |
| <i>CsDof89</i> | CAAT-box    | 282            | 287           | common cis-acting element in promoter and enhancer regions        |
| <i>CsDof89</i> | CAAT-box    | 299            | 304           | common cis-acting element in promoter and enhancer regions        |
| <i>CsDof89</i> | CAAT-box    | 336            | 341           | common cis-acting element in promoter and enhancer regions        |
| <i>CsDof89</i> | CAAT-box    | 377            | 382           | common cis-acting element in promoter and enhancer regions        |
| <i>CsDof89</i> | CAAT-box    | 387            | 392           | common cis-acting element in promoter and enhancer regions        |
| <i>CsDof89</i> | CAAT-box    | 423            | 428           | common cis-acting element in promoter and enhancer regions        |
| <i>CsDof89</i> | CAAT-box    | 428            | 433           | common cis-acting element in promoter and enhancer regions        |
| <i>CsDof89</i> | CAAT-box    | 526            | 531           | common cis-acting element in promoter and enhancer regions        |
| <i>CsDof89</i> | CAAT-box    | 814            | 819           | common cis-acting element in promoter and enhancer regions        |
| <i>CsDof89</i> | CAAT-box    | 1055           | 1060          | common cis-acting element in promoter and enhancer regions        |
| <i>CsDof89</i> | CAAT-box    | 1138           | 1143          | common cis-acting element in promoter and enhancer regions        |
| <i>CsDof89</i> | CAAT-box    | 1203           | 1208          | common cis-acting element in promoter and enhancer regions        |
| <i>CsDof89</i> | CAAT-box    | 1590           | 1595          | common cis-acting element in promoter and enhancer regions        |
| <i>CsDof89</i> | CAAT-box    | 1630           | 1635          | common cis-acting element in promoter and enhancer regions        |
| <i>CsDof89</i> | CAAT-box    | 1939           | 1946          | common cis-acting element in promoter and enhancer regions        |
| <i>CsDof89</i> | TATA-box    | 19             | 24            | core promoter element around -30 of transcription start           |
| <i>CsDof89</i> | TATA-box    | 20             | 24            | core promoter element around -30 of transcription start           |
| <i>CsDof89</i> | TATA-box    | 138            | 147           | core promoter element around -30 of transcription start           |
| <i>CsDof89</i> | TATA-box    | 139            | 146           | core promoter element around -30 of transcription start           |
| <i>CsDof89</i> | TATA-box    | 140            | 146           | core promoter element around -30 of transcription start           |
| <i>CsDof89</i> | TATA-box    | 141            | 146           | core promoter element around -30 of transcription start           |
| <i>CsDof89</i> | TATA-box    | 142            | 146           | core promoter element around -30 of transcription start           |
| <i>CsDof89</i> | TATA-box    | 287            | 292           | core promoter element around -30 of transcription start           |
| <i>CsDof89</i> | TATA-box    | 288            | 292           | core promoter element around -30 of transcription start           |
| <i>CsDof89</i> | TATA-box    | 361            | 365           | core promoter element around -30 of transcription start           |
| <i>CsDof89</i> | TATA-box    | 543            | 547           | core promoter element around -30 of transcription start           |
| <i>CsDof89</i> | TATA-box    | 567            | 571           | core promoter element around -30 of transcription start           |
| <i>CsDof89</i> | TATA-box    | 616            | 623           | core promoter element around -30 of transcription start           |
| <i>CsDof89</i> | TATA-box    | 617            | 623           | core promoter element around -30 of transcription start           |
| <i>CsDof89</i> | TATA-box    | 618            | 623           | core promoter element around -30 of transcription start           |
| <i>CsDof89</i> | TATA-box    | 619            | 623           | core promoter element around -30 of transcription start           |
| <i>CsDof89</i> | TATA-box    | 659            | 665           | core promoter element around -30 of transcription start           |
| <i>CsDof89</i> | TATA-box    | 661            | 665           | core promoter element around -30 of transcription start           |
| <i>CsDof89</i> | TATA-box    | 764            | 768           | core promoter element around -30 of transcription start           |
| <i>CsDof89</i> | TATA-box    | 791            | 797           | core promoter element around -30 of transcription start           |
| <i>CsDof89</i> | TATA-box    | 792            | 797           | core promoter element around -30 of transcription start           |
| <i>CsDof89</i> | TATA-box    | 793            | 797           | core promoter element around -30 of transcription start           |
| <i>CsDof89</i> | TATA-box    | 820            | 825           | core promoter element around -30 of transcription start           |
| <i>CsDof89</i> | TATA-box    | 821            | 825           | core promoter element around -30 of transcription start           |
| <i>CsDof89</i> | TATA-box    | 1076           | 1082          | core promoter element around -30 of transcription start           |
| <i>CsDof89</i> | TATA-box    | 1077           | 1083          | core promoter element around -30 of transcription start           |
| <i>CsDof89</i> | TATA-box    | 1078           | 1082          | core promoter element around -30 of transcription start           |
| <i>CsDof89</i> | TATA-box    | 1101           | 1107          | core promoter element around -30 of transcription start           |
| <i>CsDof89</i> | TATA-box    | 1102           | 1106          | core promoter element around -30 of transcription start           |
| <i>CsDof89</i> | TATA-box    | 1243           | 1251          | core promoter element around -30 of transcription start           |
| <i>CsDof89</i> | TATA-box    | 1546           | 1554          | core promoter element around -30 of transcription start           |

| Name           | Cis-element      | Start position | Stop position | Function                                                            |
|----------------|------------------|----------------|---------------|---------------------------------------------------------------------|
| <i>CsDof89</i> | TATA-box         | 1764           | 1772          | core promoter element around -30 of transcription start             |
| <i>CsDof89</i> | TATA-box         | 1766           | 1775          | core promoter element around -30 of transcription start             |
| <i>CsDof89</i> | TATA-box         | 1767           | 1772          | core promoter element around -30 of transcription start             |
| <i>CsDof89</i> | TATA-box         | 1768           | 1772          | core promoter element around -30 of transcription start             |
| <i>CsDof89</i> | TATA-box         | 1780           | 1787          | core promoter element around -30 of transcription start             |
| <i>CsDof89</i> | TATA-box         | 1841           | 1846          | core promoter element around -30 of transcription start             |
| <i>CsDof89</i> | TATA-box         | 1842           | 1846          | core promoter element around -30 of transcription start             |
| <i>CsDof89</i> | AT-rich sequence | 256            | 265           | element for maximal elicitor-mediated activation (2copies)          |
| <i>CsDof89</i> | HD-Zip 1         | 243            | 251           | element involved in differentiation of the palisade mesophyll cells |
| <i>CsDof89</i> | CCAAT-box        | 1515           | 1521          | MYBHv1 binding site                                                 |
| <i>CsDof90</i> | ABRE             | 1055           | 1064          | abscisic acid responsiveness                                        |
| <i>CsDof90</i> | ABRE             | 1057           | 1062          | abscisic acid responsiveness                                        |
| <i>CsDof90</i> | ABRE             | 1354           | 1359          | abscisic acid responsiveness                                        |
| <i>CsDof90</i> | LTR              | 1714           | 1720          | cis-acting element involved in low-temperature responsiveness       |
| <i>CsDof90</i> | TCA-element      | 990            | 1000          | cis-acting element involved in salicylic acid responsiveness        |
| <i>CsDof90</i> | ARE              | 654            | 660           | cis-acting regulatory element essential for the anaerobic induction |
| <i>CsDof90</i> | ARE              | 1273           | 1279          | cis-acting regulatory element essential for the anaerobic induction |
| <i>CsDof90</i> | ARE              | 1327           | 1333          | cis-acting regulatory element essential for the anaerobic induction |
| <i>CsDof90</i> | G-box            | 1057           | 1063          | cis-acting regulatory element involved in light responsiveness      |
| <i>CsDof90</i> | G-box            | 1354           | 1360          | cis-acting regulatory element involved in light responsiveness      |
| <i>CsDof90</i> | CAAT-box         | 825            | 830           | common cis-acting element in promoter and enhancer regions          |
| <i>CsDof90</i> | CAAT-box         | 837            | 842           | common cis-acting element in promoter and enhancer regions          |
| <i>CsDof90</i> | CAAT-box         | 1022           | 1027          | common cis-acting element in promoter and enhancer regions          |
| <i>CsDof90</i> | CAAT-box         | 1153           | 1158          | common cis-acting element in promoter and enhancer regions          |
| <i>CsDof90</i> | CAAT-box         | 1266           | 1271          | common cis-acting element in promoter and enhancer regions          |
| <i>CsDof90</i> | CAAT-box         | 1777           | 1782          | common cis-acting element in promoter and enhancer regions          |
| <i>CsDof90</i> | CAAT-box         | 1908           | 1913          | common cis-acting element in promoter and enhancer regions          |
| <i>CsDof90</i> | TATA-box         | 737            | 743           | core promoter element around -30 of transcription start             |
| <i>CsDof90</i> | TATA-box         | 738            | 745           | core promoter element around -30 of transcription start             |
| <i>CsDof90</i> | TATA-box         | 739            | 745           | core promoter element around -30 of transcription start             |
| <i>CsDof90</i> | TATA-box         | 740            | 746           | core promoter element around -30 of transcription start             |
| <i>CsDof90</i> | TATA-box         | 741            | 745           | core promoter element around -30 of transcription start             |
| <i>CsDof90</i> | TATA-box         | 889            | 893           | core promoter element around -30 of transcription start             |
| <i>CsDof90</i> | TATA-box         | 926            | 932           | core promoter element around -30 of transcription start             |
| <i>CsDof90</i> | TATA-box         | 927            | 932           | core promoter element around -30 of transcription start             |
| <i>CsDof90</i> | TATA-box         | 928            | 932           | core promoter element around -30 of transcription start             |
| <i>CsDof90</i> | TATA-box         | 980            | 984           | core promoter element around -30 of transcription start             |
| <i>CsDof90</i> | TATA-box         | 1017           | 1023          | core promoter element around -30 of transcription start             |
| <i>CsDof90</i> | TATA-box         | 1018           | 1023          | core promoter element around -30 of transcription start             |
| <i>CsDof90</i> | TATA-box         | 1019           | 1023          | core promoter element around -30 of transcription start             |
| <i>CsDof90</i> | TATA-box         | 1047           | 1051          | core promoter element around -30 of transcription start             |
| <i>CsDof90</i> | TATA-box         | 1128           | 1134          | core promoter element around -30 of transcription start             |
| <i>CsDof90</i> | TATA-box         | 1129           | 1134          | core promoter element around -30 of transcription start             |
| <i>CsDof90</i> | TATA-box         | 1130           | 1134          | core promoter element around -30 of transcription start             |
| <i>CsDof90</i> | TATA-box         | 1175           | 1180          | core promoter element around -30 of transcription start             |
| <i>CsDof90</i> | TATA-box         | 1176           | 1180          | core promoter element around -30 of transcription start             |
| <i>CsDof90</i> | TATA-box         | 1193           | 1201          | core promoter element around -30 of transcription start             |
| <i>CsDof90</i> | TATA-box         | 1252           | 1256          | core promoter element around -30 of transcription start             |
| <i>CsDof90</i> | TATA-box         | 1274           | 1283          | core promoter element around -30 of transcription start             |
| <i>CsDof90</i> | TATA-box         | 1276           | 1282          | core promoter element around -30 of transcription start             |
| <i>CsDof90</i> | TATA-box         | 1277           | 1284          | core promoter element around -30 of transcription start             |

| Name           | Cis-element        | Start position | Stop position | Function                                                            |
|----------------|--------------------|----------------|---------------|---------------------------------------------------------------------|
| <i>CsDof90</i> | TATA-box           | 1278           | 1284          | core promoter element around -30 of transcription start             |
| <i>CsDof90</i> | TATA-box           | 1279           | 1285          | core promoter element around -30 of transcription start             |
| <i>CsDof90</i> | TATA-box           | 1280           | 1286          | core promoter element around -30 of transcription start             |
| <i>CsDof90</i> | TATA-box           | 1281           | 1287          | core promoter element around -30 of transcription start             |
| <i>CsDof90</i> | TATA-box           | 1282           | 1288          | core promoter element around -30 of transcription start             |
| <i>CsDof90</i> | TATA-box           | 1283           | 1289          | core promoter element around -30 of transcription start             |
| <i>CsDof90</i> | TATA-box           | 1284           | 1290          | core promoter element around -30 of transcription start             |
| <i>CsDof90</i> | TATA-box           | 1285           | 1291          | core promoter element around -30 of transcription start             |
| <i>CsDof90</i> | TATA-box           | 1286           | 1292          | core promoter element around -30 of transcription start             |
| <i>CsDof90</i> | TATA-box           | 1287           | 1293          | core promoter element around -30 of transcription start             |
| <i>CsDof90</i> | TATA-box           | 1288           | 1292          | core promoter element around -30 of transcription start             |
| <i>CsDof90</i> | TATA-box           | 1406           | 1412          | core promoter element around -30 of transcription start             |
| <i>CsDof90</i> | TATA-box           | 1407           | 1412          | core promoter element around -30 of transcription start             |
| <i>CsDof90</i> | TATA-box           | 1408           | 1412          | core promoter element around -30 of transcription start             |
| <i>CsDof90</i> | TATA-box           | 1436           | 1441          | core promoter element around -30 of transcription start             |
| <i>CsDof90</i> | TATA-box           | 1437           | 1441          | core promoter element around -30 of transcription start             |
| <i>CsDof90</i> | TATA-box           | 1455           | 1462          | core promoter element around -30 of transcription start             |
| <i>CsDof90</i> | TATA-box           | 1461           | 1467          | core promoter element around -30 of transcription start             |
| <i>CsDof90</i> | TATA-box           | 1462           | 1468          | core promoter element around -30 of transcription start             |
| <i>CsDof90</i> | TATA-box           | 1463           | 1469          | core promoter element around -30 of transcription start             |
| <i>CsDof90</i> | TATA-box           | 1464           | 1468          | core promoter element around -30 of transcription start             |
| <i>CsDof90</i> | TATA-box           | 1495           | 1500          | core promoter element around -30 of transcription start             |
| <i>CsDof90</i> | TATA-box           | 1496           | 1500          | core promoter element around -30 of transcription start             |
| <i>CsDof90</i> | TATA-box           | 1506           | 1512          | core promoter element around -30 of transcription start             |
| <i>CsDof90</i> | TATA-box           | 1508           | 1512          | core promoter element around -30 of transcription start             |
| <i>CsDof90</i> | TATA-box           | 1532           | 1538          | core promoter element around -30 of transcription start             |
| <i>CsDof90</i> | TATA-box           | 1533           | 1539          | core promoter element around -30 of transcription start             |
| <i>CsDof90</i> | TATA-box           | 1534           | 1540          | core promoter element around -30 of transcription start             |
| <i>CsDof90</i> | TATA-box           | 1535           | 1541          | core promoter element around -30 of transcription start             |
| <i>CsDof90</i> | TATA-box           | 1536           | 1540          | core promoter element around -30 of transcription start             |
| <i>CsDof90</i> | TATA-box           | 1569           | 1574          | core promoter element around -30 of transcription start             |
| <i>CsDof90</i> | TATA-box           | 1570           | 1574          | core promoter element around -30 of transcription start             |
| <i>CsDof90</i> | TATA-box           | 1644           | 1648          | core promoter element around -30 of transcription start             |
| <i>CsDof90</i> | TATA-box           | 1656           | 1660          | core promoter element around -30 of transcription start             |
| <i>CsDof90</i> | TATA-box           | 1682           | 1688          | core promoter element around -30 of transcription start             |
| <i>CsDof90</i> | TATA-box           | 1683           | 1688          | core promoter element around -30 of transcription start             |
| <i>CsDof90</i> | TATA-box           | 1684           | 1688          | core promoter element around -30 of transcription start             |
| <i>CsDof90</i> | TATA-box           | 1691           | 1697          | core promoter element around -30 of transcription start             |
| <i>CsDof90</i> | TATA-box           | 1692           | 1698          | core promoter element around -30 of transcription start             |
| <i>CsDof90</i> | TATA-box           | 1694           | 1698          | core promoter element around -30 of transcription start             |
| <i>CsDof90</i> | 3-AF1 binding site | 1556           | 1566          | light responsive element                                            |
| <i>CsDof90</i> | 3-AF1 binding site | 1858           | 1868          | light responsive element                                            |
| <i>CsDof91</i> | ABRE               | 710            | 716           | abscisic acid responsiveness                                        |
| <i>CsDof91</i> | ABRE               | 711            | 716           | abscisic acid responsiveness                                        |
| <i>CsDof91</i> | ABRE               | 1805           | 1810          | abscisic acid responsiveness                                        |
| <i>CsDof91</i> | TC-rich repeats    | 950            | 959           | cis-acting element involved in defense and stress responsiveness    |
| <i>CsDof91</i> | LTR                | 376            | 382           | cis-acting element involved in low-temperature responsiveness       |
| <i>CsDof91</i> | TCA-element        | 1309           | 1318          | cis-acting element involved in salicylic acid responsiveness        |
| <i>CsDof91</i> | ARE                | 861            | 867           | cis-acting regulatory element essential for the anaerobic induction |
| <i>CsDof91</i> | ARE                | 1482           | 1488          | cis-acting regulatory element essential for the anaerobic induction |
| <i>CsDof91</i> | G-box              | 84             | 93            | cis-acting regulatory element involved in light responsiveness      |

| Name           | Cis-element | Start position | Stop position | Function                                                          |
|----------------|-------------|----------------|---------------|-------------------------------------------------------------------|
| <i>CsDof91</i> | G-box       | 710            | 716           | cis-acting regulatory element involved in light responsiveness    |
| <i>CsDof91</i> | G-box       | 1517           | 1523          | cis-acting regulatory element involved in light responsiveness    |
| <i>CsDof91</i> | G-box       | 1805           | 1813          | cis-acting regulatory element involved in light responsiveness    |
| <i>CsDof91</i> | G-Box       | 710            | 716           | cis-acting regulatory element involved in light responsiveness    |
| <i>CsDof91</i> | G-Box       | 1805           | 1811          | cis-acting regulatory element involved in light responsiveness    |
| <i>CsDof91</i> | TGACG-motif | 1123           | 1128          | cis-acting regulatory element involved in the MeJA-responsiveness |
| <i>CsDof91</i> | CGTCA-motif | 1123           | 1128          | cis-acting regulatory element involved in the MeJA-responsiveness |
| <i>CsDof91</i> | CAAT-box    | 32             | 37            | common cis-acting element in promoter and enhancer regions        |
| <i>CsDof91</i> | CAAT-box    | 172            | 177           | common cis-acting element in promoter and enhancer regions        |
| <i>CsDof91</i> | CAAT-box    | 371            | 376           | common cis-acting element in promoter and enhancer regions        |
| <i>CsDof91</i> | CAAT-box    | 480            | 485           | common cis-acting element in promoter and enhancer regions        |
| <i>CsDof91</i> | CAAT-box    | 521            | 526           | common cis-acting element in promoter and enhancer regions        |
| <i>CsDof91</i> | CAAT-box    | 617            | 622           | common cis-acting element in promoter and enhancer regions        |
| <i>CsDof91</i> | CAAT-box    | 817            | 822           | common cis-acting element in promoter and enhancer regions        |
| <i>CsDof91</i> | CAAT-box    | 835            | 840           | common cis-acting element in promoter and enhancer regions        |
| <i>CsDof91</i> | CAAT-box    | 1413           | 1418          | common cis-acting element in promoter and enhancer regions        |
| <i>CsDof91</i> | CAAT-box    | 1577           | 1582          | common cis-acting element in promoter and enhancer regions        |
| <i>CsDof91</i> | CAAT-box    | 1646           | 1651          | common cis-acting element in promoter and enhancer regions        |
| <i>CsDof91</i> | CAAT-box    | 1742           | 1747          | common cis-acting element in promoter and enhancer regions        |
| <i>CsDof91</i> | CAAT-box    | 1956           | 1961          | common cis-acting element in promoter and enhancer regions        |
| <i>CsDof91</i> | TATA-box    | 266            | 273           | core promoter element around -30 of transcription start           |
| <i>CsDof91</i> | TATA-box    | 267            | 273           | core promoter element around -30 of transcription start           |
| <i>CsDof91</i> | TATA-box    | 268            | 274           | core promoter element around -30 of transcription start           |
| <i>CsDof91</i> | TATA-box    | 269            | 275           | core promoter element around -30 of transcription start           |
| <i>CsDof91</i> | TATA-box    | 271            | 275           | core promoter element around -30 of transcription start           |
| <i>CsDof91</i> | TATA-box    | 285            | 291           | core promoter element around -30 of transcription start           |
| <i>CsDof91</i> | TATA-box    | 286            | 291           | core promoter element around -30 of transcription start           |
| <i>CsDof91</i> | TATA-box    | 287            | 291           | core promoter element around -30 of transcription start           |
| <i>CsDof91</i> | TATA-box    | 300            | 306           | core promoter element around -30 of transcription start           |
| <i>CsDof91</i> | TATA-box    | 301            | 307           | core promoter element around -30 of transcription start           |
| <i>CsDof91</i> | TATA-box    | 302            | 308           | core promoter element around -30 of transcription start           |
| <i>CsDof91</i> | TATA-box    | 303            | 307           | core promoter element around -30 of transcription start           |
| <i>CsDof91</i> | TATA-box    | 421            | 430           | core promoter element around -30 of transcription start           |
| <i>CsDof91</i> | TATA-box    | 422            | 429           | core promoter element around -30 of transcription start           |
| <i>CsDof91</i> | TATA-box    | 423            | 429           | core promoter element around -30 of transcription start           |
| <i>CsDof91</i> | TATA-box    | 424            | 429           | core promoter element around -30 of transcription start           |
| <i>CsDof91</i> | TATA-box    | 425            | 429           | core promoter element around -30 of transcription start           |
| <i>CsDof91</i> | TATA-box    | 573            | 578           | core promoter element around -30 of transcription start           |
| <i>CsDof91</i> | TATA-box    | 574            | 578           | core promoter element around -30 of transcription start           |
| <i>CsDof91</i> | TATA-box    | 602            | 608           | core promoter element around -30 of transcription start           |
| <i>CsDof91</i> | TATA-box    | 603            | 609           | core promoter element around -30 of transcription start           |
| <i>CsDof91</i> | TATA-box    | 604            | 608           | core promoter element around -30 of transcription start           |
| <i>CsDof91</i> | TATA-box    | 768            | 772           | core promoter element around -30 of transcription start           |
| <i>CsDof91</i> | TATA-box    | 781            | 788           | core promoter element around -30 of transcription start           |
| <i>CsDof91</i> | TATA-box    | 782            | 788           | core promoter element around -30 of transcription start           |
| <i>CsDof91</i> | TATA-box    | 783            | 789           | core promoter element around -30 of transcription start           |
| <i>CsDof91</i> | TATA-box    | 784            | 788           | core promoter element around -30 of transcription start           |
| <i>CsDof91</i> | TATA-box    | 870            | 874           | core promoter element around -30 of transcription start           |
| <i>CsDof91</i> | TATA-box    | 937            | 941           | core promoter element around -30 of transcription start           |
| <i>CsDof91</i> | TATA-box    | 943            | 950           | core promoter element around -30 of transcription start           |
| <i>CsDof91</i> | TATA-box    | 972            | 979           | core promoter element around -30 of transcription start           |





| Name           | Cis-element | Start position | Stop position | Function                                                             |
|----------------|-------------|----------------|---------------|----------------------------------------------------------------------|
| <i>CsDof91</i> | TATA-box    | 1713           | 1719          | core promoter element around -30 of transcription start              |
| <i>CsDof91</i> | TATA-box    | 1714           | 1720          | core promoter element around -30 of transcription start              |
| <i>CsDof91</i> | TATA-box    | 1716           | 1720          | core promoter element around -30 of transcription start              |
| <i>CsDof91</i> | TATA-box    | 1897           | 1903          | core promoter element around -30 of transcription start              |
| <i>CsDof91</i> | TATA-box    | 1898           | 1904          | core promoter element around -30 of transcription start              |
| <i>CsDof91</i> | TATA-box    | 1899           | 1905          | core promoter element around -30 of transcription start              |
| <i>CsDof91</i> | TATA-box    | 1900           | 1904          | core promoter element around -30 of transcription start              |
| <i>CsDof91</i> | TATA-box    | 1925           | 1929          | core promoter element around -30 of transcription start              |
| <i>CsDof91</i> | TATA-box    | 1958           | 1966          | core promoter element around -30 of transcription start              |
| <i>CsDof91</i> | TATA-box    | 1991           | 1995          | core promoter element around -30 of transcription start              |
| <i>CsDof91</i> | Sp1         | 1800           | 1806          | light responsive element                                             |
| <i>CsDof91</i> | MRE         | 101            | 108           | MYB binding site involved in light responsiveness                    |
| <i>CsDof92</i> | ABRE        | 1829           | 1834          | abscisic acid responsiveness                                         |
| <i>CsDof92</i> | TCA-element | 1899           | 1908          | cis-acting element involved in salicylic acid responsiveness         |
| <i>CsDof92</i> | G-box       | 1828           | 1834          | cis-acting regulatory element involved in light responsiveness       |
| <i>CsDof92</i> | CAAT-box    | 1931           | 1936          | common cis-acting element in promoter and enhancer regions           |
| <i>CsDof92</i> | CAAT-box    | 1958           | 1963          | common cis-acting element in promoter and enhancer regions           |
| <i>CsDof92</i> | TATA-box    | 1903           | 1911          | core promoter element around -30 of transcription start              |
| <i>CsDof92</i> | TATA-box    | 1906           | 1911          | core promoter element around -30 of transcription start              |
| <i>CsDof92</i> | TATA-box    | 1907           | 1911          | core promoter element around -30 of transcription start              |
| <i>CsDof93</i> | ABRE        | 1209           | 1214          | abscisic acid responsiveness                                         |
| <i>CsDof93</i> | ACE         | 1770           | 1779          | cis-acting element involved in light responsiveness                  |
| <i>CsDof93</i> | LTR         | 214            | 220           | cis-acting element involved in low-temperature responsiveness        |
| <i>CsDof93</i> | LTR         | 301            | 307           | cis-acting element involved in low-temperature responsiveness        |
| <i>CsDof93</i> | LTR         | 383            | 389           | cis-acting element involved in low-temperature responsiveness        |
| <i>CsDof93</i> | LTR         | 392            | 398           | cis-acting element involved in low-temperature responsiveness        |
| <i>CsDof93</i> | TCA-element | 673            | 682           | cis-acting element involved in salicylic acid responsiveness         |
| <i>CsDof93</i> | TCA-element | 1886           | 1895          | cis-acting element involved in salicylic acid responsiveness         |
| <i>CsDof93</i> | ARE         | 1259           | 1265          | cis-acting regulatory element essential for the anaerobic induction  |
| <i>CsDof93</i> | ARE         | 1548           | 1554          | cis-acting regulatory element essential for the anaerobic induction  |
| <i>CsDof93</i> | G-Box       | 1209           | 1215          | cis-acting regulatory element involved in light responsiveness       |
| <i>CsDof93</i> | O2-site     | 646            | 655           | cis-acting regulatory element involved in zein metabolism regulation |
| <i>CsDof93</i> | O2-site     | 678            | 687           | cis-acting regulatory element involved in zein metabolism regulation |
| <i>CsDof93</i> | CAAT-box    | 75             | 80            | common cis-acting element in promoter and enhancer regions           |
| <i>CsDof93</i> | CAAT-box    | 446            | 451           | common cis-acting element in promoter and enhancer regions           |
| <i>CsDof93</i> | CAAT-box    | 795            | 800           | common cis-acting element in promoter and enhancer regions           |
| <i>CsDof93</i> | CAAT-box    | 1015           | 1020          | common cis-acting element in promoter and enhancer regions           |
| <i>CsDof93</i> | CAAT-box    | 1141           | 1146          | common cis-acting element in promoter and enhancer regions           |
| <i>CsDof93</i> | CAAT-box    | 1167           | 1172          | common cis-acting element in promoter and enhancer regions           |
| <i>CsDof93</i> | CAAT-box    | 1204           | 1209          | common cis-acting element in promoter and enhancer regions           |
| <i>CsDof93</i> | CAAT-box    | 1552           | 1557          | common cis-acting element in promoter and enhancer regions           |
| <i>CsDof93</i> | CAAT-box    | 1871           | 1876          | common cis-acting element in promoter and enhancer regions           |
| <i>CsDof93</i> | TATA-box    | 112            | 119           | core promoter element around -30 of transcription start              |
| <i>CsDof93</i> | TATA-box    | 219            | 225           | core promoter element around -30 of transcription start              |
| <i>CsDof93</i> | TATA-box    | 220            | 224           | core promoter element around -30 of transcription start              |
| <i>CsDof93</i> | TATA-box    | 415            | 421           | core promoter element around -30 of transcription start              |
| <i>CsDof93</i> | TATA-box    | 416            | 421           | core promoter element around -30 of transcription start              |
| <i>CsDof93</i> | TATA-box    | 417            | 421           | core promoter element around -30 of transcription start              |
| <i>CsDof93</i> | TATA-box    | 541            | 546           | core promoter element around -30 of transcription start              |
| <i>CsDof93</i> | TATA-box    | 542            | 546           | core promoter element around -30 of transcription start              |
| <i>CsDof93</i> | TATA-box    | 596            | 600           | core promoter element around -30 of transcription start              |

| Name           | Cis-element | Start position | Stop position | Function                                                |
|----------------|-------------|----------------|---------------|---------------------------------------------------------|
| <i>CsDof93</i> | TATA-box    | 857            | 862           | core promoter element around -30 of transcription start |
| <i>CsDof93</i> | TATA-box    | 858            | 862           | core promoter element around -30 of transcription start |
| <i>CsDof93</i> | TATA-box    | 878            | 884           | core promoter element around -30 of transcription start |
| <i>CsDof93</i> | TATA-box    | 879            | 883           | core promoter element around -30 of transcription start |
| <i>CsDof93</i> | TATA-box    | 1020           | 1026          | core promoter element around -30 of transcription start |
| <i>CsDof93</i> | TATA-box    | 1021           | 1028          | core promoter element around -30 of transcription start |
| <i>CsDof93</i> | TATA-box    | 1022           | 1028          | core promoter element around -30 of transcription start |
| <i>CsDof93</i> | TATA-box    | 1024           | 1028          | core promoter element around -30 of transcription start |
| <i>CsDof93</i> | TATA-box    | 1032           | 1038          | core promoter element around -30 of transcription start |
| <i>CsDof93</i> | TATA-box    | 1033           | 1037          | core promoter element around -30 of transcription start |
| <i>CsDof93</i> | TATA-box    | 1102           | 1106          | core promoter element around -30 of transcription start |
| <i>CsDof93</i> | TATA-box    | 1109           | 1113          | core promoter element around -30 of transcription start |
| <i>CsDof93</i> | TATA-box    | 1231           | 1240          | core promoter element around -30 of transcription start |
| <i>CsDof93</i> | TATA-box    | 1233           | 1241          | core promoter element around -30 of transcription start |
| <i>CsDof93</i> | TATA-box    | 1238           | 1244          | core promoter element around -30 of transcription start |
| <i>CsDof93</i> | TATA-box    | 1239           | 1243          | core promoter element around -30 of transcription start |
| <i>CsDof93</i> | TATA-box    | 1286           | 1293          | core promoter element around -30 of transcription start |
| <i>CsDof93</i> | TATA-box    | 1287           | 1293          | core promoter element around -30 of transcription start |
| <i>CsDof93</i> | TATA-box    | 1288           | 1294          | core promoter element around -30 of transcription start |
| <i>CsDof93</i> | TATA-box    | 1289           | 1293          | core promoter element around -30 of transcription start |
| <i>CsDof93</i> | TATA-box    | 1323           | 1329          | core promoter element around -30 of transcription start |
| <i>CsDof93</i> | TATA-box    | 1324           | 1329          | core promoter element around -30 of transcription start |
| <i>CsDof93</i> | TATA-box    | 1325           | 1329          | core promoter element around -30 of transcription start |
| <i>CsDof93</i> | TATA-box    | 1330           | 1334          | core promoter element around -30 of transcription start |
| <i>CsDof93</i> | TATA-box    | 1358           | 1365          | core promoter element around -30 of transcription start |
| <i>CsDof93</i> | TATA-box    | 1555           | 1561          | core promoter element around -30 of transcription start |
| <i>CsDof93</i> | TATA-box    | 1556           | 1560          | core promoter element around -30 of transcription start |
| <i>CsDof93</i> | TATA-box    | 1615           | 1622          | core promoter element around -30 of transcription start |
| <i>CsDof93</i> | TATA-box    | 1616           | 1622          | core promoter element around -30 of transcription start |
| <i>CsDof93</i> | TATA-box    | 1617           | 1622          | core promoter element around -30 of transcription start |
| <i>CsDof93</i> | TATA-box    | 1618           | 1622          | core promoter element around -30 of transcription start |
| <i>CsDof93</i> | TATA-box    | 1625           | 1629          | core promoter element around -30 of transcription start |
| <i>CsDof93</i> | TATA-box    | 1675           | 1681          | core promoter element around -30 of transcription start |
| <i>CsDof93</i> | TATA-box    | 1676           | 1681          | core promoter element around -30 of transcription start |
| <i>CsDof93</i> | TATA-box    | 1677           | 1681          | core promoter element around -30 of transcription start |
| <i>CsDof93</i> | TATA-box    | 1724           | 1730          | core promoter element around -30 of transcription start |
| <i>CsDof93</i> | TATA-box    | 1725           | 1729          | core promoter element around -30 of transcription start |
| <i>CsDof93</i> | TATA-box    | 1792           | 1799          | core promoter element around -30 of transcription start |
| <i>CsDof93</i> | TATA-box    | 1793           | 1799          | core promoter element around -30 of transcription start |
| <i>CsDof93</i> | TATA-box    | 1794           | 1799          | core promoter element around -30 of transcription start |
| <i>CsDof93</i> | TATA-box    | 1795           | 1799          | core promoter element around -30 of transcription start |
| <i>CsDof93</i> | TATA-box    | 1846           | 1852          | core promoter element around -30 of transcription start |
| <i>CsDof93</i> | TATA-box    | 1847           | 1851          | core promoter element around -30 of transcription start |
| <i>CsDof93</i> | TATA-box    | 1882           | 1889          | core promoter element around -30 of transcription start |
| <i>CsDof93</i> | TATA-box    | 1906           | 1915          | core promoter element around -30 of transcription start |
| <i>CsDof93</i> | TATA-box    | 1908           | 1912          | core promoter element around -30 of transcription start |
| <i>CsDof93</i> | GT1-motif   | 97             | 103           | light responsive element                                |
| <i>CsDof93</i> | GT1-motif   | 291            | 297           | light responsive element                                |
| <i>CsDof93</i> | AAAC-motif  | 1125           | 1136          | light responsive element                                |
| <i>CsDof93</i> | MRE         | 1123           | 1130          | MYB binding site involved in light responsiveness       |
| <i>CsDof94</i> | ABRE        | 643            | 648           | abscisic acid responsiveness                            |

| Name           | Cis-element     | Start position | Stop position | Function                                                            |
|----------------|-----------------|----------------|---------------|---------------------------------------------------------------------|
| <i>CsDof94</i> | TGA-element     | 1625           | 1631          | auxin-responsive element                                            |
| <i>CsDof94</i> | AT-rich element | 890            | 900           | binding site of AT-rich DNA binding protein (ATBP-1)                |
| <i>CsDof94</i> | ARE             | 451            | 457           | cis-acting regulatory element essential for the anaerobic induction |
| <i>CsDof94</i> | ARE             | 1283           | 1289          | cis-acting regulatory element essential for the anaerobic induction |
| <i>CsDof94</i> | ARE             | 1893           | 1899          | cis-acting regulatory element essential for the anaerobic induction |
| <i>CsDof94</i> | circadian       | 892            | 901           | cis-acting regulatory element involved in circadian control         |
| <i>CsDof94</i> | G-box           | 639            | 645           | cis-acting regulatory element involved in light responsiveness      |
| <i>CsDof94</i> | G-box           | 642            | 648           | cis-acting regulatory element involved in light responsiveness      |
| <i>CsDof94</i> | TGACG-motif     | 565            | 570           | cis-acting regulatory element involved in the MeJA-responsiveness   |
| <i>CsDof94</i> | CGTCA-motif     | 565            | 570           | cis-acting regulatory element involved in the MeJA-responsiveness   |
| <i>CsDof94</i> | CAT-box         | 499            | 505           | cis-acting regulatory element related to meristem expression        |
| <i>CsDof94</i> | CAT-box         | 1220           | 1226          | cis-acting regulatory element related to meristem expression        |
| <i>CsDof94</i> | CAAT-box        | 40             | 45            | common cis-acting element in promoter and enhancer regions          |
| <i>CsDof94</i> | CAAT-box        | 107            | 112           | common cis-acting element in promoter and enhancer regions          |
| <i>CsDof94</i> | CAAT-box        | 283            | 288           | common cis-acting element in promoter and enhancer regions          |
| <i>CsDof94</i> | CAAT-box        | 290            | 295           | common cis-acting element in promoter and enhancer regions          |
| <i>CsDof94</i> | CAAT-box        | 293            | 298           | common cis-acting element in promoter and enhancer regions          |
| <i>CsDof94</i> | CAAT-box        | 446            | 451           | common cis-acting element in promoter and enhancer regions          |
| <i>CsDof94</i> | CAAT-box        | 482            | 487           | common cis-acting element in promoter and enhancer regions          |
| <i>CsDof94</i> | CAAT-box        | 593            | 598           | common cis-acting element in promoter and enhancer regions          |
| <i>CsDof94</i> | CAAT-box        | 736            | 741           | common cis-acting element in promoter and enhancer regions          |
| <i>CsDof94</i> | CAAT-box        | 749            | 754           | common cis-acting element in promoter and enhancer regions          |
| <i>CsDof94</i> | CAAT-box        | 888            | 893           | common cis-acting element in promoter and enhancer regions          |
| <i>CsDof94</i> | CAAT-box        | 921            | 926           | common cis-acting element in promoter and enhancer regions          |
| <i>CsDof94</i> | CAAT-box        | 974            | 979           | common cis-acting element in promoter and enhancer regions          |
| <i>CsDof94</i> | CAAT-box        | 1016           | 1021          | common cis-acting element in promoter and enhancer regions          |
| <i>CsDof94</i> | CAAT-box        | 1117           | 1122          | common cis-acting element in promoter and enhancer regions          |
| <i>CsDof94</i> | CAAT-box        | 1176           | 1181          | common cis-acting element in promoter and enhancer regions          |
| <i>CsDof94</i> | CAAT-box        | 1430           | 1435          | common cis-acting element in promoter and enhancer regions          |
| <i>CsDof94</i> | CAAT-box        | 1585           | 1590          | common cis-acting element in promoter and enhancer regions          |
| <i>CsDof94</i> | CAAT-box        | 1616           | 1621          | common cis-acting element in promoter and enhancer regions          |
| <i>CsDof94</i> | CAAT-box        | 1632           | 1637          | common cis-acting element in promoter and enhancer regions          |
| <i>CsDof94</i> | CAAT-box        | 1707           | 1712          | common cis-acting element in promoter and enhancer regions          |
| <i>CsDof94</i> | CAAT-box        | 1719           | 1724          | common cis-acting element in promoter and enhancer regions          |
| <i>CsDof94</i> | CAAT-box        | 1784           | 1789          | common cis-acting element in promoter and enhancer regions          |
| <i>CsDof94</i> | CAAT-box        | 1830           | 1835          | common cis-acting element in promoter and enhancer regions          |
| <i>CsDof94</i> | TATA-box        | 128            | 132           | core promoter element around -30 of transcription start             |
| <i>CsDof94</i> | TATA-box        | 163            | 168           | core promoter element around -30 of transcription start             |
| <i>CsDof94</i> | TATA-box        | 164            | 168           | core promoter element around -30 of transcription start             |
| <i>CsDof94</i> | TATA-box        | 278            | 282           | core promoter element around -30 of transcription start             |
| <i>CsDof94</i> | TATA-box        | 382            | 386           | core promoter element around -30 of transcription start             |
| <i>CsDof94</i> | TATA-box        | 758            | 762           | core promoter element around -30 of transcription start             |
| <i>CsDof94</i> | TATA-box        | 775            | 781           | core promoter element around -30 of transcription start             |
| <i>CsDof94</i> | TATA-box        | 776            | 783           | core promoter element around -30 of transcription start             |
| <i>CsDof94</i> | TATA-box        | 777            | 783           | core promoter element around -30 of transcription start             |
| <i>CsDof94</i> | TATA-box        | 778            | 784           | core promoter element around -30 of transcription start             |
| <i>CsDof94</i> | TATA-box        | 779            | 783           | core promoter element around -30 of transcription start             |
| <i>CsDof94</i> | TATA-box        | 804            | 808           | core promoter element around -30 of transcription start             |
| <i>CsDof94</i> | TATA-box        | 823            | 827           | core promoter element around -30 of transcription start             |
| <i>CsDof94</i> | TATA-box        | 832            | 838           | core promoter element around -30 of transcription start             |
| <i>CsDof94</i> | TATA-box        | 833            | 840           | core promoter element around -30 of transcription start             |



| Name           | Cis-element | Start position | Stop position | Function                                                            |
|----------------|-------------|----------------|---------------|---------------------------------------------------------------------|
| <i>CsDof94</i> | TATA-box    | 1713           | 1719          | core promoter element around -30 of transcription start             |
| <i>CsDof94</i> | TATA-box    | 1714           | 1718          | core promoter element around -30 of transcription start             |
| <i>CsDof94</i> | TATA-box    | 1743           | 1750          | core promoter element around -30 of transcription start             |
| <i>CsDof94</i> | TATA-box    | 1744           | 1750          | core promoter element around -30 of transcription start             |
| <i>CsDof94</i> | TATA-box    | 1745           | 1750          | core promoter element around -30 of transcription start             |
| <i>CsDof94</i> | TATA-box    | 1746           | 1750          | core promoter element around -30 of transcription start             |
| <i>CsDof94</i> | TATA-box    | 1842           | 1848          | core promoter element around -30 of transcription start             |
| <i>CsDof94</i> | TATA-box    | 1843           | 1849          | core promoter element around -30 of transcription start             |
| <i>CsDof94</i> | TATA-box    | 1845           | 1849          | core promoter element around -30 of transcription start             |
| <i>CsDof94</i> | TATA-box    | 1886           | 1892          | core promoter element around -30 of transcription start             |
| <i>CsDof94</i> | TATA-box    | 1887           | 1893          | core promoter element around -30 of transcription start             |
| <i>CsDof94</i> | TATA-box    | 1888           | 1892          | core promoter element around -30 of transcription start             |
| <i>CsDof94</i> | TATA-box    | 1996           | 2001          | core promoter element around -30 of transcription start             |
| <i>CsDof94</i> | TATA-box    | 1997           | 2001          | core promoter element around -30 of transcription start             |
| <i>CsDof94</i> | GT1-motif   | 179            | 185           | light responsive element                                            |
| <i>CsDof94</i> | MBS         | 545            | 551           | MYB binding site involved in drought-inducibility                   |
| <i>CsDof94</i> | MBS         | 1858           | 1864          | MYB binding site involved in drought-inducibility                   |
| <i>CsDof95</i> | ABRE        | 559            | 564           | abscisic acid responsiveness                                        |
| <i>CsDof95</i> | LTR         | 1059           | 1065          | cis-acting element involved in low-temperature responsiveness       |
| <i>CsDof95</i> | TCA-element | 678            | 687           | cis-acting element involved in salicylic acid responsiveness        |
| <i>CsDof95</i> | TCA-element | 1897           | 1906          | cis-acting element involved in salicylic acid responsiveness        |
| <i>CsDof95</i> | ARE         | 562            | 568           | cis-acting regulatory element essential for the anaerobic induction |
| <i>CsDof95</i> | ARE         | 1706           | 1712          | cis-acting regulatory element essential for the anaerobic induction |
| <i>CsDof95</i> | G-Box       | 558            | 564           | cis-acting regulatory element involved in light responsiveness      |
| <i>CsDof95</i> | TGACG-motif | 419            | 424           | cis-acting regulatory element involved in the MeJA-responsiveness   |
| <i>CsDof95</i> | TGACG-motif | 553            | 558           | cis-acting regulatory element involved in the MeJA-responsiveness   |
| <i>CsDof95</i> | TGACG-motif | 629            | 634           | cis-acting regulatory element involved in the MeJA-responsiveness   |
| <i>CsDof95</i> | TGACG-motif | 1009           | 1014          | cis-acting regulatory element involved in the MeJA-responsiveness   |
| <i>CsDof95</i> | CGTCA-motif | 419            | 424           | cis-acting regulatory element involved in the MeJA-responsiveness   |
| <i>CsDof95</i> | CGTCA-motif | 553            | 558           | cis-acting regulatory element involved in the MeJA-responsiveness   |
| <i>CsDof95</i> | CGTCA-motif | 629            | 634           | cis-acting regulatory element involved in the MeJA-responsiveness   |
| <i>CsDof95</i> | CGTCA-motif | 1009           | 1014          | cis-acting regulatory element involved in the MeJA-responsiveness   |
| <i>CsDof95</i> | GCN4_motif  | 1018           | 1025          | cis-regulatory element involved in endosperm expression             |
| <i>CsDof95</i> | CAAT-box    | 24             | 29            | common cis-acting element in promoter and enhancer regions          |
| <i>CsDof95</i> | CAAT-box    | 224            | 229           | common cis-acting element in promoter and enhancer regions          |
| <i>CsDof95</i> | CAAT-box    | 259            | 264           | common cis-acting element in promoter and enhancer regions          |
| <i>CsDof95</i> | CAAT-box    | 279            | 284           | common cis-acting element in promoter and enhancer regions          |
| <i>CsDof95</i> | CAAT-box    | 473            | 478           | common cis-acting element in promoter and enhancer regions          |
| <i>CsDof95</i> | CAAT-box    | 494            | 499           | common cis-acting element in promoter and enhancer regions          |
| <i>CsDof95</i> | CAAT-box    | 849            | 854           | common cis-acting element in promoter and enhancer regions          |
| <i>CsDof95</i> | CAAT-box    | 857            | 862           | common cis-acting element in promoter and enhancer regions          |
| <i>CsDof95</i> | CAAT-box    | 892            | 897           | common cis-acting element in promoter and enhancer regions          |
| <i>CsDof95</i> | CAAT-box    | 939            | 944           | common cis-acting element in promoter and enhancer regions          |
| <i>CsDof95</i> | CAAT-box    | 1012           | 1017          | common cis-acting element in promoter and enhancer regions          |
| <i>CsDof95</i> | CAAT-box    | 1015           | 1020          | common cis-acting element in promoter and enhancer regions          |
| <i>CsDof95</i> | CAAT-box    | 1222           | 1227          | common cis-acting element in promoter and enhancer regions          |
| <i>CsDof95</i> | CAAT-box    | 1373           | 1378          | common cis-acting element in promoter and enhancer regions          |
| <i>CsDof95</i> | CAAT-box    | 1884           | 1889          | common cis-acting element in promoter and enhancer regions          |
| <i>CsDof95</i> | TATA-box    | 79             | 83            | core promoter element around -30 of transcription start             |
| <i>CsDof95</i> | TATA-box    | 94             | 100           | core promoter element around -30 of transcription start             |
| <i>CsDof95</i> | TATA-box    | 95             | 100           | core promoter element around -30 of transcription start             |

| Name           | Cis-element | Start position | Stop position | Function                                                            |
|----------------|-------------|----------------|---------------|---------------------------------------------------------------------|
| <i>CsDof95</i> | TATA-box    | 96             | 100           | core promoter element around -30 of transcription start             |
| <i>CsDof95</i> | TATA-box    | 249            | 255           | core promoter element around -30 of transcription start             |
| <i>CsDof95</i> | TATA-box    | 250            | 255           | core promoter element around -30 of transcription start             |
| <i>CsDof95</i> | TATA-box    | 251            | 255           | core promoter element around -30 of transcription start             |
| <i>CsDof95</i> | TATA-box    | 389            | 395           | core promoter element around -30 of transcription start             |
| <i>CsDof95</i> | TATA-box    | 390            | 395           | core promoter element around -30 of transcription start             |
| <i>CsDof95</i> | TATA-box    | 391            | 395           | core promoter element around -30 of transcription start             |
| <i>CsDof95</i> | TATA-box    | 617            | 624           | core promoter element around -30 of transcription start             |
| <i>CsDof95</i> | TATA-box    | 693            | 699           | core promoter element around -30 of transcription start             |
| <i>CsDof95</i> | TATA-box    | 694            | 698           | core promoter element around -30 of transcription start             |
| <i>CsDof95</i> | TATA-box    | 1216           | 1220          | core promoter element around -30 of transcription start             |
| <i>CsDof95</i> | TATA-box    | 1265           | 1269          | core promoter element around -30 of transcription start             |
| <i>CsDof95</i> | TATA-box    | 1310           | 1315          | core promoter element around -30 of transcription start             |
| <i>CsDof95</i> | TATA-box    | 1311           | 1315          | core promoter element around -30 of transcription start             |
| <i>CsDof95</i> | TATA-box    | 1412           | 1419          | core promoter element around -30 of transcription start             |
| <i>CsDof95</i> | TATA-box    | 1413           | 1419          | core promoter element around -30 of transcription start             |
| <i>CsDof95</i> | TATA-box    | 1414           | 1419          | core promoter element around -30 of transcription start             |
| <i>CsDof95</i> | TATA-box    | 1415           | 1419          | core promoter element around -30 of transcription start             |
| <i>CsDof95</i> | TATA-box    | 1452           | 1458          | core promoter element around -30 of transcription start             |
| <i>CsDof95</i> | TATA-box    | 1453           | 1459          | core promoter element around -30 of transcription start             |
| <i>CsDof95</i> | TATA-box    | 1454           | 1460          | core promoter element around -30 of transcription start             |
| <i>CsDof95</i> | TATA-box    | 1455           | 1459          | core promoter element around -30 of transcription start             |
| <i>CsDof95</i> | TATA-box    | 1461           | 1466          | core promoter element around -30 of transcription start             |
| <i>CsDof95</i> | TATA-box    | 1462           | 1466          | core promoter element around -30 of transcription start             |
| <i>CsDof95</i> | TATA-box    | 1486           | 1492          | core promoter element around -30 of transcription start             |
| <i>CsDof95</i> | TATA-box    | 1487           | 1491          | core promoter element around -30 of transcription start             |
| <i>CsDof95</i> | TATA-box    | 1508           | 1514          | core promoter element around -30 of transcription start             |
| <i>CsDof95</i> | TATA-box    | 1509           | 1513          | core promoter element around -30 of transcription start             |
| <i>CsDof95</i> | TATA-box    | 1608           | 1615          | core promoter element around -30 of transcription start             |
| <i>CsDof95</i> | TATA-box    | 1846           | 1850          | core promoter element around -30 of transcription start             |
| <i>CsDof95</i> | GT1-motif   | 1172           | 1178          | light responsive element                                            |
| <i>CsDof95</i> | MRE         | 1078           | 1085          | MYB binding site involved in light responsiveness                   |
| <i>CsDof95</i> | MRE         | 1250           | 1257          | MYB binding site involved in light responsiveness                   |
| <i>CsDof95</i> | WUN-motif   | 1378           | 1387          | wound-responsive element                                            |
| <i>CsDof96</i> | ABRE        | 1701           | 1706          | abscisic acid responsiveness                                        |
| <i>CsDof96</i> | TGA-element | 1154           | 1160          | auxin-responsive element                                            |
| <i>CsDof96</i> | LTR         | 1243           | 1249          | cis-acting element involved in low-temperature responsiveness       |
| <i>CsDof96</i> | ARE         | 807            | 813           | cis-acting regulatory element essential for the anaerobic induction |
| <i>CsDof96</i> | ARE         | 1458           | 1464          | cis-acting regulatory element essential for the anaerobic induction |
| <i>CsDof96</i> | ARE         | 1713           | 1719          | cis-acting regulatory element essential for the anaerobic induction |
| <i>CsDof96</i> | AuxRR-core  | 944            | 951           | cis-acting regulatory element involved in auxin responsiveness      |
| <i>CsDof96</i> | G-Box       | 1701           | 1707          | cis-acting regulatory element involved in light responsiveness      |
| <i>CsDof96</i> | CAT-box     | 1218           | 1224          | cis-acting regulatory element related to meristem expression        |
| <i>CsDof96</i> | CAAT-box    | 814            | 819           | common cis-acting element in promoter and enhancer regions          |
| <i>CsDof96</i> | CAAT-box    | 829            | 834           | common cis-acting element in promoter and enhancer regions          |
| <i>CsDof96</i> | CAAT-box    | 1012           | 1017          | common cis-acting element in promoter and enhancer regions          |
| <i>CsDof96</i> | CAAT-box    | 1126           | 1131          | common cis-acting element in promoter and enhancer regions          |
| <i>CsDof96</i> | CAAT-box    | 1402           | 1407          | common cis-acting element in promoter and enhancer regions          |
| <i>CsDof96</i> | CAAT-box    | 1415           | 1420          | common cis-acting element in promoter and enhancer regions          |
| <i>CsDof96</i> | CAAT-box    | 1486           | 1491          | common cis-acting element in promoter and enhancer regions          |
| <i>CsDof96</i> | CAAT-box    | 1578           | 1583          | common cis-acting element in promoter and enhancer regions          |

| Name           | Cis-element | Start position | Stop position | Function                                                          |
|----------------|-------------|----------------|---------------|-------------------------------------------------------------------|
| <i>CsDof96</i> | CAAT-box    | 1696           | 1701          | common cis-acting element in promoter and enhancer regions        |
| <i>CsDof96</i> | CAAT-box    | 1711           | 1716          | common cis-acting element in promoter and enhancer regions        |
| <i>CsDof96</i> | TATA-box    | 752            | 757           | core promoter element around -30 of transcription start           |
| <i>CsDof96</i> | TATA-box    | 753            | 757           | core promoter element around -30 of transcription start           |
| <i>CsDof96</i> | TATA-box    | 823            | 829           | core promoter element around -30 of transcription start           |
| <i>CsDof96</i> | TATA-box    | 824            | 828           | core promoter element around -30 of transcription start           |
| <i>CsDof96</i> | TATA-box    | 855            | 863           | core promoter element around -30 of transcription start           |
| <i>CsDof96</i> | TATA-box    | 899            | 903           | core promoter element around -30 of transcription start           |
| <i>CsDof96</i> | TATA-box    | 1174           | 1183          | core promoter element around -30 of transcription start           |
| <i>CsDof96</i> | TATA-box    | 1175           | 1182          | core promoter element around -30 of transcription start           |
| <i>CsDof96</i> | TATA-box    | 1176           | 1182          | core promoter element around -30 of transcription start           |
| <i>CsDof96</i> | TATA-box    | 1177           | 1184          | core promoter element around -30 of transcription start           |
| <i>CsDof96</i> | TATA-box    | 1178           | 1184          | core promoter element around -30 of transcription start           |
| <i>CsDof96</i> | TATA-box    | 1179           | 1185          | core promoter element around -30 of transcription start           |
| <i>CsDof96</i> | TATA-box    | 1180           | 1186          | core promoter element around -30 of transcription start           |
| <i>CsDof96</i> | TATA-box    | 1181           | 1187          | core promoter element around -30 of transcription start           |
| <i>CsDof96</i> | TATA-box    | 1182           | 1186          | core promoter element around -30 of transcription start           |
| <i>CsDof96</i> | TATA-box    | 1251           | 1255          | core promoter element around -30 of transcription start           |
| <i>CsDof96</i> | TATA-box    | 1256           | 1261          | core promoter element around -30 of transcription start           |
| <i>CsDof96</i> | TATA-box    | 1257           | 1261          | core promoter element around -30 of transcription start           |
| <i>CsDof96</i> | TATA-box    | 1284           | 1291          | core promoter element around -30 of transcription start           |
| <i>CsDof96</i> | TATA-box    | 1285           | 1291          | core promoter element around -30 of transcription start           |
| <i>CsDof96</i> | TATA-box    | 1286           | 1291          | core promoter element around -30 of transcription start           |
| <i>CsDof96</i> | TATA-box    | 1287           | 1291          | core promoter element around -30 of transcription start           |
| <i>CsDof96</i> | TATA-box    | 1332           | 1338          | core promoter element around -30 of transcription start           |
| <i>CsDof96</i> | TATA-box    | 1333           | 1337          | core promoter element around -30 of transcription start           |
| <i>CsDof96</i> | TATA-box    | 1383           | 1389          | core promoter element around -30 of transcription start           |
| <i>CsDof96</i> | TATA-box    | 1384           | 1389          | core promoter element around -30 of transcription start           |
| <i>CsDof96</i> | TATA-box    | 1385           | 1389          | core promoter element around -30 of transcription start           |
| <i>CsDof96</i> | TATA-box    | 1398           | 1402          | core promoter element around -30 of transcription start           |
| <i>CsDof96</i> | TATA-box    | 1429           | 1437          | core promoter element around -30 of transcription start           |
| <i>CsDof96</i> | TATA-box    | 1486           | 1495          | core promoter element around -30 of transcription start           |
| <i>CsDof96</i> | TATA-box    | 1565           | 1573          | core promoter element around -30 of transcription start           |
| <i>CsDof96</i> | TATA-box    | 1656           | 1662          | core promoter element around -30 of transcription start           |
| <i>CsDof96</i> | TATA-box    | 1657           | 1662          | core promoter element around -30 of transcription start           |
| <i>CsDof96</i> | TATA-box    | 1658           | 1662          | core promoter element around -30 of transcription start           |
| <i>CsDof96</i> | TATA-box    | 1838           | 1844          | core promoter element around -30 of transcription start           |
| <i>CsDof96</i> | TATA-box    | 1840           | 1846          | core promoter element around -30 of transcription start           |
| <i>CsDof96</i> | TATA-box    | 1841           | 1847          | core promoter element around -30 of transcription start           |
| <i>CsDof96</i> | TATA-box    | 1842           | 1848          | core promoter element around -30 of transcription start           |
| <i>CsDof96</i> | TATA-box    | 1844           | 1848          | core promoter element around -30 of transcription start           |
| <i>CsDof96</i> | P-box       | 1864           | 1871          | gibberellin-responsive element                                    |
| <i>CsDof96</i> | GT1-motif   | 1196           | 1202          | light responsive element                                          |
| <i>CsDof96</i> | CCAAT-box   | 1003           | 1009          | MYBHv1 binding site                                               |
| <i>CsDof97</i> | ABRE        | 1380           | 1385          | abscisic acid responsiveness                                      |
| <i>CsDof97</i> | LTR         | 1640           | 1646          | cis-acting element involved in low-temperature responsiveness     |
| <i>CsDof97</i> | G-box       | 1379           | 1385          | cis-acting regulatory element involved in light responsiveness    |
| <i>CsDof97</i> | CGTCA-motif | 1788           | 1793          | cis-acting regulatory element involved in the MeJA-responsiveness |
| <i>CsDof97</i> | TGACG-motif | 1788           | 1793          | cis-acting regulatory element involved in the MeJA-responsiveness |
| <i>CsDof97</i> | CAT-box     | 796            | 802           | cis-acting regulatory element related to meristem expression      |
| <i>CsDof97</i> | CAAT-box    | 53             | 58            | common cis-acting element in promoter and enhancer regions        |

| Name           | Cis-element | Start position | Stop position | Function                                                   |
|----------------|-------------|----------------|---------------|------------------------------------------------------------|
| <i>CsDof97</i> | CAAT-box    | 770            | 775           | common cis-acting element in promoter and enhancer regions |
| <i>CsDof97</i> | CAAT-box    | 837            | 842           | common cis-acting element in promoter and enhancer regions |
| <i>CsDof97</i> | CAAT-box    | 891            | 896           | common cis-acting element in promoter and enhancer regions |
| <i>CsDof97</i> | CAAT-box    | 924            | 929           | common cis-acting element in promoter and enhancer regions |
| <i>CsDof97</i> | CAAT-box    | 979            | 984           | common cis-acting element in promoter and enhancer regions |
| <i>CsDof97</i> | CAAT-box    | 1431           | 1436          | common cis-acting element in promoter and enhancer regions |
| <i>CsDof97</i> | CAAT-box    | 1592           | 1597          | common cis-acting element in promoter and enhancer regions |
| <i>CsDof97</i> | CAAT-box    | 1623           | 1628          | common cis-acting element in promoter and enhancer regions |
| <i>CsDof97</i> | CAAT-box    | 1695           | 1700          | common cis-acting element in promoter and enhancer regions |
| <i>CsDof97</i> | CAAT-box    | 1707           | 1712          | common cis-acting element in promoter and enhancer regions |
| <i>CsDof97</i> | CAAT-box    | 1792           | 1797          | common cis-acting element in promoter and enhancer regions |
| <i>CsDof97</i> | CAAT-box    | 1940           | 1945          | common cis-acting element in promoter and enhancer regions |
| <i>CsDof97</i> | TATA-box    | 2              | 9             | core promoter element around -30 of transcription start    |
| <i>CsDof97</i> | TATA-box    | 133            | 140           | core promoter element around -30 of transcription start    |
| <i>CsDof97</i> | TATA-box    | 134            | 140           | core promoter element around -30 of transcription start    |
| <i>CsDof97</i> | TATA-box    | 136            | 140           | core promoter element around -30 of transcription start    |
| <i>CsDof97</i> | TATA-box    | 748            | 752           | core promoter element around -30 of transcription start    |
| <i>CsDof97</i> | TATA-box    | 805            | 809           | core promoter element around -30 of transcription start    |
| <i>CsDof97</i> | TATA-box    | 850            | 856           | core promoter element around -30 of transcription start    |
| <i>CsDof97</i> | TATA-box    | 851            | 857           | core promoter element around -30 of transcription start    |
| <i>CsDof97</i> | TATA-box    | 853            | 857           | core promoter element around -30 of transcription start    |
| <i>CsDof97</i> | TATA-box    | 915            | 921           | core promoter element around -30 of transcription start    |
| <i>CsDof97</i> | TATA-box    | 916            | 921           | core promoter element around -30 of transcription start    |
| <i>CsDof97</i> | TATA-box    | 917            | 921           | core promoter element around -30 of transcription start    |
| <i>CsDof97</i> | TATA-box    | 928            | 935           | core promoter element around -30 of transcription start    |
| <i>CsDof97</i> | TATA-box    | 1059           | 1066          | core promoter element around -30 of transcription start    |
| <i>CsDof97</i> | TATA-box    | 1060           | 1066          | core promoter element around -30 of transcription start    |
| <i>CsDof97</i> | TATA-box    | 1061           | 1067          | core promoter element around -30 of transcription start    |
| <i>CsDof97</i> | TATA-box    | 1062           | 1066          | core promoter element around -30 of transcription start    |
| <i>CsDof97</i> | TATA-box    | 1072           | 1079          | core promoter element around -30 of transcription start    |
| <i>CsDof97</i> | TATA-box    | 1079           | 1085          | core promoter element around -30 of transcription start    |
| <i>CsDof97</i> | TATA-box    | 1080           | 1084          | core promoter element around -30 of transcription start    |
| <i>CsDof97</i> | TATA-box    | 1132           | 1138          | core promoter element around -30 of transcription start    |
| <i>CsDof97</i> | TATA-box    | 1133           | 1138          | core promoter element around -30 of transcription start    |
| <i>CsDof97</i> | TATA-box    | 1134           | 1138          | core promoter element around -30 of transcription start    |
| <i>CsDof97</i> | TATA-box    | 1203           | 1210          | core promoter element around -30 of transcription start    |
| <i>CsDof97</i> | TATA-box    | 1204           | 1210          | core promoter element around -30 of transcription start    |
| <i>CsDof97</i> | TATA-box    | 1205           | 1210          | core promoter element around -30 of transcription start    |
| <i>CsDof97</i> | TATA-box    | 1206           | 1210          | core promoter element around -30 of transcription start    |
| <i>CsDof97</i> | TATA-box    | 1214           | 1220          | core promoter element around -30 of transcription start    |
| <i>CsDof97</i> | TATA-box    | 1215           | 1221          | core promoter element around -30 of transcription start    |
| <i>CsDof97</i> | TATA-box    | 1217           | 1221          | core promoter element around -30 of transcription start    |
| <i>CsDof97</i> | TATA-box    | 1257           | 1261          | core promoter element around -30 of transcription start    |
| <i>CsDof97</i> | TATA-box    | 1391           | 1397          | core promoter element around -30 of transcription start    |
| <i>CsDof97</i> | TATA-box    | 1393           | 1397          | core promoter element around -30 of transcription start    |
| <i>CsDof97</i> | TATA-box    | 1535           | 1541          | core promoter element around -30 of transcription start    |
| <i>CsDof97</i> | TATA-box    | 1536           | 1540          | core promoter element around -30 of transcription start    |
| <i>CsDof97</i> | TATA-box    | 1571           | 1577          | core promoter element around -30 of transcription start    |
| <i>CsDof97</i> | TATA-box    | 1572           | 1576          | core promoter element around -30 of transcription start    |
| <i>CsDof97</i> | TATA-box    | 1630           | 1636          | core promoter element around -30 of transcription start    |
| <i>CsDof97</i> | TATA-box    | 1631           | 1637          | core promoter element around -30 of transcription start    |



| Name           | Cis-element     | Start position | Stop position | Function                                                             |
|----------------|-----------------|----------------|---------------|----------------------------------------------------------------------|
| <i>CsDof97</i> | TATA-box        | 1633           | 1637          | core promoter element around -30 of transcription start              |
| <i>CsDof97</i> | TATA-box        | 1645           | 1651          | core promoter element around -30 of transcription start              |
| <i>CsDof97</i> | TATA-box        | 1646           | 1650          | core promoter element around -30 of transcription start              |
| <i>CsDof97</i> | TATA-box        | 1764           | 1771          | core promoter element around -30 of transcription start              |
| <i>CsDof97</i> | TATA-box        | 1970           | 1976          | core promoter element around -30 of transcription start              |
| <i>CsDof97</i> | TATA-box        | 1972           | 1976          | core promoter element around -30 of transcription start              |
| <i>CsDof97</i> | HD-Zip 1        | 1587           | 1595          | element involved in differentiation of the palisade mesophyll cells  |
| <i>CsDof97</i> | P-box           | 897            | 904           | gibberellin-responsive element                                       |
| <i>CsDof97</i> | AAAC-motif      | 28             | 39            | light responsive element                                             |
| <i>CsDof97</i> | AAAC-motif      | 954            | 965           | light responsive element                                             |
| <i>CsDof97</i> | GT1-motif       | 1410           | 1417          | light responsive element                                             |
| <i>CsDof97</i> | GT1-motif       | 1411           | 1417          | light responsive element                                             |
| <i>CsDof98</i> | ABRE            | 849            | 854           | abscisic acid responsiveness                                         |
| <i>CsDof98</i> | ABRE            | 1349           | 1354          | abscisic acid responsiveness                                         |
| <i>CsDof98</i> | TC-rich repeats | 1321           | 1330          | cis-acting element involved in defense and stress responsiveness     |
| <i>CsDof98</i> | LTR             | 892            | 898           | cis-acting element involved in low-temperature responsiveness        |
| <i>CsDof98</i> | TCA-element     | 1260           | 1270          | cis-acting element involved in salicylic acid responsiveness         |
| <i>CsDof98</i> | ARE             | 77             | 83            | cis-acting regulatory element essential for the anaerobic induction  |
| <i>CsDof98</i> | ARE             | 604            | 610           | cis-acting regulatory element essential for the anaerobic induction  |
| <i>CsDof98</i> | ARE             | 1509           | 1515          | cis-acting regulatory element essential for the anaerobic induction  |
| <i>CsDof98</i> | ARE             | 1885           | 1891          | cis-acting regulatory element essential for the anaerobic induction  |
| <i>CsDof98</i> | G-box           | 252            | 261           | cis-acting regulatory element involved in light responsiveness       |
| <i>CsDof98</i> | G-box           | 848            | 854           | cis-acting regulatory element involved in light responsiveness       |
| <i>CsDof98</i> | G-box           | 1349           | 1355          | cis-acting regulatory element involved in light responsiveness       |
| <i>CsDof98</i> | TGACG-motif     | 488            | 493           | cis-acting regulatory element involved in the MeJA-responsiveness    |
| <i>CsDof98</i> | TGACG-motif     | 847            | 852           | cis-acting regulatory element involved in the MeJA-responsiveness    |
| <i>CsDof98</i> | CGTCA-motif     | 488            | 493           | cis-acting regulatory element involved in the MeJA-responsiveness    |
| <i>CsDof98</i> | CGTCA-motif     | 847            | 852           | cis-acting regulatory element involved in the MeJA-responsiveness    |
| <i>CsDof98</i> | O2-site         | 514            | 523           | cis-acting regulatory element involved in zein metabolism regulation |
| <i>CsDof98</i> | O2-site         | 845            | 854           | cis-acting regulatory element involved in zein metabolism regulation |
| <i>CsDof98</i> | O2-site         | 1825           | 1834          | cis-acting regulatory element involved in zein metabolism regulation |
| <i>CsDof98</i> | CAAT-box        | 11             | 16            | common cis-acting element in promoter and enhancer regions           |
| <i>CsDof98</i> | CAAT-box        | 160            | 165           | common cis-acting element in promoter and enhancer regions           |
| <i>CsDof98</i> | CAAT-box        | 185            | 190           | common cis-acting element in promoter and enhancer regions           |
| <i>CsDof98</i> | CAAT-box        | 278            | 283           | common cis-acting element in promoter and enhancer regions           |
| <i>CsDof98</i> | CAAT-box        | 304            | 309           | common cis-acting element in promoter and enhancer regions           |
| <i>CsDof98</i> | CAAT-box        | 549            | 554           | common cis-acting element in promoter and enhancer regions           |
| <i>CsDof98</i> | CAAT-box        | 594            | 599           | common cis-acting element in promoter and enhancer regions           |
| <i>CsDof98</i> | CAAT-box        | 962            | 967           | common cis-acting element in promoter and enhancer regions           |
| <i>CsDof98</i> | CAAT-box        | 1141           | 1146          | common cis-acting element in promoter and enhancer regions           |
| <i>CsDof98</i> | CAAT-box        | 1245           | 1250          | common cis-acting element in promoter and enhancer regions           |
| <i>CsDof98</i> | CAAT-box        | 1305           | 1310          | common cis-acting element in promoter and enhancer regions           |
| <i>CsDof98</i> | CAAT-box        | 1334           | 1339          | common cis-acting element in promoter and enhancer regions           |
| <i>CsDof98</i> | CAAT-box        | 1454           | 1459          | common cis-acting element in promoter and enhancer regions           |
| <i>CsDof98</i> | CAAT-box        | 1468           | 1473          | common cis-acting element in promoter and enhancer regions           |
| <i>CsDof98</i> | CAAT-box        | 1512           | 1517          | common cis-acting element in promoter and enhancer regions           |
| <i>CsDof98</i> | CAAT-box        | 1700           | 1705          | common cis-acting element in promoter and enhancer regions           |
| <i>CsDof98</i> | CAAT-box        | 1861           | 1866          | common cis-acting element in promoter and enhancer regions           |
| <i>CsDof98</i> | CAAT-box        | 1868           | 1873          | common cis-acting element in promoter and enhancer regions           |
| <i>CsDof98</i> | CAAT-box        | 1899           | 1904          | common cis-acting element in promoter and enhancer regions           |
| <i>CsDof98</i> | CAAT-box        | 1978           | 1983          | common cis-acting element in promoter and enhancer regions           |

| Name           | Cis-element     | Start position | Stop position | Function                                                            |
|----------------|-----------------|----------------|---------------|---------------------------------------------------------------------|
| <i>CsDof98</i> | TATA-box        | 19             | 25            | core promoter element around -30 of transcription start             |
| <i>CsDof98</i> | TATA-box        | 20             | 24            | core promoter element around -30 of transcription start             |
| <i>CsDof98</i> | TATA-box        | 97             | 104           | core promoter element around -30 of transcription start             |
| <i>CsDof98</i> | TATA-box        | 98             | 104           | core promoter element around -30 of transcription start             |
| <i>CsDof98</i> | TATA-box        | 99             | 104           | core promoter element around -30 of transcription start             |
| <i>CsDof98</i> | TATA-box        | 100            | 104           | core promoter element around -30 of transcription start             |
| <i>CsDof98</i> | TATA-box        | 116            | 120           | core promoter element around -30 of transcription start             |
| <i>CsDof98</i> | TATA-box        | 129            | 135           | core promoter element around -30 of transcription start             |
| <i>CsDof98</i> | TATA-box        | 130            | 136           | core promoter element around -30 of transcription start             |
| <i>CsDof98</i> | TATA-box        | 131            | 135           | core promoter element around -30 of transcription start             |
| <i>CsDof98</i> | TATA-box        | 169            | 173           | core promoter element around -30 of transcription start             |
| <i>CsDof98</i> | TATA-box        | 200            | 204           | core promoter element around -30 of transcription start             |
| <i>CsDof98</i> | TATA-box        | 212            | 219           | core promoter element around -30 of transcription start             |
| <i>CsDof98</i> | TATA-box        | 471            | 477           | core promoter element around -30 of transcription start             |
| <i>CsDof98</i> | TATA-box        | 473            | 477           | core promoter element around -30 of transcription start             |
| <i>CsDof98</i> | TATA-box        | 499            | 503           | core promoter element around -30 of transcription start             |
| <i>CsDof98</i> | TATA-box        | 573            | 581           | core promoter element around -30 of transcription start             |
| <i>CsDof98</i> | TATA-box        | 956            | 961           | core promoter element around -30 of transcription start             |
| <i>CsDof98</i> | TATA-box        | 957            | 961           | core promoter element around -30 of transcription start             |
| <i>CsDof98</i> | TATA-box        | 1057           | 1061          | core promoter element around -30 of transcription start             |
| <i>CsDof98</i> | TATA-box        | 1067           | 1072          | core promoter element around -30 of transcription start             |
| <i>CsDof98</i> | TATA-box        | 1068           | 1072          | core promoter element around -30 of transcription start             |
| <i>CsDof98</i> | TATA-box        | 1088           | 1096          | core promoter element around -30 of transcription start             |
| <i>CsDof98</i> | TATA-box        | 1090           | 1099          | core promoter element around -30 of transcription start             |
| <i>CsDof98</i> | TATA-box        | 1197           | 1201          | core promoter element around -30 of transcription start             |
| <i>CsDof98</i> | TATA-box        | 1498           | 1503          | core promoter element around -30 of transcription start             |
| <i>CsDof98</i> | TATA-box        | 1499           | 1503          | core promoter element around -30 of transcription start             |
| <i>CsDof98</i> | TATA-box        | 1503           | 1509          | core promoter element around -30 of transcription start             |
| <i>CsDof98</i> | TATA-box        | 1504           | 1509          | core promoter element around -30 of transcription start             |
| <i>CsDof98</i> | TATA-box        | 1505           | 1509          | core promoter element around -30 of transcription start             |
| <i>CsDof98</i> | TATA-box        | 1525           | 1531          | core promoter element around -30 of transcription start             |
| <i>CsDof98</i> | TATA-box        | 1526           | 1530          | core promoter element around -30 of transcription start             |
| <i>CsDof98</i> | TATA-box        | 1540           | 1546          | core promoter element around -30 of transcription start             |
| <i>CsDof98</i> | TATA-box        | 1541           | 1546          | core promoter element around -30 of transcription start             |
| <i>CsDof98</i> | TATA-box        | 1542           | 1546          | core promoter element around -30 of transcription start             |
| <i>CsDof98</i> | TATA-box        | 1671           | 1677          | core promoter element around -30 of transcription start             |
| <i>CsDof98</i> | TATA-box        | 1672           | 1678          | core promoter element around -30 of transcription start             |
| <i>CsDof98</i> | TATA-box        | 1673           | 1677          | core promoter element around -30 of transcription start             |
| <i>CsDof98</i> | TATA-box        | 1743           | 1749          | core promoter element around -30 of transcription start             |
| <i>CsDof98</i> | TATA-box        | 1744           | 1749          | core promoter element around -30 of transcription start             |
| <i>CsDof98</i> | TATA-box        | 1745           | 1749          | core promoter element around -30 of transcription start             |
| <i>CsDof98</i> | TATA-box        | 1752           | 1756          | core promoter element around -30 of transcription start             |
| <i>CsDof98</i> | MRE             | 142            | 149           | MYB binding site involved in light responsiveness                   |
| <i>CsDof98</i> | CCAAT-box       | 1032           | 1038          | MYBHv1 binding site                                                 |
| <i>CsDof98</i> | CCAAT-box       | 1638           | 1644          | MYBHv1 binding site                                                 |
| <i>CsDof99</i> | ABRE            | 996            | 1005          | abscisic acid responsiveness                                        |
| <i>CsDof99</i> | MSA-like        | 1278           | 1287          | cis-acting element involved in cell cycle regulation                |
| <i>CsDof99</i> | TC-rich repeats | 985            | 994           | cis-acting element involved in defense and stress responsiveness    |
| <i>CsDof99</i> | ARE             | 898            | 904           | cis-acting regulatory element essential for the anaerobic induction |
| <i>CsDof99</i> | ARE             | 947            | 953           | cis-acting regulatory element essential for the anaerobic induction |
| <i>CsDof99</i> | ARE             | 1728           | 1734          | cis-acting regulatory element essential for the anaerobic induction |

| Name           | Cis-element | Start position | Stop position | Function                                                             |
|----------------|-------------|----------------|---------------|----------------------------------------------------------------------|
| <i>CsDof99</i> | G-box       | 995            | 1006          | cis-acting regulatory element involved in light responsiveness       |
| <i>CsDof99</i> | CGTCA-motif | 120            | 125           | cis-acting regulatory element involved in the MeJA-responsiveness    |
| <i>CsDof99</i> | CGTCA-motif | 324            | 329           | cis-acting regulatory element involved in the MeJA-responsiveness    |
| <i>CsDof99</i> | CGTCA-motif | 1203           | 1208          | cis-acting regulatory element involved in the MeJA-responsiveness    |
| <i>CsDof99</i> | CGTCA-motif | 1312           | 1317          | cis-acting regulatory element involved in the MeJA-responsiveness    |
| <i>CsDof99</i> | TGACG-motif | 120            | 125           | cis-acting regulatory element involved in the MeJA-responsiveness    |
| <i>CsDof99</i> | TGACG-motif | 324            | 329           | cis-acting regulatory element involved in the MeJA-responsiveness    |
| <i>CsDof99</i> | TGACG-motif | 1203           | 1208          | cis-acting regulatory element involved in the MeJA-responsiveness    |
| <i>CsDof99</i> | TGACG-motif | 1312           | 1317          | cis-acting regulatory element involved in the MeJA-responsiveness    |
| <i>CsDof99</i> | O2-site     | 1296           | 1305          | cis-acting regulatory element involved in zein metabolism regulation |
| <i>CsDof99</i> | CAAT-box    | 189            | 194           | common cis-acting element in promoter and enhancer regions           |
| <i>CsDof99</i> | CAAT-box    | 467            | 472           | common cis-acting element in promoter and enhancer regions           |
| <i>CsDof99</i> | CAAT-box    | 654            | 659           | common cis-acting element in promoter and enhancer regions           |
| <i>CsDof99</i> | CAAT-box    | 688            | 693           | common cis-acting element in promoter and enhancer regions           |
| <i>CsDof99</i> | CAAT-box    | 1286           | 1291          | common cis-acting element in promoter and enhancer regions           |
| <i>CsDof99</i> | CAAT-box    | 1300           | 1305          | common cis-acting element in promoter and enhancer regions           |
| <i>CsDof99</i> | CAAT-box    | 1433           | 1438          | common cis-acting element in promoter and enhancer regions           |
| <i>CsDof99</i> | CAAT-box    | 1527           | 1532          | common cis-acting element in promoter and enhancer regions           |
| <i>CsDof99</i> | CAAT-box    | 1941           | 1946          | common cis-acting element in promoter and enhancer regions           |
| <i>CsDof99</i> | TATA-box    | 153            | 160           | core promoter element around -30 of transcription start              |
| <i>CsDof99</i> | TATA-box    | 154            | 160           | core promoter element around -30 of transcription start              |
| <i>CsDof99</i> | TATA-box    | 155            | 160           | core promoter element around -30 of transcription start              |
| <i>CsDof99</i> | TATA-box    | 156            | 160           | core promoter element around -30 of transcription start              |
| <i>CsDof99</i> | TATA-box    | 211            | 218           | core promoter element around -30 of transcription start              |
| <i>CsDof99</i> | TATA-box    | 212            | 218           | core promoter element around -30 of transcription start              |
| <i>CsDof99</i> | TATA-box    | 213            | 218           | core promoter element around -30 of transcription start              |
| <i>CsDof99</i> | TATA-box    | 214            | 218           | core promoter element around -30 of transcription start              |
| <i>CsDof99</i> | TATA-box    | 448            | 454           | core promoter element around -30 of transcription start              |
| <i>CsDof99</i> | TATA-box    | 449            | 453           | core promoter element around -30 of transcription start              |
| <i>CsDof99</i> | TATA-box    | 452            | 458           | core promoter element around -30 of transcription start              |
| <i>CsDof99</i> | TATA-box    | 453            | 458           | core promoter element around -30 of transcription start              |
| <i>CsDof99</i> | TATA-box    | 454            | 458           | core promoter element around -30 of transcription start              |
| <i>CsDof99</i> | TATA-box    | 540            | 546           | core promoter element around -30 of transcription start              |
| <i>CsDof99</i> | TATA-box    | 541            | 547           | core promoter element around -30 of transcription start              |
| <i>CsDof99</i> | TATA-box    | 542            | 548           | core promoter element around -30 of transcription start              |
| <i>CsDof99</i> | TATA-box    | 544            | 548           | core promoter element around -30 of transcription start              |
| <i>CsDof99</i> | TATA-box    | 732            | 739           | core promoter element around -30 of transcription start              |
| <i>CsDof99</i> | TATA-box    | 733            | 739           | core promoter element around -30 of transcription start              |
| <i>CsDof99</i> | TATA-box    | 734            | 739           | core promoter element around -30 of transcription start              |
| <i>CsDof99</i> | TATA-box    | 735            | 739           | core promoter element around -30 of transcription start              |
| <i>CsDof99</i> | TATA-box    | 824            | 830           | core promoter element around -30 of transcription start              |
| <i>CsDof99</i> | TATA-box    | 825            | 829           | core promoter element around -30 of transcription start              |
| <i>CsDof99</i> | TATA-box    | 827            | 835           | core promoter element around -30 of transcription start              |
| <i>CsDof99</i> | TATA-box    | 872            | 880           | core promoter element around -30 of transcription start              |
| <i>CsDof99</i> | TATA-box    | 878            | 882           | core promoter element around -30 of transcription start              |
| <i>CsDof99</i> | TATA-box    | 968            | 974           | core promoter element around -30 of transcription start              |
| <i>CsDof99</i> | TATA-box    | 969            | 974           | core promoter element around -30 of transcription start              |
| <i>CsDof99</i> | TATA-box    | 970            | 974           | core promoter element around -30 of transcription start              |
| <i>CsDof99</i> | TATA-box    | 1400           | 1404          | core promoter element around -30 of transcription start              |
| <i>CsDof99</i> | TATA-box    | 1407           | 1412          | core promoter element around -30 of transcription start              |
| <i>CsDof99</i> | TATA-box    | 1408           | 1412          | core promoter element around -30 of transcription start              |

| Name            | Cis-element      | Start position | Stop position | Function                                                             |
|-----------------|------------------|----------------|---------------|----------------------------------------------------------------------|
| <i>CsDof99</i>  | TATA-box         | 1637           | 1641          | core promoter element around -30 of transcription start              |
| <i>CsDof99</i>  | TATA-box         | 1697           | 1703          | core promoter element around -30 of transcription start              |
| <i>CsDof99</i>  | TATA-box         | 1698           | 1702          | core promoter element around -30 of transcription start              |
| <i>CsDof99</i>  | TATA-box         | 1742           | 1748          | core promoter element around -30 of transcription start              |
| <i>CsDof99</i>  | TATA-box         | 1743           | 1748          | core promoter element around -30 of transcription start              |
| <i>CsDof99</i>  | TATA-box         | 1744           | 1748          | core promoter element around -30 of transcription start              |
| <i>CsDof99</i>  | TATA-box         | 1753           | 1762          | core promoter element around -30 of transcription start              |
| <i>CsDof99</i>  | TATA-box         | 1754           | 1761          | core promoter element around -30 of transcription start              |
| <i>CsDof99</i>  | TATA-box         | 1755           | 1761          | core promoter element around -30 of transcription start              |
| <i>CsDof99</i>  | TATA-box         | 1756           | 1763          | core promoter element around -30 of transcription start              |
| <i>CsDof99</i>  | TATA-box         | 1757           | 1763          | core promoter element around -30 of transcription start              |
| <i>CsDof99</i>  | TATA-box         | 1758           | 1764          | core promoter element around -30 of transcription start              |
| <i>CsDof99</i>  | TATA-box         | 1759           | 1765          | core promoter element around -30 of transcription start              |
| <i>CsDof99</i>  | TATA-box         | 1760           | 1766          | core promoter element around -30 of transcription start              |
| <i>CsDof99</i>  | TATA-box         | 1761           | 1765          | core promoter element around -30 of transcription start              |
| <i>CsDof99</i>  | TATA-box         | 1886           | 1891          | core promoter element around -30 of transcription start              |
| <i>CsDof99</i>  | TATA-box         | 1887           | 1891          | core promoter element around -30 of transcription start              |
| <i>CsDof99</i>  | AT-rich sequence | 149            | 158           | element for maximal elicitor-mediated activation (2copies)           |
| <i>CsDof99</i>  | GARE-motif       | 1194           | 1201          | gibberellin-responsive element                                       |
| <i>CsDof99</i>  | CCAAT-box        | 1279           | 1285          | MYBHv1 binding site                                                  |
| <i>CsDof99</i>  | HD-Zip 3         | 263            | 272.5         | protein binding site                                                 |
| <i>CsDof100</i> | TCA-element      | 97             | 106           | cis-acting element involved in salicylic acid responsiveness         |
| <i>CsDof100</i> | TCA-element      | 609            | 618           | cis-acting element involved in salicylic acid responsiveness         |
| <i>CsDof100</i> | TCA-element      | 1198           | 1207          | cis-acting element involved in salicylic acid responsiveness         |
| <i>CsDof100</i> | ARE              | 556            | 562           | cis-acting regulatory element essential for the anaerobic induction  |
| <i>CsDof100</i> | ARE              | 1068           | 1074          | cis-acting regulatory element essential for the anaerobic induction  |
| <i>CsDof100</i> | TGACG-motif      | 399            | 404           | cis-acting regulatory element involved in the MeJA-responsiveness    |
| <i>CsDof100</i> | TGACG-motif      | 911            | 916           | cis-acting regulatory element involved in the MeJA-responsiveness    |
| <i>CsDof100</i> | CGTCA-motif      | 399            | 404           | cis-acting regulatory element involved in the MeJA-responsiveness    |
| <i>CsDof100</i> | CGTCA-motif      | 911            | 916           | cis-acting regulatory element involved in the MeJA-responsiveness    |
| <i>CsDof100</i> | O2-site          | 1985           | 1994          | cis-acting regulatory element involved in zein metabolism regulation |
| <i>CsDof100</i> | CAT-box          | 1335           | 1341          | cis-acting regulatory element related to meristem expression         |
| <i>CsDof100</i> | CAT-box          | 1490           | 1496          | cis-acting regulatory element related to meristem expression         |
| <i>CsDof100</i> | CAAT-box         | 133            | 138           | common cis-acting element in promoter and enhancer regions           |
| <i>CsDof100</i> | CAAT-box         | 153            | 158           | common cis-acting element in promoter and enhancer regions           |
| <i>CsDof100</i> | CAAT-box         | 167            | 172           | common cis-acting element in promoter and enhancer regions           |
| <i>CsDof100</i> | CAAT-box         | 190            | 195           | common cis-acting element in promoter and enhancer regions           |
| <i>CsDof100</i> | CAAT-box         | 323            | 328           | common cis-acting element in promoter and enhancer regions           |
| <i>CsDof100</i> | CAAT-box         | 373            | 378           | common cis-acting element in promoter and enhancer regions           |
| <i>CsDof100</i> | CAAT-box         | 404            | 409           | common cis-acting element in promoter and enhancer regions           |
| <i>CsDof100</i> | CAAT-box         | 546            | 551           | common cis-acting element in promoter and enhancer regions           |
| <i>CsDof100</i> | CAAT-box         | 645            | 650           | common cis-acting element in promoter and enhancer regions           |
| <i>CsDof100</i> | CAAT-box         | 665            | 670           | common cis-acting element in promoter and enhancer regions           |
| <i>CsDof100</i> | CAAT-box         | 679            | 684           | common cis-acting element in promoter and enhancer regions           |
| <i>CsDof100</i> | CAAT-box         | 702            | 707           | common cis-acting element in promoter and enhancer regions           |
| <i>CsDof100</i> | CAAT-box         | 835            | 840           | common cis-acting element in promoter and enhancer regions           |
| <i>CsDof100</i> | CAAT-box         | 885            | 890           | common cis-acting element in promoter and enhancer regions           |
| <i>CsDof100</i> | CAAT-box         | 916            | 921           | common cis-acting element in promoter and enhancer regions           |
| <i>CsDof100</i> | CAAT-box         | 1058           | 1063          | common cis-acting element in promoter and enhancer regions           |
| <i>CsDof100</i> | CAAT-box         | 1274           | 1279          | common cis-acting element in promoter and enhancer regions           |
| <i>CsDof100</i> | CAAT-box         | 1287           | 1292          | common cis-acting element in promoter and enhancer regions           |

| <b>Name</b>     | <b>Cis-element</b> | <b>Start position</b> | <b>Stop position</b> | <b>Function</b>                                            |
|-----------------|--------------------|-----------------------|----------------------|------------------------------------------------------------|
| <i>CsDof100</i> | CAAT-box           | 1579                  | 1584                 | common cis-acting element in promoter and enhancer regions |
| <i>CsDof100</i> | TATA-box           | 60                    | 66                   | core promoter element around -30 of transcription start    |
| <i>CsDof100</i> | TATA-box           | 61                    | 65                   | core promoter element around -30 of transcription start    |
| <i>CsDof100</i> | TATA-box           | 106                   | 113                  | core promoter element around -30 of transcription start    |
| <i>CsDof100</i> | TATA-box           | 107                   | 113                  | core promoter element around -30 of transcription start    |
| <i>CsDof100</i> | TATA-box           | 108                   | 113                  | core promoter element around -30 of transcription start    |
| <i>CsDof100</i> | TATA-box           | 109                   | 113                  | core promoter element around -30 of transcription start    |
| <i>CsDof100</i> | TATA-box           | 113                   | 120                  | core promoter element around -30 of transcription start    |
| <i>CsDof100</i> | TATA-box           | 114                   | 120                  | core promoter element around -30 of transcription start    |
| <i>CsDof100</i> | TATA-box           | 115                   | 120                  | core promoter element around -30 of transcription start    |
| <i>CsDof100</i> | TATA-box           | 116                   | 120                  | core promoter element around -30 of transcription start    |
| <i>CsDof100</i> | TATA-box           | 211                   | 215                  | core promoter element around -30 of transcription start    |
| <i>CsDof100</i> | TATA-box           | 224                   | 230                  | core promoter element around -30 of transcription start    |
| <i>CsDof100</i> | TATA-box           | 225                   | 231                  | core promoter element around -30 of transcription start    |
| <i>CsDof100</i> | TATA-box           | 226                   | 230                  | core promoter element around -30 of transcription start    |
| <i>CsDof100</i> | TATA-box           | 314                   | 321                  | core promoter element around -30 of transcription start    |
| <i>CsDof100</i> | TATA-box           | 330                   | 336                  | core promoter element around -30 of transcription start    |
| <i>CsDof100</i> | TATA-box           | 331                   | 336                  | core promoter element around -30 of transcription start    |
| <i>CsDof100</i> | TATA-box           | 332                   | 336                  | core promoter element around -30 of transcription start    |
| <i>CsDof100</i> | TATA-box           | 343                   | 348                  | core promoter element around -30 of transcription start    |
| <i>CsDof100</i> | TATA-box           | 344                   | 348                  | core promoter element around -30 of transcription start    |
| <i>CsDof100</i> | TATA-box           | 379                   | 386                  | core promoter element around -30 of transcription start    |
| <i>CsDof100</i> | TATA-box           | 380                   | 386                  | core promoter element around -30 of transcription start    |
| <i>CsDof100</i> | TATA-box           | 381                   | 386                  | core promoter element around -30 of transcription start    |
| <i>CsDof100</i> | TATA-box           | 382                   | 386                  | core promoter element around -30 of transcription start    |
| <i>CsDof100</i> | TATA-box           | 390                   | 396                  | core promoter element around -30 of transcription start    |
| <i>CsDof100</i> | TATA-box           | 391                   | 397                  | core promoter element around -30 of transcription start    |
| <i>CsDof100</i> | TATA-box           | 392                   | 398                  | core promoter element around -30 of transcription start    |
| <i>CsDof100</i> | TATA-box           | 393                   | 399                  | core promoter element around -30 of transcription start    |
| <i>CsDof100</i> | TATA-box           | 394                   | 398                  | core promoter element around -30 of transcription start    |
| <i>CsDof100</i> | TATA-box           | 414                   | 420                  | core promoter element around -30 of transcription start    |
| <i>CsDof100</i> | TATA-box           | 415                   | 419                  | core promoter element around -30 of transcription start    |
| <i>CsDof100</i> | TATA-box           | 532                   | 538                  | core promoter element around -30 of transcription start    |
| <i>CsDof100</i> | TATA-box           | 533                   | 537                  | core promoter element around -30 of transcription start    |
| <i>CsDof100</i> | TATA-box           | 591                   | 597                  | core promoter element around -30 of transcription start    |
| <i>CsDof100</i> | TATA-box           | 592                   | 598                  | core promoter element around -30 of transcription start    |
| <i>CsDof100</i> | TATA-box           | 593                   | 597                  | core promoter element around -30 of transcription start    |
| <i>CsDof100</i> | TATA-box           | 618                   | 625                  | core promoter element around -30 of transcription start    |
| <i>CsDof100</i> | TATA-box           | 619                   | 625                  | core promoter element around -30 of transcription start    |
| <i>CsDof100</i> | TATA-box           | 620                   | 625                  | core promoter element around -30 of transcription start    |
| <i>CsDof100</i> | TATA-box           | 621                   | 625                  | core promoter element around -30 of transcription start    |
| <i>CsDof100</i> | TATA-box           | 625                   | 632                  | core promoter element around -30 of transcription start    |
| <i>CsDof100</i> | TATA-box           | 626                   | 632                  | core promoter element around -30 of transcription start    |
| <i>CsDof100</i> | TATA-box           | 627                   | 632                  | core promoter element around -30 of transcription start    |
| <i>CsDof100</i> | TATA-box           | 628                   | 632                  | core promoter element around -30 of transcription start    |
| <i>CsDof100</i> | TATA-box           | 723                   | 727                  | core promoter element around -30 of transcription start    |
| <i>CsDof100</i> | TATA-box           | 736                   | 742                  | core promoter element around -30 of transcription start    |
| <i>CsDof100</i> | TATA-box           | 737                   | 743                  | core promoter element around -30 of transcription start    |
| <i>CsDof100</i> | TATA-box           | 738                   | 742                  | core promoter element around -30 of transcription start    |
| <i>CsDof100</i> | TATA-box           | 826                   | 833                  | core promoter element around -30 of transcription start    |
| <i>CsDof100</i> | TATA-box           | 842                   | 848                  | core promoter element around -30 of transcription start    |



| Name            | Cis-element | Start position | Stop position | Function                                                            |
|-----------------|-------------|----------------|---------------|---------------------------------------------------------------------|
| <i>CsDof100</i> | TATA-box    | 1425           | 1431          | core promoter element around -30 of transcription start             |
| <i>CsDof100</i> | TATA-box    | 1426           | 1430          | core promoter element around -30 of transcription start             |
| <i>CsDof100</i> | TATA-box    | 1607           | 1611          | core promoter element around -30 of transcription start             |
| <i>CsDof100</i> | TATA-box    | 1681           | 1687          | core promoter element around -30 of transcription start             |
| <i>CsDof100</i> | TATA-box    | 1682           | 1686          | core promoter element around -30 of transcription start             |
| <i>CsDof100</i> | TATA-box    | 1702           | 1708          | core promoter element around -30 of transcription start             |
| <i>CsDof100</i> | TATA-box    | 1703           | 1709          | core promoter element around -30 of transcription start             |
| <i>CsDof100</i> | TATA-box    | 1705           | 1709          | core promoter element around -30 of transcription start             |
| <i>CsDof100</i> | TATA-box    | 1730           | 1738          | core promoter element around -30 of transcription start             |
| <i>CsDof100</i> | TATA-box    | 1735           | 1741          | core promoter element around -30 of transcription start             |
| <i>CsDof100</i> | TATA-box    | 1736           | 1742          | core promoter element around -30 of transcription start             |
| <i>CsDof100</i> | TATA-box    | 1737           | 1743          | core promoter element around -30 of transcription start             |
| <i>CsDof100</i> | TATA-box    | 1738           | 1742          | core promoter element around -30 of transcription start             |
| <i>CsDof100</i> | TATA-box    | 1771           | 1777          | core promoter element around -30 of transcription start             |
| <i>CsDof100</i> | TATA-box    | 1772           | 1778          | core promoter element around -30 of transcription start             |
| <i>CsDof100</i> | TATA-box    | 1773           | 1777          | core promoter element around -30 of transcription start             |
| <i>CsDof100</i> | TATA-box    | 1784           | 1788          | core promoter element around -30 of transcription start             |
| <i>CsDof100</i> | TATA-box    | 1789           | 1795          | core promoter element around -30 of transcription start             |
| <i>CsDof100</i> | TATA-box    | 1790           | 1794          | core promoter element around -30 of transcription start             |
| <i>CsDof100</i> | TATA-box    | 1801           | 1807          | core promoter element around -30 of transcription start             |
| <i>CsDof100</i> | TATA-box    | 1802           | 1808          | core promoter element around -30 of transcription start             |
| <i>CsDof100</i> | TATA-box    | 1803           | 1809          | core promoter element around -30 of transcription start             |
| <i>CsDof100</i> | TATA-box    | 1804           | 1810          | core promoter element around -30 of transcription start             |
| <i>CsDof100</i> | TATA-box    | 1805           | 1811          | core promoter element around -30 of transcription start             |
| <i>CsDof100</i> | TATA-box    | 1806           | 1810          | core promoter element around -30 of transcription start             |
| <i>CsDof100</i> | TATA-box    | 1816           | 1825          | core promoter element around -30 of transcription start             |
| <i>CsDof100</i> | TATA-box    | 1817           | 1824          | core promoter element around -30 of transcription start             |
| <i>CsDof100</i> | TATA-box    | 1818           | 1824          | core promoter element around -30 of transcription start             |
| <i>CsDof100</i> | TATA-box    | 1819           | 1826          | core promoter element around -30 of transcription start             |
| <i>CsDof100</i> | TATA-box    | 1820           | 1826          | core promoter element around -30 of transcription start             |
| <i>CsDof100</i> | TATA-box    | 1821           | 1827          | core promoter element around -30 of transcription start             |
| <i>CsDof100</i> | TATA-box    | 1822           | 1828          | core promoter element around -30 of transcription start             |
| <i>CsDof100</i> | TATA-box    | 1823           | 1829          | core promoter element around -30 of transcription start             |
| <i>CsDof100</i> | TATA-box    | 1824           | 1828          | core promoter element around -30 of transcription start             |
| <i>CsDof100</i> | TATA-box    | 1834           | 1838          | core promoter element around -30 of transcription start             |
| <i>CsDof100</i> | GARE-motif  | 1566           | 1573          | gibberellin-responsive element                                      |
| <i>CsDof100</i> | MBS         | 1518           | 1524          | MYB binding site involved in drought-inducibility                   |
| <i>CsDof101</i> | ABRE        | 603            | 608           | abscisic acid responsiveness                                        |
| <i>CsDof101</i> | ABRE        | 1097           | 1102          | abscisic acid responsiveness                                        |
| <i>CsDof101</i> | ABRE        | 1453           | 1461          | abscisic acid responsiveness                                        |
| <i>CsDof101</i> | ABRE        | 1455           | 1460          | abscisic acid responsiveness                                        |
| <i>CsDof101</i> | ABRE        | 1686           | 1691          | abscisic acid responsiveness                                        |
| <i>CsDof101</i> | TATC-box    | 515            | 522           | cis-acting element involved in gibberellin-responsiveness           |
| <i>CsDof101</i> | TCA-element | 1275           | 1284          | cis-acting element involved in salicylic acid responsiveness        |
| <i>CsDof101</i> | A-box       | 429            | 435           | cis-acting regulatory element                                       |
| <i>CsDof101</i> | A-box       | 580            | 586           | cis-acting regulatory element                                       |
| <i>CsDof101</i> | ARE         | 13             | 19            | cis-acting regulatory element essential for the anaerobic induction |
| <i>CsDof101</i> | AuxRR-core  | 1238           | 1245          | cis-acting regulatory element involved in auxin responsiveness      |
| <i>CsDof101</i> | G-box       | 603            | 609           | cis-acting regulatory element involved in light responsiveness      |
| <i>CsDof101</i> | G-box       | 1094           | 1103          | cis-acting regulatory element involved in light responsiveness      |
| <i>CsDof101</i> | G-box       | 1097           | 1103          | cis-acting regulatory element involved in light responsiveness      |

| Name            | Cis-element | Start position | Stop position | Function                                                             |
|-----------------|-------------|----------------|---------------|----------------------------------------------------------------------|
| <i>CsDof101</i> | G-box       | 1455           | 1461          | cis-acting regulatory element involved in light responsiveness       |
| <i>CsDof101</i> | G-Box       | 1685           | 1691          | cis-acting regulatory element involved in light responsiveness       |
| <i>CsDof101</i> | CGTCA-motif | 438            | 443           | cis-acting regulatory element involved in the MeJA-responsiveness    |
| <i>CsDof101</i> | TGACG-motif | 438            | 443           | cis-acting regulatory element involved in the MeJA-responsiveness    |
| <i>CsDof101</i> | O2-site     | 1501           | 1510          | cis-acting regulatory element involved in zein metabolism regulation |
| <i>CsDof101</i> | CAAT-box    | 355            | 360           | common cis-acting element in promoter and enhancer regions           |
| <i>CsDof101</i> | CAAT-box    | 363            | 368           | common cis-acting element in promoter and enhancer regions           |
| <i>CsDof101</i> | CAAT-box    | 543            | 548           | common cis-acting element in promoter and enhancer regions           |
| <i>CsDof101</i> | CAAT-box    | 646            | 651           | common cis-acting element in promoter and enhancer regions           |
| <i>CsDof101</i> | CAAT-box    | 683            | 692           | common cis-acting element in promoter and enhancer regions           |
| <i>CsDof101</i> | CAAT-box    | 685            | 690           | common cis-acting element in promoter and enhancer regions           |
| <i>CsDof101</i> | CAAT-box    | 836            | 841           | common cis-acting element in promoter and enhancer regions           |
| <i>CsDof101</i> | CAAT-box    | 885            | 890           | common cis-acting element in promoter and enhancer regions           |
| <i>CsDof101</i> | CAAT-box    | 1063           | 1068          | common cis-acting element in promoter and enhancer regions           |
| <i>CsDof101</i> | CAAT-box    | 1142           | 1147          | common cis-acting element in promoter and enhancer regions           |
| <i>CsDof101</i> | CAAT-box    | 1371           | 1376          | common cis-acting element in promoter and enhancer regions           |
| <i>CsDof101</i> | CAAT-box    | 1409           | 1414          | common cis-acting element in promoter and enhancer regions           |
| <i>CsDof101</i> | CAAT-box    | 1592           | 1597          | common cis-acting element in promoter and enhancer regions           |
| <i>CsDof101</i> | CAAT-box    | 1637           | 1642          | common cis-acting element in promoter and enhancer regions           |
| <i>CsDof101</i> | TATA-box    | 41             | 46            | core promoter element around -30 of transcription start              |
| <i>CsDof101</i> | TATA-box    | 42             | 46            | core promoter element around -30 of transcription start              |
| <i>CsDof101</i> | TATA-box    | 113            | 119           | core promoter element around -30 of transcription start              |
| <i>CsDof101</i> | TATA-box    | 114            | 118           | core promoter element around -30 of transcription start              |
| <i>CsDof101</i> | TATA-box    | 343            | 350           | core promoter element around -30 of transcription start              |
| <i>CsDof101</i> | TATA-box    | 382            | 386           | core promoter element around -30 of transcription start              |
| <i>CsDof101</i> | TATA-box    | 992            | 1001          | core promoter element around -30 of transcription start              |
| <i>CsDof101</i> | TATA-box    | 993            | 1000          | core promoter element around -30 of transcription start              |
| <i>CsDof101</i> | TATA-box    | 994            | 1000          | core promoter element around -30 of transcription start              |
| <i>CsDof101</i> | TATA-box    | 995            | 1000          | core promoter element around -30 of transcription start              |
| <i>CsDof101</i> | TATA-box    | 996            | 1000          | core promoter element around -30 of transcription start              |
| <i>CsDof101</i> | TATA-box    | 1020           | 1026          | core promoter element around -30 of transcription start              |
| <i>CsDof101</i> | TATA-box    | 1021           | 1026          | core promoter element around -30 of transcription start              |
| <i>CsDof101</i> | TATA-box    | 1022           | 1026          | core promoter element around -30 of transcription start              |
| <i>CsDof101</i> | TATA-box    | 1071           | 1078          | core promoter element around -30 of transcription start              |
| <i>CsDof101</i> | TATA-box    | 1072           | 1078          | core promoter element around -30 of transcription start              |
| <i>CsDof101</i> | TATA-box    | 1073           | 1078          | core promoter element around -30 of transcription start              |
| <i>CsDof101</i> | TATA-box    | 1074           | 1078          | core promoter element around -30 of transcription start              |
| <i>CsDof101</i> | TATA-box    | 1193           | 1197          | core promoter element around -30 of transcription start              |
| <i>CsDof101</i> | TATA-box    | 1325           | 1330          | core promoter element around -30 of transcription start              |
| <i>CsDof101</i> | TATA-box    | 1326           | 1330          | core promoter element around -30 of transcription start              |
| <i>CsDof101</i> | TATA-box    | 1356           | 1360          | core promoter element around -30 of transcription start              |
| <i>CsDof101</i> | TATA-box    | 1669           | 1674          | core promoter element around -30 of transcription start              |
| <i>CsDof101</i> | TATA-box    | 1670           | 1674          | core promoter element around -30 of transcription start              |
| <i>CsDof101</i> | TATA-box    | 1769           | 1773          | core promoter element around -30 of transcription start              |
| <i>CsDof101</i> | TATA-box    | 1896           | 1902          | core promoter element around -30 of transcription start              |
| <i>CsDof101</i> | TATA-box    | 1897           | 1901          | core promoter element around -30 of transcription start              |
| <i>CsDof101</i> | GARE-motif  | 569            | 576           | gibberellin-responsive element                                       |
| <i>CsDof101</i> | GT1-motif   | 1216           | 1225          | light responsive element                                             |
| <i>CsDof102</i> | ABRE        | 118            | 123           | abscisic acid responsiveness                                         |
| <i>CsDof102</i> | ABRE        | 344            | 350           | abscisic acid responsiveness                                         |
| <i>CsDof102</i> | ABRE        | 345            | 350           | abscisic acid responsiveness                                         |



| Name            | Cis-element     | Start position | Stop position | Function                                                            |
|-----------------|-----------------|----------------|---------------|---------------------------------------------------------------------|
| <i>CsDof102</i> | ABRE            | 787            | 792           | abscisic acid responsiveness                                        |
| <i>CsDof102</i> | TGA-element     | 1800           | 1806          | auxin-responsive element                                            |
| <i>CsDof102</i> | AT-rich element | 1243           | 1253          | binding site of AT-rich DNA binding protein (ATBP-1)                |
| <i>CsDof102</i> | TCA-element     | 650            | 659           | cis-acting element involved in salicylic acid responsiveness        |
| <i>CsDof102</i> | A-box           | 255            | 261           | cis-acting regulatory element                                       |
| <i>CsDof102</i> | A-box           | 443            | 449           | cis-acting regulatory element                                       |
| <i>CsDof102</i> | ARE             | 1095           | 1101          | cis-acting regulatory element essential for the anaerobic induction |
| <i>CsDof102</i> | ARE             | 1300           | 1306          | cis-acting regulatory element essential for the anaerobic induction |
| <i>CsDof102</i> | ARE             | 1384           | 1390          | cis-acting regulatory element essential for the anaerobic induction |
| <i>CsDof102</i> | G-box           | 344            | 350           | cis-acting regulatory element involved in light responsiveness      |
| <i>CsDof102</i> | G-box           | 786            | 792           | cis-acting regulatory element involved in light responsiveness      |
| <i>CsDof102</i> | G-Box           | 118            | 124           | cis-acting regulatory element involved in light responsiveness      |
| <i>CsDof102</i> | G-Box           | 344            | 350           | cis-acting regulatory element involved in light responsiveness      |
| <i>CsDof102</i> | TGACG-motif     | 299            | 304           | cis-acting regulatory element involved in the MeJA-responsiveness   |
| <i>CsDof102</i> | TGACG-motif     | 516            | 521           | cis-acting regulatory element involved in the MeJA-responsiveness   |
| <i>CsDof102</i> | TGACG-motif     | 862            | 867           | cis-acting regulatory element involved in the MeJA-responsiveness   |
| <i>CsDof102</i> | TGACG-motif     | 885            | 890           | cis-acting regulatory element involved in the MeJA-responsiveness   |
| <i>CsDof102</i> | CGTCA-motif     | 299            | 304           | cis-acting regulatory element involved in the MeJA-responsiveness   |
| <i>CsDof102</i> | CGTCA-motif     | 516            | 521           | cis-acting regulatory element involved in the MeJA-responsiveness   |
| <i>CsDof102</i> | CGTCA-motif     | 862            | 867           | cis-acting regulatory element involved in the MeJA-responsiveness   |
| <i>CsDof102</i> | CGTCA-motif     | 885            | 890           | cis-acting regulatory element involved in the MeJA-responsiveness   |
| <i>CsDof102</i> | CAAT-box        | 62             | 67            | common cis-acting element in promoter and enhancer regions          |
| <i>CsDof102</i> | CAAT-box        | 137            | 142           | common cis-acting element in promoter and enhancer regions          |
| <i>CsDof102</i> | CAAT-box        | 143            | 148           | common cis-acting element in promoter and enhancer regions          |
| <i>CsDof102</i> | CAAT-box        | 196            | 201           | common cis-acting element in promoter and enhancer regions          |
| <i>CsDof102</i> | CAAT-box        | 204            | 209           | common cis-acting element in promoter and enhancer regions          |
| <i>CsDof102</i> | CAAT-box        | 280            | 285           | common cis-acting element in promoter and enhancer regions          |
| <i>CsDof102</i> | CAAT-box        | 375            | 380           | common cis-acting element in promoter and enhancer regions          |
| <i>CsDof102</i> | CAAT-box        | 463            | 468           | common cis-acting element in promoter and enhancer regions          |
| <i>CsDof102</i> | CAAT-box        | 567            | 572           | common cis-acting element in promoter and enhancer regions          |
| <i>CsDof102</i> | CAAT-box        | 707            | 712           | common cis-acting element in promoter and enhancer regions          |
| <i>CsDof102</i> | CAAT-box        | 710            | 715           | common cis-acting element in promoter and enhancer regions          |
| <i>CsDof102</i> | CAAT-box        | 988            | 993           | common cis-acting element in promoter and enhancer regions          |
| <i>CsDof102</i> | CAAT-box        | 1013           | 1018          | common cis-acting element in promoter and enhancer regions          |
| <i>CsDof102</i> | CAAT-box        | 1031           | 1036          | common cis-acting element in promoter and enhancer regions          |
| <i>CsDof102</i> | CAAT-box        | 1237           | 1242          | common cis-acting element in promoter and enhancer regions          |
| <i>CsDof102</i> | CAAT-box        | 1273           | 1278          | common cis-acting element in promoter and enhancer regions          |
| <i>CsDof102</i> | CAAT-box        | 1330           | 1335          | common cis-acting element in promoter and enhancer regions          |
| <i>CsDof102</i> | CAAT-box        | 1361           | 1366          | common cis-acting element in promoter and enhancer regions          |
| <i>CsDof102</i> | CAAT-box        | 1417           | 1422          | common cis-acting element in promoter and enhancer regions          |
| <i>CsDof102</i> | CAAT-box        | 1869           | 1874          | common cis-acting element in promoter and enhancer regions          |
| <i>CsDof102</i> | CAAT-box        | 1947           | 1952          | common cis-acting element in promoter and enhancer regions          |
| <i>CsDof102</i> | CAAT-box        | 1953           | 1958          | common cis-acting element in promoter and enhancer regions          |
| <i>CsDof102</i> | TATA-box        | 29             | 37            | core promoter element around -30 of transcription start             |
| <i>CsDof102</i> | TATA-box        | 33             | 41            | core promoter element around -30 of transcription start             |
| <i>CsDof102</i> | TATA-box        | 46             | 50            | core promoter element around -30 of transcription start             |
| <i>CsDof102</i> | TATA-box        | 96             | 100           | core promoter element around -30 of transcription start             |
| <i>CsDof102</i> | TATA-box        | 631            | 638           | core promoter element around -30 of transcription start             |
| <i>CsDof102</i> | TATA-box        | 632            | 638           | core promoter element around -30 of transcription start             |
| <i>CsDof102</i> | TATA-box        | 633            | 640           | core promoter element around -30 of transcription start             |
| <i>CsDof102</i> | TATA-box        | 634            | 640           | core promoter element around -30 of transcription start             |

| Name            | Cis-element | Start position | Stop position | Function                                                            |
|-----------------|-------------|----------------|---------------|---------------------------------------------------------------------|
| <i>CsDof102</i> | TATA-box    | 635            | 641           | core promoter element around -30 of transcription start             |
| <i>CsDof102</i> | TATA-box    | 636            | 642           | core promoter element around -30 of transcription start             |
| <i>CsDof102</i> | TATA-box    | 637            | 643           | core promoter element around -30 of transcription start             |
| <i>CsDof102</i> | TATA-box    | 638            | 642           | core promoter element around -30 of transcription start             |
| <i>CsDof102</i> | TATA-box    | 642            | 648           | core promoter element around -30 of transcription start             |
| <i>CsDof102</i> | TATA-box    | 643            | 648           | core promoter element around -30 of transcription start             |
| <i>CsDof102</i> | TATA-box    | 644            | 648           | core promoter element around -30 of transcription start             |
| <i>CsDof102</i> | TATA-box    | 675            | 679           | core promoter element around -30 of transcription start             |
| <i>CsDof102</i> | TATA-box    | 719            | 725           | core promoter element around -30 of transcription start             |
| <i>CsDof102</i> | TATA-box    | 721            | 725           | core promoter element around -30 of transcription start             |
| <i>CsDof102</i> | TATA-box    | 942            | 948           | core promoter element around -30 of transcription start             |
| <i>CsDof102</i> | TATA-box    | 943            | 950           | core promoter element around -30 of transcription start             |
| <i>CsDof102</i> | TATA-box    | 944            | 950           | core promoter element around -30 of transcription start             |
| <i>CsDof102</i> | TATA-box    | 945            | 951           | core promoter element around -30 of transcription start             |
| <i>CsDof102</i> | TATA-box    | 946            | 950           | core promoter element around -30 of transcription start             |
| <i>CsDof102</i> | TATA-box    | 1473           | 1479          | core promoter element around -30 of transcription start             |
| <i>CsDof102</i> | TATA-box    | 1474           | 1478          | core promoter element around -30 of transcription start             |
| <i>CsDof102</i> | TATA-box    | 1512           | 1518          | core promoter element around -30 of transcription start             |
| <i>CsDof102</i> | TATA-box    | 1513           | 1518          | core promoter element around -30 of transcription start             |
| <i>CsDof102</i> | TATA-box    | 1514           | 1518          | core promoter element around -30 of transcription start             |
| <i>CsDof102</i> | TATA-box    | 1563           | 1569          | core promoter element around -30 of transcription start             |
| <i>CsDof102</i> | TATA-box    | 1564           | 1570          | core promoter element around -30 of transcription start             |
| <i>CsDof102</i> | TATA-box    | 1566           | 1570          | core promoter element around -30 of transcription start             |
| <i>CsDof102</i> | TATA-box    | 1643           | 1650          | core promoter element around -30 of transcription start             |
| <i>CsDof102</i> | TATA-box    | 1674           | 1680          | core promoter element around -30 of transcription start             |
| <i>CsDof102</i> | TATA-box    | 1675           | 1679          | core promoter element around -30 of transcription start             |
| <i>CsDof102</i> | TATA-box    | 1684           | 1688          | core promoter element around -30 of transcription start             |
| <i>CsDof102</i> | TATA-box    | 1758           | 1762          | core promoter element around -30 of transcription start             |
| <i>CsDof102</i> | Sp1         | 830            | 836           | light responsive element                                            |
| <i>CsDof102</i> | GT1-motif   | 1222           | 1228          | light responsive element                                            |
| <i>CsDof102</i> | AAAC-motif  | 1914           | 1925          | light responsive element                                            |
| <i>CsDof102</i> | MRE         | 900            | 907           | MYB binding site involved in light responsiveness                   |
| <i>CsDof103</i> | ABRE        | 1209           | 1214          | abscisic acid responsiveness                                        |
| <i>CsDof103</i> | LTR         | 536            | 542           | cis-acting element involved in low-temperature responsiveness       |
| <i>CsDof103</i> | ARE         | 300            | 306           | cis-acting regulatory element essential for the anaerobic induction |
| <i>CsDof103</i> | ARE         | 436            | 442           | cis-acting regulatory element essential for the anaerobic induction |
| <i>CsDof103</i> | ARE         | 472            | 478           | cis-acting regulatory element essential for the anaerobic induction |
| <i>CsDof103</i> | ARE         | 1945           | 1951          | cis-acting regulatory element essential for the anaerobic induction |
| <i>CsDof103</i> | G-box       | 1209           | 1215          | cis-acting regulatory element involved in light responsiveness      |
| <i>CsDof103</i> | TGACG-motif | 19             | 24            | cis-acting regulatory element involved in the MeJA-responsiveness   |
| <i>CsDof103</i> | TGACG-motif | 964            | 969           | cis-acting regulatory element involved in the MeJA-responsiveness   |
| <i>CsDof103</i> | TGACG-motif | 1019           | 1024          | cis-acting regulatory element involved in the MeJA-responsiveness   |
| <i>CsDof103</i> | CGTCA-motif | 19             | 24            | cis-acting regulatory element involved in the MeJA-responsiveness   |
| <i>CsDof103</i> | CGTCA-motif | 964            | 969           | cis-acting regulatory element involved in the MeJA-responsiveness   |
| <i>CsDof103</i> | CGTCA-motif | 1019           | 1024          | cis-acting regulatory element involved in the MeJA-responsiveness   |
| <i>CsDof103</i> | CAT-box     | 1247           | 1253          | cis-acting regulatory element related to meristem expression        |
| <i>CsDof103</i> | CAAT-box    | 274            | 279           | common cis-acting element in promoter and enhancer regions          |
| <i>CsDof103</i> | CAAT-box    | 336            | 341           | common cis-acting element in promoter and enhancer regions          |
| <i>CsDof103</i> | CAAT-box    | 353            | 358           | common cis-acting element in promoter and enhancer regions          |
| <i>CsDof103</i> | CAAT-box    | 368            | 373           | common cis-acting element in promoter and enhancer regions          |
| <i>CsDof103</i> | CAAT-box    | 462            | 467           | common cis-acting element in promoter and enhancer regions          |

| <b>Name</b>     | <b>Cis-element</b> | <b>Start position</b> | <b>Stop position</b> | <b>Function</b>                                            |
|-----------------|--------------------|-----------------------|----------------------|------------------------------------------------------------|
| <i>CsDof103</i> | CAAT-box           | 614                   | 619                  | common cis-acting element in promoter and enhancer regions |
| <i>CsDof103</i> | CAAT-box           | 840                   | 845                  | common cis-acting element in promoter and enhancer regions |
| <i>CsDof103</i> | CAAT-box           | 942                   | 947                  | common cis-acting element in promoter and enhancer regions |
| <i>CsDof103</i> | CAAT-box           | 1463                  | 1468                 | common cis-acting element in promoter and enhancer regions |
| <i>CsDof103</i> | CAAT-box           | 1728                  | 1733                 | common cis-acting element in promoter and enhancer regions |
| <i>CsDof103</i> | CAAT-box           | 1930                  | 1935                 | common cis-acting element in promoter and enhancer regions |
| <i>CsDof103</i> | TATA-box           | 279                   | 283                  | core promoter element around -30 of transcription start    |
| <i>CsDof103</i> | TATA-box           | 290                   | 296                  | core promoter element around -30 of transcription start    |
| <i>CsDof103</i> | TATA-box           | 291                   | 296                  | core promoter element around -30 of transcription start    |
| <i>CsDof103</i> | TATA-box           | 292                   | 296                  | core promoter element around -30 of transcription start    |
| <i>CsDof103</i> | TATA-box           | 363                   | 372                  | core promoter element around -30 of transcription start    |
| <i>CsDof103</i> | TATA-box           | 557                   | 561                  | core promoter element around -30 of transcription start    |
| <i>CsDof103</i> | TATA-box           | 725                   | 734                  | core promoter element around -30 of transcription start    |
| <i>CsDof103</i> | TATA-box           | 726                   | 732                  | core promoter element around -30 of transcription start    |
| <i>CsDof103</i> | TATA-box           | 727                   | 734                  | core promoter element around -30 of transcription start    |
| <i>CsDof103</i> | TATA-box           | 728                   | 734                  | core promoter element around -30 of transcription start    |
| <i>CsDof103</i> | TATA-box           | 729                   | 735                  | core promoter element around -30 of transcription start    |
| <i>CsDof103</i> | TATA-box           | 730                   | 736                  | core promoter element around -30 of transcription start    |
| <i>CsDof103</i> | TATA-box           | 732                   | 736                  | core promoter element around -30 of transcription start    |
| <i>CsDof103</i> | TATA-box           | 795                   | 802                  | core promoter element around -30 of transcription start    |
| <i>CsDof103</i> | TATA-box           | 796                   | 802                  | core promoter element around -30 of transcription start    |
| <i>CsDof103</i> | TATA-box           | 797                   | 802                  | core promoter element around -30 of transcription start    |
| <i>CsDof103</i> | TATA-box           | 798                   | 802                  | core promoter element around -30 of transcription start    |
| <i>CsDof103</i> | TATA-box           | 802                   | 808                  | core promoter element around -30 of transcription start    |
| <i>CsDof103</i> | TATA-box           | 803                   | 807                  | core promoter element around -30 of transcription start    |
| <i>CsDof103</i> | TATA-box           | 913                   | 919                  | core promoter element around -30 of transcription start    |
| <i>CsDof103</i> | TATA-box           | 914                   | 919                  | core promoter element around -30 of transcription start    |
| <i>CsDof103</i> | TATA-box           | 915                   | 919                  | core promoter element around -30 of transcription start    |
| <i>CsDof103</i> | TATA-box           | 936                   | 940                  | core promoter element around -30 of transcription start    |
| <i>CsDof103</i> | TATA-box           | 1035                  | 1041                 | core promoter element around -30 of transcription start    |
| <i>CsDof103</i> | TATA-box           | 1036                  | 1041                 | core promoter element around -30 of transcription start    |
| <i>CsDof103</i> | TATA-box           | 1037                  | 1041                 | core promoter element around -30 of transcription start    |
| <i>CsDof103</i> | TATA-box           | 1092                  | 1099                 | core promoter element around -30 of transcription start    |
| <i>CsDof103</i> | TATA-box           | 1149                  | 1158                 | core promoter element around -30 of transcription start    |
| <i>CsDof103</i> | TATA-box           | 1154                  | 1160                 | core promoter element around -30 of transcription start    |
| <i>CsDof103</i> | TATA-box           | 1155                  | 1159                 | core promoter element around -30 of transcription start    |
| <i>CsDof103</i> | TATA-box           | 1201                  | 1207                 | core promoter element around -30 of transcription start    |
| <i>CsDof103</i> | TATA-box           | 1202                  | 1208                 | core promoter element around -30 of transcription start    |
| <i>CsDof103</i> | TATA-box           | 1203                  | 1209                 | core promoter element around -30 of transcription start    |
| <i>CsDof103</i> | TATA-box           | 1205                  | 1209                 | core promoter element around -30 of transcription start    |
| <i>CsDof103</i> | TATA-box           | 1215                  | 1221                 | core promoter element around -30 of transcription start    |
| <i>CsDof103</i> | TATA-box           | 1216                  | 1220                 | core promoter element around -30 of transcription start    |
| <i>CsDof103</i> | TATA-box           | 1319                  | 1325                 | core promoter element around -30 of transcription start    |
| <i>CsDof103</i> | TATA-box           | 1320                  | 1324                 | core promoter element around -30 of transcription start    |
| <i>CsDof103</i> | TATA-box           | 1328                  | 1334                 | core promoter element around -30 of transcription start    |
| <i>CsDof103</i> | TATA-box           | 1329                  | 1335                 | core promoter element around -30 of transcription start    |
| <i>CsDof103</i> | TATA-box           | 1330                  | 1336                 | core promoter element around -30 of transcription start    |
| <i>CsDof103</i> | TATA-box           | 1331                  | 1335                 | core promoter element around -30 of transcription start    |
| <i>CsDof103</i> | TATA-box           | 1367                  | 1371                 | core promoter element around -30 of transcription start    |
| <i>CsDof103</i> | TATA-box           | 1382                  | 1388                 | core promoter element around -30 of transcription start    |
| <i>CsDof103</i> | TATA-box           | 1383                  | 1387                 | core promoter element around -30 of transcription start    |



| <b>Name</b>     | <b>Cis-element</b> | <b>Start position</b> | <b>Stop position</b> | <b>Function</b>                                            |
|-----------------|--------------------|-----------------------|----------------------|------------------------------------------------------------|
| <i>CsDof103</i> | TATA-box           | 1788                  | 1794                 | core promoter element around -30 of transcription start    |
| <i>CsDof103</i> | TATA-box           | 1789                  | 1795                 | core promoter element around -30 of transcription start    |
| <i>CsDof103</i> | TATA-box           | 1790                  | 1796                 | core promoter element around -30 of transcription start    |
| <i>CsDof103</i> | TATA-box           | 1791                  | 1795                 | core promoter element around -30 of transcription start    |
| <i>CsDof103</i> | TATA-box           | 1803                  | 1809                 | core promoter element around -30 of transcription start    |
| <i>CsDof103</i> | TATA-box           | 1805                  | 1811                 | core promoter element around -30 of transcription start    |
| <i>CsDof103</i> | TATA-box           | 1806                  | 1812                 | core promoter element around -30 of transcription start    |
| <i>CsDof103</i> | TATA-box           | 1807                  | 1813                 | core promoter element around -30 of transcription start    |
| <i>CsDof103</i> | TATA-box           | 1808                  | 1814                 | core promoter element around -30 of transcription start    |
| <i>CsDof103</i> | TATA-box           | 1809                  | 1813                 | core promoter element around -30 of transcription start    |
| <i>CsDof103</i> | TATA-box           | 1890                  | 1896                 | core promoter element around -30 of transcription start    |
| <i>CsDof103</i> | TATA-box           | 1891                  | 1895                 | core promoter element around -30 of transcription start    |
| <i>CsDof103</i> | AT-rich sequence   | 495                   | 504                  | element for maximal elicitor-mediated activation (2copies) |
| <i>CsDof103</i> | P-box              | 1058                  | 1065                 | gibberellin-responsive element                             |
| <i>CsDof103</i> | GT1-motif          | 968                   | 975                  | light responsive element                                   |
| <i>CsDof103</i> | MBS                | 312                   | 318                  | MYB binding site involved in drought-inducibility          |
