# Supplementary material for: Genome-wide identification and functional analysis of Dof transcription factor family in Camelina sativa
Source: PubMed Central journal article supplement (PMC9730592; doi:10.1186/s12864-022-09056-9), 2022-12-08
Supplement: 12864_2022_9056_MOESM9_ESM.pdf [file 12864_2022_9056_MOESM9_ESM.pdf]

**Table S7. Expression levels (FPKM values) of 103 CsDof genes across 12 different tissue samples.**

| Name    | CsDof1    | CsDof2   | CsDof3    | CsDof4   | CsDof5   | CsDof6    | CsDof7    | CsDof8   | CsDof9   | CsDof10  | CsDof11  | CsDof12  | CsDof13  | CsDof14   | CsDof15  | CsDof16  | CsDof17  | CsDof18  | CsDof19  | CsDof20  | CsDof21  | CsDof22  |
|---------|-----------|----------|-----------|----------|----------|-----------|-----------|----------|----------|----------|----------|----------|----------|-----------|----------|----------|----------|----------|----------|----------|----------|----------|
| C_r1    | 0.618335  | 2.91878  | 0.924871  | 1.38355  | 6.61165  | 3.35082   | 2.5508    | 1.37185  | 0        | 4.05686  | 0.27675  | 0        | 0.866932 | 0.469684  | 3.22966  | 0.846489 | 2.32094  | 0        | 0        | 0.529854 | 0.104717 | 1.9571   |
| C_r2    | 0.412242  | 1.65013  | 0.438673  | 1.12343  | 7.78906  | 2.03219   | 1.99353   | 1.36658  | 0        | 3.60898  | 0.184374 | 0.11406  | 2.8886   | 0         | 2.89713  | 1.35016  | 2.05326  | 0        | 0        | 0.421957 | 0.208476 | 1.01025  |
| C_r3    | 0         | 1.85437  | 0.612278  | 1.06816  | 5.87899  | 2.53112   | 1.73777   | 2.03414  | 0        | 3.59169  | 1.66283  | 0        | 1.60238  | 0         | 3.62745  | 1.56802  | 1.09867  | 0        | 0.205399 | 0.589577 | 0.145653 | 0.655294 |
| EMSD_r1 | 0         | 0.347758 | 0.423802  | 0.245907 | 2.81342  | 0.466545  | 0.240127  | 4.61754  | 0        | 1.1887   | 0.436245 | 0        | 3.18402  | 0         | 2.8388   | 0.540616 | 1.40186  | 0        | 0        | 2.21641  | 2.19051  | 1.39897  |
| EMSD_r2 | 0.863824  | 1.06659  | 0.0930146 | 0.216238 | 3.02695  | 0         | 0.844386  | 12.2626  | 0.105235 | 1.04039  | 1.35511  | 0        | 3.03048  | 0         | 1.81656  | 0.356964 | 1.50012  | 0        | 0        | 0.597515 | 0.811905 | 0.996103 |
| EMSD_r3 | 0         | 0.734634 | 0.513893  | 0.748473 | 1.74507  | 0         | 0.730376  | 5.33756  | 0        | 1.25182  | 0        | 0        | 3.4075   | 0.229926  | 3.46123  | 0.82514  | 1.03193  | 0.15016  | 0        | 1.64581  | 2.13439  | 0.316677 |
| ESD_r1  | 1.15314   | 4.49383  | 0.244378  | 0.14231  | 5.43974  | 0         | 0.138879  | 3.42627  | 0        | 1.53199  | 1.80366  | 0        | 2.42282  | 0         | 4.78539  | 1.09786  | 0.803588 | 0.428252 | 0        | 1.66402  | 0.773757 | 3.11374  |
| ESD_r2  | 0         | 2.47932  | 0.55437   | 0.486471 | 3.02969  | 0.153357  | 0.316248  | 3.02587  | 0.315268 | 1.62739  | 2.41242  | 0.18187  | 1.26364  | 0         | 3.07227  | 2.51028  | 1.90991  | 0        | 0        | 2.42909  | 0.981645 | 2.60743  |
| ESD_r3  | 0.548174  | 2.23031  | 0.246109  | 0        | 1.37312  | 0         | 1.39035   | 3.062    | 0        | 0.694899 | 1.98022  | 0        | 1.0304   | 0.424975  | 5.07101  | 4.05651  | 0.909878 | 0        | 0        | 1.98878  | 0.393191 | 3.46614  |
| F_r1    | 0         | 3.27078  | 0.332654  | 2.31928  | 2.54249  | 0.733015  | 4.15114   | 1.03587  | 0        | 2.55961  | 2.0725   | 0.431069 | 2.88334  | 1.17535   | 6.89966  | 4.67836  | 0.731984 | 1.16318  | 0        | 1.60334  | 3.69712  | 4.93435  |
| F_r2    | 0.355474  | 4.74895  | 0.152643  | 2.83994  | 4.39221  | 0.504752  | 1.03959   | 1.26774  | 0.17275  | 0.853083 | 1.59239  | 0        | 2.32707  | 0.811674  | 5.21955  | 2.73549  | 2.23663  | 0.8902   | 0        | 1.34766  | 1.81603  | 4.27356  |
| F_r3    | 1.07102   | 4.07526  | 0.787183  | 2.18961  | 5.18843  | 0.34635   | 1.0693    | 0.65327  | 0.44425  | 2.54522  | 1.44625  | 0.101524 | 5.35792  | 0.961608  | 5.35939  | 3.90758  | 2.1455   | 0.823559 | 0        | 2.34711  | 3.76193  | 5.20427  |
| GS_r1   | 0         | 0.649713 | 0.220705  | 0.205538 | 0.170405 | 0         | 0.1003    | 0.641719 | 0.449998 | 0.8309   | 0.278327 | 0.401715 | 0.96903  | 0         | 0.107974 | 0.962366 | 0.516497 | 0        | 0.298207 | 0.636866 | 0.41954  | 0.762393 |
| GS_r2   | 0.0937665 | 0.918615 | 0.673271  | 0.145986 | 0.195704 | 0.0231108 | 0.0475463 | 0.698058 | 1.04303  | 0.891006 | 0.169348 | 0.162157 | 1.05746  | 0.0363401 | 0.102012 | 0.426857 | 0.528889 | 0        | 0        | 0.323015 | 0.319307 | 0.453166 |
| GS_r3   | 0         | 0        | 0         | 0        | 0.884632 | 0         | 0         | 0.957562 | 0        | 0.966561 | 0        | 0        | 0        | 0.817401  | 0        | 0        | 0.337886 | 0        | 0        | 1.11048  | 0        | 1.13929  |
| IF_r1   | 0.580285  | 3.20009  | 0.979463  | 5.13613  | 7.60657  | 0.540527  | 3.0628    | 0.763008 | 1.11039  | 0.851965 | 1.03645  | 0        | 0.541598 | 0.438433  | 2.09931  | 3.46049  | 1.25142  | 1.14491  | 0        | 2.15634  | 1.93694  | 5.83396  |
| IF_r2   | 2.84687   | 2.48644  | 0.911779  | 4.95112  | 5.85257  | 0.670291  | 2.41626   | 0.315574 | 2.40905  | 0.84822  | 0.636999 | 0        | 3.32589  | 0         | 3.34356  | 2.72648  | 0.444839 | 0        | 0        | 2.43738  | 2.40852  | 3.75124  |
| IF_r3   | 1.50388   | 1.84682  | 1.2893    | 5.74825  | 4.33343  | 0.236887  | 2.92748   | 0.892375 | 1.21615  | 0.750282 | 1.34693  | 0        | 1.87487  | 0.190632  | 3.54373  | 2.33889  | 0.944253 | 0.501381 | 0        | 1.98289  | 3.23738  | 3.98032  |
| LSD_r1  | 0         | 0        | 0.665003  | 0.465098 | 0.517361 | 0         | 0.151274  | 0.138154 | 3.46879  | 0.462486 | 0.28207  | 0        | 0        | 0         | 0        | 0.170963 | 0.388214 | 0.466547 | 0        | 0        | 0.105165 | 0.218461 |
| LSD_r2  | 0         | 0        | 1.01175   | 0.169175 | 0.28787  | 0.319942  | 0.164957  | 0.300563 | 3.94666  | 0.498827 | 0        | 0        | 0        | 0         | 0        | 0        | 0.523841 | 1.69717  | 0        | 0        | 0.22739  | 0        |
| LSD_r3  | 0         | 0.225565 | 0.829321  | 0.322431 | 0.809324 | 0         | 0         | 0.143597 | 6.27253  | 0.384077 | 0        | 0        | 0        | 0         | 0        | 0.355721 | 0.806094 | 0.808601 | 0        | 0        | 0        | 0.340327 |
| LMSD_r1 | 0.577619  | 0.719905 | 0.752522  | 0.582558 | 2.62598  | 0         | 0.711004  | 0.780984 | 2.69387  | 0.175687 | 1.55568  | 0        | 0.270438 | 0         | 0        | 0.48049  | 1.10517  | 0.146081 | 0        | 0.504174 | 0.498265 | 0.413729 |
| LMSD_r2 | 1.01763   | 0.42842  | 0.436174  | 0.608768 | 1.8431   | 0         | 0.297116  | 0.362273 | 0.987438 | 0.609163 | 1.45826  | 0        | 0.951486 | 0         | 1.06566  | 0.670253 | 0.894427 | 0.101772 | 0        | 0.489982 | 0.622535 | 1.00542  |
| LMSD_r3 | 0         | 0.482285 | 0.589049  | 0.513705 | 2.82447  | 0         | 0.835767  | 0.611523 | 1.1666   | 0.205764 | 0.92158  | 0        | 0.641309 | 0         | 0.179835 | 0.188495 | 0.755263 | 0.171759 | 0        | 0.591001 | 0.817639 | 0.727597 |
| OL_r1   | 0         | 0.742031 | 12.0139   | 0.263687 | 6.10091  | 1.4995    | 0         | 1.41209  | 0        | 10.4441  | 0        | 0        | 1.98021  | 0         | 4.43154  | 0        | 3.98323  | 0        | 0        | 1.45482  | 0.179702 | 0.373159 |
| OL_r2   | 0.256938  | 0.527579 | 6.89552   | 0        | 2.10089  | 1.30871   | 0         | 1.11929  | 0        | 5.39062  | 0.458389 | 0        | 4.31345  | 0         | 1.58514  | 0        | 2.67121  | 0        | 0        | 1.55117  | 0.34058  | 0.619109 |
| OL_r3   | 0         | 1.76406  | 12.9663   | 0.157477 | 3.94582  | 2.83339   | 0         | 1.54338  | 0        | 5.82132  | 0.286913 | 0        | 1.49974  | 0         | 3.97312  | 0        | 2.56158  | 0        | 0        | 1.29669  | 0.213531 | 0.665389 |
| R_r1    | 1.31357   | 2.56677  | 13.8225   | 8.14555  | 4.42189  | 1.13395   | 5.29763   | 1.63529  | 0.233007 | 1.18715  | 1.90187  | 0        | 4.28482  | 1.11064   | 15.0322  | 0.793259 | 8.17329  | 0.961311 | 0        | 4.70269  | 3.02545  | 10.3835  |
| R_r2    | 1.45864   | 2.05024  | 16.6042   | 6.75363  | 5.65846  | 0.67304   | 3.988     | 1.02874  | 0.518592 | 1.53361  | 0.65011  | 0        | 4.75937  | 0.685858  | 15.9781  | 1.07865  | 8.10275  | 1.24799  | 0        | 4.9927   | 3.06798  | 7.87408  |
| R_r3    | 0.173649  | 2.35108  | 16.7396   | 3.69223  | 3.56371  | 0.488113  | 3.26818   | 0.918972 | 0.334192 | 0.976363 | 0.310522 | 0        | 2.27068  | 0.263106  | 18.4957  | 1.23     | 4.63598  | 1.29197  | 0        | 4.31362  | 2.39394  | 6.36658  |
| S_r1    | 0.189602  | 12.4593  | 1.67749   | 5.58612  | 7.76293  | 1.05811   | 4.99655   | 0        | 0.271716 | 2.66718  | 1.01565  | 0        | 6.19253  | 0.715787  | 7.04591  | 2.66916  | 3.2066   | 1.68105  | 0        | 4.41149  | 4.80105  | 5.77391  |
| S_r2    | 1.0507    | 9.0337   | 3.31883   | 4.64198  | 6.02203  | 1.2212    | 4.27786   | 0.804388 | 0.125439 | 2.00066  | 0.938    | 0.14416  | 3.67664  | 0.198302  | 6.23465  | 2.13279  | 3.39099  | 0.776073 | 0        | 4.07283  | 4.46163  | 8.26862  |
| S_r3    | 0.225235  | 13.8577  | 2.34718   | 7.01229  | 6.61756  | 1.76325   | 5.77202   | 0.390207 | 0.213127 | 2.5411   | 0.802762 | 0        | 5.24803  | 0.677177  | 7.7197   | 1.81391  | 3.35074  | 1.09911  | 0        | 5.25209  | 4.52187  | 2.61839  |
| YL_r1   | 0.347045  | 2.03335  | 0.146437  | 2.90094  | 3.9805   | 0.323253  | 3.49681   | 2.12942  | 0        | 1.22279  | 1.23972  | 0        | 1.29563  | 0.262205  | 2.15223  | 3.38646  | 0.641471 | 0.171174 | 0.332381 | 2.2274   | 0.57917  | 0.721834 |
| YL_r2   | 0.340104  | 0.949376 | 0         | 1.35069  | 4.19369  | 1.59994   | 3.79014   | 0.753213 | 0        | 3.13717  | 2.13037  | 0.188518 | 2.22478  | 0.258141  | 2.83791  | 2.60354  | 0.636889 | 0        | 0        | 2.21025  | 0.574753 | 1.07423  |
| YL_r3   | 0.311061  | 1.83505  | 0.462173  | 2.15271  | 3.31918  | 0.801236  | 3.30139   | 1.8513   | 0        | 2.20826  | 1.39052  | 0        | 0.871576 | 0.353427  | 2.34276  | 1.52494  | 0.530874 | 0.15424  | 0.149025 | 2.27484  | 0.731847 | 1.03142  |

| Name    | CsDof23   | CsDof24   | CsDof25   | CsDof26 | CsDof27  | CsDof28  | CsDof29  | CsDof30   | CsDof31   | CsDof32   | CsDof33  | CsDof34   | CsDof35  | CsDof36  | CsDof37  | CsDof38  | CsDof39  | CsDof40  | CsDof41  | CsDof42  | CsDof43   | CsDof44  |
|---------|-----------|-----------|-----------|---------|----------|----------|----------|-----------|-----------|-----------|----------|-----------|----------|----------|----------|----------|----------|----------|----------|----------|-----------|----------|
| C_r1    | 0.511221  | 0.592923  | 3.68238   | 9.38113 | 2.7807   | 1.00994  | 3.14338  | 2.13948   | 0.554811  | 0         | 0.984244 | 0.25528   | 1.12296  | 0        | 4.17317  | 5.10377  | 0        | 0.953737 | 1.53652  | 2.20584  | 0.72795   | 0.957674 |
| C_r2    | 0.621695  | 0.236159  | 3.68364   | 10.4683 | 1.49053  | 0.595848 | 3.56495  | 2.02815   | 0.27635   | 0         | 1.1613   | 0.0847484 | 0.541945 | 0.106726 | 3.844    | 6.59579  | 0        | 0.140652 | 1.83531  | 1.80429  | 0.345052  | 1.63541  |
| C_r3    | 0.395181  | 0.439735  | 4.43627   | 11.714  | 1.78505  | 1.14446  | 2.0973   | 1.65334   | 0.0642685 | 0         | 0.912597 | 0.207041  | 1.11236  | 0.185987 | 4.3377   | 6.29571  | 0.223395 | 0.611432 | 1.47235  | 2.16087  | 0.313405  | 1.14109  |
| EMSD_r1 | 0.549706  | 0.190497  | 0.626764  | 3.34417 | 3.26892  | 0.180404 | 0.58935  | 1.14795   | 0.8891    | 0         | 0.703498 | 0.20482   | 0.985935 | 1.02689  | 0.998144 | 0.88429  | 0        | 2.21641  | 2.638    | 1.35453  | 0         | 1.53505  |
| EMSD_r2 | 1.02183   | 1.42006   | 0.684252  | 3.48586 | 2.78892  | 1.02789  | 0.389602 | 1.65184   | 1.26902   | 0         | 0.693601 | 0.359503  | 0.719647 | 0.6776   | 1.30891  | 0.582501 | 1.98935  | 0.253631 | 3.10497  | 1.3118   | 0         | 0.674056 |
| EMSD_r3 | 1.15627   | 0.92163   | 0.938049  | 3.04026 | 4.15282  | 0.762791 | 0.360859 | 2.07617   | 1.34929   | 0         | 0.424709 | 0.868531  | 0.594408 | 0.782398 | 1.57231  | 1.61016  | 0        | 2.88017  | 2.78341  | 0.827023 | 0         | 0.399215 |
| ESD_r1  | 0.864883  | 0.657592  | 1.72721   | 5.54234 | 3.16137  | 0.414727 | 1.54278  | 3.01079   | 1.53974   | 0         | 2.3237   | 0.47207   | 0.659957 | 1.93361  | 2.85155  | 3.57284  | 0        | 1.1746   | 3.02727  | 1.57194  | 0.288143  | 1.64516  |
| ESD_r2  | 1.6778    | 0.867697  | 2.19797   | 5.05447 | 3.23239  | 1.05397  | 0.786539 | 0.636239  | 1.4574    | 0         | 1.14044  | 0.133734  | 0.212523 | 3.39465  | 1.83846  | 2.31856  | 1.87358  | 0.560787 | 3.09235  | 1.2581   | 0.43319   | 2.44259  |
| ESD_r3  | 1.12605   | 0.221746  | 2.33135   | 6.55628 | 3.61187  | 1.26132  | 1.69654  | 0.574278  | 3.35241   | 0         | 4.30583  | 0         | 0.191804 | 5.04517  | 2.19364  | 1.53909  | 0        | 1.19327  | 3.27144  | 0.938128 | 0.585831  | 1.01799  |
| F_r1    | 6.23851   | 3.28686   | 3.42952   | 6.23353 | 5.66321  | 2.26292  | 3.71266  | 2.31273   | 3.83988   | 0         | 2.75714  | 2.25015   | 2.05992  | 2.01858  | 6.05153  | 5.55481  | 3.12598  | 0        | 2.06689  | 3.8363   | 2.36039   | 2.75486  |
| F_r2    | 5.81509   | 2.32986   | 2.4675    | 7.22568 | 4.8221   | 4.1508   | 3.62634  | 2.47376   | 2.243     | 0         | 2.27559  | 1.03236   | 2.00664  | 2.22506  | 3.21896  | 6.05477  | 1.98371  | 0        | 1.30282  | 1.76248  | 1.20234   | 3.63484  |
| F_r3    | 3.89093   | 2.40803   | 4.83155   | 5.51337 | 6.08097  | 4.56264  | 3.71028  | 2.25817   | 4.37461   | 0         | 2.28985  | 0.989406  | 2.62961  | 2.85622  | 5.20833  | 5.50049  | 0.582827 | 2.90552  | 2.02482  | 2.2091   | 1.1832    | 3.09478  |
| GS_r1   | 0.710843  | 0.356443  | 1.4222    | 4.57037 | 0.928441 | 0.56208  | 0.309257 | 1.25846   | 0.0463459 | 0.0982329 | 1.20503  | 0.341106  | 1.09062  | 1.07395  | 2.88792  | 1.79751  | 0        | 0.884536 | 0.34198  | 1.1915   | 0.208316  | 0.594251 |
| GS_r2   | 0.412518  | 0.625557  | 1.43685   | 2.92701 | 0.548901 | 0.305501 | 0.203078 | 0.687272  | 0.0440924 | 0.0892279 | 0.736162 | 0.244218  | 0.85259  | 0.888052 | 3.2001   | 1.24999  | 0        | 0.510024 | 0.427704 | 0.882284 | 0.166929  | 0.413385 |
| GS_r3   | 1.78675   | 0         | 1.35553   | 3.18371 | 0.747145 | 0.391908 | 0        | 1.06774   | 0         | 0         | 2.2918   | 0.445587  | 0.356635 | 1.12042  | 2.16129  | 1.92562  | 0        | 1.11048  | 0.357846 | 0.591657 | 0.363273  | 0.47748  |
| IF_r1   | 4.40672   | 3.73254   | 3.45555   | 8.69188 | 2.17642  | 4.77653  | 3.78371  | 0.753635  | 1.28589   | 0         | 1.82115  | 1.1824    | 2.26554  | 0.298283 | 4.56539  | 10.23    | 0        | 1.17619  | 1.89443  | 1.26123  | 1.15407   | 3.55089  |
| IF_r2   | 5.29079   | 3.00041   | 3.26841   | 7.4928  | 1.47595  | 3.87162  | 5.10518  | 1.17162   | 2.87161   | 0         | 0.251538 | 0.880817  | 1.64361  | 1.10857  | 3.19911  | 7.29815  | 0        | 3.89981  | 0.706805 | 1.95188  | 0.956746  | 2.5177   |
| IF_r3   | 7.14225   | 2.7007    | 2.62977   | 10.1718 | 2.69724  | 3.37748  | 3.75562  | 0.497342  | 1.35334   | 0.237536  | 1.7793   | 2.07606   | 2.57482  | 0.783302 | 3.39677  | 7.4025   | 0        | 2.24153  | 2.00019  | 2.75783  | 1.52291   | 2.66984  |
| LSD_r1  | 0.0854261 | 0         | 0.0646585 | 7.60594 | 0.214857 | 0        | 0.186974 | 1.02291   | 6.42625   | 0         | 0.109872 | 0         | 0.717509 | 0.648323 | 0.154861 | 3.19524  | 0        | 0        | 0.205707 | 0.342709 | 0         | 0        |
| LSD_r2  | 0         | 0.258484  | 0.346907  | 7.83536 | 0.232382 | 0        | 0.205259 | 0.773706  | 6.68834   | 0         | 0.356664 | 0.278916  | 0.110761 | 0.3542   | 0.666259 | 2.87165  | 0        | 0.460385 | 0.222297 | 0.375119 | 0         | 0.149856 |
| LSD_r3  | 0         | 0         | 0.201206  | 9.81189 | 0.334695 | 0.117128 | 0.389207 | 1.06215   | 6.09885   | 0         | 0.228221 | 0         | 0.106434 | 0.674311 | 0.321381 | 2.88798  | 0        | 0.221062 | 0.320401 | 1.06962  | 0.108444  | 0.143199 |
| LMSD_r1 | 0.731058  | 0.676242  | 1.049     | 6.43256 | 2.44218  | 1.06716  | 1.22276  | 0.775829  | 1.31586   | 0.274027  | 0.416111 | 0.72728   | 0.680219 | 0        | 0.884752 | 2.48655  | 0.635369 | 0        | 1.85254  | 0.160519 | 0.0989706 | 0.519253 |
| LMSD_r2 | 0.957093  | 0.313251  | 0.597831  | 5.41979 | 2.47251  | 0.963491 | 0.4879   | 1.2787    | 0.640976  | 0         | 0.505627 | 0.252841  | 0.337184 | 0.105999 | 0.970356 | 3.64262  | 0        | 1.67994  | 1.42098  | 0.783721 | 0.0686932 | 0.180643 |
| LMSD_r3 | 0.570556  | 1.32222   | 1.29858   | 7.26146 | 1.19289  | 0.250287 | 0        | 1.02285   | 2.47305   | 0         | 0.365908 | 0.426848  | 1.13881  | 0        | 1.03524  | 3.07437  | 0.956942 | 0        | 2.17109  | 0.944592 | 0.232001  | 0.152465 |
| OL_r1   | 0.584972  | 0.406949  | 5.5453    | 6.92976 | 18.5367  | 0        | 0        | 3.49678   | 5.71079   | 0         | 1.50131  | 0.437988  | 0.700779 | 0.826484 | 3.05106  | 1.89314  | 0        | 5.81928  | 2.98844  | 10.4763  | 0.178461  | 0        |
| OL_r2   | 0.760499  | 0.0965626 | 7.79372   | 5.84258 | 9.74194  | 0.365259 | 0        | 1.90471   | 1.35823   | 0         | 0.711716 | 0.104036  | 0.331936 | 0.131377 | 4.44853  | 1.23809  | 2.25238  | 1.54278  | 1.99847  | 5.97359  | 0.0845499 | 0.223239 |
| OL_r3   | 0.606955  | 0.484265  | 6.43017   | 9.58827 | 11.7791  | 0.686963 | 0        | 1.34998   | 2.69573   | 0         | 1.00395  | 0.391275  | 1.14464  | 0.493948 | 4.32221  | 3.66833  | 0.968917 | 3.3518   | 2.71482  | 9.92298  | 0         | 0.139919 |
| R_r1    | 11.2666   | 2.81977   | 4.97168   | 46.6841 | 3.97407  | 8.5774   | 1.44716  | 10.5083   | 10.1381   | 0         | 1.97604  | 1.6516    | 13.7943  | 6.9322   | 5.64008  | 19.1615  | 0        | 2.46071  | 3.11708  | 25.6196  | 3.37976   | 1.48894  |
| R_r2    | 12.0112   | 2.525     | 5.2064    | 49.9368 | 5.03947  | 11.2275  | 1.28775  | 12.4032   | 7.36231   | 0         | 1.25722  | 0.956007  | 12.722   | 7.71321  | 5.57446  | 21.8041  | 0.537406 | 1.34996  | 2.52964  | 31.1563  | 1.79206   | 1.18372  |
| R_r3    | 9.59007   | 2.38154   | 3.70498   | 38.1759 | 5.12894  | 7.26006  | 1.24074  | 7.49777   | 6.73662   | 0         | 2.19557  | 1.56703   | 15.8799  | 6.55091  | 4.5632   | 18.7121  | 0.528171 | 1.71698  | 2.28447  | 28.2594  | 1.15967   | 1.52742  |
| S_r1    | 9.5969    | 4.86995   | 7.61429   | 31.6623 | 4.77526  | 3.04812  | 2.02075  | 3.31811   | 10.5716   | 0         | 5.4118   | 1.69712   | 4.06379  | 4.67188  | 7.86171  | 20.1078  | 1.67601  | 0.756001 | 3.76882  | 5.7621   | 1.56829   | 1.57215  |
| S_r2    | 7.67533   | 5.15741   | 5.1105    | 45.3766 | 5.36191  | 2.62655  | 2.1769   | 2.63789   | 8.25009   | 0         | 3.93008  | 1.81618   | 2.72858  | 3.90928  | 3.9295   | 36.9766  | 0        | 2.92181  | 2.82351  | 8.12313  | 1.21622   | 1.48974  |
| S_r3    | 8.3613    | 5.88753   | 6.54913   | 32.3969 | 6.13441  | 3.1808   | 3.04436  | 2.23487   | 12.9234   | 0         | 3.64091  | 1.6316    | 3.25086  | 2.97935  | 6.70354  | 30.1163  | 0.65991  | 1.89113  | 3.55205  | 5.45428  | 1.25136   | 1.75105  |
| YL_r1   | 0.376474  | 0.65652   | 5.84317   | 4.18729 | 1.06491  | 1.11776  | 2.67423  | 0.112673  | 0.461402  | 0         | 2.17819  | 0.707111  | 0.790331 | 0.178384 | 7.33742  | 1.83535  | 0        | 0.117232 | 0        | 1.31997  | 1.03525   | 2.27523  |
| YL_r2   | 0.56107   | 0.781155  | 5.81276   | 5.57953 | 1.17405  | 2.21746  | 4.87546  | 0         | 0.913871  | 0         | 2.28103  | 1.26133   | 1.12061  | 0.176421 | 8.90501  | 2.57503  | 0        | 0.465315 | 0.562216 | 0.931939 | 0.570776  | 3.45531  |
| YL_r3   | 0.850053  | 1.06611   | 6.02168   | 4.55736 | 0.907701 | 1.62499  | 3.333    | 0.0508532 | 0.346646  | 0         | 2.62092  | 0         | 2.29307  | 0.241053 | 7.43805  | 1.6547   | 0        | 1.00516  | 0.409051 | 2.2077   | 0.051912  | 2.05135  |

| Name    | CsDof45   | CsDof46  | CsDof47   | CsDof48  | CsDof49  | CsDof50  | CsDof51  | CsDof52  | CsDof53  | CsDof54   | CsDof55  | CsDof56  | CsDof57 | CsDof58  | CsDof59  | CsDof60  | CsDof61   | CsDof62  | CsDof63  | CsDof64  | CsDof65  | CsDof66   |
|---------|-----------|----------|-----------|----------|----------|----------|----------|----------|----------|-----------|----------|----------|---------|----------|----------|----------|-----------|----------|----------|----------|----------|-----------|
| C_r1    | 4.34786   | 0.291215 | 0         | 0.413968 | 2.22329  | 0        | 1.43036  | 0        | 0        | 0         | 0        | 0.722243 | 0       | 0        | 0        | 0.198386 | 2.06564   | 6.61315  | 0.188142 | 1.19812  | 0        | 0.500788  |
| C_r2    | 2.60391   | 0.388149 | 0         | 0.618096 | 1.07294  | 0        | 2.1511   | 0        | 0        | 0.121592  | 0        | 0.58548  | 0       | 0        | 0        | 0        | 2.05819   | 6.85126  | 0.875636 | 3.10194  | 0        | 0.914337  |
| C_r3    | 3.22037   | 0        | 0         | 1.17562  | 1.45261  | 0        | 1.26025  | 0        | 0        | 0.0424982 | 0        | 0.40946  | 0       | 0        | 0        | 0.229973 | 2.42659   | 6.9111   | 0.958075 | 3.30432  | 0        | 0.986423  |
| EMSD_r1 | 1.19428   | 1.37478  | 0         | 1.499    | 2.76568  | 2.36498  | 1.38253  | 0        | 0.689647 | 3.84      | 0.814517 | 0.777081 | 0       | 0.436245 | 1.49676  | 4.63186  | 0.236194  | 0.730105 | 0        | 0.769762 | 0        | 5.62683   |
| EMSD_r2 | 1.49483   | 2.44291  | 0         | 1.31311  | 4.63078  | 2.44377  | 1.61377  | 0        | 0.914033 | 4.07167   | 1.26328  | 0.339752 | 0       | 0        | 2.11134  | 3.77639  | 0         | 0.511146 | 0        | 1.01272  | 0        | 8.11117   |
| EMSD_r3 | 1.95579   | 1.431    | 0         | 1.50661  | 3.62833  | 1.95405  | 1.29494  | 0        | 1.69929  | 5.50979   | 0.252773 | 1.01092  | 0       | 0        | 2.01736  | 4.13835  | 0         | 0.878447 | 0        | 0.698436 | 0        | 3.28539   |
| ESD_r1  | 1.27339   | 0.813947 | 0         | 2.58074  | 4.94623  | 4.63507  | 2.46503  | 4.44805  | 1.81504  | 2.62229   | 4.07646  | 3.55377  | 3.8867  | 3.09198  | 5.92373  | 3.84696  | 0.68274   | 4.01367  | 0        | 0.664439 | 0        | 2.66214   |
| ESD_r2  | 0.552466  | 0.637097 | 0         | 1.93972  | 6.73042  | 7.00927  | 3.07165  | 5.44951  | 1.63071  | 4.28094   | 3.35354  | 1.91052  | 3.94356 | 2.11087  | 5.59958  | 3.81736  | 0.932321  | 1.69233  | 0.200247 | 1.00224  | 0        | 3.27729   |
| ESD_r3  | 0.995069  | 0        | 0         | 2.52674  | 5.69783  | 13.9262  | 3.41065  | 1.36029  | 4.34499  | 3.62658   | 0.463534 | 2.27593  | 4.47834 | 0.495055 | 10.3358  | 3.54391  | 2.18903   | 2.90309  | 0        | 0        | 0        | 3.03768   |
| F_r1    | 3.20892   | 2.90529  | 0         | 1.30505  | 3.82366  | 0        | 4.57162  | 0        | 0        | 2.31282   | 0        | 1.01336  | 0       | 0        | 0        | 2.75255  | 4.08254   | 2.05785  | 0.472118 | 2.7169   | 0        | 1.26137   |
| F_r2    | 2.32941   | 1.67496  | 0         | 1.6752   | 2.45388  | 0        | 3.30828  | 0        | 0        | 2.33172   | 0.2968   | 2.59959  | 0       | 0        | 0        | 2.75279  | 3.40775   | 2.40989  | 0        | 3.1847   | 0        | 0.289334  |
| F_r3    | 2.53917   | 2.52998  | 0         | 2.29324  | 2.54305  | 0.145423 | 4.23221  | 0        | 0        | 1.97998   | 0.750903 | 2.84752  | 0       | 0        | 0        | 2.19969  | 3.68181   | 3.26282  | 0.110972 | 1.717    | 0        | 0.597474  |
| GS_r1   | 1.84113   | 0        | 0.0994022 | 0.863795 | 0.438587 | 0        | 0.668427 | 0        | 0        | 1.43755   | 0        | 0.348105 | 0       | 0        | 0        | 0.894054 | 0.345176  | 0.181413 | 0.251756 | 0.040016 | 0        | 0.209098  |
| GS_r2   | 0.850622  | 0        | 0.045099  | 1.24612  | 0.925424 | 0.230494 | 0.613782 | 0        | 0        | 0.900483  | 0        | 0.168603 | 0       | 0        | 0        | 0.63777  | 0.0935731 | 0.23356  | 0.442387 | 0        | 0        | 0.159806  |
| GS_r3   | 0.740844  | 0        | 0         | 0        | 0.706103 | 0        | 0.333186 | 0        | 0        | 1.28092   | 0        | 0        | 0       | 0        | 0        | 1.03965  | 0         | 0.633149 | 0        | 0.418351 | 0        | 0.437087  |
| IF_r1   | 1.56936   | 1.63764  | 0         | 1.5313   | 2.24255  | 2.79474  | 3.5253   | 0        | 0        | 2.54022   | 0.964097 | 2.22269  | 0       | 0        | 0        | 1.65064  | 4.65367   | 5.02194  | 0.350077 | 3.54966  | 0        | 1.15956   |
| IF_r2   | 0.975639  | 2.68134  | 0.682236  | 0.952137 | 1.62704  | 0        | 2.41248  | 0        | 0        | 2.95068   | 0.593289 | 3.69114  | 0       | 0        | 0        | 2.50956  | 2.37595   | 2.91691  | 0.432887 | 2.75591  | 0        | 0.863948  |
| IF_r3   | 1.38037   | 1.18082  | 0         | 2.02079  | 1.72669  | 1.61815  | 3.64683  | 0        | 0        | 2.61002   | 0.20917  | 1.95947  | 0       | 0        | 0        | 1.85628  | 4.43814   | 3.90716  | 0.305693 | 2.72861  | 0        | 1.12002   |
| LSD_r1  | 0.745579  | 0.891555 | 0         | 0.415696 | 0.304379 | 0.253427 | 0.765513 | 0        | 0        | 6.15927   | 0        | 0.16085  | 0       | 0        | 0        | 3.98282  | 0         | 0.817825 | 0.1903   | 0        | 0        | 0.377858  |
| LSD_r2  | 0.230359  | 2.99855  | 0         | 0.786295 | 0.438456 | 0        | 1.03269  | 0        | 0        | 5.25455   | 0        | 0        | 0       | 0        | 0        | 4.30141  | 0.324188  | 0.68586  | 0        | 0.130624 | 0        | 0.956878  |
| LSD_r3  | 0.884879  | 1.86158  | 0         | 0.215831 | 0.842791 | 0        | 0.596048 | 0        | 0        | 5.15312   | 0        | 0.166919 | 0       | 0        | 0        | 4.34204  | 0.154624  | 0.848926 | 0        | 0        | 0        | 0.39261   |
| LMSD_r1 | 0.706336  | 0.272477 | 0         | 1.28048  | 0.673428 | 0        | 1.27154  | 0        | 0        | 2.53207   | 0        | 0.459242 | 0       | 0        | 0.177468 | 3.30554  | 0         | 1.29483  | 0        | 0.455445 | 0        | 0.11892   |
| LMSD_r2 | 0.560374  | 0.191763 | 0         | 1.64071  | 1.80248  | 0        | 1.51195  | 0        | 0        | 1.33201   | 0        | 0.371212 | 0       | 0        | 0        | 2.62111  | 0.681739  | 1.79562  | 0        | 0.553854 | 0        | 0.496023  |
| LMSD_r3 | 0.591416  | 0.969351 | 0         | 0.808105 | 1.46558  | 0.276872 | 0.851153 | 0        | 0        | 2.24965   | 0        | 0.358304 | 0       | 0        | 0        | 2.10257  | 0         | 1.41526  | 0        | 0.801519 | 0        | 0.279137  |
| OL_r1   | 8.73506   | 6.4854   | 0         | 1.42082  | 2.94833  | 0        | 2.9458   | 0.431414 | 0        | 1.5728    | 0        | 0.964222 | 0       | 0        | 0        | 1.36186  | 0.253098  | 5.44188  | 1.29046  | 0        | 0        | 0.429614  |
| OL_r2   | 4.39811   | 0.24155  | 0         | 0.336553 | 2.13561  | 0        | 1.93646  | 0        | 0        | 0.744092  | 0        | 1.36673  | 0       | 0        | 0        | 0.403032 | 0         | 2.50069  | 1.23472  | 0        | 0        | 0.61211   |
| OL_r3   | 8.21819   | 0.302337 | 0         | 1.37156  | 1.545    | 0        | 2.33126  | 0        | 0        | 2.70614   | 0        | 1.30604  | 0       | 0        | 0        | 0.909719 | 0.151055  | 3.41282  | 0.38675  | 0        | 0        | 1.15109   |
| R_r1    | 11.7651   | 4.62791  | 0         | 1.17447  | 4.01262  | 0        | 14.6416  | 0        | 0        | 1.46298   | 0        | 8.12851  | 0       | 0        | 0        | 0.920457 | 13.325    | 4.7579   | 0.58927  | 6.31836  | 0.141935 | 0.0647774 |
| R_r2    | 13.1      | 4.28358  | 0         | 1.06999  | 2.84338  | 0        | 14.1712  | 0        | 0        | 1.52415   | 0        | 8.31844  | 0       | 0        | 0        | 0.683321 | 12.3573   | 6.28581  | 1.31084  | 5.51684  | 0        | 0         |
| R_r3    | 6.68197   | 4.90381  | 0         | 0.692441 | 3.94392  | 0        | 16.9025  | 0        | 0        | 1.7365    | 0        | 11.9815  | 0       | 0        | 0        | 1.16126  | 10.0522   | 5.35164  | 0.84174  | 4.54524  | 0        | 0         |
| S_r1    | 3.39095   | 4.27996  | 0         | 3.37105  | 4.2663   | 0        | 5.9782   | 0        | 0        | 1.43586   | 0        | 5.41152  | 0       | 0        | 0        | 1.13645  | 14.4688   | 5.18594  | 0.685557 | 6.15107  | 0        | 0.0756503 |
| S_r2    | 2.74668   | 4.69401  | 0         | 2.67999  | 3.71368  | 0        | 6.20904  | 0        | 0        | 1.98839   | 0        | 4.48287  | 0       | 0        | 0        | 1.15963  | 18.0596   | 7.18151  | 1.42432  | 5.81264  | 0        | 0         |
| S_r3    | 2.85317   | 5.71358  | 0         | 3.00324  | 2.50262  | 0        | 4.85397  | 0        | 0        | 1.35985   | 0        | 4.18964  | 0       | 0        | 0        | 0.982311 | 17.3366   | 5.44037  | 1.6169   | 6.79943  | 0        | 0         |
| YL_r1   | 0         | 0        | 0         | 1.37363  | 0.223517 | 0        | 1.47575  | 0        | 0        | 1.01274   | 0        | 1.59506  | 0       | 0        | 0        | 0        | 1.63709   | 3.80411  | 0.418721 | 3.1842   | 0        | 0.970836  |
| YL_r2   | 0         | 0        | 0         | 1.93128  | 0.221862 | 0        | 1.77933  | 0        | 0        | 0.804656  | 0        | 0.792628 | 0       | 0        | 0        | 0.435523 | 4.37499   | 2.58518  | 0        | 4.34089  | 0        | 0.137462  |
| YL_r3   | 0.0529407 | 0.2928   | 0         | 1.49817  | 0.554859 | 0        | 1.76068  | 0        | 0        | 1.326     | 0        | 0.400238 | 0       | 0        | 0        | 0.693098 | 2.5083    | 3.11875  | 0.47108  | 3.65051  | 0        | 1.25093   |

| Name    | CsDof67  | CsDof68  | CsDof69  | CsDof70   | CsDof71 | CsDof72  | CsDof73  | CsDof74 | CsDof75  | CsDof76   | CsDof77  | CsDof78  | CsDof79   | CsDof80  | CsDof81  | CsDof82   | CsDof83   | CsDof84  | CsDof85   | CsDof86  | CsDof87   | CsDof88  |
|---------|----------|----------|----------|-----------|---------|----------|----------|---------|----------|-----------|----------|----------|-----------|----------|----------|-----------|-----------|----------|-----------|----------|-----------|----------|
| C_r1    | 0        | 0        | 1.43218  | 0         | 0       | 0        | 0        | 0       | 0.111138 | 0.207127  | 0.126994 | 3.62026  | 0         | 0        | 0.738711 | 1.85574   | 2.44444   | 0        | 0.637256  | 0.809403 | 1.71899   | 1.52197  |
| C_r2    | 0        | 0        | 1.52035  | 0         | 0       | 0        | 0        | 0       | 0        | 0.0687248 | 0.421589 | 2.58658  | 0.10847   | 0        | 1.35055  | 1.37149   | 3.2495    | 0.28112  | 0.79819   | 0.359432 | 1.70853   | 1.91057  |
| C_r3    | 0        | 0        | 1.72674  | 0         | 0       | 0        | 0        | 0       | 0.360655 | 0.072026  | 0.147139 | 3.57298  | 0.0756019 | 0        | 1.75274  | 1.28821   | 3.234     | 0.581637 | 0.640559  | 0.685929 | 1.92556   | 1.60542  |
| EMSD_r1 | 0.365925 | 2.5164   | 1.23046  | 0         | 0       | 0.640966 | 0.488385 | 0       | 1.78695  | 0.333337  | 0        | 1.04709  | 0         | 0        | 1.17728  | 0.327767  | 1.39301   | 0.651942 | 0         | 1.27693  | 0.727504  | 0.540021 |
| EMSD_r2 | 0.161827 | 2.70181  | 1.41384  | 0         | 0       | 0.282837 | 1.73822  | 0       | 3.44578  | 0.146001  | 0.089423 | 0.785566 | 0.229516  | 0.241209 | 2.20506  | 0         | 2.33107   | 0.584634 | 0.449848  | 0.943923 | 0.581214  | 0.237711 |
| EMSD_r3 | 0.225984 | 2.88386  | 2.6858   | 0         | 0       | 0        | 0.612279 | 0       | 2.26623  | 0         | 0.123442 | 1.7105   | 0.159054  | 0.167313 | 1.62185  | 0         | 2.72416   | 0.833834 | 0.685695  | 0.264774 | 0.397196  | 0        |
| ESD_r1  | 0.214497 | 4.84328  | 2.46818  | 1.4872    | 3.18354 | 16.2644  | 2.61089  | 6.95696 | 3.49115  | 0.0956491 | 0        | 0.9426   | 0         | 0        | 1.54087  | 0.191345  | 3.88301   | 1.97141  | 0.391779  | 0.753342 | 0.963432  | 0.469978 |
| ESD_r2  | 0.248513 | 6.58124  | 2.97643  | 4.25107   | 7.14353 | 10.3304  | 2.73691  | 1.50776 | 2.55091  | 0.539192  | 0.133034 | 1.6387   | 0.172612  | 0        | 0.785527 | 0.441005  | 4.44434   | 4.29007  | 0.0731156 | 3.22777  | 0.61221   | 0.179095 |
| ESD_r3  | 0        | 4.52291  | 2.15675  | 0.604059  | 2.83536 | 10.6732  | 5.51287  | 1.48517 | 1.66612  | 0.194494  | 0.473798 | 0.699489 | 0         | 0        | 1.01674  | 0         | 4.17737   | 1.44783  | 0         | 1.45064  | 0.643898  | 0        |
| F_r1    | 0        | 1.70274  | 4.33647  | 0         | 0       | 0        | 0        | 0       | 1.12066  | 1.04476   | 0.639669 | 1.8741   | 0.410224  | 0        | 4.17167  | 1.03372   | 6.13894   | 0        | 1.96817   | 1.34753  | 1.79778   | 2.12416  |
| F_r2    | 0        | 0.261238 | 3.97496  | 0.124083  | 0       | 0        | 0        | 0       | 1.54164  | 1.07765   | 0        | 1.18093  | 0         | 0.198054 | 2.55664  | 2.37737   | 3.42526   | 2.41112  | 1.80265   | 1.24216  | 0.692544  | 2.73243  |
| F_r3    | 0.135148 | 0.53121  | 4.35201  | 0.0642342 | 0       | 0        | 0        | 0       | 1.46226  | 1.11638   | 0.302926 | 1.4482   | 0.483557  | 0.203048 | 4.14186  | 3.63688   | 4.74886   | 2.85904  | 1.91957   | 3.13703  | 1.42702   | 2.50213  |
| GS_r1   | 0.154627 | 0        | 0.828629 | 0         | 0       | 0        | 0        | 0       | 1.37311  | 0.103727  | 0.424216 | 0.557702 | 0.163725  | 0.114776 | 0.7413   | 0.0690075 | 0         | 0.141501 | 0.685012  | 1.35647  | 0.647745  | 1.01783  |
| GS_r2   | 0.357656 | 0        | 0.506996 | 0         | 0       | 0        | 0        | 0       | 0.60532  | 0.349146  | 0.202521 | 0.50824  | 0         | 0.459446 | 0.202841 | 0.83617   | 0.0549475 | 0.49546  | 0.734366  | 1.07515  | 0.525869  | 1.1726   |
| GS_r3   | 0        | 0        | 2.00165  | 0         | 0       | 0        | 0        | 0       | 1.55262  | 0         | 0.443338 | 0.648737 | 0         | 1.19675  | 0.643687 | 0         | 0         | 0        | 0.495142  | 1.87635  | 0.784689  | 0        |
| IF_r1   | 0        | 1.26897  | 2.64735  | 0         | 0       | 0        | 0        | 0       | 0.822659 | 1.7239    | 0.470542 | 1.88713  | 0.606388  | 0        | 1.03064  | 1.15248   | 2.272     | 2.38782  | 4.05033   | 0        | 1.995     | 2.19963  |
| IF_r2   | 0.531311 | 1.56508  | 3.51352  | 0         | 0       | 0        | 0        | 0       | 2.55628  | 0         | 0.292118 | 1.06748  | 0         | 0        | 1.27473  | 0.474458  | 2.81199   | 0        | 1.954     | 1.24197  | 1.20297   | 4.27965  |
| IF_r3   | 0.187427 | 0.736203 | 2.87455  | 0         | 0       | 0        | 0        | 0       | 0.904082 | 1.43238   | 0.413113 | 0.830903 | 0.928685  | 0        | 0.300082 | 0.837299  | 2.83761   | 0        | 2.70905   | 1.31327  | 1.27839   | 3.4357   |
| LSD_r1  | 0.234386 | 0        | 0.479058 | 0         | 0       | 0        | 0        | 0       | 4.69033  | 0         | 0.766678 | 0        | 0         | 0.173338 | 0        | 0         | 0         | 0        | 0.0709044 | 0.274822 | 0.0746301 | 1.53691  |
| LSD_r2  | 2.33666  | 0        | 0.413614 | 0         | 0       | 0        | 0        | 0       | 2.78022  | 0.112407  | 0        | 0        | 0         | 0.379603 | 0        | 0         | 0         | 0.499845 | 0.152342  | 1.84068  | 0.318719  | 1.86897  |
| LSD_r3  | 0.244273 | 0        | 0.497344 | 0         | 0       | 0        | 0        | 0       | 2.66774  | 0         | 0.132775 | 0.193356 | 0         | 0.721372 | 0        | 0         | 0         | 0        | 0.07356   | 0.286738 | 0.23206   | 2.13188  |
| LMSD_r1 | 0.86881  | 0        | 0.636568 | 0         | 0       | 0        | 0        | 0       | 2.11403  | 0         | 0.120607 | 0.530608 | 0.154513  | 0.162322 | 0.697876 | 0         | 0.495308  | 0        | 0.473146  | 0.252929 | 0.250482  | 0.479958 |
| LMSD_r2 | 1.06529  | 0        | 1.00925  | 0         | 0       | 0        | 0        | 0       | 1.6883   | 0.06841   | 0.167709 | 0.797279 | 0.646318  | 0        | 1.21826  | 0.13597   | 0.115199  | 0        | 0.327583  | 0.177726 | 0.494243  | 0.669502 |
| LMSD_r3 | 0        | 0        | 0.426115 | 0         | 0       | 0        | 0        | 0       | 2.10707  | 0.462091  | 0.424693 | 0.621471 | 0.181777  | 0.382126 | 0        | 0         | 0         | 0.465004 | 0.869625  | 0        | 0.292345  | 1.88284  |
| OL_r1   | 0        | 0        | 3.1134   | 0         | 0       | 0        | 0        | 0       | 1.52568  | 0         | 4.79349  | 6.6913   | 0         | 0        | 0.316685 | 1.06053   | 6.28818   | 2.15926  | 0.121548  | 5.08514  | 2.11759   | 0        |
| OL_r2   | 0        | 0        | 1.93894  | 0         | 0       | 0        | 0        | 0       | 0.813847 | 0.0841969 | 0.517511 | 3.31685  | 0         | 0        | 3.02883  | 0.169475  | 3.57567   | 0.707644 | 0         | 2.23272  | 2.65497   | 0        |
| OL_r3   | 0        | 0        | 1.9452   | 0         | 0       | 0        | 0        | 0       | 1.02044  | 0.211156  | 4.02245  | 3.30873  | 0         | 0        | 2.27701  | 0.424601  | 6.27285   | 0.884617 | 0.143914  | 2.23615  | 3.14199   | 0.520472 |
| R_r1    | 0        | 0        | 12.4958  | 0         | 0       | 0        | 0        | 0       | 1.37736  | 0.480799  | 6.24374  | 1.00406  | 0.169822  | 0        | 6.07043  | 2.91357   | 13.0997   | 0.681061 | 6.07185   | 8.40648  | 4.16381   | 7.57131  |
| R_r2    | 0        | 0        | 17.9148  | 0         | 0       | 0        | 0        | 0       | 0.830665 | 0.832793  | 7.38921  | 1.22466  | 0.188949  | 0        | 5.78759  | 4.19983   | 14.1681   | 1.51023  | 8.01939   | 10.4481  | 4.49132   | 9.01105  |
| R_r3    | 0.129314 | 0        | 20.8091  | 0         | 0       | 0        | 0        | 0       | 1.42562  | 0.577433  | 8.36221  | 1.08649  | 0.456038  | 0        | 1.75554  | 2.30774   | 15.9086   | 1.42322  | 7.41345   | 11.652   | 3.0349    | 6.89911  |
| S_r1    | 0        | 0        | 7.48231  | 0         | 0       | 0        | 0        | 0       | 0.603718 | 0.624702  | 0.76747  | 2.07001  | 0.197871  | 0.104085 | 2.91523  | 1.00323   | 6.99086   | 5.7271   | 1.10759   | 5.27784  | 3.43074   | 6.76783  |
| S_r2    | 0        | 0        | 6.29669  | 0         | 0       | 0        | 0        | 0       | 1.20765  | 0.69209   | 1.38173  | 1.93687  | 0         | 0        | 4.03778  | 1.3896    | 6.16164   | 3.96807  | 1.00283   | 5.48353  | 2.82541   | 12.4981  |
| S_r3    | 0        | 0        | 5.87275  | 0         | 0       | 0        | 0        | 0       | 0.708701 | 0.806309  | 0.721416 | 1.96813  | 0         | 0.122622 | 4.75908  | 1.18435   | 4.49313   | 7.78464  | 1.09757   | 3.71372  | 3.66932   | 9.42145  |
| YL_r1   | 0        | 0        | 1.26655  | 0         | 0       | 0        | 0        | 0       | 0        | 0.343646  | 0        | 2.05191  | 0.362643  | 0        | 1.23273  | 1.14873   | 2.9116    | 0.475998 | 0.859482  | 0        | 2.34494   | 1.50338  |
| YL_r2   | 0        | 0        | 0.838396 | 0         | 0       | 0        | 0        | 0       | 0.122007 | 0.454733  | 0.418311 | 2.03773  | 0.358594  | 0        | 1.62315  | 1.13292   | 2.87709   | 1.8531   | 1.01009   | 1.78005  | 2.13163   | 0.92879  |
| YL_r3   | 0        | 0        | 1.14351  | 0         | 0       | 0        | 0        | 0       | 0.166481 | 0.413574  | 0.190346 | 2.77913  | 0         | 0        | 0.83222  | 0.51663   | 1.57305   | 2.97506  | 0.529525  | 0.135525 | 1.4328    | 0.761609 |

| Name    | CsDof89  | CsDof90  | CsDof91   | CsDof92  | CsDof93  | CsDof94   | CsDof95  | CsDof96  | CsDof97  | CsDof98  | CsDof99   | CsDof100  | CsDof101 | CsDof102 | CsDof103  |
|---------|----------|----------|-----------|----------|----------|-----------|----------|----------|----------|----------|-----------|-----------|----------|----------|-----------|
| C_r1    | 0.549742 | 4.53493  | 0         | 0        | 1.88142  | 0         | 2.25133  | 1.24413  | 7.84736  | 1.80057  | 2.44593   | 0.63766   | 0        | 0.219748 | 0.724943  |
| C_r2    | 0.547635 | 4.17206  | 0         | 0        | 1.12582  | 0.142445  | 2.12375  | 2.48499  | 8.30435  | 1.79418  | 1.77823   | 0.677411  | 0        | 0        | 0.206174  |
| C_r3    | 0.382097 | 4.5876   | 0         | 0        | 2.17744  | 0.0495379 | 2.44411  | 1.72594  | 7.2274   | 1.39021  | 2.05163   | 0.768359  | 0        | 0        | 0.072026  |
| EMSD_r1 | 1.9825   | 1.49291  | 0         | 0.214684 | 0.899154 | 0         | 2.09384  | 0.393531 | 2.04734  | 0        | 1.68437   | 5.52552   | 0        | 0.697495 | 0         |
| EMSD_r2 | 1.16077  | 1.30773  | 0         | 0.094249 | 1.05698  | 0         | 2.00322  | 0.348539 | 1.71906  | 0.105548 | 1.3949    | 8.08199   | 0        | 0.154102 | 0.0730003 |
| EMSD_r3 | 1.60422  | 1.80045  | 0         | 0.130204 | 0.550885 | 0         | 2.99292  | 0.731538 | 2.05872  | 0        | 1.01823   | 6.81834   | 0        | 1.28958  | 0.10051   |
| ESD_r1  | 1.01706  | 1.04707  | 0.287281  | 0        | 1.22113  | 0         | 5.14706  | 1.85093  | 5.77922  | 0        | 0         | 4.95251   | 0        | 1.83647  | 0         |
| ESD_r2  | 0.577446 | 2.36077  | 0         | 0        | 1.40173  | 0         | 2.47712  | 1.88378  | 3.42529  | 0.474372 | 0.486733  | 2.53872   | 0.489069 | 1.65087  | 0.215677  |
| ESD_r3  | 0.255614 | 2.32307  | 0         | 0        | 2.41455  | 0         | 7.97677  | 0.897081 | 2.58718  | 0        | 0.217929  | 1.90293   | 0.571981 | 5.19132  | 0.194494  |
| F_r1    | 0.691834 | 1.81961  | 0         | 0.33706  | 5.19329  | 0         | 4.18001  | 4.35509  | 4.27856  | 0.377377 | 2.64169   | 0.642359  | 0.777029 | 1.65119  | 0.783568  |
| F_r2    | 0.635024 | 2.02583  | 0         | 0.154673 | 3.25545  | 0.24682   | 3.01275  | 3.43872  | 3.18762  | 0.693059 | 2.82698   | 0.589422  | 0.356808 | 2.78599  | 0.957913  |
| F_r3    | 1.63609  | 1.91361  | 0         | 0.717695 | 3.66209  | 0.251422  | 6.44004  | 3.48464  | 5.39573  | 1.42574  | 2.36605   | 0.456271  | 0.275068 | 3.22219  | 0.806276  |
| GS_r1   | 0.367369 | 0.997873 | 0.207452  | 0.22366  | 0.566452 | 0         | 0.356161 | 0.250079 | 0.106219 | 0.15045  | 0.0777951 | 0.681632  | 0        | 0        | 0.276605  |
| GS_r2   | 0.240379 | 0.397167 | 0.220923  | 0.17048  | 0.589849 | 0         | 0.322011 | 0.115069 | 0.374274 | 0.285278 | 0.130409  | 0.610045  | 0        | 0.170731 | 0.432276  |
| GS_r3   | 0        | 1.44018  | 0         | 0        | 2.6228   | 0         | 0.413753 | 0        | 0        | 0        | 0         | 0.44521   | 0        | 0        | 0         |
| IF_r1   | 0.764415 | 1.52495  | 0         | 0        | 2.80062  | 0         | 3.2908   | 2.32503  | 8.43531  | 0.556874 | 1.72495   | 1.41766   | 0        | 1.22943  | 0.766179  |
| IF_r2   | 0.948452 | 1.65939  | 0.356937  | 0        | 2.16444  | 0         | 2.7255   | 3.43596  | 4.63429  | 0.34518  | 3.48277   | 0.586713  | 0        | 1.01135  | 1.19099   |
| IF_r3   | 1.1175   | 0.83854  | 0         | 0.217745 | 1.37562  | 0.173872  | 2.79495  | 5.45226  | 4.91757  | 0.609892 | 3.88432   | 0.622291  | 0.376806 | 0.892131 | 1.34812   |
| LSD_r1  | 0.553639 | 0.103493 | 0         | 0        | 0        | 0         | 0        | 1.77099  | 0.852091 | 0        | 0.117089  | 0.641636  | 0        | 0        | 0         |
| LSD_r2  | 0.150566 | 0.223706 | 0.170813  | 0        | 0        | 0         | 0.129137 | 0.843726 | 0.575899 | 0        | 0.126867  | 0.557343  | 0        | 0        | 0         |
| LSD_r3  | 0.43159  | 0.3224   | 0         | 0        | 0.198084 | 0         | 0        | 1.84665  | 0.774269 | 0.15729  | 0.48652   | 1.06677   | 0.162058 | 0.2322   | 0         |
| LMSD_r1 | 0.782393 | 0.78478  | 0.146972  | 0        | 1.77686  | 0         | 0.225239 | 1.86966  | 2.0181   | 0        | 0.996493  | 0.242224  | 0        | 0.620822 | 0.0985657 |
| LMSD_r2 | 0.5444   | 1.1574   | 0.204801  | 0.176793 | 0.744624 | 0         | 0.62601  | 1.4757   | 2.59173  | 0        | 0.615368  | 0.084209  | 0        | 0.869254 | 0         |
| LMSD_r3 | 0.153159 | 0.574852 | 0         | 0        | 0        | 0         | 0.132118 | 2.21134  | 2.01082  | 0        | 0.909128  | 0.568649  | 0        | 0.488632 | 0.115523  |
| OL_r1   | 1.17889  | 8.13618  | 0         | 0        | 0.967846 | 0         | 5.6928   | 0        | 4.36753  | 3.86076  | 0         | 1.09404   | 0        | 1.1301   | 0.177725  |
| OL_r2   | 1.34564  | 4.4408   | 0         | 0        | 3.85849  | 0         | 2.50863  | 0        | 1.72475  | 1.47109  | 0         | 1.14342   | 0        | 0        | 0.336788  |
| OL_r3   | 1.6868   | 6.72425  | 0         | 0        | 2.12713  | 0         | 3.50813  | 0.257261 | 2.81149  | 1.84384  | 0.118886  | 0.651566  | 0        | 0.453109 | 0.527889  |
| R_r1    | 0.427391 | 1.75435  | 0         | 0        | 9.33011  | 0.112183  | 9.55505  | 9.82598  | 6.01937  | 3.03835  | 6.31995   | 0.264029  | 0        | 0.921799 | 1.22871   |
| R_r2    | 1.10994  | 1.42071  | 0         | 0        | 6.77268  | 0.873135  | 12.6149  | 8.88173  | 5.42278  | 4.42147  | 4.7577    | 0.367378  | 0        | 0.384318 | 1.54662   |
| R_r3    | 0.613773 | 2.12622  | 0         | 0        | 2.52522  | 0.119855  | 13.4186  | 7.53063  | 5.14452  | 4.86037  | 5.26265   | 0.782847  | 0.172619 | 1.23031  | 0.808406  |
| S_r1    | 1.33003  | 4.16526  | 0.0939769 | 0        | 6.05575  | 0.130306  | 4.43672  | 12.4519  | 10.4288  | 2.72539  | 7.38462   | 0.0770756 | 0        | 3.07725  | 1.99905   |
| S_r2    | 1.61175  | 3.96027  | 0         | 0        | 5.06424  | 0.180493  | 3.76588  | 12.4108  | 12.05    | 5.78769  | 6.81786   | 0.213485  | 0        | 1.66792  | 0.778601  |
| S_r3    | 0.977334 | 3.28249  | 0         | 0        | 6.46762  | 0.30781   | 5.04242  | 13.6594  | 10.1363  | 4.70313  | 5.78099   | 0.181132  | 0        | 2.37115  | 0.806309  |
| YL_r1   | 0.304763 | 2.73589  | 0         | 0        | 0.837443 | 0         | 1.4432   | 4.17147  | 2.93287  | 1.66515  | 3.99734   | 0.847807  | 0        | 0.245086 | 0.572744  |
| YL_r2   | 0.301837 | 4.86491  | 0         | 0        | 1.44695  | 0         | 1.43099  | 5.74459  | 3.2595   | 2.14225  | 3.70827   | 0.700144  | 0        | 0.483023 | 0.909465  |
| YL_r3   | 1.09908  | 3.03542  | 0         | 0        | 1.88432  | 0         | 1.77545  | 2.87247  | 3.22938  | 1.05044  | 4.7117    | 1.78412   | 0        | 0.440697 | 0.46527   |
