# Supplementary material for: Genome-wide identification and functional analysis of Dof transcription factor family in Camelina sativa
Source: PubMed Central journal article supplement (PMC9730592; doi:10.1186/s12864-022-09056-9), 2022-12-08
Supplement: 12864_2022_9056_MOESM10_ESM.pdf [file 12864_2022_9056_MOESM10_ESM.pdf]

| Name    | DH55_root_rep1 | DH55_root_rep2 | DH55_root_rep3 | DH55_shoot_rep1 | DH55_shoot_rep2 | DH55_shoot_rep3 | DH55_salt_root_rep1 | DH55_salt_root_rep2 | DH55_salt_root_rep3 | DH55_salt_shoot_rep1 | DH55_salt_shoot_rep2 | DH55_salt_shoot_rep3 |
|---------|----------------|----------------|----------------|-----------------|-----------------|-----------------|---------------------|---------------------|---------------------|----------------------|----------------------|----------------------|
| CsDOF41 | 13             | 15             | 10             | 19              | 14              | 16              | 11                  | 12                  | 11                  | 8                    | 9                    | 9                    |
| CsDOF42 | 72             | 71             | 63             | 116             | 76              | 92              | 7                   | 7                   | 6                   | 8                    | 7                    | 10                   |
| CsDOF43 | 6              | 6              | 4              | 7               | 5               | 4               | 1                   | 1                   | 1                   | 1                    | 1                    | 1                    |
| CsDOF44 | 3              | 3              | 4              | 5               | 4               | 5               | 2                   | 3                   | 3                   | 2                    | 1                    | 1                    |
| CsDOF45 | 26             | 30             | 28             | 90              | 83              | 84              | 17                  | 17                  | 23                  | 47                   | 50                   | 43                   |
| CsDOF46 | 11             | 11             | 7              | 7               | 7               | 6               | 8                   | 8                   | 7                   | 4                    | 3                    | 4                    |
| CsDOF47 | -              | -              | -              | -               | -               | -               | -                   | -                   | -                   | -                    | -                    | -                    |
| CsDOF48 | 8              | 8              | 9              | 12              | 9               | 13              | 3                   | 4                   | 5                   | 2                    | 3                    | 4                    |
| CsDOF49 | 21             | 21             | 14             | 21              | 18              | 21              | 16                  | 14                  | 13                  | 11                   | 9                    | 10                   |
| CsDOF50 | -              | -              | -              | -               | -               | -               | -                   | -                   | -                   | -                    | -                    | -                    |
| CsDOF51 | 36             | 38             | 39             | 32              | 29              | 25              | 11                  | 10                  | 8                   | 10                   | 10                   | 12                   |
| CsDOF52 | -              | -              | -              | -               | -               | -               | -                   | -                   | -                   | -                    | -                    | -                    |
| CsDOF53 | -              | -              | -              | -               | -               | -               | -                   | -                   | -                   | -                    | -                    | -                    |
| CsDOF54 | 4              | 4              | 5              | 23              | 14              | 20              | 1                   | 1                   | 1                   | 10                   | 7                    | 11                   |
| CsDOF55 | -              | -              | -              | -               | -               | -               | -                   | -                   | -                   | -                    | -                    | -                    |
| CsDOF56 | 26             | 28             | 30             | 21              | 20              | 24              | 8                   | 7                   | 9                   | 8                    | 7                    | 7                    |
| CsDOF57 | -              | -              | -              | -               | -               | -               | -                   | -                   | -                   | -                    | -                    | -                    |
| CsDOF58 | -              | -              | -              | -               | -               | -               | -                   | -                   | -                   | -                    | -                    | -                    |
| CsDOF59 | -              | -              | -              | -               | -               | -               | -                   | -                   | -                   | -                    | -                    | -                    |
| CsDOF60 | 3              | 3              | 4              | 15              | 9               | 12              | 1                   | 1                   | 1                   | 10                   | 5                    | 15                   |
| CsDOF61 | 15             | 17             | 14             | 17              | 24              | 17              | 5                   | 5                   | 3                   | 3                    | 6                    | 5                    |
| CsDOF62 | 6              | 6              | 6              | 25              | 17              | 15              | 10                  | 9                   | 8                   | 18                   | 20                   | 16                   |
| CsDOF63 | 2              | 1              | 1              | 8               | 5               | 7               | 1                   | 1                   | 2                   | 3                    | 2                    | 2                    |
| CsDOF64 | 6              | 6              | 5              | 9               | 7               | 7               | 3                   | 3                   | 3                   | 3                    | 4                    | 3                    |
| CsDOF65 | -              | -              | -              | -               | -               | -               | -                   | -                   | -                   | -                    | -                    | -                    |
| CsDOF66 | -              | -              | -              | -               | -               | -               | -                   | -                   | -                   | -                    | -                    | -                    |
| CsDOF67 | -              | -              | -              | -               | -               | -               | -                   | -                   | -                   | -                    | -                    | -                    |
| CsDOF68 | -              | -              | -              | -               | -               | -               | -                   | -                   | -                   | -                    | -                    | -                    |
| CsDOF69 | 36             | 40             | 37             | 33              | 30              | 28              | 11                  | 9                   | 9                   | 10                   | 10                   | 13                   |
| CsDOF70 | -              | -              | -              | -               | -               | -               | -                   | -                   | -                   | -                    | -                    | -                    |
| CsDOF71 | -              | -              | -              | -               | -               | -               | -                   | -                   | -                   | -                    | -                    | -                    |
| CsDOF72 | -              | -              | -              | -               | -               | -               | -                   | -                   | -                   | -                    | -                    | -                    |
| CsDOF73 | -              | -              | -              | -               | -               | -               | -                   | -                   | -                   | -                    | -                    | -                    |
| CsDOF74 | -              | -              | -              | -               | -               | -               | -                   | -                   | -                   | -                    | -                    | -                    |
| CsDOF75 | 3              | 3              | 4              | 19              | 9               | 16              | 1                   | 1                   | 1                   | 7                    | 5                    | 8                    |
| CsDOF76 | 2              | 3              | 2              | 3               | 3               | 1               | 1                   | 1                   | 1                   | 0                    | 0                    | 0                    |
| CsDOF77 | 15             | 15             | 14             | 24              | 18              | 23              | 2                   | 1                   | 2                   | 4                    | 3                    | 4                    |
| CsDOF78 | 9              | 7              | 6              | 17              | 17              | 20              | 10                  | 9                   | 9                   | 6                    | 6                    | 6                    |
| CsDOF79 | -              | -              | -              | -               | -               | -               | -                   | -                   | -                   | -                    | -                    | -                    |
| CsDOF80 | 1              | 1              | 0              | 6               | 3               | 3               | 0                   | 0                   | 0                   | 0                    | 0                    | 0                    |
| CsDOF81 | 7              | 7              | 8              | 9               | 7               | 7               | 1                   | 1                   | 1                   | 1                    | 1                    | 1                    |
