# Supplementary material for: Genome-wide identification and functional analysis of Dof transcription factor family in Camelina sativa
Source: PubMed Central journal article supplement (PMC9730592; doi:10.1186/s12864-022-09056-9), 2022-12-08
Supplement: 12864_2022_9056_MOESM11_ESM.pdf [file 12864_2022_9056_MOESM11_ESM.pdf]

| Name          | Gene ID        | Promoter sequence                                                                                                                                                                                                                                                                                                                                                                                                                                                                                                                                                                                                                                                                                                                                                                                                                                                                                                                                                                                                                                                                                                                                                                                                                                                                                                                                                                                                                                                                                                                                                                                                                                                                                                                                                                                                                                                                                                                                                                                                                                                                                                                                     |
|---------------|----------------|-------------------------------------------------------------------------------------------------------------------------------------------------------------------------------------------------------------------------------------------------------------------------------------------------------------------------------------------------------------------------------------------------------------------------------------------------------------------------------------------------------------------------------------------------------------------------------------------------------------------------------------------------------------------------------------------------------------------------------------------------------------------------------------------------------------------------------------------------------------------------------------------------------------------------------------------------------------------------------------------------------------------------------------------------------------------------------------------------------------------------------------------------------------------------------------------------------------------------------------------------------------------------------------------------------------------------------------------------------------------------------------------------------------------------------------------------------------------------------------------------------------------------------------------------------------------------------------------------------------------------------------------------------------------------------------------------------------------------------------------------------------------------------------------------------------------------------------------------------------------------------------------------------------------------------------------------------------------------------------------------------------------------------------------------------------------------------------------------------------------------------------------------------|
| <i>CsDof4</i> | Csa02g067130.1 | <p>ACATGCATTTAATCTATACTACTTTTTTCGTTTTGTAATAGAAAAGAAACATATTTTCAGTAGACCAACAAAATAATCACTGTTTACA<br/> AAAAACAAAACCAAAAAATCACTAGAGAATCAACAACTATTTTATGGTAATAGTTTGGAGAGTAGGCTAAGTTACACATTTT<br/> CTCTCCACGACACATGGTTCAAAAAATCGTAATAATATACTCCATAAGATTCTACAGATTAAGCAACTACTATAATATAGTATGAT<br/> GTAACATATGTGTGGATATGGTCTTAGACCAAATCTCGGTCTCATAGAAGTGTCTTCCCGAAAACCGATGTGTGATTGTGTCTCT<br/> ATGAACCTTAAAAATCCCATCGGATAATGCAAGCACATCATGATGATGAGCTATATACAACACATTGTCCGGCAATTTATTTGCTT<br/> TTACTTCATCATGTGTTCTATTTACATATCTTATTATTGGTAATATATAAAGCAATATGTACCTAGAAATTTTATTCACATTTTGG<br/> AAAAATATATTTCTTTAATATCCGTAAGAAGTATTTAGTTTGTGTTACTGATGACAGTGTTCAGATTTAAAAACACACATATTT<br/> AACCATTTTCAATTTTGAATATGTAATCACTACTGACTTCTACACAACAAATCATTGACAATATGTCTCAACGAATTCGATAAGTAAAA<br/> TAGAGGCATAAAATTAAGAAGGAAAGAACTGTAGCCCAATATGTTTTGACAAAAATAGAAACATTTCTGTCTATCAAAATAAGAGA<br/> ATCTATATATATAAATGACATTTATGCGTCTCAATGCAATAAAATCCCATGCTAAGAAACCAAAATACTAATATAAATTCGAG<br/> TATCTGTAATGTTTTGCTTTAAACATGGAATAGAATGAACGATCGAAATAGAAAATACATATACTTTGTTGTACGAACTACGAAG<br/> GTCATTTGAAACGGTAAGGGTCCATTTAGGAAGAAACAAGACATTTGCGATGAGTACGGGACCCGCTGTGGTACAACTCAACGGACC<br/> ATTGGGACATAAAACACAGAAATGACAACGAAGCTGAGTGGCGTGGGAATCCGACGTCGAACTCCAACCATCTCTCATCCATCATCGTA<br/> CGTTACTATTCTTGAATCATATAGATCCGATATCACATTTTGTAAACGACGACTGCAACTCATTCTTATATAAAGTTGAC<br/> ATCTTAAACGATACATTTTGGTGGAGTGGCTAAACGAGCTTAGTGATTTTCCGGATATTTCCGATGTTAGGCTACAAGATTT<br/> TTGTTTTCTACCTCAATATAAACTACAATTTGATTAGTAAAAGTATTGTTTTTTTCGTAAGATATTATACAGTCAAAATATACAAAT<br/> GTTAGATTATTTGGTAAATATGTTAAATATGATTAGTATTATTTTAAATCATCCAAAACATTAGTATTTCCGAGCAATAAAATAACT<br/> TTTTTTTTGAAAGTACTCTTAACTAGTCTTGAAGAGAGATGGTAAACACATTTAGTTTATATGTTTCCACATGCTTTATCAAACTA<br/> CTAATTATGTAGAGATAAAATTCATAATATGGTTACTGTATGTAGAATTTTGTTCACATTTATAAATGAATAAACGGCGGCTTATG<br/> TCTGTTCCAAATCAGTTCGAAATGGTTACATTTCTTCTTCTCATACCACATTTGTTTTAAAAATAAATAAATATTGAATAAA<br/> ATAAATAGAGATCGAGGTCAACAAGAATTTGTTCTCTCTCTGCTCCACATTTCCATGCTCTCTGCTTCCATGCTTCTGCTTCTCT<br/> TTGCTTCACTTTACTTTCTACTCGATCCATCTCTCTCTGATCTCAAGAACAATCTCAATCTCCCAACATATAAACACTACT<br/> ACACTCATTACTTCAAGCAGCTTCTCAGATTTCATCAGCTTT</p>                 |
| <i>CsDof5</i> | Csa02g067810.1 | <p>AAAACTTGAATAGTGACTTGATTAGTTTTGGTTTTATGTATAAATAATTTTAAAAAGTAATAAAATAATGATTATAATTTTTATTA<br/> AAAAATAAAAAAATACAATGATGTAGAAAAAAACATACGTTTTATTGCATATAGAAAAACATATTACTGCAAAATTAATCAATCATC<br/> ATCGAGAACTCCATAATGATGCAAAAATTCATCCCAATCCCTCCATATACTGCAATGGAGTATTGTTTTGCTCTAATTTCTCATCT<br/> GAATCAGAATCTTCTCAGCTATATTAAGTATGCGGTCTGAATCGAAGTCAACATCTCGTAGATTGATAACCTAATAAAATATG<br/> TAATGCCATTGTTGACGAATAACTTTTCGTTGAACATGTATGGCATACCTTGGTTTTCTTCTTAAAACTCGCCATTTTGTCTCCATC<br/> ACAAAAGTCCGTTGATGACAGATCGCAGTGAAGAATGCGTTTTATTGAACATTTCTTGTGACTACTGGTGGTCTAGCTTATTAT<br/> ATTGCTAGGATGGTACCTTTCCCTCGATATGGAGTAAAGGAATCCAGGTGCAAGAGCATAAACCAGAACTCCCAAAATAATTTGCC<br/> CATAGTGGAGTTGGAATTTGATGATTTCCCTCCATCGTAGCATTAGAACCCTAGCATCATGAGCAGACCCGGGAATACCAATATAC<br/> GCATATGTAACAACATGTCATATTGCATATTGCTAAGATATTCATACCTTTGTCGCGTTTTCTTCAATTTTCTCAATTTTCTGAAITTTT<br/> CCCGCAACAGTGACCGGAACATGTTCCATCTATTGCCAATAAAAACCTCTAAAGTAAAGCCAGTACCTTCTGTCAGATTGTAACCT<br/> TTGGATGAGGTTGATTGAGCTTCTGACCAGGCTAAGCAATCAACCGCCATGTTTCGAGGGCATTCAACACTTGTGAAATTTT<br/> TGCCCTATGGTTTCTGTAAGTACCAAAATATTTTCCAACTACCTCTGAGTTCGGTTTTGAGGCGCATATGTTGAGAAAATTTGCAAC<br/> GTTTTCTGGATGCTTACTTCATCGTTTTCCATCAAGTATGTTCTCTTAAGTTTTTTCATAGTTTGTGATACCCGGTGGATACA<br/> TCCGAATATGTCGTAGCATTGTTCTCATGACCATGAATAGTTCATATACGATCTCTCGGCCAGTCTGGATCTTCTCATCGGCT<br/> CTCTTCTATACTCATGGAGTAAAGTCCATGAATGATTCTCCAAAGTAAAGTCTTCCATCTCTGCTCATCTTCAAGCATCTGT<br/> AAAACTTCCCTTAAAAAAGAAAGAAATTAATGAATTTACTAAGGTGAAAATAGAAAGATATTATTAATTTCAAAAAACACAGAAAA<br/> ATAAACAATCATTATTTAAGCAAACTAAAAACATTCAAAAAAGTGAATAAAAAAGTTTTCTGTGATAAATATTATTCATTAGC<br/> CTATTCAGCTGTTCCGCTTATCCCGCTGCTCCGCTCGAGATATTGATCTAGCATCGTATTGGGTAGTGTGATGATAAACACGTCAT<br/> CGCTTGTGTTTTGAAGCACACTACCGCTCCCAATATAAAAAAGAGTCAATTTGAAAGTCCAGAGTCAATTTAGTACGCTTCAAT<br/> GCTCGTCCAACCTGTTATTTGGGCTTGTCTATAAATTTCTGTTCTGTTGTAAGGCTCATTTGTCATGATTTCGGTGTGATAT<br/> ATTTATTTGATGCTATGGCTTGAATGGCAGTTAATTTCAAGACATATCACAGAAATTTAAAAATAAAACTGCACCAAGTTG<br/> ATATGCTTAGACTCAGTACGAGAATAATTTCAAGAAATTAATACAATTTATATACCATATATATATATATATATATATATATA<br/> CGTAAACACTAGTCAACTATTTCAAAACATTTTTATATGAT</p>                           |
| <i>CsDof6</i> | Csa02g070560.1 | <p>TTCAAGTATAGCGTAGTAAATGATAAGCATTGGGGTGGTCTGGATAATCGTCTCTCATTCAACATTTACAGCTACATCATTGATCC<br/> AGACTTGCATATTTCTACTCTGTTACTTGGAGAAAGTTATATTTATTTCAATGCTTACAATCAGTGCATATGATTGATTGGTTTTG<br/> TTACTCACTCTTTTATAAACTTCAAGATCATATACATACTTGGAAAGTATATATGTTAAATTTAGGCTGATCTGAAATTTGACAGTATA<br/> AGTATATATGTTAATTTGAGAAAACAAGATAGAATTTCAATTTGTTGGCATCTAACAACAGAGACTGTTGACAGAAAAGAAATAAA<br/> AAAACAGAGTAAACAAGTAAATAACCAATGTTTACGAGCCCTGCTAAGAGAAAGTCAAAGCCCTTAAACTAAAGCTGCTTAGGAGTT<br/> AGGTCTTAAAGCCTTACAATATAACTTTTGGAGTGAACACTCAAAACAATCTTGTATCATTATTAATAACACATTTGTAATAAAGA<br/> TGATTACATGGAGTGATACAACCTGGTTGGACATAAACTAATTAATTTTCAACTTTTTATTTTTTTTAAATGCAAAATTTGGATGGGAAA<br/> TAATGGTTTATATCAAAACACATTAATGAATTTTAAAGAAATGTTATCTGATATTCGGTATTCCGATGAATTTCTAAAAATCACAAAC<br/> ACATTTGCTTTTGAAGGTACAACACTTATTTCTACTTTTTTTTTTTTTTTTATGTTAAGGAAGCTCTTAACTACGGGTCTGACTGCAT<br/> TGATGCAATCAGTTTGTGAAATCTATGATCTGACCAAGAGGTGACAGTGAAGTACCGAACCAAGTGAAGTTGACAGTGGGAAAA<br/> GGCAGAGTCTGGTATGATCCATGTAATCAATCTAAAGACTAAAGAGTTTGGTAAATCATACTATGTTGGCAGAGACCTTAAAGACC<br/> TTTTGGTTATATCTAATGAGAGACCTCATCTCTATTACCTTCTCAGTACAACCTACAACCGTTACATAATGTTCTATTATTTTT<br/> AATCTCTTTTTTTTTTTTTTAAATAGTTCTGACAACAAAATGAATCGAAAAGGTTTTAAATCTTGTGCAATTTGATTTCTGTTAAAC<br/> ACAAAGATTCATAGCTTCTATAATCTTATTAATCTCCGTAATCTACCTTCTAACAAGAAAGGTTCTTAAACAACAACAAT<br/> AGAAAATAAATAGACGGTATATTTGATATTTCTTCCAAACCAAAAAAGTGGATCGTTTTCAATTTGGGGAATTTTCACTCTCTAC<br/> CAACCAATTAAGAAAATGACAGTAAACAAGCAGCTCTGTTGAGTGCACCAAAAGGCTTCCCTCGATGACATTTACCTACCA<br/> AAAGTTTGAACAGTTTACATTAGTTTATTTGTTCAATTTAAACGAATAAATAGAGTATATCACTGTTTAAAGATGTTTATAAAACC<br/> AATCTTATACCATATAATAAAGCGTGTATATAGATCTGACTAGTTGACTCCATGCTCTAAATAGGAACACTTCTGTTTTCTGATGTTT<br/> CAAGTACTGTGAGTTTTTTGGTCAATGGAGGTTTGTGAAAGTCTTAAACAATAAATAAAGGTTATTTCTTCAAAAGATTTGAAATA<br/> TTTTAAACAAGTTTAAAGAAAATAACTAAAGATTTATGCTATATGGGTTCAATGGGTTTTTGTGAAAAGAAAAGTAAATATCA<br/> GAGGCCACATAAACTTGTGGTTGAGAAATGAAACGAAAATGCTGACATGGCATCCACTTCACTTTTTTAAACCTGATCAAAATCCCAAT<br/> CTCAGATTTCCAAACCAAAAAAATTTCAATCTAAACAACCCATACCTCACAAAAAATAAATAAAGTTTCAAGAGAAAACCTACGA<br/> GAAAGTAAAAAAGAAAGAAACAAATTCAGGAAAAGAAATA</p> |



| Name           | Gene ID        | Promoter sequence                                                                                                                                                                                                                                                                                                                                                                                                                                                                                                                                                                                                                                                                                                                                                                                                                                                                                                                                                                                                                                                                                                                                                                                                                                                                                                                                                                                                                                                                                                                                                                                                                                                                                                                                                                                                                                                                                                                                                                                                                                                                                                                                           |
|----------------|----------------|-------------------------------------------------------------------------------------------------------------------------------------------------------------------------------------------------------------------------------------------------------------------------------------------------------------------------------------------------------------------------------------------------------------------------------------------------------------------------------------------------------------------------------------------------------------------------------------------------------------------------------------------------------------------------------------------------------------------------------------------------------------------------------------------------------------------------------------------------------------------------------------------------------------------------------------------------------------------------------------------------------------------------------------------------------------------------------------------------------------------------------------------------------------------------------------------------------------------------------------------------------------------------------------------------------------------------------------------------------------------------------------------------------------------------------------------------------------------------------------------------------------------------------------------------------------------------------------------------------------------------------------------------------------------------------------------------------------------------------------------------------------------------------------------------------------------------------------------------------------------------------------------------------------------------------------------------------------------------------------------------------------------------------------------------------------------------------------------------------------------------------------------------------------|
| <i>CsDof10</i> | Csa03g011080.1 | <p>TATATCACAATTTGGTCTTGGCTATATGTTTAAAGATCGTTCGTAGAGCTGTTTTATTTTACTATTTTTAGGTAATTTGGTTAGAA<br/> AAATGTTCTCTTGGTATTATATTGATGGCGTATATAGTCTTAAATACGTAAAAAGTGTGATGATATCAACATTTAGGGTTA<br/> CGTGAACACAAATTCGAAGGAAAAGCCGGAATATCTCAAAAATGACAATTTATCCAATCTAAAGGGCGAAAAGGAGGAAGAAGAA<br/> CGATAAGAGTGTACATGATGGTTTTGGTATATAAAAAGGTATTCGTGATGGGTTTCATGCATGAACGTCTCTTTATTTTTTCGTTTTAT<br/> GAGATTTTTTTAGACTATTCGCGGTGGAGAGATTTGCCCACTGGAAGCAGTGTGTTATAATAATGTAGCAAGTAGGCTATCTTTGC<br/> CGGTCCCTTCCGAAAAGGAAAGTTAGCAATTTATAAACGAAACGAGTGTATCAATGAAGAGATAAGAAAAAAGAAAGACTAAAG<br/> TAGAGAAAATGTCGAGACAACTGCAAAATGGAGAGCTCTTTAAACAAGTAGTACGTTTTGTGACATAATTTTTGGACCAATAAATA<br/> AAAGTTGTAATTAATCGGAAACGAGCGACTCTTTCTCTTTAAAAATCAAACCTCATTATCTACTAGAAGAAGTAAAGACCCGGCGGT<br/> CATGTTGCTCTCTAGTACTCTGAGTTTTTCATAAAAATAGGAAAAAATATACTGAAATAATTACGAAACGACTCATGTTATTTATTTAGCT<br/> TTTACGCTTATTTATGCTACTGAATGCAAAATTTCTTTAATTTATACCATTGATATAAGACAAAGATCCACAAAAGTGAATAGGGTA<br/> TGATGATGAGATACTTTATTTATGGCATATGGGGCTTGCCATCTACATTATAAAGAATAATTGTAGAAAAATTTTATTTTTCGTATCTT<br/> AATTTGCCCAATATAAATACATCCATCTTTTTCATTAGGCACTAATTCGTTTTCTATTGGCTAATATCAAAAGATGTCTCTATAGAGAGG<br/> CACGTACGTGAGAAAAAGAGAAGATAGGGAAGAGAGAAGTTGAGTGTTCGGCGTTGGTGAGCTTCCATTATAATGAACAAAACGG<br/> CGCAGAAATGGGATTAAGATGATCAGAGTTAATATATGAGTTGATTTTTTAAGATTCCGAGTTTTGATGAAATCTATGACAGGCCA<br/> CGGATTACTGTTTGAATTTGGAAATTAGTATAGATTTTGAATTTGCAATGGTTTTATAAATTTAAAGAAAAATTAATCGACTACGAA<br/> AAAAATGAGAAAACCAACAATATTATTGAGGATAAATACGTAATGTTTCTAAAAGTTGTAAGGTTACCTCGAAAGATTTTTAAAT<br/> TTATATTAGAAAATTTAGTTAAAAAATGTTATATTAAAAATATATTTAACGTTTCTTCAGATTAAGAAAGTTATACAACCTCGTA<br/> TATTTCCGTCGACGTTTTCTCTATATATTTTCCATAGACGCTAGGAGAGAACCTTATAGGCGAAGGAAAACGCCCCACTCA<br/> AACCTAAAAATGGGAATCAGAAATAAAAAATAACACACAAATGAAGTATAGAGACGGGTATACATGAGGATATGAGAGTGGAAAT<br/> TATAGAAATATAGAAAAGCATAAAAAGAACCGAAATCAAACCTCTTTCTTTTTTTTTTCTCATTAAAAAATGCATTTTCTGGCTT<br/> TAATTCATTTGCTTTTGTCTCTCTCTCTCTCCTTTCTGATTTTGTGCTCTCTCTCTCTCTCTCTCTCTCTCTCTCTCTCTCTCTCT<br/> CTCTTTCTTTTGGCTTTGTTGTTCTTTTTTTTTTTGATTCCCCACCAATTTTTCTTGGAGTCTTCCCTTAAAGATCCATCAAA<br/> CTTTATAAAGAAGGTAGAAGAAAGAGATAATAAAGGGTAGAAGAACA</p> |
| <i>CsDof11</i> | Csa03g025140.1 | <p>TGATTAATGTCGCAATTCATTTATACGCTAAGAATGTAGAAAATTAAGTAAATCTAGATAGCGAATTAACATGAAAAATCAGTATT<br/> GATTGGTAGAATAAATTCACAACATGATATTTAATGATCTCATGTTGATTCCCAACCCAAAACTTTTATGCTAACAAAAACTAG<br/> TCTTTTTTTTTTTTTTTTTTTTTTTTTTTTTTTTTTTTTTTTTTTTTTTTTTTTTTTTTTTTTTTTTTTTTTTTTTTTTTTTTTTTT<br/> GTTGCATACTTCACACTTGTAAACAGTTATATATTTTTTTTGTATATCGAATTAATTTTTATAAATTAAGTCAAGCAACTTCGAGTC<br/> AAATAGGAATTAATAACACAGCTGCGAATTAATAAATGCCAATCCGAAAGAAAAAATTAACGTTGACTTCGATTTATCACAAT<br/> TTGTAGGTTATTTAATCAATTAGACTAGGATATCGTATCGTAAACACAAAAATAGTATTGGGATCGGAGCTTACCATAGATCTGATTT<br/> AAGGCTGCCCAATCAAAAACTAATCGGTGGTATCAACAATGATAAATTAACAGTCAAGTGTATAAATAATGATAAAGTCTAAAAA<br/> TAATAAATACATTAGAGAATCAACTTGTGGGACTAAGAAAGAGAGATTTCAACTCTGATGATTGAAGGAATTTAGAGAAAAAAGA<br/> GAACCATAGGTCGACACGAGGGTAGAAGCAGTGTCTCCCGTGGTGGCCCTTAATCTTGGCGTCAATCTTAATCTTACTAT<br/> ATTATCATGGTTACATAATCTATGCTTAAACGGTCACTAATCTACATTTGACTTGAATCCAACAATGAACATTTGGCTAGTAAATG<br/> AAAATCATACTAATGACGGATCATATTACTATTAACCCAAATATATAGACAAAACCTATCAACAAGTTTATATGAAAAATATA<br/> GTTGAACTGATCGGATATGATATATTTTATTTGCTATATTAGTTACGCAAGTTTATAGATTGAGGGTATTAACATTTAA<br/> GTATTAACATGGTCAAGGATAAAACAAAATGACAATAATAATAATGTAACGACGCTTAAAGGTTGTAATAATGATACCTTATTTAGA<br/> ATGAGTGAAAGTATCAATGTTACGATGCTTTGTTAATAAATCCAGTATGCTTTCGGGTTACAGGAAATAAGATGCTGAGAAATG<br/> AAGTGAATTAATCATCTACACACTAATAATAATGATGCCCTAAGTTAATTTTTAGAAAAGGAGGCTAATTAAGTAAATTTACTTACAT<br/> TCAAGGTTAGGTCAGCAGACCAAAAAAAGAAATTAACCTTTAAGTATTTTTTTTTTTTTTTTTTTTTTTTTTTTTTTTCTACAATGATATC<br/> TATCGCGCTTTCAGTGAATACCCATTTCAAAATCTAGATGAACATAGTGGATTAAAAAACAACCTTGAGCAACCTTGTATAAACAAT<br/> ATTTTTATGAGAGATTTACATGACTGTTAAGTGAAGAAAATGATGGCACAATGCACATCTTTACATTTTAAATTTGCTCTTG<br/> GATGGTATGAAACATAAATTAAGGTTGATCAACAAAACTTTCAGAAAATTCATCAACCGTTTTTAAAGGTTTAAAGTAAATGATATA<br/> ACATTTTATGTCATATATAAGTAAAAACTATTACGAAGGACCAAAATTCGGAGGTAACCTGATGAGAAAGAAACGGAAAAGGAGAC<br/> GCACGGCTCGCAACCGCCACGTTTACTTCGAAGTCTTACACATTAATCGATGCACCTCTGCTTCCACACACATGCTCTTCCCC<br/> AACTCTGCGTTACACAATGCCATATATTAAGAGTTAGATGTAATCGAATATACCACCAAGTCCCAATGTGACTGTTGATGATTTT<br/> CAATCTCTTACACACCAAAAGTTTCAAAAAGAGTACATGAAAA</p>                     |
| <i>CsDof12</i> | Csa03g028730.1 | <p>CATTTTATTTATCATAGTGTGACTAATCTAATATATTGTTGCATGGTACTATGGGGACCATGATGAATATTCATACGAATTTGGC<br/> TTGTTTTACTTCTCCGGATCTACGTGAATAATCAGTGAACAATACCAATAAACAATACCGTGAATCTTATCAAAAATATGCTTTTGT<br/> CAATGTCATTAAGGTCTGATGAATGTGCTTTGACGTGAATTCAGAACTTCATGATTATCACAACCGAAACTAAAAATATGTAACCA<br/> CAAACTCAACACCAAAATTTATTTAATTTAATTAATTAACAAATGAAAGGAAAATTAACAATATTTACTTCAATAAATTTGAAGTA<br/> ACTAAGAAGCCATGGAAAACACTGAGGACGGCCATCAGCTTAATACGACATGGACCTGCCTCGTAATATACCAATACATTC<br/> TTGGCAGACTCCAGATACACCTTTTGGATTGTCATCTATCTGCTTAAAAATATCAACGTAAGTTGCTGTTGGGGCCACTCGAAAC<br/> TGATGATACGTTGTTGTTTTACGAGATTGACACGAAACCTGAAATCAAAACTATCTTCCAGTTGAGTCTTATTAATCAATAATCA<br/> TCCCCTTTGTTTCTACAATGCAAAATCAACATGTCATGAGACCAATTTGTTAACAATAGTAAACATGTTTAGCTGAAAATGGTAAAAG<br/> TCCATCGGTGGACGAATGGTTTTCTAATGATGCCGAGTTTTGAGAACAAAAAGAAATAAGAATAGCAGCGAAATGAAAATTTGATTT<br/> GTTGAAGAGGCCATGGTTGGTTTTAGTTTAAAGAGATTGTGAGAAAGCTGGATTATAGATGAAACTCAATTTATTTGGCTAATG<br/> TTTTACGAAAAAATATCTTCAAGATAAATGTGAGAATCTTTAGTTTGAACGTATACAACATACGTAAAAAAAGAAAGATATTGACT<br/> GGTTTCTAAATATTATTTCTTTGGATATAAAGATGGTCAAATTCATGGAGTTCCCTATTTTCTCTATAAAGACTCGATTTTGGTTAT<br/> TTAATAAGCAATTTCTCCATAGGTATGATCTAATTTTCATAATGATCATAAAAATTTTATATTTATAGCAGCAGACTAATTTAAAGT<br/> TACTTATTTGTTATTAATATCATAGTGAATAGGGGAATCTGCTTATGTTTAAAGGTAATTAATTTATATATTACCTACTAAAACCATC<br/> AGATTAATAGGTTCAATTCATAATTCATGAACCATGTCATGGGAAAAAGTTTCAATGATTAGATTTGATGATTTGGTTGGTCTCT<br/> ATTCACACTTTTATTTAGAAATAACAATTTAATTCATTTATCATATATAAAGTCTATTAACCTTACAACTAATTTGATTTACTTCG<br/> GAAATCAAAAGTAAAAAGAACTCAAACCTGATTACTATTTGGTATTAACAACCAATTTAATCTCGCCATGAAATGACTCTAACATAT<br/> ACTATAAGTCTATAACGATGATGATACCACTTTTAAATACGATAGCAGCTGGCGTTTTTACAACAAATGTTTTCCGACTTTTGTGA<br/> TTGTTTAAACGAATATTCCAAGAAAAAACAACAAAAAAGAAAGAAAGATTGTAACACTAATGTAACCTAATGCAACAAATTTTGAAGCTG<br/> GCAAAAAGTAAAGGGAGCCAAATCTTTGAGTGGCACTGAAAGAGAGATCAAAAAGAGCAATGAAAAGAGATAGCAAAAAGCTCAC<br/> TTTTTAGCAACAGCATGTTGGCTATCTCTCTCATATGTCCTGCTCTGCTTACGTTAATTTCTCTCTTTTGTGCTTTGGCTCTG<br/> TGCGTTCCATTATTAATTAACCAACCTCAGCCTCTCTTATACATAGTCTTGTATCTGACTCAAATAAGGAATAAACACACATAA<br/> CATCAAACTAATCTCTCTGCTTCACTTTCTTTTTCTGCTTT</p>        |



| Name           | Gene ID        | Promoter sequence                                                                                                                                                                                                                                                                                                                                                                                                                                                                                                                                                                                                                                                                                                                                                                                                                                                                                                                                                                                                                                                                                                                                                                                                                                                                                                                                                                                                                                                                                                                                                                                                                                                                                                                                                                                                                                                                                                                                                                                                                                                                                                                                                         |
|----------------|----------------|---------------------------------------------------------------------------------------------------------------------------------------------------------------------------------------------------------------------------------------------------------------------------------------------------------------------------------------------------------------------------------------------------------------------------------------------------------------------------------------------------------------------------------------------------------------------------------------------------------------------------------------------------------------------------------------------------------------------------------------------------------------------------------------------------------------------------------------------------------------------------------------------------------------------------------------------------------------------------------------------------------------------------------------------------------------------------------------------------------------------------------------------------------------------------------------------------------------------------------------------------------------------------------------------------------------------------------------------------------------------------------------------------------------------------------------------------------------------------------------------------------------------------------------------------------------------------------------------------------------------------------------------------------------------------------------------------------------------------------------------------------------------------------------------------------------------------------------------------------------------------------------------------------------------------------------------------------------------------------------------------------------------------------------------------------------------------------------------------------------------------------------------------------------------------|
| <i>CsDof16</i> | Csa04g026300.1 | <p>TTACAAAACGTAACCTAGTACATGCAAGAAATTTTAAAATAATGGACGCAAAAGTCATGAACCACATGTGCTCGACACACATAGATATT<br/> TGTTGGACCTCGGCTCCTGATCAGTCTCACAGAGAAAATGTGGTCCAGGAAATGATTAATCATGCACCAACTATAGTTATGTAGTATT<br/> ATTCTACCTTTCAAGTTTCACCAACATTTTGGAGAGTAAAATATTAACCTAACTGTGACTAACTAAAAAGAAAAAGAAAAAT<br/> TAAAAAGGAGAGAAAATAGAGAAATTTCTACTTTGTCACACTTAGGACCAGCTTGAGGGAGTGGTGGGATTACGCGGAGAGTAT<br/> AAATTTTGGACTAAGTGAAGATGAAGGTGGGTCCGCGTGGTGACAACCTCAAGAAGAATTGTGACACAAAAGAAGAGATCAAGA<br/> CACATGAAGATGGGTGCCTCAGAAATGGACCTCGTACAACAACCAATTTCTGATACATCATAGTACGGTCTCGATCACACTTCTCAT<br/> CATTCTCAGAAAACAAATCTGACGCCAAAGATATATGTGTATATATATATATAAACCACATATAATATTAGTAATTGCATATTGTT<br/> ATTGGCTCATTGTGTTAAGAAATCCACAAATTTATTATTCTTAGAAACCCTATATAAGGATCACAATAGTTTATTGTTTGTATTTAG<br/> AAAGTTTCGAACAAAATCCAAAATAGATGCAACACATATCTTATGACTATTTCTCATGTACATCAGAGATTCACGACCACTTCGA<br/> ATTCCAATATGATGAAACGTAACATTTTGGATCCGAGAGTACTAATCTCGTTTGGTAGTTTCAACAAATATTCCCAACATCATCA<br/> CATGTAATGACTCAATATATAAAATTTGTACATGATAGAACAATCTATATCAACATGTTTTTGTAAATTTACGGAACACATAGTTATA<br/> TTGTAAGTGAAGGATGTGGCTCCATCACAATTTAAAAAAAATCAACGTGTGATGATAATGAAAAATCTCTTCGCTCACAAGATCT<br/> CGATATCGCAATTATATACATATATAGAGATTTTATTATTAATATGATACCATTGAAGAGCCGATGAACAAGCATAATTTAATTAGA<br/> GACAACCTAGTCTTAATATCAATGTTCCGGTCGGACCGGTCCAACCGCGACTGGTAGACATTCCGGTCTGGGTTACCTCTAAAACTGGA<br/> CACTAAAAATTCACAAAAACGAAAACTCCACTAAAAACCCGTGAACCGGTGGTGAACCGGCGAATCGGACCAACGAGATTCGA<br/> TCAAAATAAAATTTTATTTTATCACATTTCAAACCTCAACAAAATTTAAATTTAAATGTTGTTATTTATAGAAAAATCACTTAGTTAT<br/> TTTATCTAATCAATTTAAAAATGTAATTTTAGTCTTTAGTACTTCAATATGATCTTTTGTTCATAGATTTATAGAAAAATAGATGTTAT<br/> TTTTAGAAAAATATAACAACCAAGTAACTAATTTACCCTGTTTCAATTTGGTCTGACCGATTAATAATATTGAGGTAAAGCACAATTTGCT<br/> GTTCACTTTCAAGTCCGATTTAAAAAAAATGCTTAATATACTTTATATTTCAATCTAAATGAAAAATTTAAAAACAGGGTCTAGCTGT<br/> AAATCAGAAGTAGGCATGATAAATCTTTATTTTAAAAACCGGTTTCATGGTTCACATCTCATGCTAAGAGTTGGATCAGCTTATCC<br/> TCATACGGTAATAAACATTTATTAGTAACGTTAAACATTTGAAACCAATATAATAATATTGAGGTAAAGCACAATTTGCTCAGTACTT<br/> CCACATTTTCTATATATAGAGAGATAAGATGCTTGGCTTTCTTATCTCCACTCTCTTTCTCTTTATCTCTCTTCGCTTTAT<br/> CTCAGTCTCAATCTTCTACATTTTCAAGAAGCTTCTCAATTAGTTGAGAT</p> |
| <i>CsDof17</i> | Csa04g030380.1 | <p>ATTTAAATTTTTACAGGGTTTCAACAGATTTCTGTGTGACCAATGAAAACAAAAACACTTGTATTTTATAAACACATCCATTTTATA<br/> GTTTTTTTTTTTTTCTCTTTCCCTAATAAAGTGAACAAAAAAGGGTGTGATGTCAGAGGAACACGTGAAGGGTGTGGTTA<br/> GATCTTGAGACTTGAGCAAGAGAAAAGACATGCATCGATCTTTTGGGTTGATGAAAATCCATGAGCAGGTGTGACAGAATCCA<br/> ACGTGGCAAAGCAGACTTTGATTTAGATCCTCCATAGTCCAAATACCTCAACTTGGTTAAATTTGTACAATGTGGCAGTGAGACAT<br/> ACCTACATAACCTTTTTGTTAACAACCAATTTCTATCAGACAGTCACTAAATCTTACCTTTCTTTGCTTTTGCCTTATCCAACCAAC<br/> GTACCAATCATTCTTCAATCTCTTATTGAGGATTTTGGTTCCTTCCACTTGGAACTGGAATTTGTTTAAATGGATTTGAAAGTAAATA<br/> ATTTTCTATAAACTGAATTTAGATATATAGAAATATTTATTTTAAAAAGTAAAGTATTCGATAGATGTGACTCTAAGAGATGTAAT<br/> TTTAGAGAGGGTTATTAATTTTATGAAATTAATAGATTTGGAAATCCAATAAAAAATCATATAATTTGGTATTATGATTTAAATATAC<br/> TTGTTAAAACTAGATTTTCAATTTAATTTATTTGTTTTGGATTTCCTTCCAAATCCACATTTGTTTAAATGGATTTGAAAGTAAATA<br/> AAAGAATTCAAATTTAAGGATAAAAACATGTTATTTCAAAATCCATGTGTTTTGATTTTATAATTTACAATTTATATGGGTTTAGAAA<br/> TCATTTCTCCAATAACAACCTACTATTAGTACCATCACAATTAGGTTTGTGATAGTATGTTATTTTAAATTTATTACTGATCTTTGT<br/> ATGATTTATTAATAAGTGAATAAATTAACCTAATTTGAAATCTGATCTTTGATGATGTTGATGTTGTTGTTGTTGTTGTTGTTGTTGTT<br/> TTCTTATATCAACTGCATTTCTGGTTTAAAAAGAACAAAAATATCAACAATCACAAATATAAAGTCAACAATTAAGGATGAGATTTACATG<br/> GGACCTGATGAAGGGGAGAGATAAGTAATGCACTAAAATACAATACCAATTTCCAAATCTATGTTTTGAAATTTTGTATGTTAAAC<br/> ATTTGTACAAAAGATGATGATTGTGAAGCTTCAAATAAAATTTAACATACTTTTGAACCTGTTTTGCCATGTTGAAATGCTTT<br/> TATTTTATTTTCTATTAGATATAATGTCTCCCTAAAAAGTTTTCTCCATTGTTGAAAAATCTTGCATCTAAAATATATGATGATCATGT<br/> GTAATCAATGAAGTAGAAGATTCAGTTGTTATCTATTAGAAAGCTTGTATTCAAAATATTCTTTTGTGCTTATGTTTAAAAAACCAT<br/> ATTTATGATTTGTGTTATGGGTTTTCAAAAAAATTAATTTATATAAAGATTACTTAATAAAAAAAAGTTTATCTTGTATTT<br/> GTAATCCCATTATATCAGAAAACACTTTGGATAAAAAAACAACCTACTATTATTGATACGAATAAAGTTAGAAATTTACTTGGGACTT<br/> ATTATTATTATAATACAATAAATATATTTAGAAAAAGAACCCGACAACCCGATCCGGTAGTAATGAGGGAAAAAGGAAAAATATC<br/> AGAGGCCACATAAACTTGGCTGAGAATACAAATGTGATGCTGACGTGTTACCCTCTTCTTTTGTACGGATTCTCCCTTAATCC<br/> CTAATTTTCATATCTATTCACTCTCCCAAACTAAATCTTCCCAACAACAACAAAAAAGATTGACTAGTGACTACACGAAGCT<br/> TTCTCGCCTTTGCTTTTTGGTTGAGAAAAA</p>                              |
| <i>CsDof18</i> | Csa04g036060.1 | <p>ATCTACTACTAGATCATACACTCATTGTGCATACCCTCAAGTGTTCAAATTGTCATGCTCATCTTATATGTTTCCATATGTAACA<br/> AAATGTAACAAAACGAGATCATTAGTTTAAACGGATGAGTATCTTATGAACAACCTTTTTTTATTTGATTTTTACTACTATTTTAGA<br/> AAAGGTTATATGTTTTCGTCCTATGATGTTTACTTTAAAATCTTAGTATAATAAATATATATGCTTAGATTTAGTGTGTTTATT<br/> GTGGCTTGGAGATCAAACTCCACTACAATTTGGTGTGTATATTGACTAAGATAGATTCTGATTCGGTTGTCATATCAAAATCA<br/> ACGTAATAATTTCTAACGGAATGATGTTATATAGTTGATCAATGATCATTATAGTAATACAATTTGGTGTGTTTATGATGGAA<br/> ACACGAGCATAGTCCCAACCGCCCGCCACTACCCTTTTAAATTTAAAAATAACGATTTTTTTTATAAACGACTGTCACCTGTCTA<br/> ATATAGTTTGGATTCAAATTTGTAAGATATTGAAAAGATTTGAAAAGAGAACAATCTATAAATAGAGTAATAAACAACAAAAGGTTTCTG<br/> TACATATAGTATTGCTTTTCTAAGACAGCGAACAATGAAACAAGATCATTTTTTTGGACTTTAATTTCAAAAGCCTGCGTGATTG<br/> ATCCAACAATATAAAAACAATACTTTAATTTTCGTTCTCAAAATAAGTAATACAATAAATCCAATTTTCAAAATTTTTTTT<br/> TTGTAACGAAGACGATAGAAAACGTGTCCTTTGTTCCAACTTCTGGAACATTCATTTTATCTTTTTTAAATGTCAGATGATTTACG<br/> CTTACGACACAAAATATTGATTTTTTATGAGTTACACAAAATCATTCAATTTGAATAAAAATATACTACTATAAGTTACGGATACTA<br/> AAATATTGTTTTTTAGCAAAACAAAATATTGGTTAAAAGCGAAATCAGTAGTAAATAGTTATATAAATATATTGAAATATATATG<br/> ATGAAAAATTTGAAGAAAAATGGAAAGAATCTCAAAAGATAAATGTAAGTAACTTTGGAATGACCGGTACGCATGATAACCCCAAT<br/> AGTCTTTTTAACCTGTGTGCTACTGCGACCTACTCTATCATTGTTTTTTTTTTTTGGTTTTTATAAATCAACTGTCTTCTGTTATAAC<br/> AGAAGAAGATAAAAATTTACTTATGTCATTTATTTAGTTTGGACTGTTGTCATTACTAGTAGTAATTTAACTTTAAACATATATAAA<br/> AGCAACGATGACCAAACTTTCAACATTTATGTCACATAAGTACAATAATATCTTTTTCTGTTTTTCAAAAACCTGATTTATA<br/> AGGTTGGTAAAGACAAAATAAAATATACATCATGATGTTTTTTTTTCAGATGATTTAGGCAGGTACCCAAAATATATCAACAAAACC<br/> ACAACGGTGAATCATTACCTCGTTGAAGTTTTTTTTTTGGTCTGTTTTCTCATTTCATATGATCAAAATATGAGATGATGTTGCCAC<br/> ACTATACACTATAGTCAAAATTTGCGACGATCATAAGAAAATATTTTTACCTTATGTTCCACCAGGACTTAAGTAATGATGTT<br/> TAAAGATGTTGATTTTAAATGTTTTTATCATTGTTCAACCTGAAAACCTTGAACAGAGCCGCTACGATGAAGAGAGCCGA<br/> CTTAAGTAGTGTATTACAGGGGTGAAAAAACAACAGGCTAACACTGTTTACAATAATAATCATAGCCGACTCAACCAATTCCT<br/> AAAAAAAATCTTCATAAAAAGACAAAATCAAAAGACAAGAGCGTGGCTCTAATTAACCAACCCCTCTGTCAAAAATAAAAA<br/> TAAAGCTGAACTTCTCTCCATCCCAATTTCTATCTGCG</p>                                                |











| Name           | Gene ID        | Promoter sequence                                                                                                                                                                                                                                                                                                                                                                                                                                                                                                                                                                                                                                                                                                                                                                                                                                                                                                                                                                                                                                                                                                                                                                                                                                                                                                                                                                                                                                                                                                                                                                                                                                                                                                                                                                                                                                                                                                                                                                                                                                                                                                                                                              |
|----------------|----------------|--------------------------------------------------------------------------------------------------------------------------------------------------------------------------------------------------------------------------------------------------------------------------------------------------------------------------------------------------------------------------------------------------------------------------------------------------------------------------------------------------------------------------------------------------------------------------------------------------------------------------------------------------------------------------------------------------------------------------------------------------------------------------------------------------------------------------------------------------------------------------------------------------------------------------------------------------------------------------------------------------------------------------------------------------------------------------------------------------------------------------------------------------------------------------------------------------------------------------------------------------------------------------------------------------------------------------------------------------------------------------------------------------------------------------------------------------------------------------------------------------------------------------------------------------------------------------------------------------------------------------------------------------------------------------------------------------------------------------------------------------------------------------------------------------------------------------------------------------------------------------------------------------------------------------------------------------------------------------------------------------------------------------------------------------------------------------------------------------------------------------------------------------------------------------------|
| <i>CsDof31</i> | Csa06g024450.1 | <p>TTTACTTTAAAATCTAGTATAATAAATATATATTGCTTAGGTTTAGTGTGTTTATTGTGGTCTTGAGAGATCAAATCCACTACAA<br/> ATTTGGTTGTTGATATTGACTAAGATAGATTCTGATTTCCGGTTGTCATAATCAAATCAACGTAATAAATTTCTAACCGGAATGTAGTTA<br/> TATAGTTAGATCAATGATCATTTCATAGTAATACAAATTTAGTGTAGAAAACACGAGCATAGTCCACACCGCCACCGCCACTACCGTT<br/> TTAAAATTTAAAACACAAAATTTGATAAGCGACTGTGTCACCTGTCTATATACAGTTTGAATTTAAAATTTGTAAAGTATTCCGAAAGGG<br/> AACAAATCGATAAATAGAGTAATAAACAAAACAAAAGGTTTCTGGTACATAACAATATAGTATTGTCTTTTTCTAAGCAGCGAAACAAATG<br/> AAACAAGATCAATTTTTTTGGACTTTAATTTCAAAGCCTGGCGTATTGATCCAAACAATATAAAAACAGTACTTTAATTTTCGTTCT<br/> CAATAAAGTAATACAAATAATCCAATTAACCATTTTTCAAATATTTTTTGAACGAAAGCAGATAGAAAACGTGTCCCTTTGTTCCA<br/> ACTTTCTGGAACATTCATTTTTATCTTTTTAATTGCCGATGATTACGCTTACGACACAAAAATATTGATTTTTTTTTATGAGTTACACA<br/> AAATCATTATTGAAATAAAAACTATACTATAAGTTAGGAGATTTACGAATACTAAAATACTGTTTTTTCTTTAGCAAAAACAAAATAT<br/> TAGTCAAAAAGCGAAATCAATAGTAATTAGTTATATAATATATAAATTTATGTATATAAAAATATAAGCATGAAAATTTAAAATAAAA<br/> ATCGAAAGATTCTCAAAGATAAATGTAGAATTACTTGGAAATGACCGTACACATTGATAACCTCAATAGTCTTTTACCTGTGTTGCGT<br/> ACTGCGACCTACTCTATCATTTTGTTTTTTTTGGTTTTTATAATCAACGTGCTTCGTTATTACACAGAAAGATAAAAATTAATTAAT<br/> GTCATTATTATTAGTTTGGAGTGTGTTGACTGTGTTCTACTAGTAGTAATTAACCTTTAAACATATATAAAAAGCAAAACGTCATGA<br/> CCAAACTTTCAACATTATTAGTACATAAGTACAATAATATCTTTTTCTCTTTGTCAAAAAACTGATTTATAAGGTTGGTAAAGACA<br/> AGACTAAAATATATCATGATGTTTTTTTCAGATGATTTAGGCGAGTACCAAAAATATATAACAAACCAACCGTGAATCATT<br/> ACCTCGTTGAAGTTTTTTTTTTGGTGGTCTCTATTTCATATGCAATCAATATGTAGATAGTGTGCCACACTACACACTATAGTCAA<br/> ATATTGCGACGATCATAAGAAAATATGTTACCTTCATGTTCCACCAGGCCTTAAGTAATTAATGTATTAAATGTGATTACTTTCT<br/> ATGTTTTTTTATTCAATGTTCAAAAACGAAAACCTTTGAAAACAGAGCCGCTACGATGAAAGAGAGCCGACTTCGATGTTCAATCAT<br/> AGGGATGAAAAAACAGAGCGTATCACTGTTTCAATAAACCCATAGCCGACTCAACCAATTCCTAACAAAAAATCTTTATAAAAAAGA<br/> CAAAATTAAGACAAGAGCGTGGCCTCTAAAATTAACCAAAACCCCTCTGTCAAAAAAATAAAAAAGCCTGAAACTTTCTTCTC<br/> CTCCCATTTCTATCTGCGCATCTCTCTCTCTCTCTCTCTCTCTCTCTCTCTCTCTCTCTCTCTCTCTCTCTCTCTCTCTCTCTCTCT<br/> CTCGTACCCTAAGTTTCAACCTTACCTCTCTATAACAAACCCAAACAATAAAGCTTCAACCTTTAACCTTCGATTCCCGCTCTTCAA<br/> CTCGCATAAAAAAAACAAAAAGCTTCCATTTTTTCTCCGGTT</p> |
| <i>CsDof32</i> | Csa06g026770.1 | <p>CTCAGATGTTTCTCAATCTAGAAGCTTCTTGGTGGGAATATACCCAACAATAGCTATGAAGCTGGAGTTGCGTTAGCCGTTGAAGCT<br/> CTAGGATCTCTAATGATGAACAAGAGGTTATAGTCAAGGAGTTATAGAAAAGAGCTACAAGAATTTGGTCGAGCTCCGATTCTGA<br/> GGTCGCTGAGTTAGCTAATGAGCTTGTAGTGTCTTGGCAGCAAGACTCGAGATTCAATGGTACAAGAGCCGGTGGCAGCATCAGA<br/> GGAGCAGCTTGGTACTACGATTTCTTAAACGTTATTCGTTGAAAAGAGACTTTAAGGTGAACATGAGTCGCAAAAAGACTAGCTATG<br/> TTTTGGGACAGAGTGTGAAATGGTGGAGACGAACGAGTTACCTTTGATTTTCATCTAGGGAAGAAGTGGATTTACGACTCTCAAT<br/> TTTTCAACTCTTAGCTGAGCCACTCGACATCGCAAATTTTACAAAAACAGAGATGTAAAGGAGCGGTGGACATTGGATGAAGG<br/> GAATAGACCCAAAAGGTATGTGGTATTGATAAATGGTGGAAAAGAGCTGGAGAGCCTGAGAAGTGTGTGAGAAGCAGATACACTAG<br/> CACTACGCAAGATCTGCTTTGGGCTAAGCTTGGAGGAAGCAAAAGAGTGGTTGGATGAGGTGAGAGAGAGAGAGTGAAGGCTCA<br/> GAGCAATATTTGCTACGGGAAAAGATTGTCCATTTGAGAATTTAGCCGACAACTGAAGAGAAAATAAAGGAGTAAAGGATGTT<br/> TTGGCGAAGAAGCTCGAGTTACATTATGTGGTGGAAAATCTAAGAGAGTTCAGGTCGAAAATGGGTTATGGAATGGAATTGAGATG<br/> GTTGTTGATGAAGGTGACGCAATGGAGACTTGTAGGATTAAGTAGCGTATCAAATGTTGATATGCTATAATAACAAACTCTGTTAGT<br/> ACTGCTGTTCTCATTCAATGTAAGACTTTAATTTCTGATTTATGTTATGTTTATCATTAAAGTCTCAACAAGTTTCTGCAAGGTTTCTA<br/> TTAATGTAAGTTTATTACTTAATAAAAACCAACATGTTATATAAGGTAAGCTAAATTTTTATGATTTTTTTTTATATAGATAGAAAAAC<br/> GTAAGACCTACATAGGAATCTTGGAGATTGCCATTTGTCACATGATCCAAGAAGCTCTTTCCCACTCAGATTTCCCTTCCAATCCC<br/> CCTCTTTTGGGTAATTAAGAACTAATAACAAGTCAAAATATACTAATAGAGACGCCCTGTTCTTAAACTTTGCTTTTCTTCTG<br/> TTTACATCTCGTTTCTTAGTTCTTTATATTCACAGATCAATTACGCATACCTTACATACACACAGCAGATATATGATCTGTCTACTTA<br/> CAAGTTCTGATCCTAACCGGCTTGGACTAAATCTTTTCATCGTGTGAATTTCAAATATGTTTCATATATAGTACTCGTTATAAATTAATC<br/> CTACCATTATTGATATAAACTTTGCTTTAATAAGTGAATTTAATTAACATCTATTAGTAGACTTATAATATAGAAGTCGCAAAAAG<br/> AGAAGACATATAGTAATCTGACGCTCCATTAACCTAAGCCGTACAAAATAGCTCAATGACTCCAAAATCTCCAAAAGG<br/> GGCATAGGCTCTTAGTTCCGCTTCAAAACAACTCCCAAGACGATCTATAATTAACCAATTTCTTATTATCATATCTTTTTCAAAA<br/> CATATACTGGTATTAACTATATCAAGATTCAAAACCTTAACCTGTCTCCCCAAGAAGCAACAGTGAAGCGCACCCCTTACGAG<br/> GCATTTGCTCCCCACACTTCCACTCTAGCCCTCCAGTGTTCACCCCTCTCCACATGCAAAAACACTACACACACACATTCATGC<br/> ATGCGTATATAACATTTCTCTTGTGAGAGAGGGAGAGTGAAGAGAGAT</p>                             |
| <i>CsDof33</i> | Csa06g029980.1 | <p>TTTGATTGACTATTAATAACAACAATCTATATTATTATTCATGAATTAATTTTATGTATGTCATGTGTATAAGTGAATTTGCTATTGT<br/> ATTTGTAATTTATTGTTAATATGTTTTCTAAGTATTACAAATCAATTCCAATACCATAAAAATTTGAAATTTCCGAAATTTGTTAAA<br/> ATTTGCTCAATTCATAATTTAAAAAGTTAAACTATTAATAAATATATCTATAAATTAATAATTTAATTTTCAAAATTAATTTCACTATA<br/> AATCAATAAATGATTGGTCCCAACATTTAATTTATAGAGGTTTATTTGTAATTCGAAATATAATTTTCAATCAATCAATGTTATC<br/> GTTAAGTAATCACGAGGTGGTGGGCTAGTGGTTTTAGTCTGGTGAAGAGTGGCCCTGTTGGTCTAGGTCAGAGATCGATTCTTTCC<br/> AAGCGCAGAATTTGCTCAGATTTATCCCTTTAACTACATGAATATAGATTCAATGCTTACAGTCCATTGTCATCCCGAAAAAATCTAT<br/> AGGATACCAGAATCAGGAAAAAAGAAAAGAAAATAAACAACCTGTGTAAGAATCATCATGATTGATTTATTGGCTTAATATAAAATTC<br/> TAGTTTTTATTCTTGTGTTGTAATATCCAATCACTAAATCAGTACATTATAATTTCTTCTTTGATATCGAAGTTCAGAAAAAAA<br/> CTGAACGATTTAATAATGGATCAGAAAATCTAATAGTATTATCAATTTTGAAGGAAACCATATACATATATAAGAAATCATAAGAGTT<br/> CTTGGATCAATTTAAGACTGACCACTCGAATCTATAAAATCTCGCCATGCAAAAGGTAATCTATTTTTATAAGCAAAAACAAAT<br/> GACGAAAAATTAAGAAAGATAACTAAAATAACTATGAAAAACGAAACTTGGGTACACCCGAGGAAAAACAAGGTACACTCGA<br/> TTGTGAACTCCACCAAGACCACCCACTACCAATTCACCTTTATTGTTCTTTATTAATTTCCAAATCTTTTTGTTTTTTTATATAT<br/> TAATCTAGCTAATTTTCGCTCTCTCGTTGTTTTTTGACCTTTAATTAATAAATAAAGGAGGAGGCTAGGTTTCTCTCTGCA<br/> TGCCAGTACTCTGCGCTTCAATTTCTTTTTGGGCACCAGTCTGTGTAACGATGCAAAAGAAAGAAAAAAGCTTACATGCTAA<br/> GAAAACATATTTCTTGTGCTTTCTCTCATAAAAGAAATTTATTTGAAATTTATCGGTGCTAATGAAATACAATATATGTAAGAAAGTGG<br/> AATCGGATCGGACAAGGAGTGAATTAATCTACCAACTTAGATTTCAATCGTCTTTTTCTCATTTGACAAGTAACATACACAATATA<br/> CTAACACAGATATGATATCTTATAAAAAATGATATATAAATTAATCAAAAATACACACATATGATATCATAGTTTCAATCAACC<br/> AAATGTTGATGAAATTTGATCAATTTTCATACGGAGCTACAGCTATGTCGAGATTAATATTAGTATAACATATATGAAACAAATTC<br/> AATCTGATATAAACAAGTATACAACCAAGACACACAATGACGTCGTAGATGATTGACAAAGTAAAGCAAAACAACT<br/> TCTTTAAATCGACACTTAATCCAAAAGGTTAACAATAAATAAAGAGGTTTTTTCATGAAAACAAAAAGAAATAAAAGAGACTAAGA<br/> GAATGATGAAAATTTGAAGAGAAAAGGAAAATAAAATAAAAAGAGTAAAGAGAATTAAGAAACCAATAAATTAACAAAGGAAA<br/> CTTCATTTCACTCTTTTTATCTCATTACGCTCTCTCTCTCTCTCTCTCTCTCTCTCTCTCTCTCTCTCTCTCTCTCTCTCTCTCTCTCT<br/> ATATCTGCGACCTTACCTAAAAAAAAGAAACATTTAAAG</p>                                         |









| Name           | Gene ID        | Promoter sequence                                                                                                                                                                                                                                                                                                                                                                                                                                                                                                                                                                                                                                                                                                                                                                                                                                                                                                                                                                                                                                                                                                                                                                                                                                                                                                                                                                                                                                                                                                                                                                                                                                                                                                                                                                                                                                                                                                                                                                                                                                                                                                                                                                                                                                        |
|----------------|----------------|----------------------------------------------------------------------------------------------------------------------------------------------------------------------------------------------------------------------------------------------------------------------------------------------------------------------------------------------------------------------------------------------------------------------------------------------------------------------------------------------------------------------------------------------------------------------------------------------------------------------------------------------------------------------------------------------------------------------------------------------------------------------------------------------------------------------------------------------------------------------------------------------------------------------------------------------------------------------------------------------------------------------------------------------------------------------------------------------------------------------------------------------------------------------------------------------------------------------------------------------------------------------------------------------------------------------------------------------------------------------------------------------------------------------------------------------------------------------------------------------------------------------------------------------------------------------------------------------------------------------------------------------------------------------------------------------------------------------------------------------------------------------------------------------------------------------------------------------------------------------------------------------------------------------------------------------------------------------------------------------------------------------------------------------------------------------------------------------------------------------------------------------------------------------------------------------------------------------------------------------------------|
| <i>CsDof46</i> | Csa09g053360.1 | <p>TTTTTATTTGGACGTTAATACCTCGTCTTTTTGGTTGGAAGAAAAATACATCATTTAATTAACCGTGCAGTTAATACCTAAACTA<br/> ATAAATTTTGTAGTTTCATACCTACGATTTGTTGACAAAAATAAAATCCGTTTTACCCCTACTATATCAATTAATAATTAATTTTAA<br/> ATGATATGACATTACCTTATAAGTTTATCTGAATTAATAATTTTATTTTGGATTACAATTTTGGTTTAAATATTTAAATAAAAATCTCGT<br/> TTTTACCCTTACTATATCAATTAATAATTAATTTTAAATGATATGACATTAATTTATAAGTTTATTTGAAATTAGAATTAATTTATTTTA<br/> AAAAATTTATTTTAAATTTAAATAAACTTCCATTTTTACCCTTACTATATCAATTAATAATTAATTTTAAATGATATGACATTAATTT<br/> ATAAGTTTATTTGAAATTAATAATTTTAAATTAATTTATAAGTGTATTGAAATTAATAATTTTATTTATTTATGTTAAATGATA<br/> TGACCAAGTCTGTGAAGCGGAGAGAGGAGAATAAACATGAATTAGAGTTGATGAAGATAATTTGATTTTTTTGTAACAAAAATTTGT<br/> AATTAATAATAATAATTAATAAACTTATAAAATTAATGTCATATTTTAAATTAATTTATTTGATATAGTAAGGGTAAAAA<br/> CGGAATTTATTTTTGTCAAAAAAAGCTAGGTATGAAACTGACAAAAATTTATTTAGTTAGGTATTAATAACACATCTTTAATTAATGATA<br/> TGCATTTTCTTCAACAGAAAAACGAGATTAACCGTCCAAATAAAAAATAGATGAGGTATTTTAAGCTTTTTCCCTTAGCTA<br/> GTGGAGTATTTATATAAATTTATATATAAAGCATGAAAAATGAAAGAAATCTCAAAAGATAAATGTAGAATTTACTTGGAAATGACC<br/> GTACACATTGATAACCTCAATAGTCGTTAACCTGTGTGCGCTACTGACCTACTCTATCAATTTTGTTTTTTTTGGCTTTTTATAATCA<br/> ACGTGCTCTCGTTATTACACAGAAAGATAAAATTAATTAATGACAACCTAGTAGTAATTTAACTTTAAACATATATAAAAGCAA<br/> ACGTGATGACCAAACTTTCAACATTTAGTCACATAAGTACAATAATTTATCTTTTCTCTTTGTCAAAAAAAGCTGATTTATAAGGTTG<br/> GTAAAGACAAGACTAAAATATACATCATGATGTTTTTTTGGATTTTTCAGATGATTTAGGCAAGTACCAAAATTAATTAATGATA<br/> CGATCAACAAAACCAACCGTAAATTTACCTCGTTGAAGTTTTCTTTTGGGTCGTTTTCTCATTTTCCATATGACATCAAAATATGT<br/> GTGAGATATTGTGTCACCCACCCACTATTAACATAAACAATAGATAGTCAAAATTTGCGCAGCATATAAGAAAAATGTTTTCTTCAT<br/> GTACCACCTATTAGTAGTGTATGTTATAGATGTGATTTTATTTGTAATGTTTTAACTTCAATTTTCTTCCATGCAAGCTGAAAGCTTCTC<br/> GATCAACAAAACCAACCGTAAATTTACCTCGTTGAAGTTTTCTTTTGGGTCGTTTTCTCATTTTCCATATGACATCAAAATATGT<br/> GTGAGATATTGTGTCACCCACCCACTATTAACATAAACAATAGATAGTCAAAATTTGCGCAGCATATAAGAAAAATGTTTTCTTCAT<br/> GTACCACCTATTAGTAGTGTATGTTATAGATGTGATTTTATTTGTAATGTTTTAACTTCAATTTTCTTCCATGCAAGCTGAAAGCTTCTC<br/> GATCAACAAAACCAACCGTAAATTTACCTCGTTGAAGTTTTCTTTTGGGTCGTTTTCTCATTTTCCATATGACATCAAAATATGT<br/> TCTCTCATCTCCATAAAAAACCAAAAGTTCCCAAAAAAATCCCACTCTCTCGTACCCTAAAGTTTCAACCTTTACCTCTCTATA<br/> ACAAACCAAAAAAAGCTTCCATTTTTTCTCCGGTT</p> |
| <i>CsDof47</i> | Csa09g059550.1 | <p>TGTTTCTAAATCTAGAACTTTCTGGTGGGAATATATCCGAAAATAGCTATGAAGCTGGAGTTGCGTTAGCCGTTGAAGCTCTAGG<br/> ATTCTCTAATGATGACCAAGTGGTGTATTAGTCAAGGAATATATAGAAAGAGCTACAAGAAATGGTTCGAGCTCCGATTTCTGAGGTCG<br/> GCTGAGTTAGCTAATGAGCTTGCTAGTGTCTTGCCAGCAAGACTCGAGATTTCAATGGTACAAGATCTGTCGACGCTTCAGAGGAGC<br/> AGCTCGGTTACTACGATTTCTTTAAACGTTATTCGTTGAAAAGAGACTTTAAGGTGAACATGAGTCGCAAAAGACTAGCTATGTTTTG<br/> GGACAGAGTCTTGAATGGTGGAGACGACGAGTTGCCTTTGATTTTCATCTAGGGAAGAAAGTGGATTTACGCATCTCAATTTTAT<br/> CAACTTTAGCTGAGCCACTCGACATCGCAAATTTCTCAAAAATAGAGATATAAAGAGCGGTGGCATTCTGGATGAAGGGAATA<br/> GACCAAAAAGGTATGGTGTGATAAGTGGTGGAAAAGAGCTGGAGAGCTGAGAAGTGTGTGAGAAGCAGATACACTAGCACTA<br/> CGCAAGATACTTGGCTTTGGGCTAAGCTTGAGGAAGCAAAAGAGTGGTGGATGAGGTGAGAAGAGAGAGATGAGGCTCAGAGGC<br/> AATCTTGGTACGGGAAAAGATTGTTCCATTTGAGGTTATGCGCAAAACTGAAGAGAATAAGGAGTTTCTTGGATGAAGGGAATA<br/> GAAGAACTCGAGTTACATTGTCTGGTGGGAATCTAAGAGAGTTTCAGGTCGAAAATGGGTTATGGAATGGAATTGAGATGGTTGT<br/> TGATGAAGATGACGCAATGGAGACTTAGTAGGATTAATAATGATCTAATGTTGATATGCTATAATAACAAACTTTATTAGTACTGTT<br/> GTTCTTCAATTCGIGTAAGACTTCTGATTTATGTTATCTTCAAAAATCATGTAATTAATTAATGTTCAATAAGTTTTGCAAGAGTT<br/> TCTATTAATGTAAGTTACTGGATACTGATGTAACCAACATGTTGATGATCGATAGTAAGCAAACTTTTATGATATTTTTTATAG<br/> AATAGATAGAAAAAAGCTAAGACCTACATGGGATTTCTGGAGATCTCATTGTTACATGATCCAAAGAGCTCTTTCCCAAT<br/> CAGATTTCCCTTCCAAGCTCCCTTTCTTTGGGTAATTAGTGAAGTTAATAACAAGTCAAAGTACAAATAGACAGCCGCTTGTTC<br/> TTCAAAACTTGTGCTTTCTGTTTACATCTCTGTTTCTTAGCTTCTTTCTATTTCACAGATCGTTACGCATACCTTACACACAGCAGATA<br/> TATGATCTGTCTACTACAAGTTCTGATCCTAACGGCTTGTACTAAATCTTCATCATGTGAATTTCAAAATATGTTTATAGTACTCGTT<br/> AGTATTCGTTCTACCATATTTGATATAATTTACTTTATTAAGTGAATTTACATTTCTATTTAACAATATTTTGAAGTCCGACA<br/> AAATAGAAGACACATAGTAATCGTGCAGTCTCCATTAACATAAGCCGTACAAATAGTCAATTTACTCAAAATACCCATCTCTTCAAA<br/> GAGGCCATAGGCTTAGTTCGTTTCGAAACAATCTCCAAGACGATCTAATTAACCAATTTCTTATTATCATCTTATTATGCAAAAAA<br/> ATATACTGGTATTTAAATTTTATCAAAGATTCAAAACCTTAAACCCTGTCTCCCAAGAAGCAACAGTGAAGTGCACCCCTTACGAGG<br/> CATTTGCTCCCACTCTCCACTCTCAGCTCCAGCTGTTACACCCCTCCACATGCAAAACTCACACACACACATTCATGC<br/> ATGCGTATATAACATTTCTCTTGTGAGAGAGGAGAGTGAAGAGAGAGAT</p>                                                                                                              |
| <i>CsDof48</i> | Csa09g067350.1 | <p>CTACAGAATTTCAAAGCATGTTCTTTCTTTGTTTCAACTTCATCCAAATTTCCAAGTAATCAAATGATTGGAACCTTCTTTATCG<br/> TTTTGTCTCAGTTTGATCATTTTCATAGTTGAAACGATTTTTTATAATGAAGATAACGAATAGTGAAGACAGAGAGAGATGTTTGTCT<br/> GTTATATTAATAACGTTGGTATAATATCATTAGATAAATTAATTTTGATAAATATCATTTTTAAATAGGTTGATTAATGAAATTTGATG<br/> AGCGATGTTTGTCTTATGTTGTCGACATAGTCAAGTCCATTTAAAGAGAGGTTGATCAAAATACATAAATTTGGACCAAAATCTTTC<br/> TTTTAGAAATCGCGCGGAGCGGACTGGACACCTTCTACAACATGTCGGTCTTTACTAACTTACGTACCCCTCACATTTGTAA<br/> ACATAAATCATCAAATACATATAGACTGGCCGTTGATCATAAATTTCAAATATATTAATTTCAATCATTAATGTTATCGGTAAAGTTATA<br/> TGAGGTCACATCAAGAATCACGAAAAGAAAAAAGAAAAAAGAAAAAACCCTGTTGAATCATCATGATTTGATTTGTTGGCTTAAT<br/> ATACATTTAGTTTTTTATCTTGTGTTGCAAAATATCCAAATCAGCACATTAATTTCTCTTTGATATCCAAGTTCAGAAAAGAAA<br/> AAAAACCGAACGATTTATTTGGATCACAAAATATAATAGTATTATCATATATTTGAAGGAAACCATATACACAGAAATCTACGAGTT<br/> TTGGATCATTCTTAAGACTGACCGCTCGGAATCTATAAAATCTCGCCATGCAAAAGGTAATTTATTTTATAAGCAAAAAAACAATG<br/> ACGAAAAATATAAAGAAAGATAACTAAAATAAATACTATGAAAAACGAAACTTGGGTCACACCCGAGGAAAACAAGGTACACTCGA<br/> TTGTGAACTCCACCAAGACCACCCACTACCAATTCACCTTATTTGTTCTTTAATTTTCAAAATCTTTTTGTTTTTTATATAT<br/> ATTAATCTAGTAATTTTCGCTCTCTCGTTGTTTTGACCTTTTAAATTAAAAAAATTTGAAGGAGGTTGCTAGGTTTTCTCTCT<br/> GCATGGCCAGTACTTGTCTTTCACATTTCTTTTGGGCCACTGTCTGTAACGTTTGAAGAAAGAAAAAAGGTTTACATGCT<br/> AAGAAAATATTTCTTGTCTTCTCTATAAAGAAATATATTTAAATTTGTCGTTGTAATGAAATACAAATATTTAGGAAAGT<br/> GGATCGGATCGGACAAGTGAAGTGAATTAATCTACCACTTAGATTTCAATCGTCTTTTTCTCATTGATGACAAGTAACATACACAA<br/> TACTAACACACATATTTATCTTTATAAGAAATGATATATATATATATATATATATTACTTTAATAAAGAAATACACACATATC<br/> ATAATATTAATAGTTTCTTCAACCAATGTTATAGTGAATTTGATCAATTTTCATAACATATATGAAACAAATTCATCTGATGATA<br/> TATATACAGTGATACAACCAAGACACACAAATGACGTCGTAGATGATTGACTTGGCAAAATGAAAGAAAGAAAAAAGGTTTCTTAA<br/> TCGACACTTAATTTCAAAAAAGGTTAAACAATAAGTAAGAAAGTTTTTTGATGAAAACAAAAAAGAAATAAAGAGCCTAAGAGAATGAT<br/> GAAAATTTGAAGAGAAAGAGAAAACAAATAAAAAAAGAGTAAAGAGAATTAAGAAACCAAAATTAACAAAGGAAACCTT<br/> CATTTCTTCTATTTATCTCATTGAGCTCTCTCTCTCTCTCTCTCTCTCTCTCTCTCTCTCTCTCTCTCTCTCTCTCTCTCTCTCTCT<br/> ATCTCGACCTTACCTAAAAAAGAGAAACCAATTTAAAG</p>                                                                                                                           |



| Name           | Gene ID        | Promoter sequence                                                                                                                                                                                                                                                                                                                                                                                                                                                                                                                                                                                                                                                                                                                                                                                                                                                                                                                                                                                                                                                                                                                                                                                                                                                                                                                                                                                                                                                                                                                                                                                                                                                                                                                                                                                                                                                                                                                                                                                                                                                                                                                                                                                                                                                                                                          |
|----------------|----------------|----------------------------------------------------------------------------------------------------------------------------------------------------------------------------------------------------------------------------------------------------------------------------------------------------------------------------------------------------------------------------------------------------------------------------------------------------------------------------------------------------------------------------------------------------------------------------------------------------------------------------------------------------------------------------------------------------------------------------------------------------------------------------------------------------------------------------------------------------------------------------------------------------------------------------------------------------------------------------------------------------------------------------------------------------------------------------------------------------------------------------------------------------------------------------------------------------------------------------------------------------------------------------------------------------------------------------------------------------------------------------------------------------------------------------------------------------------------------------------------------------------------------------------------------------------------------------------------------------------------------------------------------------------------------------------------------------------------------------------------------------------------------------------------------------------------------------------------------------------------------------------------------------------------------------------------------------------------------------------------------------------------------------------------------------------------------------------------------------------------------------------------------------------------------------------------------------------------------------------------------------------------------------------------------------------------------------|
| <i>CsDof49</i> | Csa09g099480.1 | <p>AAAGTCGCATATGGAGGAAAATAGAGGCATTAGAAATGIGTTTCTATAAATGATATCCAACATGTAATGATGATTTTACAAGGGAGAG<br/> CCGTGGATAGTGGATACCAGCTAACTATAGTATAAATTTTTCGGTGGGGGAATTTATTATTTGGCACACTCAAACAGCATTGTGAA<br/> AATTTCTGACGTAAAGAGAAAAATGAAAAAATGTGTGTAGTCTAAATGTCATAAATAGTAAATAAATAAATAGGTGTATCCTAAAA<br/> CGTAGAACACTGACTAGGGGGTAGTAGTGTGAGGTGGATCGCAATAGAAAGAAAGATGGTCGGCTATATCTCTCGATACGT<br/> TTCTTACGGCCAGAAATGAGGCAACAGGTGGGCCTAGCAAAGATGACTAATCTCCACCGTCCAACTTAATACACAAAAATTTCCGA<br/> TTTTCTCTCCACAGTCAGAGGTCAGGTCAGGTCGACTAACACACCACGATCTAATATTTTTCGTTCTCGTACTTCTAATACAGACTTAC<br/> TTTGTGTTGTTTTGTTTTGGGTGCTATTCCCTGTGGAGTCCAAATCAGCTAGAGAGACACGTGTCGTATACCCAAAAGATTCAATGGC<br/> CGGTGTGTATATATGGGTCCAGTCTCTGTGTGATTTCCCAAAATCTGACGTACAGGCTGAAGTTCGGCCGTGGTCTACTCAT<br/> CCGTCAAACCGCGTTACACAGTGGAAACACGGCTGAAAGATGGAACAGTGTGCAATCTGGACCACACTAGGCTACATTATTTAAA<br/> ATAAAATAAATAAATAAATAAATAAATAAATAAATAAATAAATAAATAAATAAATAAATAAATAAATAAATAAATAAATAAATAAATAA<br/> CTCTTGCTGTCAAAGACAACCTCAGGCAACTCTGTTCTCGTAATAATGATATTTCTTAATTTCCGCAACTCTCTCATCTCATACA<br/> TGTTAAAAGATGAGATTTGTGGTATAAAATGTTTTAATATATACAGTATGATTAACCTAATAAATAAATAAATAAATAAATAAATAA<br/> ACTTATACGGTACATTAGTCCCTACTCTGGTTAATTAATCTGGTTACGTTTGAAGAGTCGAGAGATACTATTGGATGGATTAGTGGCG<br/> GCTGTGGCTAGTGGAAAGAAGAAGAGACATGACGTCCTAATACACACACTGTTTTCTAGTATTTCTTATATATTATGGTCTCCTTCA<br/> ACAATTTTTTTCCAATAATATAAAAAACAGTTTCAAAATACTATATGATCAAACACACACAGGCTAACAAAATAGCAATATATATA<br/> ATTTAAAGAAAGTAAATAAAGAGAGAAAGAAATAAATGGTGAGATAATTTACTGAGGTGAGTGTAGTGTGTTGTTGTTGTTGTTGTTG<br/> GATTCGTGGGACGGCGGGGAAATAGTTTCTCGTTTACAGACTGTGGTGTGTGTGTGTGTGTGTGTGTGTGTGTGTGTGTGTGTGTGT<br/> GATTGAGACCAACCTCTCTATCTCTCTCACATACGAAAGAAGAAATCCATCAAAGCACACACACACTATATATAGTATATATAGTAT<br/> CTATCTAATAAATAATATATATATATCTCTCTTTAAAAGTGACAAATATTTAATAAATAAATAAATAAATAAATAAATAAATAAATAA<br/> TCAAAAACAGCAGCTTAATTAAGTACCTTCCACACACACTTCTCTCTCTCTCTCTCTCTCTCTCTCTCTCTCTCTCTCTCTCTCTCT<br/> TTCTCTCTCTCTCTCTCTCTCTCTCTCTCTCTCTCTCTCTCTCTCTCTCTCTCTCTCTCTCTCTCTCTCTCTCTCTCTCTCTCTCTCT<br/> TTTTTTTTTCAACTTTTCTCTCTCTCTCTCTCTCTCTCTCTCTCTCTCTCTCTCTCTCTCTCTCTCTCTCTCTCTCTCTCTCTCTCTCT<br/> TTCTTTGAAAAAACAATAAATAAATAAATAAATAAATAAATAAATAAATAAATAAATAAATAAATAAATAAATAAATAAATAAATAAATAA<br/> TTCTTTGAAAAAACAATAAATAAATAAATAAATAAATAAATAAATAAATAAATAAATAAATAAATAAATAAATAAATAAATAAATAAATAA</p> |
| <i>CsDof50</i> | Csa10g003120.1 | <p>TCGACAAACCCGGTATGCACATCGGTGTGGTAGGATTAGCGGTTTGGGTATGATAGGAGTGAATTTGCCAAGGCTATGGGTGTGAA<br/> AGTTACGGTTATCAGTACTTCGGAGGGTAAGAGAGACGAGGCTATAATCGGCTTGGTGGCGATACCTCTTGGTGAGCCGTGACCCG<br/> AAGCAGGTCAAGGATGCAATGGGGACTATGGATGGTATAAATTGATACTGTATCTGCGACTCATCCGCTTCTCCATTGGTTGGTTGGT<br/> GAAGCATAAAGGAAAACTGTGTTATGGTGGTGCACCGGTGAAGCCACTCGAGCTACCTGTCTTGCCTCTCATCTTTGGTAAGCTATAT<br/> TTGTAGTAACTACTAATCCCTATATTAATTTACATGTGCTAAATTTGTAGTGTGTTAGTCAATGAATCGCGAGAATGACATGGATTTT<br/> TGTGTGTGTGTGTGTGTGTGTGTGTGTGTGTGTGTGTGTGTGTGTGTGTGTGTGTGTGTGTGTGTGTGTGTGTGTGTGTGTGTGTGT<br/> GGAGATGATGGATATGGCCGCAAAACACAACATCACGGCAGATATTGAACCTTATCTGCGGATTATGTTAACACCCGCTATGGAGCG<br/> GCTTGAGAAGGCTGACGTTAGTACCGATTGTGATTGATGTGTGCCAACACTTTGAAGCCTTCTCTATTTATAAGTCACTCTTAATG<br/> TTAAAAATTTCCCAAGCTGTTTTTTCTTCTTTTGTGTTGGTTGTCTGTAGTATTAAGTTTGTGTGTGTGTGTGTGTGTGTGTGTGTGT<br/> ACTGTGTGGTATGCTTTAATCAAAGTAAATGAACCTTTAATATTAGTCTCTATATGATAAAAAATTTAAGGGTAAGCAAGTATGATC<br/> AATTAGTATATATCTAAGATTTCTATAGATAACACTCGAGTGTATCGATGAGATCTTTAGATGAAAGAATAAATAAATAAATAAATAA<br/> GTTAAATAATCAGTTTTATCTACTACTATTAGCGAGTATCAACTGAGAATAAATAAATAAATAAATAAATAAATAAATAAATAAATAA<br/> AGTTATCTTACATTTGGTGAAGAGCAATAGAAGTGAAGTCAAAGAGGATAAATAAATAAATAAATAAATAAATAAATAAATAAATAA<br/> GTTGCTTCAAACAAGAGAGGGGAGACAGTGAAGTTCGAGTTTGTTCCTCAATGAGAAAAGCACTCCACTCTTGTATGGCTTCCCTTT<br/> CTTACCCTGACTTTTACCCTCATCTCTCTCTCTCTCTCTCTCTCTCTCTCTCTCTCTCTCTCTCTCTCTCTCTCTCTCTCTCTCTCT<br/> ATATAATAATAAAGAGCATATATATATAAAGGTTTGAAGCTGGAATGAATTAATTTAGATAATTTAGAAATTTGGTAAATTTTCCCTA<br/> GAGGAACAGCTTAAATAATTTCTAACAATAACAGAACCCACTGCAACAATACTGCTTATGGATAGAGTGGTGTCTATTGTTAAACCC<br/> TTGATATAAATAATGTTAAATAATGACTTAAACTCTAATCTATATACTGTATTAATTAATCTGTATTAACACTAAAAGAAACTGGCCAG<br/> AGATAATTTTCTTGGCAGAAGATCAATATTTGGCTATTTACGATAACGGTCAAGCTTTTTCACCTAATACGATTAATGTAATTTTCA<br/> GCCTGCGTATCCATGGCGATATGCAACAACACTACAAGTTGAATAACACATACTTATAAATAGCCAGCCAGATACCAATTTATATGAT<br/> GTAAAAAAGAAAAAGAAAAACATTTATTTAGAATATACACATTCGGTTAAGACATAAATAAATAAATAAATAAATAAATAAATAAATA<br/> GTGCATGTACACATATATATATATATATATATATATATATATATATATATATATATATATATATATATATATATATATATATATAT<br/> CCAATCTCCCTCTCTTGGCCATATTACACCATCTCTCTTGGCCCATATC</p>                                                                                                                              |
| <i>CsDof51</i> | Csa10g018980.1 | <p>TGATAATATACTTTATATCGTGAAAAAAAGTTATACTTTATGTACCTTTTCGACAAGTAAATTTTTTCTTTCAATTTGATAATTATAT<br/> ATTTCTAAGATAATCTTCAACAAGATAGTTAAAAAGGCCACACCTCTACCTTTGCAAAAACGATTTTGTCTTTTAAAAGGTAAT<br/> TGCTGATTTTTGTATTCAATCTGTGATAATGTATATGTAGCATATATAGTGTGTGTGATGCGTTACTTGTAAAGTGTACGTATAT<br/> ATATAATCAACTAGTCAACAAGGTATCAATGAATTAATGTAATTAATGTAATATATAGTAAATATAGTTAACTAAATATGACACATGATG<br/> ATACACACATAACGTTAAATTTATATATATATATATATATATATATATATATATATATATATATATATATATATATATATATATAT<br/> CTTCCAAATTAATGTGAAACATTTCAACAATTTTTTTTTGATAAAAAGCTAGATATATAGACATATTAATTTACGTGTAACAATAT<br/> AAAACACACATCATATTAATCTACTAAATATATTTTTGGGTCAAAAATGTGCAAAACACTTTCCCATAACTTCTAGAAAT<br/> AATAAATAATTAAGAAATGTCTTTAACCAAAAAAACAATATATGGGTAAAGAAGCCACTTTCCGTGATTTACTACGAAAAGA<br/> CGACTCGACTTTGAAACAGAAGAAGCGCAATCTACTTTAAAGTTCAGGCATCAAAATCAAATTAAGGAAATTTGTAGTACTATAT<br/> ATATATAGTTTTACAATTTAAAGAACAACAAGTGAATAGTTGTGGACGTTAAGACTTAAATATCAATACCTAACTAATGACCAAAA<br/> TTCTCAACCCGACTCTGATTTTTCAAAATTTGAAAGTTCCTTGAAGTGAAGTGAAGTGAATATATTAACAATTAAGAAACTGATA<br/> GATGATGTTTTATCAGATAACACATGTATATTGATAGTCAAAATTTTCCAAAAGCATAACCCATAAATTTGCTTGTGCAATAGGATTTAC<br/> GTTGTAACCTTTTAAAGAGTTAAGCGGTTGCTACTGTTTTTTTTTTTCTCTCTCTCTCTCTCTCTCTCTCTCTCTCTCTCTCTCTCT<br/> GTTCTGCATTTAGCTAGAATTTTTATTTATTTTTGTGCAAGTATTTTTATTTTATTTATGTTGAGTCAAAAATAGTATTTAGAGACTG<br/> AAAAACGCAAAATTCAGTTTAAATTTGATTAGCATCCAATAGTATTTAATAAATAATTTAAATAATACGATAGTATTTTTCTGAAAAA<br/> TCATGTTATCTTCAAGTTCAGAGACAAAATTTGACGATCTTGCAAAAGAATAATTAATAAATAAATAAATAAATAAATAAATAAATAA<br/> AAGAATCTATAAATAATGTTATTTGAATCAATTTAATAAAGAACTGATTTTTGGTAATGAATTAATAAATAAATAAATAAATAAATAA<br/> TATTTGTTTTATTTGAAAGAAAAAACAATTCAGGCTATATGTAATCGTATGTACTCCACTTAAATTAATCTCTCATTAATAAATG<br/> TGGAGAGTTCTTTGGCAAATTAAGATGCGTGAATATAAATAAAGCCATACATACATGCTTAAATAAATAAATAAATAAATAAATAAATA<br/> AGCATTTGTTATTTTTCAGTACGACAAAAGATTTCCACTCGGAATGTTTTATTAATCTTATATTAACAATTTGTTCTCTCTCTCTCT<br/> CTCTCTCTGCTAGTCTACCATAAAGCAAATGTGATCAGAGACAAGCATACAAAAGAAAGTTCCTCAAAAAGAAATTTCTCAGC<br/> CATCAAAATTTTTCTTCTCTCTCTCTCTCTCTCTCTCTCTCTCTCTCTCTCTCTCTCTCTCTCTCTCTCTCTCTCTCTCTCTCTCTCT<br/> AACTATCAGTTTTTTGTTTGGCTGATCTGAGGAAGTTCATCT</p>                                                                                                                                                            |







| Name           | Gene ID        | Promoter sequence                                                                                                                                                                                                                                                                                                                                                                                                                                                                                                                                                                                                                                                                                                                                                                                                                                                                                                                                                                                                                                                                                                                                                                                                                                                                                                                                                                                                                                                                                                                                                                                                                                                                                                                                                                                                                                                                                                                                                                                                                                                                                                                                                           |
|----------------|----------------|-----------------------------------------------------------------------------------------------------------------------------------------------------------------------------------------------------------------------------------------------------------------------------------------------------------------------------------------------------------------------------------------------------------------------------------------------------------------------------------------------------------------------------------------------------------------------------------------------------------------------------------------------------------------------------------------------------------------------------------------------------------------------------------------------------------------------------------------------------------------------------------------------------------------------------------------------------------------------------------------------------------------------------------------------------------------------------------------------------------------------------------------------------------------------------------------------------------------------------------------------------------------------------------------------------------------------------------------------------------------------------------------------------------------------------------------------------------------------------------------------------------------------------------------------------------------------------------------------------------------------------------------------------------------------------------------------------------------------------------------------------------------------------------------------------------------------------------------------------------------------------------------------------------------------------------------------------------------------------------------------------------------------------------------------------------------------------------------------------------------------------------------------------------------------------|
| <i>CsDof61</i> | Csa11g094130.1 | <p>GAGAGTATGGCTAAATTACACATTCTCTCTCCACGACACAAGGTTCAAAAAATCGTATCATATATACTCCATAAGATTCTATAAA<br/> TTATAAATCAACTATAATATAGTATGATTTAACATATGTGTGGATATGGTCCTTAGACCAAAATCTCGGCTTCATAGAAGTGTCTTT<br/> CCGAAAACCGATGTGTGATTTGTGTCTCTATGAACTTTAAAAATCCCAATCCGGATAATGCAAGCACATCATGATGATGAGCTATATAC<br/> AACACATTGTCCGGCCAATTTCTTTGCTTTTACTTCACTATGTTCTTATTACATATCTTAATTATGTTGATATATAAAGCAATATGTAC<br/> CTAGAATTTATTTATTCACATTTTAAATAATATATTTCTTTTAAATATCCGTAAGAAGTATTTAGTTTGTGTACTGATGATAGTTGTT<br/> ATCCGATAGAAGAAAACAAGGCTTAAGAAATCGTTAACCGACTATAGCTTTTATGCGTTCACAAATGCAATAAATCCCATGCTAAGAA<br/> ACCAACAATACTAATATAAATTTGAGTATCTGTAATTTGTTCTGCTTTAAACATGGAATAGAATGAACGATCGAAATAGAAAATCA<br/> CATATATTTTGTGTACGAACACGAAGGTCACATTGAAACGGAAGGGTCCATTTAGGAAGAAAACAGACATTGGCGATGAGTACG<br/> GGACCCGCGTGGTGACAACCTCAACGGACCATTTGGGACATAAAACACAGAAATGACAACGAAAGTATAGCAGGTGGGAATCCGCACTCG<br/> AATCCAACCATCTCTATCCATCATCGTACGGTTACTATTCATCTTGAATCATATAGATCCGATATCACATTATTTGATAACGACGAC<br/> TGCAACTCATTATTTATATAAAGTTGACAGCTTAAACCGATACATTTATGGTGGAGTGGCTAATCGAGCTTAGTGATTATTTCCGGACT<br/> CCAGTTATAGACTTTTAGGCTACAAAAGTTTGTATTTTACTTCCCAAGTTTCTGTTGGTGTGATTTCAATTAATTAACCTCAATAA<br/> ACTCAAATTTGATTAGTAAAGTTATTGTTTTTCTGTAAGATATTACAGTCAAAAATATAAATGTTAGATTATTTGGTAAATA<br/> TGTTAAATATGATTAGTAGTATTCTGAGATATCAAAATCAACCAAAACATTAGTATTGGCACCATAAAAAAATCACTTTTTTTTTT<br/> AAGTAGTACTTCAACAAGTCTGAAGAGAGATGTAACACATTTGTCATCAGTTTATGATCTTCCCAATCTTCAACTAATTAACCTCAAA<br/> TTATGTAGAGATAAATTTATAATATGCGTTCTGTATGTAGAATTTTGTTCACATTATAAAAAATGAATAAACGGCGGCTTTATGTCTG<br/> TTCCAAATCACGTTCCGAATTTGGTTCACATTATCTCTTTGTGCATACCACCTTTTGTAAAAAATAAATAATATAAATAAATAAATAA<br/> ATATAAAGGTCGAGGTCACAACAAGAATAGTGTCTCTCTCTGCTCCACATTTCCCATGTATATACAGAGTGGTATTTGCTTCCCTT<br/> TTGCTTCACTTTAATTTTACTCATATCCATCTCTCTCTGATCTCAAGAAAACATCTCAATCTCCCAACACATAAACACTACTCA<br/> CACTCATTACTCTCAAGCAGCTTCTCAGTTTCATCATCAGCTCTT</p>                                                                                                                                                                                                                                                                                    |
| <i>CsDof62</i> | Csa11g094710.1 | <p>TATCATATGTACTATAAATATTTTGAAGGCTCTTAAACATTCATAAAACCATGGACTGTAGATCTAAAATTTGGTTAGGATGTACAAA<br/> AATAGTTGTGATTACTTAATATGACAACCGGACAATAAATGCGACTACAAGTACCACATTTGTACACATACCGCTACATTTCTATTACC<br/> AAATAGTTTTATCATTCTTAAGAGATATACGGTGACGTGGTACAAGAGGAACCACTGGAACAGGCCACAGGGCTCTTTGAATCAGCAG<br/> ATAAAGCGGGGTGGCCGACAAGTCGACAATCCAATTTATGTGGATATCAAACCTTACGTTTATTACCCCTCCACGTGCCCTCTTATCC<br/> ATCCATATCAACCGCTTAGATCATTCTTCCCAATCAACAAAATCTTGCCTCACTATTATTACGATAGGGTTAAATTTGTATGCC<br/> AAATCCATCTTTCAAAAATTTCTTGTGAACTGACGTGTTAATTAAGAGGTAGACTATGATGAATCCGGTATAACTCAAACGGA<br/> AGATATCTATTTTGGAGAAAAAGATTAAATAGTAAGGTTTGAACGAAAGGAAAGCATTTCAGAAAGGACTGTGTACCCTATGAC<br/> AATTGTTAAAACTACTATTCAAGTTGATGTAATATTCGTGCATCTGAAAGCGATATATACGCTAAAATACTAATAATTAATAAT<br/> ATTGAAAGATTGGCTTTGTAATTAATTTGGCAAGTGGCAACTATATTTCACTGTTCAACCTTAAACATAACAAATGTTAGACGA<br/> TATATACTAGATGTTAGTTTCTTGTAGTTGAAGCAAGGATTGGACCTTTTGCATTTGCCTCCATTATATTTCCAAATACAAAAAGTTT<br/> GTCAAAAACAAATGCGCAATCAAAAGCTTACGCGTAACCTTCAAAATCCAAAAGGAGCCTCCGCAAAAATACCTATTTATGTTTGT<br/> CAATTTACACGCAAAAGTAAATTTCCATCTATATATTAATCAACAAAACATAAAGTACATAAGAAATTTCTTTTTCAAGCAACG<br/> TAGTTTCAAGTATGATATTAATTTATCTTGTGGACTATGATGTGATATGTTAGACTCAGTACGAGAATAAATATCTAAAGATTAATAAC<br/> AATTTATACAGCATATATATATATATATATACGTAACACTAGTCAACTCAATTCACAACTTTTTCATATAGTACGGGATTAGAA<br/> ATTAGTAGGTTATTCAGACTTCAATTCATTTTGGCAGAAAGAAATCAATTTAAAAAGTTTATGGAATATTTGAAATTTGAATTC<br/> TATTTTATTAATACATGATCTCATGTATATTCGTTAGAAATATTAACCTTCCCAAGAAGTAAATTTGCAATCTGTTTAAAGGAAAC<br/> AATGTAATAAGTATGAATTTTCGATGGCGAAACAATAACATTTTTTTTAAAGTTAGTTAAAAAATCATCGCATTAATATTTT<br/> AAGCTTTTGGGATTCAATATAATTCGATGTGAACTAAAAAGATTTAAAAAACAGGATTTATTTATGTTTTTTTATAAATATTTT<br/> GTCAATCATTTGGATATTTTGTGCGACTTTTGGCATACAAATAAATATATACAACCGAAATATAACAAATCGTTTAAATGCGAAGAT<br/> ATTAATATTAATACATAACATAAATTTGATGGGGCAAATTTTGGACTCGAAGCTAATCTGAAATACAGCCACGGAGGGGATTGTA<br/> AAATACAAAATATCGCATGGGCAGAACCGTCATTTGAAGATAAACTGCCTGTTCCGACATATGAAAGATATGCTTTGTCAGAGAGTTT<br/> CAGAAGAAGTCTTCCCATGCTTACCCTTCACTTCTCTCTCTCTCTCTCTCTCTCTCTCTCTCTCTCTCTCTCTCTCTCTCTCTCTCT<br/> CCAAACTGTAGATTGTATATTTTCTTATCATCTCTCTACGAA</p>                         |
| <i>CsDof63</i> | Csa11g099290.1 | <p>CCATTGCCTGAAAACATGAAGACTCCTGGAGCTAACGCAATGGACATGGCGGTGGTGGTGGTGGCGGAGGTGGTGGGAAGAAGAGGC<br/> GGCCGTGGTGGTGGTAGAGGGGAAGATTGAGAAAGATAAATTTGCTTGTATCTTTGATGCCGCTTTGTTTCAAGAAAATTTTGAAT<br/> TTTCAGATTTAGTTAAAAACATGGAAGTTATGATCTTGTGCAATGCTATTTGATTTTGTTCGAAAAAAATTTGTCAGTTATGACTTATTA<br/> TTATTGCTTAAGAAGAAGATGACGAACCTTGTCTATCTTCAACATCAGAAGAAAACCAAGACGCTTCAGTAGATGAGTTTCATA<br/> AACAAAAAAACAAAAAAACAAAGACGCTTAAAGTCTGGTGTGTTTTCGAAACGCTTAGACAACCGAAGAAGAACTCAAACATA<br/> TCAGAAACCGAAACCGTGTATCAACCAATCCCATAGTACTAGACTAAAGTTTGTGATGCTATAAATTTGAAACCAAAAAATTTCCAAA<br/> ACCAAACTCGAATCAAGTCCGAATTTCTGATTAACACCTTCAAGTTGATAGCGTAGTTAATAAAGCAATTTGGGGGTGGTCTGGA<br/> TAATCGTCTCTCACTTCAACCTTTACAGCTACATCATTTGATCCAGACTTGCATATTTCTTACTCTGTTACTTTGGAGAAAGTTATATTT<br/> ATTGCTTGCATCAGTGCATATGATGATTTGTTTTGTTACTCGCTTTTATAAACTTCAATCATATACTTAGAAGTATATATGTT<br/> TAATTTGGGAAAACAAGATAGAATTTCAATTTGTTGGCATCAACAACAGAGACTGTTTCAAAAAAATAAATAAAGCAATTTGGGGGTGGT<br/> GTAACGAGTGAATAACTAATGTTTACGAGCCCTCTAAGAGAAAGTCAAGGCTGAAAGCCTTAAACTAAAGCTGCTAAATGAGTTA<br/> GGTCTTAAGCCTCTTACAATATACTTTTCGACGATGAACATAACCAAAATCTTGTATTTACCTTCTTCTGACAGCTTCTTAACTTAACTG<br/> ACAACATAACCGTTTACATAAATTTAAATTCGTATATGAGGATTTATATGTTTGTGATTTTTAAAAATAAATCTGCAAAAAAACTGAAT<br/> CGAAAATGTTTAAATCTTGTGCTTTGCTTCTTACTTAAACACAAAGATTCAATTTAACTTCCGGTAAAATATACCTTCTAA<br/> CAAAAAGAGGGTCTTTAAACAAAAACGATTAGAAAAATAAATAAAGATGGTATTTCTCTCTCAACCAAAAGTTGGGATCGT<br/> TTTCAAATGAGGAATATAATTTCCAAACGACCAATAAAGAATATGCAACGTAACAGACAGCTCTGTTGTTCAACGGAATTTAGTGAAGTCTT<br/> TCCCTCGATGCTGACATTTACCTACCAAAAGTTCGTAACAGTTTACATTAAGTTTATTTGTTTCAATTTCAACCAAAACAAATAGAG<br/> TTGATCACTGTTAAGATATGTTATAACCAATCTAATACCATATAAATAAAGCGTGTATAGACCTTGCATGTTGACTACATGCTCTT<br/> AATTAGGAACACTTCTGTTCTTCTGATATAGGCTTTCACTCAAGTACTTGTGAATTTTTGTTTCAACGGAATTTAGTGAAGTCTT<br/> AATACAAATATATATATAAATAATGATTTCTTACAAAGATTGGAATAATTTTAAACAAAGTTTAAAGAAAATAACTAAAAGATTA<br/> TATGCTATATGGGTTTTGTTGGAAGAAAAGTAAAAATCAGAGGCCACATAAACTTGTGGTTGAGAATGAAACAAAATGCTGACATG<br/> GCATCTACTTCACTTTTTTAAACGATCAAAAATCCCAAACTCAGGATTTCCAAACCAAAAAATTTCAATCTTAAACCCATACCTCAAA<br/> AAAAAATAAAGCGCTTCAAGAGAAACCTACGAGAAAAAAGAAGAAGAAATA</p> |















| Name           | Gene ID        | Promoter sequence                                                                                                                                                                                                                                                                                                                                                                                                                                                                                                                                                                                                                                                                                                                                                                                                                                                                                                                                                                                                                                                                                                                                                                                                                                                                                                                                                                                                                                                                                                                                                                                                                                                                                                                                                                                                                                                                                                                                                                                                                                                                                                                                                                        |
|----------------|----------------|------------------------------------------------------------------------------------------------------------------------------------------------------------------------------------------------------------------------------------------------------------------------------------------------------------------------------------------------------------------------------------------------------------------------------------------------------------------------------------------------------------------------------------------------------------------------------------------------------------------------------------------------------------------------------------------------------------------------------------------------------------------------------------------------------------------------------------------------------------------------------------------------------------------------------------------------------------------------------------------------------------------------------------------------------------------------------------------------------------------------------------------------------------------------------------------------------------------------------------------------------------------------------------------------------------------------------------------------------------------------------------------------------------------------------------------------------------------------------------------------------------------------------------------------------------------------------------------------------------------------------------------------------------------------------------------------------------------------------------------------------------------------------------------------------------------------------------------------------------------------------------------------------------------------------------------------------------------------------------------------------------------------------------------------------------------------------------------------------------------------------------------------------------------------------------------|
| <i>CsDof82</i> | Csa14g051530.1 | <p>ACTCATTGAGGGAAGTCTAGAAATGGTTGAAAGCTCCAAATGGAATTTTGACATGGAAATTTCTCCTCAGTAAATCATAAAAAGAAATAGT<br/> TTCTTTCTATATACCAGACCACCATCAAATCATGCTTTCATGTGTATAGTTACATCCGAAGCTAAACAATTTTGTGTAGTAGCAGAG<br/> ATCCACTTACCAAGTCCAACAGCCTGAAACTTATGGTTTGGGAGATGTTCTATGTGTGAGTTGGCCAGAGCATAAATATAGACCAG<br/> CAACATCAATGAAGCCAATCATTGCTTTCAATGCTTCTGATACAAGGGAGATGGAACCCATACCTAGTCACTAGTATGTAAACATA<br/> CAAAACAAGCTAAGCAGTTACAGTAGAAGTTGATAGCAAAAAAGAAATCAACAATGTGCATCTATAATAAGAAAAGATAAGTCT<br/> GGTTAACATTGTATTATTGTCATATCATTCTTAAAGAGTAAAGATGACAACCTTTTCAACATCTTTTAAACAGAGAAATAAACACAG<br/> ACTCATATAAAAAAGTGTGAGTGTACAGTGTCTTACGTTAGCTTACAAAGTAAAAAATACCTGGTATGGGTCAAATACTTCAGTCT<br/> CAGATACTGCAGGAAAGTTGCCAAACAACAAGCTGTTATGAAAAACAACCAATGAGCTGAGAATTAAGGTATAAGCTTAGCTAAAG<br/> AGATTCTCCCAAGATTGTTATAGTTGACTAAACCTTAAACCAAGCTGTAGCAAGGTAACCAACAGCAGCTTTCACGGAGGTTCCAAG<br/> TGTGTATATTGATCTGCAGATTCAACACTCCCGGTTTCAAACTATACCTTAAACATAAATCTAATCCCAAAATCAATTTGGGGAT<br/> TCTCAACACCTACGTTCTGCAGAAGCTCATACTAAGCCTTAAAGATTAGATCAGCAAGTTTGAAGAATGAGCATTAAAGTATATGCGC<br/> AAGAGGATCTAGATAAAATCTTAGATTAGGCAATGAATAAACTAAGAGATACTAAAAATTTGAAACCAAGATCGCAAAAAAGGAGAG<br/> GATTGTTCATACAAGGAGTGGCAGAGTAGTAGACGGCATGAGGACCGAATGTGAGAATCGCACAGTTGAAGAAGTGAAAAAGCGT<br/> CATCGTCTCTTTGTGACACCAATCGGGAGCTACACAAGTCCGGCAGCGCAAGACGACGACCACCACGACGTGAAGCTGT<br/> GAAATGAAGAAGAGGAGGCTTGGTTAGCTGAGAAAATCTGAAAATCTGATGGGATCAACAAGTTTTCGAAATTTTCTTGTAGTGTCT<br/> CTCTACTGGCCGATAAATTTATAGTCTATGGCTACGAAAGTTAATATATGACGATGTTTTTTTTAATATGATGATGTTTATAATTGT<br/> TAAATTCATATTTGATTTATTTGGGGTCAAATATCTTTGAAATTTTTTCTGAAATATAGGTTTCAATGAAATCTTATGCTTTTTCT<br/> ATATTTGATATTCCTTTTTTCAAAAAATTTTTCTCAAAATTTTAAATATAGTTTGAATTTTCTTAAATTTTCTTGTAGTGTATG<br/> ACTATTGACTATATGTTAACTTCTAATCTTATAAGCGCTAAAGGCTTAAACCGTTTATGATGTCTATCCTGATTAATTGCGAG<br/> TGCAAAATTTGAGACTATTTAAGTGTATTGCTATGAAGGAATTGACCTAAAACAAAAATCAAATATAAATCTGTAAACCAAAATCCAT<br/> TACCAACCAATTTCAAATAAATCTAATACTAAACCTTCAAATTAAGGAACATATAAAAAAGGAACTATGAAAGTAAATCAAAACAGCACTG<br/> AAAGTAACGTCAAAGGCTCTCTATATAAAAAACCAACACCACTCTCACAACTCCCTTCTCTTTCGCTCTCTCTCTCTCTCTCTCT<br/> CCCTTCTCTCTAATTAACCTTCTCTGTCGTTTTCTCATAAATCTCAACTTCTA</p>                  |
| <i>CsDof83</i> | Csa14g059960.1 | <p>AAATGATAAAATGTTATAAGGGAACAAAACCTACGATAGTATTAGTTACGTCAACAGGTCATAGGTTAAAGTTCAACGCGTCAATCC<br/> TGCAAAAGAGAACTATTGGAGGAAATTTCTAAGAAAGTTCGCTTATGTTTATATTTTTTTTTTTGTTATCCATAAAAAAAAACATAACA<br/> AAGTATTTAAATTTATTGAAAATTTTAAAGACAATTTTATATAFAAAACAAAATACGCAAGAGAAAAGAAAGGTTATTGAAA<br/> ATCAACAAAACCATGACTTTTGGAGAAACAAAGTAGAAAATTAATAGCAAACTTACAAAATAGAGAAAAACAAAGTCCGGTGTGTCA<br/> CAACAAGAAAGCAAAAAAATAAAAAAANACAAAGAAATTTTAAAAATCATGAAAATCTTCAACGAAAAATATTTCTCAAAAAAT<br/> ATCTATTTTTTATTGGATGTTAATATCTTTTTTGTAGTAGAAGAAAATACATCAATTTAATTAAGTTGTCGATTTAATACCTAAACTA<br/> ATAAATTTTATTAGTTTCTGACCTAAGATTTTTGACAAAAATAAAATTTCTGTTTTTACTTCTACTGTATCAATTAATAATTAATTTAA<br/> ATGATATGATATTAATTTAAGATTTATTGATTTTAAATTAATTTTAAATATTTTAAATTTTAAATTTTAAATTTTAAATTTTAAAT<br/> ATAGTCATTTTATCAACCCCTAATTCCTGTTTATCTTTTTGCTCGCCGTCACGGACTCACGAATTTAATTAAGTTGTCGATTTAATACCTAAACTA<br/> AACCAACACATGTTTCACTCCTCAACATCGCTTGTACAAACAGCAACCTATTCTAAAAAGACATCTACACTGCAATCGGATGGATTGATC<br/> CCGCTGCGCAACGATGAACACTATCTACGAAGTCTTCAACGCTTCCAAAGCTTCAACACTTATCGCTCTGCAAGCATCGTTCCCGC<br/> TAAGACAAGGCTGAGATCGACTTGTCTAGGATCTCGCGCGCTGTTAAGGCAAGTGGCAGTTGTTGAGCTTTCCGGCGCAATGCTA<br/> GTTATCTCCCGAGATTGGAGTTAGGAACCTGTTGTTGCTTGTGCTATTACATTTTATGGGGATTGTTTTACTGTGTGTTGTTCC<br/> TGATCTAAAAGGAAGTCTTGAAGAGATATTTGGGAGAAAGATGAGGAACATATAGGCGGGATGCGGGGAGATGACTTTTCCG<br/> ATTTGATTTTTTTTTTAAATAACTCAATATATCATAAAATCTGTTGCTGTTGTTGATGGCATTGATCAAACTATATCAAACTATATCA<br/> ATCATGAAATTCATATATTCCTATGTTTTGTTTAAATGACAGATTCTGAAAGAAAGAAAGCAAACTGAGTACAGGATGCTCAGATCTTAAAT<br/> TAATTTGTTAATTTGTTAATAAATTTGATTTTGTAAAAACAAAATGTAATAAAAAATAAATATAAATAAATTAATTTAATTTAATCAA<br/> ATAAACTATATAATTAATGTCATATTTTAAAAATTAATTAATTTGATATAGATATGAAACTAACAAAATTTTTAGTTTATGATATT<br/> AAATCATAAAGTTTTAATTAATGATGATTTTTCTTCCAAATAAAAAAGAGCCAAAACCTGAGTACAGGATGATGATGATGATGATGATG<br/> AAGTATTTTTAAGCTTTTTTCCCAATCTTCAATGACACAAAACCTCTACCCAAAAATAAATAAATAAATAAATAAATAAATAAATAAATA<br/> AATGTCATTTTGTGGTAAAAATAAAGAAAGGAAACTCGTAGTTACCCCAACCAAAATAGCTCCACTTTTATCTCTCTCTCTCTCTCT<br/> CTATATACTTACAACCTTCTCCCTCACTTCCCAAAATTAAGAATCCATTTTTTTTTTAAAGGTTCTCTCTCTCTCTCTCTCTCTCTCTCT<br/> CCAAAACAAAACATATCTTGTAAATTAAGTCAGAGAAAAA</p> |
| <i>CsDof84</i> | Csa15g031650.1 | <p>CCAGAAAAGGGAATCCGATTATAAGCAAAATCGTATTGTAGCTTCTCTCTTACATGACTTTTGGAGAGTTGTTATTTGGAAATTTCC<br/> TTGAAAACATTTAAAGATTAGTACTATATCTCCATGTTTTATTGTTAGTTTGGGTAAGAACTCTTTTCTCATATACATGCTTTCACC<br/> ATGTTTACAGTTAAAGAACGAGTAACAATAATTTGCTTGTTTTTGATAATTAACAAGTGTCTGCTAGCTAAGCTTTTATGCTCCAA<br/> TAGGATTTGGTTGTGAAAAAATAATCTCAAGGGCCACATGAAATCTAAGCCGCTCATGCTGCAAGCGCAGCCAAATCGTAGC<br/> CGTAGAAATGACGCGATGATGGGAATGACAAGGAAAGTGGAGTGTAGTCCCAAGTGTGGGAAAAACAGAACACAGCAACGCCAA<br/> ATGGTCAGCTTACGCGAGCTTAAACGCGAGCAATATCCTTAATTTCTGATCCATCGACACAGGACGCTCCGATTCTATTTCCAAA<br/> TCTCGACGGCCAGATTCAAATATTCGAGTGAATGATCTATCTCATCGCCATCGAGTGCACATAATACATCTTGTCCACAAGAACGC<br/> TAACTACTATTTGCTACACTATTCTTGTAGCCAGAGTGGGTTGGGAAATGATGAACCTCGATCGGTGCTTTTTTTTATATAATTAATTTT<br/> CAATCTTTTGTAGTAAATATGTAATAAACCACTAGATGATGCTTATTAATGCAAGTTTGGATTATGATAAAGAAAGACTAGTTGA<br/> TTACTTCTAATTTCTTATTGATTAATAAACAATAAATGGAAGTCTACGTTAGGGCTTGTGATGGATAAAGAAAACCTCATGGGAAA<br/> TGGCGGGGCTTTGGGAGAGAACAACCTTTTCTGACGTTTTTGGTGTCTTTTGTGACGCTCTCTTTGGTTAGGTTTTTTGATTA<br/> GAATTTTTTTTTTTTTTGTGCGCATGTTATATAAATAAATAAATAAATGGGAATTTCTTTCAAGCAAAATATTGAACGATGATAAA<br/> AATGTTACTATTGTTAGAATGTGGTATTGCTCTTCCGTCAGTGTATTAAATTTCCCTTGCACAACCTTTGCTGTATGAAAAACACT<br/> TTGACAACCAACATTTGATCTCTTATGGATTTTATTCATCAGTTAATTAATTAAGAAATTAATGAGAGTCACTAGCTAGTGAGA<br/> CTTTTGTCTTGAAGAAAAAGGTAATTTGTTGTTATTTCCGGTTAAAGTAAAGTACAATAATGAAAAACAAAAGATACGTAGAA<br/> CTGATATTTGCTAAACATAAAGAGCCAAACAACCACTTTGGCACAAGACAGGCGTATCCAAATATGTTGGAAAAAGTTATTACC<br/> CCTCGATTTGTTCAAAGTTTTTTTTTAAACATAATGCTCACAACCTTGTATTTTCTACATTTGTAAGGCTAATCGATCTTAACT<br/> CAACAATTTCTCGAATTAATTAGACATATAAAGTAAATGACATCAACAAAACAACCTCTATGATAATAGTAGTTAAAGAAAGTCAAC<br/> AAGTGAATTGAAAAAATAAATAACCACTCTCTGCTTCTTCTAATTAACAAAATAAATAAATAAATAAATAAATAAATAAATAAATAA<br/> AAAATTAATAAATAAATAAAGAAAGAAAGATTACGTAGGATAGCATTAACTTGTAAATTTGGGTTGCCCTATAAGACTGGTCAAC<br/> ACACCACAGCTCAAAACTTGTCTTGTCTTGTAGACTTAAACCAACACTCTCTCTCTCTCTCTCTCTCTCTCTCTCTCTCTCTCTCT<br/> CTCTCAAAATTTTGTCTTATTTATGCGATAAAGAACCAATTAATCTCTATCAAAATCTTTTTGGTTTTGTTGATTTTGTAAATTT<br/> TTTCAAGAAACACGAAAAGATCATCAAGAAAGAGAAGGAAA</p>                                               |







| Name           | Gene ID        | Promoter sequence                                                                                                                                                                                                                                                                                                                                                                                                                                                                                                                                                                                                                                                                                                                                                                                                                                                                                                                                                                                                                                                                                                                                                                                                                                                                                                                                                                                                                                                                                                                                                                                                                                                                                                                                                                                                                                                                                                                                                                                                                                                                                                                                                                                                                                                                                                                                                                                                                                                                                                                        |
|----------------|----------------|------------------------------------------------------------------------------------------------------------------------------------------------------------------------------------------------------------------------------------------------------------------------------------------------------------------------------------------------------------------------------------------------------------------------------------------------------------------------------------------------------------------------------------------------------------------------------------------------------------------------------------------------------------------------------------------------------------------------------------------------------------------------------------------------------------------------------------------------------------------------------------------------------------------------------------------------------------------------------------------------------------------------------------------------------------------------------------------------------------------------------------------------------------------------------------------------------------------------------------------------------------------------------------------------------------------------------------------------------------------------------------------------------------------------------------------------------------------------------------------------------------------------------------------------------------------------------------------------------------------------------------------------------------------------------------------------------------------------------------------------------------------------------------------------------------------------------------------------------------------------------------------------------------------------------------------------------------------------------------------------------------------------------------------------------------------------------------------------------------------------------------------------------------------------------------------------------------------------------------------------------------------------------------------------------------------------------------------------------------------------------------------------------------------------------------------------------------------------------------------------------------------------------------------|
| <i>CsDof94</i> | Csa17g073130.1 | <p>TCTTAGCTTAGCTACAAGTAAAAATACCTGGTATGGGTCAAATCTCAGTCTCAGATCTTGCGAGAAAAGTTGCCAACAAACAAG<br/> CTGCCATGAAAAACAACCAATGAGCTTAGAATTAAGGTAAGCTTAGCTAAAGAGATTCTCCCAAAGATTGTTATAGTTGACTAA<br/> CCTTAACCAAAGCTGTAGCAAGGTAACCAACAGCAGCTTTCACGGAGGTTCAAGTGTGCATATTAGACTCTGCAGATTCACAACCT<br/> TCCGATTACAACTATACCAAAATCCAAATTTGGGGATTCTCAACACCTAAGTCTGCGAAGCTCATACTAAGCCTTAAGATTCTAGA<br/> TCACGAAGTTTAGAAGTAAGCGATTAAGTATATGCGCAAGAGGATCTAGATAAAATCTTAGATTAGGCATGAATGAACCTAAGAGATA<br/> CTAAAAATTTGAAACCACAGATCGAGAAAAAAGAGGATTTGTTTCATACAAAGGAGTGGCGGAGTAGACGGCGTGAGGAC<br/> CGAATGTGAGAATCGCACAGTTGAAGAAAGTAAAAAGCGTCACTGCTCTCTCGCTGTGACACCAATCGGGAGCTACACAAGTCC<br/> GGCGACGCAAGACGACGACCACCACGCTGAAGCTGTGAATTGAAGAAGAAGAGGTTTAGTTAGCTGAGAAAAATCTGAAAATCT<br/> GATGGGATCAACAAAAGTCTTAATGGGTTCCGAATTTGGGTCTCTATTGGGCGTATAAATTTAGAAAGTCAATATATAATTTTTTT<br/> TTTTGCAACAGCTATAGTGAGCTCAAACTGCTATAGTGCTAATATAATGATTTTGTTTTTTAGCTGAAAAATATATGATGTTTATA<br/> AATTCGATTTGATTTCTTTGGGGTTTAAATCTCTTTGAATTTGTTTTCTCTGAATTAATTTTATACGAAAGCTTATGCATTTTCC<br/> CATATTTGATATATTCCTCTATTTTTTATTATAATATTTCTCACAATTTAACTATAGTTTGAGTATATAAAAAAATATCTTAGTCCA<br/> TGGTAGTATTGACTAGGTTATAAATCTTATAACGCCTAAACCCGTTTTAGGACCTGATTGGTGAAGGCTTTAAGACTTTAAAAATATT<br/> TAAAAGTCTTAAAAGCATTTTATTACCAATCAGATTTTATGACTTTTTTAAATTTTTAAGTTTCAACAGCCACTTTAATTTTTCTCTT<br/> TTTTTCTTTTCTTTTTTAAAGCTTAGAAATAACGCTTTTAAACCAAAAAAGTTAAAGGCTTTTTTTTACTCTCCATCATAATTG<br/> AAAACTTTTATAAATTTATATATTTTTGCAACAACCTTTTTTTATACATTAATATCAGCATTTTTTCTTTTATTGATATCCACT<br/> TCTCTTCAAAAATTTCAATTTTTATCATCACCTTTGATTTTTCTTATAAATTTGTTATTAATAAAAATACAGCCACAGCTTTAAAGTTT<br/> TCTTTTTAACAACTAGATTTTAAACAATAAAGTATTTACAGCCAAAGTCTATACAGCCAAATTTTAAAGCTTTTAAAGCTTTTAA<br/> AGTCTCTACAGCCACAATAAAGTCGTTACCAATCGGGGCTTAGATTGAATTTGAGGTTACAGAGGATTTGTTATGAAAGGAAAT<br/> GACCCAAAAACAATAAATTAATAAATTTGTTATGTTCTGATTTTTTCAATTTAACAATAAATAAATAAATAAATAAATAAATAAATA<br/> TTTTTCAATAAATTAATCTATCAACTAAAACCTCAAAAATTAAGTAAACAAATAAATAAATAAATAAATAAATAAATAAATAAATAA<br/> GAACCGAAAAAGCTTCTCTATATAAAACCACAACACTCTCACAACATCCCCTTCTCTTTCGCTCTCTCTCTCTCTCTCTCTCTCT<br/> TAATTAACCTTCTCTGCTGCTTCTCATAAACCTCAACTATA</p>                                                                                                                                                                                                                                                                                                                                                                                            |
| <i>CsDof95</i> | Csa17g090650.1 | <p>GAAAAAACAATGAAAAATCCGATTGGAAAGAAATCGTGATTTTAGTAAAAGCTAATCCCATATGACTTTTGGATGGATATAGTTTGA<br/> ATTTTATAAATCTTTTCTGGCTCTTTTGTGTAATCATGTTTTTATGATTCTTTTGTAAAACCTGTTTCCGATTTTCTGACTTATTA<br/> ATAATACATTTCAATTTACATGTACATGTTCTTCTGTTTAGTTATTGGCCATTTTCTCTTACTTTTATAAATTTATTGGCTTCA<br/> TGAAGGATATTTGTTTCAAAAACAAGGTAATTTAGATTTAACAGTAAGTGTGCTGCCTTGTATTGATCATCTACTGAATTTCTTA<br/> GGTAATTAGGACCTCCGATGTGCAAAACGAATTAACAAACGAATTAAGGTAATACCGGCTATTGTAAGAACTGCTCTTGTGGCT<br/> AAGACTTAAGAACTGAGCCATCCATTTGCTGCTAGAGAGCCACAATAAGTGGTAGCCCAAAAACAGTATGATACCGGAAG<br/> TCGGCAGCGTAAGCGGATCGTCAAACTGTTTTCGACACTTGTGTATGGTGTCTGTGGTTCAGTGTATTACAGATAGCATGGTACAAA<br/> AAAACTGACGGTGTGATTAATGTTCCATGTTGGGTTTCAAGTGAATGATGCCTTTTTTTTTTAAATATATTCTCTTTTATC<br/> GATCCAAGAAATAAAGACTTTGCTGCTAAGTACGCTATCTTTTACATGTTTTTTTGTGCTTCTTAACTCGAAGGCTTAGTGGGCTCA<br/> GAGAGCATCATAGCTCTGAGTTTGTGCGTGCCTAGTTGATTTTAAATTTGGGACAAATCAAAAAGTCTTAACTTATCTGTTTCTG<br/> TCAAAATCAAAAATTTTAAATCTTAAATAAATTAACGTTTAAACAAATCTATTTTAAATCAGATGAATAACGTTTGAACATAAC<br/> TCGAAATCACTAATTTAAAACTCAAAGCTCAAATTTGAGTCAAGATTTTCAATTAAGTTTCAAAAATCAATGGGTCAAAAATTTCA<br/> TATCTGGTGAACCTAATCTCGAAAGAGCAGTTCAAGATTTTCACTTAAATAAGTTTCAAAAATCAATGGGTCAAAAATTTCAATG<br/> GTTCAAAATCTATGGGTTAAAGCTAAAAGCATAAATGACAGTTCGATTCCTTCAACATATAGCATTTGAATAGCAGACCGAGCTC<br/> GACTATTAGTTATTACTAGTATAAGTTTATTTTCTGTTGACTATGAAATAAATGATAAAAAGTTAATAGTTAAGTCAACAGGTC<br/> TGTTAAAGTTCAACGCGTCAATCTTTGCAAAAGAACTATTGGAGGAAATTTCTAAGAAAGTTCCGCTTAGTTTTTATTTTATTTT<br/> TAAAGTCTATCCATAAATAGCATAACAAATATATAAGTTATATTGAAATTTTTTAAAGTCAATATTTTAAACATACTTAAATAT<br/> AAAAACAGAATTACTTAAGAGGACAAAAAAGTATTAATCAAGCTAACCATGACTTTGAAAAACATAGTAGAAAACCTAATAATCT<br/> TAGCAAGTTACAAAATAGAGAAAAACAAGGTCGGCTGCTGTCACAACAATGAAGCAAAAAAACAACAGAGGTCACACAA<br/> CAAGAAATAAATAAATAAATAAATAAATAAATAAATAAATAAATAAATAAATAAATAAATAAATAAATAAATAAATAAATAAATAA<br/> GGTGAAGAAGAAACTCTTAAACCCCAACCAAAAAGCTCCACTCATTATCTCTCTCTCTCTCTCTCTCTCTCTCTCTCTCTCTCT<br/> TTCTTCTCCCCCACTCCCAAAATAAAGAAATCCATTTTTTTTTGTTTTTAAAGGTTCTCTCTCTCTCTCTCTCTCTCTCTCTCTCT<br/> ACAAACATTTCTTGTATTGACTGAGAGAAGAAGATAAAAAAAG</p>                                                                                                                                                                                                                                                                                                                                                                                                                |
| <i>CsDof96</i> | Csa18g033540.1 | <p>NNNNNNNNNNNNNNNNNNNNNNNNNNNNNNNNNNNNNNNNNNNNNNNNNNNNNNNNNNNNNNNNNNNNNNNNNNNNNNNNNNNN<br/> NNNNNNNNNNNNNNNNNNNNNNNNNNNNNNNNNNNNNNNNNNNNNNNNNNNNNNNNNNNNNNNNNNNNNNNNNNNNNNNNNNNN<br/> NNNNNNNNNNNNNNNNNNNNNNNNNNNNNNNNNNNNNNNNNNNNNNNNNNNNNNNNNNNNNNNNNNNNNNNNNNNNNNNNNNNN<br/> NNNNNNNNNNNNNNNNNNNNNNNNNNNNNNNNNNNNNNNNNNNNNNNNNNNNNNNNNNNNNNNNNNNNNNNNNNNNNNNNNNNN<br/> NNNNNNNNNNNNNNNNNNNNNNNNNNNNNNNNNNNNNNNNNNNNNNNNNNNNNNNNNNNNNNNNNNNNNNNNNNNNNNNNNNNN<br/> NNNNNNNNNNNNNNNNNNNNNNNNNNNNNNNNNNNNNNNNNNNNNNNNNNNNNNNNNNNNNNNNNNNNNNNNNNNNNNNNNNNN<br/> NNNNNNNNNNNNNNNNNNNNNNNNNNNNNNNNNNNNNNNNNNNNNNNNNNNNNNNNNNNNNNNNNNNNNNNNNNNNNNNNNNNN<br/> NNNNNNNNNNNNNNNNNNNNNNNNNNNNNNNNNNNNNNNNNNNNNNNNNNNNNNNNNNNNNNNNNNNNNNNNNNNNNNNNNNNN<br/> NNNNNNNNNNNNNNNNNNNNNNNNNNNNNNNNNNNNNNNNNNNNNNNNNNNNNNNNNNNNNNNNNNNNNNNNNNNNNNNNNNNN<br/> NNNNNNNNNNNNNNNNNNNNNNNNNNNNNNNNNNNNNNNNNNNNNNNNNNNNNNNNNNNNNNNNNNNNNNNNNNNNNNNNNNNN<br/> GGCTGACACCTTTTTCGCCATGCTCAGCATCTCCACGCTCGATGCACCGCACTGTCTTCAAGGTTGTGCTGGCAAGAAACCTTGA<br/> CACTTTCCCGCTTCTGTTGAAGTCTTCAAGTACATTTTGGCATAGCTTGAACCTGACAGATCTCTGTTTCTTAAAGAGAGCCTC<br/> GGTGGTTGCGCGAAGAGAGAGACGGCTAGGGCGAAGTCAATTTTTGCTCAGCAAAAAAATAGTATGGATGGTTATACCGACAA<br/> TAGCTTTTATGCGTTTCAAAATCAATAAATTTCCATGCTAAGAAACCAACAATACTAATAAATTTGAGTATCTGTAATTTGTTTT<br/> GCTTTAAATATGGAATGAAATGACGATCGAAAATGAAAATCAGATATCTTTGTTGACGAACTACGAAGGTCACCTTTGAAACGGA<br/> AGGGTCCATTTAGGAAGAAACAAGACATTTGCGATGAGTACGGGACCGCGTGGTGACAACCTCAACGGACCATTTGGGACATAAAAA<br/> CAGAAATGACAACGAAGTTGAGTGGGGAATCCGACGCTGAATTTCAACCATCTCTTCTTATCCATCATCGTACGGTACTATTC<br/> ATCTTGAATCAAAATAGATCCGATTTCAATTTGATAACGACGACTGCAACTATTCATTTATATAAAGTTGACAGCTTAAACGGATA<br/> CATTATCGGTGGAGTGGCTAAACGAGCTTAGTGATTTTTCGGACTATAGTTATAGACTTTAGGCTACAAGAGTTTGTGTTTACTCT<br/> CCAAGTTTTTCTGTTGTTGACAAATTAATTAACCTCAATATAAATAAATAAATAAATAAATAAATAAATAAATAAATAAATAAATA<br/> TATACAGTCAAAATATACAAATGTTAGATTTTGGTAAATATGTTTAAATATGATTAGTATTTTTATCAAAAACCTCAAAAACAT<br/> TAGTATTTTCGACCAATAAAAAATAACTTTTTTTTTTGAAGTACTCTCAACAAGTCTTGAAGAGAGATCGTAACACACTATCATC<br/> AGTTTATGFACTTTCCCAATACCTTTTCAAACTACTAATATGATAGAGAAAAATTTAATAATATGCGTACTGATGAAATTTGTT<br/> CACATTAATAAATAAATAAATAAATAAATAAATAAATAAATAAATAAATAAATAAATAAATAAATAAATAAATAAATAAATAAATA<br/> CCATTTGTTTTTAAAAATAAATAAATAAATAAATAAATAAATAAATAAATAAATAAATAAATAAATAAATAAATAAATAAATAAATA<br/> ATTCCATGATATATACAGATGCTGGCTTTTCTTTTCTTTTCTTTTCTTTTCTTTTCTTTTCTTTTCTTTTCTTTTCTTTTCTTT<br/> AAACATCTCAATCTCCCAACACATAAACACTACTAACACTCATTACTTCAAGCAGCTTCTCAGATTCATCAGCTCTT</p> |
