# Supplementary material for: Genome-wide identification and functional analysis of Dof transcription factor family in Camelina sativa
Source: PubMed Central journal article supplement (PMC9730592; doi:10.1186/s12864-022-09056-9), 2022-12-08
Supplement: 12864_2022_9056_MOESM12_ESM.pdf [file 12864_2022_9056_MOESM12_ESM.pdf]

**Table S10. The 2000 bp promoter region upstream of the *CsDof`s* target genes.**

| Name         | Gene ID        | Promoter sequence                                                                                                                                                                                                                                                                                                                                                                                                                                                                                                                                                                                                                                                                                                                                                                                                                                                                                                                                                                                                                                                                                                                                                                                                                                                                                                                                                                                                                                                                                                                                                                                                                                                                                                                                                                                                                                                                                                                                                                                                                                                                                                                                     |
|--------------|----------------|-------------------------------------------------------------------------------------------------------------------------------------------------------------------------------------------------------------------------------------------------------------------------------------------------------------------------------------------------------------------------------------------------------------------------------------------------------------------------------------------------------------------------------------------------------------------------------------------------------------------------------------------------------------------------------------------------------------------------------------------------------------------------------------------------------------------------------------------------------------------------------------------------------------------------------------------------------------------------------------------------------------------------------------------------------------------------------------------------------------------------------------------------------------------------------------------------------------------------------------------------------------------------------------------------------------------------------------------------------------------------------------------------------------------------------------------------------------------------------------------------------------------------------------------------------------------------------------------------------------------------------------------------------------------------------------------------------------------------------------------------------------------------------------------------------------------------------------------------------------------------------------------------------------------------------------------------------------------------------------------------------------------------------------------------------------------------------------------------------------------------------------------------------|
| <i>ROD1</i>  | Csa01g018440.1 | ATTACAGGGCGTAGTTCCTAGTTATCCTAACCTTGTAAAGATGTTTAACTACTATAATCTTACGTACATGTAGTGAG<br>ATTTTCATGTTAAATTAATAAAGTAAGAAAAAGGAAAAATTGAAAATTGGTTGGCTGAGGATATTTGTGAATTAAC<br>ATATATATCACATCGTAAGATCTATTTTGACGTGCGAGTTTATTAAGATTAGGAAAAAGTGAAATCATCAAAACAA<br>TTGTCCCAAATCTTTAGCCTCCTCCACCGGTAGACAAACACGCTCTAATTTGGGTGAAGATTAGACATACACGCTCA<br>TAGCTGAAAAACAACAATCACCACCTCTTGATTTACATTTACACCCGTTGTAATTAATATGTATATGGC<br>TATGTAAAACTTACAAAATCCTTTGGCAGAACTACAATTCAGATTTTCCTATAATCTTCAAACGCTATGTAATTTACA<br>GAACAAACGATAATATATGGTTGTTAACATATTGAAAACATACAATACAACAATCAAACGAAAATACGATCGATAAGC<br>TTAACTACACTGAATACATGGCCAATAATTAACATACTACTTCCTCGTCTTGGTATCCAGACCGAGTTCAATCAAC<br>CGCGGGACTCACAACTCGAGAACTCATGATTGACACACTGAGAATATCCACGTTGGGTGTGGATATAATTAAGA<br>GAGTTTTATTTGCTGAAACAACTCAGTCAGTCACCATTGAGTAGATATCTACCTCCTCAGGAAATGTGTTTTTT<br>TTTTAGATACAAAATTATGATAGAATATAGAATGGTCAATTATTTGTTAGACTCTTAAACAAAAATTTACTTTTCGTG<br>AAGGATCATAAAATTGTAACACATGAATTACGGTCAAGTACTATAGACAAAAATCAGGTACAACTAAATATAACACG<br>ATGCTTTGGGTTATAGTATAAATAACACTTCACATACAAAAATAACAAATCGTGTAAACAAAATATAATCCAAAAA<br>ATCAGAAATCAAACCGGTATGAGTGAACAATGTCATAATTCCAACGAAAGAAATTAATTTGTTGTTTCATTCC<br>ATATTTCTGGTAAATGATTCATCAGTTGTTTCTTCCGTGTGTTGTTGTTGTTGTTGTTGTTGTTGTTGTTGTTGTTG<br>CATGTTTGGAGCAGAGATAGTGTGTTTTTACTCCAAACATATGAGAAAGTCTCCAATATAGTACAGTAAC<br>AATTTAGCATCAGGAGATTAGCAGCCCTTCAATAATAAATAATTTACCAGATTTGTGAACATGTAAGTATGGGT<br>CTTAATAAAAATATATTTTCGAATGTTATGTTAGTAGTATCATAAGCAATAAACAATGTTGCGGCAAGTCAACAA<br>TGATCTAATCTAAGTCTCATACTCATGTGTTTTCTCTTCTAACCATACGTGACACATGGATAATATAGCTAAAA<br>CTAATAACAACATGTAACCACTGTCATTTATGTTTTCAATGATATGGAGATTTAGGATGTTAAGAAATTAAGAGTA<br>ATCCAATAGCCAAATAAGTGTATCAAAAAGTGTGAAGAAAGATATTTGCGCGAAATGAGAACCAATGCAACAA<br>TAGTTTTTATATTAACGAAAAAGCACAATCTTGTATATTTCCCAATCTTGAATTAGGATGTTAATACATTGC<br>ATACCAATAATGCATTTTATGTGATAAATATAGTTTCTATAGGTTTTGGGGAATCTCATATCTCTCTCTCTCTCT<br>TGTCGCGAAATGTTATTACTTATAAACAATAAACAATAGTATAAAGAACAACATGTCGGTGCAGTCAACAAAA<br>GTAAAGCCCAAAAGATTAGAGTGTATTAACATAACCAATAAAATTAAGTTCGTTCTCAAATCACTTTCAT                                                                                                          |
| <i>FAD3</i>  | Csa05g033930.1 | AAGAGTTATGATTGTACCAGAATAATAACGGGACTCAGATATTTCTATAAATAATTAACAAGAAACACATAATATAT<br>AGTCAGTCTATCACTAACCGGCGGCCTTAAAGTAATACCACAAGAGTTATAGGTTGAGGTTGAGCCTTGGCTATGA<br>TATGACTGACTAAAGTCTTCTCATGTTCTCGATTAATAAAGCTGTACGTTTAGGTTGCAAACTCCAGTCATACAGA<br>AGGTCGATATTGTCATGTAATGTTTTTTTCCAAATAAAGAAAAGTTGTTGCAAGTAATTAATGTCATATATAGTAA<br>GTTGTAGTCAAAAATATGTATAAATAAATTAAGGCCGTAATCGTAAATGTGTGCTTGAAGAAACAGTTAAGAGAAA<br>AGGTAAGAGGTTGCTGTACAAAATCAATGTCTCTCCTCACTAACCATTTTTTGGTGAAGTTGTTGTTGTTGTTGTTG<br>AAATGTAATGATTCAAGCTTTGAATTATGAGGACGAAAGGAAATGATAACAGTGTATTTGTTATGAAAACAAATC<br>TATTTTTATTTTTCTGGTCTCTTTTTCGTTTTTAATAAATCCATGGGCTGATCCATGTTAGAAACACACCGCAAT<br>ACGTTGAGGTTCTTTCAGAAGAGTCCGAACTGTATATTTGAGTTTGAAGATGTTTCCGACTAATGCCAGGATGTA<br>CCATATAATTTGGTTTATCTATCCAAAATATTTTTAAGTCTTTAATAAAAAATTTTCAATTTTCTAATCTCTTAT<br>CATAAATAAATCTTTTTAGTTTTCCAAAAAAAATATCAGAAAATATTTATACTATTTCTAGGCATTAACATTTTTA<br>TTTTATCTGTTTATAAATAGAGATAAAAACATATATTTAAATTTAGAATATATAAGAGTAATATGTTTTTTTTTT<br>TTGAAAAGAGAGTACATTATGTTTTGCAACGTAACCTTGACCACCATGTGTGTAAGCTTAAAAATCTATCTCATGA<br>AACATAGGAAAATGTTGTGATATCTCATGAAAGATGAAACCTAGGAAAATCTATCTTCACTGACTACACAATTTG<br>AGTTGTTGTTTTAATCCGCATCAAGTCTCGCTCAAAAATAAATAGGACGATCATGTGTTGTTGTTGTTGTTGTTG<br>TGATGAACCAAAAAAAAATAATCCACCCTTAAATGTAATAAATCGGAAACGGAATAAATCGGTTGTTGAACTAT<br>TGAAGTGATTTAAACTAATGGAAAGTGAACACAGCTACAGACCTCTTATTTTTTGGTCAAAATAAATCAATGTA<br>GTGCAATTACATTTAATTAATTCCTCGAAATTAATCAACGACTTAAATTTCACTACTATGTAATGTTGTTGTTG<br>TTAAGATATTTTCTTTTTTTTTAACTATTGTTGTCATTACATACAGCATATAGTGTTTTTTTTTTTTTTTTTG<br>TTATAAATAGTTTTCTCTATATAGTGTTCAGTATAAGAAATATTAATCTCGTTGCTGTGTCAGTTTCCGGTGC<br>ATGGTCAAGAAATGAATAATAATTTACTTGGTATACTTTGGTACGTGCAAGGAAATAATTCACCTCTTCAGAA<br>CACTTATACAAAAGAAATAAATCATGAGAAATATATTTTTCAAACCTACACGAAATTTGAAAGAAATGTAAGTT<br>CTTGTTAAAAAACCAAAAACAGCAAAATACCCTTTTTATCTTTTAAATAAATAAATAAATAAATAAATAAATAA<br>ATGGAGTTATTTCTCATTTTTCTCTCTTATATAAACAATAACACAAAACCAAACTCAACCAACCTTTCTCT<br>CTCACACATTTTTTTCTTCTTCACTGAGAGCCATTTCTCTTCTCTCTTCTCTCTTCTCTTCTCTCTCTCTCT                                                                                                           |
| <i>LACS3</i> | Csa16g057140.1 | CTTCTATTTTCAGCAATAATAGACCTATTGGCAACCCTTTGCATTGCATCCCTCTTATAAGTTTCAACATTTGGCA<br>GCTTCCTCTTGCAATCTTTAAGGTTCTATTGTATGACTCAGTGTGATTTGTTGTGATCAGCACAAACAACCAAC<br>CTGAAAAACGCCCTACACCATGAACCTTTGGATCCTTTCGATGAGTCTTACAAGCCTGGGATCAAAATCTTTGA<br>GTCATAATTTCTTTATAATCCCGCTTGTGTAATGCTTGCATTCGNNNNNNNNNNNNNNNNNNNNNNNNNN<br>NNNNNNNNNNNNNNNNNNNNNNNNNNNNNNNNNNNNNNNNNNNNNNNNNNNNNNNNNNNNNNNNNNNN<br>NNNNNNNNNNNNNNNNNNNNNNNNNNNNNNNNNNNNNNNNNNNNNNNNNNNNNNNNNNNNNNNNNN<br>NNNNNNNNNNNNNNNNNNNNNNNNNNNNNNNNNNNNNNNNNNNNNNNNNNNNNNNNNNNNNNNN<br>NNNNNNNNNNNNNNNNNNNNNNNNNNNNNNNNNNNNNNNNNNNNNNNNNNNNNNNNNNNNNNNN<br>NNNNNNNNNNNNNNNNNNNNNNNNNNNNNNNNNNNNNNNNNNNNNNNNNNNNNNNNNNNNNNNN<br>NNNNNNNNNNNNNNNNNNNNNNNNNNNNNNNNNNNNNNNNNNNNNNNNNNNNNNNNNNNNNNNN<br>NNNNNNNNNNNNNNNNNNNNNNNNNNNNNNNNNNNNNNNNNNNNNNNNNNNNNNNNNNNNNNNN<br>NNNNNNNNNNNNNNNNNNNNNNNNNNNNNNNNNNNNNNNNNNNNNNNNNNNNNNNNNNNNNNNN<br>NNNNNNNNNNNNNNNNNNNNNNNNNNNNNNNNNNNNNNNNNNNNNNNNNNNNNNNNNNNNNNNN<br>NNNNNNNNNNNNNNNNNNNNNNNNNNNNNNNNNNNNNNNNNNNNNNNNNNNNNNNNNNNNNNNN<br>NNNNNNNNNNNNNNNNNNNNNTAAGGCTACACAACAAGACTAGACAATAAACTAAGTAAATATAAAGAA<br>ATCTTGCCGACAACTCACTTTCCTCACTTTTAAAAACGCAAAATAAAGTTAAAAATCAACAGCAAAATGCCAG<br>CTTTACCTATTGGGACGAGATAAAGGCAAGTCTCTTATTCCGATTCCAGCAAGATTTCACTGCATTATCT<br>GTTAAAAACCTAATTGAAAAGATGCTCTCAGTTCCTCGATATCTTCGATAAAACGATAAATACTTTTCA<br>TTTCACTTTCTGTTTGGATCGATGAATAATAGAAAATGGGCCGTGTTTTTTTTTAAATTTAGATAA<br>ATTGGGTCGGGTCGGGTATTTATTTGTTGTCAGGTGCTCGGGTCCGGTTTTAAATTTGTTTCTGATG<br>AGTCAACGCGGTCGTTGCGGGGAAATGACCCGTTGATCGAGATTTATGTCATGGTGTAAACACATGACGTC<br>AGTACTTGGTGCATGTTGCCATGCCAACATATAATGATGATGTTGAGCATACATTAATTTGAAATGTTGTG<br>TGATTTGCGTACATCTGTTAGCTGGACATCTTTTCTCTTTTCTTATATATAGTACTTAATTAAGACTCT<br>ATTATCGTAAATATGAGTAAATGACACATTAAGTACTAGATCCAGTATATAGGAAAGTCCCACTTTTT<br>TTTTAATCAATTAATTTTCTTGTATTTTTTTTTGCTAAAATCAAAATGTTATAAGGACTTATTATTTCT<br>TTAATTGATTAATAATAAATAGATAAACTAATAATAATACTATGAGCTTTTATGAGGGGAAAGTAAACA<br>ATAAATACTTATAAATACTATCAACCAATATGGAGGAGTCAACCACTCGTGTCTATCAATCAATTTTGGTT<br>CTTTACAACATTCACACCATTTAAAAATTTGTTCTCTAGTGTGTCACCTTACAAATCAACACGACGATCAAA<br>ACATAAATAACACAGATAAATAAGGACAATAAAGCAAAAAGAA |

| Name     | Gene ID        | Promoter sequence                                                                                                                                                                                                                                                                                                                                                                                                                                                                                                                                                                                                                                                                                                                                                                                                                                                                                                                                                                                                                                                                                                                                                                                                                                                                                                                                                                                                                                                                                                                                                                                                                                                                                                                                                                                                                                                                                                                                                                                                                                                                                                                                                             |
|----------|----------------|-------------------------------------------------------------------------------------------------------------------------------------------------------------------------------------------------------------------------------------------------------------------------------------------------------------------------------------------------------------------------------------------------------------------------------------------------------------------------------------------------------------------------------------------------------------------------------------------------------------------------------------------------------------------------------------------------------------------------------------------------------------------------------------------------------------------------------------------------------------------------------------------------------------------------------------------------------------------------------------------------------------------------------------------------------------------------------------------------------------------------------------------------------------------------------------------------------------------------------------------------------------------------------------------------------------------------------------------------------------------------------------------------------------------------------------------------------------------------------------------------------------------------------------------------------------------------------------------------------------------------------------------------------------------------------------------------------------------------------------------------------------------------------------------------------------------------------------------------------------------------------------------------------------------------------------------------------------------------------------------------------------------------------------------------------------------------------------------------------------------------------------------------------------------------------|
| SAD6     | Csa17g070600.1 | <p>TGTTGAATGTCATTGTTAAGGCTAAGAAATAAGCTCTTTTATTGATGTTTCAGTAATTATCTCTTCGCTCACTGGTTACA<br/> AGTATATCTATTGTCTACTCTACAGGAGTATTGCATGCTTGTAGAGGATCCGATGTTGTGGAAAGCTACCAAGACAGTTG<br/> AACTTGTGATCCCTAGGGTTGGCAATGTTTTTGACATGGTTTTTGATTCTAAAACATATCAGTCTGCTATGAAATGGG<br/> TTGCAAAATTTCACTACACATGTTACGTTCTTTCTCTGAGGATTTGTGATTAATAATTTGGTTCACATTTATTGAT<br/> GGCTGTCTTGCTTTTATTATGGTTGGCAATGTGCATTTCCCGGTTAATTTCTTTTCTCTGATGTTTCCGACGAT<br/> ACTAAACAAGAATTTAGAATTTGTGATTTCCCGAGTATAATACATGATTTTGCAGAAC TAGATAATGATAATTTGGTTTT<br/> CGATGGCATAAATCTGTCAATCTAATTTGCTTTCTGTCTGTACTTGACCATAGGGGTGGAGTCTGATGCTACAAT<br/> CCCAATCCAGATGCCGGCCATGTAAGATCAAGAACAAAGTCAACCTGGGAAC TTGATATCAAACTAAAAGTTTGTAA<br/> AACTATCTTTATTTTCATCAAAGTTTGTCTGTATACATTTCTGAGATGTGCTTAGAGAAAGTTGGAATCGAACCCACTT<br/> GACTTGTATCAATTCAGCTTAAGAGATAGACAATCGATGCAAGCATCAAAGTCATGTTATAAATATATATGAACTTTGA<br/> ATGATTCATTCAATCAAAATAAATTTACACCGTTGTCACAGATTTACACCGTTGTTCCACATACCAACAAGTTCCGACGATA<br/> TCAAGATTTATTTACCCTGTAATAGATTGTTATGCTTCTAAGCTTCATAGTAGTCTTATATGTTATCATCGCTCTTG<br/> CCCAGGTAGGGTCTACTACATGTGGCATTTCCTTAAATTAATTAATACCCAAGCTTACAACCAATAAAGGCCTATG<br/> AAAAGTCTAAGAAAAAAGGATGAATTTCAAGTCGAAAATTTGTTCTCTTTGCTGATTTTCTCTGATGTTTCCGACGATG<br/> ACAGGATGTTCCGAGAAGAATTAATAAATAGCTAAGAATTTATTAATCTTTATAATGATAAATATGTTAATTAAT<br/> CAGTTATTACAATATTATTAATTAATACTAAACCAAAAAATAAAAAATAAATAAAGTAAATTTGTGACGGAACTTAGTTG<br/> ATTGCAATGATATTTGGTTTTCTTGATGTGTCAGACTTAAAACATTTCTTGAATAATAAAAAATAAACTTTGTTATTTTC<br/> TTAAAAGTAAAATAAATTTTACTAAAAAAGACAAAAGAAATAAATTTTCATGATCTTGTGTTTTTGCTAAAGAAATGTC<br/> TTCAAGTGGTTACCTTATAAATATTAATAATGATAAAGTATACAATAAAATTTGAGCAAAAATCAGAATACTAATATTAC<br/> AAGAATTTAATGCTCAATTTTATTTTAACTATAAATAAATTTAATAAATAAATAAATAAATAAATAAATAAATAAATA<br/> ACAAATTAAGAAAAAATTACAACAACATAAAAAACACAACAAATAGTAATAAAAAAAGAAAAATCCTAGTATTACC<br/> TAAAAATGAAGTTTAAACGATTTTAAAGAAAAAATGAAGAAAAAAGAAAGTTACTCTCAGTTAAGACTTAAATGGG<br/> ACAAAATAGAAAAATATAACAACAACCAATAGAAAACCAACAGTTAGCATGAGCACCCTTTGTTTCCACCCGCGT<br/> TTGTCTAACAATACTCTGCCAACCAATTAATTAATTAATTAATTAATTAATTAATTAATTAATTAATTAATTAATTAAT<br/> ACAGTAGTCGTCATCTCGCAAAACAAAATACTCCAACCAAGTTTAGAAGTCTGTCTCTTTACCATACAAA</p> |
| CsPDI1-A | Csa13g016300.1 | <p>TCGTGTTTTCTGCGGAGGAAAGATGTTGGTACTGTTAGAGAGCGAAGAGAGATGCTCTGCTTAGAAGTGGATAGA<br/> GTGAATGGAGAATACACAAGCGAAGCCATTTTTTGGCTGCCGATTTCCAAGAGTTGTAATCAAGAGAAGAGGATA<br/> AGAGAAGAGATTGAGAATTGAGAATTGAGAGAAAGAGATCTCTATCTGTTTGTAGTCTGGTGTGTCTTACACTTTGTG<br/> TTCTTCTGCTCCAAAAGCAACGCTTCGGAAGAAGGAAC TAAAAAGCAGCGTTGGTTTTGAAGTAAGTGGTGGAGGG<br/> AAGGACACGTGGACACAAGAGGGGTTCTACTTGTAAAGTCCGAGTTGGTGGATGATATCCGCTTAGGACACAATG<br/> AGATGGACTTTACTGCCTCTGATTTGGCTCAATTAAGATTTCTATTCATATTTTCAATGTTTGGGAGTGTAGTAGATAT<br/> TGGAGTGTTTTATATCTTTGTTTTTATGTTGATAAAGTTTATGTTGCTGTCTCGAGATGCTCTGCTGCTTTCCGCC<br/> TGTAAGAGATTTTTTCCGATGACGACTTTTTTATTTAGGCATACTAATTTGGGTAGCCGGTCCAATCCGGCCAGC<br/> ACAAAATATGATAGTTTTTGGTTTACCTTGGTCCAGTCTACTATTTGTCCTAGTAATTTTTTTTGTATTTCAGG<br/> AAAAAACACATATAGAGACCAATAAATAATGCAGAAAAATAAATAAATAAATAAATAAATAAATAAATAAATAAATA<br/> AAATCAAAATTTTAGTTGTAATAATCTAGAATGTCATTTAGTGCATTTAAATTTTATCATCATCATCAAAAGTTTGT<br/> AAGATGGAAGTGAATCTTATCAATTTACCATAATAGAAGATTTAACTGAAAGTATATATTAAGATTATAAGTAAAGT<br/> GTAGATGGGCATGTAGCATTGCAGTTTGAACCTAGATAGTCTGTTGCATCACGTTTGCATCTTATCTTTATCTTACA<br/> ATCCATTTCCCCCCCCCCCCCCCCNTCTTTATGAACCTAAGTCTAGGGTTGAAATTTACATTAACATTTCTTAA<br/> GTTGACTATAAGAGCTACTAAGAGTTGAGATTACTCAAACTATAAACTCTTTGATTCAGGATTTGGTTTGCAGGAAGT<br/> AGATATGATCTTTTGTCCCTCAAGATAAAGAGTTCTCTTAGGCGTTTCAAGTTTCTCTGCTGCTTCCGCTTTCCCTC<br/> TTTTTTCTTCTAGTTCAATTTTTTGTCAATTAACATGAGTTCTAAGTTGATATCATAAAGGGGTAGAAAAGCGTAGAT<br/> AAATTAAGTTCTTGTACTAGGCTCATCAACTAATTAACCAACACCAATTTGGTATATACGATCATTAACATGATG<br/> TTGCAATAAATTTTTGGTGCAGTTTGTAGTATTTTGTAGTGTCCAACTAGGCTGGTTCCGATACCAATACCAACG<br/> TCACAAGCACACACAAAAAAGGTCAACCTTGTGAGTGTGGGTAACTGATGGGCTTGTGGAGTGTGGACTTGTGT<br/> CAAGTGTCTAACAATAAATATGGTCCAATACTTAAATTTGATTATAACCGAAGCGGCGTGTAAAATAGGTGATTA<br/> AAAAAATGTTACGGACTAACTAAACAATGAATCAACGAAACGGATCGGACGGTCTTAGGTTGATTTAGGTTGACCG<br/> CAACCAGGAGCAAGTGGTCAAGTTTTTCCCATAACGGATACGGTCCGAGTCCCTTGGAAATTTGAAATATCAGAACGAA<br/> TAAAAAATAAATAAATAAATAAAGTCAACAAAAAATAAATAAATTTGATTTTGTAGTTGATCAGAAATTCGACGG<br/> AAGGAGAGCTCTTTGTCTAATCTGGTCTTCCAAGAGATTGACAAAAGTCCATAGCTTCGTTAAGTGGACAAGTTCAC<br/> AGGGG</p>                           |
| CsPDI1-C | Csa20g019000.1 | <p>TAGATAGATTTTTCTACAGAGTTGAACCAAGAGAAGAGATTGAGAATTGAGAGAATTGAGAGAAGAGATCTCTAT<br/> CTCTCTGGTTTAGTTGGTTTGTGCTTACACACTTTGAGTTCTTCTGTTCCAAAAGCAACGCTTCGGAAGAAGGGAAC<br/> TAAAAAGCAGCGATGGTTTTGAAGGTAAGTGGTGGGAGGGAAGGACACGTTGGACACAAGAGGGGGACTCTACTTTGG<br/> AGGTCGAGTTTGGTTGGATGATATCCGCTTAGGACACAATGAGATGGACTTTGCTGCTTGTGATTTGGCTTATGAT<br/> TTCTATTCATATTTCAATGTTTTAGGAGTGTAGTAGAGATATTGGAGTGATTTATATCTTTGTTTTTATGTTGATAAGT<br/> TTTATGTTGCTGTCTCGAGATGATCGTGTCTGCGGTTTCCAGCATGTAAGAGATTTTTTCCCTATGACGATACTTTTTT<br/> TTTTATAGGCATACTAATTTGGGTAGCCGTTCCAATCCGGCCCGCACAAAATATGATAGTTTTTGGTTTTAGCTTGG<br/> TCCACTCTACTATTTGCCACTAGTAATTTTTTTTTTTTATTGTATTGAAAAAACAACATAACAAGACCAACTAATA<br/> AATGCGGAAAAACAATAAATACTATAAGACTATAAGAAATATATTTAAAAATCAAAATTTTAGTTGAAAAATTTCTA<br/> GAAATGCATTGATGCAATTAATTTTCACTCATCATCATCATCATCATCACTCAAGTGTGTTCAAAAAGATGGAAGTGA<br/> TCTTATCAATTTACCATATCGAAGATTTAGTTTTCTTTTGAACCATATAGAAAAATTTATCGAAAGTATATATTA<br/> TTAGATTTTAAAGATTAAAGTAAATGATAGTGGCCATGTAGCATTGCAAGTTTGTACTAGATAGCTGTGTCATCACAT<br/> GAACATCTTTTCTACTCTGGTTCAATTTCTTATGAATCTTAAAGCTTAAAGTTTCAATTTTACACGACATAACATATCT<br/> AGTTGAATAGTAGCTAGGTGAAGATAAACGAATGACAATTTCTTTAATTCACGATTTAATTTGACGATAATGAAATAT<br/> GAATTTTTTCTTCAAGTTGAGTTTCTCTTAAAGGTTTTCATGTTTCTTCCCTGTCTTTCCCTTAAATCTTTATTTT<br/> AATTTTCACTCAAAAATGAGTTCTAGTTTCCATATTAATTAATAAGGGTGAAGAAGTTTAGTTTGGTTTGGTCTTG<br/> TAGTAGGCTCATCAACCTAATTTATCCAAAGGTAGGATAGCAAAAATCTTCTTGGCAATTCGAACCAACACCGTTGGT<br/> GATAAATGATGTTTGGTGCATAGGCTTTTGGTGCAGTTTGTAGTATTAATAAGTGTCCAACTAGTCTGGTTCGA<br/> ATAAGCCACCATCTGATCCACAGTTAACAAGCACACAAAAAAGTTCAACCTTCAACCTTCAAGGTTGTTCAAAAAGT<br/> ATGGGCTTGTGGACTTGTGTCATGTTTCTAAACATAAATTAAGGTCAAAATACTTAAACTGATTATTATAGTTGTA<br/> AAAATACAATTAACCGAAGCGGCGTGTAAATAGGTGATTAAAAAATTTGTTACGGACTAACTAACTAAACAAACG<br/> AAATCAACGAAACGGATCGGACGGTCTTAGGTTGACCTTGAACCGCAACCAAGTGAAGTTGTTGTTGTTGTTGTTG<br/> ATACGGATACGGTCCGAGTCCCTTGGAAATTTGAAATATCAGAACGAATAGAAAAAATAAAGTCAAGAAAGTCAAC<br/> AAAAAATAAATAAATAAATAAATTTGATTTTGTAGTTGATCAGAAATTCGACGGAGCTCTTTGTCTCTC<br/> TCGATTGATCAAAAAATATCCCTAATCTCGGTTCTGTTCAAGAGATTGACAAAAGTCCATAGCTTCGTTAAGTGA<br/> GGG</p>                        |

| Name             | Gene ID        | Promoter sequence                                                                                                                                                                                                                                                                                                                                                                                                                                                                                                                                                                                                                                                                                                                                                                                                                                                                                                                                                                                                                                                                                                                                                                                                                                                                                                                                                                                                                                                                                                                                                                                                                                                                                                                                                                                                                                                                                                                                                                                                                                                                                                                                                                               |
|------------------|----------------|-------------------------------------------------------------------------------------------------------------------------------------------------------------------------------------------------------------------------------------------------------------------------------------------------------------------------------------------------------------------------------------------------------------------------------------------------------------------------------------------------------------------------------------------------------------------------------------------------------------------------------------------------------------------------------------------------------------------------------------------------------------------------------------------------------------------------------------------------------------------------------------------------------------------------------------------------------------------------------------------------------------------------------------------------------------------------------------------------------------------------------------------------------------------------------------------------------------------------------------------------------------------------------------------------------------------------------------------------------------------------------------------------------------------------------------------------------------------------------------------------------------------------------------------------------------------------------------------------------------------------------------------------------------------------------------------------------------------------------------------------------------------------------------------------------------------------------------------------------------------------------------------------------------------------------------------------------------------------------------------------------------------------------------------------------------------------------------------------------------------------------------------------------------------------------------------------|
| <i>CsDGATI-C</i> | Csa15g084220.1 | <p>ATCTTATAGTTTACATTAGCGCATCTAGCTAGCGAGTAGTACTTGGTAAGTTTTTAATAACGACCTCTATGACTTGGCCT<br/> TGGCCTAGGAGCTTGGTTTACAGTTTACATCATGTATCGGGCTATCAGCTGACTCGACTAAATGGTTGGTGGAAACGGAA<br/> TACTATTTTTATAAGCTTGAAGTTATTAATAAGTCTATAGTTATCATTAAAAATAAAATATCACGAGTAAAAATTTTTCT<br/> GTTTTAAATATAGTTTCTTTTGGTTTATGGAACATAATTTCTTTATTTATGTTTATTTTTGGTATTTGAACTCTTTCTT<br/> TAAAAATAGACACATCAACTTGGTGTCTTATTATCAGAAAAACAGCATTCTTCTTTTCTTTAAAAATTATTATTACAAGAA<br/> AATTTTGCCTTGTCTATAACTTACAGTAAATCCCGAGTTTATGGAGGGACCCGAGACTAATCCCTTAAGGAGGTGC<br/> AGTTCATGGATGGACCTCTTTCCGGGTATTCAAATGGGCCGTAAGCAAGGACCCATATCCATATTGTCACATAGTAAAT<br/> GAGTAGCAATTCCAAATCTGGGGAGAGGTCCGAGACTAATCCCTGAGAGAAAGTGCAGCCACGGATAGACCTTCTCTCC<br/> GGTATTCAAATGGGCCGTAAGCAAAGGCCTATATCCATGTTGCCACATAGTAAATGAGTAGCAATTCCAAATCTGGAG<br/> AGAATTGATCCTGGCCTGGACCAACAAGACAACCTTCCAACAGATGGGAACCACTAGCCCACCACCATGTGGTTAAA<br/> AAATCTTGCTTTGAAAAATGCATTCAATCTTTATCATTTTCAGATGATTAATATTTTTATAATTATTTAATTGATAAGA<br/> CCTAATCTATAGTTTAAATCCAGGAGGATCGGTTACAGAAGTAGTATTTAAACCATTGACTACGAATACTTCCTATACGA<br/> TTATCTTTTTACAATAATAAAGAAAAATAAACCATTAATAACATTTGGATTAAAGGAGTATTAGCAAAAAATACTATCTATTG<br/> CAAAAAATAGAAAAACAAAAATAGAAAAATATTATTTTCTCAAACAGGATTTAAACGGTATTCAAACATTAATAATAAT<br/> TTCTAATTTCAACATATTTAATATTATTTAAACCAAAATCATAAACTAGAAAAACATAGGAAAAAACACTTCTGCAA<br/> CCACTTGACTACAAAACACTTTCCATATAATTATCTTTTACTATAATAGAAAAATAACAAATCCATTAATAACATTGGAT<br/> TAAGAAACATTTGAAAAATACATTTTACAAAAATACTATCTATCGCAAAAAATAGAAAAACAAATAGAAAAATTTT<br/> ATTTTCTCAAATCAGATTTAAACAGTATTTCAAAAAATTAATAAATTTCTAATTTCAACATATTTAATATTATTTAAA<br/> CACCAATCATTAAATAGAAAAACATAGGAAAAATTTTTATGTTTTTAAAAAAGTTGGGGTACATATTTTCGTGGCGAT<br/> GTTATGAATTTCTCACCCGAGGATCTTATTATGCAAAAAATTAAGAAAAAGAAAAAGAAAAAGAAATAAAACCATAGAAA<br/> AATATACTCGCAAAACAAAAATATCGCAAAACCCGCTTTCAATTAATCATTCTGTCACCATTGTTGTCATCTTCTCTCT<br/> CTCTCTCTCTCTCGTGAATCTTTTCTCTCTTCAAAGTCTCTTTTAAACTTTTGCTTCTCTTTATAGGGAAACCA<br/> GACACGATCCACCGATTCCTTCTCAGCTTCTTCTTCTCTCTCTCTCTCTCTCTCTCTCTCTCTCTCTCTCTCTCTCTCT<br/> TCTCTTATTGGATTCTGATTCTTCAACNNNNNNNNNNNNNNNNNNNNNNNNNNNNNNNNNNNNNNNNNNNNNNNNNNNN<br/> TGCATGTTTCTCGATTCTCTGACACCTTCTTCTAACGTTTCTTCGGAAGCTGTTCCGTCATTTCCGATAA</p> |
