# Supplementary material for: Genome-wide identification and functional analysis of Dof transcription factor family in Camelina sativa
Source: PubMed Central journal article supplement (PMC9730592; doi:10.1186/s12864-022-09056-9), 2022-12-08
Supplement: 12864_2022_9056_MOESM13_ESM.pdf [file 12864_2022_9056_MOESM13_ESM.pdf]

**Table S11. The primer sequences of 6 CsDof genes used for qRT-PCR.**

| <b>Name</b>    | <b>Forward primer ( 5'-3')</b> | <b>Reverse primer ( 5'-3')</b> |
|----------------|--------------------------------|--------------------------------|
| <i>CsActin</i> | ACAATTTCCCGCTCTGCTGTTGTG       | AGGGTTTCTCTCTTCCACATGCCA       |
| <i>CsDof27</i> | TAGGAAAACGGTCAAGGGAT           | AAGG TTCAGCGACGACAAAG          |
| <i>CsDof54</i> | CAAGAGTCCTGCTTCTCATT           | CTTCATTTGGCAATGGGTTT           |
| <i>CsDof60</i> | ATCCGGCGATTAAGCTGTT            | AGAATCACCCATCTCATCTTCA         |
| <i>CsDof63</i> | CAGAGATATTGGACCGCAG            | CCTAGACACTAGCTTTGGAC           |
| <i>CsDof83</i> | CCTCAAGAATCATCAAACCG           | CCACTAGTAGTAGTACAATTCTGA       |
| <i>CsDof95</i> | AAGAGAGGGTTGTTACTACG           | TCATCGTTACTCCTCCGTAA           |
