# Supplementary material for: Genome-wide identification and functional analysis of Dof transcription factor family in Camelina sativa
Source: PubMed Central journal article supplement (PMC9730592; doi:10.1186/s12864-022-09056-9), 2022-12-08
Supplement: 12864_2022_9056_MOESM14_ESM.pdf [file 12864_2022_9056_MOESM14_ESM.pdf]

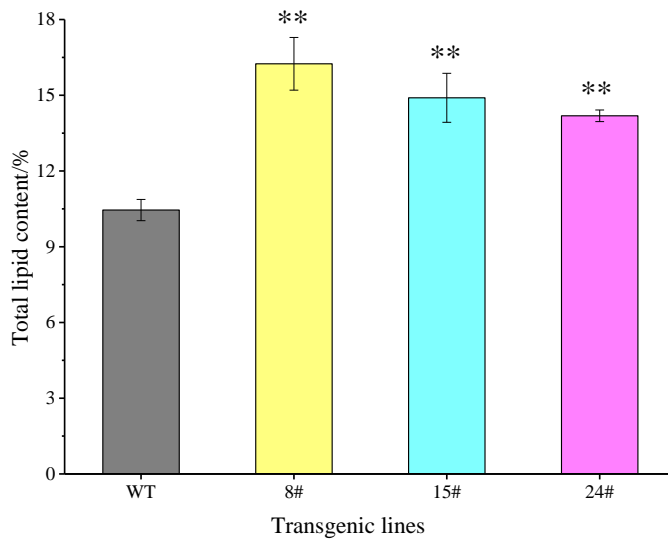

**Figure S3.** The total lipid content in leaves of wild type (WT) and *CsDof13*-transgenic lines (T1 tobacco plants). Statistical significance was determined by one-way ANOVA and multiple comparison by the Duncan method, \*\* $P < 0.01$ .

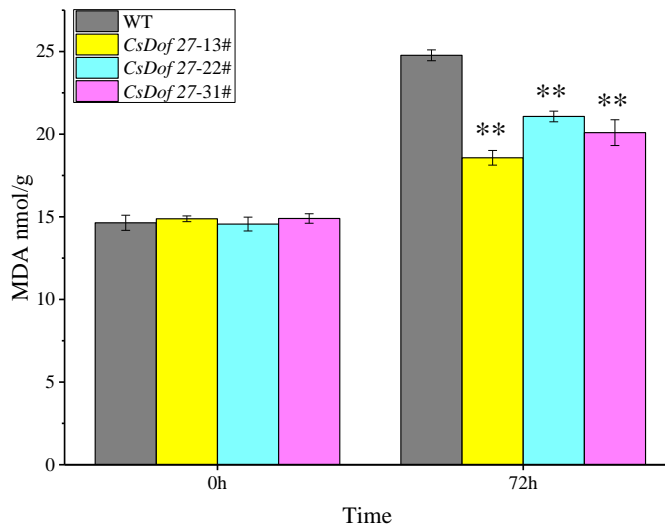

**Figure S4.** The Malondialdehyde (MDA) content of wild type (WT) and *CsDof27*-transgenic lines (T1 tobacco plants) before and after salt stress. Statistical significance was determined by one-way ANOVA and multiple comparison by the Duncan method, \*\* $P < 0.01$ .
